# Supplementary material for: Trapping of thermally generated ortho - and para -quinone methides by imidazoles and pyrazoles: a simple route to green synthesis of benzopyrone-azole hybrids and their evaluation as α-glucosidase inhibitors
Source: Royal Society of Chemistry journal article supplement (doi:10.1039/d4ra05230g), 2024-01-01

## Trapping of Thermally Generated *ortho*- and *para*-Quinone Methides by Imidazoles and Pyrazoles: a Simple Route to Green Synthesis of Benzopyrone-Azole Hybrids and their Evaluation as $\alpha$ -Glucosidase Inhibitors

Andrii S. Myshko,<sup>a,b</sup> Galyna P. Mrug,<sup>a</sup> Svitlana P. Bondarenko,<sup>c</sup> Kostyantyn M. Kondratyuk,<sup>a</sup> Oleksandr L. Kobzar,<sup>a</sup> Vladyslav M. Buldenko,<sup>a</sup> Andriy V. Kozytskiy,<sup>b,d</sup> Andriy I. Vovk,<sup>a</sup> and Mykhaylo S. Frasinyuk<sup>\*a,b</sup>

<sup>a</sup> V. P. Kukhar Institute of Bioorganic Chemistry and Petrochemistry NAS of Ukraine, 1 Academician Kukhar str., Kyiv 02094, Ukraine.

<sup>b</sup> Enamine Ltd., 78, Winston Churchill Str., Kyiv 02094, Ukraine. E-mail: mykhaylo.frasinyuk@ukr.net

<sup>c</sup> National University of Food Technologies, Kyiv 01601, Ukraine.

<sup>d</sup> ChemBioCenter, Taras Shevchenko National University of Kyiv, 64 Volodymyrska str., Kyiv 01601, Ukraine.

|                                                                                                  |      |
|--------------------------------------------------------------------------------------------------|------|
| Table S1. Inhibition of $\alpha$ -glucosidase by synthesized compound <b>4-5</b> and <b>9-14</b> | S2   |
| Characterization of compounds                                                                    | S7   |
| NMR spectra of synthesized compounds                                                             | S15  |
| LC-MS spectra of synthesized compounds                                                           | S139 |

**Table S1.** Inhibition of  $\alpha$ -glucosidase by synthesized compounds **4-5** and **9-14** <sup>[a]</sup>

| Compound | Structure                                                                           | Inhibition at 25 $\mu$ M (%) <sup>[b]</sup> | IC <sub>50</sub> , $\mu$ M |
|----------|-------------------------------------------------------------------------------------|---------------------------------------------|----------------------------|
| 4a       | 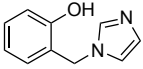   | N.I.                                        |                            |
| 4b       |    | 24.2                                        |                            |
| 4c       |    | N.I.                                        |                            |
| 4d       |    | N.I.                                        |                            |
| 5a       |    | 9.9                                         |                            |
| 5b       |    | 19.4                                        |                            |
| 5c       |    | N.I.                                        |                            |
| 5d       |   | N.I.                                        |                            |
| 5e       |  | N.I.                                        |                            |
| 5f       |  | 10.9                                        |                            |
| 5g       |  | N.I.                                        |                            |
| 5h       |  | 4.9                                         |                            |
| 9a       |  | N.I.                                        |                            |
| 9b       |  | 53.6                                        | 23.6 $\pm$ 1.8             |
| 9c       |  | 26.7                                        |                            |

| Compound | Structure | Inhibition at 25 $\mu$ M (%) <sup>[b]</sup> | IC <sub>50</sub> , $\mu$ M |
|----------|-----------|---------------------------------------------|----------------------------|
| 9d       |           | 42.0                                        | 27.0 $\pm$ 0.2             |
| 9e       |           | 11.8                                        |                            |
| 9f       |           | 1.08                                        |                            |
| 9g       |           | N.I.                                        |                            |
| 9h       |           | 12.8                                        |                            |
| 9i       |           | 73.7                                        | 20.0 $\pm$ 2.0             |
| 9j       |           | 29.9                                        |                            |
| 10a      |           | 13.3                                        |                            |
| 10b      |           | 69.3                                        | 21.1 $\pm$ 0.7             |

| Compound | Structure | Inhibition at 25 $\mu$ M (%) <sup>[b]</sup> | IC <sub>50</sub> , $\mu$ M |
|----------|-----------|---------------------------------------------|----------------------------|
| 10c      |           | 8.0                                         |                            |
| 10d      |           | 64.6                                        | 20.6±2.1                   |
| 10e      |           | 18.8                                        |                            |
| 10f      |           | 48.6                                        | 25.5±7.9                   |
| 10g      |           | 79.6                                        | 15.9±4.7                   |
| 10h      |           | 99.1                                        | 9.5±1.6                    |
| 11a      |           | N.I.                                        |                            |
| 11b      |           | 35.5                                        |                            |
| 11c      |           | N.I.                                        |                            |

| Compound | Structure | Inhibition at 25 $\mu\text{M}$ (%) <sup>[b]</sup> | IC <sub>50</sub> , $\mu\text{M}$ |
|----------|-----------|---------------------------------------------------|----------------------------------|
| 11d      |           | 62.5                                              | 16.2 $\pm$ 3.4                   |
| 11e      |           | 39.2                                              |                                  |
| 11f      |           | 27.7                                              |                                  |
| 11g      |           | 14.4                                              |                                  |
| 11h      |           | 15.2                                              |                                  |
| 11i      |           | 21.5                                              |                                  |
| 11j      |           | 84.1                                              | 14.3 $\pm$ 2.0                   |
| 12a      |           | 20.2                                              |                                  |
| 12b      |           | 14.2                                              |                                  |
| 12c      |           | 42.8                                              | 27.4 $\pm$ 1.9                   |

| Compound | Structure | Inhibition at 25 $\mu\text{M}$ (%) <sup>[b]</sup> | IC <sub>50</sub> , $\mu\text{M}$ |
|----------|-----------|---------------------------------------------------|----------------------------------|
| 12d      |           | 67.23                                             | 20.9±2.5                         |
| 12e      |           | N.I.                                              |                                  |
| 12f      |           | 14.5                                              |                                  |
| 12g      |           | 21.8                                              |                                  |
| 12h      |           | 66.9                                              | 21.16±0.66                       |
| 12i      |           | 94.0                                              | 5.8±0.2                          |
| 13a      |           | N.I.                                              |                                  |
| 13b      |           | 73.0                                              | 17.1±2.8                         |
| 14a      |           | N.I.                                              |                                  |

| Compound | Structure                                                                         | Inhibition at 25 $\mu$ M (%) <sup>[b]</sup> | IC <sub>50</sub> , $\mu$ M |
|----------|-----------------------------------------------------------------------------------|---------------------------------------------|----------------------------|
| 14b      | 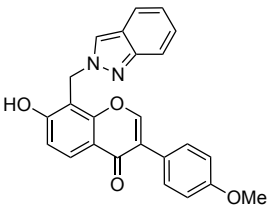 | 50.3                                        | 23.9 $\pm$ 2.3             |
| acarbose |                                                                                   |                                             | 760.6 $\pm$ 120.3          |

<sup>[a]</sup> IC<sub>50</sub> values are shown as average value  $\pm$  standard deviation; <sup>[b]</sup> N. I. – no inhibition

## Characterization of compounds

**2-(1H-imidazol-1-ylmethyl)phenol (4a).** Off-white solid, yield 122 mg (70%); mp 161–163 °C (lit<sup>1</sup> 161–164 °C); <sup>1</sup>H NMR (400 MHz, DMSO-*d*<sub>6</sub>):  $\delta$  10.03 (s, 1H), 7.70 (s, 1H), 7.18–7.09 (m, 2H), 7.05–6.99 (m, 1H), 6.91–6.83 (m, 2H), 6.79–6.73 (m, 1H), 5.09 ppm (s, 2H). <sup>13</sup>C{<sup>1</sup>H} NMR (125 MHz, DMSO-*d*<sub>6</sub>):  $\delta$  155.0, 137.5, 129.3, 129.2, 128.2, 123.8, 119.7, 119.1, 115.2, 45.0 ppm. MS (APCI) *m/z*: 175.2 [M+H]<sup>+</sup>. Anal. calcd (%) for C<sub>10</sub>H<sub>10</sub>N<sub>2</sub>O: C, 68.95; H, 5.79; N, 16.08. Found (%): C, 69.21; H, 5.88; N, 15.81.

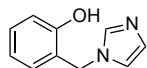

**2-(1H-Benzimidazol-1-ylmethyl)phenol (4b).** Off-white solid, yield 96 mg (43%); mp 235–237 °C (lit<sup>2</sup> 238–239 °C); <sup>1</sup>H NMR (400 MHz, DMSO-*d*<sub>6</sub>):  $\delta$  9.93 (s, 1H), 8.29 (s, 1H), 7.64 (d, *J* = 7.5 Hz, 1H), 7.57 (d, *J* = 7.5 Hz, 1H), 7.24–7.15 (m, 2H), 7.14–7.08 (m, 2H), 6.86 (d, *J* = 8.0 Hz, 1H), 6.74 (t, *J* = 7.5 Hz, 1H), 5.38 ppm (s, 2H); <sup>13</sup>C NMR (101 MHz, DMSO-*d*<sub>6</sub>):  $\delta$  155.2, 144.6, 143.4, 133.8, 129.4, 129.2, 122.7, 122.2, 121.4, 119.4, 119.1, 115.3, 110.7, 43.2 ppm. MS (APCI): *m/z* 225.0 [M+H]<sup>+</sup>. Anal. calcd (%) for C<sub>14</sub>H<sub>12</sub>N<sub>2</sub>O: C, 74.98; H, 5.39; N, 12.49. Found (%): C, 75.13; H, 5.17; N 12.68.

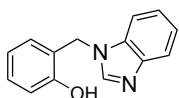

**2-(1H-Pyrazol-1-ylmethyl)phenol (4c).** Off-white solid, yield 85 mg (49%); mp 124–126 °C (lit<sup>3</sup> 123–125 °C); <sup>1</sup>H NMR (400 MHz, CDCl<sub>3</sub>)  $\delta$  10.30 (s, 1H), 7.53 (s, 1H), 7.47 (s, 1H), 7.22 (d, *J* = 7.7 Hz, 1H), 7.15 (d, *J* = 7.5 Hz, 1H), 6.99 (d, *J* = 8.1 Hz, 1H), 6.85 (t, *J* = 7.4 Hz, 1H), 6.27–6.19 (m, 1H), 5.21 ppm (s, 2H); <sup>13</sup>C NMR (101 MHz, CDCl<sub>3</sub>)  $\delta$  156.6, 139.3, 130.6, 130.2, 129.7, 123.4, 120.3, 118.9, 105.7, 53.4 ppm. MS (APCI): *m/z* 175.0 [M+H]<sup>+</sup>. Anal. calcd (%) for C<sub>10</sub>H<sub>10</sub>N<sub>2</sub>O: C, 68.95; H, 5.79; N, 16.08. Found (%): C, 68.71; H, 6.03; N, 16.17.

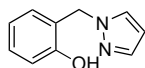

**2-[(3,5-Dimethyl-1H-pyrazol-1-yl)methyl]phenol (4d).** Off-white solid, yield 107 mg (53%); mp 154–156 °C (lit<sup>4</sup> 167–169 °C); <sup>1</sup>H NMR (400 MHz, DMSO-*d*<sub>6</sub>)  $\delta$  9.77 (s, 1H), 7.11–7.03 (m, 1H), 6.81 (dd, *J* = 8.1, 1.2 Hz, 1H), 6.70 (t, *J* = 7.4 Hz, 1H), 6.63–6.56 (m, 1H), 5.83 (s, 1H), 5.06 (s, 2H), 2.16 (s, 3H), 2.08 ppm (s, 3H); <sup>13</sup>C NMR (101 MHz, DMSO-*d*<sub>6</sub>)  $\delta$  154.4, 145.9, 139.0, 128.3, 128.0, 124.1, 119.1, 115.2, 104.7, 46.8, 13.4, 10.5 ppm. MS (APCI): *m/z* 203.0 [M+H]<sup>+</sup>. Anal. calcd (%) for C<sub>12</sub>H<sub>14</sub>N<sub>2</sub>O: C, 71.26; H, 6.98; N, 13.85. Found (%): C, 71.03; H, 7.17; N, 13.62.

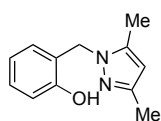

**4-(1H-Imidazol-1-ylmethyl)phenol (5a).** Off-white solid, yield 96 mg (55%); mp 206–208 °C (lit<sup>5</sup> 210–211 °C); <sup>1</sup>H NMR (400 MHz, DMSO-*d*<sub>6</sub>)  $\delta$  9.37 (s, 1H), 7.66 (s, 1H), 7.13–7.07 (m, 3H), 6.87 (s, 1H), 6.73 (d, *J* = 8.0 Hz, 2H), 5.03 ppm (s, 2H); <sup>13</sup>C NMR (125 MHz, DMSO-*d*<sub>6</sub>)  $\delta$  157.0, 137.1, 129.1, 128.5, 127.9, 119.3, 115.4, 49.2 ppm. MS (APCI): *m/z* 175.2 [M+H]<sup>+</sup>. Anal. calcd (%) for C<sub>10</sub>H<sub>10</sub>N<sub>2</sub>O: C, 68.95; H, 5.79; N, 16.08. Found (%): C, 68.76; H, 5.63; N, 16.35.

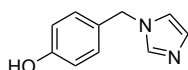

**4-(1H-Benzimidazol-1-ylmethyl)phenol (5b).** Off-white solid, yield 96 mg (43%); mp 228–230 °C; <sup>1</sup>H NMR (500 MHz, DMSO-*d*<sub>6</sub>)  $\delta$  9.44 (s, 1H), 8.34 (s, 1H), 7.63 (d, *J* = 7.6 Hz, 1H), 7.51 (d, *J* = 7.6 Hz, 1H), 7.22–7.13 (m, 4H), 6.70 (d, *J* = 8.0 Hz, 2H), 5.33 ppm (s, 2H); <sup>13</sup>C NMR (101 MHz, DMSO-*d*<sub>6</sub>)  $\delta$  157.0, 144.0, 143.6, 133.6, 129.0, 127.1, 122.3, 121.5, 119.4, 115.4, 110.8, 47.3 ppm. MS (APCI): *m/z* 225.0 [M+H]<sup>+</sup>. Anal. calcd (%) for C<sub>14</sub>H<sub>12</sub>N<sub>2</sub>O: C, 74.98; H, 5.39; N 12.49. Found (%): C, 74.71; H, 5.54; N, 12.65.

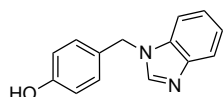

**4-(1H-Pyrazol-1-ylmethyl)phenol (5c).** Off-white solid, yield 91 mg (52%); mp 112–114 °C (lit<sup>3</sup> 114–115 °C); <sup>1</sup>H NMR (500 MHz, DMSO-*d*<sub>6</sub>)  $\delta$  9.41 (s, 1H), 7.71 (d, *J* = 2.3 Hz, 1H), 7.42 (d, *J* = 1.9 Hz, 1H), 7.07 (d, *J* = 8.4 Hz, 2H), 6.71 (d, *J* = 8.4 Hz, 2H), 6.24–6.20 (m, 1H), 5.17 ppm (s, 2H); <sup>13</sup>C NMR (125 MHz, DMSO-*d*<sub>6</sub>)  $\delta$  156.9, 138.7, 129.6, 129.1, 127.8, 115.2, 105.3, 54.4 ppm. MS (APCI): *m/z* 175.0 [M+H]<sup>+</sup>. Anal. calcd (%) for C<sub>10</sub>H<sub>10</sub>N<sub>2</sub>O: C, 68.95; H, 5.79; N, 16.08. Found (%): C, 69.18; H, 5.52; N, 16.14.

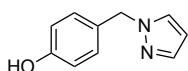

**4-[(3,5-Dimethyl-1H-pyrazol-1-yl)methyl]phenol (5d).** Off-white solid, yield 113 mg (56%); mp 171–173 °C; <sup>1</sup>H NMR (500 MHz, DMSO-*d*<sub>6</sub>) δ 9.34 (s, 1H), 6.93 (d, *J* = 8.6 Hz, 2H), 6.69 (d, *J* = 8.6 Hz, 2H), 5.79 (s, 1H), 5.02 (s, 2H), 2.13 (s, 3H), 2.07 ppm (s, 3H); <sup>13</sup>C NMR (101 MHz, DMSO-*d*<sub>6</sub>) δ 156.6, 145.7, 138.3, 128.3, 128.0, 115.2, 104.9, 51.2, 13.4, 10.7 ppm. MS (APCI): *m/z* 203.2 [M+H]<sup>+</sup>. Anal. calcd (%) for C<sub>12</sub>H<sub>14</sub>N<sub>2</sub>O: C, 71.26; H, 6.98; N, 13.85. Found (%): C, 71.12; H, 7.15; N, 13.96.

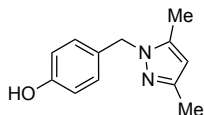

**4-(1H-Imidazol-1-ylmethyl)-2-methoxyphenol (5e).** Off-white solid, yield 161 mg (79%); mp 155–157 °C; <sup>1</sup>H NMR (400 MHz, DMSO-*d*<sub>6</sub>) δ 9.08 (s, 1H), 7.71 (d, *J* = 1.4 Hz, 1H), 7.16 (t, *J* = 1.3 Hz, 1H), 6.92 (d, *J* = 1.8 Hz, 1H), 6.88 (t, *J* = 1.2 Hz, 1H), 6.75 – 6.66 (m, 2H), 5.03 (s, 2H), 3.74 ppm (s, 3H); <sup>13</sup>C NMR (101 MHz, DMSO-*d*<sub>6</sub>) δ 147.7, 146.3, 137.2, 128.5, 128.4, 120.5, 119.4, 115.5, 112.2, 55.6, 49.5 ppm. MS (APCI): *m/z* 205.0 [M+H]<sup>+</sup>. Anal. calcd (%) for C<sub>11</sub>H<sub>12</sub>N<sub>2</sub>O<sub>2</sub>: C, 64.69; H, 5.92; N, 13.72. Found (%): C, 64.42; H, 6.16; N, 13.56.

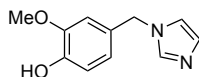

**4-(1H-Benzimidazol-1-ylmethyl)-2-methoxyphenol (5f).** Off-white solid, yield 135 mg (53%); mp 178–180 °C; <sup>1</sup>H NMR (400 MHz, DMSO-*d*<sub>6</sub>) δ 9.03 (s, 1H), 8.37 (s, 1H), 7.64 (dd, *J* = 7.1, 1.9 Hz, 1H), 7.59 – 7.54 (m, 1H), 7.25 – 7.14 (m, 2H), 7.02 (d, *J* = 1.6 Hz, 1H), 6.78 – 6.66 (m, 2H), 5.34 (s, 2H), 3.73 ppm (s, 3H); <sup>13</sup>C NMR (101 MHz, DMSO-*d*<sub>6</sub>) δ 147.7, 146.3, 144.1, 143.6, 133.7, 127.6, 122.3, 121.5, 120.4, 119.4, 115.5, 112.2, 110.9, 55.7, 47.7 ppm. MS (APCI): *m/z* 255.0 [M+H]<sup>+</sup>. Anal. calcd (%) for C<sub>15</sub>H<sub>14</sub>N<sub>2</sub>O<sub>2</sub>: C, 70.85; H, 5.55; N, 11.02. Found (%): C, 70.59; H, 5.82; N, 11.31.

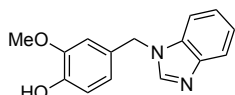

**2-Methoxy-4-(1H-pyrazol-1-ylmethyl)phenol (5g).** Off-white solid, yield 155 mg (76%); mp 173–175 °C; <sup>1</sup>H NMR (400 MHz, DMSO-*d*<sub>6</sub>) δ 8.91 (s, 1H), 7.72 (s, 1H), 7.43 (s, 1H), 6.87 (s, 1H), 6.72 (d, *J* = 7.9 Hz, 1H), 6.65 (d, *J* = 7.9 Hz, 1H), 6.23 (s, 1H), 5.18 (s, 2H), 3.72 ppm (s, 3H); <sup>13</sup>C NMR (125 MHz, DMSO-*d*<sub>6</sub>) δ 147.5, 146.1, 138.7, 129.7, 128.4, 120.5, 115.3, 112.2, 105.3, 55.6, 54.7 ppm. MS (APCI): *m/z* 205.2 [M+H]<sup>+</sup>. Anal. calcd (%) for C<sub>11</sub>H<sub>12</sub>N<sub>2</sub>O<sub>2</sub>: C, 64.69; H, 5.92; N, 13.72. Found (%): C, 64.92; H, 5.71; N, 13.98.

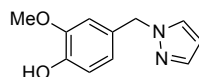

**4-[(3,5-Dimethyl-1H-pyrazol-1-yl)methyl]-2-methoxyphenol (5h).** Off-white solid, yield 125 mg (54%); mp 151–153 °C; <sup>1</sup>H NMR (500 MHz, DMSO-*d*<sub>6</sub>) δ 8.94 (s, 1H), 6.75 (s, 1H), 6.71 (d, *J* = 8.0 Hz, 1H), 6.48 (d, *J* = 8.0 Hz, 1H), 5.81 (s, 1H), 5.04 (s, 2H), 3.71 (s, 3H), 2.15 (s, 3H), 2.09 ppm (s, 3H); <sup>13</sup>C NMR (125 MHz, DMSO-*d*<sub>6</sub>) δ 147.5, 145.8, 145.7, 138.4, 128.7, 119.5, 115.4, 111.4, 104.9, 55.6, 51.5, 13.4, 10.7 ppm. MS (APCI): *m/z* 233.2 [M+H]<sup>+</sup>. Anal. calcd (%) for C<sub>13</sub>H<sub>16</sub>N<sub>2</sub>O<sub>2</sub>: C, 67.22; H, 6.94; N, 12.06. Found (%): C, 67.48; H, 6.88; N, 12.27.

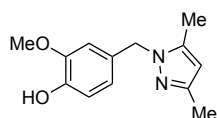

**7-Hydroxy-3-[4-(trifluoromethoxy)phenyl]-4H-chromen-4-one (6j).** Off-white solid, yield 2417 mg (75%); mp 225–227 °C; <sup>1</sup>H NMR (400 MHz, DMSO-*d*<sub>6</sub>) δ 10.86 (s, 1H), 8.45 (s, 1H), 7.99 (d, *J* = 8.7 Hz, 1H), 7.71 (d, *J* = 8.7 Hz, 2H), 7.42 (d, *J* = 8.7 Hz, 2H), 6.96 (dd, *J* = 8.7, 2.3 Hz, 1H), 6.90 ppm (d, *J* = 2.3 Hz, 1H); <sup>13</sup>C NMR (125 MHz, DMSO-*d*<sub>6</sub>) δ 174.2, 162.8, 157.5, 154.2, 147.9, 131.5, 130.8, 127.3, 122.3, 120.7, 120.2 (q, *J* = 256.6 Hz), 116.5, 115.4, 102.2 ppm; <sup>19</sup>F NMR (376 MHz, DMSO-*d*<sub>6</sub>) δ -57.3 ppm. MS (APCI): *m/z* 323.0 [M+H]<sup>+</sup>. Anal. calcd (%) for C<sub>16</sub>H<sub>9</sub>F<sub>3</sub>O<sub>4</sub>: C, 59.64; H, 2.82. Found (%): C, 59.78; H, 2.65.

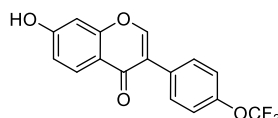

**8-[(Dimethylamino)methyl]-7-hydroxy-2,3-dimethyl-4H-chromen-4-one (8c).** Off-white solid, yield 450 mg (91%); mp 170–172 °C; <sup>1</sup>H NMR (400 MHz, CDCl<sub>3</sub>) δ 10.82 (s, 1H), 7.94 (d, *J* = 8.8 Hz, 1H), 6.77 (d, *J* = 8.8 Hz, 1H), 3.89 (s, 2H), 2.37 (s, 6H), 2.32 (s, 3H), 1.96 ppm (s, 3H); <sup>13</sup>C NMR (126 MHz, CDCl<sub>3</sub>) δ 177.5, 163.4, 160.4, 154.7, 126.2, 116.1, 115.2, 114.9, 106.9, 55.1, 44.6, 18.4, 9.9 ppm; MS (APCI): *m/z* 248.3 [M+H]<sup>+</sup>. Anal. calcd (%) for C<sub>14</sub>H<sub>17</sub>NO<sub>3</sub>: C, 68.00; H, 6.93; N, 5.66. Found (%): C, 67.73; H, 7.18; N, 5.39.

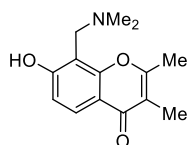

**8-[(Dimethylamino)methyl]-7-hydroxy-3-(4-hydroxyphenyl)-4H-chromen-4-one (8d).** Off-white solid, yield 221 mg (71%); mp 285–287 °C; <sup>1</sup>H NMR (400 MHz, DMSO-*d*<sub>6</sub>) δ 8.30 (s, 1H), 7.90 (d, *J* = 8.8 Hz, 1H), 7.38 (d, *J* = 8.6 Hz, 2H), 6.86 (d, *J* = 8.8 Hz, 1H), 6.80 (d, *J* = 8.6 Hz, 2H), 3.93 (s, 2H), 2.34 ppm (s, 6H); <sup>13</sup>C NMR (101 MHz, DMSO-*d*<sub>6</sub>) δ 174.8, 163.9, 157.2, 155.0, 152.4, 130.1, 125.7, 123.3, 122.5, 115.8, 115.2, 114.9, 108.3, 53.3, 44.0 ppm. MS (APCI): *m/z* 312.2 [M+H]<sup>+</sup>. Anal. calcd (%) for C<sub>18</sub>H<sub>17</sub>NO<sub>4</sub>: C, 69.44; H, 5.50; N, 4.50. Found (%): C, 69.29; H, 5.34; N, 4.69.

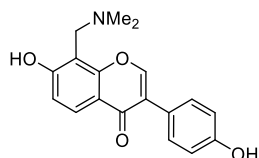

**8-[(Dimethylamino)methyl]-7-hydroxy-3-[4-(trifluoromethoxy)phenyl]-4H-chromen-4-one (8j).** Off-white solid, yield 1669 mg (88%); mp 168–170 °C; <sup>1</sup>H NMR (500 MHz, CDCl<sub>3</sub>) δ 11.94 (s, 1H), 8.06 (d, *J* = 8.8 Hz, 1H), 7.87 (s, 1H), 7.54 (d, *J* = 8.2 Hz, 2H), 7.21 (d, *J* = 8.2 Hz, 2H), 6.85 (d, *J* = 8.8 Hz, 1H), 3.93 (s, 2H), 2.38 ppm (s, 6H); <sup>13</sup>C NMR (126 MHz, CDCl<sub>3</sub>) δ 175.4, 164.5, 155.0, 152.0, 149.0, 130.9, 130.4, 126.6, 123.6, 120.8, 120.5 (q, *J* = 256.6 Hz), 116.8, 115.8, 107.6, 55.1, 44.5 ppm; <sup>19</sup>F NMR (376 MHz, CDCl<sub>3</sub>) δ -58.8 ppm. MS (APCI): *m/z* 380.0 [M+H]<sup>+</sup>. Anal. calcd (%) for C<sub>19</sub>H<sub>16</sub>F<sub>3</sub>NO<sub>4</sub>: C, 60.16; H, 4.25; N, 3.69. Found (%): C, 60.32; H, 4.47; N, 3.82.

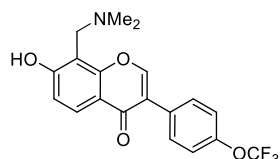



**7-Hydroxy-8-(1H-imidazol-1-ylmethyl)-2H-chromen-2-one (9a).** Off-white solid, yield 177 mg (73%); mp 292–294°C; <sup>1</sup>H NMR (400 MHz, DMSO-*d*<sub>6</sub>) δ 7.90 (d, *J* = 9.4 Hz, 1H), 7.63 (s, 1H), 7.50 (d, *J* = 8.4 Hz, 1H), 7.09 (s, 1H), 6.91 (d, *J* = 8.4 Hz, 1H), 6.85 (s, 1H), 6.21 (d, *J* = 9.4 Hz, 1H), 5. ppm 26 (s, 2H); <sup>13</sup>C NMR (126 MHz, DMSO-*d*<sub>6</sub>) δ 160.9, 160.4, 154.2, 145.6, 135.8, 131.2, 122.5, 120.7, 113.4, 112.2, 112.1, 107.8, 41.5 ppm. MS (APCI): *m/z* 243.0 [M+H]<sup>+</sup>. Anal. calcd (%) for C<sub>13</sub>H<sub>10</sub>N<sub>2</sub>O<sub>3</sub>: C, 64.46; H, 4.16; N, 11.56. Found (%): C, 64.59; H, 4.03; N, 11.42.

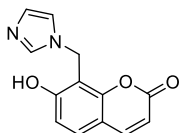

**7-Hydroxy-8-(1H-imidazol-1-ylmethyl)-4-methyl-2H-chromen-2-one (9b).** Off-white solid, yield 241 mg (94%); mp 250–252°C; <sup>1</sup>H NMR (400 MHz, DMSO-*d*<sub>6</sub>) δ 11.09 (s, 1H), 7.62 (s, 1H), 7.58 (d, *J* = 8.8 Hz, 1H), 7.05 (s, 1H), 6.89 (d, *J* = 8.8 Hz, 1H), 6.81 (s, 1H), 6.15 (s, 1H), 5.21 (s, 2H), 2.32 ppm (s, 3H); <sup>13</sup>C NMR (101 MHz, DMSO-*d*<sub>6</sub>) δ 159.7, 159.2, 153.8, 152.9, 137.2, 128.1, 126.4, 119.3, 112.3, 112.1, 110.2, 110.1, 37.9, 18.2 ppm; MS (APCI): *m/z* 257.0 [M+H]<sup>+</sup>. Anal. calcd (%) for C<sub>14</sub>H<sub>12</sub>N<sub>2</sub>O<sub>3</sub>: C, 65.62; H, 4.72; N, 10.93. Found (%): C, 65.48; H, 4.93; N, 10.78.

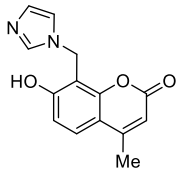

**7-Hydroxy-8-(1H-imidazol-1-ylmethyl)-2,3-dimethyl-4H-chromen-4-one (9c).** Off-white solid, yield 246 mg (91%); mp 255–257 °C; <sup>1</sup>H NMR (400 MHz, DMSO-*d*<sub>6</sub>) δ 7.84 (d, *J* = 8.6 Hz, 1H), 7.73 (s, 1H), 7.12 (s, 1H), 6.99 (d, *J* = 8.6 Hz, 1H), 6.85 (s, 1H), 5.29 (s, 2H), 2.43 (s, 3H), 1.90 ppm (s, 3H); <sup>13</sup>C NMR (126 MHz, DMSO-*d*<sub>6</sub>) δ 175.8, 161.3, 160.3, 155.0, 137.4, 128.2, 126.5, 119.4, 115.3, 114.7, 114.0, 110.1, 37.9, 18.1, 9.6 ppm; MS (APCI): *m/z* 271.0 [M+H]<sup>+</sup>. Anal. calcd (%) for C<sub>15</sub>H<sub>14</sub>N<sub>2</sub>O<sub>3</sub>: C, 66.66; H, 5.22; N, 10.36. Found (%): C, 66.87; H, 5.03; N, 10.13.

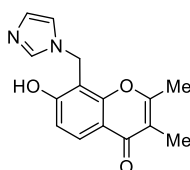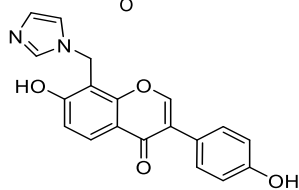

**7-Hydroxy-3-(4-hydroxyphenyl)-8-(1H-imidazol-1-ylmethyl)-4H-chromen-4-one (9d).** Off-white solid, yield 244 mg (73%); mp 211–213 °C; <sup>1</sup>H NMR (400 MHz, DMSO-*d*<sub>6</sub>) δ 9.59 (s, 1H), 8.39 (s, 1H), 7.97 (d, *J* = 8.8 Hz, 1H), 7.72 (s, 1H), 7.38 (d, *J* = 8.3 Hz, 2H), 7.15 (s, 1H), 7.05 (d, *J* = 8.8 Hz, 1H), 6.85 (s, 1H), 6.81 (d, *J* = 8.3 Hz, 2H), 5.30 ppm (s, 2H); <sup>13</sup>C NMR (126 MHz, DMSO-*d*<sub>6</sub>) δ 174.8, 160.8, 157.3, 155.5, 152.8, 137.4, 130.1, 128.2, 127.1, 123.5, 122.4, 119.6, 116.6, 115.1, 114.6, 110.4, 38.0 ppm; MS (APCI): *m/z* 335.0 [M+H]<sup>+</sup>. Anal. calcd (%) for C<sub>19</sub>H<sub>14</sub>N<sub>2</sub>O: C, 68.26; H, 4.22; N, 8.38. Found (%): C, 68.53; H, 4.07; N, 8.75.

**7-Hydroxy-8-(1H-imidazol-1-ylmethyl)-3-(4-methoxyphenyl)-4H-chromen-4-one (9e).** Off-white solid, yield 292 mg (85%); mp 223–224°C; <sup>1</sup>H NMR (400 MHz, DMSO-*d*<sub>6</sub>) δ 8.44 (s, 1H), 7.98 (d, *J* = 8.8 Hz, 1H), 7.73 (s, 1H), 7.51 (d, *J* = 8.7 Hz, 2H), 7.16 (s, 1H), 7.06 (d, *J* = 8.8 Hz, 1H), 6.99 (d, *J* = 8.7 Hz, 2H), 6.86 (s, 1H), 5.31 (s, 2H), 3.79 ppm (s, 3H); <sup>13</sup>C NMR (101 MHz, DMSO-*d*<sub>6</sub>) δ 174.6, 160.8, 159.0, 155.4, 153.0, 137.3, 130.0, 128.2, 127.0, 124.0, 123.1, 119.4, 116.5, 114.6, 113.6, 110.4, 55.1, 37.9 ppm; MS (APCI): *m/z* 349.2 [M+H]<sup>+</sup>. Anal. calcd (%) for C<sub>20</sub>H<sub>16</sub>N<sub>2</sub>O<sub>4</sub>: C, 68.96; H, 4.63; N, 8.04. Found (%): C, 69.15; H, 4.77; N, 8.16.

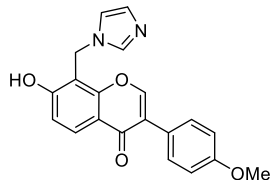

**3-(3,4-Dimethoxyphenyl)-7-hydroxy-8-(1H-imidazol-1-ylmethyl)-4H-chromen-4-one (9f).** Off-white solid, yield 348 mg (92%); mp 238–239°C; <sup>1</sup>H NMR (400 MHz, DMSO-*d*<sub>6</sub>) δ 8.47 (s, 1H), 7.99 (d, *J* = 8.8 Hz, 1H), 7.72 (s, 1H), 7.22 – 7.13 (m, 3H), 7.07 (d, *J* = 8.9 Hz, 1H), 7.01 (d, *J* = 8.4 Hz, 1H), 6.87 – 6.84 (m, 1H), 5.32 (s, 2H), 3.78 ppm (s, 6H); <sup>13</sup>C NMR (126 MHz, DMSO-*d*<sub>6</sub>) δ 174.6, 160.9, 155.4, 153.2, 148.7, 148.3, 137.4, 128.2, 127.1, 124.4, 123.2, 121.2, 119.5, 116.5, 114.6, 112.7, 111.6, 110.3, 55.5, 38.0 ppm; MS (APCI): *m/z* 379.2 [M+H]<sup>+</sup>. Anal. calcd (%) for C<sub>21</sub>H<sub>18</sub>N<sub>2</sub>O<sub>5</sub>: C, 66.66; H, 4.80; N, 7.40. Found (%): C, 66.54; H, 4.96; N, 7.23.

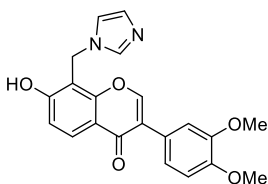

**3-(1,3-Benzodioxol-5-yl)-7-hydroxy-8-(1H-imidazol-1-ylmethyl)-4H-chromen-4-one (9g).** Off-white solid, yield 312 mg (86%); mp 255–257 °C; <sup>1</sup>H NMR (400 MHz, DMSO-*d*<sub>6</sub>) δ 11.43 (s, 1H), 8.44 (s, 1H), 7.98 (d, *J* = 8.8 Hz, 1H), 7.72 (s, 1H), 7.19 – 7.13 (m, 2H), 7.10 – 7.03 (m, 2H), 6.97 (d, *J* = 8.0 Hz, 1H), 6.86 (s, 1H), 6.05 (s, 2H), 5.31 ppm (s, 2H); <sup>13</sup>C NMR (126 MHz, DMSO-*d*<sub>6</sub>) δ 174.5, 161.0, 155.4, 153.4, 147.0, 147.0, 137.4, 128.3, 127.1, 125.6, 123.1, 122.4, 119.4, 116.4, 114.7, 110.4, 109.4, 108.1, 101.1, 37.9 ppm; MS (APCI): *m/z* 363.2 [M+H]<sup>+</sup>. Anal. calcd (%) for C<sub>20</sub>H<sub>14</sub>N<sub>2</sub>O<sub>5</sub>: C, 66.30; H, 3.89; N, 7.73. Found (%): C, 66.04; H, 3.62; N, 7.56.

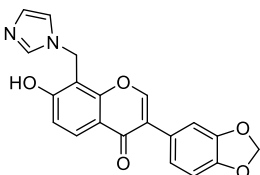

**7-Hydroxy-8-(1H-imidazol-1-ylmethyl)-3-(4-methoxyphenyl)-2-methyl-4H-chromen-4-one (9h).** Off-white solid, yield 300 mg (83%); mp 217–218°C; <sup>1</sup>H NMR (400 MHz, DMSO-*d*<sub>6</sub>) δ 11.26 (s, 1H), 7.88 (d, *J* = 8.8 Hz, 1H), 7.75 (s, 1H), 7.20 (d, *J* = 8.6 Hz, 2H), 7.17 (s, 1H), 7.03 (d, *J* = 8.8 Hz, 1H), 6.98 (d, *J* = 8.6 Hz, 2H), 6.87 (s, 1H), 5.34 (s, 2H), 3.80 (s, 3H), 2.33 ppm (s, 3H); <sup>13</sup>C NMR (101 MHz, DMSO-*d*<sub>6</sub>) δ 175.0, 162.5, 160.4, 158.6, 155.0, 137.4, 131.6, 128.3, 126.9, 125.1, 121.7, 119.5, 115.5, 114.1, 113.5, 110.3, 55.1, 37.9, 19.1 ppm; MS (APCI): *m/z* 363.0 [M+H]<sup>+</sup>. Anal. calcd (%) for C<sub>21</sub>H<sub>18</sub>N<sub>2</sub>O<sub>4</sub>: C, 69.60; H, 5.01; N, 7.73. Found (%): C, 69.37; H, 4.87; N, 7.96.

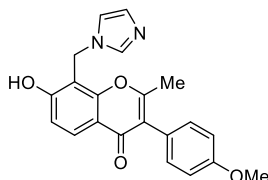

**7-Hydroxy-8-(1H-imidazol-1-ylmethyl)-3-(4-methoxyphenyl)-2-(trifluoromethyl)-4H-chromen-4-one (9i).** Off-white solid, yield 358 mg (86%); mp 230–232 °C; <sup>1</sup>H NMR (500 MHz, DMSO-*d*<sub>6</sub>) δ 7.92 (d, *J* = 8.8 Hz, 1H), 7.69 (s, 1H), 7.18 (d, *J* = 8.3 Hz, 2H), 7.14 – 7.09 (m, 2H), 6.98 (d, *J* = 8.3 Hz, 2H), 6.89 (s, 1H), 5.31 (s, 2H), 3.78 ppm (s, 3H); <sup>13</sup>C NMR (126 MHz, DMSO-*d*<sub>6</sub>) δ 175.4, 162.0, 159.4, 154.4, 146.3 (q, *J* = 35.1 Hz), 137.2, 131.1, 128.2, 127.3, 124.7, 121.1, δ 119.5 (q, *J* = 276.1 Hz); 119.3, 115.6, 115.3, 113.4, 110.5, 55.1, 37.9 ppm; <sup>19</sup>F NMR (376 MHz, DMSO-*d*<sub>6</sub>) δ -63.0 ppm; MS (APCI): *m/z* 417.0 [M+H]<sup>+</sup>. Anal. calcd (%) for C<sub>21</sub>H<sub>15</sub>F<sub>3</sub>N<sub>2</sub>O<sub>4</sub>: C, 60.58; H, 3.63; N, 6.73. Found (%): C, 60.73; H, 3.49; N, 6.56.

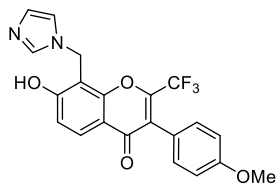

**7-Hydroxy-8-(1H-imidazol-1-ylmethyl)-3-[4-(trifluoromethoxy)phenyl]-4H-chromen-4-one (9j).** Off-white solid, yield 342 mg (85%); mp 248–250 °C; <sup>1</sup>H NMR (500 MHz, DMSO-*d*<sub>6</sub>) δ 8.50 (s, 1H), 7.97 (d, *J* = 8.8 Hz, 1H), 7.75 (s, 1H), 7.70 (d, *J* = 8.2 Hz, 2H), 7.39 (d, *J* = 8.2 Hz, 2H), 7.16 (s, 1H), 7.07 (d, *J* = 8.8 Hz, 1H), 6.87 (s, 1H), 5.31 ppm (s, 2H); <sup>13</sup>C NMR (126 MHz, DMSO-*d*<sub>6</sub>) δ 174.3, 161.4, 155.5, 154.1, 148.0, 137.4, 131.4, 130.8, 128.2, 127.1, 122.3, 120.7, 120.2 (q, *J* = 256.2 Hz), 119.5, 116.3, 114.9, 110.4, 38.0 ppm; <sup>19</sup>F NMR (376 MHz, DMSO-*d*<sub>6</sub>) δ -57.3 ppm. MS (APCI): *m/z* 403.0 [M+H]<sup>+</sup>. Anal. calcd (%) for C<sub>20</sub>H<sub>13</sub>F<sub>3</sub>N<sub>2</sub>O<sub>4</sub>: C, 59.71; H, 3.26; N, 6.96. Found (%): C, 59.47; H, 3.03; N, 7.11.

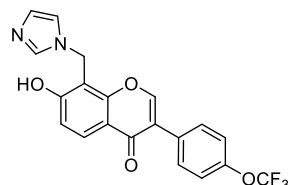

**8-(1H-Benzimidazol-1-ylmethyl)-7-hydroxy-2H-chromen-2-one (10a).** Off-white solid, yield 219 mg (75%); mp 312–314 °C; <sup>1</sup>H NMR (400 MHz, DMSO-*d*<sub>6</sub>) δ 11.28 (s, 1H), 8.28 (s, 1H), 7.93 (d, *J* = 9.5 Hz, 1H), 7.72 (d, *J* = 7.9 Hz, 1H), 7.61 (d, *J* = 7.8 Hz, 1H), 7.52 (d, *J* = 8.5 Hz, 1H), 7.19 (dt, *J* = 22.0, 7.3 Hz, 2H), 6.92 (d, *J* = 8.5 Hz, 1H), 6.25 (d, *J* = 9.5 Hz, 1H), 5.52 ppm (s, 2H); <sup>13</sup>C NMR (126 MHz, DMSO-*d*<sub>6</sub>+CF<sub>3</sub>SO<sub>3</sub>H) δ 159.9, 154.0, 144.9, 142.5, 131.0, 130.7, 130.7, 126.7, 126.5, 115.1, 113.1, 112.8, 111.9, 111.7, 106.9, 39.4 ppm; MS (APCI): *m/z* 293.0 [M+H]<sup>+</sup>. Anal. calcd (%) for C<sub>17</sub>H<sub>12</sub>N<sub>2</sub>O<sub>3</sub>: C, 69.86; H, 4.14; N, 9.58. Found (%): C, 69.98; H, 4.37; N, 9.43.

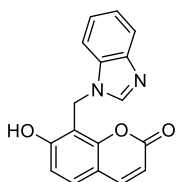

**8-(1H-Benzimidazol-1-ylmethyl)-7-hydroxy-4-methyl-2H-chromen-2-one (10b).** Off-white solid, yield 211 mg (69%); mp 265–267 °C; <sup>1</sup>H NMR (400 MHz, DMSO-*d*<sub>6</sub>) δ 11.21 (s, 1H), 8.26 (s, 1H), 7.72 (d, *J* = 7.8 Hz, 1H), 7.63 – 7.54 (m, 2H), 7.24 – 7.12 (m, 2H), 6.94 (d, *J* = 8.7 Hz, 1H), 6.17 (s, 1H), 5.53 (s, 2H), 2.34 ppm (s, 3H); <sup>13</sup>C NMR (126 MHz, DMSO-*d*<sub>6</sub>) δ 159.6, 159.3, 153.9, 153.0, 144.7, 143.1, 133.6, 126.4, 122.3, 121.5, 119.3, 112.3, 112.1, 110.4, 110.2, 109.4, 36.6, 18.2 ppm; MS (APCI): *m/z* 307.2 [M+H]<sup>+</sup>. Anal. calcd (%) for C<sub>18</sub>H<sub>14</sub>N<sub>2</sub>O<sub>3</sub>: C, 70.58; H, 4.61; N, 9.15. Found (%): C, 70.32; H, 4.78; N, 9.02.

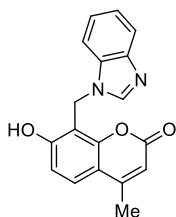

**8-(1H-Benzimidazol-1-ylmethyl)-7-hydroxy-2,3-dimethyl-4H-chromen-4-one (10c).** Off-white solid, yield 224 mg (70%); mp 275–277 °C; <sup>1</sup>H NMR (500 MHz, DMSO-*d*<sub>6</sub>) δ 11.37 (s, 1H), 8.34 (s, 1H), 7.82 (d, *J* = 8.8 Hz, 1H), 7.64 (d, *J* = 8.0 Hz, 1H), 7.59 (d, *J* = 7.9 Hz, 1H), 7.23 – 7.17 (m, 1H), 7.16 – 7.10 (m, 1H), 7.00 (d, *J* = 8.8 Hz, 1H), 5.57 (s, 2H), 2.40 (s, 3H), 1.85 ppm (s, 3H); <sup>13</sup>C NMR (126 MHz, DMSO-*d*<sub>6</sub>) δ 175.7, 161.2, 160.0, 155.3, 144.8, 143.2, 133.6, 126.5, 122.3, 121.4, 119.4, 115.5, 114.9, 114.0, 110.3, 109.1, 36.6, 18.0, 9.5 ppm; MS (APCI): *m/z* 321.0 [M+H]<sup>+</sup>. Anal. calcd (%) for C<sub>19</sub>H<sub>16</sub>N<sub>2</sub>O<sub>3</sub>: C, 71.24; H, 5.03; N, 8.74. Found (%): C, 71.41; H, 4.82; N, 8.96.

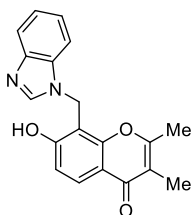

**8-(1H-Benzimidazol-1-ylmethyl)-7-hydroxy-3-(4-methoxyphenyl)-4H-chromen-4-one (10d).** Off-white solid, yield 283 mg (71%); mp 262–263 °C; <sup>1</sup>H NMR (400 MHz, DMSO-*d*<sub>6</sub>) δ 11.52 (s, 1H), 8.53 (s, 1H), 8.36 (s, 1H), 7.98 (d, *J* = 8.8 Hz, 1H), 7.76 – 7.70 (m, 1H), 7.65 – 7.59 (m, 1H), 7.51 (d, *J* = 8.7 Hz, 2H), 7.28 – 7.21 (m, 1H), 7.20 – 7.14 (m, 1H), 7.08 (d, *J* = 8.8 Hz, 1H), 6.99 (d, *J* = 8.7 Hz, 2H), 5.59 (s, 2H), 3.79 ppm (s, 3H); <sup>13</sup>C NMR (101 MHz, DMSO-*d*<sub>6</sub>) δ 174.7, 160.7, 159.1, 155.7, 153.0, 144.8, 143.2, 133.7, 130.1, 127.2, 124.0, 123.3, 122.5, 121.6, 119.4, 116.7, 114.6, 113.7, 110.4, 109.6, 55.2, 36.6 ppm; MS (APCI): *m/z* 399.2 [M+H]<sup>+</sup>. Anal. calcd (%) for C<sub>24</sub>H<sub>18</sub>N<sub>2</sub>O<sub>4</sub>: C, 72.35; H, 4.55; N, 7.03. Found (%): C, 72.09; H, 4.71; N, 7.28.

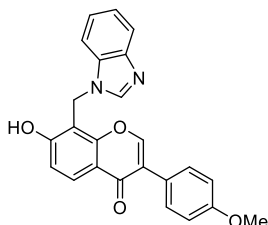

**8-(1*H*-Benzimidazol-1-ylmethyl)-3-(3,4-dimethoxyphenyl)-7-hydroxy-4*H*-chromen-4-one (10e).** Off-white solid, yield 380 mg (89%); mp 269–270 °C; <sup>1</sup>H NMR (400 MHz, DMSO-*d*<sub>6</sub>) δ 11.56 (s, 1H), 8.56 (s, 1H), 8.36 (s, 1H), 7.98 (d, *J* = 8.9 Hz, 1H), 7.72 (d, *J* = 8.0 Hz, 1H), 7.62 (d, *J* = 7.8 Hz, 1H), 7.28–7.21 (m, 1H), 7.20–7.11 (m, 3H), 7.08 (d, *J* = 8.9 Hz, 1H), 7.00 (d, *J* = 8.4 Hz, 1H), 5.59 (s, 2H), 3.78 (s, 3H), 3.78 ppm (s, 3H); <sup>13</sup>C NMR (101 MHz, DMSO-*d*<sub>6</sub>) δ 174.6, 160.7, 155.7, 153.3, 148.7, 148.3, 144.9, 143.2, 133.7, 127.2, 124.3, 123.4, 122.5, 121.6, 121.3, 119.5, 116.8, 114.7, 112.6, 111.5, 110.4, 109.6, 55.6, 55.5, 36.7 ppm; MS (APCI): *m/z* 429.2 [M+H]<sup>+</sup>. Anal. calcd (%) for C<sub>25</sub>H<sub>20</sub>N<sub>2</sub>O<sub>5</sub>: C, 70.09; H, 4.71; N, 6.54. Found (%): C, 69.83; H, 4.90; N, 6.37.

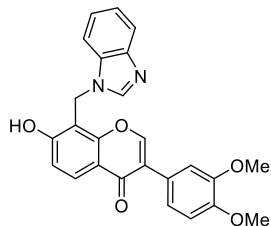

**8-(1*H*-Benzimidazol-1-ylmethyl)-7-hydroxy-3-(4-methoxyphenyl)-2-methyl-4*H*-chromen-4-one (10f).** Off-white solid, yield 297 mg (72%); mp 339–341 °C; <sup>1</sup>H NMR (400 MHz, DMSO-*d*<sub>6</sub>) δ 11.46 (s, 1H), 8.39 (s, 1H), 7.87 (d, *J* = 8.8 Hz, 1H), 7.71 (d, *J* = 8.0 Hz, 1H), 7.63 (d, *J* = 7.9 Hz, 1H), 7.27–7.13 (m, 4H), 7.06 (d, *J* = 8.8 Hz, 1H), 6.96 (d, *J* = 8.7 Hz, 2H), 5.63 (s, 2H), 3.78 (s, 3H), 2.31 ppm (s, 3H); <sup>13</sup>C NMR (101 MHz, DMSO-*d*<sub>6</sub>) δ 174.9, 162.3, 160.3, 158.6, 155.3, 144.8, 143.1, 133.7, 131.6, 126.9, 124.9, 122.3, 121.8, 121.5, 119.4, 115.7, 114.2, 113.5, 110.3, 109.3, 55.1, 36.6, 19.0 ppm; MS (APCI): *m/z* 413.2 [M+H]<sup>+</sup>. Anal. calcd (%) for C<sub>25</sub>H<sub>20</sub>N<sub>2</sub>O<sub>4</sub>: C, 72.80; H, 4.89; N, 6.79. Found (%): C, 72.96; H, 5.10; N, 6.54.

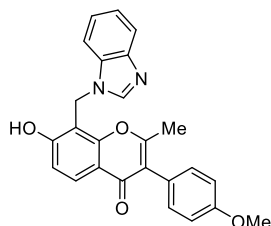

**8-(1*H*-Benzimidazol-1-ylmethyl)-7-hydroxy-3-(4-methoxyphenyl)-2-(trifluoromethyl)-4*H*-chromen-4-one (10g).** Off-white solid, yield 377 mg (81%); mp 288–290 °C; <sup>1</sup>H NMR (500 MHz, DMSO-*d*<sub>6</sub>) δ 11.89 (s, 1H), 8.24 (s, 1H), 7.93 (d, *J* = 8.7 Hz, 1H), 7.66 (d, *J* = 8.0 Hz, 1H), 7.61 (d, *J* = 7.9 Hz, 1H), 7.24–7.12 (m, 5H), 6.97 (d, *J* = 8.3 Hz, 2H), 5.59 (s, 2H), 3.77 ppm (s, 3H); <sup>13</sup>C NMR (126 MHz, DMSO-*d*<sub>6</sub>) δ 175.3, 161.9, 159.4, 154.7, 146.3 (d, *J* = 35.5 Hz), 144.5, 143.2, 133.6, 131.1, 127.3, 124.9, 122.4, 121.6, 121.0, 119.5, 119.5 (q, *J* = 276.7 Hz), 115.6, 115.6, 113.4, 110.2, 109.6, 55.1, 36.5 ppm; <sup>19</sup>F NMR (376 MHz, DMSO-*d*<sub>6</sub>) δ -62.7 ppm. MS (APCI): *m/z* 467.0 [M+H]<sup>+</sup>. Anal. calcd (%) for C<sub>25</sub>H<sub>17</sub>F<sub>3</sub>N<sub>2</sub>O<sub>4</sub>: C, 64.38; H, 3.67; N, 6.01. Found (%): C, 64.54; H, 3.91; N, 6.22.

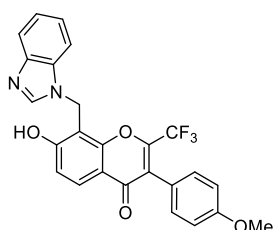

**8-(1*H*-Benzimidazol-1-ylmethyl)-7-hydroxy-3-[4-(trifluoromethoxy)phenyl]-4*H*-chromen-4-one (10h).** Off-white solid, yield 357 mg (79%); mp 293–295 °C; <sup>1</sup>H NMR (500 MHz, DMSO-*d*<sub>6</sub>) δ 11.57 (s, 1H), 8.60 (s, 1H), 8.33 (s, 1H), 7.98 (d, *J* = 8.8 Hz, 1H), 7.76–7.66 (m, 3H), 7.64–7.58 (m, 1H), 7.40 (d, *J* = 8.1 Hz, 2H), 7.22 (t, *J* = 7.6 Hz, 1H), 7.16 (t, *J* = 7.5 Hz, 1H), 7.09 (d, *J* = 8.8 Hz, 1H), 5.58 ppm (s, 2H); <sup>13</sup>C NMR (126 MHz, DMSO-*d*<sub>6</sub>) δ 174.2, 160.9, 155.7, 154.0, 148.0, 144.7, 143.1, 133.7, 131.2, 130.8, 127.1, 122.4, 122.4, 121.5, 120.7, 120.1 (q, *J* = 256.2 Hz), 119.4, 116.6, 114.8, 110.4, 109.7, 36.6 ppm; <sup>19</sup>F NMR (376 MHz, DMSO-*d*<sub>6</sub>) δ -57.2 ppm. MS (APCI): *m/z* 453.0 [M+H]<sup>+</sup>. Anal. calcd (%) for C<sub>24</sub>H<sub>15</sub>F<sub>3</sub>N<sub>2</sub>O<sub>4</sub>: C, 63.72; H, 3.34; N, 6.19. Found (%): C, 63.97; H, 3.09; N, 6.03.

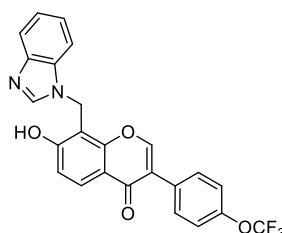

**7-Hydroxy-8-(1*H*-pyrazol-1-ylmethyl)-2*H*-chromen-2-one (11a).** Off-white solid, yield 176 mg (73%); mp 238–240 °C; <sup>1</sup>H NMR (400 MHz, DMSO-*d*<sub>6</sub>) δ 10.98 (s, 1H), 7.92 (d, *J* = 9.5 Hz, 1H), 7.64 (s, 1H), 7.51 (d, *J* = 8.4 Hz, 1H), 7.37 (s, 1H), 6.89 (d, *J* = 8.4 Hz, 1H), 6.22 (d, *J* = 9.5 Hz, 1H), 6.18 (s, 1H), 5.39 ppm (s, 2H); <sup>13</sup>C NMR (126 MHz, DMSO-*d*<sub>6</sub>) δ 160.1, 159.8, 153.8, 144.8, 138.4, 129.8, 129.4, 112.6, 111.3, 111.3, 109.8, 104.9, 43.0 ppm; MS (APCI): *m/z* 243.2 [M+H]<sup>+</sup>. Anal. calcd (%) for C<sub>13</sub>H<sub>10</sub>N<sub>2</sub>O<sub>3</sub>: C, 64.46; H, 4.16; N, 11.56. Found (%): C, 64.21; H, 4.37; N, 11.71.

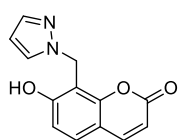

**7-Hydroxy-4-methyl-8-(1*H*-pyrazol-1-ylmethyl)-2*H*-chromen-2-one (11b).** Off-white solid, yield 173 mg (68%); mp 206–208 °C; <sup>1</sup>H NMR (400 MHz, DMSO-*d*<sub>6</sub>) δ 10.92 (s, 1H), 7.65–7.57 (m, 2H), 7.35 (d, *J* = 1.2 Hz, 1H), 6.91 (d, *J* = 8.8 Hz, 1H), 6.25–6.03 (m, 2H), 5.39 (s, 2H), 2.36 ppm (s, 3H); <sup>13</sup>C NMR (101 MHz, DMSO-*d*<sub>6</sub>) δ 159.9, 159.6, 153.8, 153.2, 138.3, 129.7, 126.3, 112.3, 112.1, 110.2, 109.7, 104.8, 43.1, 18.2 ppm; MS (APCI): *m/z* 257.0 [M+H]<sup>+</sup>. Anal. calcd (%) for C<sub>14</sub>H<sub>12</sub>N<sub>2</sub>O<sub>3</sub>: C, 65.62; H, 4.72; N, 10.93. Found (%): C, 65.41; H, 4.54; N, 11.07.

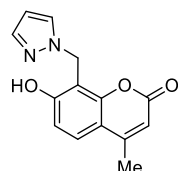

**7-Hydroxy-2,3-dimethyl-8-(1*H*-pyrazol-1-ylmethyl)-4*H*-chromen-4-one (11c).** Off-white solid, yield 176 mg (65%); mp 223–225 °C; <sup>1</sup>H NMR (400 MHz, DMSO-*d*<sub>6</sub>) δ 11.00 (s, 1H), 7.84 (d, *J* = 8.7 Hz, 1H), 7.71–7.63 (m, 1H), 7.39–7.33 (m, 1H), 6.97 (d, *J* = 8.7 Hz, 1H), 6.18 (t, *J* = 2.1 Hz, 1H), 5.43 (s, 2H), 2.33 (s, 3H), 1.87 ppm (s, 3H); <sup>13</sup>C NMR (126 MHz, DMSO-*d*<sub>6</sub>) δ 175.9, 161.2, 160.3, 155.3, 138.4, 129.9, 126.3, 115.3, 114.8, 113.9, 109.6, 104.9, 43.2, 18.1, 9.5 ppm; MS (APCI): *m/z* 271.0 [M+H]<sup>+</sup>. Anal. calcd (%) for C<sub>15</sub>H<sub>14</sub>N<sub>2</sub>O<sub>3</sub>: C, 66.66; H, 5.22; N, 10.36. Found (%): C, 66.39; H, 5.47; N, 10.59.

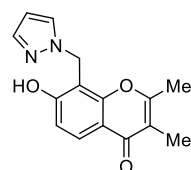

**7-Hydroxy-3-(4-hydroxyphenyl)-8-(1H-pyrazol-1-ylmethyl)-4H-chromen-4-one (11d).** Off-white solid, yield 271 mg (81%); mp 152–154 °C;

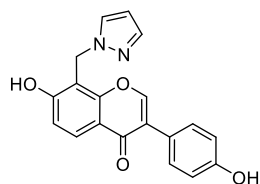

<sup>1</sup>H NMR (400 MHz, DMSO-*d*<sub>6</sub>) δ 11.16 (s, 1H), 9.48 (s, 1H), 8.35 (s, 1H), 7.99 (d, *J* = 8.8 Hz, 1H), 7.66 (d, *J* = 2.3 Hz, 1H), 7.43 – 7.34 (m, 3H), 7.08 (d, *J* = 8.9 Hz, 1H), 6.81 (d, *J* = 8.5 Hz, 2H), 6.19 (t, *J* = 2.1 Hz, 1H), 5.48 ppm (s, 2H); <sup>13</sup>C NMR (126 MHz, DMSO-*d*<sub>6</sub>) δ 174.8, 161.0, 157.2, 155.7, 152.7, 138.4, 130.1, 129.8, 127.0, 123.5, 122.4, 116.6, 115.0, 114.5, 109.9, 105.0, 43.1 ppm; MS (APCI): *m/z* 335.2 [M+H]<sup>+</sup>. Anal. calcd (%) for C<sub>19</sub>H<sub>14</sub>N<sub>2</sub>O<sub>4</sub>: C, 68.26; H, 4.22; N, 8.38. Found (%): C, 68.49; H, 4.03; N, 8.56.

**7-Hydroxy-3-(4-methoxyphenyl)-8-(1H-pyrazol-1-ylmethyl)-4H-chromen-4-one (11e).** Off-white solid, yield 279 mg (80%); mp 206–208 °C;

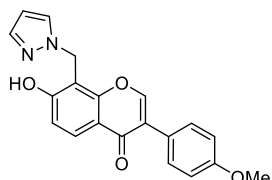

<sup>1</sup>H NMR (400 MHz, DMSO-*d*<sub>6</sub>) δ 11.22 (s, 1H), 8.42 (s, 1H), 8.00 (d, *J* = 8.8 Hz, 1H), 7.68 (d, *J* = 2.3 Hz, 1H), 7.51 (d, *J* = 8.4 Hz, 2H), 7.42 – 7.35 (m, 1H), 7.06 (d, *J* = 8.8 Hz, 1H), 6.98 (d, *J* = 8.4 Hz, 2H), 6.26 – 6.13 (m, 1H), 5.47 (s, 2H), 3.78 ppm (s, 3H); <sup>13</sup>C NMR (126 MHz, DMSO-*d*<sub>6</sub>) δ 174.7, 161.0, 159.0, 155.7, 153.1, 138.4, 130.1, 129.8, 127.0, 124.0, 123.1, 116.6, 114.5, 113.6, 109.9, 105.0, 55.1, 43.1 ppm; MS (APCI): *m/z* 349.2 [M+H]<sup>+</sup>. Anal. calcd (%) for C<sub>20</sub>H<sub>16</sub>N<sub>2</sub>O<sub>4</sub>: C, 68.96; H, 4.63; N, 8.04. Found (%): C, 69.13; H, 4.87; N, 8.23.

**3-(3,4-Dimethoxyphenyl)-7-hydroxy-8-(1H-pyrazol-1-ylmethyl)-4H-chromen-4-one (11f).** Off-white solid, yield 352 mg (93%); mp 140–142 °C;

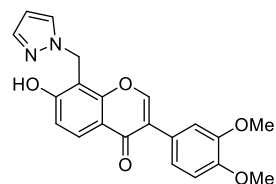

<sup>1</sup>H NMR (400 MHz, DMSO-*d*<sub>6</sub>) δ 11.21 (s, 1H), 8.45 (d, *J* = 4.1 Hz, 1H), 8.00 (d, *J* = 8.7 Hz, 1H), 7.68 (d, *J* = 2.3 Hz, 1H), 7.43 – 7.35 (m, 1H), 7.19 (d, *J* = 2.1 Hz, 1H), 7.14 (dd, *J* = 8.2, 2.0 Hz, 1H), 7.07 (d, *J* = 8.8 Hz, 1H), 6.99 (d, *J* = 8.2 Hz, 1H), 6.33 – 6.10 (m, 1H), 5.48 (s, 2H), 3.78 ppm (s, 6H); <sup>13</sup>C NMR (126 MHz, DMSO-*d*<sub>6</sub>) δ 174.7, 161.0, 155.7, 153.3, 148.6, 148.3, 138.4, 129.8, 127.0, 124.3, 123.2, 121.2, 116.6, 114.6, 112.7, 111.5, 109.9, 105.0, 55.5, 55.5, 43.1 ppm; MS (APCI): *m/z* 379.2 [M+H]<sup>+</sup>. Anal. calcd (%) for C<sub>21</sub>H<sub>18</sub>N<sub>2</sub>O<sub>5</sub>: C, 66.66; H, 4.80; N, 7.40. Found (%): C, 66.81; H, 4.97; N, 7.63.

**3-(1,3-Benzodioxol-5-yl)-7-hydroxy-8-(1H-pyrazol-1-ylmethyl)-4H-chromen-4-one (11g).** Off-white solid, yield 301 mg (83%); mp 246–248 °C;

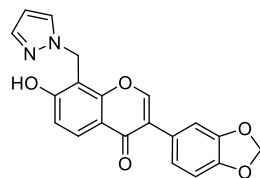

<sup>1</sup>H NMR (400 MHz, DMSO-*d*<sub>6</sub>) δ 11.23 (s, 1H), 8.43 (s, 1H), 7.99 (d, *J* = 8.8 Hz, 1H), 7.68 (d, *J* = 2.3 Hz, 1H), 7.38 (d, *J* = 1.8 Hz, 1H), 7.14 (d, *J* = 1.7 Hz, 1H), 7.09 – 7.02 (m, 2H), 6.96 (d, *J* = 8.0 Hz, 1H), 6.20 (t, *J* = 2.0 Hz, 1H), 6.04 (s, 2H), 5.47 ppm (s, 2H); <sup>13</sup>C NMR (126 MHz, DMSO-*d*<sub>6</sub>) δ 174.6, 161.0, 155.7, 153.3, 147.0, 146.9, 138.4, 129.8, 127.0, 125.5, 123.2, 122.4, 116.6, 114.6, 109.9, 109.4, 108.1, 105.0, 101.1, 43.1 ppm; MS (APCI): *m/z* 363.2 [M+H]<sup>+</sup>. Anal. calcd (%) for C<sub>20</sub>H<sub>14</sub>N<sub>2</sub>O<sub>5</sub>: C, 66.30; H, 3.89; N, 7.73. Found (%): C, 66.52; H, 3.65; N, 7.98.

**7-Hydroxy-3-(4-methoxyphenyl)-2-methyl-8-(1H-pyrazol-1-ylmethyl)-4H-chromen-4-one (11h).** Off-white solid, yield 261 mg (72%); mp

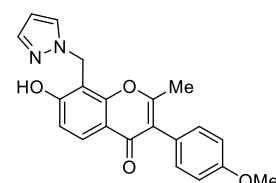

230–232 °C; <sup>1</sup>H NMR (400 MHz, DMSO-*d*<sub>6</sub>) δ 11.10 (s, 1H), 7.88 (d, *J* = 8.8 Hz, 1H), 7.74 (d, *J* = 2.0 Hz, 1H), 7.39 (d, *J* = 2.0 Hz, 1H), 7.19 (d, *J* = 8.7 Hz, 2H), 7.01 (d, *J* = 8.8 Hz, 1H), 6.97 (d, *J* = 8.7 Hz, 2H), 6.21 (t, *J* = 2.0 Hz, 1H), 5.50 (s, 2H), 3.79 (s, 3H), 2.25 ppm (s, 3H); <sup>13</sup>C NMR (101 MHz, DMSO-*d*<sub>6</sub>) δ 175.5, 162.8, 161.1, 159.0, 155.7, 138.9, 132.1, 130.4, 127.1, 125.5, 122.1, 116.0, 114.6, 113.9, 110.3, 105.3, 55.5, 43.6, 19.6 ppm; MS (APCI): *m/z* 363.2 [M+H]<sup>+</sup>. Anal. calcd (%) for C<sub>21</sub>H<sub>18</sub>N<sub>2</sub>O<sub>4</sub>: C, 69.60; H, 5.01; N, 7.73. Found (%): C, 69.84; H, 4.87; N, 7.95.

**7-Hydroxy-3-(4-methoxyphenyl)-8-(1H-pyrazol-1-ylmethyl)-2-(trifluoromethyl)-4H-chromen-4-one (11i).** Off-white solid, yield 278 mg (67%); mp 219–221 °C;

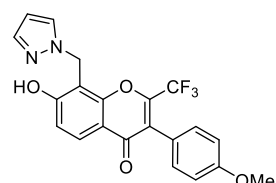

<sup>1</sup>H NMR (500 MHz, DMSO-*d*<sub>6</sub>) δ 11.50 (s, 1H), 7.94 (d, *J* = 8.8 Hz, 1H), 7.70 (d, *J* = 2.3 Hz, 1H), 7.42 – 7.36 (m, 1H), 7.20 (d, *J* = 8.2 Hz, 2H), 7.13 (d, *J* = 8.8 Hz, 1H), 6.99 (d, *J* = 8.2 Hz, 2H), 6.26 – 6.19 (m, 1H), 5.48 (s, 2H), 3.80 ppm (s, 3H); <sup>13</sup>C NMR (126 MHz, DMSO-*d*<sub>6</sub>) δ 175.4, 162.1, 159.4, 154.7, 146.4 (q, *J* = 34.9 Hz), 138.6, 131.2, 129.9, 127.1, 124.7, 121.1, 119.4 (q, *J* = 276.5 Hz), 115.6, 115.4, 113.4, 110.3, 105.0, 55.1, 43.0 ppm; <sup>19</sup>F NMR (376 MHz, DMSO-*d*<sub>6</sub>) δ -63.0 ppm. MS (APCI): *m/z* 417.0 [M+H]<sup>+</sup>. Anal. calcd (%) for C<sub>21</sub>H<sub>15</sub>F<sub>3</sub>N<sub>2</sub>O<sub>4</sub>: C, 60.58; H, 3.63; N, 6.73. Found (%): C, 60.43; H, 3.78; N, 6.58.

**7-Hydroxy-8-(1H-pyrazol-1-ylmethyl)-3-[4-(trifluoromethoxy)phenyl]-4H-chromen-4-one (11j).** Off-white solid, yield 361 mg (90%); mp

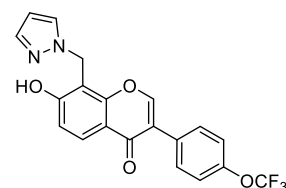

190–192 °C; <sup>1</sup>H NMR (500 MHz, DMSO-*d*<sub>6</sub>) δ 11.28 (s, 1H), 8.55 (s, 1H), 8.01 (d, *J* = 8.8 Hz, 1H), 7.71 (d, *J* = 8.8 Hz, 2H), 7.69 (d, *J* = 2.8 Hz, 1H), 7.42 (d, *J* = 8.2 Hz, 2H), 7.39 (d, *J* = 1.8 Hz, 1H), 7.08 (d, *J* = 8.8 Hz, 1H), 6.23 – 6.18 (m, 1H), 5.48 ppm (s, 2H); <sup>13</sup>C NMR (126 MHz, DMSO-*d*<sub>6</sub>) δ 174.3, 161.2, 155.8, 154.2, 147.9, 138.4, 131.3, 130.9, 129.8, 127.0, 122.3, 120.7, 120.1 (q, *J* = 256.4 Hz), 116.5, 114.8, 110.1, 105.0, 43.1 ppm; <sup>19</sup>F NMR (376 MHz, DMSO-*d*<sub>6</sub>) δ -57.2 ppm. MS (APCI): *m/z* 403.0 [M+H]<sup>+</sup>. Anal. calcd (%) for C<sub>20</sub>H<sub>13</sub>F<sub>3</sub>N<sub>2</sub>O<sub>4</sub>: C, 59.71; H, 3.26; N, 6.96. Found (%): C, 59.45; H, 3.07; N, 7.03.

**8-[(3,5-Dimethyl-1H-pyrazol-1-yl)methyl]-7-hydroxy-2H-chromen-2-one (12a).** Off-white solid, yield 213 mg (79%); mp 189–191°C; <sup>1</sup>H NMR (400 MHz, DMSO-*d*<sub>6</sub>) δ 10.94 (s, 1H), 7.91 (d, *J* = 9.4 Hz, 1H), 7.47 (d, *J* = 8.4 Hz, 1H), 6.83 (d, *J* = 8.4 Hz, 1H), 6.19 (d, *J* = 9.4 Hz, 1H), 5.71 (s, 1H), 5.14 (s, 2H), 2.38 (s, 3H), 1.95 ppm (s, 3H); <sup>13</sup>C NMR (101 MHz, DMSO-*d*<sub>6</sub>) δ 160.1, 159.9, 153.6, 145.9, 144.9, 139.5, 129.0, 113.1, 111.3, 111.3, 110.9, 104.1, 38.9, 13.3, 10.8 ppm; MS (APCI): *m/z* 271.2 [M+H]<sup>+</sup>. Anal. calcd (%) for C<sub>15</sub>H<sub>14</sub>N<sub>2</sub>O<sub>3</sub>: C, 66.66; H, 5.22; N, 10.36. Found (%): C, 66.81; H, 5.43; N, 10.09.

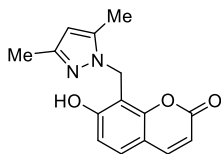

**8-[(3,5-Dimethyl-1H-pyrazol-1-yl)methyl]-7-hydroxy-2,3-dimethyl-4H-chromen-4-one (12b).** Off-white solid, yield 206 mg (69%); mp 233–235 °C; <sup>1</sup>H NMR (500 MHz, DMSO-*d*<sub>6</sub>+ CF<sub>3</sub>SO<sub>3</sub>H) δ 7.84 (d, *J* = 8.8 Hz, 1H), 6.92 (d, *J* = 8.8 Hz, 1H), 6.35 (s, 1H), 5.52 (s, 2H), 2.30 (s, 3H), 2.26 (s, 3H), 2.24 (s, 3H), 1.82 ppm (s, 3H); <sup>13</sup>C NMR (126 MHz, DMSO-*d*<sub>6</sub>+CF<sub>3</sub>SO<sub>3</sub>H) δ 176.5, 162.0, 161.2, 155.9, 146.6, 145.2, 128.1, 116.2, 115.5, 114.5, 108.0, 106.3, 42.1, 18.4, 11.3, 11.2, 10.1 ppm; MS (APCI): *m/z* 299.2 [M+H]<sup>+</sup>. Anal. calcd (%) for C<sub>17</sub>H<sub>18</sub>N<sub>2</sub>O<sub>3</sub>: C, 68.44; H, 6.08; N, 9.39. Found (%): C, 68.67; H, 6.26; N, 9.51.

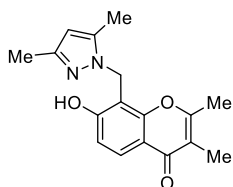

**8-[(3,5-Dimethyl-1H-pyrazol-1-yl)methyl]-7-hydroxy-3-(4-hydroxyphenyl)-4H-chromen-4-one (12c).** Off-white solid, yield 260 mg (72%); mp 264–266 °C; <sup>1</sup>H NMR (400 MHz, DMSO-*d*<sub>6</sub>) δ 11.07 (s, 1H), 9.57 (s, 1H), 8.37 (s, 1H), 7.95 (d, *J* = 8.7 Hz, 1H), 7.39 (d, *J* = 8.6 Hz, 2H), 7.00 (d, *J* = 8.7 Hz, 1H), 6.80 (d, *J* = 8.6 Hz, 2H), 5.75 (s, 1H), 5.24 (s, 2H), 2.37 (s, 3H), 1.99 ppm (s, 3H); <sup>13</sup>C NMR (126 MHz, DMSO-*d*<sub>6</sub>) δ 174.8, 161.0, 157.2, 155.6, 152.7, 145.9, 139.4, 130.1, 126.5, 123.4, 122.4, 116.6, 115.0, 114.8, 110.8, 104.2, 39.8, 13.4, 10.8 ppm; MS (APCI): *m/z* 363.0 [M+H]<sup>+</sup>. Anal. calcd (%) for C<sub>21</sub>H<sub>18</sub>N<sub>2</sub>O<sub>4</sub>: C, 69.60; H, 5.01; N, 7.73. Found (%): C, 69.34; H, 5.25; N, 7.86.

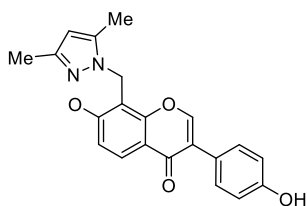

**8-[(3,5-Dimethyl-1H-pyrazol-1-yl)methyl]-7-hydroxy-3-(4-methoxyphenyl)-4H-chromen-4-one (12d).** Off-white solid, yield 286 mg (76%); mp 228–229°C; <sup>1</sup>H NMR (400 MHz, DMSO-*d*<sub>6</sub>) δ 11.18 (s, 1H), 8.45 (s, 1H), 7.97 (d, *J* = 8.8 Hz, 1H), 7.52 (d, *J* = 8.8 Hz, 2H), 7.02 (d, *J* = 8.8 Hz, 1H), 6.99 (d, *J* = 8.8 Hz, 2H), 5.76 (s, 1H), 5.25 (s, 2H), 3.78 (s, 3H), 2.39 (s, 3H), 1.99 ppm (s, 3H); <sup>13</sup>C NMR (101 MHz, DMSO-*d*<sub>6</sub>) δ 174.7, 160.9, 159.0, 155.6, 153.0, 145.9, 139.3, 130.1, 126.5, 124.1, 123.0, 116.6, 114.8, 113.6, 110.9, 104.2, 55.1, 39.7, 13.3, 10.8 ppm; MS (APCI): *m/z* 377.2 [M+H]<sup>+</sup>. Anal. calcd (%) for C<sub>22</sub>H<sub>20</sub>N<sub>2</sub>O<sub>4</sub>: C, 70.20; H, 5.36; N, 7.44. Found (%): C, 70.02; H, 5.11; N, 7.18.

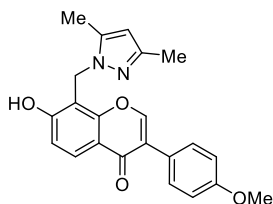

**3-(1,3-Benzodioxol-5-yl)-8-[(3,5-dimethyl-1H-pyrazol-1-yl)methyl]-7-hydroxy-4H-chromen-4-one (12e).** Off-white solid, yield 292 mg (72%); mp 172–173°C; <sup>1</sup>H NMR (400 MHz, DMSO-*d*<sub>6</sub>) δ 11.19 (s, 1H), 8.48 (s, 1H), 7.97 (d, *J* = 8.8 Hz, 1H), 7.19 (d, *J* = 1.9 Hz, 1H), 7.15 (dd, *J* = 8.3, 1.9 Hz, 1H), 7.05–6.94 (m, 2H), 5.77 (s, 1H), 5.25 (s, 2H), 3.78 (s, 6H), 2.39 (s, 3H), 1.99 ppm (s, 3H); <sup>13</sup>C NMR (101 MHz, DMSO-*d*<sub>6</sub>) δ 174.8, 161.0, 155.6, 153.4, 148.6, 148.3, 145.9, 139.4, 126.6, 124.4, 123.2, 121.3, 116.7, 114.9, 112.6, 111.5, 110.9, 104.3, 55.6, 55.5, 39.8, 13.4, 10.9 ppm; MS (APCI): *m/z* 407.2 [M+H]<sup>+</sup>. Anal. calcd (%) for C<sub>23</sub>H<sub>22</sub>N<sub>2</sub>O<sub>5</sub>: C, 67.97; H, 5.46; N, 6.89. Found (%): C, 67.81; H, 5.59; N, 7.12.

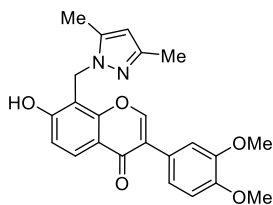

**3-(1,3-Benzodioxol-5-yl)-8-[(3,5-dimethyl-1H-pyrazol-1-yl)methyl]-7-hydroxy-4H-chromen-4-one (12f).** Off-white solid, yield 292 mg (75%); mp 223–225 °C; <sup>1</sup>H NMR (500 MHz, DMSO-*d*<sub>6</sub>) δ 11.16 (s, 1H), 8.43 (s, 1H), 7.96 (d, *J* = 8.9 Hz, 1H), 7.14 (s, 1H), 7.06 (d, *J* = 8.1 Hz, 1H), 7.01 (d, *J* = 8.9 Hz, 1H), 6.96 (d, *J* = 8.1 Hz, 1H), 6.04 (s, 2H), 5.76 (s, 1H), 5.24 (s, 2H), 2.37 (s, 3H), 1.99 ppm (s, 3H); <sup>13</sup>C NMR (126 MHz, DMSO-*d*<sub>6</sub>) δ 174.6, 161.0, 155.6, 153.3, 147.0, 146.9, 145.9, 139.4, 126.5, 125.6, 123.0, 122.4, 116.6, 114.9, 110.9, 109.4, 108.1, 104.2, 101.0, 39.6, 13.3, 10.8 ppm; MS (APCI): *m/z* 391.2 [M+H]<sup>+</sup>. Anal. calcd (%) for C<sub>22</sub>H<sub>18</sub>N<sub>2</sub>O<sub>5</sub>: C, 67.69; H, 4.65; N, 7.18. Found (%): C, 67.83; H, 4.87; N, 7.02.

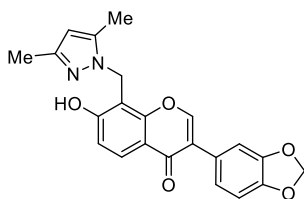

**8-[(3,5-Dimethyl-1H-pyrazol-1-yl)methyl]-7-hydroxy-3-(4-methoxyphenyl)-2-methyl-4H-chromen-4-one (12g).** Off-white solid, yield 300 mg (77%); mp 210–212°C; <sup>1</sup>H NMR (400 MHz, DMSO-*d*<sub>6</sub>) δ 11.13 (s, 1H), 7.86 (d, *J* = 8.7 Hz, 1H), 7.18 (d, *J* = 8.6 Hz, 2H), 7.01–6.95 (m, 3H), 5.79 (s, 1H), 5.31 (s, 2H), 3.79 (s, 3H), 2.36 (s, 3H), 2.23 (s, 3H), 2.03 ppm (s, 3H); <sup>13</sup>C NMR (101 MHz, DMSO-*d*<sub>6</sub>) δ 175.0, 162.2, 160.7, 158.5, 155.1, 145.8, 139.3, 131.6, 126.3, 125.1, 121.6, 115.6, 114.6, 113.5, 110.5, 104.3, 55.1, 19.0, 13.2, 10.8 ppm; MS (APCI): *m/z* 391.2 [M+H]<sup>+</sup>. Anal. calcd (%) for C<sub>23</sub>H<sub>22</sub>N<sub>2</sub>O<sub>4</sub>: C, 70.75; H, 5.68; N, 7.17. Found (%): C, 70.98; H, 5.42; N, 7.03.

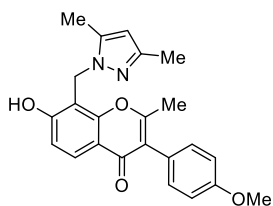

**8-[(3,5-Dimethyl-1H-pyrazol-1-yl)methyl]-7-hydroxy-3-(4-methoxyphenyl)-2-(trifluoromethyl)-4H-chromen-4-one (12h).** Off-white solid, yield 356 mg (80%); mp 201–203 °C; <sup>1</sup>H NMR (400 MHz, DMSO-*d*<sub>6</sub>) δ 11.61 (s, 1H), 7.94 (d, *J* = 8.8 Hz, 1H), 7.20 (d, *J* = 8.4 Hz, 2H), 7.10 (d, *J* = 8.8 Hz, 1H), 7.00 (d, *J* = 8.4 Hz, 2H), 5.80 (s, 1H), 5.28 (s, 2H), 3.80 (s, 3H), 2.35 (s, 3H), 2.02 ppm (s, 3H); <sup>13</sup>C NMR (126 MHz, DMSO-*d*<sub>6</sub>) δ 175.3, 162.2, 159.4, 154.4, 146.4 (q, *J* = 35.0 Hz), 145.9, 139.2, 131.1, 126.7, 124.5, 121.1, 119.4 (q, *J* = 276.4 Hz), 116.1, 115.5, 113.4, 110.9, 104.3, 55.1, 39.9, 13.2, 10.4 ppm; <sup>19</sup>F NMR (376 MHz, DMSO-*d*<sub>6</sub>) δ -63.0 ppm. MS (APCI): *m/z* 445.0 [M+H]<sup>+</sup>. Anal. calcd (%) for C<sub>23</sub>H<sub>19</sub>F<sub>3</sub>N<sub>2</sub>O<sub>4</sub>: C, 62.16; H, 4.31; N, 6.30. Found (%): C, 62.31; H, 4.52; N, 6.45.

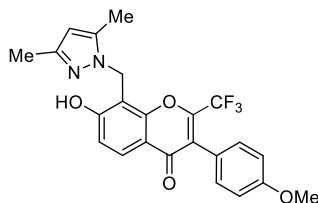

**8-[(3,5-Dimethyl-1H-pyrazol-1-yl)methyl]-7-hydroxy-3-[4-(trifluoromethoxy)phenyl]-4H-chromen-4-one (12i).** Off-white solid, yield 349 mg (81%); mp 231–233 °C; <sup>1</sup>H NMR (500 MHz, DMSO-*d*<sub>6</sub>) δ 11.22 (s, 1H), 8.53 (s, 1H), 7.96 (d, *J* = 8.8 Hz, 1H), 7.70 (d, *J* = 8.7 Hz, 2H), 7.40 (d, *J* = 8.7 Hz, 2H), 7.02 (d, *J* = 8.8 Hz, 1H), 5.74 (s, 1H), 5.23 (s, 2H), 2.36 (s, 3H), 1.98 ppm (s, 3H); <sup>13</sup>C NMR (126 MHz, DMSO-*d*<sub>6</sub>) δ 174.3, 161.2, 155.7, 154.1, 147.9, 145.9, 139.4, 131.3, 130.8, 126.5, 122.2, 120.7, 120.1 (q, *J* = 256.1 Hz), 116.5, 115.0, 111.0, 104.2, 39.7, 13.3, 10.8 ppm; <sup>19</sup>F NMR (376 MHz, DMSO-*d*<sub>6</sub>) δ -57.3 ppm. MS (APCI): *m/z* 431.0 [M+H]<sup>+</sup>. Anal. calcd (%) for C<sub>22</sub>H<sub>17</sub>F<sub>3</sub>N<sub>2</sub>O<sub>4</sub>: C, 61.40; H, 3.98; N, 6.51. Found (%): C, 61.13; H, 4.17; N, 6.72.

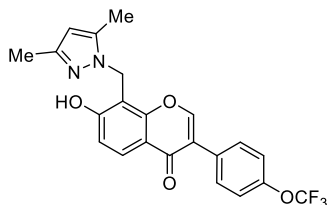

**7-Hydroxy-8-(1H-indazol-1-ylmethyl)-2H-chromen-2-one (13a).** Off-white solid, yield 30 mg (10%); mp 227–229 °C; <sup>1</sup>H NMR (600 MHz, DMSO-*d*<sub>6</sub>) δ 10.87 (s, 1H), 7.97 (s, 1H), 7.94 (d, *J* = 9.4 Hz, 1H), 7.83 (d, *J* = 8.5 Hz, 1H), 7.71 (d, *J* = 8.0 Hz, 1H), 7.52 (d, *J* = 8.5 Hz, 1H), 7.42–7.35 (m, 1H), 7.11 (t, *J* = 7.4 Hz, 1H), 6.86 (d, *J* = 8.5 Hz, 1H), 6.22 (d, *J* = 9.5 Hz, 1H), 5.66 ppm (s, 2H); <sup>13</sup>C NMR (151 MHz, DMSO-*d*<sub>6</sub>) δ 160.0, 159.9, 154.0, 144.8, 139.4, 132.6, 129.2, 125.7, 123.3, 120.5, 120.2, 112.5, 111.3, 110.2, 110.2, 40.2 ppm. MS (APCI): *m/z* 293.0 [M+H]<sup>+</sup>. Anal. calcd (%) for C<sub>17</sub>H<sub>12</sub>N<sub>2</sub>O<sub>3</sub>: C, 69.86; H, 4.14; N, 9.58. Found (%): C, 70.07; H, 3.97; N, 9.51.

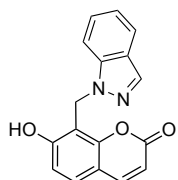

**7-Hydroxy-8-(1H-indazol-1-ylmethyl)-3-(4-methoxyphenyl)-4H-chromen-4-one (13b).** Off-white solid, yield 80 mg (20%); mp 196–198 °C; <sup>1</sup>H NMR (400 MHz, DMSO-*d*<sub>6</sub>) δ 11.14 (s, 1H), 8.36 (s, 1H), 7.96 (d, *J* = 0.9 Hz, 1H), 7.95 (d, *J* = 8.8 Hz, 1H), 7.83–7.78 (m, 1H), 7.72–7.66 (m, 1H), 7.47 (d, *J* = 8.9 Hz, 2H), 7.41–7.33 (m, 1H), 7.12–7.06 (m, 1H), 7.00 (d, *J* = 8.8 Hz, 1H), 6.95 (d, *J* = 8.9 Hz, 2H), 5.71 (s, 2H), 3.75 ppm (s, 3H); <sup>13</sup>C NMR (100 MHz, DMSO-*d*<sub>6</sub>) δ 174.7, 160.9, 159.0, 156.0, 153.0, 139.5, 132.7, 130.1, 126.8, 125.9, 124.0, 123.3, 123.2, 120.6, 120.3, 116.6, 114.5, 113.6, 110.3, 110.1, 55.1, 40.4 ppm. MS (APCI): *m/z* 399.0 [M+H]<sup>+</sup>. Anal. calcd (%) for C<sub>24</sub>H<sub>18</sub>N<sub>2</sub>O<sub>4</sub>: C, 72.35; H, 4.55; N, 7.03. Found (%): C, 72.23; H, 4.77; N, 6.72.

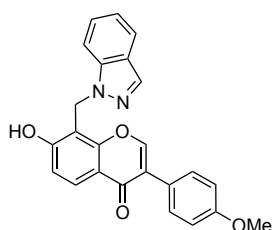

**7-Hydroxy-8-(2H-indazol-2-ylmethyl)-2H-chromen-2-one (14a).** Off-white solid, yield 195 mg (67%); mp 223–225 °C; <sup>1</sup>H NMR (600 MHz, DMSO-*d*<sub>6</sub>) δ 11.05 (s, 1H), 8.28 (s, 1H), 7.97 (d, *J* = 9.2 Hz, 1H), 7.66 (d, *J* = 8.4 Hz, 1H), 7.58 (d, *J* = 8.5 Hz, 1H), 7.55 (d, *J* = 8.8 Hz, 1H), 7.19 (dd, *J* = 8.8, 6.5 Hz, 1H), 7.02–6.96 (m, 1H), 6.93 (d, *J* = 8.5 Hz, 1H), 6.25 (d, *J* = 9.6 Hz, 1H), 5.73 ppm (s, 2H); <sup>13</sup>C NMR (151 MHz, DMSO-*d*<sub>6</sub>) δ 160.0, 159.9, 153.9, 147.8, 144.8, 129.8, 125.3, 123.7, 121.1, 120.8, 120.5, 116.9, 112.7, 111.4, 111.4, 109.1, 44.7 ppm. MS (APCI): *m/z* 293.2 [M+H]<sup>+</sup>. Anal. calcd (%) for C<sub>17</sub>H<sub>12</sub>N<sub>2</sub>O<sub>3</sub>: C, 69.86; H, 4.14; N, 9.58. Found (%): C, 69.66; H, 4.07; N, 9.73.

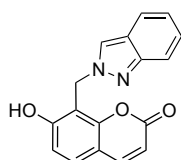

**7-Hydroxy-8-(2H-indazol-2-ylmethyl)-3-(4-methoxyphenyl)-4H-chromen-4-one (14b).** Off-white solid, yield 178 mg (45%); mp 191–193 °C; <sup>1</sup>H NMR (400 MHz, DMSO-*d*<sub>6</sub>) δ 11.32 (s, 1H), 8.44 (s, 1H), 8.32 (s, 1H), 8.04 (d, *J* = 8.8 Hz, 1H), 7.68–7.63 (m, 1H), 7.56 (d, *J* = 8.8 Hz, 1H), 7.51 (d, *J* = 8.7 Hz, 2H), 7.24–7.16 (m, 1H), 7.09 (d, *J* = 8.8 Hz, 1H), 7.03–6.94 (m, 3H), 5.80 (s, 2H), 3.78 ppm (s, 3H); <sup>13</sup>C NMR (100 MHz, DMSO-*d*<sub>6</sub>) δ 174.7, 161.2, 159.0, 155.9, 153.1, 147.9, 130.1, 127.4, 125.4, 124.0, 123.8, 123.2, 121.3, 120.9, 120.6, 116.9, 116.7, 114.6, 113.6, 109.3, 55.1, 44.8 ppm. MS (APCI): *m/z* 399.2 [M+H]<sup>+</sup>. Anal. calcd (%) for C<sub>24</sub>H<sub>18</sub>N<sub>2</sub>O<sub>4</sub>: C, 72.35; H, 4.55; N, 7.03. Found (%): C, 72.64; H, 4.82; N, 7.18.

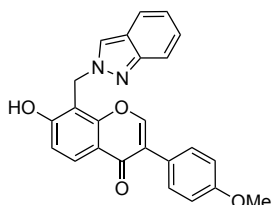

1. M. Ogata, H. Matsumoto, K. Takahashi, S. Shimizu, S. Kida, M. Ueda, S. Kimoto and M. Haruna, *J. Med. Chem.*, 1984, **27**, 1142–1149.
2. M. Ogata and H. Matsumoto, *Synth. Commun.*, 1980, **10**, 559–567.
3. S. González-Pelayo and L. A. López, *Eur. J. Org. Chem.*, 2017, **2017**, 6003–6007.
4. G. Wu, Z. Yang, X. Xu, L. Hao, L. Chen, Y. Wang and Y. Ji, *Org. Lett.*, 2022, **24**, 3570–3575.
5. S. Ahmed, I. Shahid, S. Dhanani and C. P. Owen, *Bioorg. Med. Chem. Lett.*, 2009, **19**, 4698–4701.

10.03

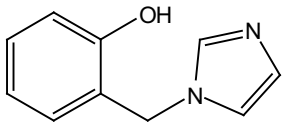

7.70  
7.15  
7.13  
7.11  
7.03  
7.01  
6.89  
6.87  
6.85  
6.78  
6.76  
6.74

5.09

<sup>1</sup>H NMR spectrum of compound **4a** in DMSO-*d*<sub>6</sub>

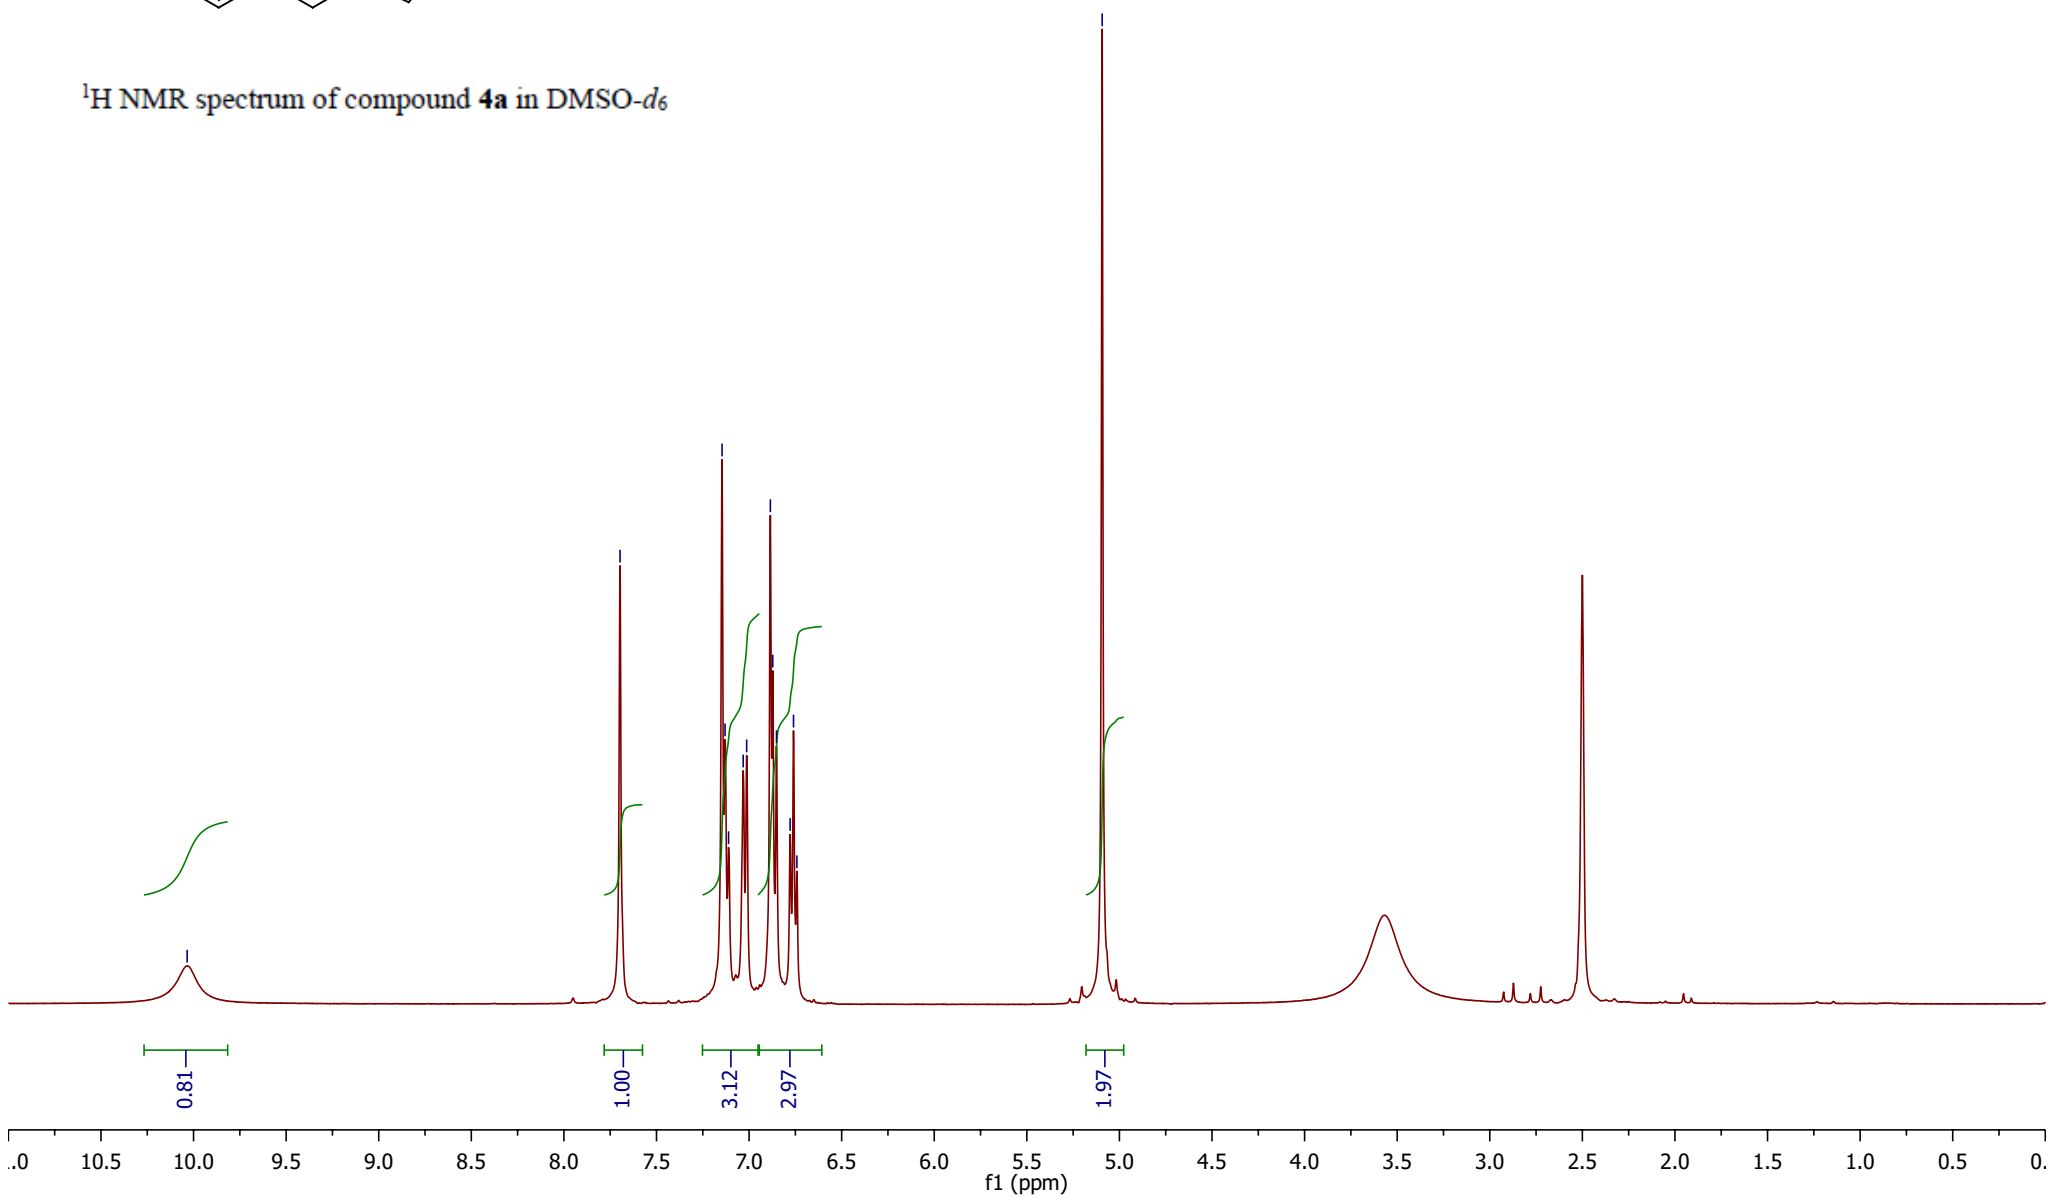

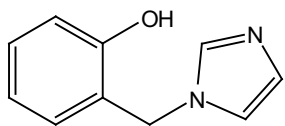

<sup>13</sup>C NMR spectrum of compound 4a in DMSO-*d*<sub>6</sub>

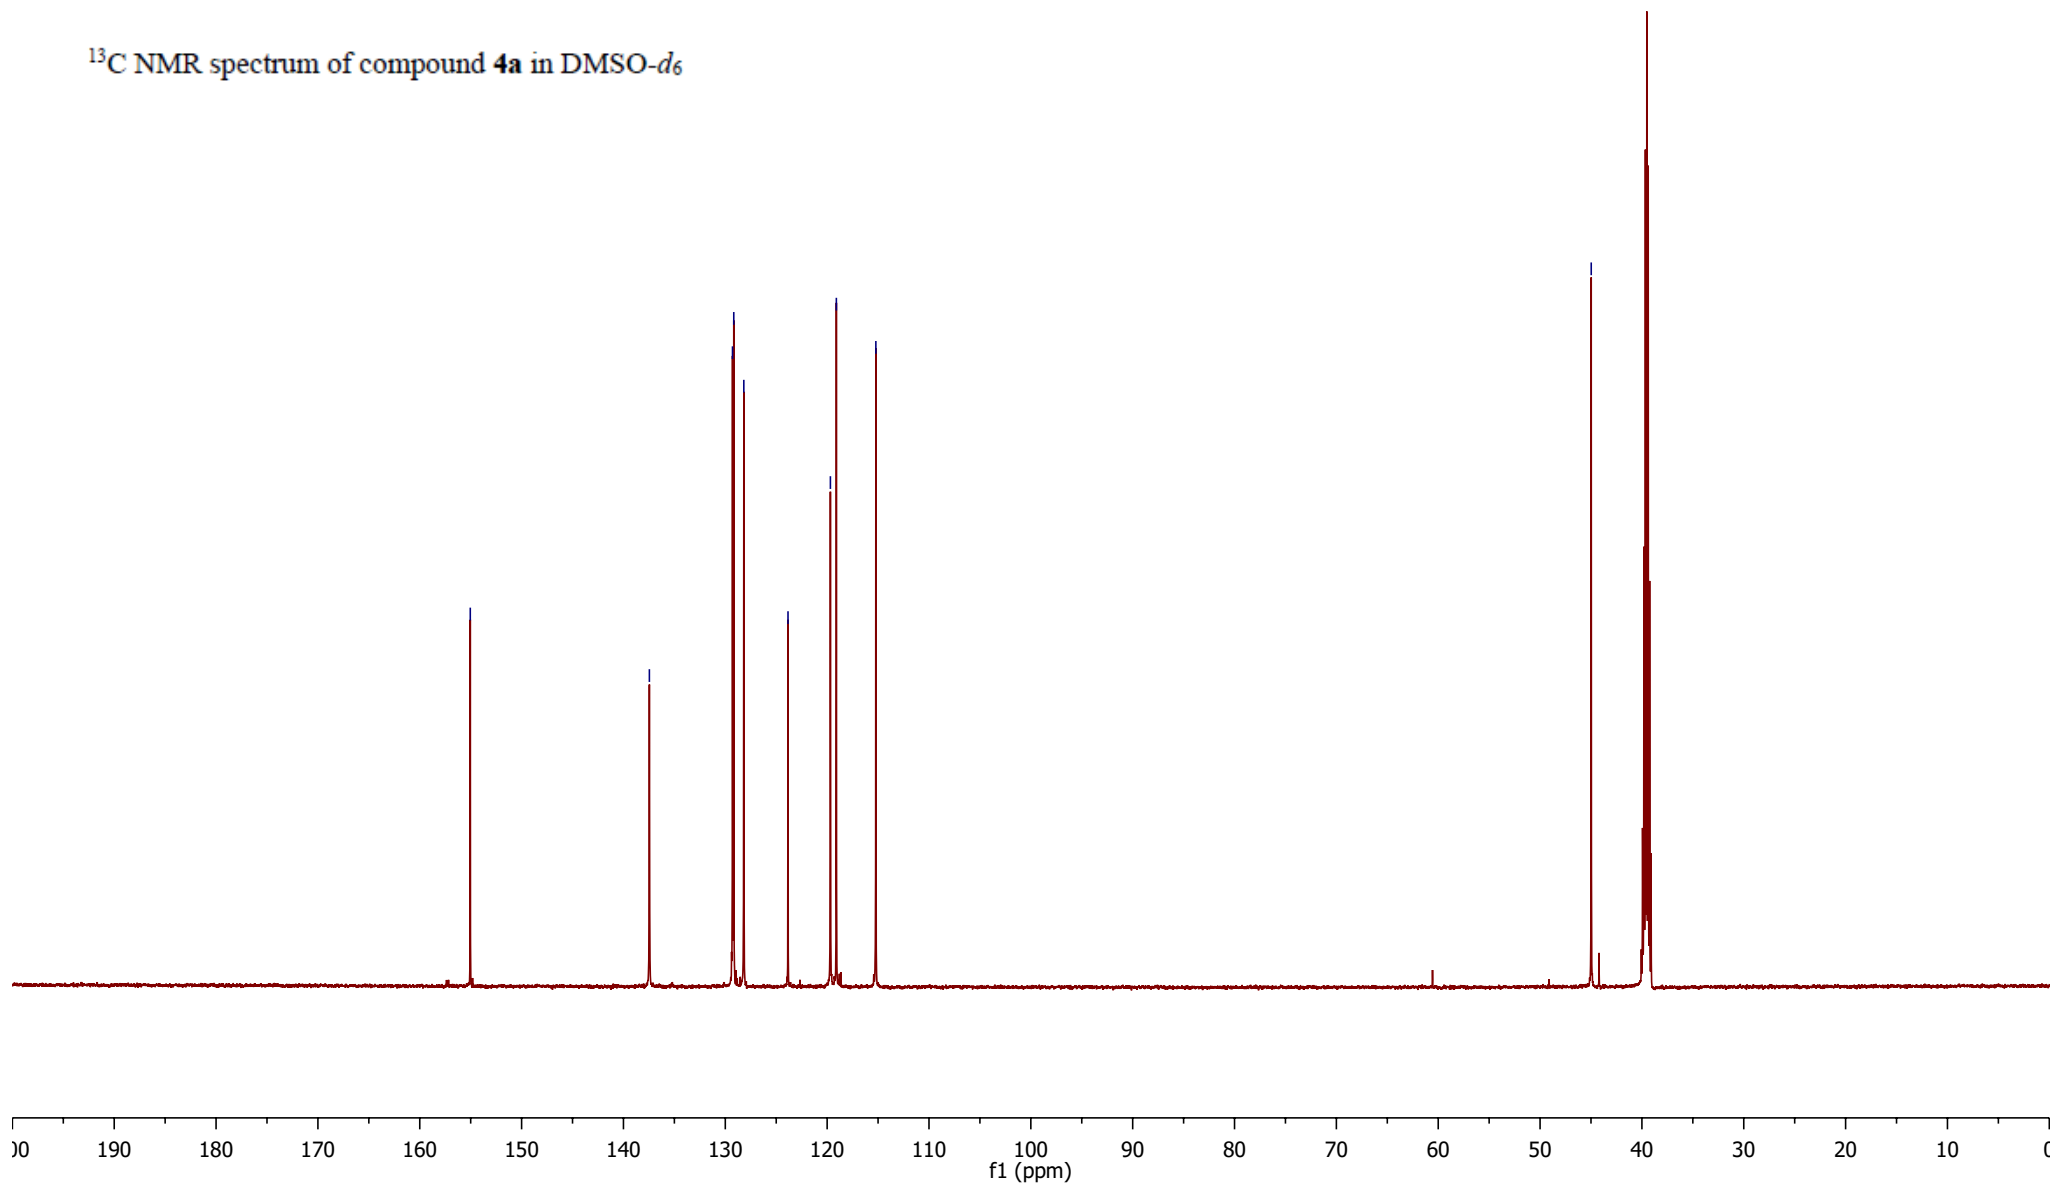



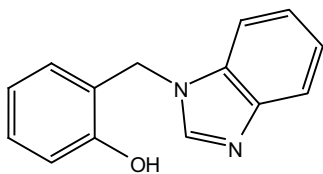

$^1\text{H}$  NMR spectrum of compound **4b** in  $\text{DMSO-}d_6$

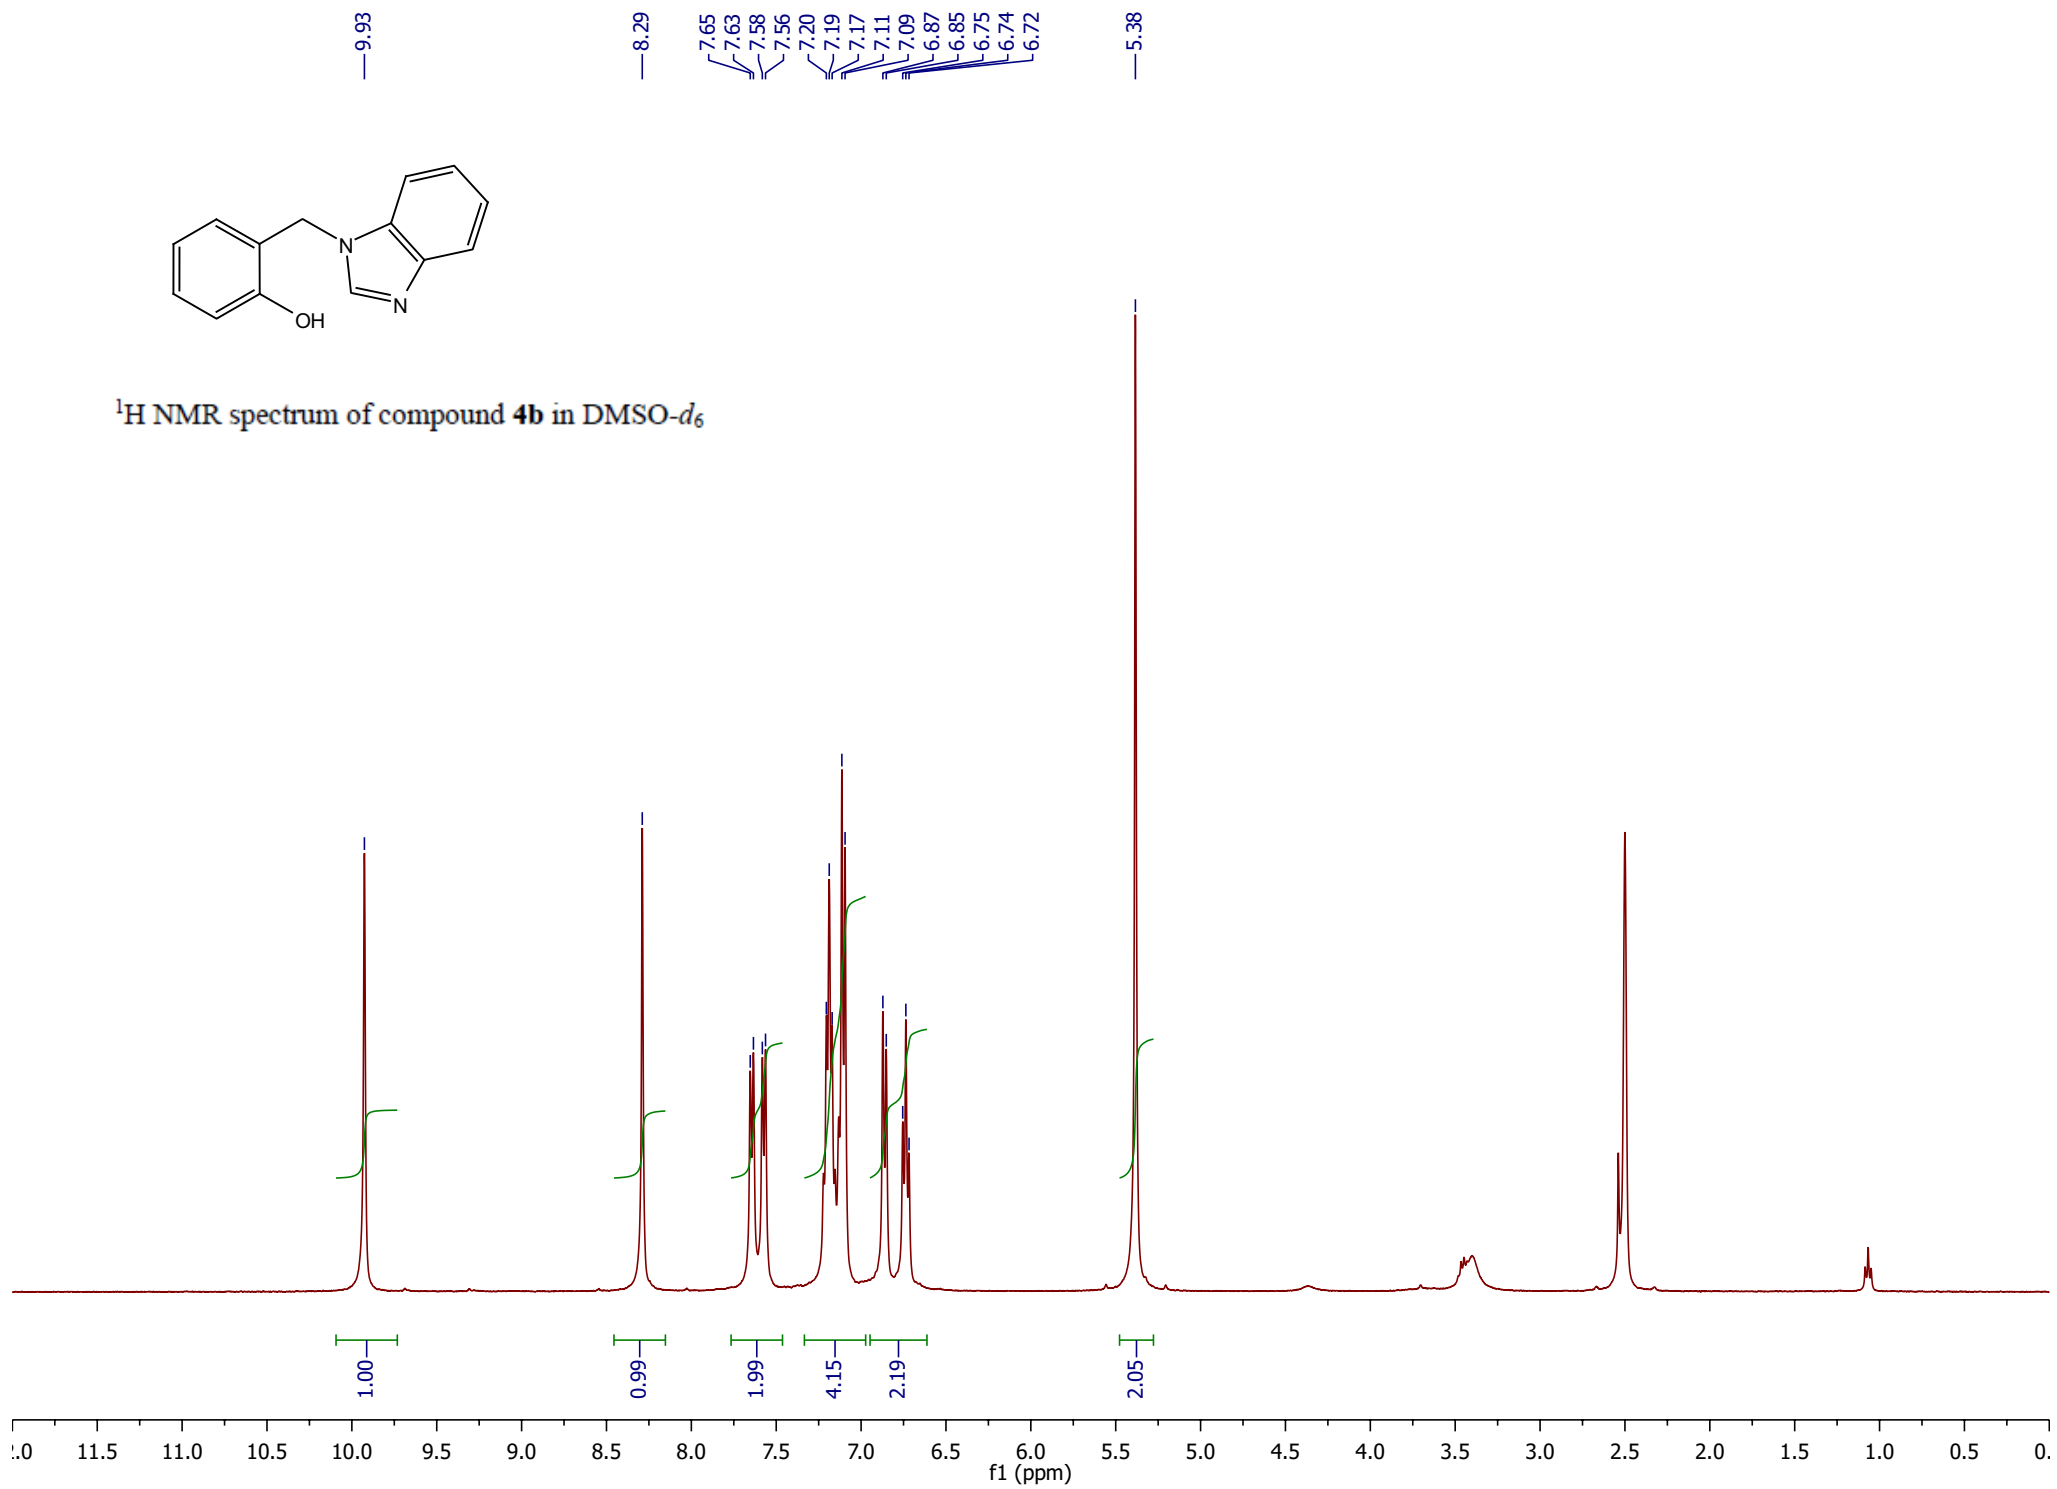



$^{13}\text{C}$  NMR spectrum of compound **4b** in  $\text{DMSO-}d_6$

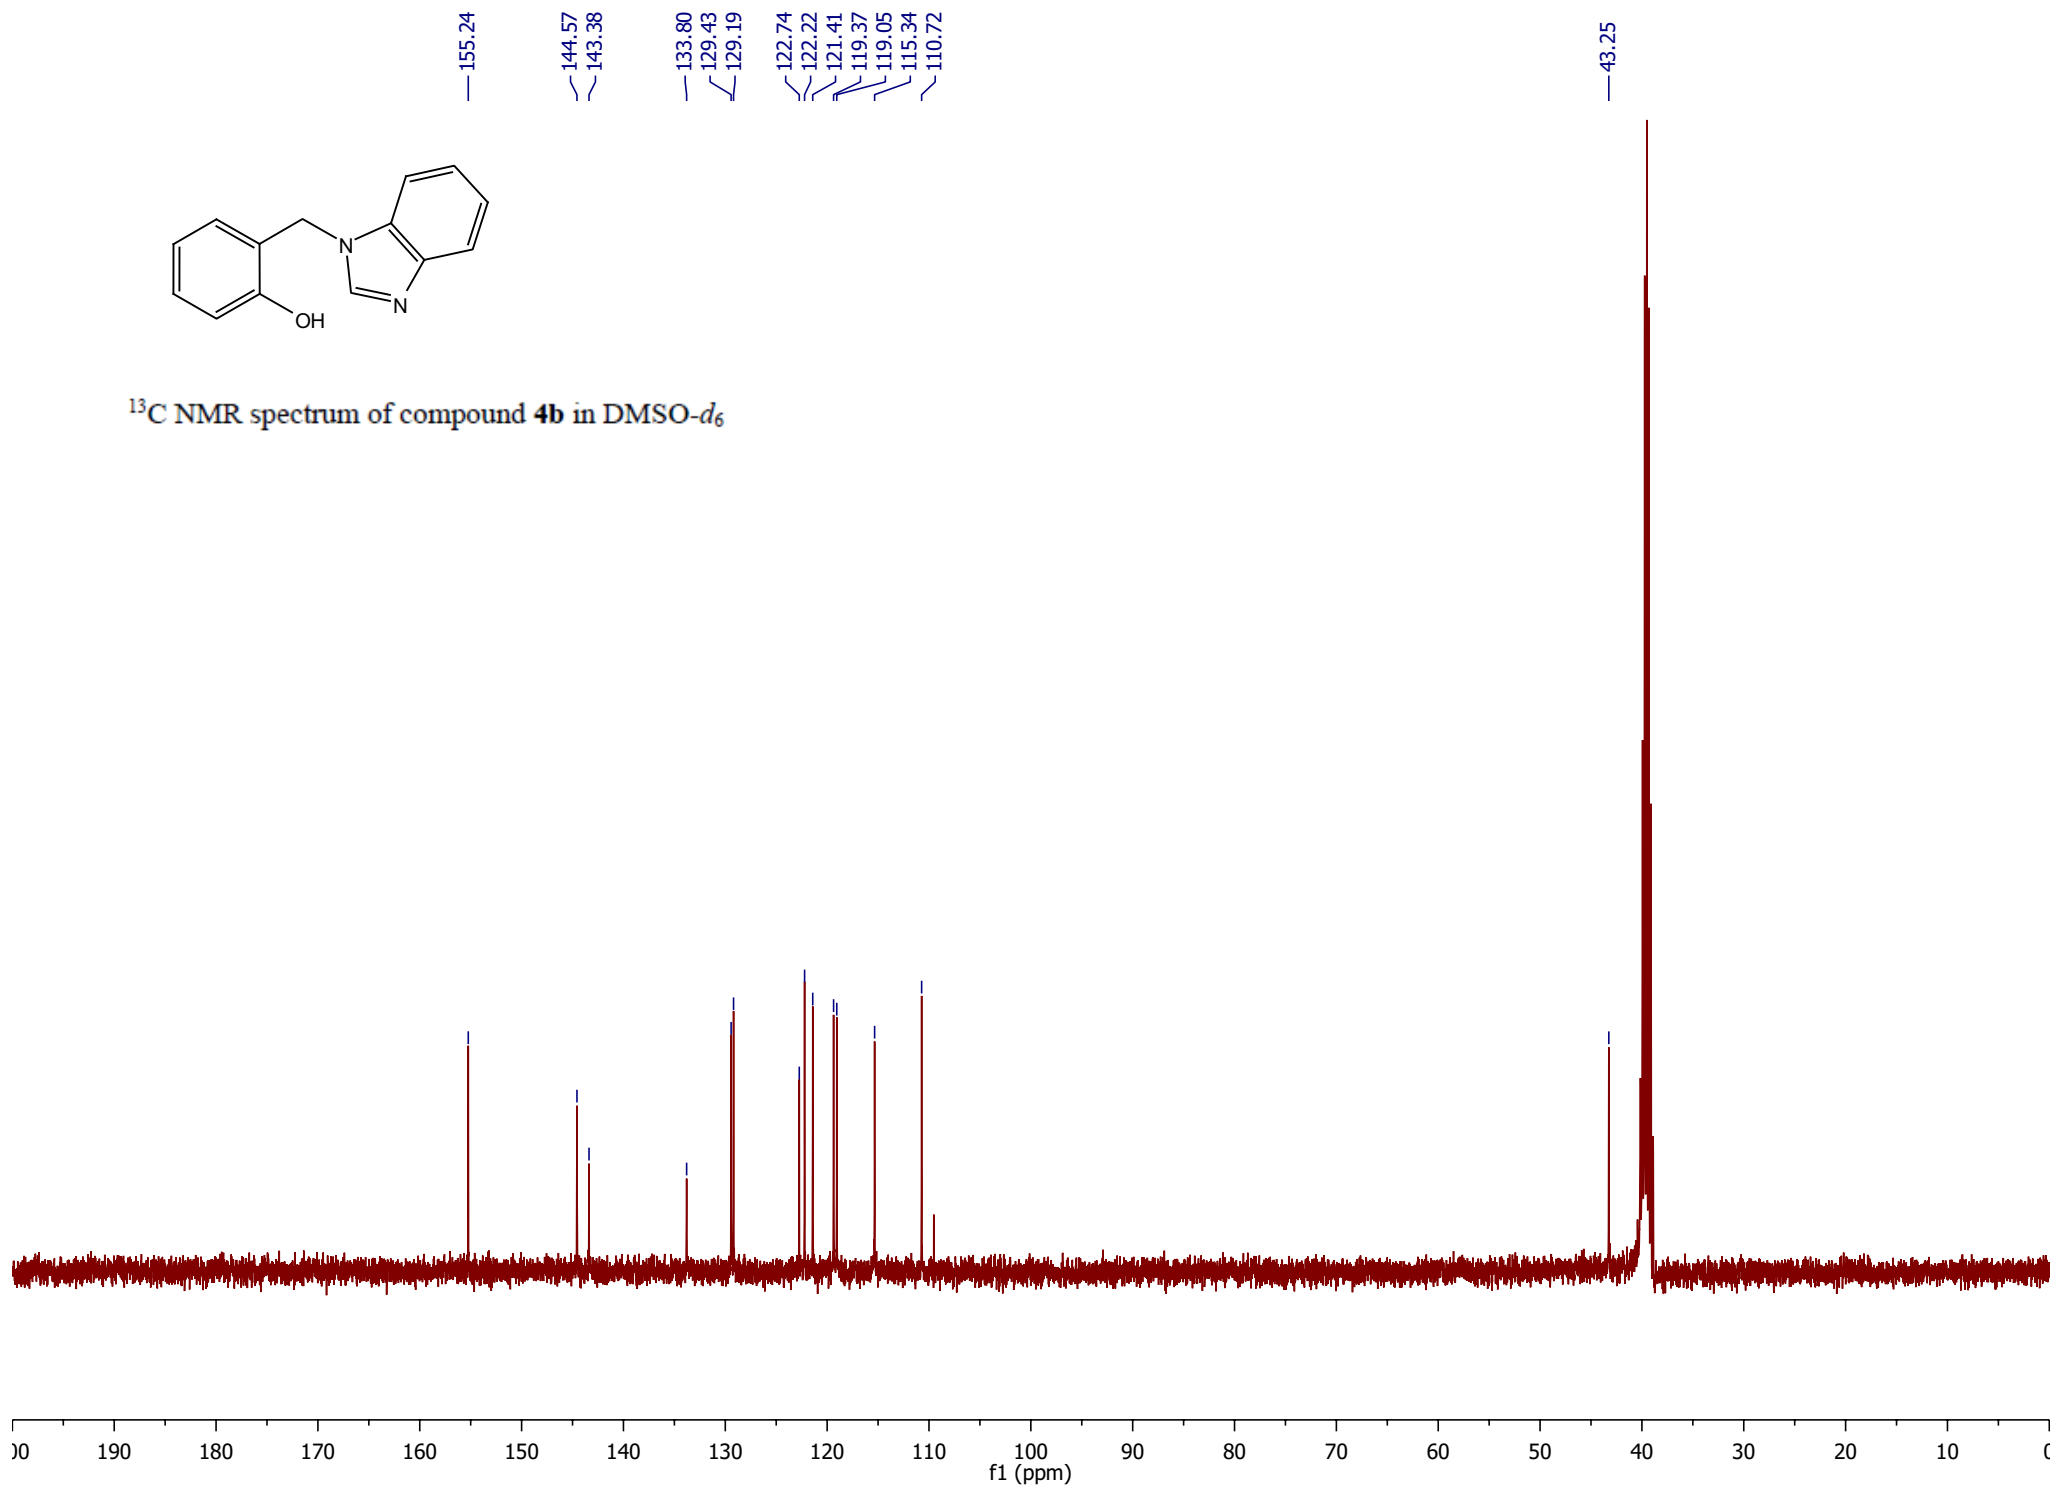

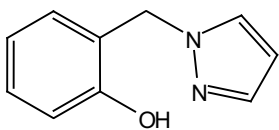

$^1\text{H}$  NMR spectrum of compound 4c in DMSO- $d_6$

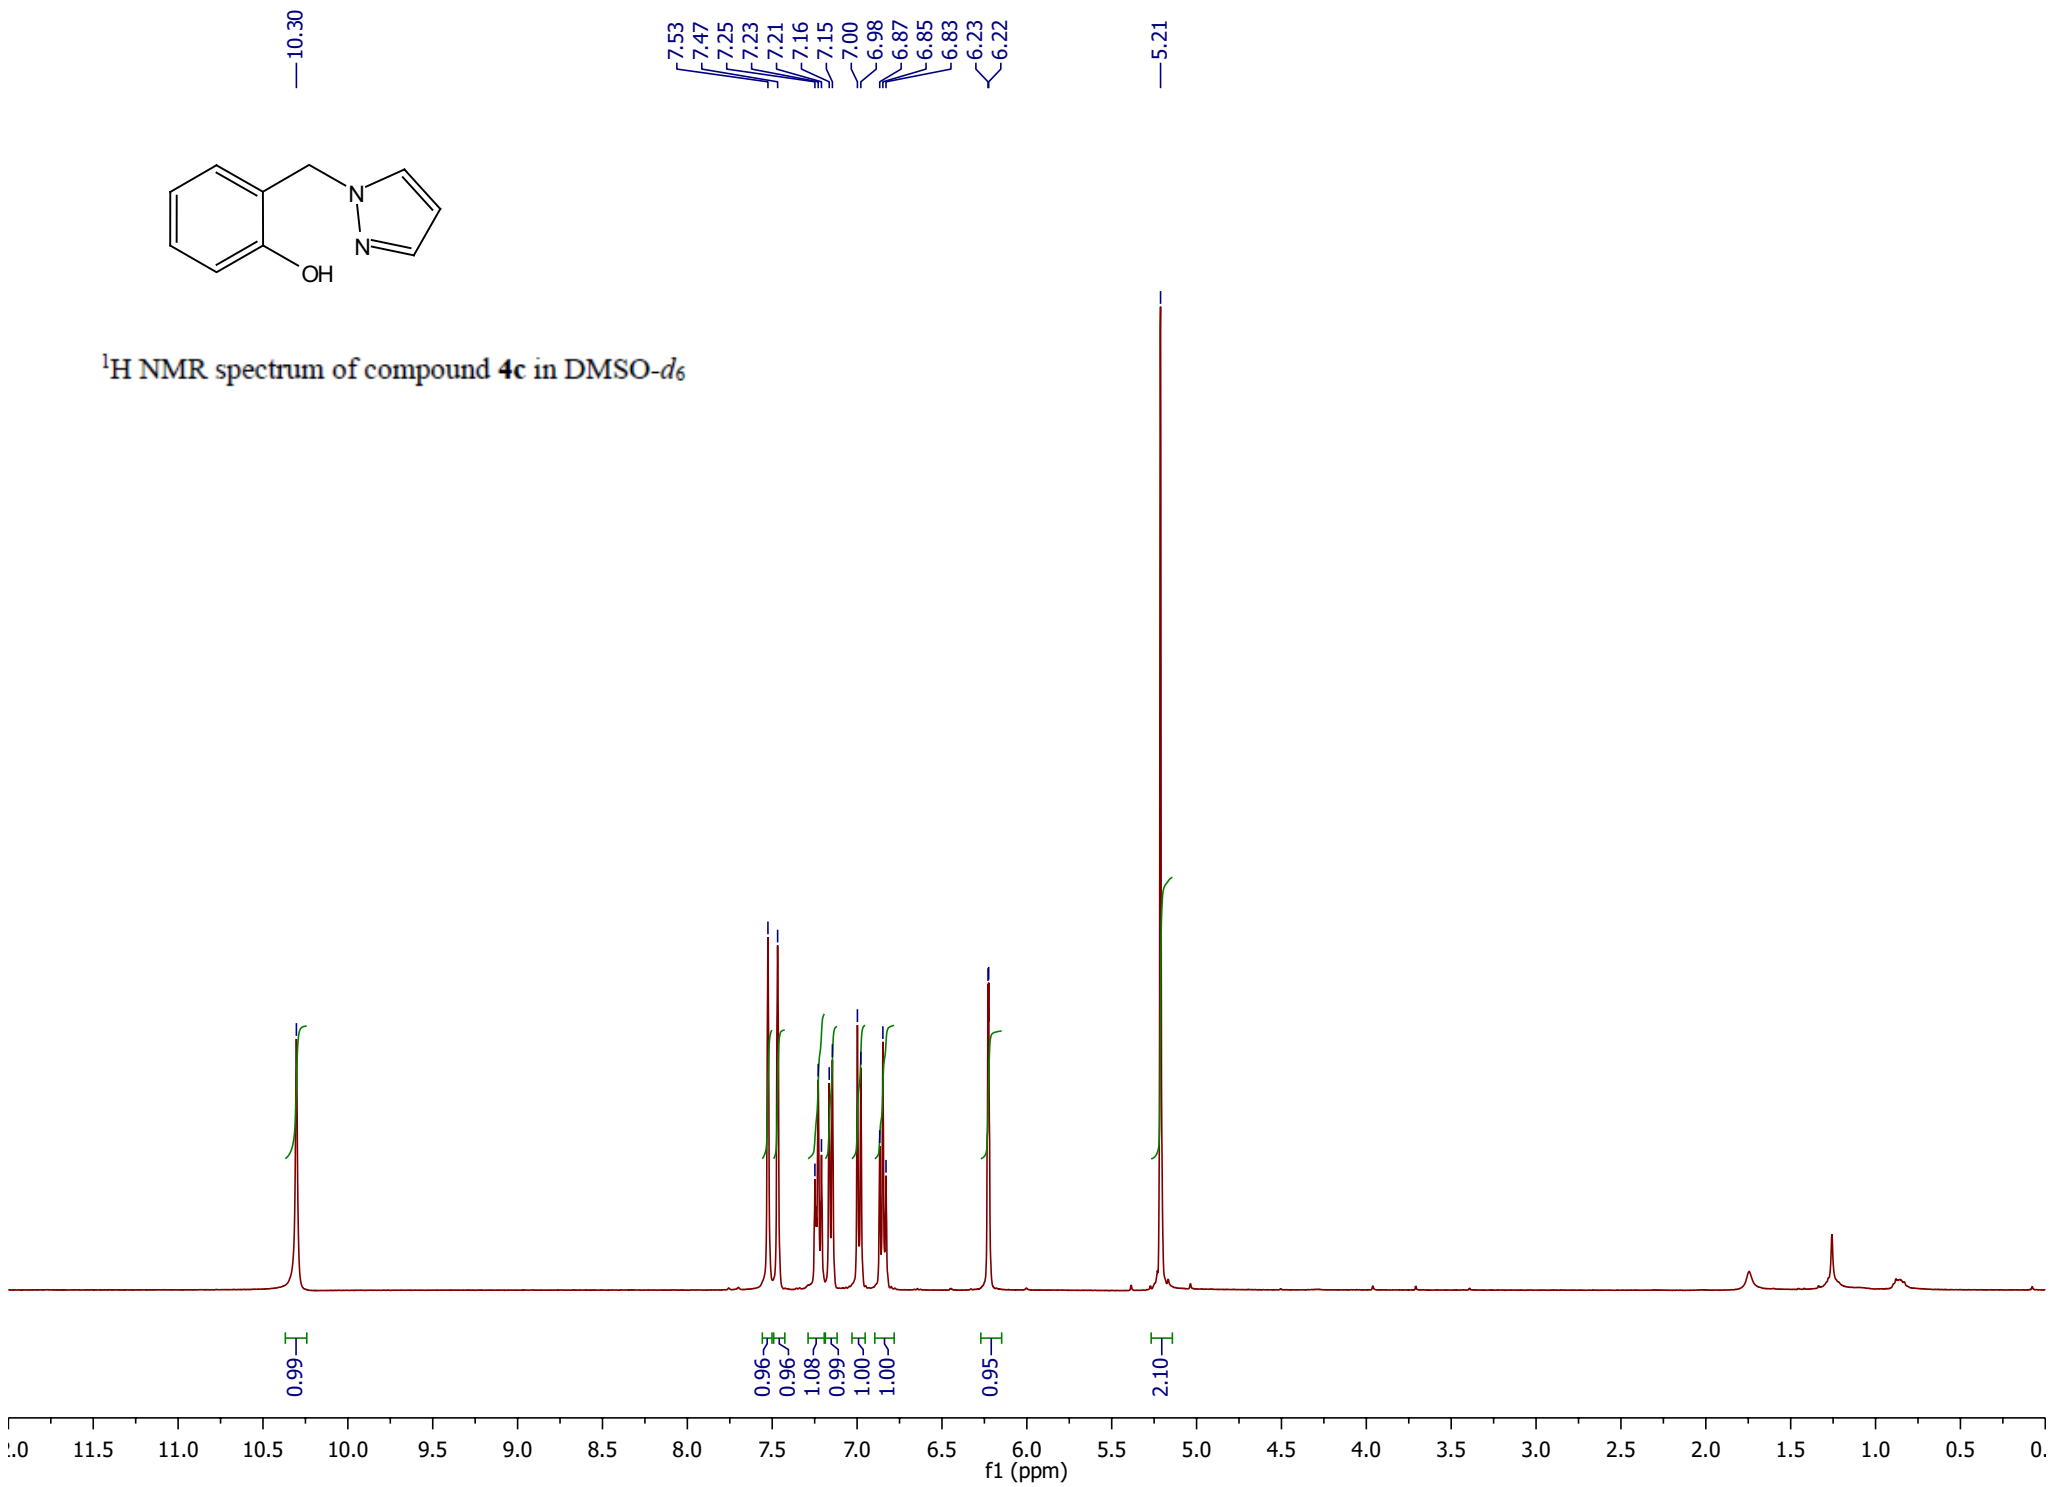

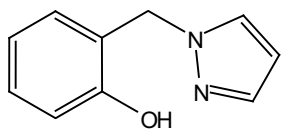

— 156.62

— 139.25

130.62

130.17

129.65

123.39

120.28

118.87

— 105.75

— 53.39

$^{13}\text{C}$  NMR spectrum of compound **4c** in  $\text{DMSO-}d_6$

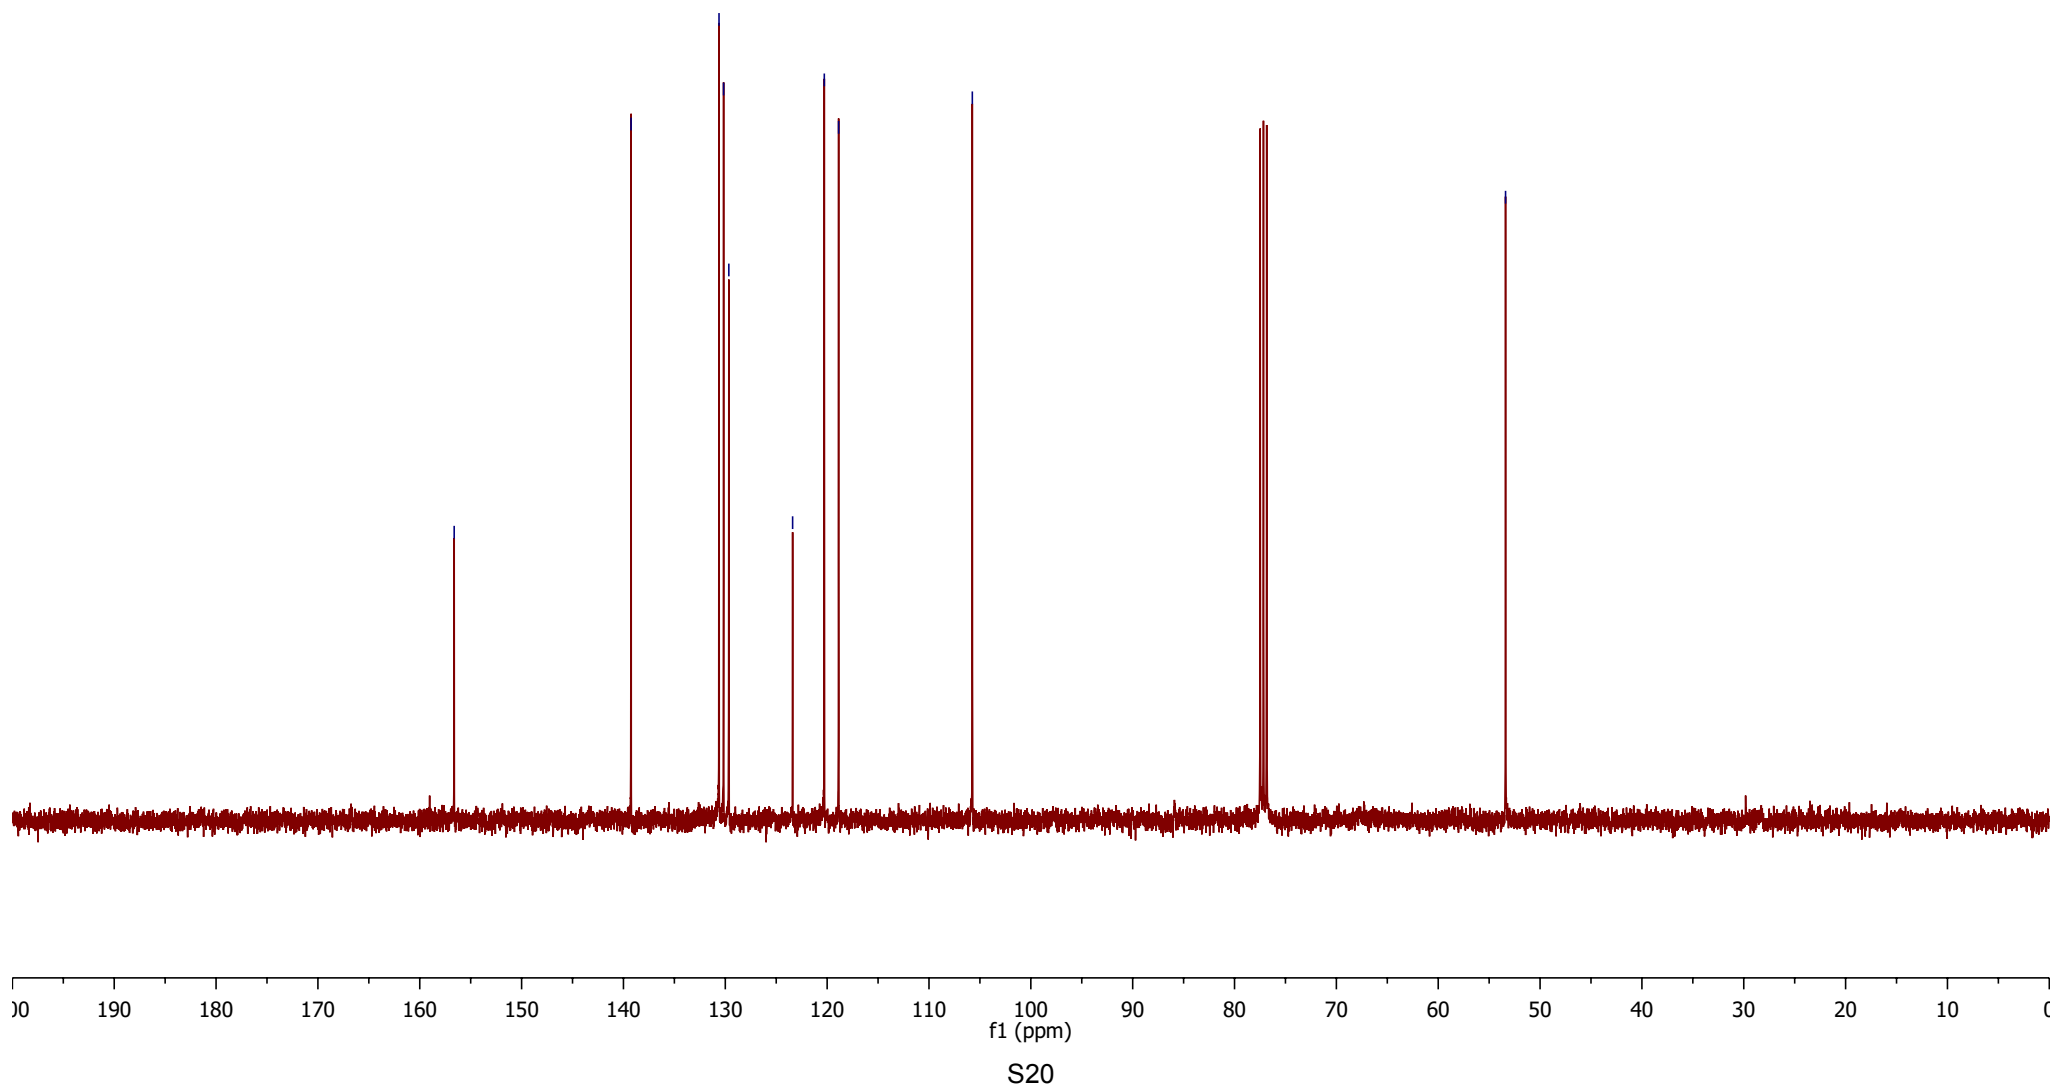

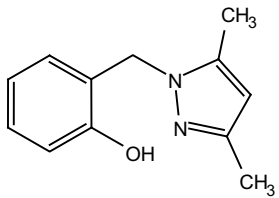

$^1\text{H}$  NMR spectrum of compound 4d in DMSO- $d_6$

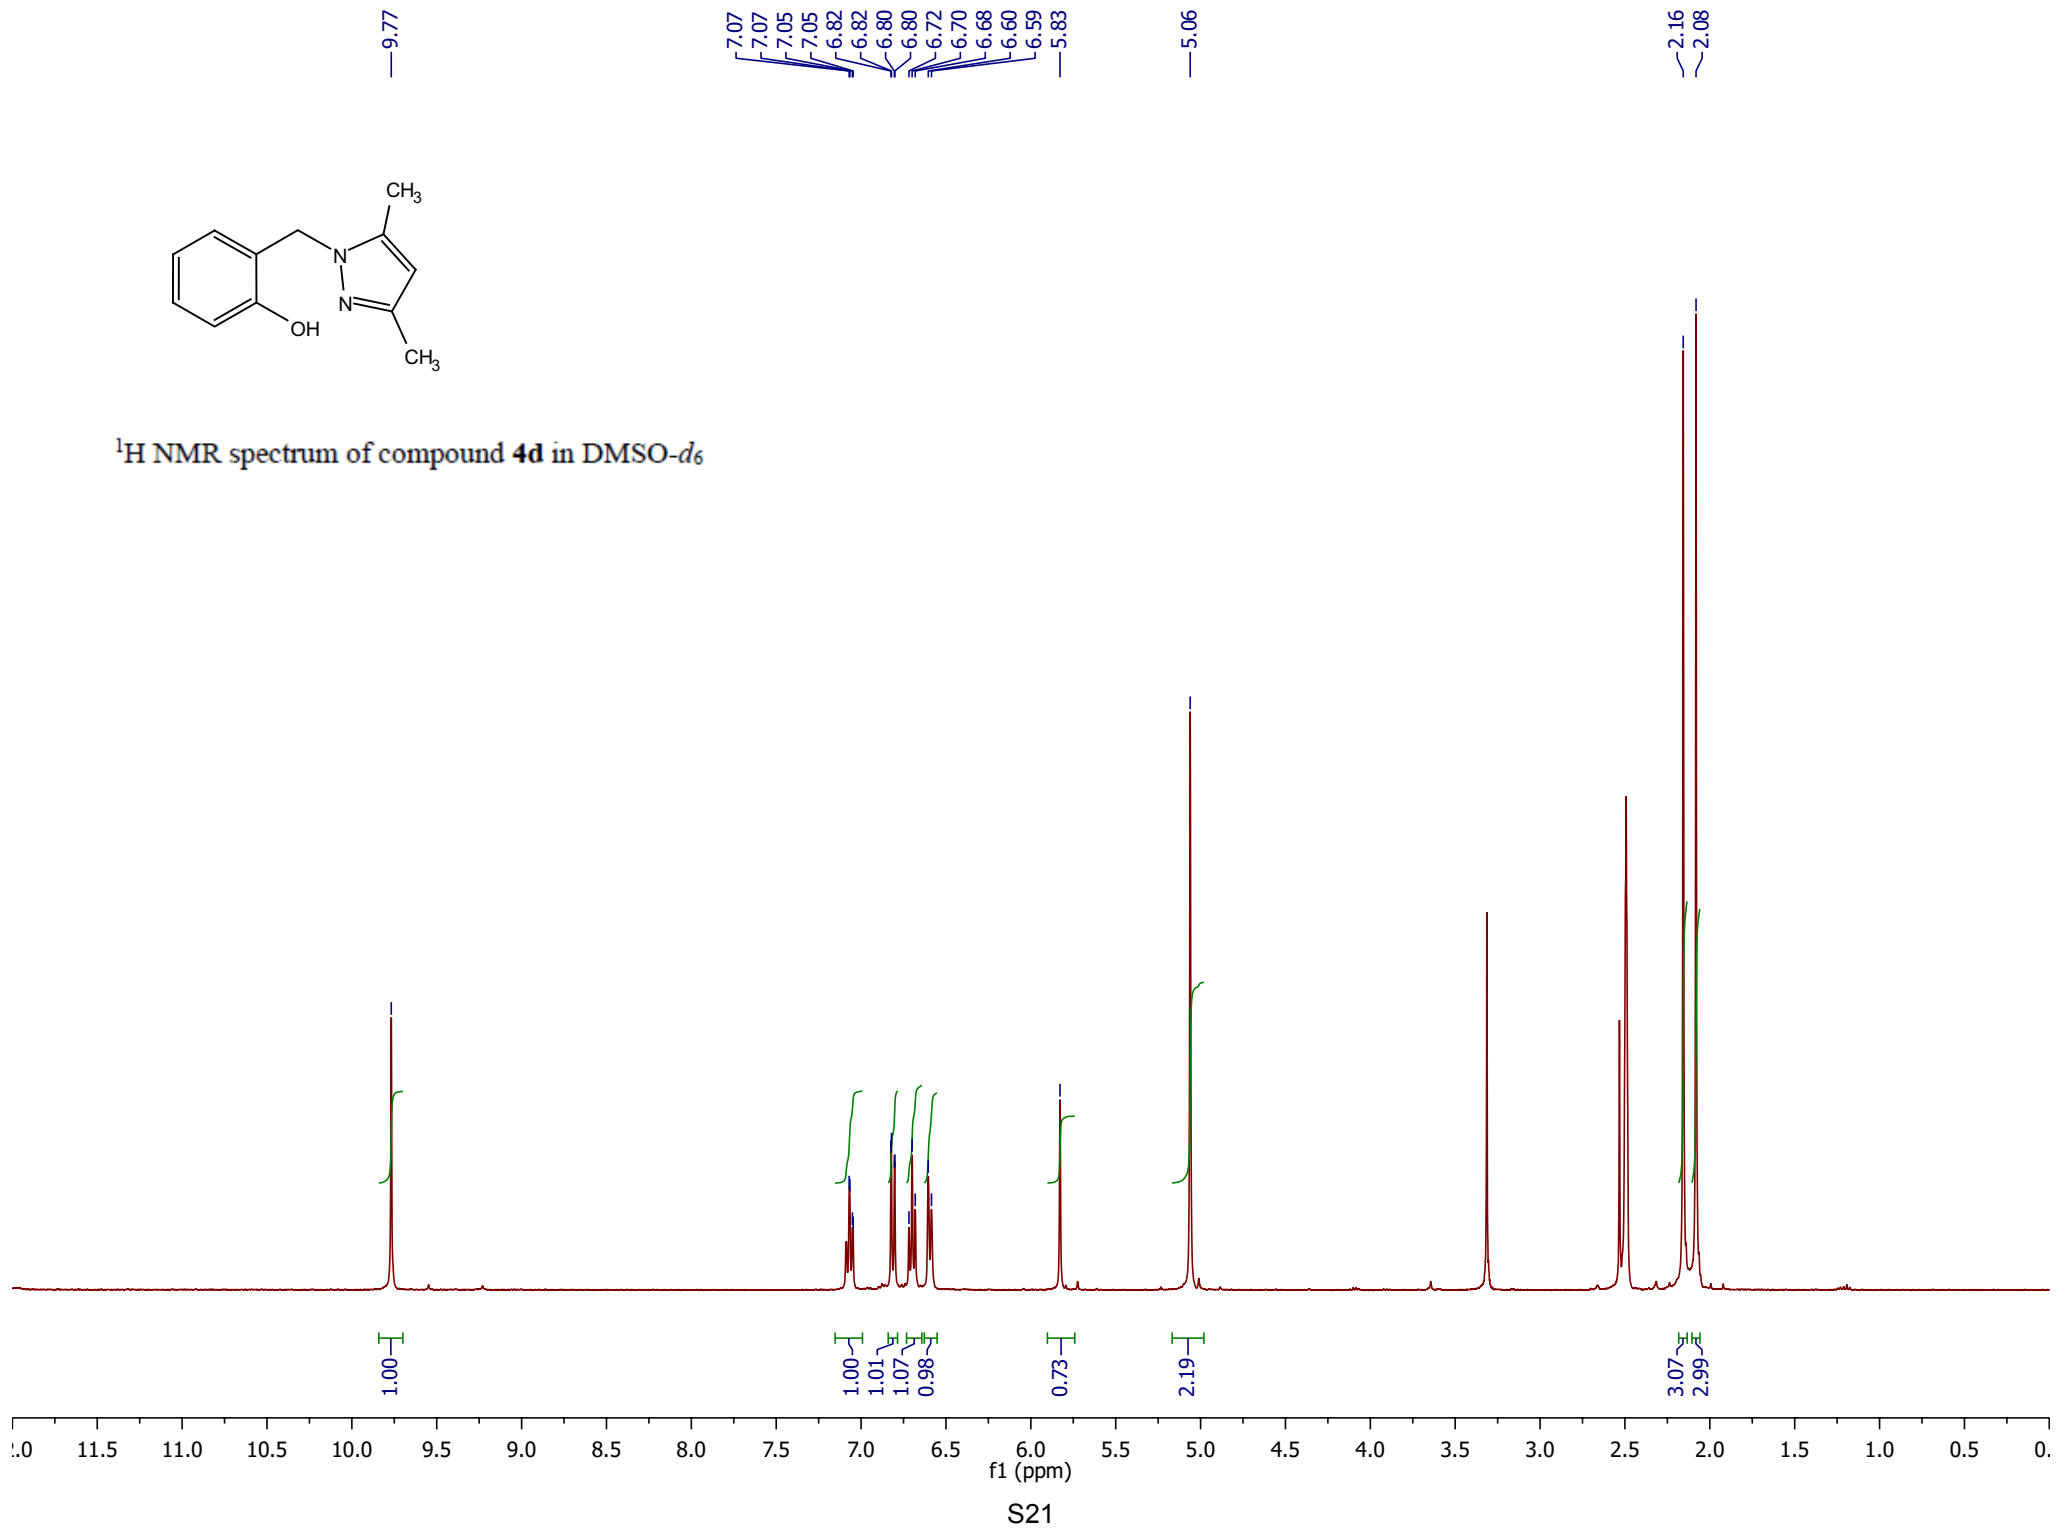

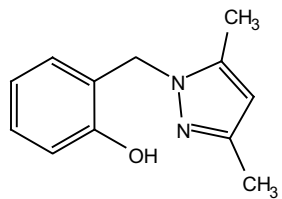

<sup>13</sup>C NMR spectrum of compound **4d** in DMSO-*d*<sub>6</sub>

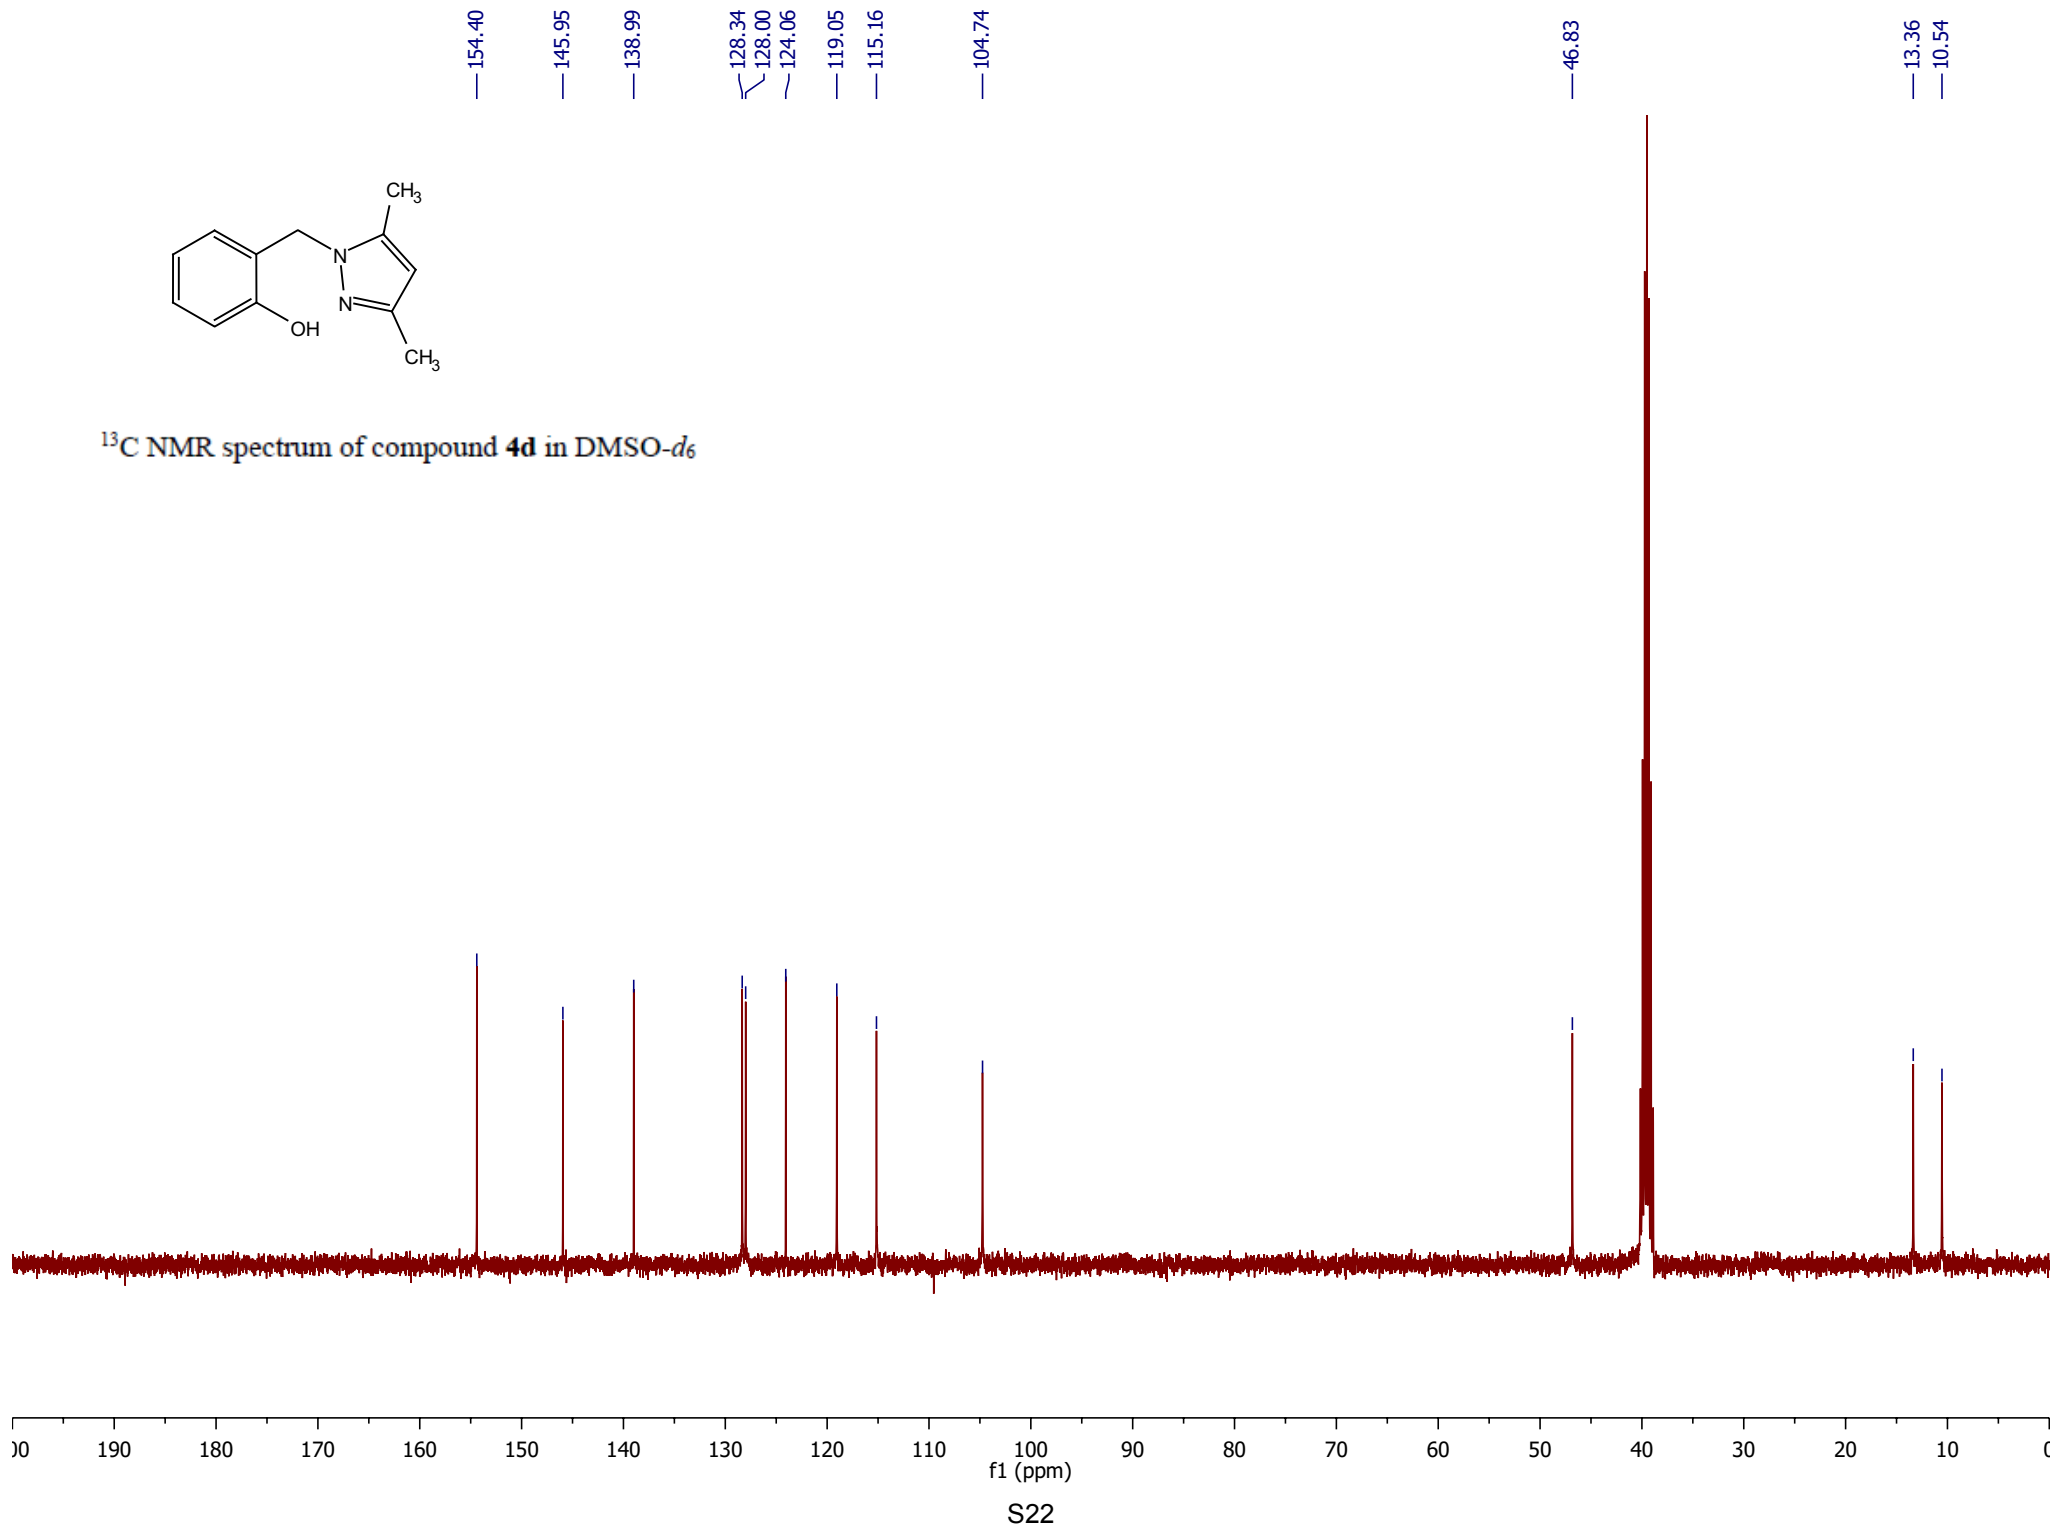

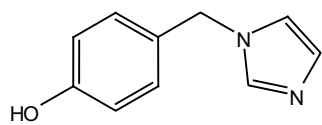

$^1\text{H}$  NMR spectrum of compound 5a in DMSO- $d_6$

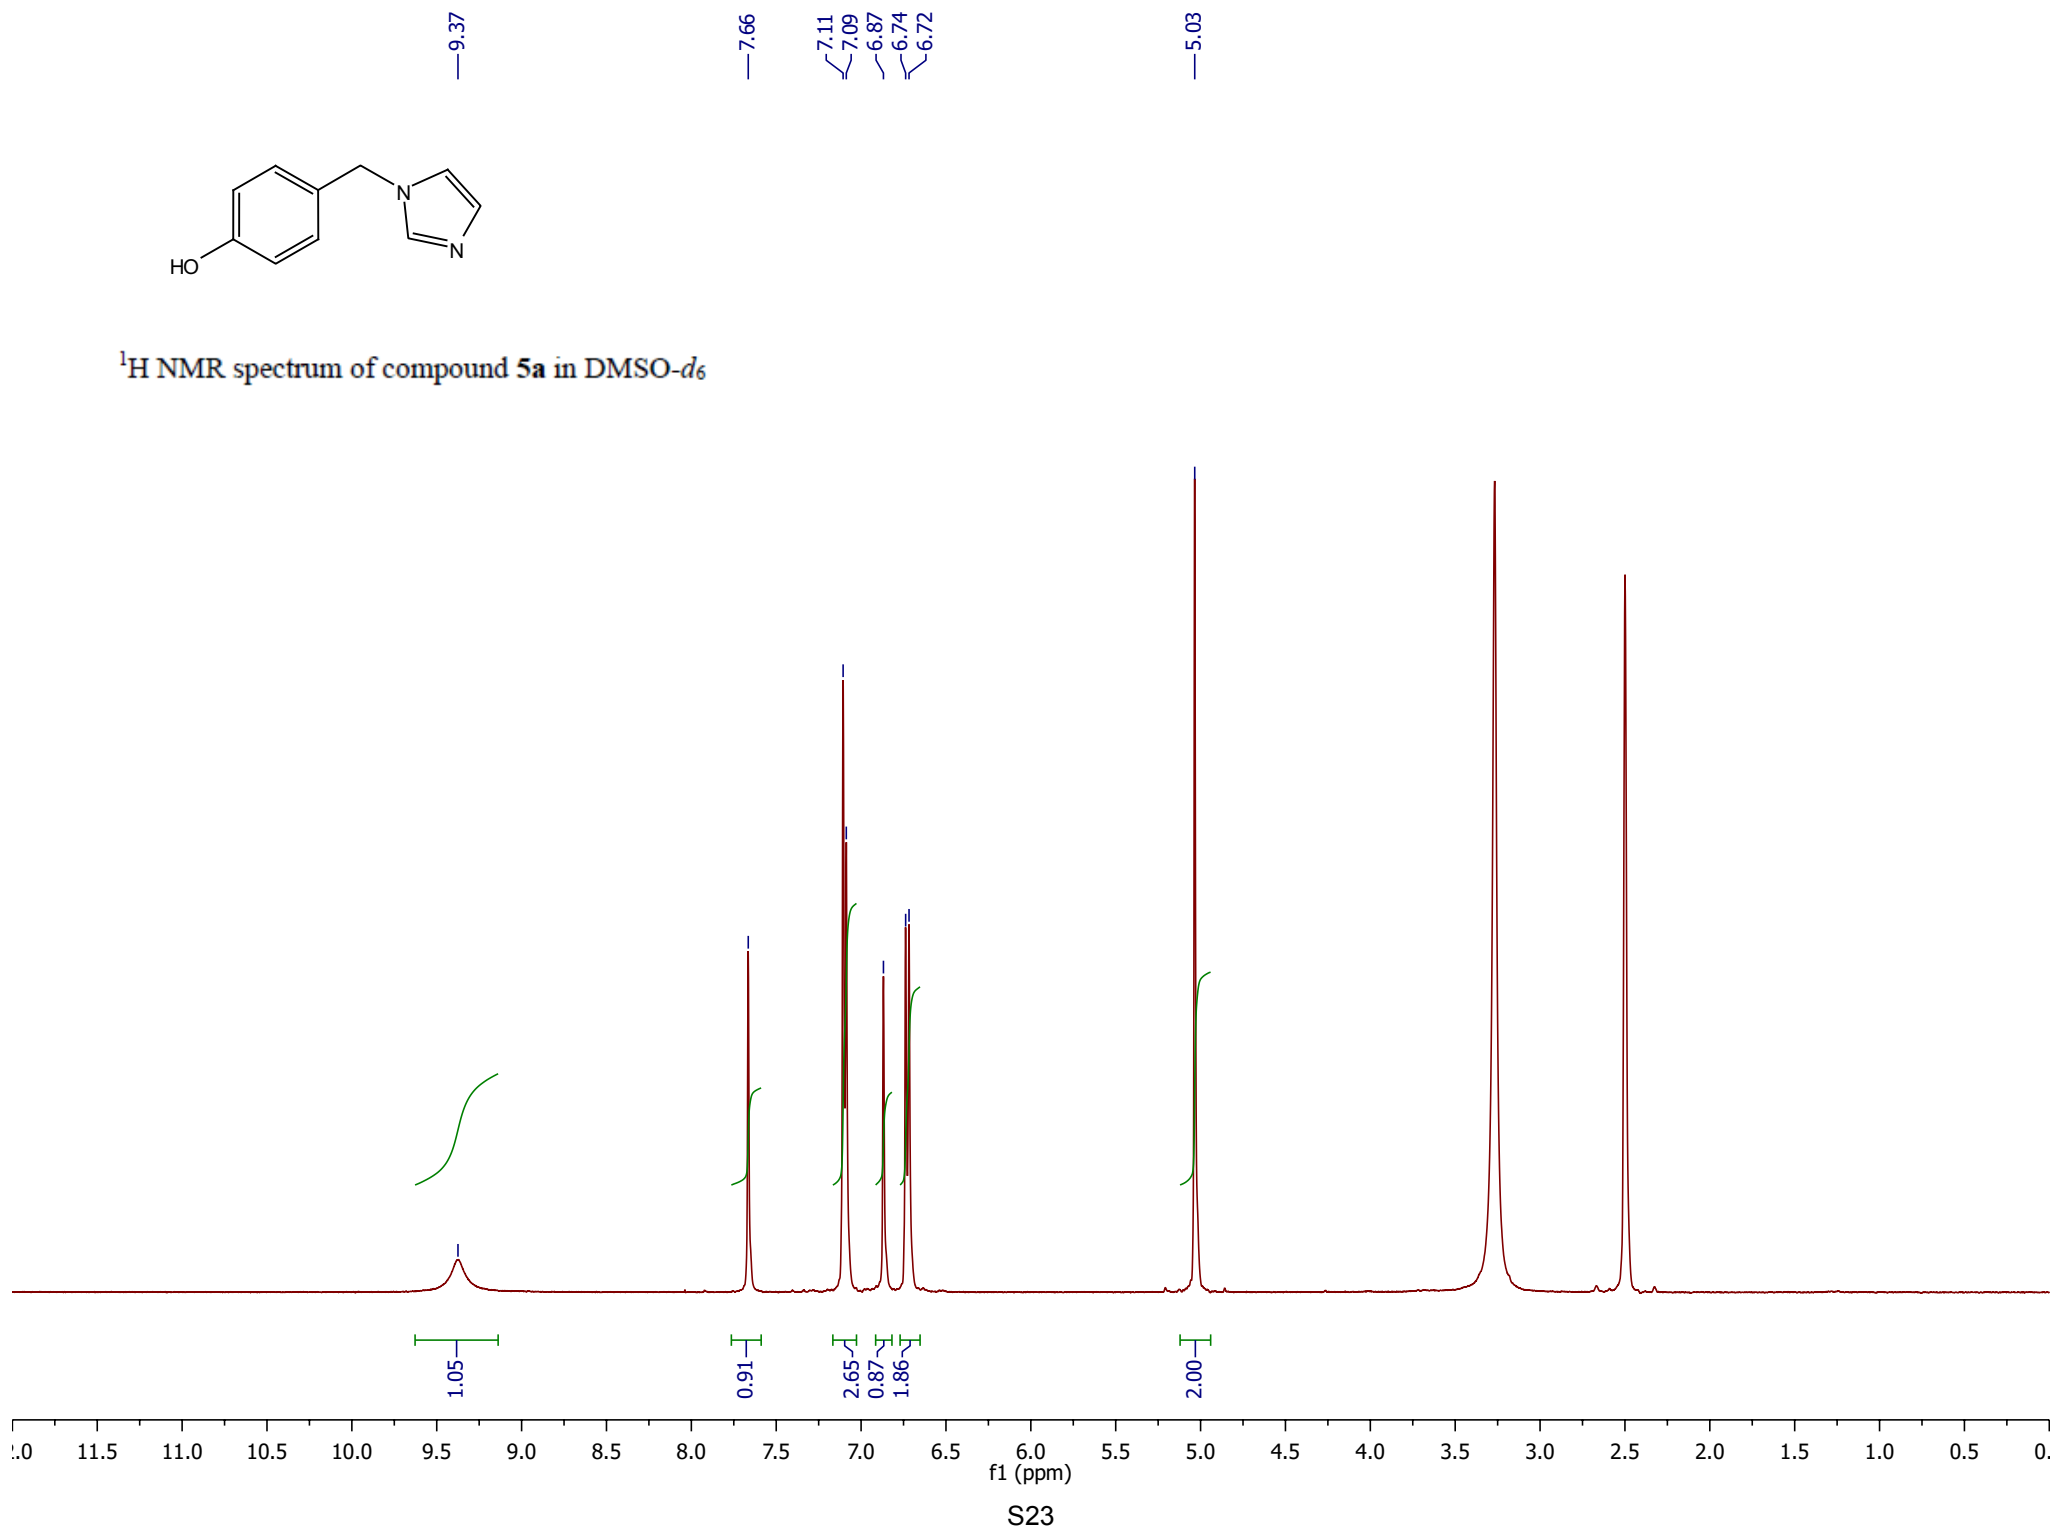



$^{13}\text{C}$  NMR spectrum of compound 5a in  $\text{DMSO-}d_6$

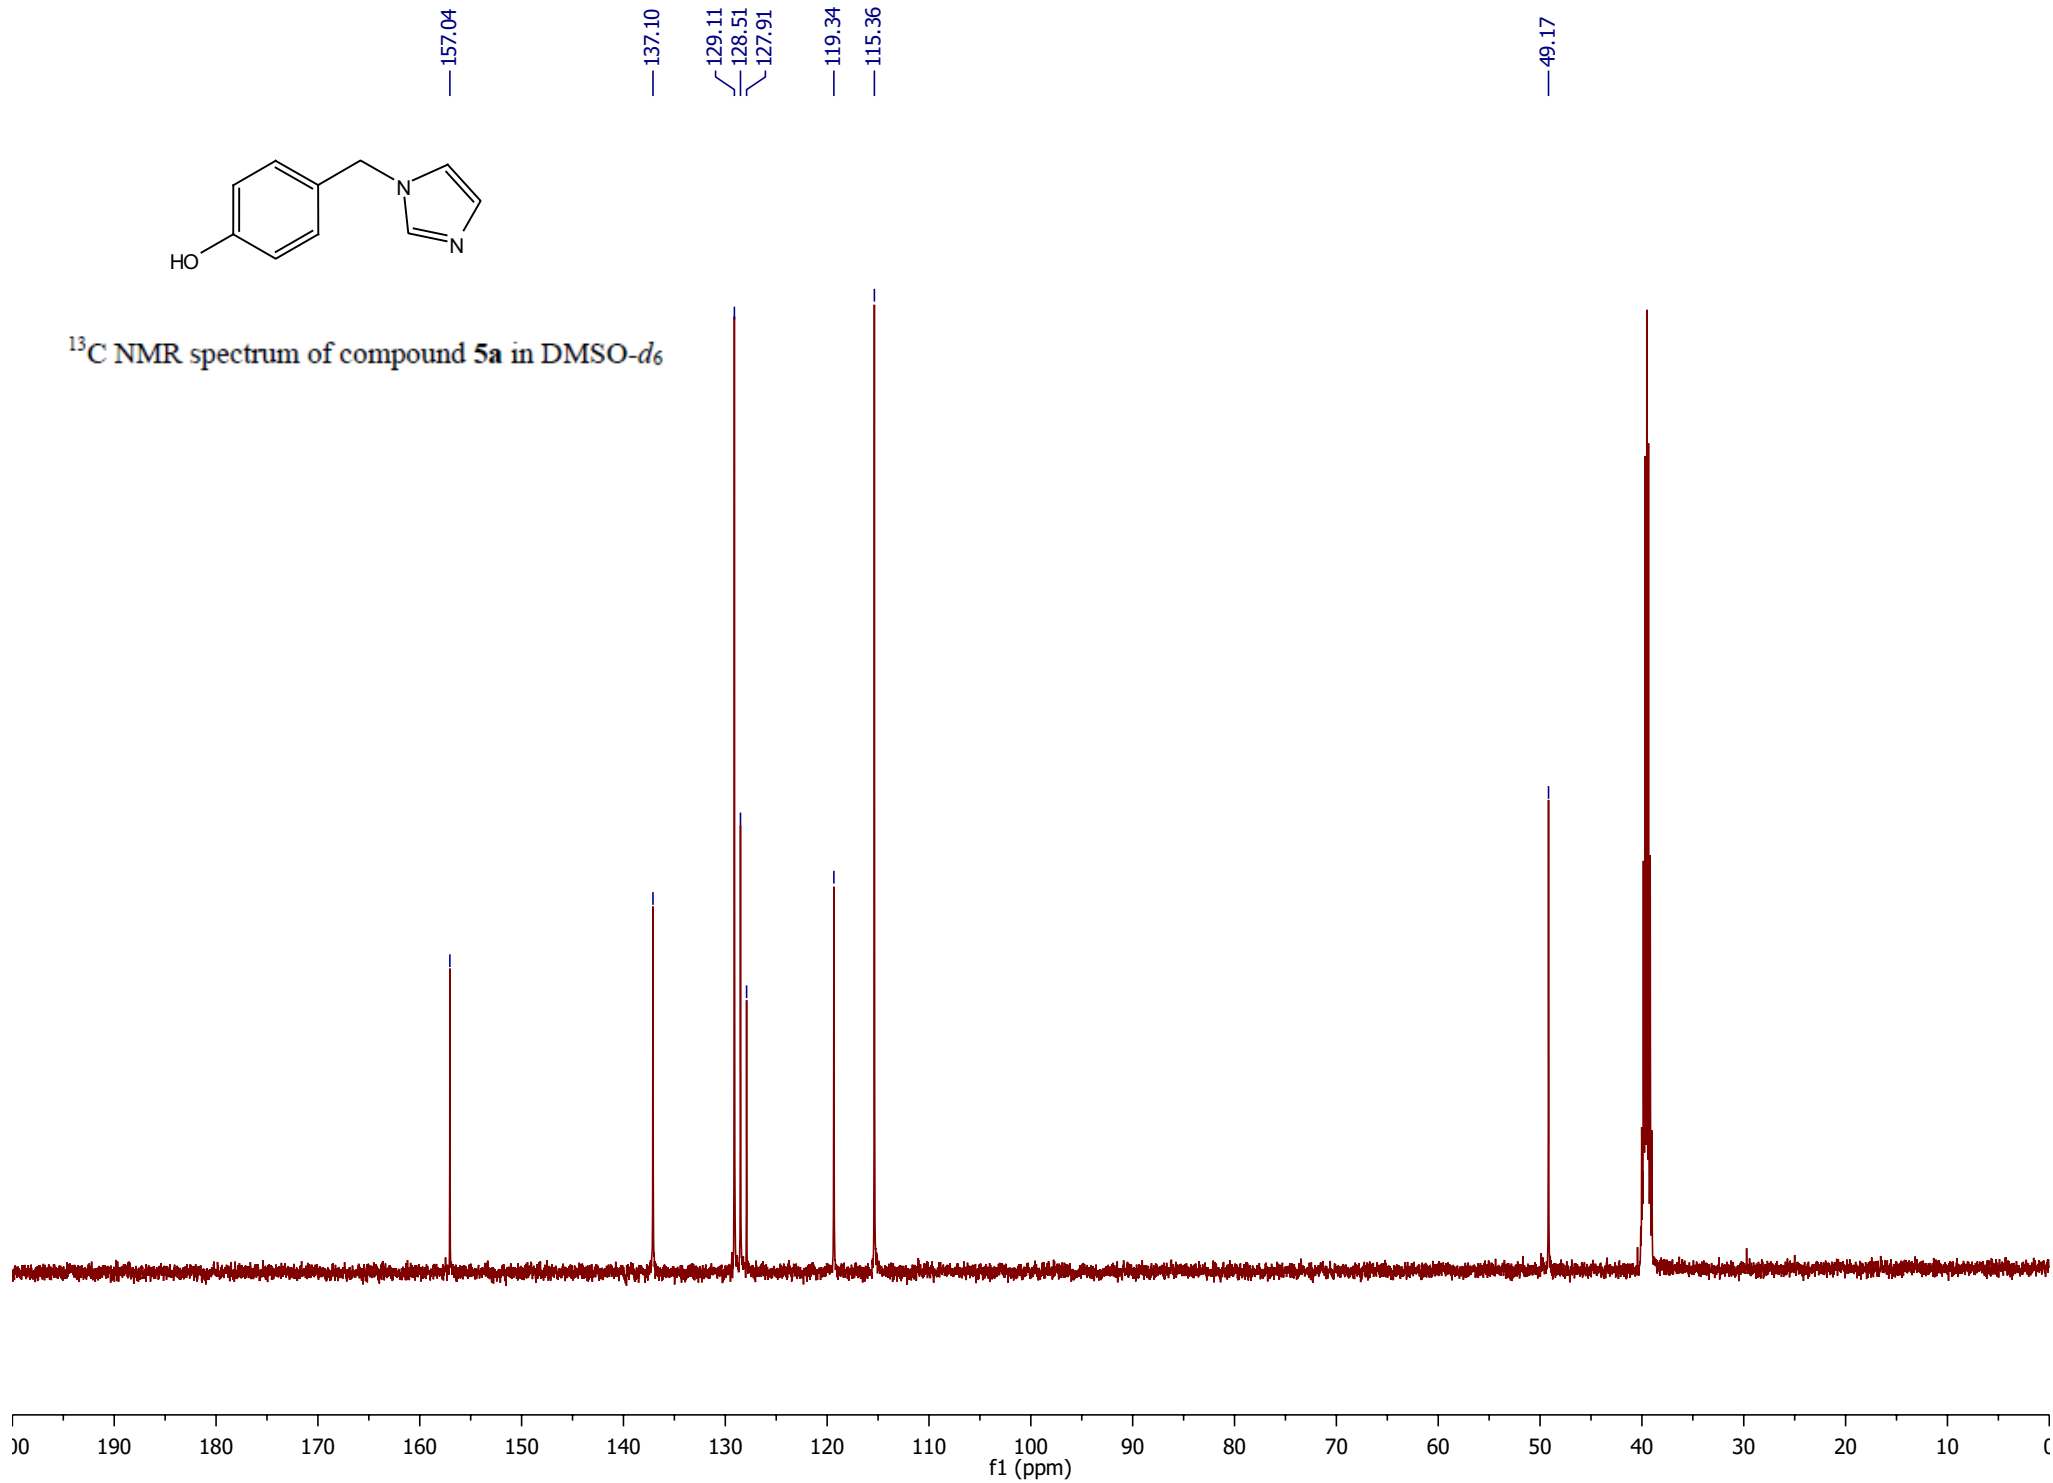



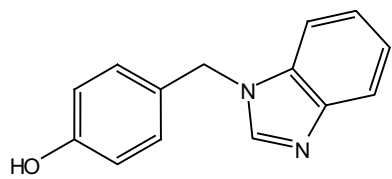

$^1\text{H}$  NMR spectrum of compound **5b** in  $\text{DMSO-}d_6$

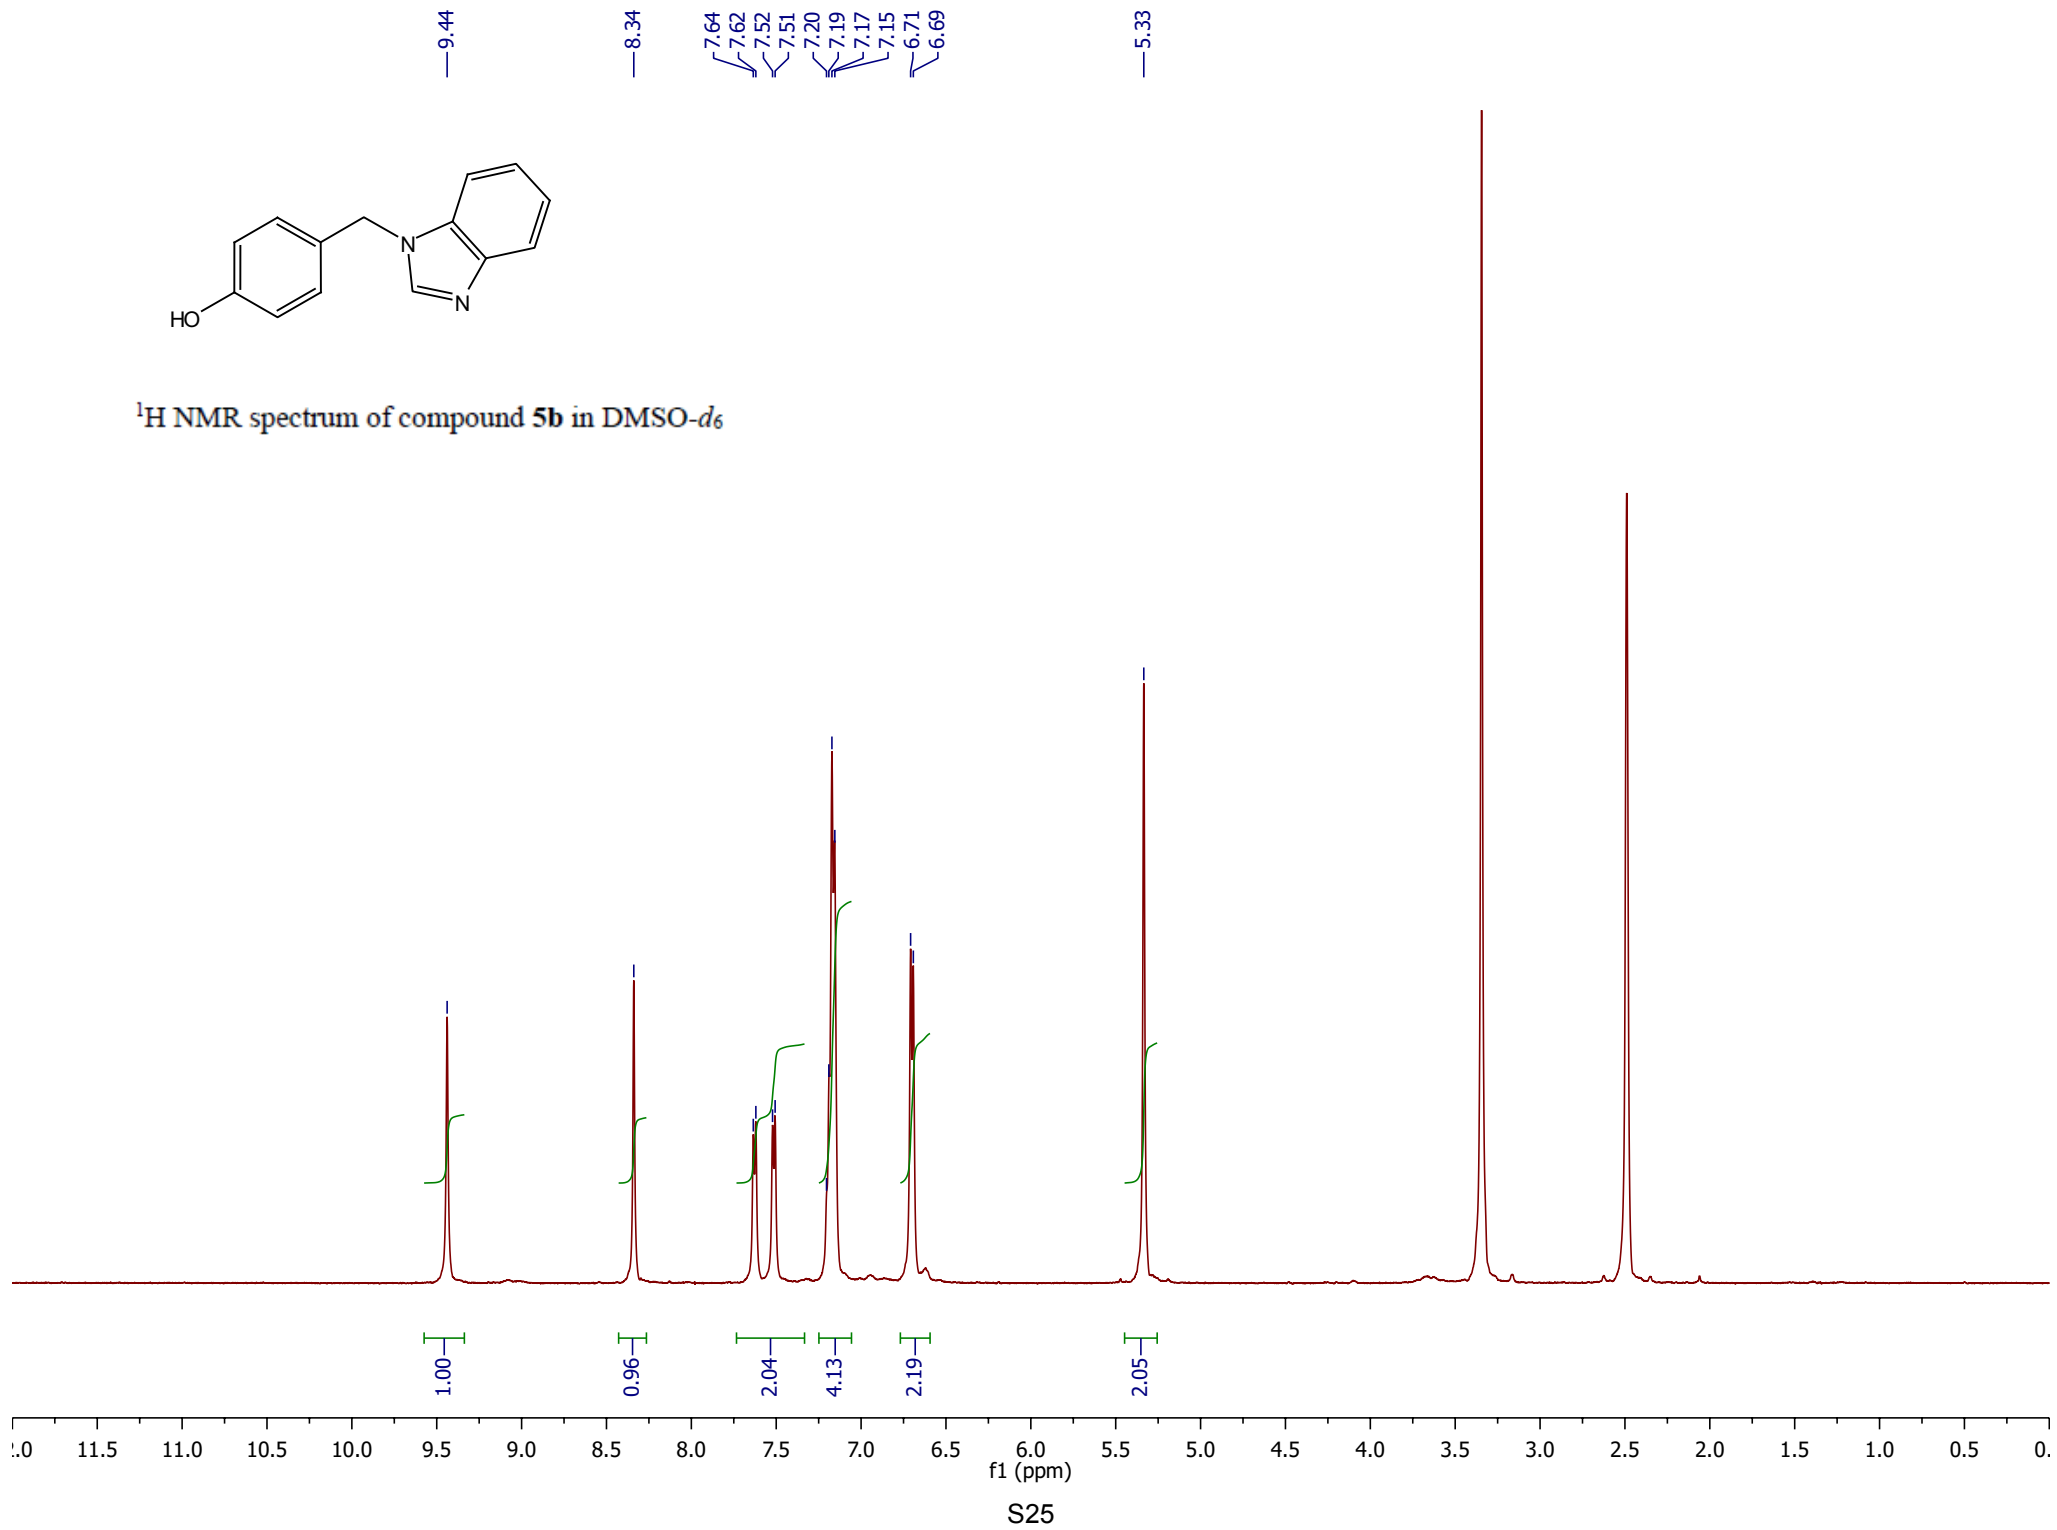

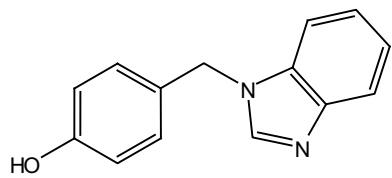

$^{13}\text{C}$  NMR spectrum of compound **5b** in  $\text{DMSO-}d_6$

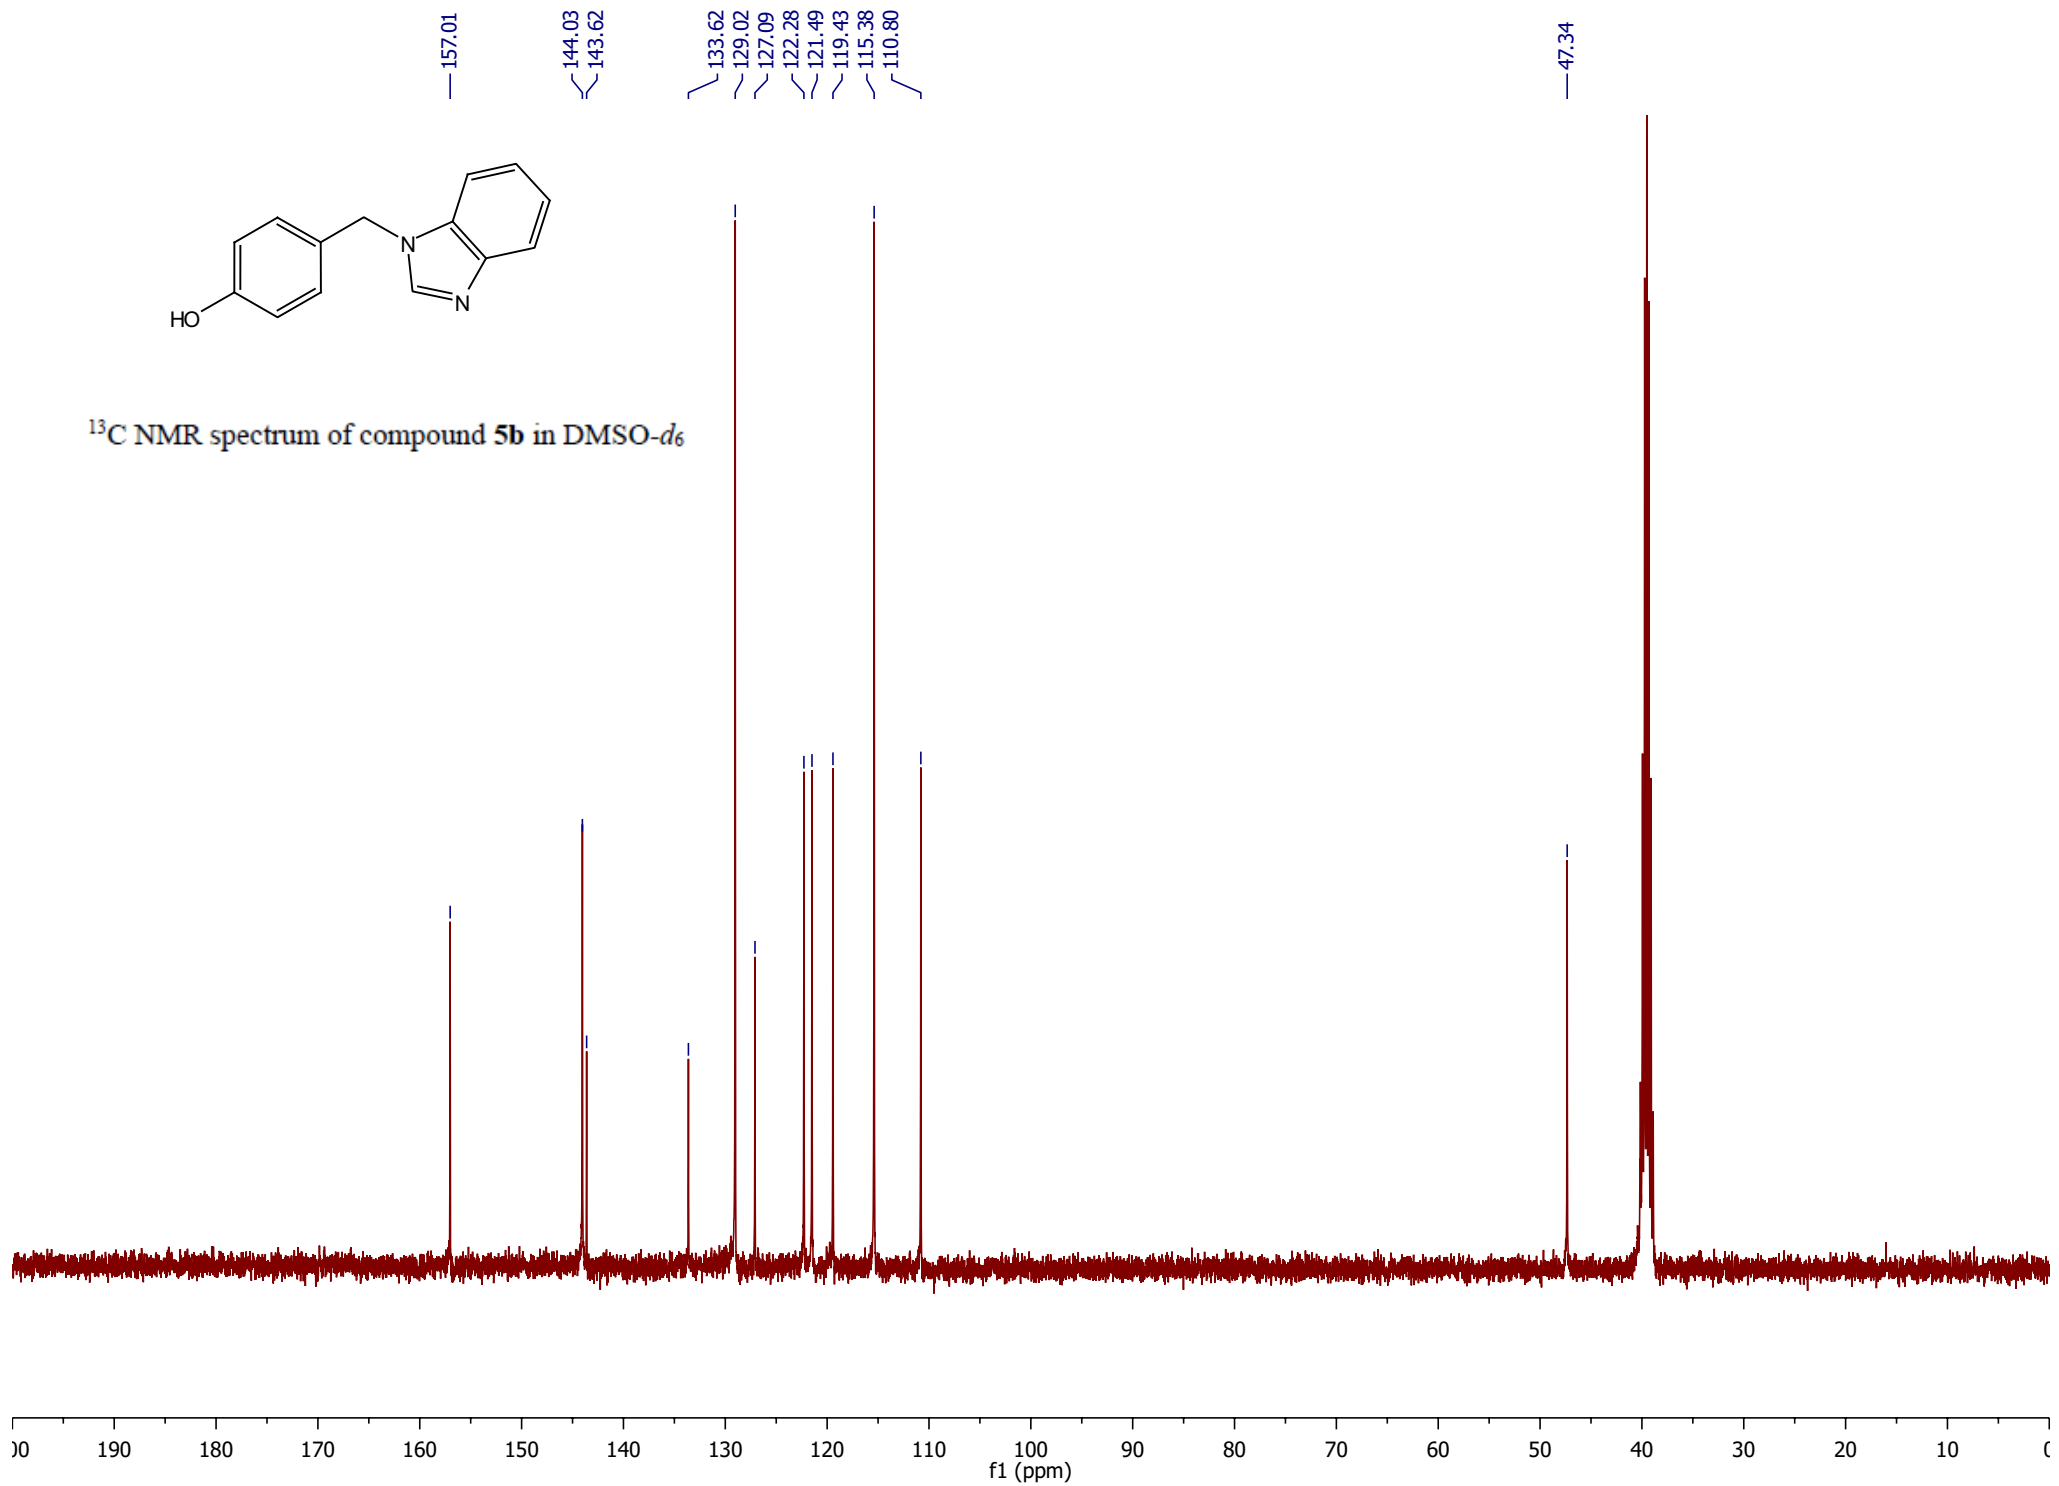

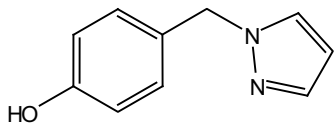

$^1\text{H}$  NMR spectrum of compound **5c** in  $\text{DMSO-}d_6$

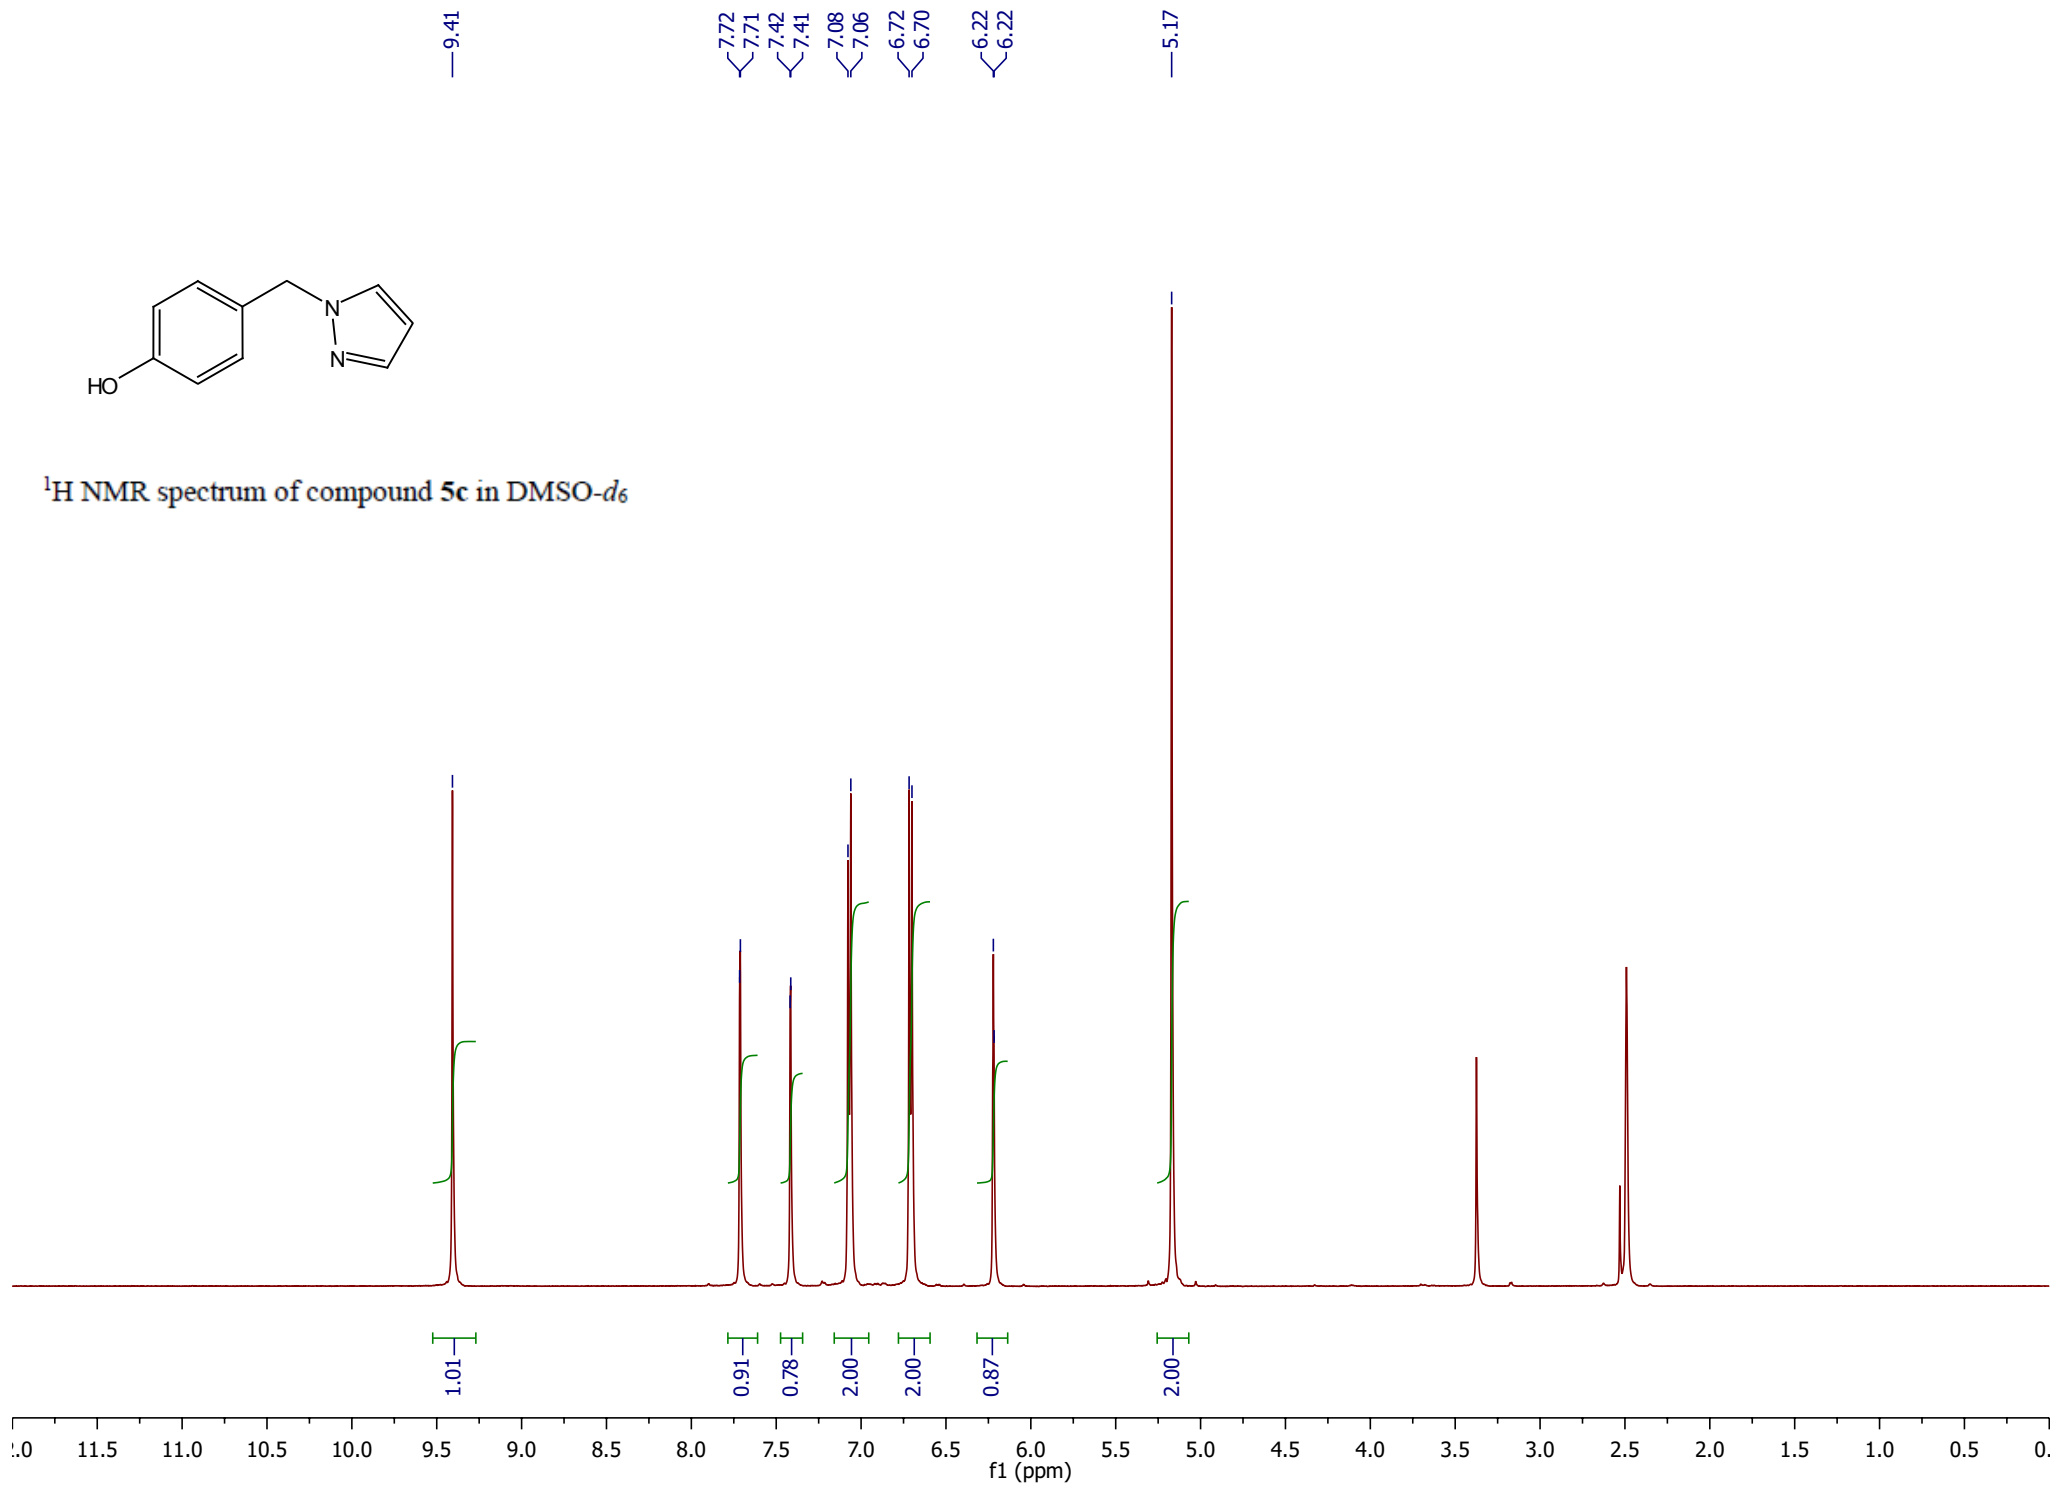

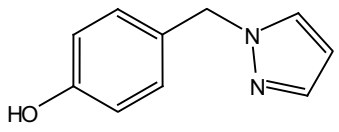

$^{13}\text{C}$  NMR spectrum of compound 5c in  $\text{DMSO-}d_6$

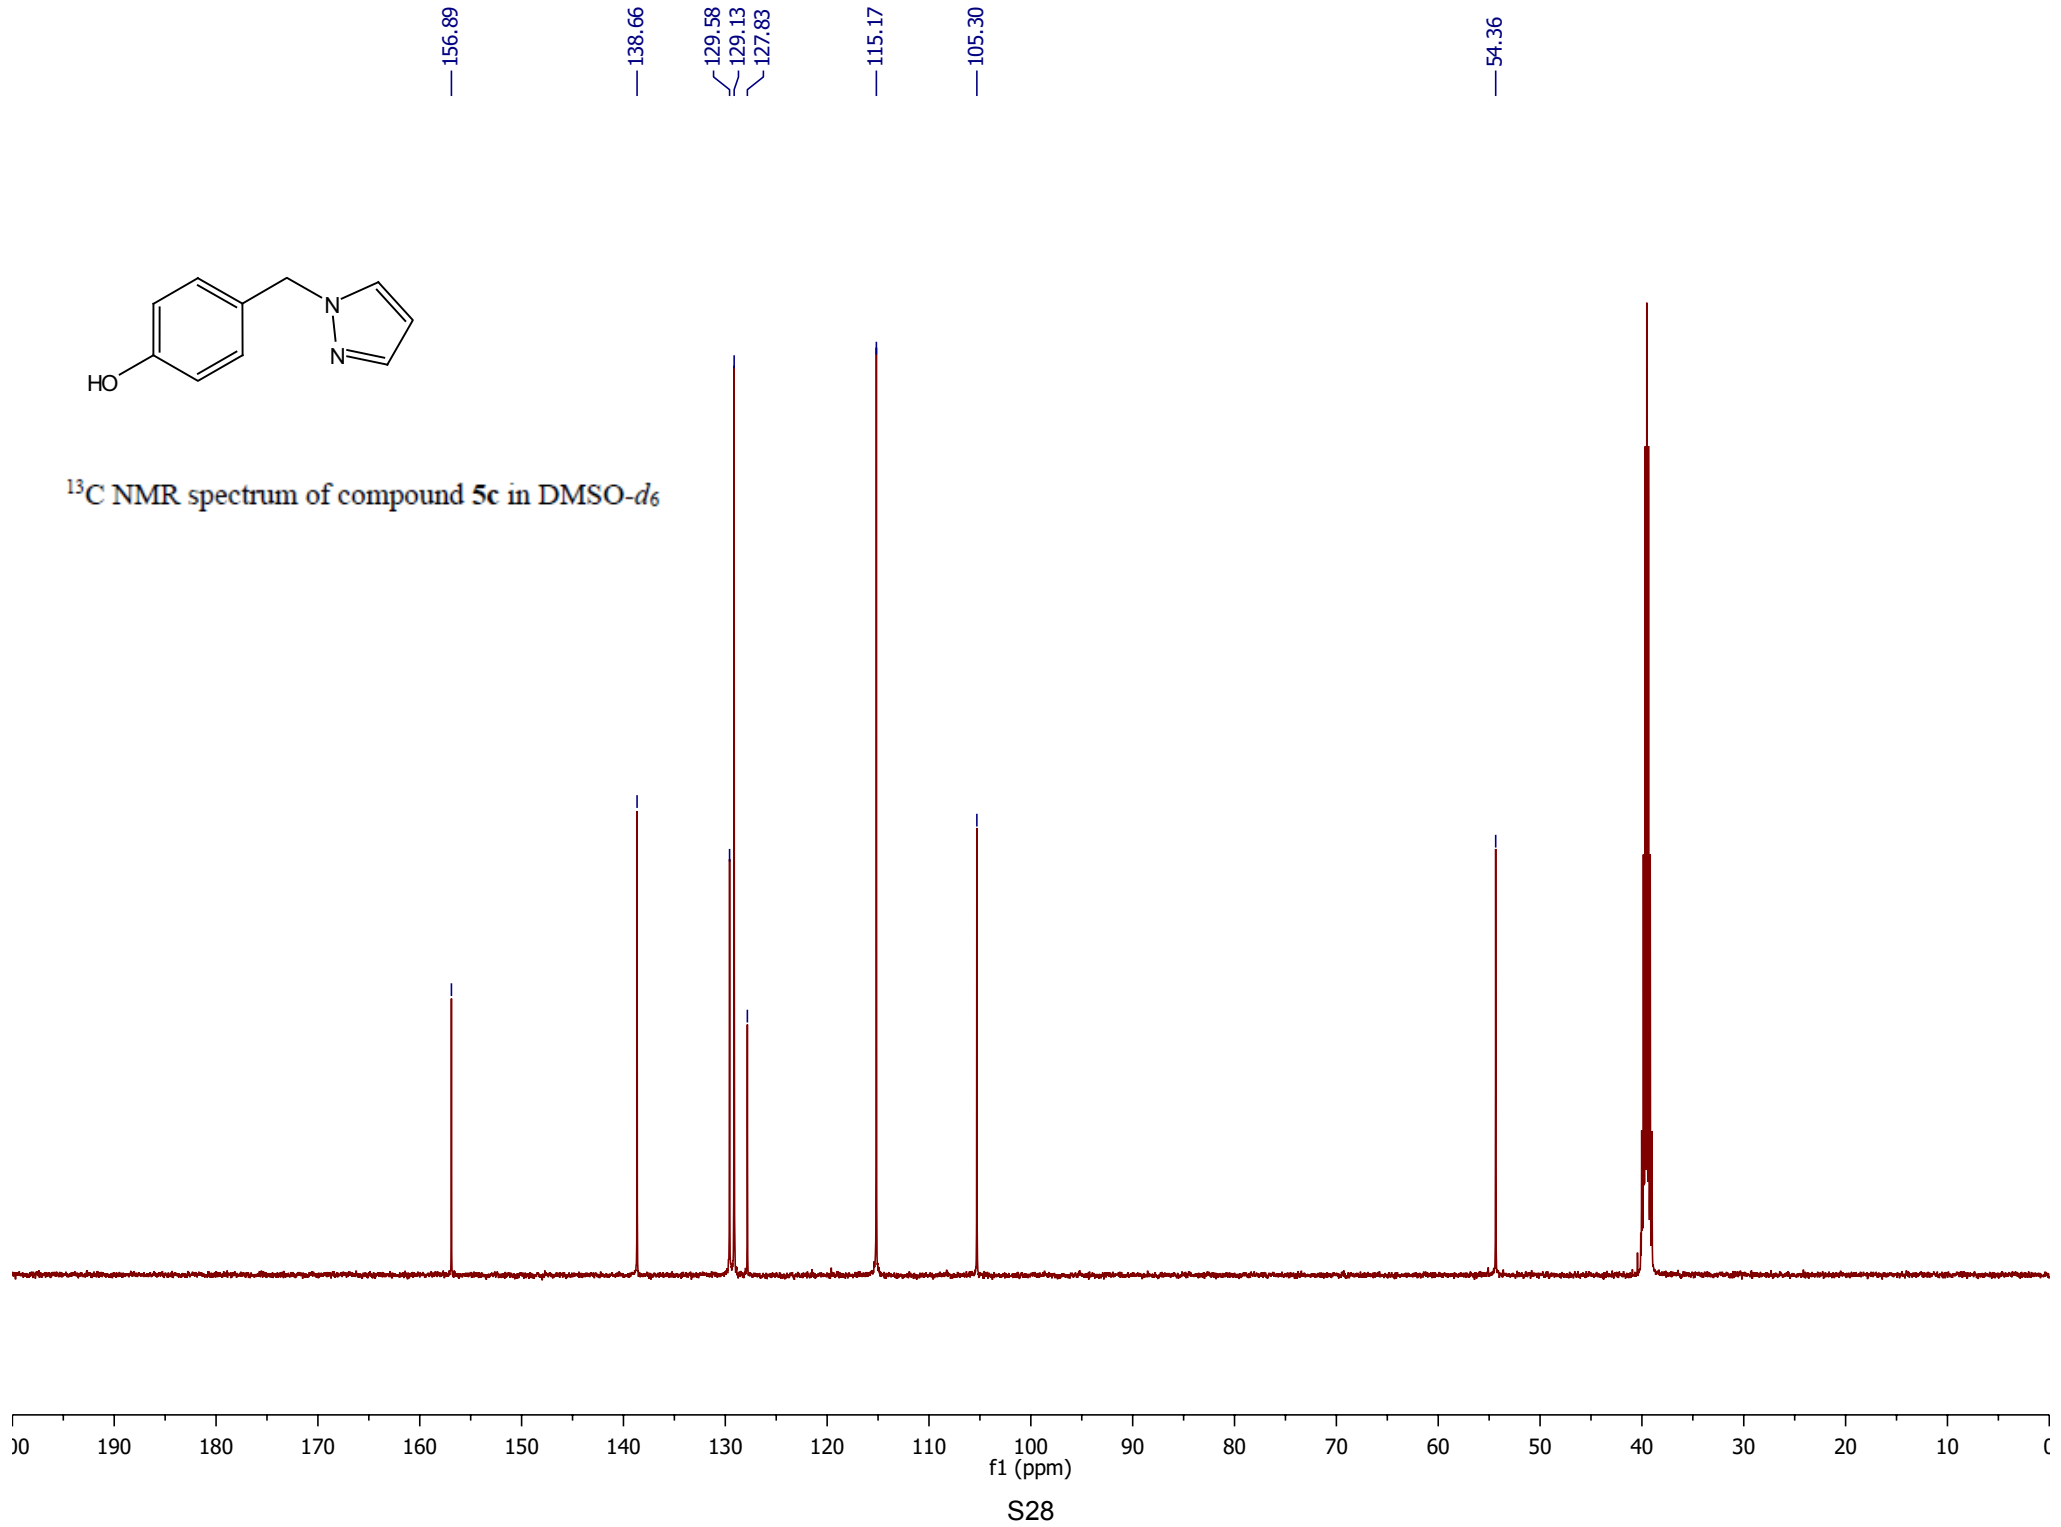

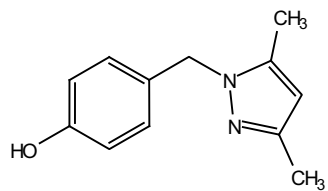

<sup>1</sup>H NMR spectrum of compound 5d in DMSO-*d*<sub>6</sub>

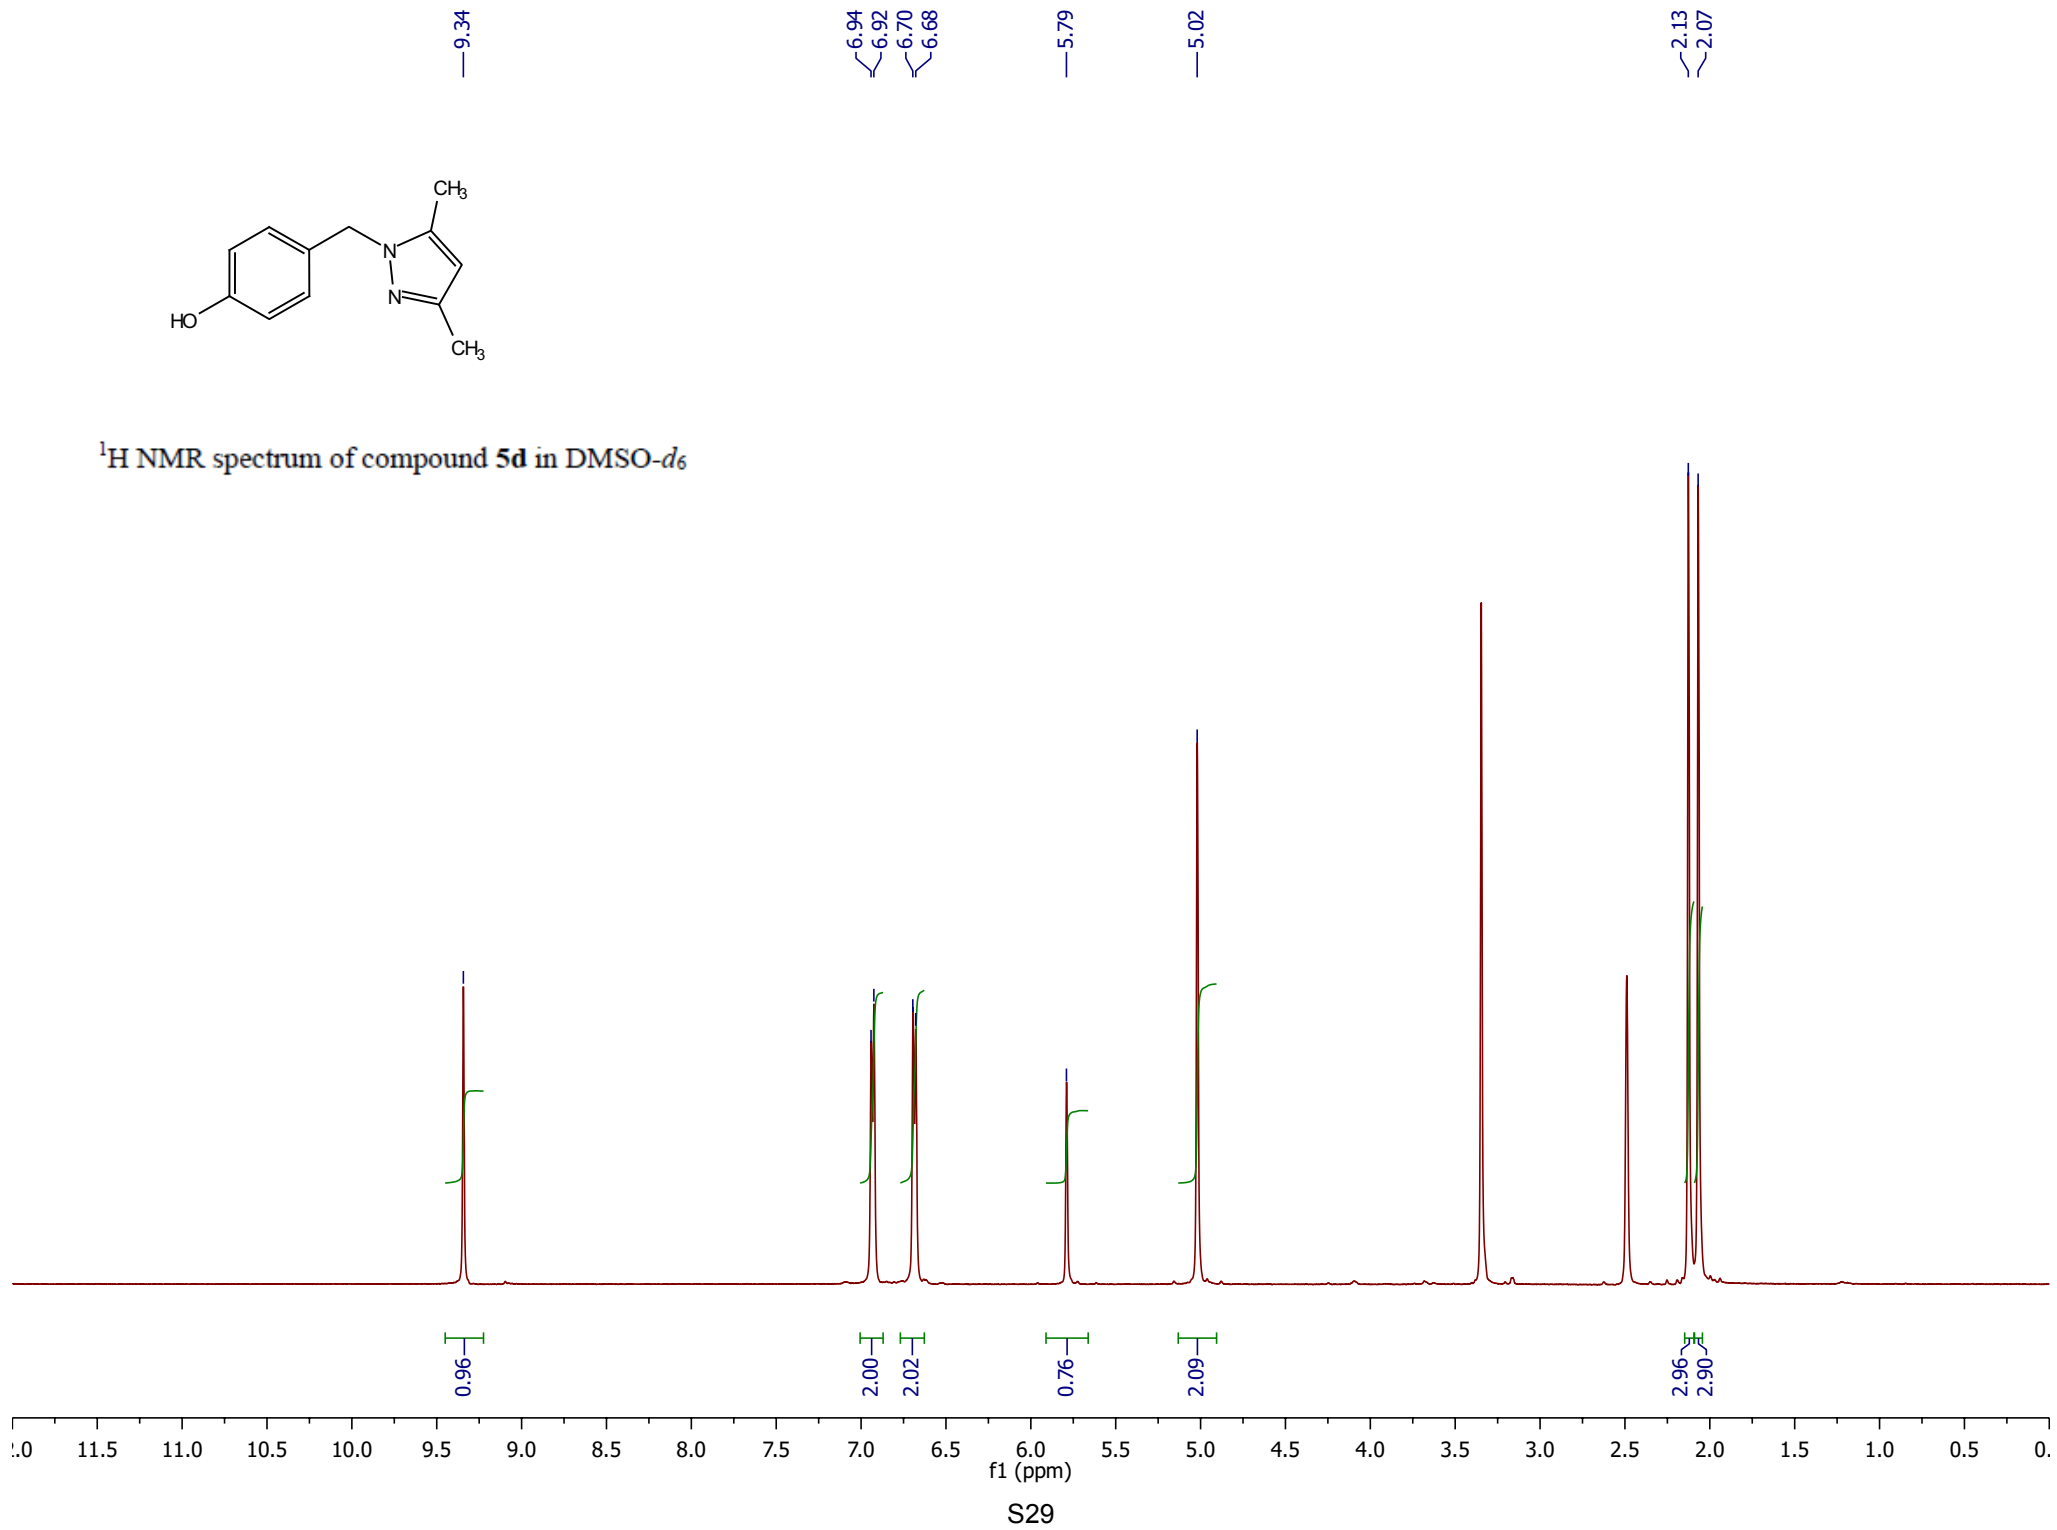



— 156.59

— 145.67

— 138.33

< 128.33  
> 128.05

— 115.20

— 104.89

— 51.22

— 13.35  
— 10.71

$^{13}\text{C}$  NMR spectrum of compound 5d in DMSO- $d_6$

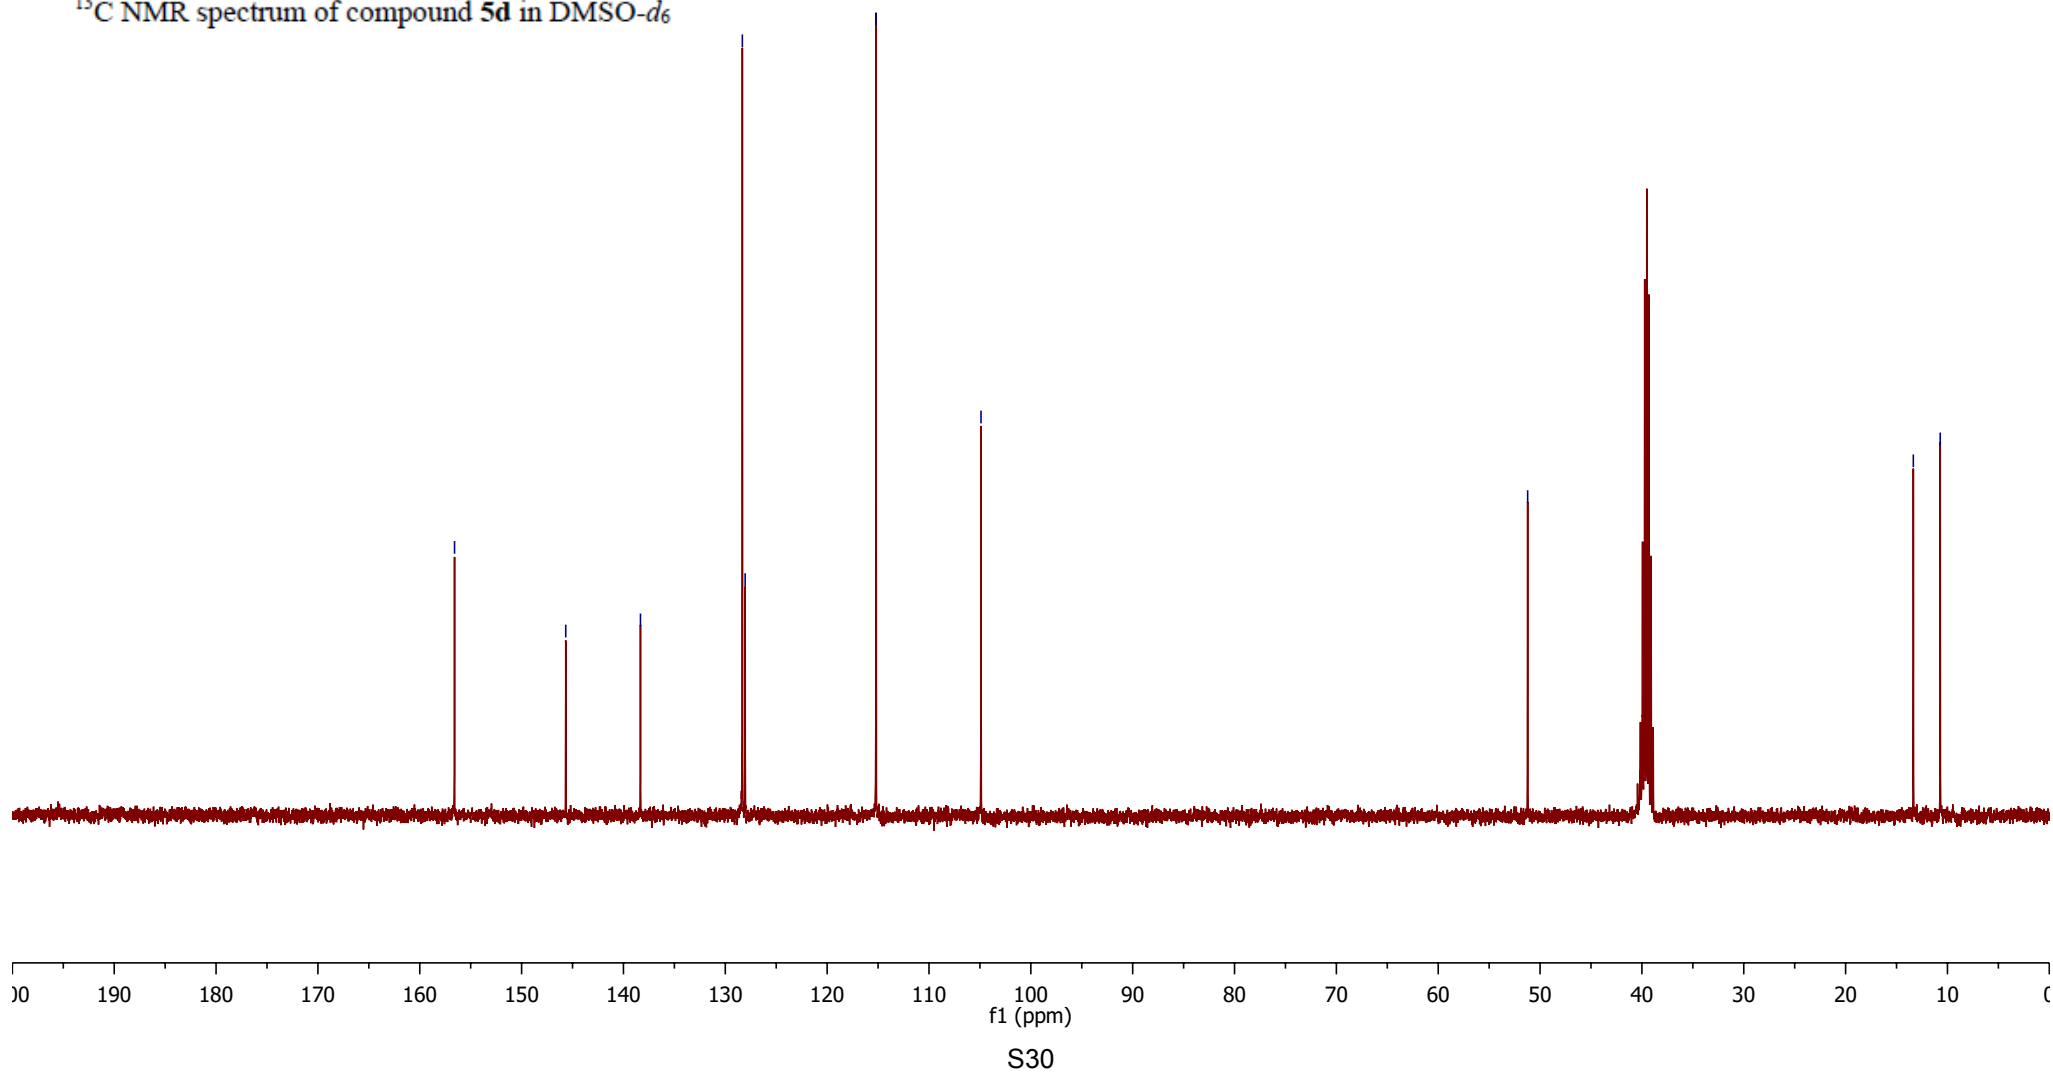

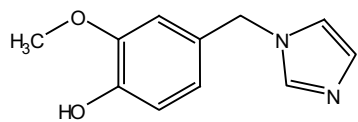

$^1\text{H}$  NMR spectrum of compound 5e in  $\text{DMSO-}d_6$

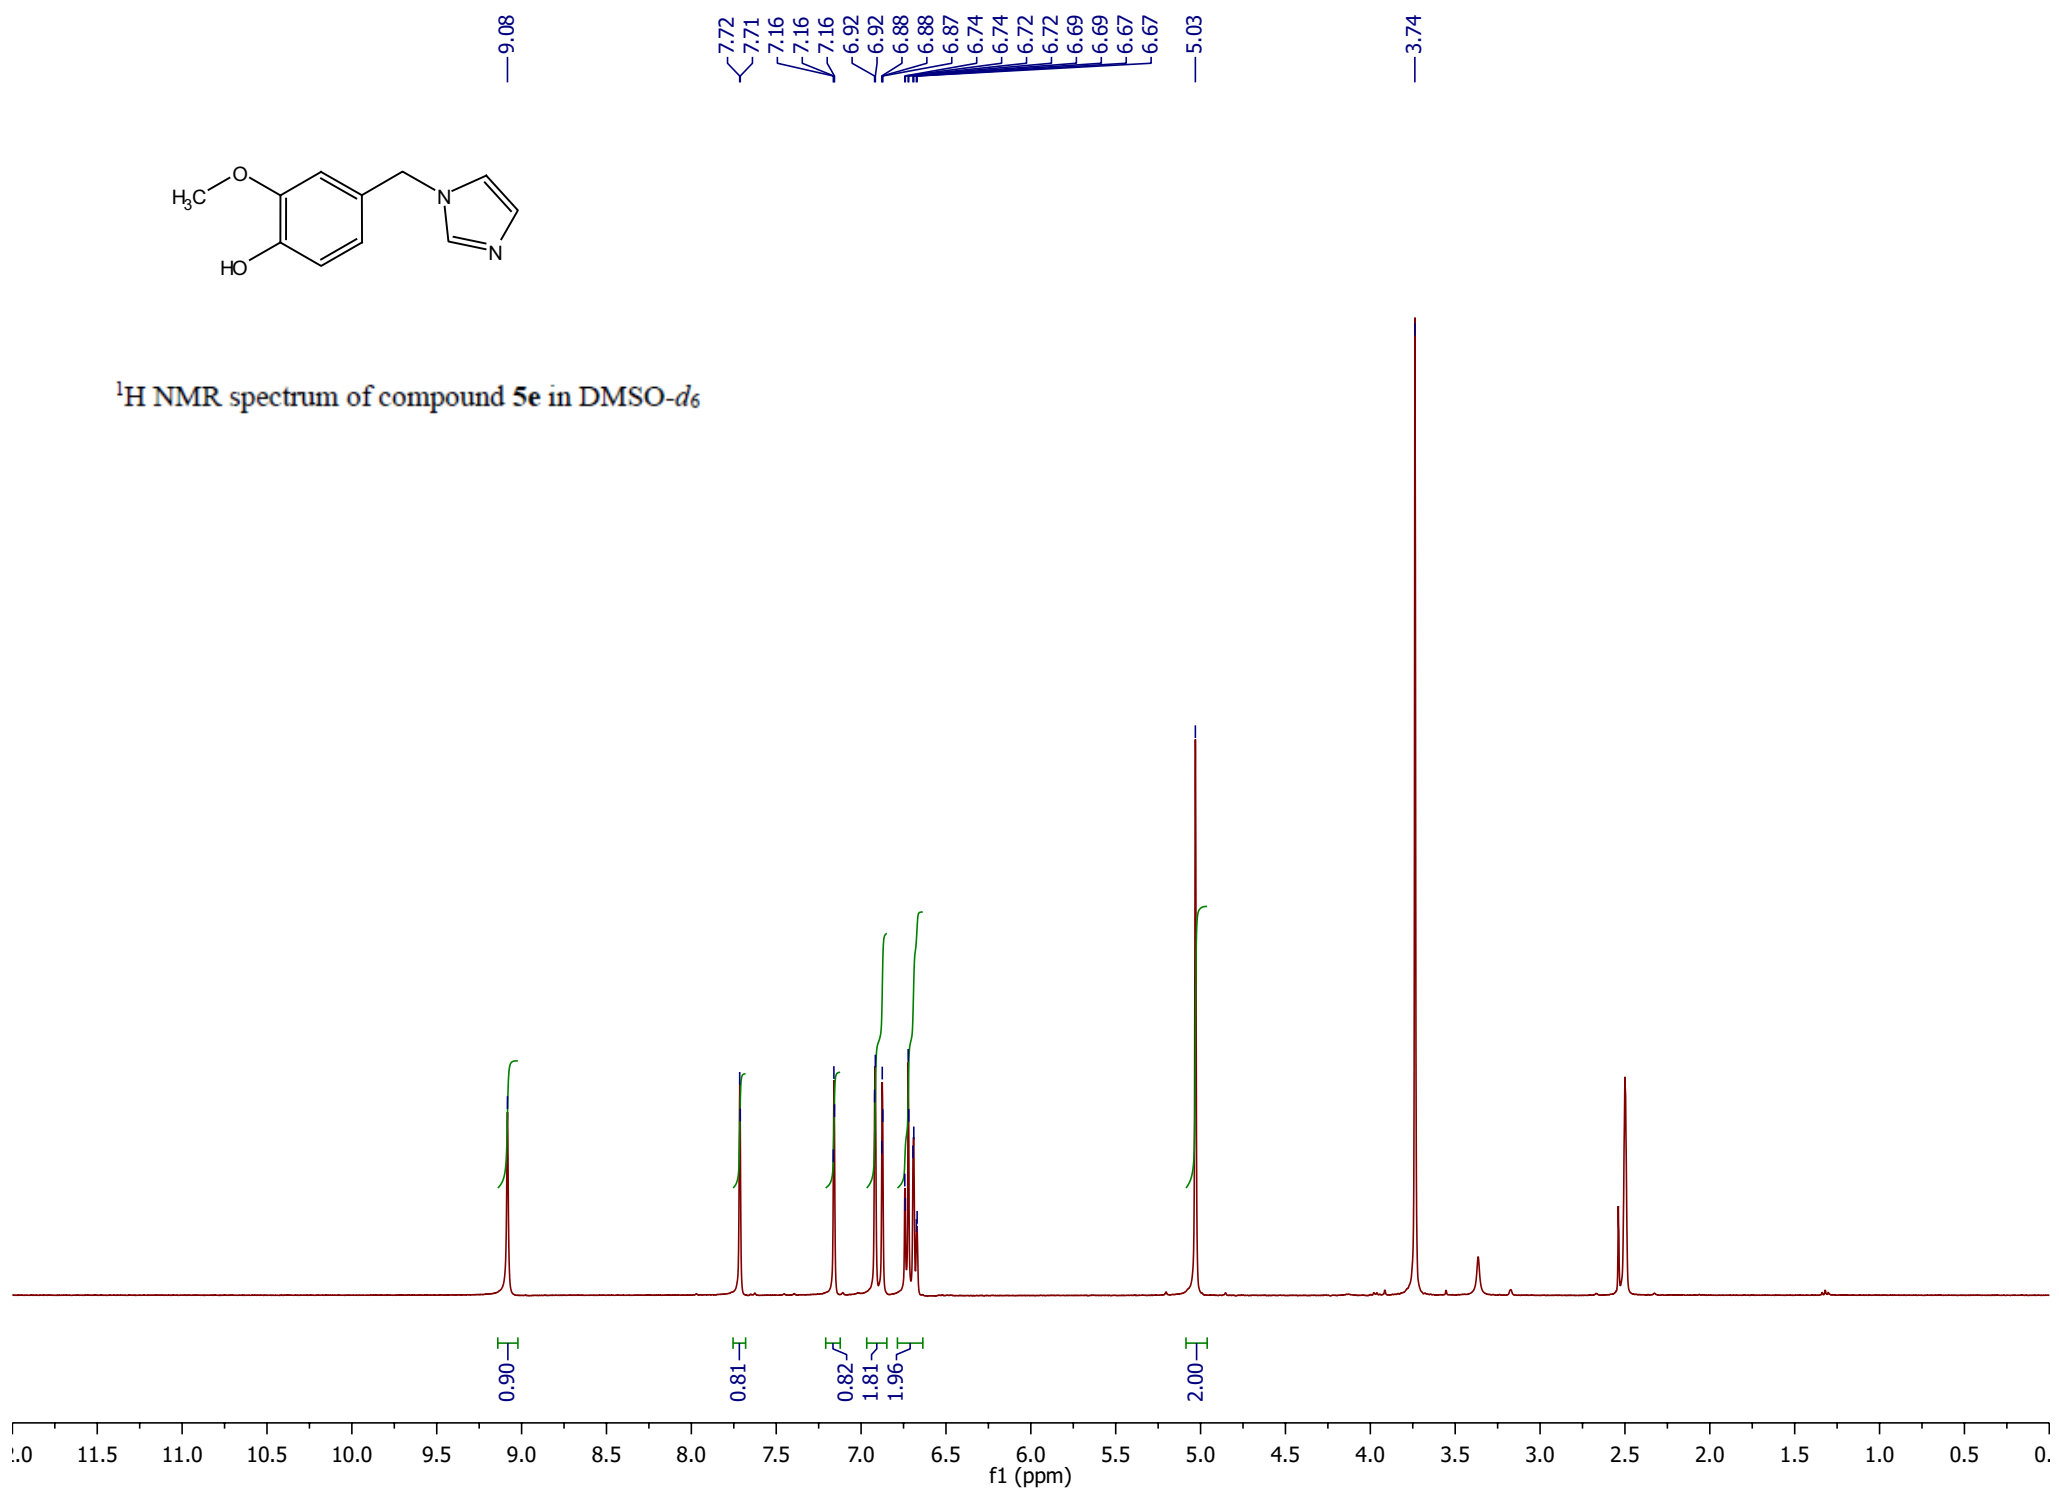

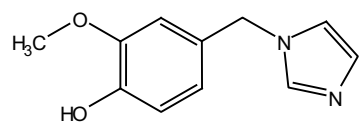

147.67  
146.31

137.18

128.48  
128.45

120.47  
119.44  
115.52  
112.21

55.63

49.54

<sup>13</sup>C NMR spectrum of compound 5e in DMSO-d<sub>6</sub>

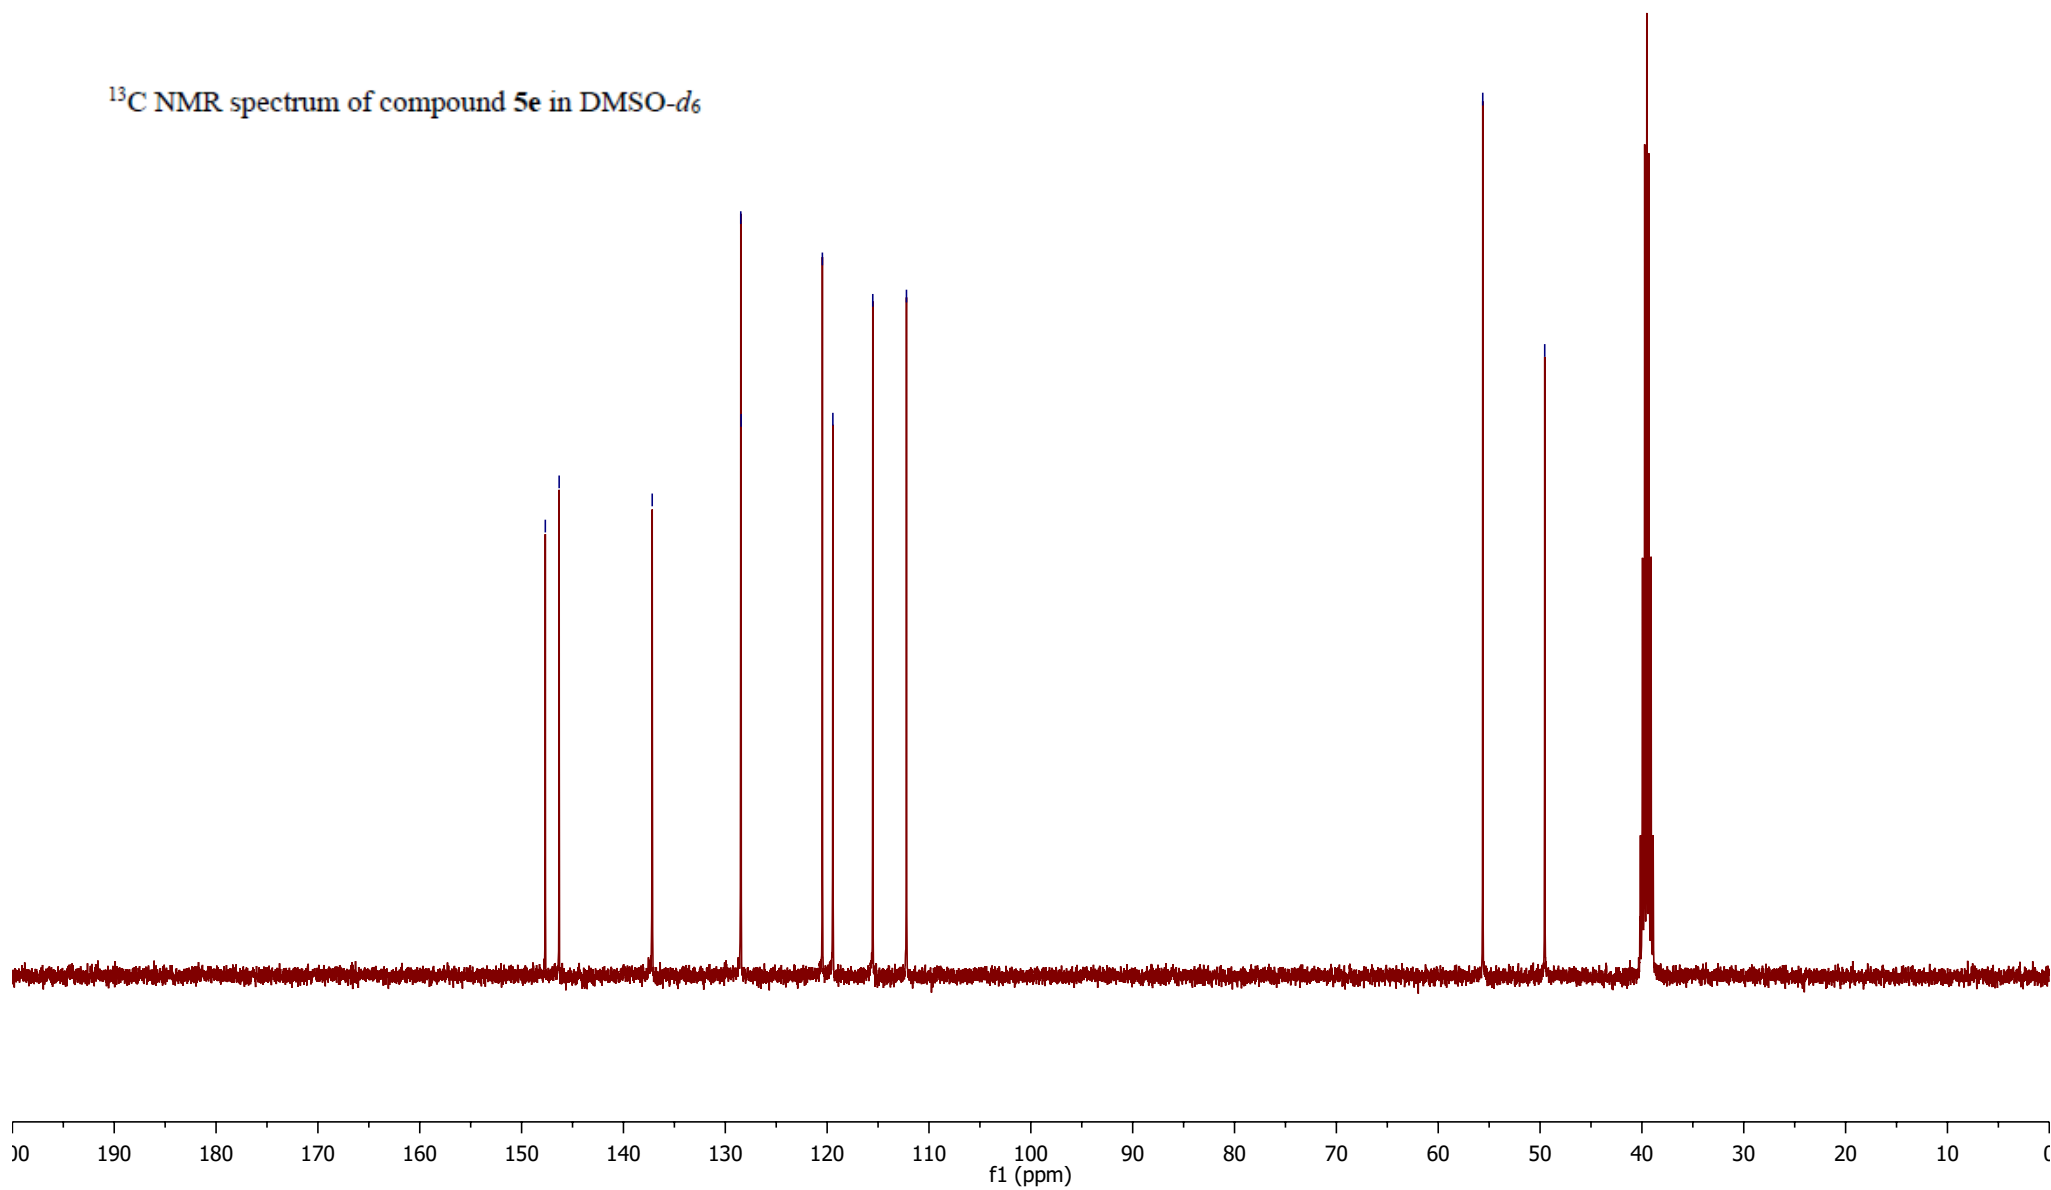



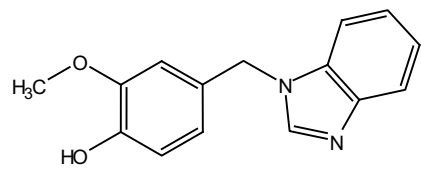

<sup>1</sup>H NMR spectrum of compound 5f in DMSO-d<sub>6</sub>

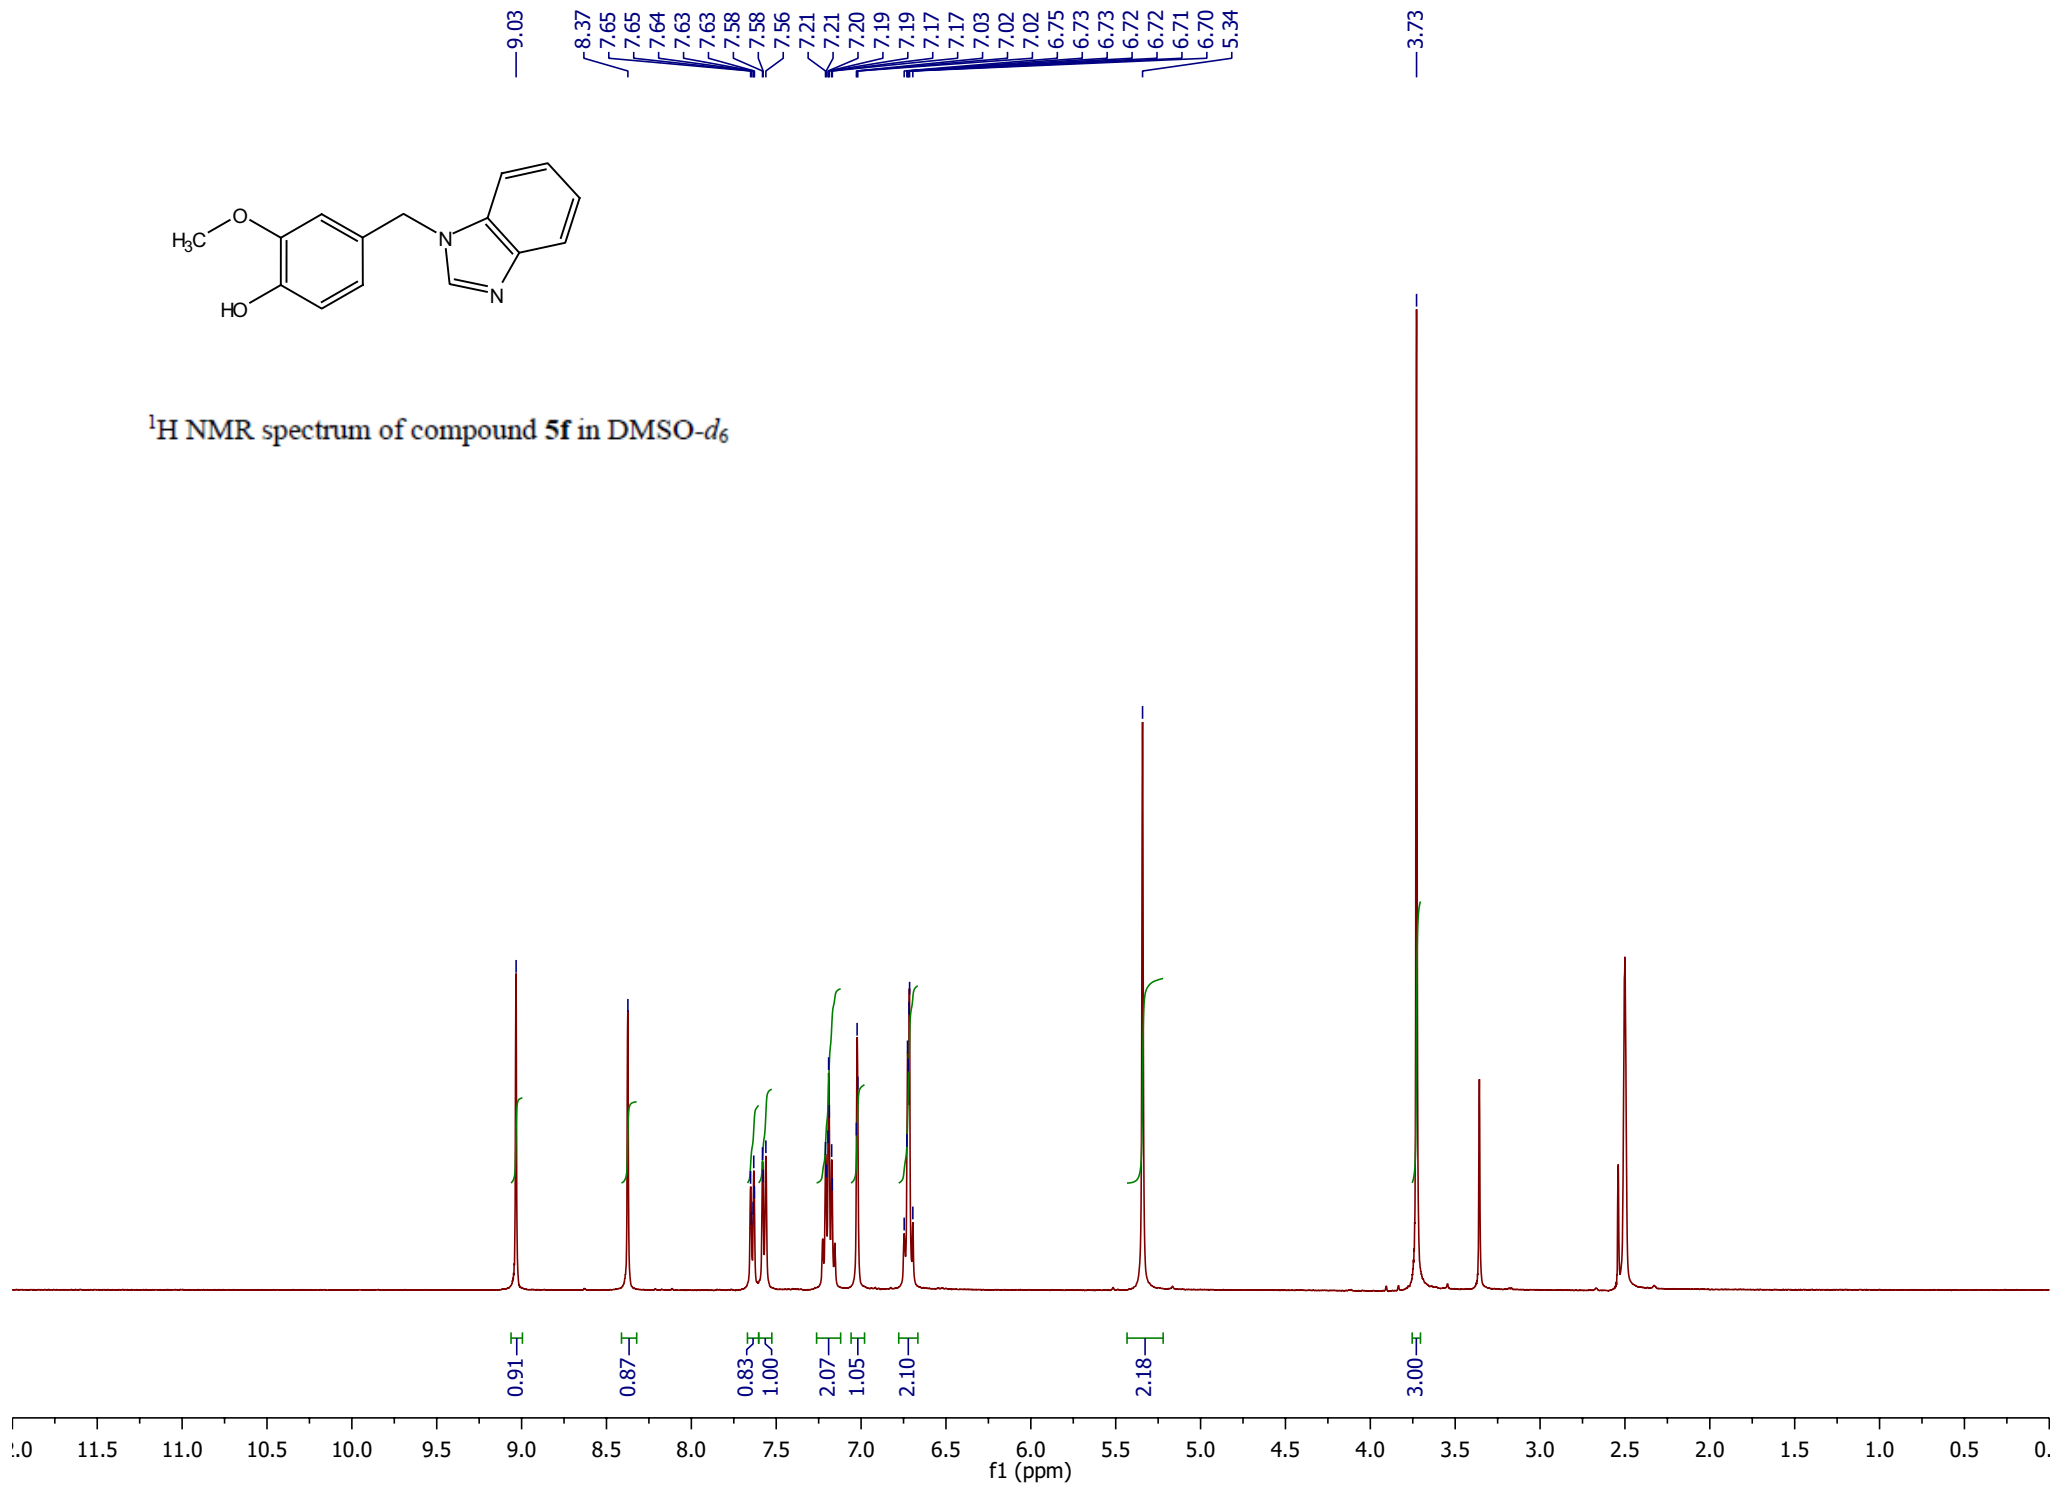

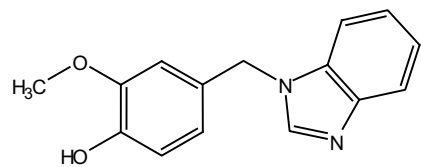

$^{13}\text{C}$  NMR spectrum of compound 5f in  $\text{DMSO-}d_6$

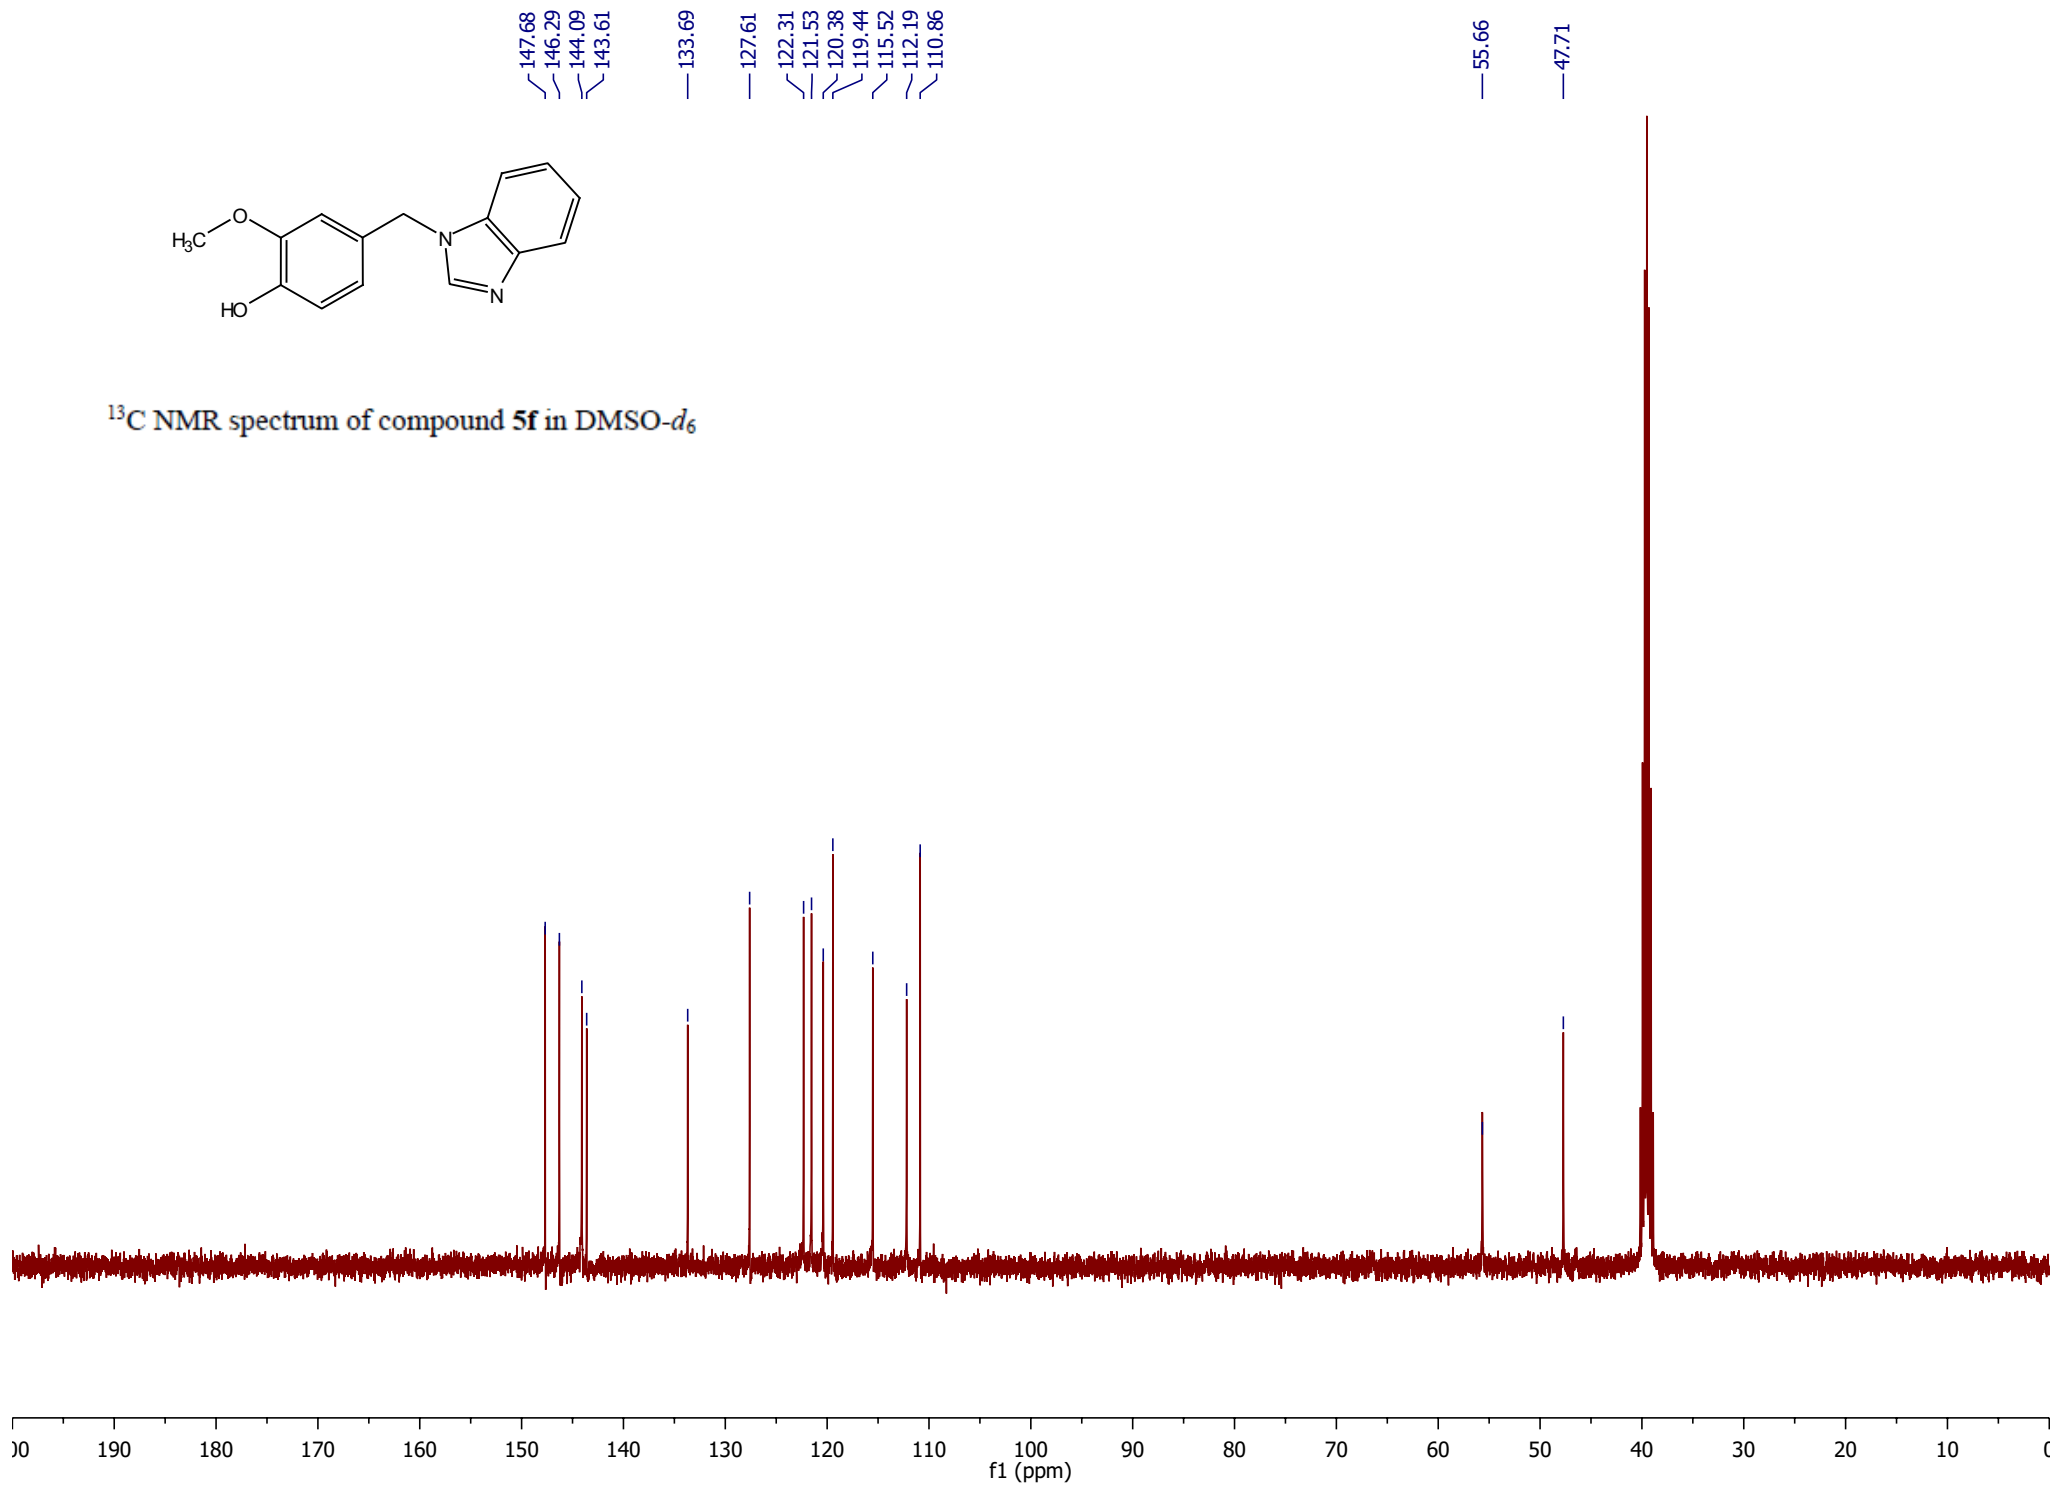

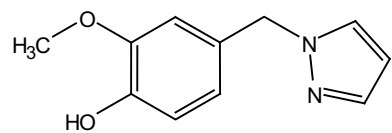

8.91

7.72

7.43

6.87

6.73

6.71

6.66

6.64

6.23

5.18

3.72

<sup>1</sup>H NMR spectrum of compound 5g in DMSO-*d*<sub>6</sub>

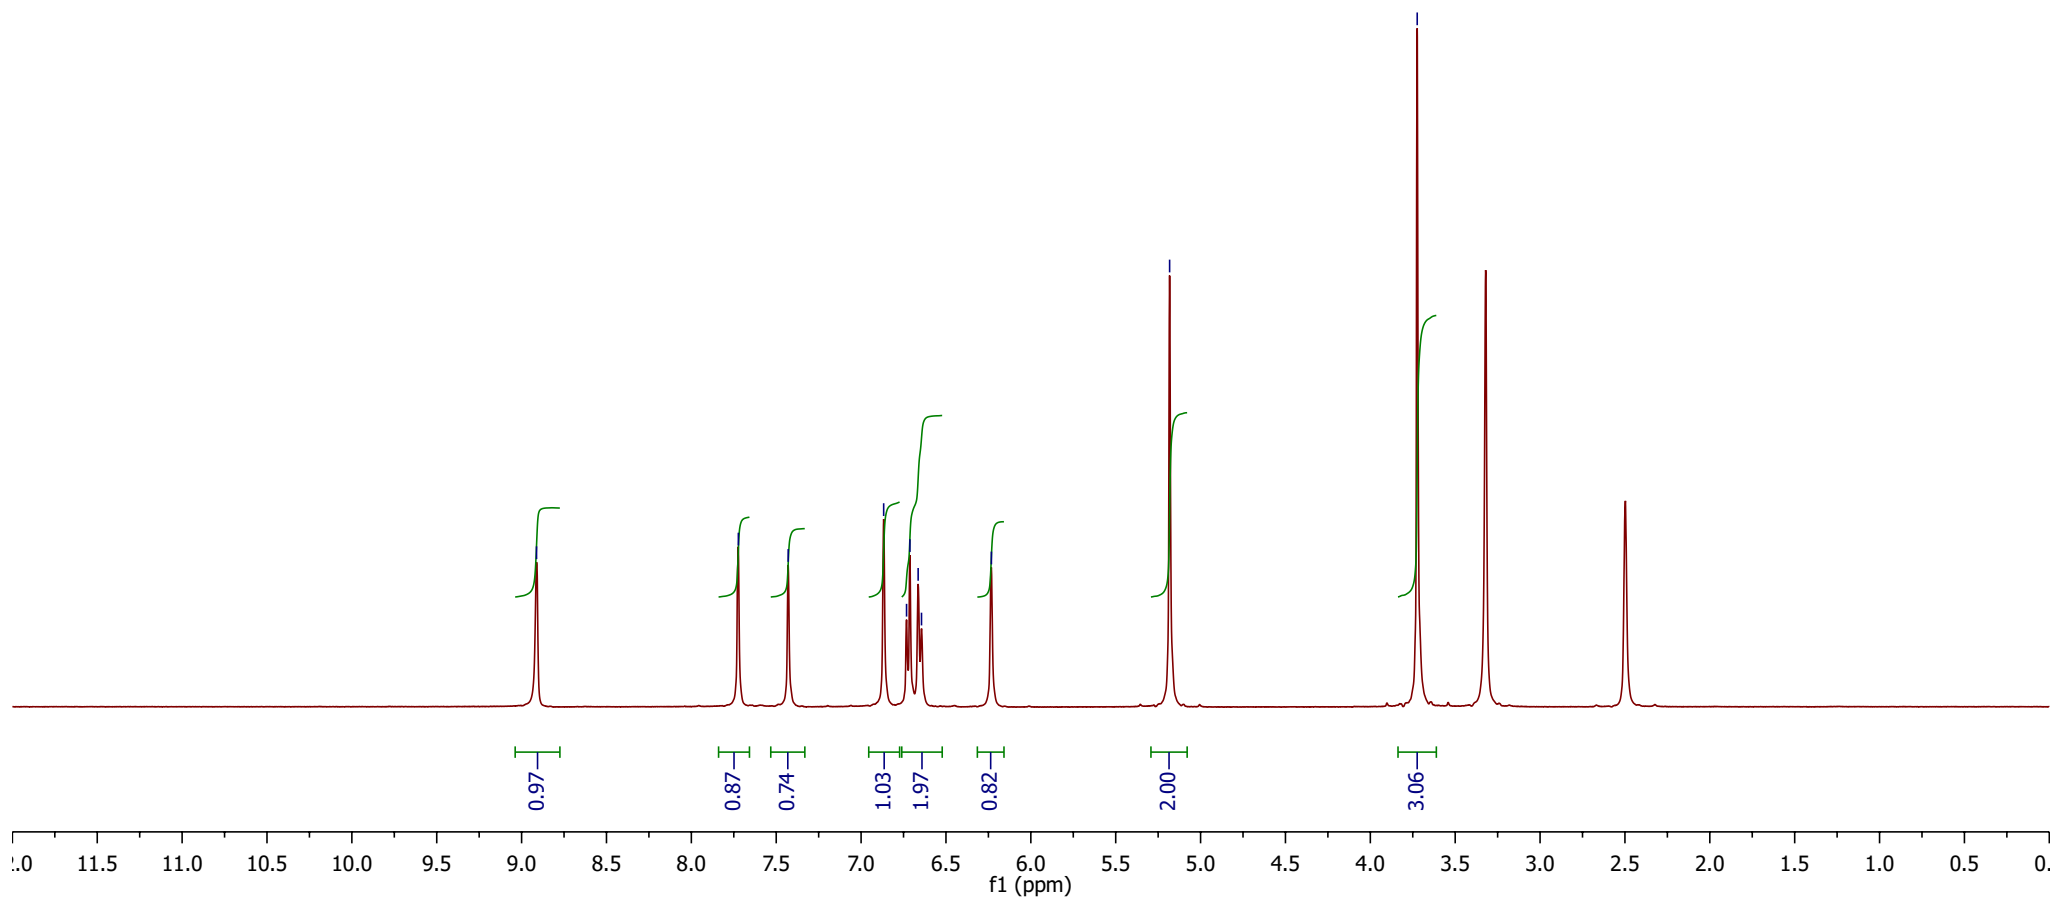

S35

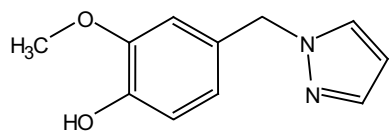

147.47  
146.12

138.66

129.65  
128.36

120.46

115.35

112.17

105.33

55.57  
54.67

<sup>13</sup>C NMR spectrum of compound 5g in DMSO-d<sub>6</sub>

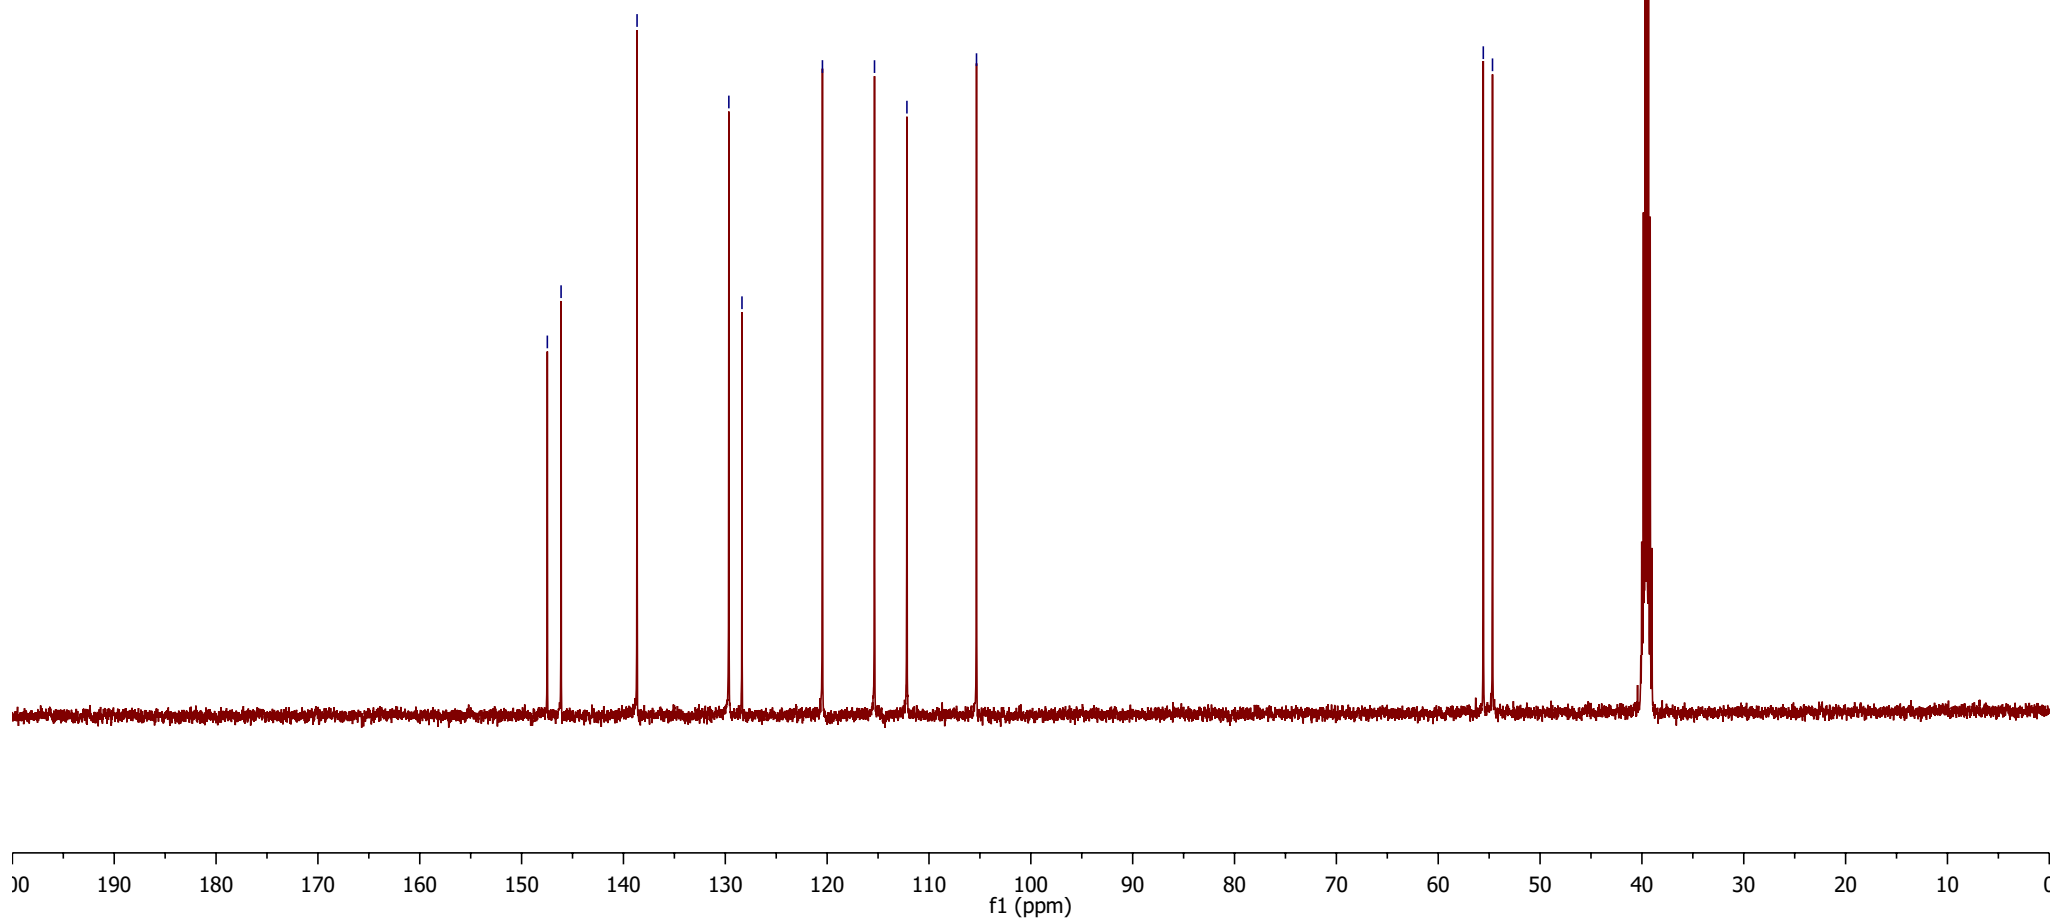

S36

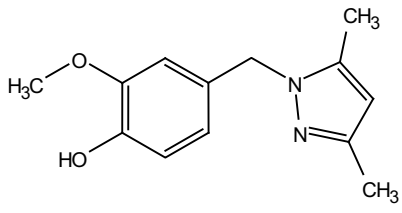

<sup>1</sup>H NMR spectrum of compound 5h in DMSO-d<sub>6</sub>

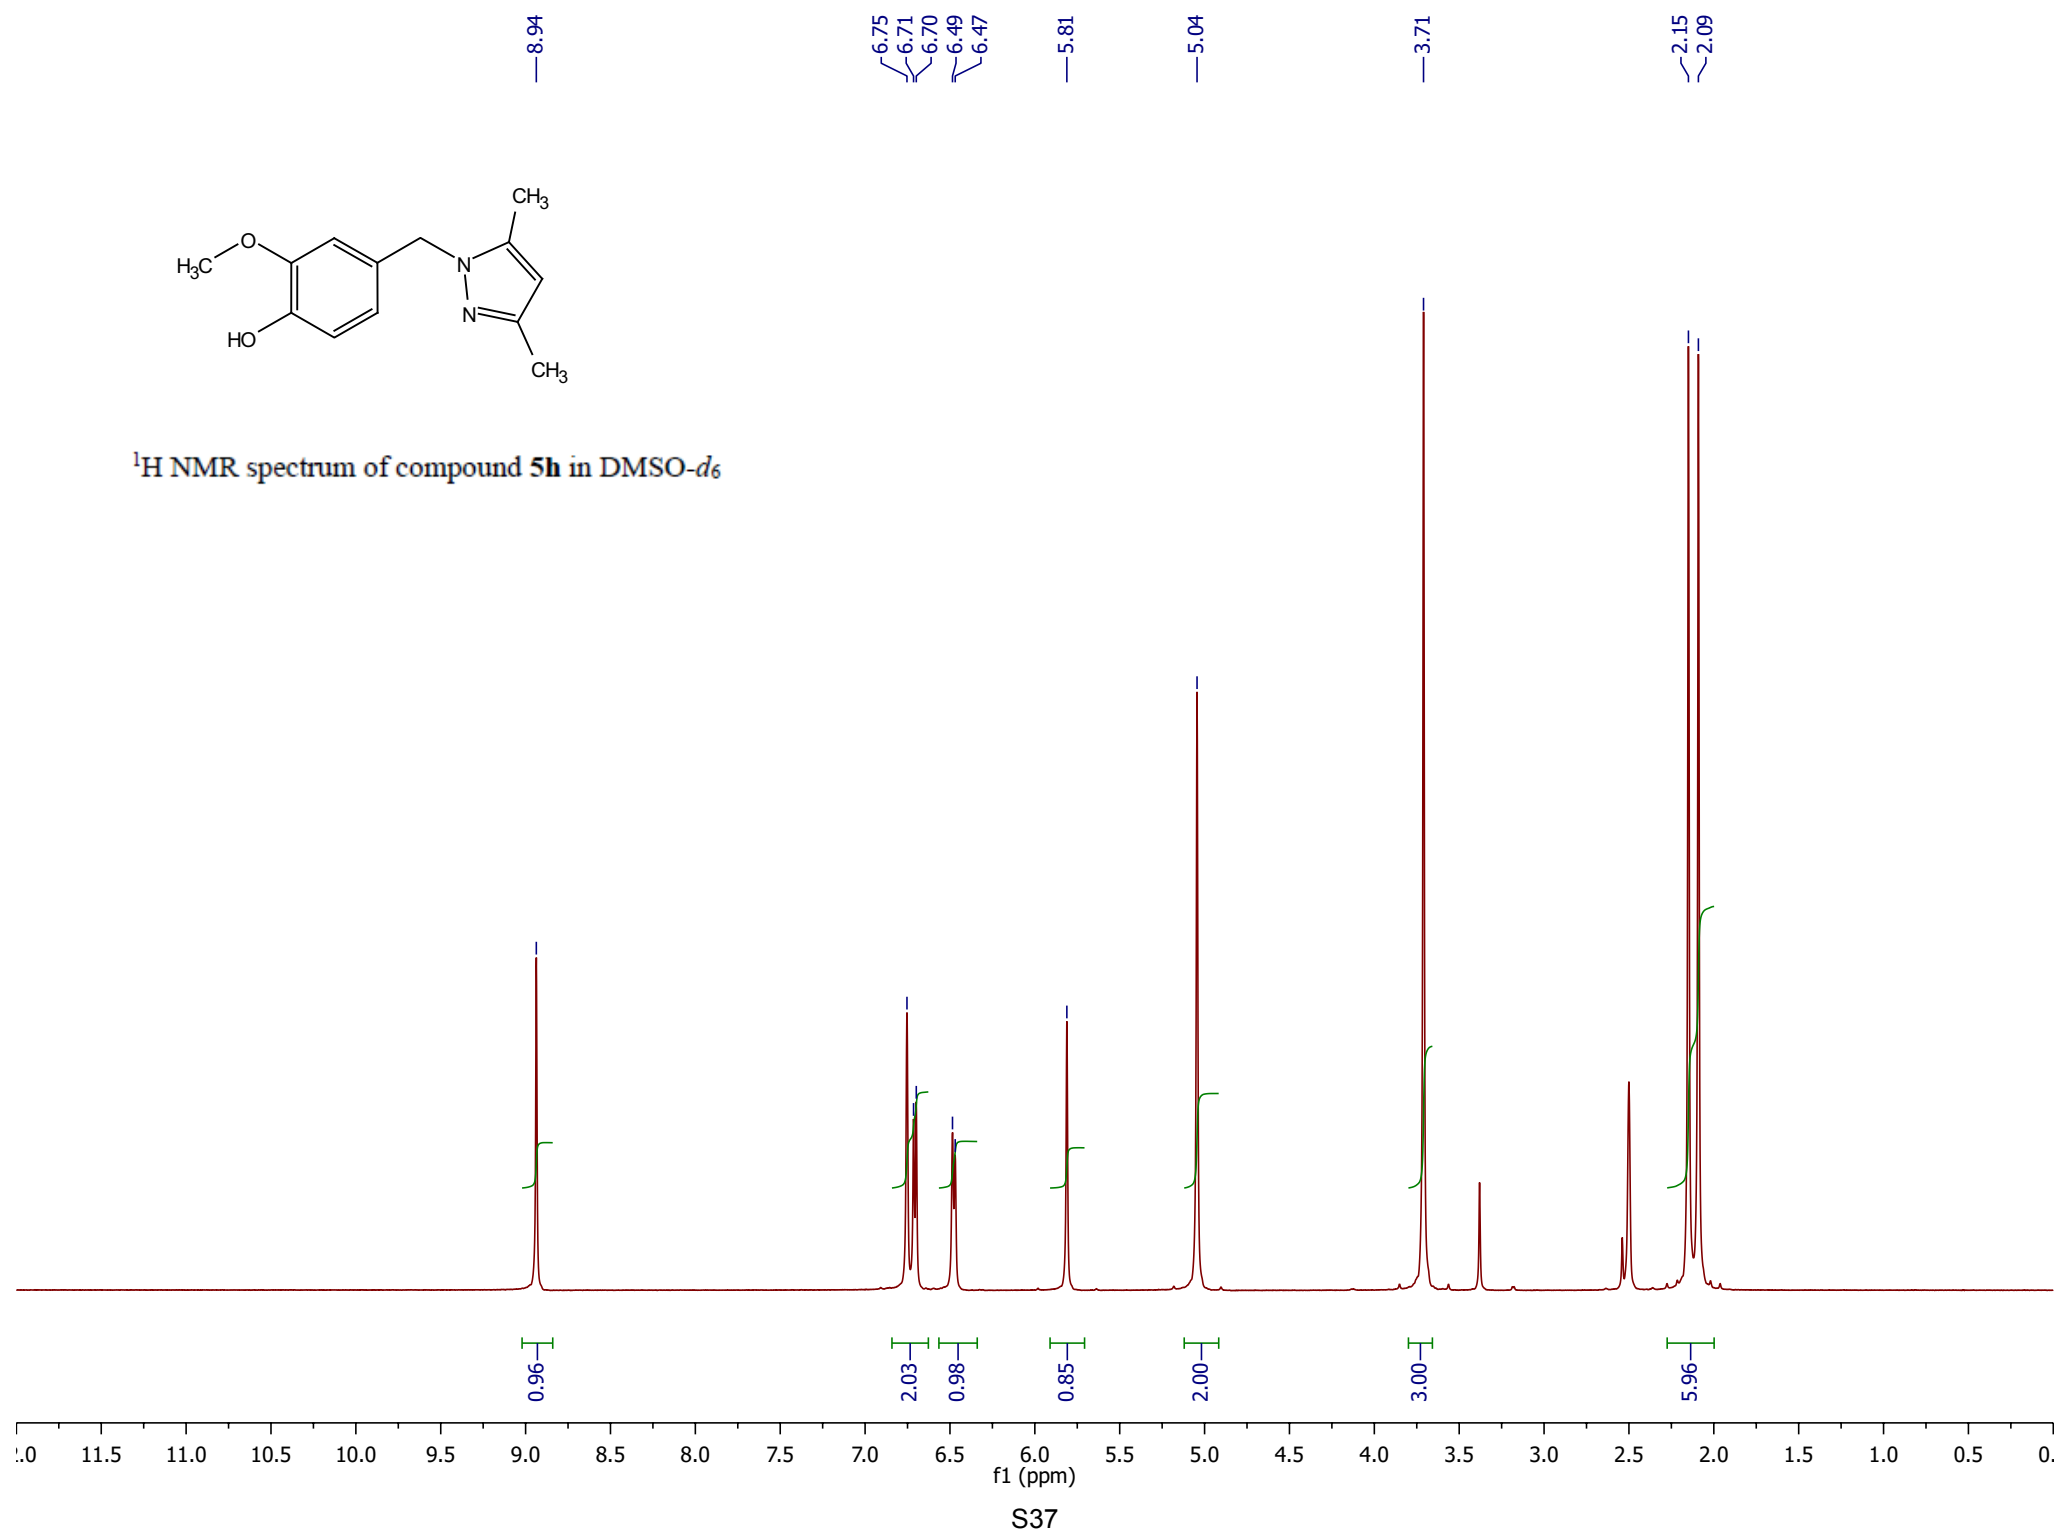

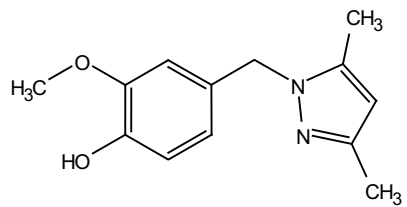

147.50  
145.79  
145.70  
138.44  
128.66  
119.48  
115.41  
111.43  
104.91

55.57  
51.48

13.35  
10.74

$^{13}\text{C}$  NMR spectrum of compound 5h in DMSO- $d_6$

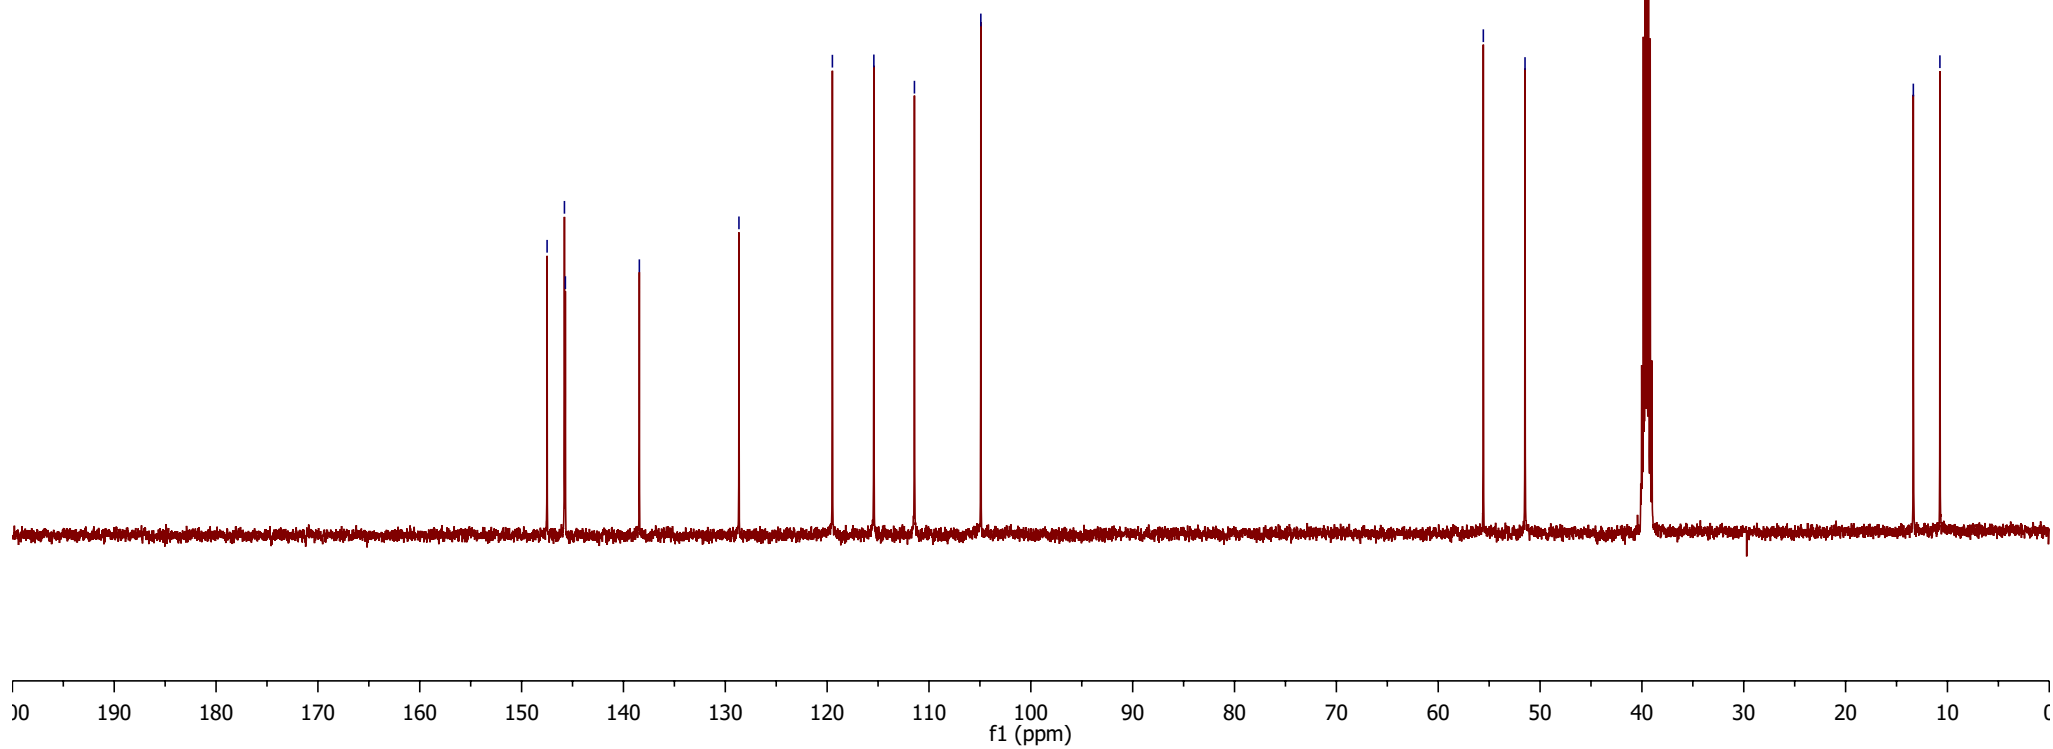

S38

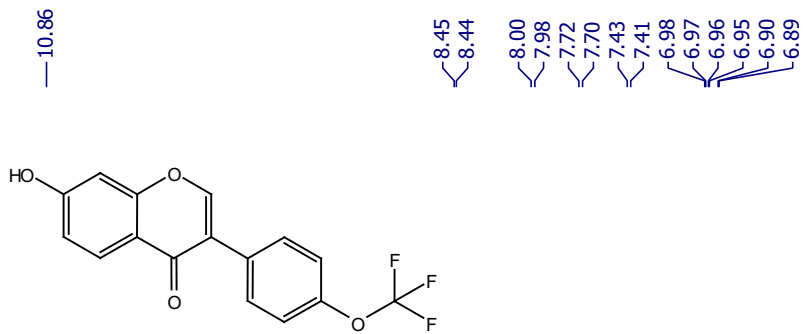

$^{13}\text{C}$  NMR spectrum of compound 6j in  $\text{DMSO-}d_6$

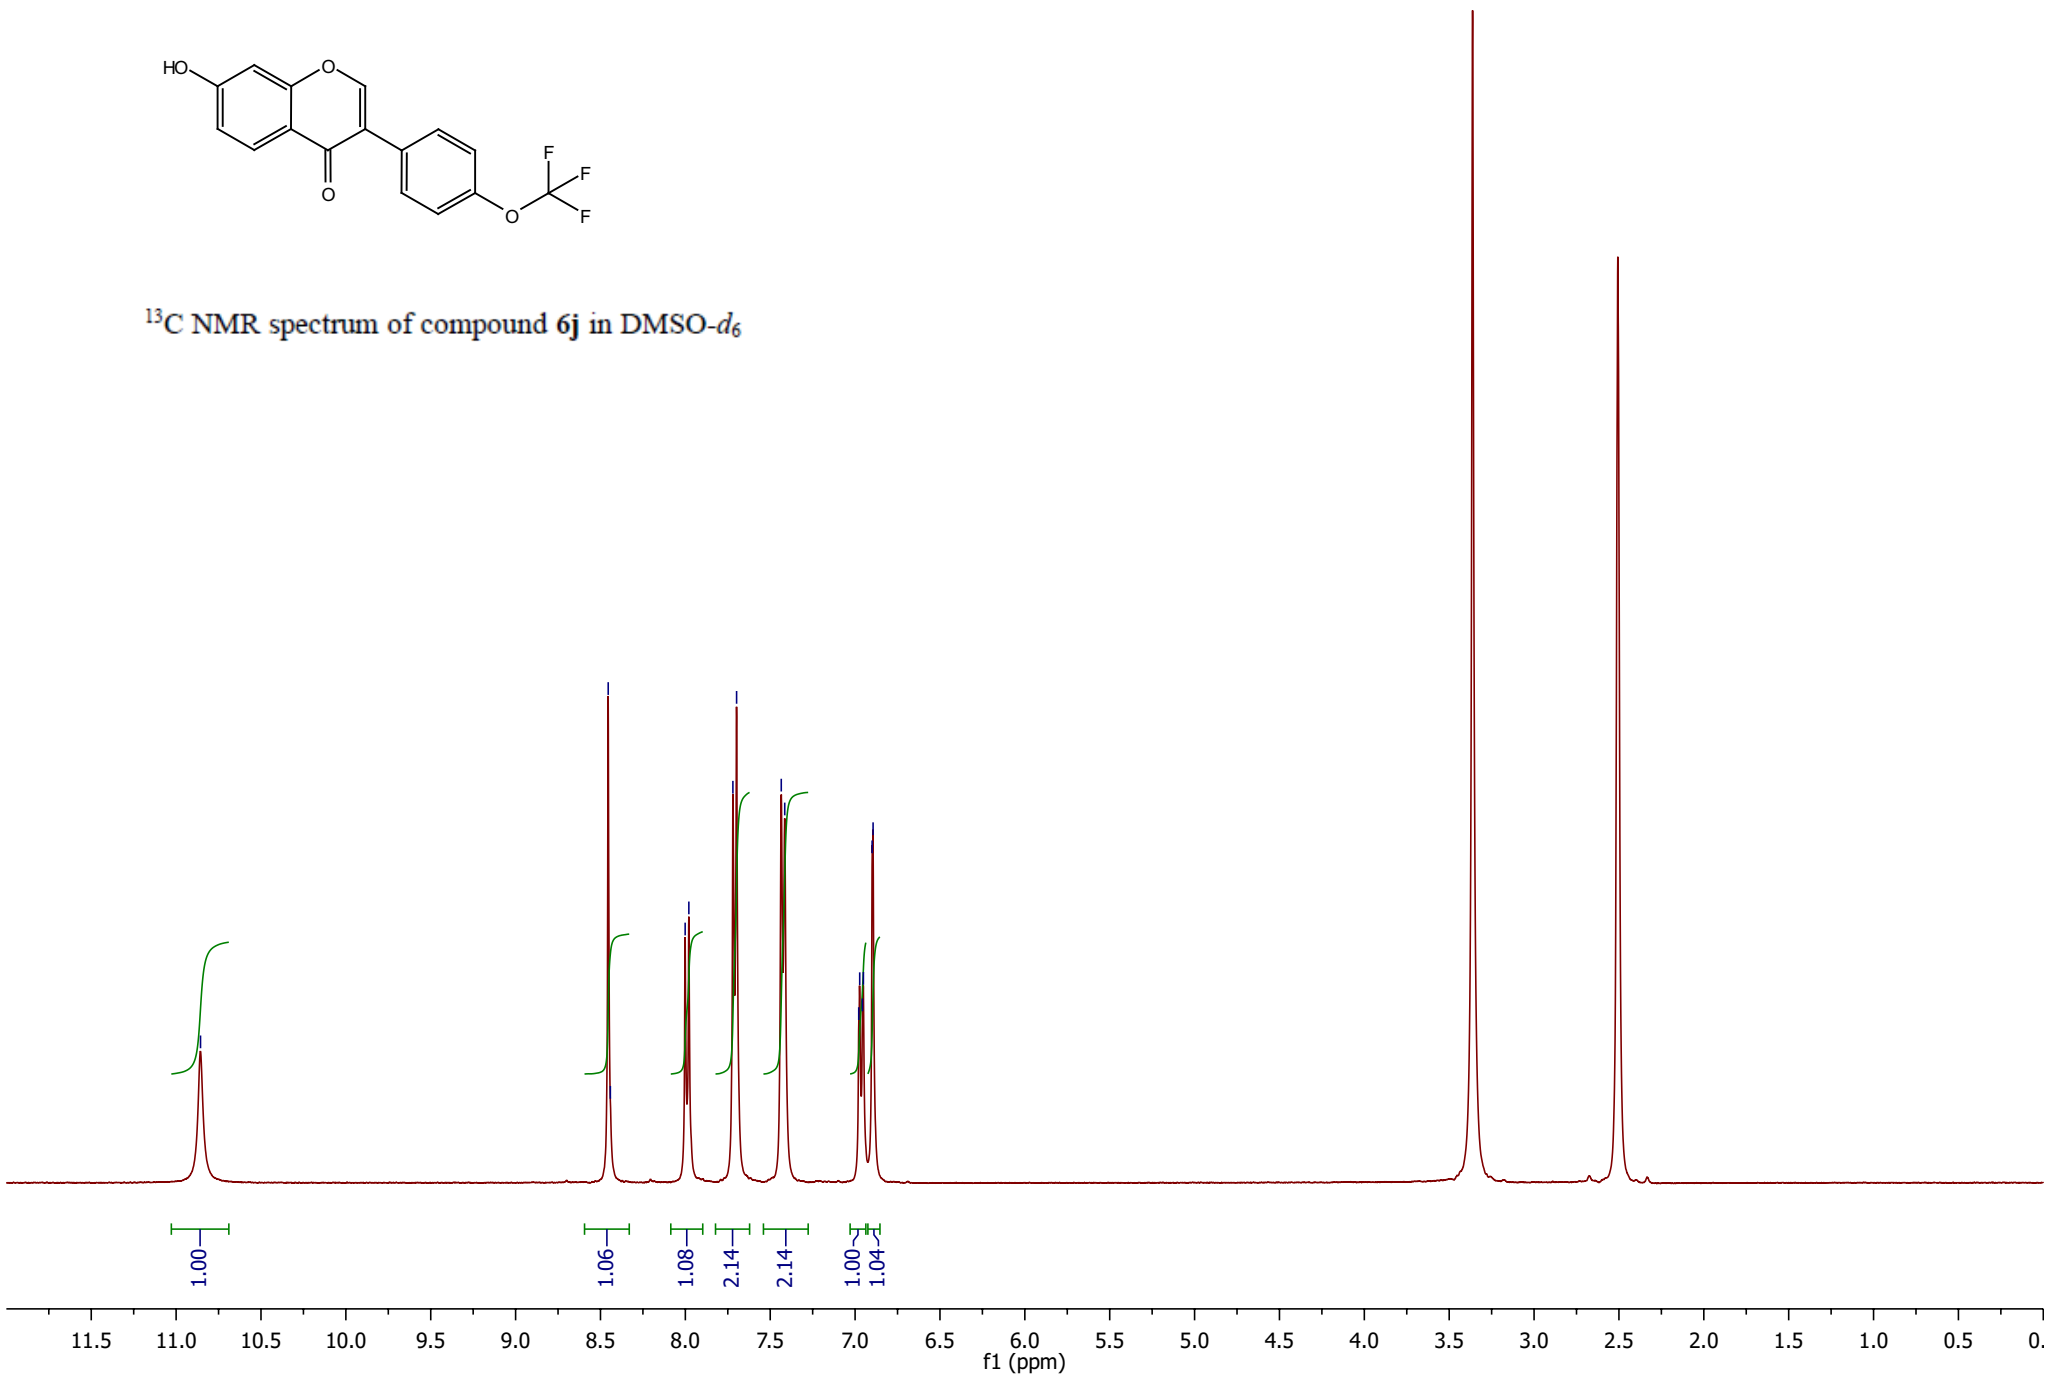

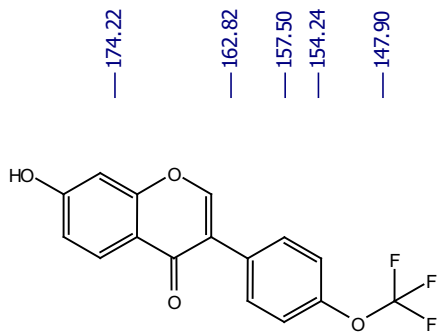

174.22  
162.82  
157.50  
154.24  
147.90  
131.53  
130.83  
127.31  
122.29  
120.71  
116.54  
115.37  
102.24

<sup>1</sup>H NMR spectrum of compound 6j in DMSO-*d*<sub>6</sub>

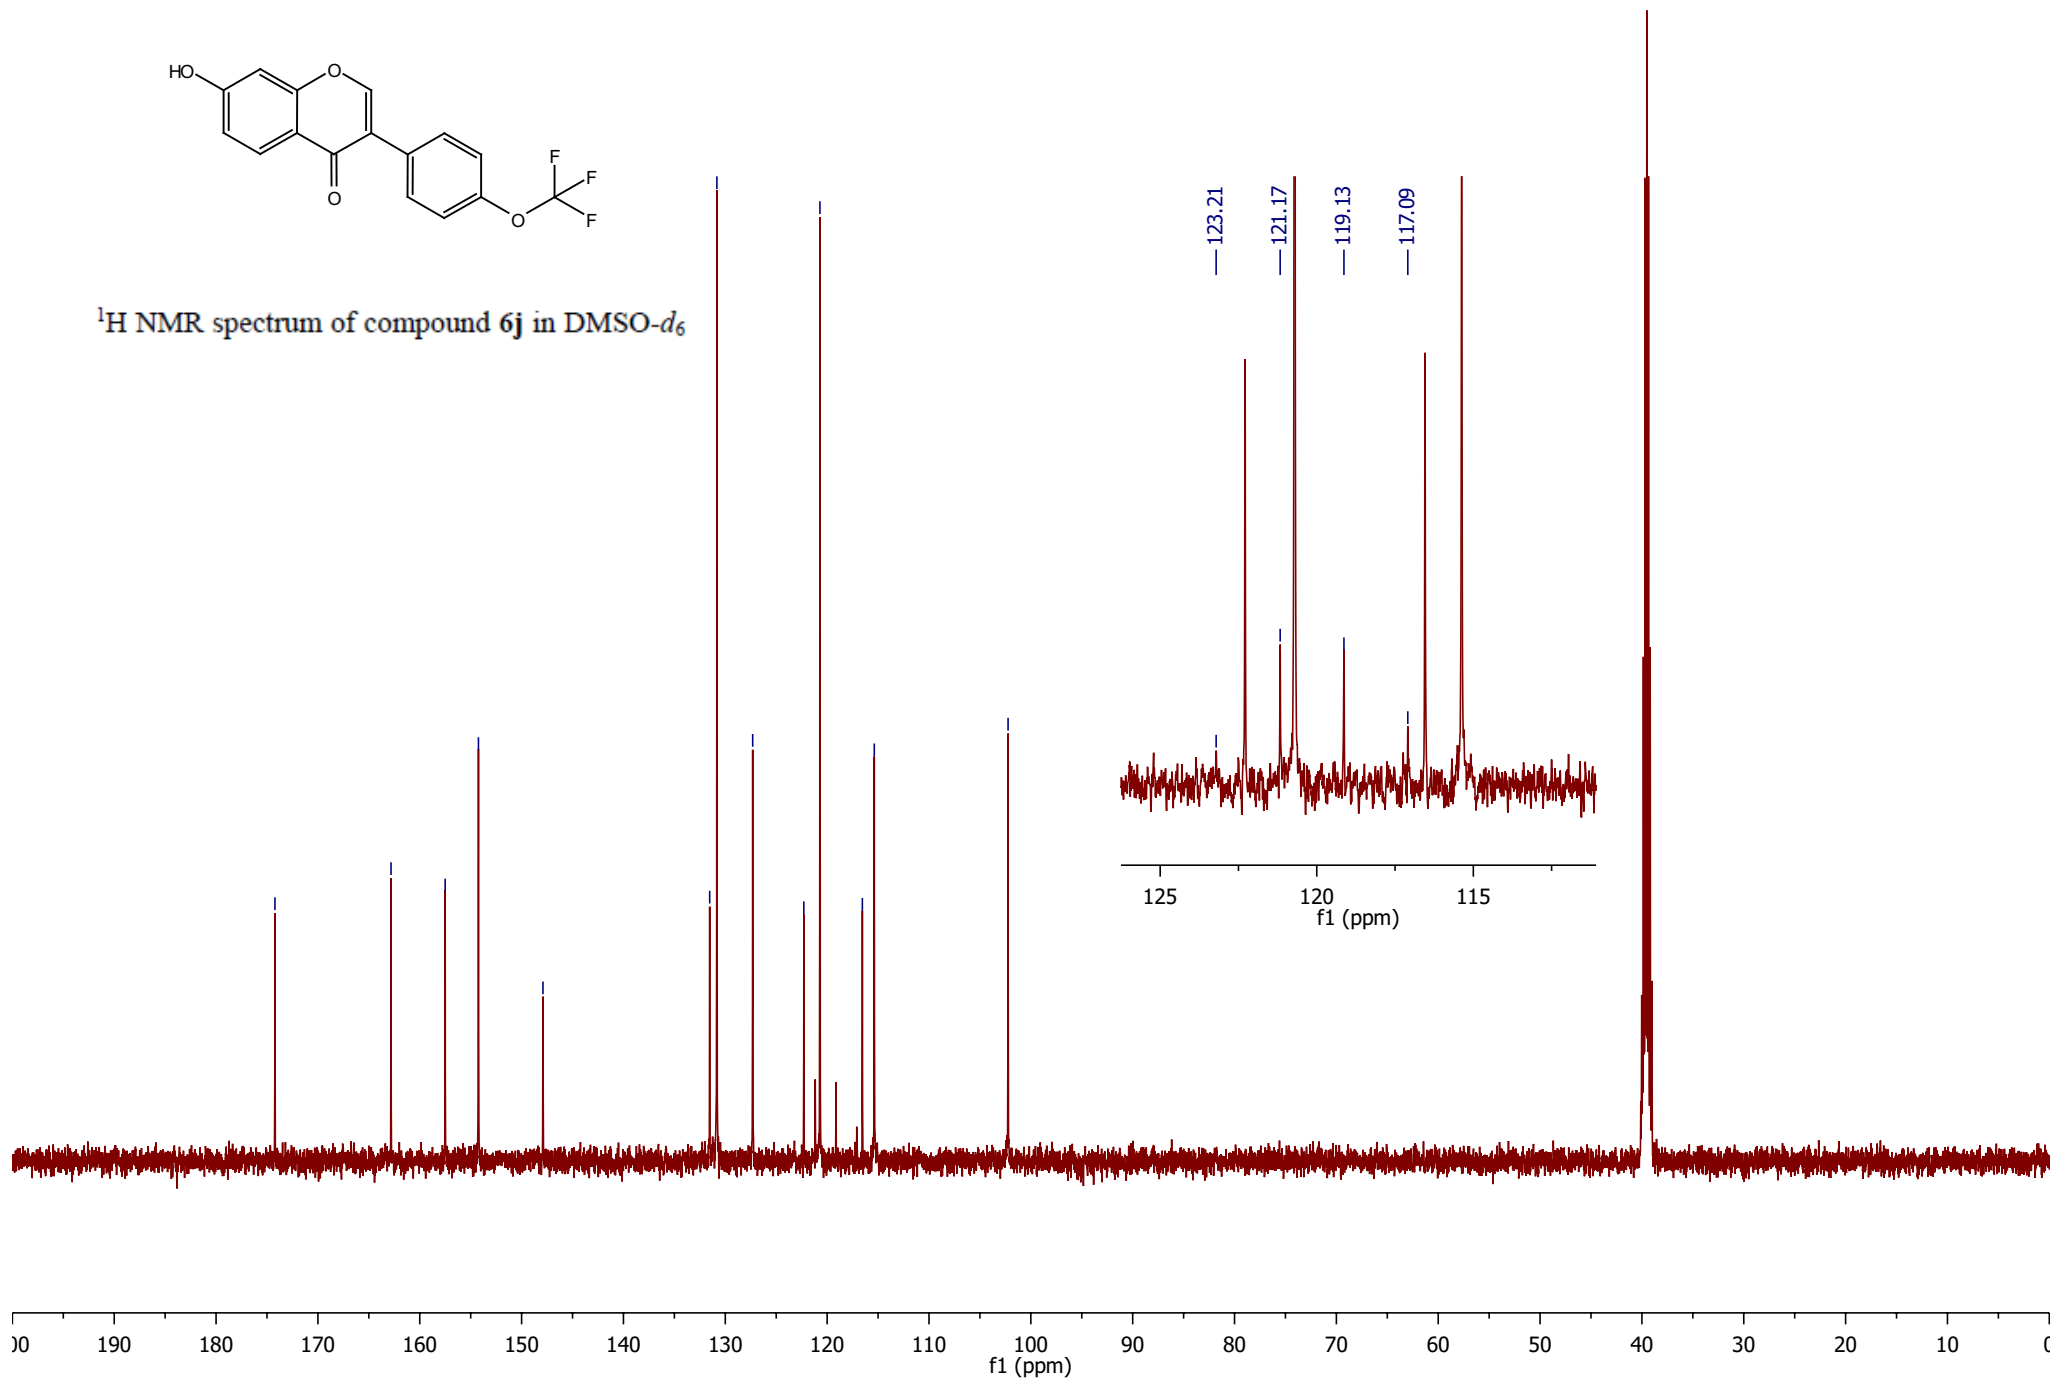



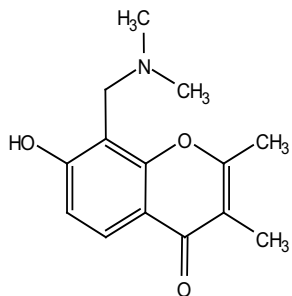

<sup>1</sup>H NMR spectrum of compound 8c in CDCl<sub>3</sub>

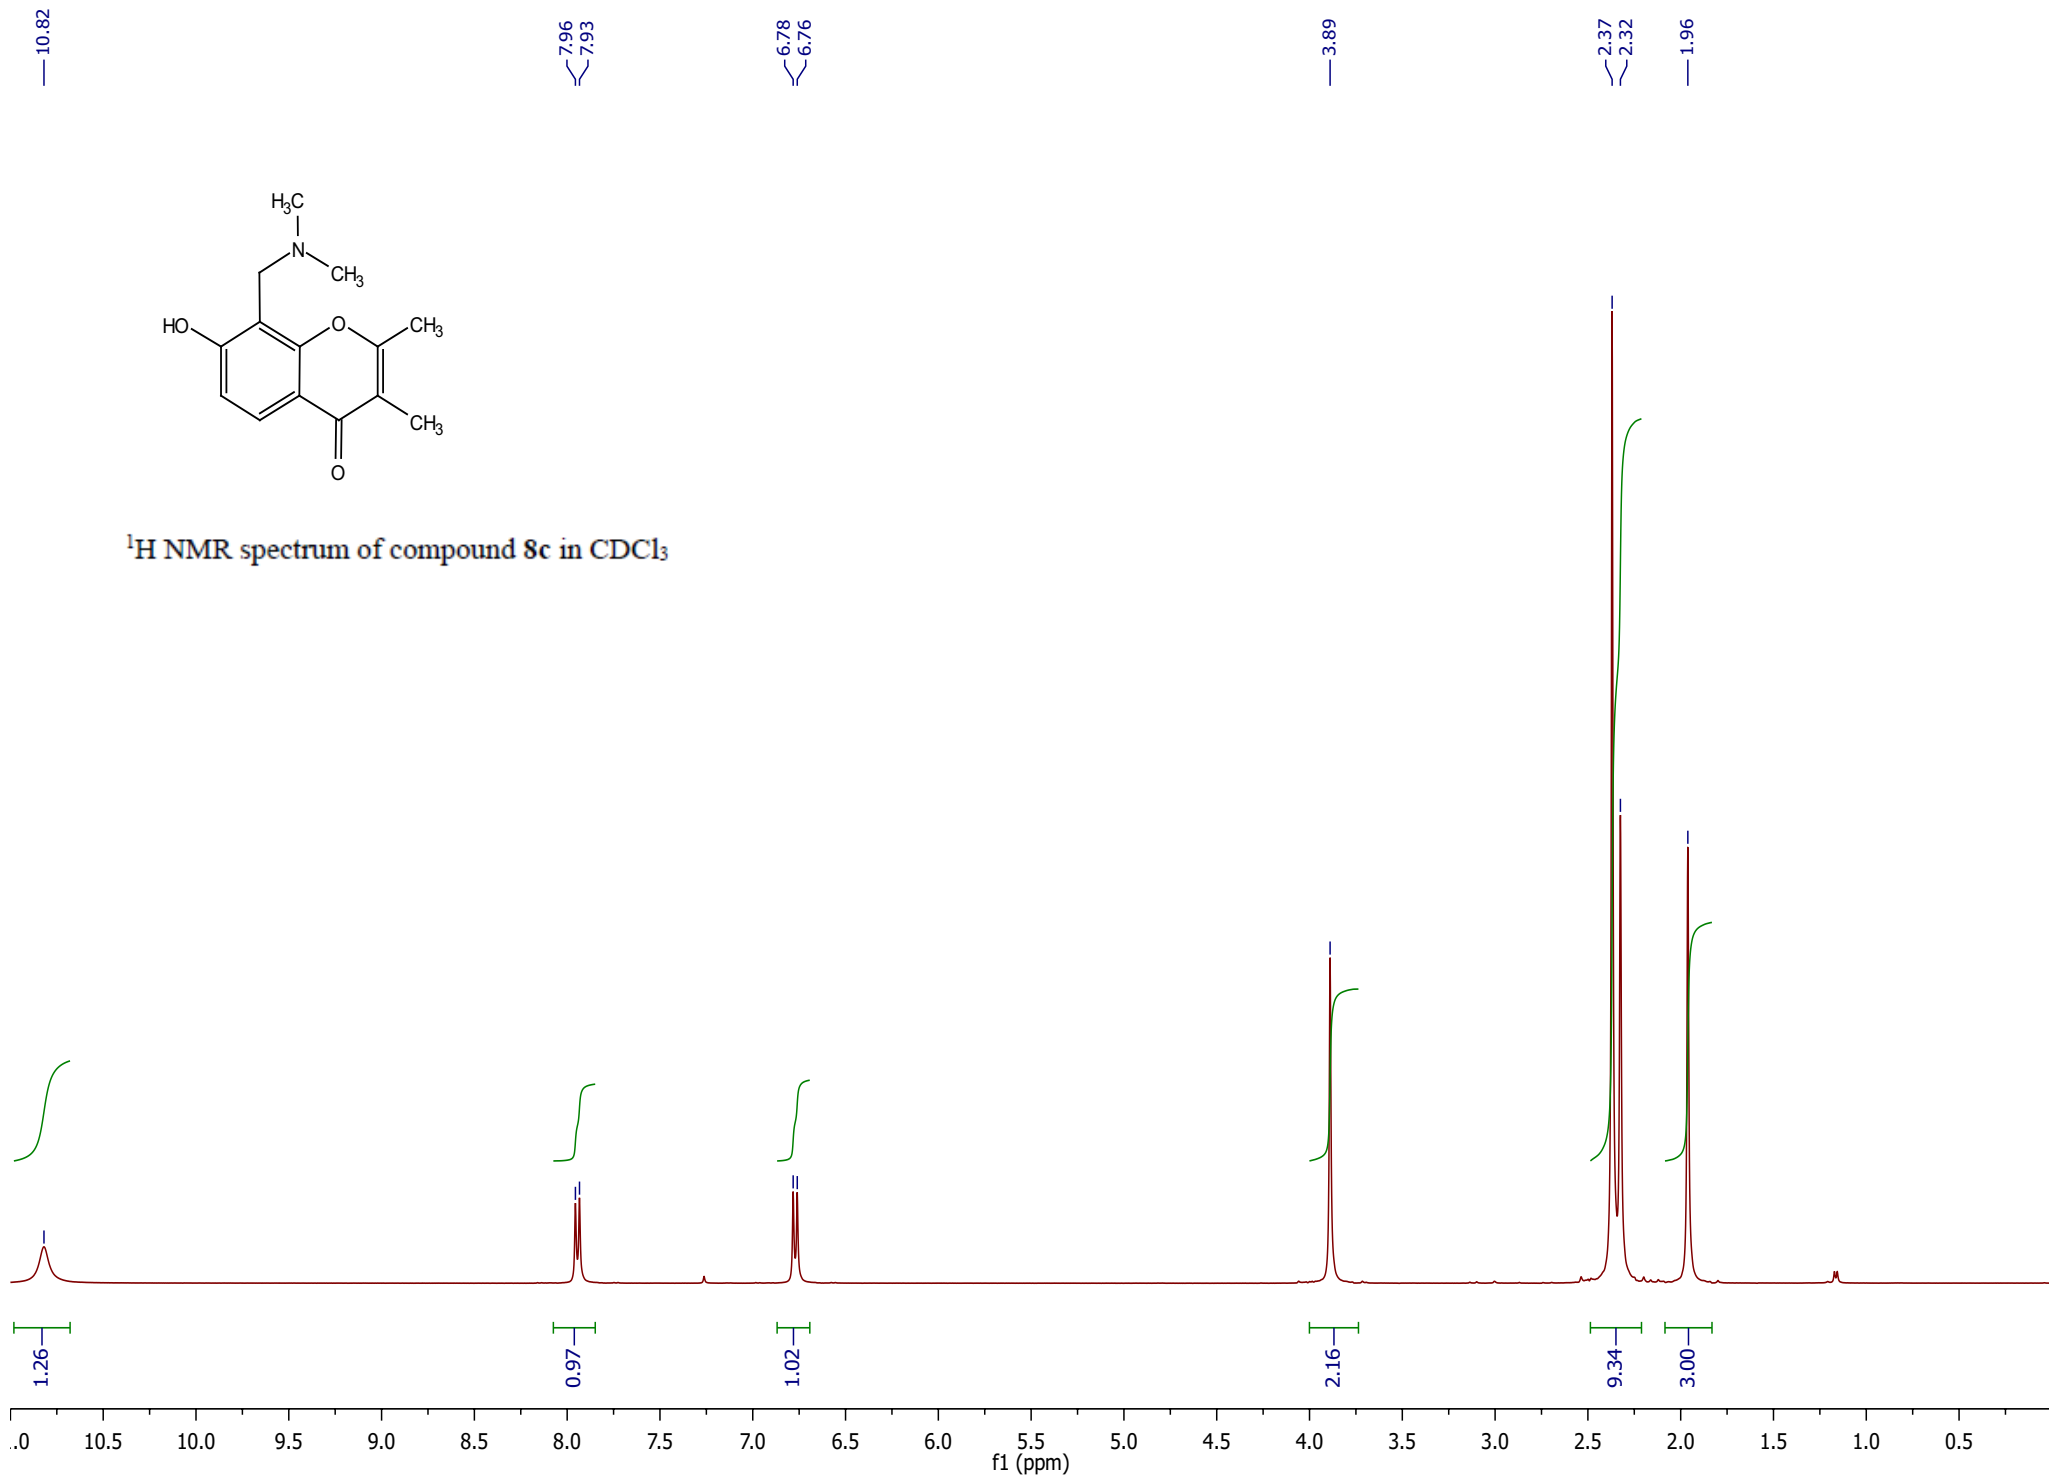



$^{13}\text{C}$  NMR spectrum of compound 8c in  $\text{CDCl}_3$

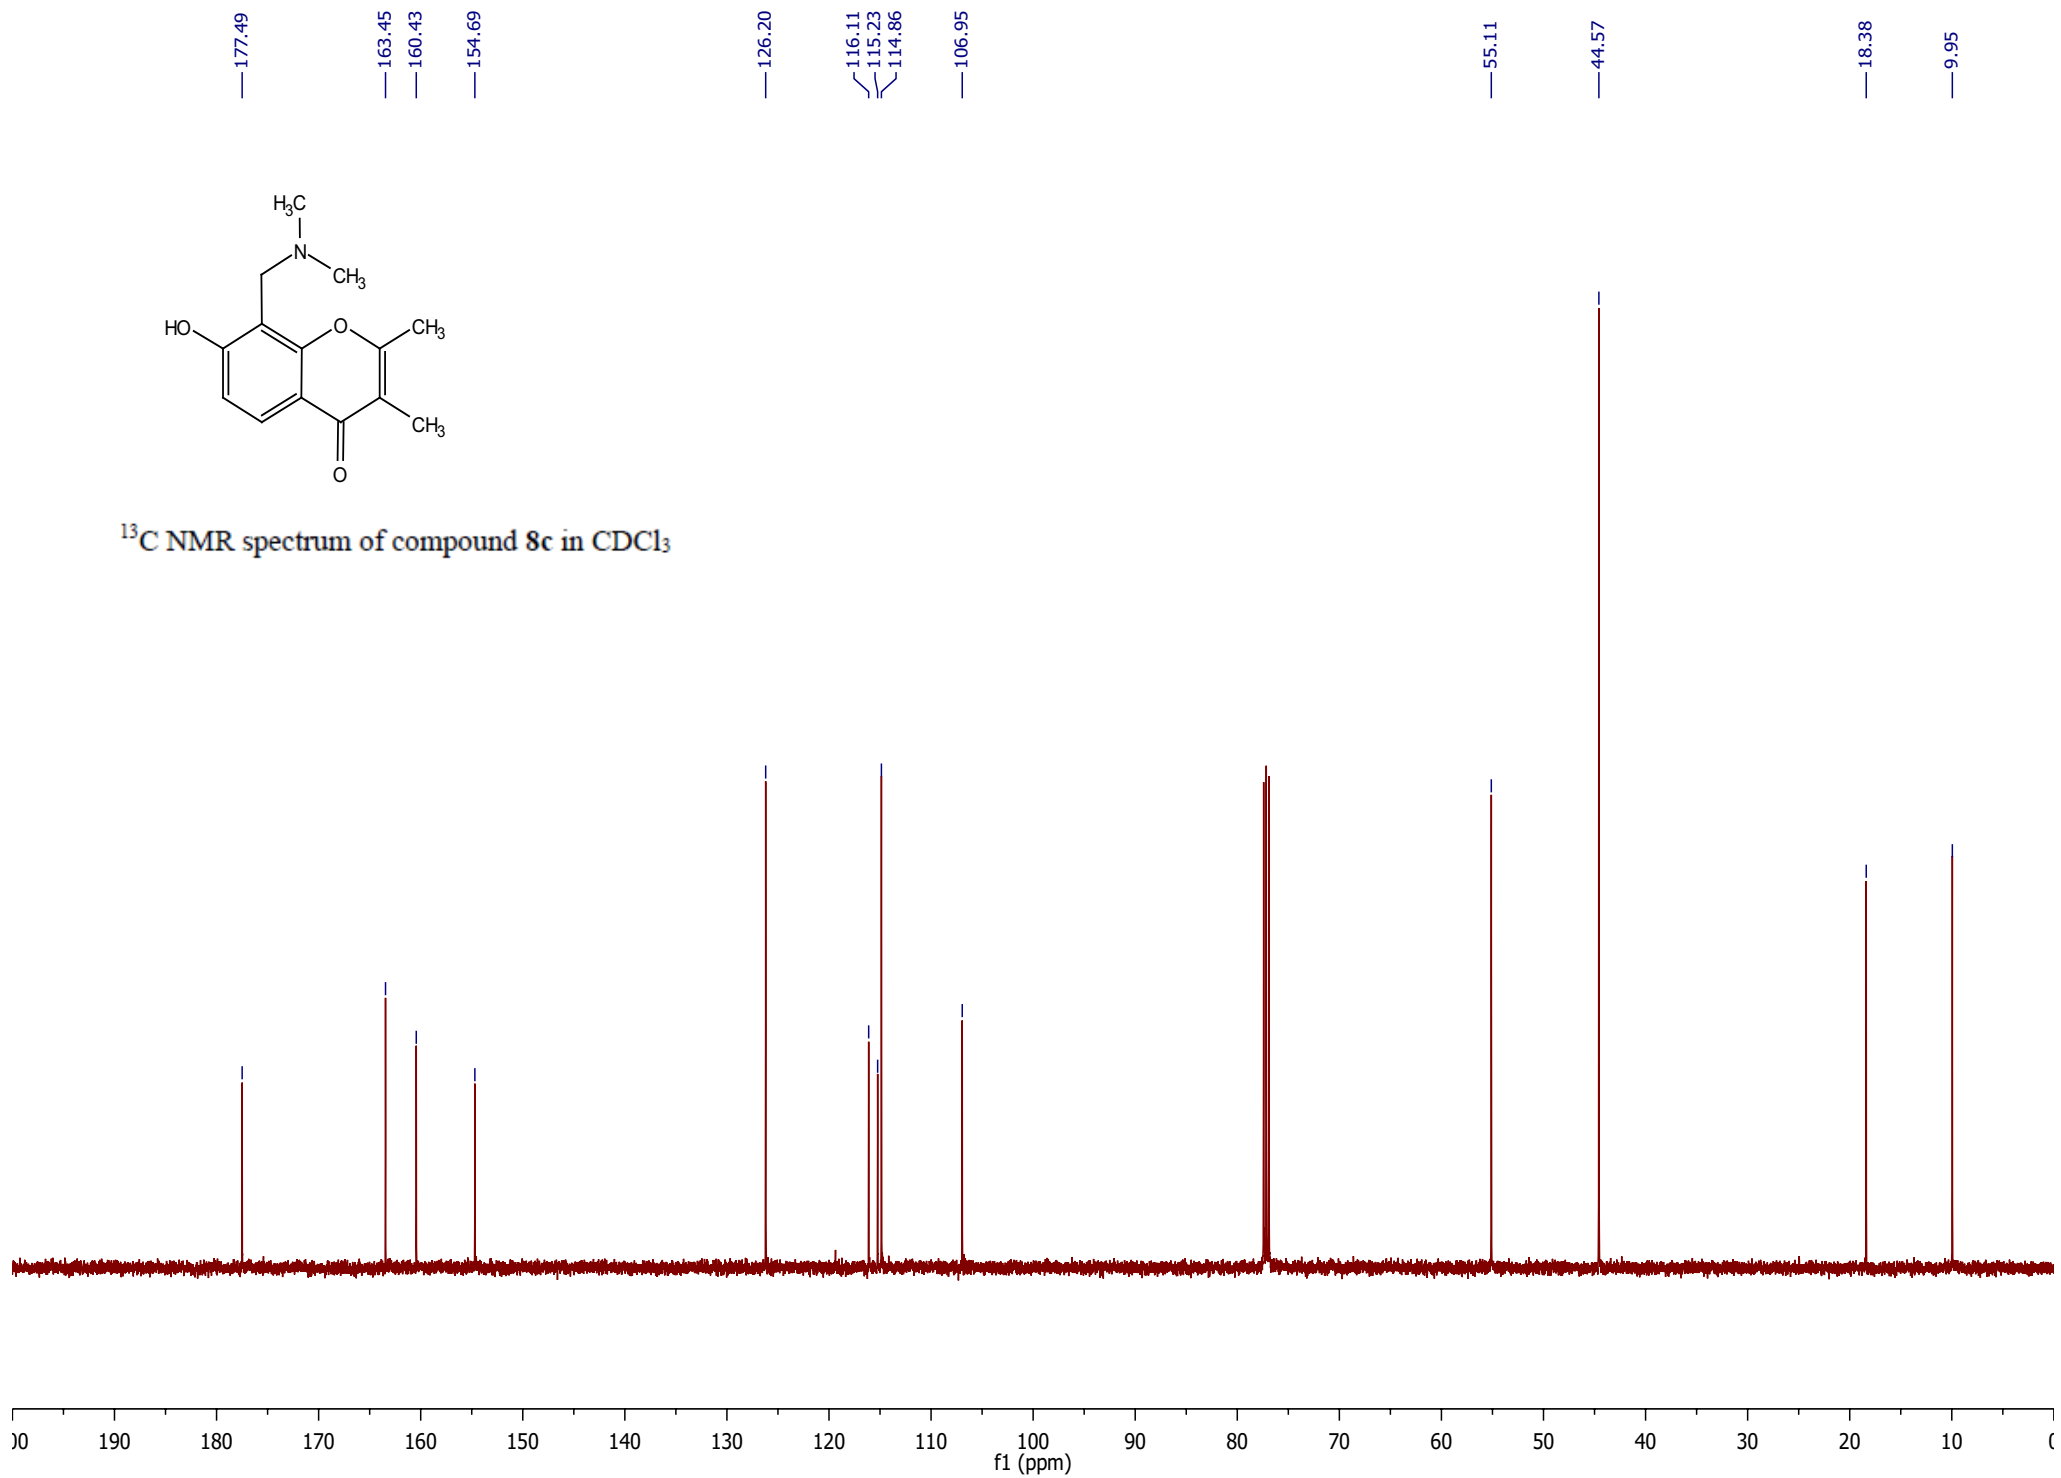

8.30  
7.91  
7.88  
7.39  
7.37  
6.87  
6.85  
6.81  
6.79  
3.93  
2.34

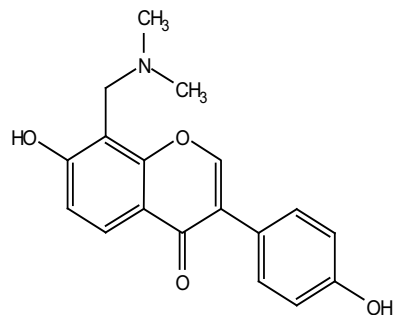

<sup>1</sup>H NMR spectrum of compound **8d** in DMSO-*d*<sub>6</sub>

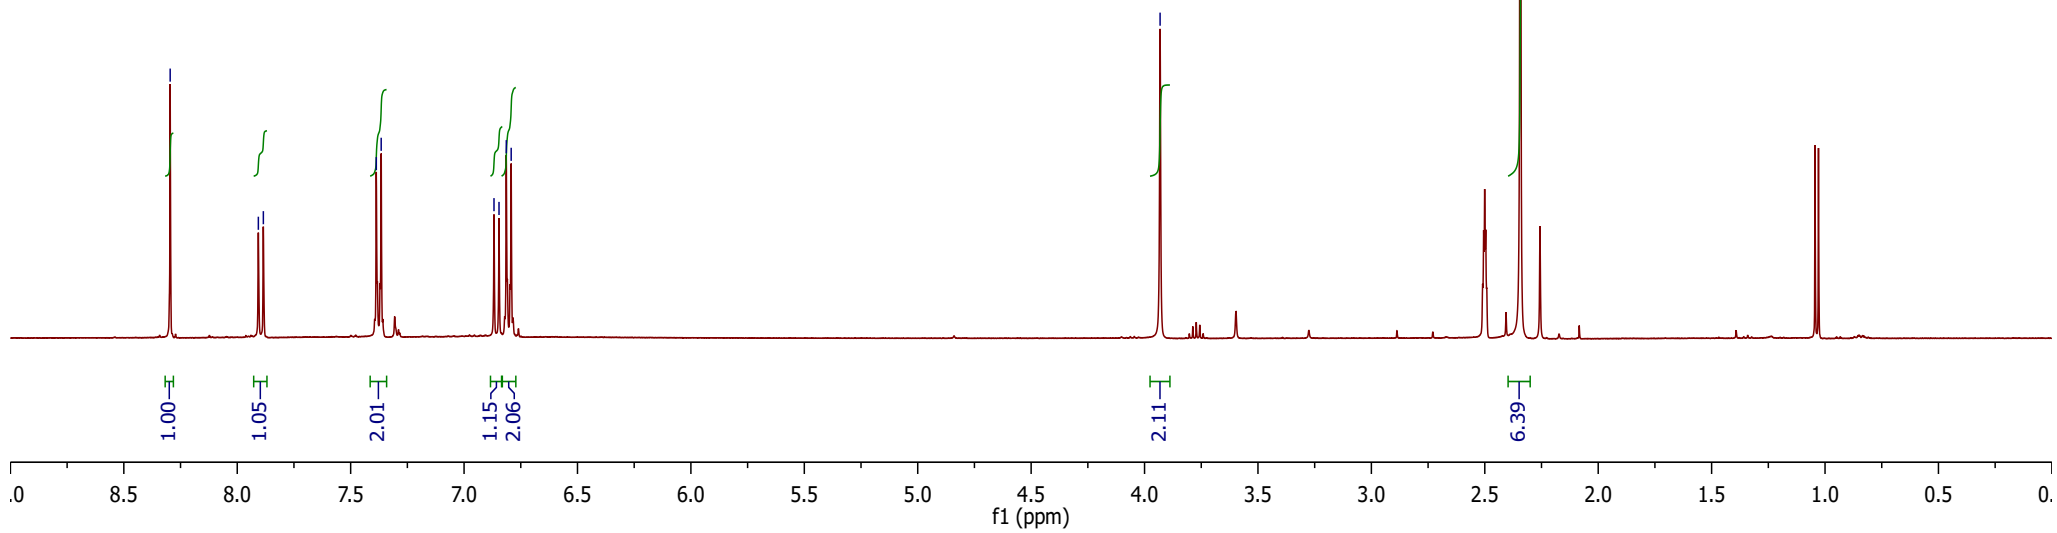

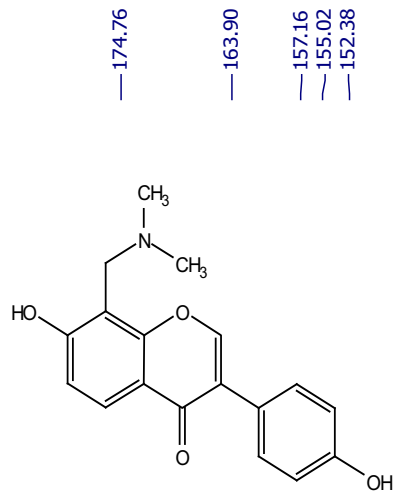

$^{13}\text{C}$  NMR spectrum of compound 8d in  $\text{DMSO-}d_6$

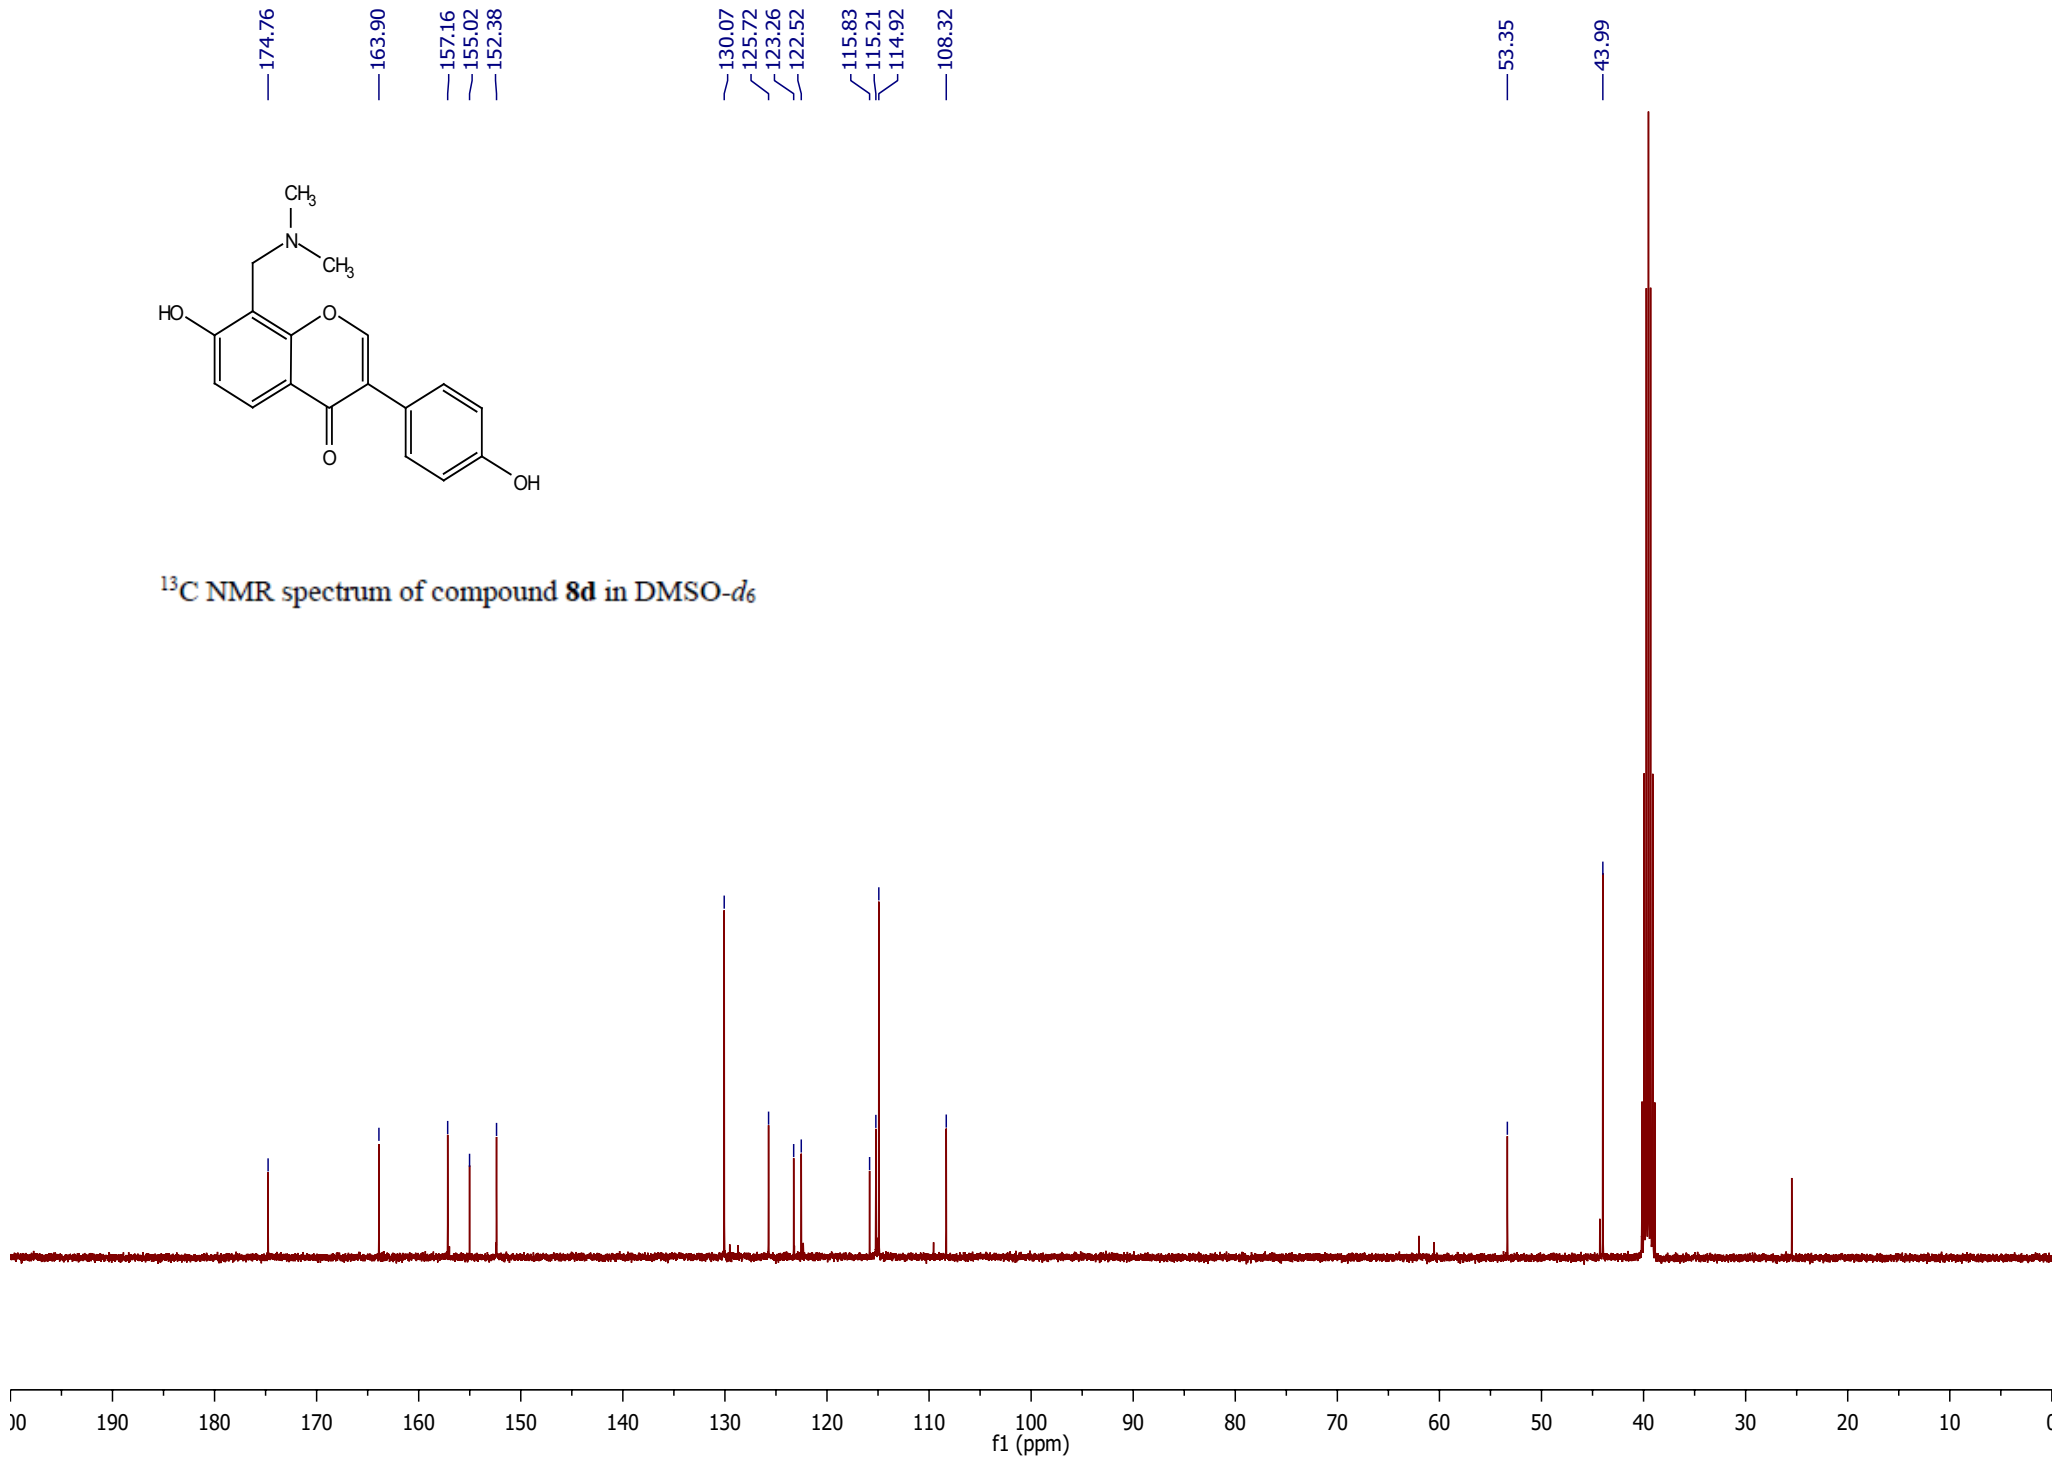

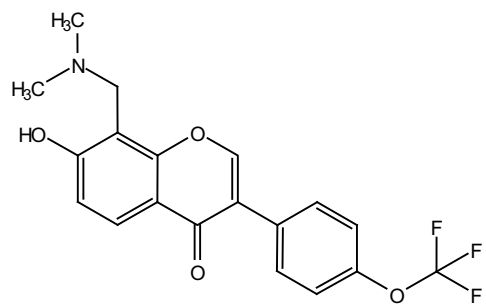

$^1\text{H}$  NMR spectrum of compound **8j** in  $\text{CDCl}_3$

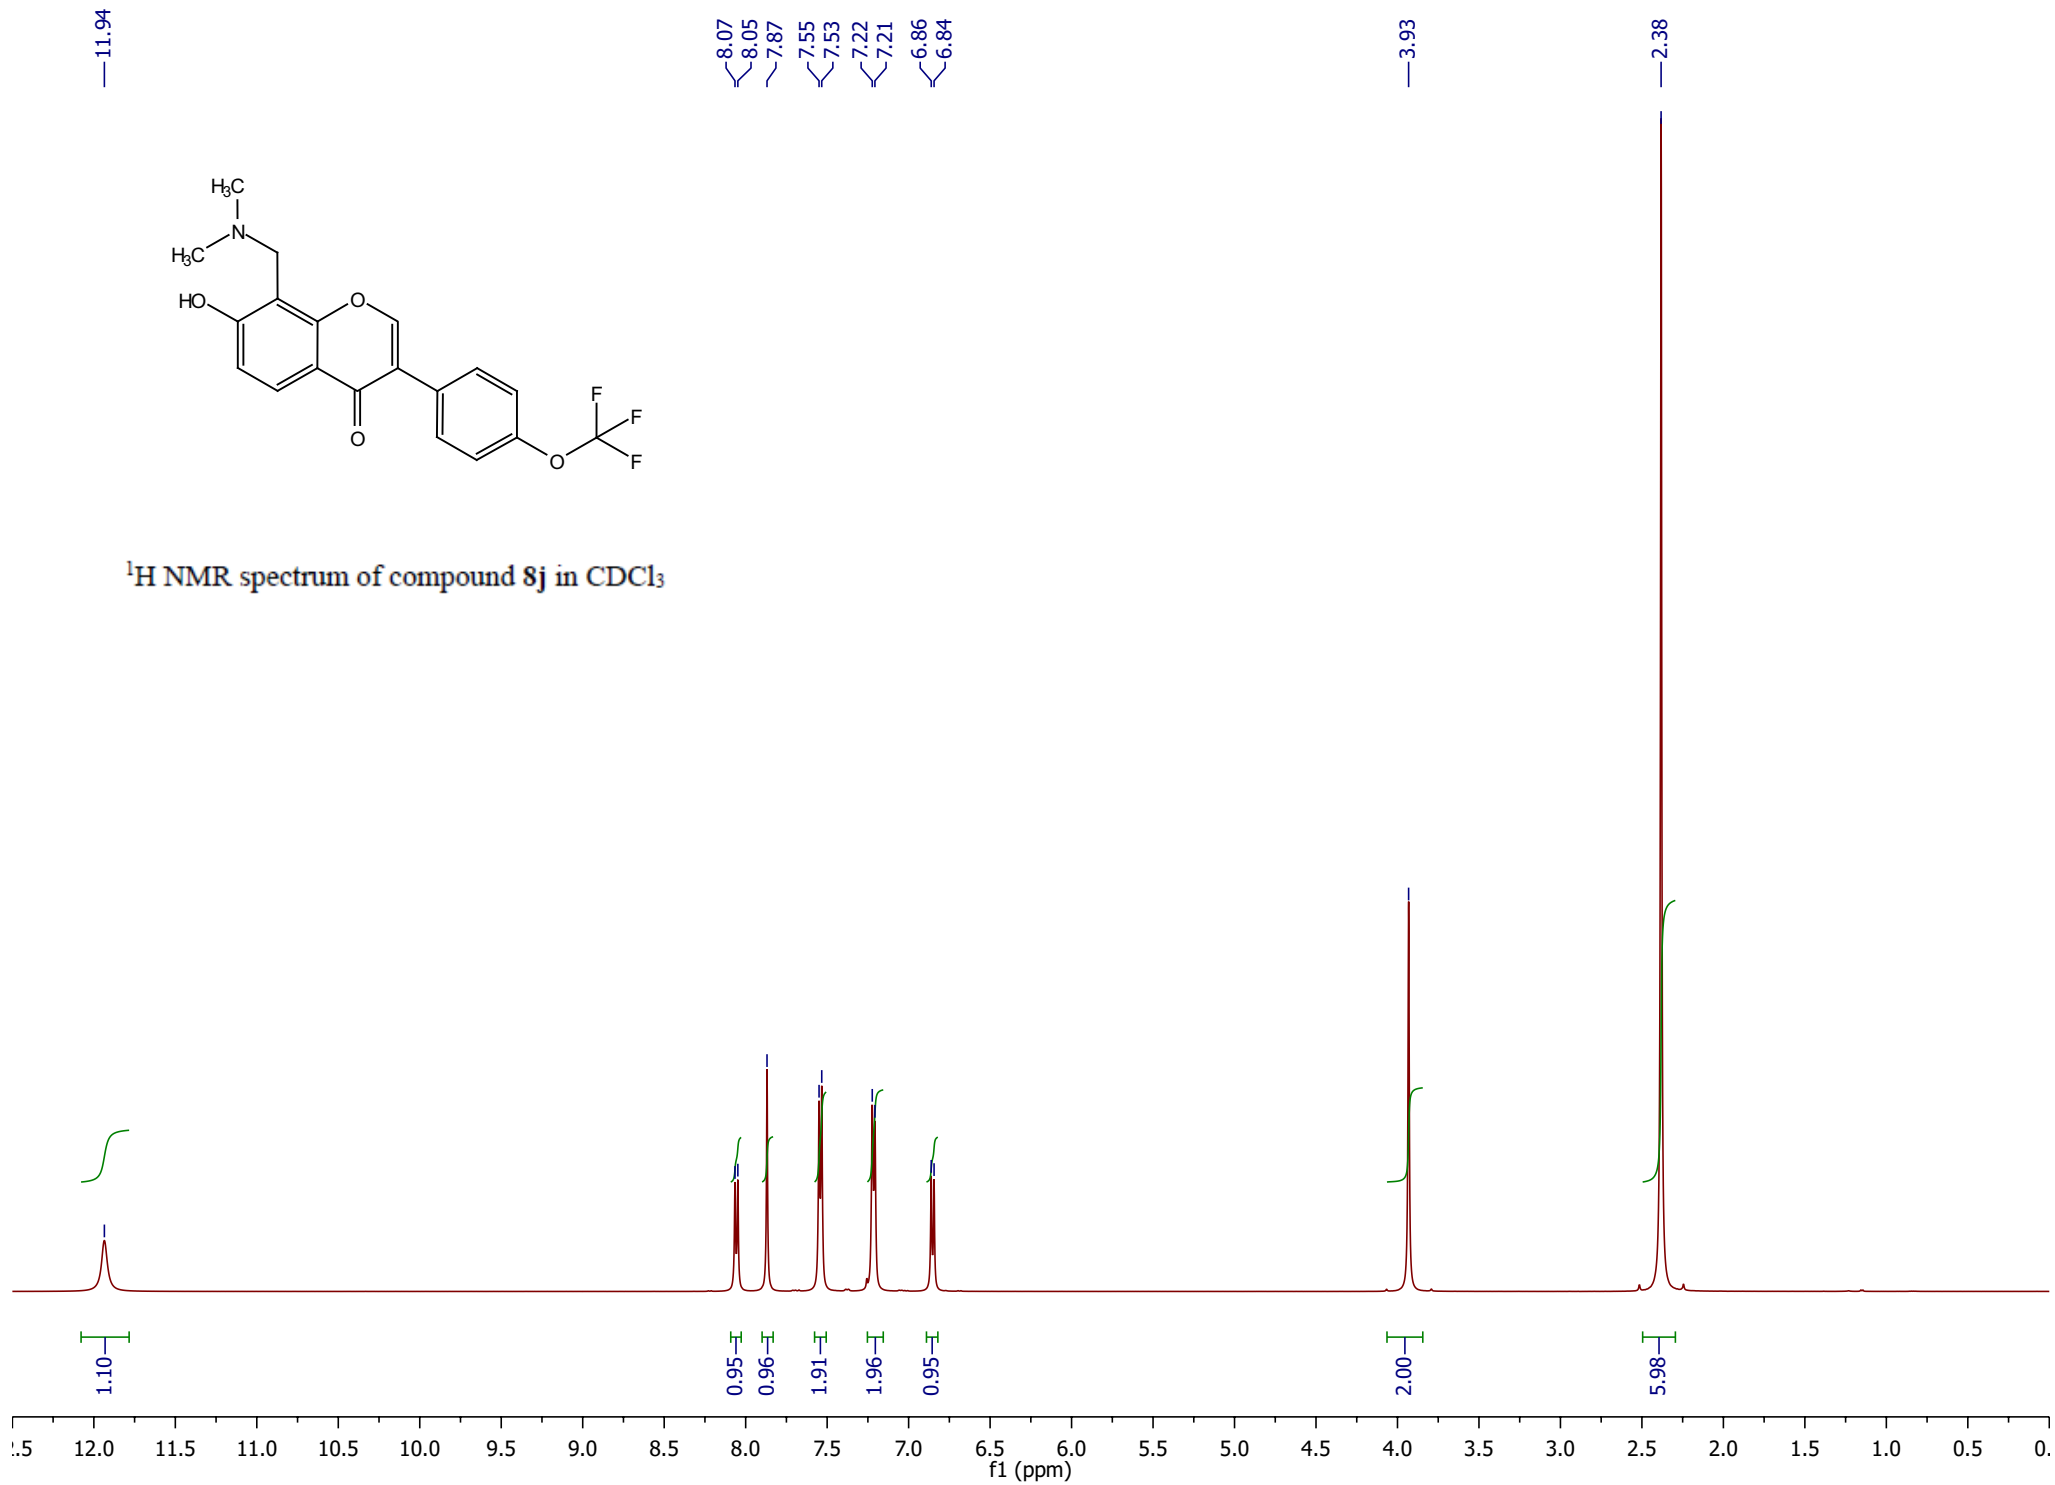

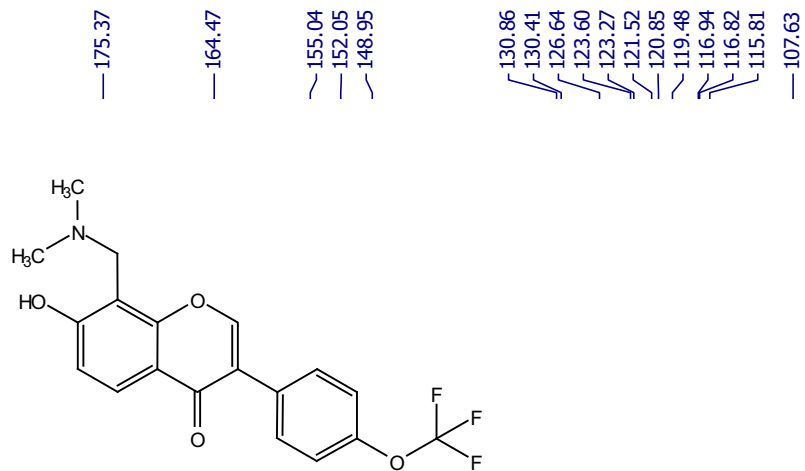

$^{13}\text{C}$  NMR spectrum of compound **8c** in  $\text{CDCl}_3$

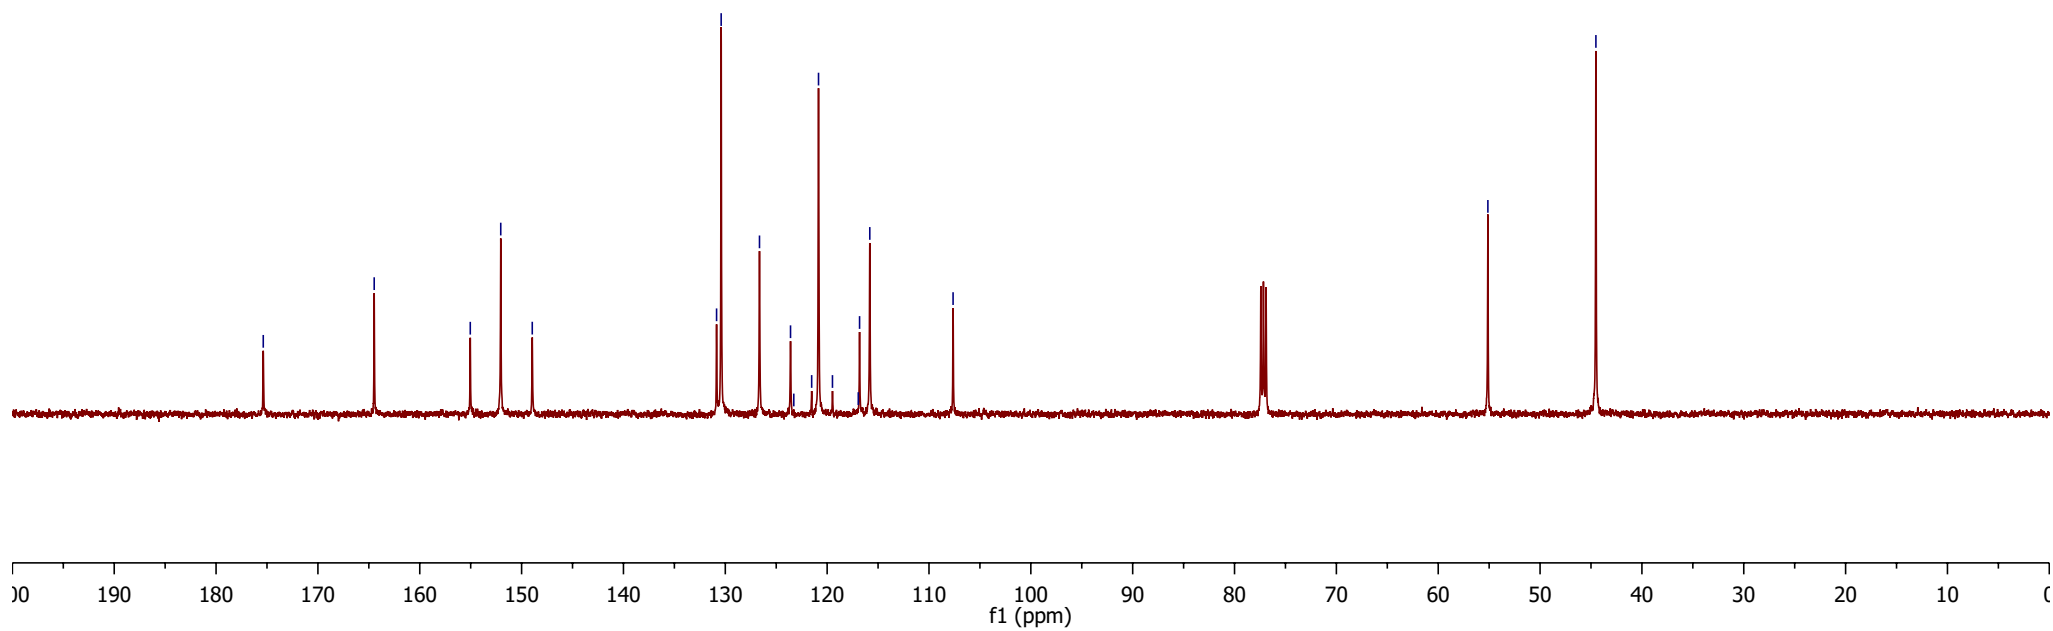

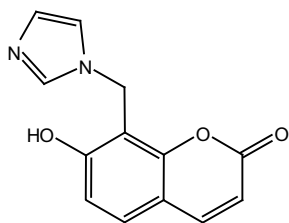

$^1\text{H}$  NMR spectrum of compound **9a** in  $\text{DMSO-}d_6$

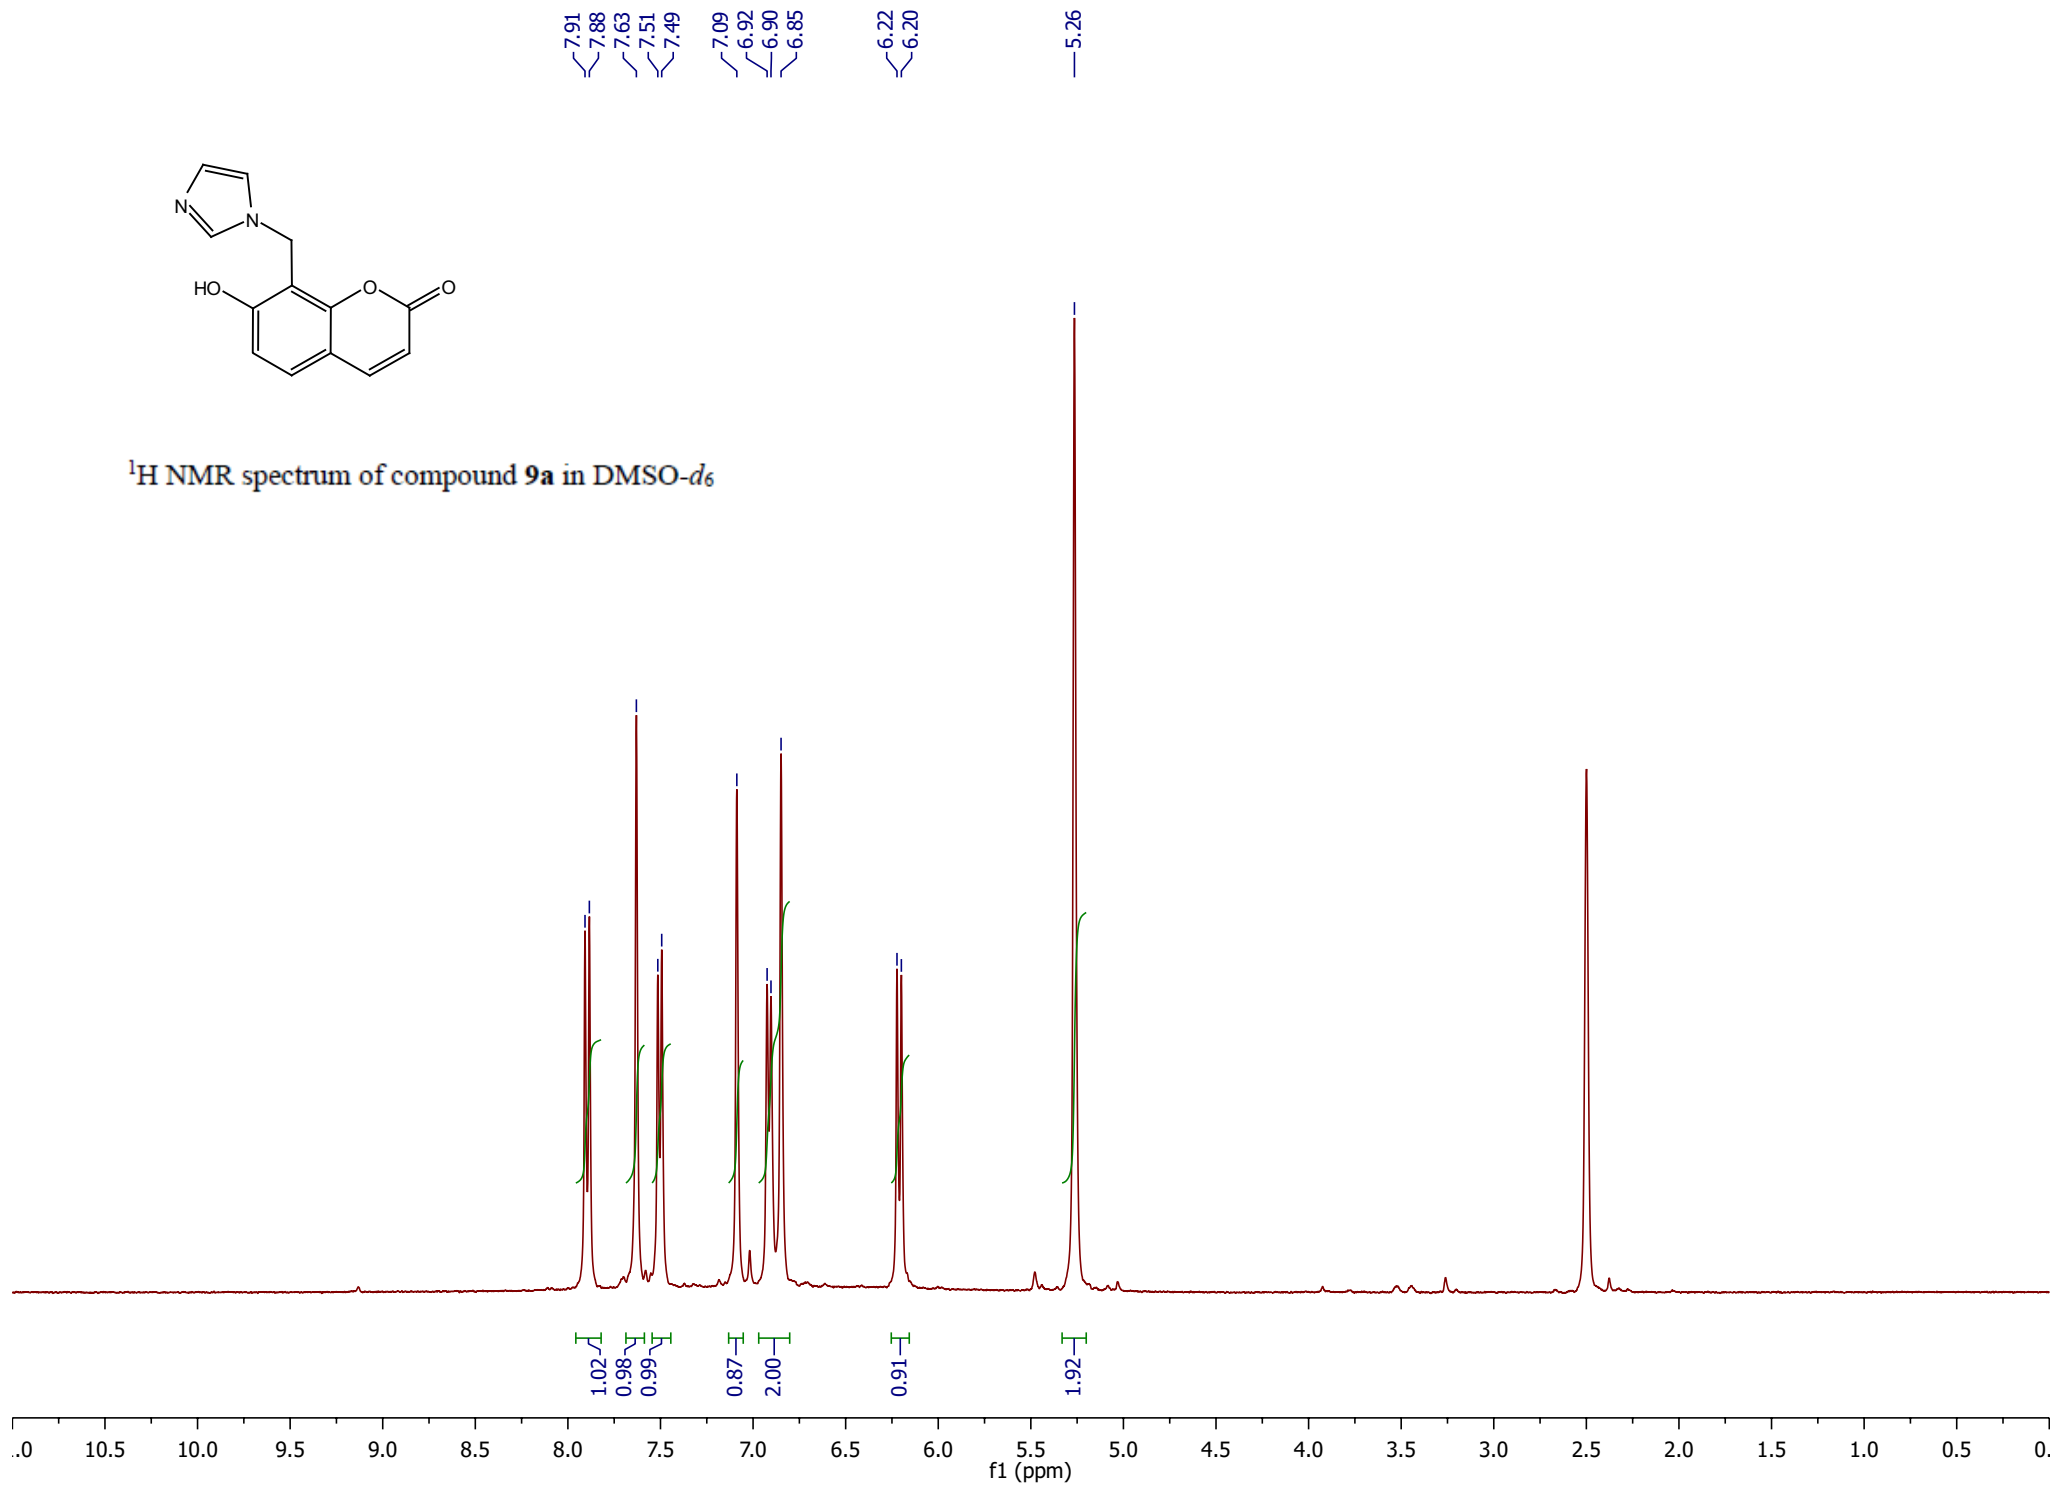

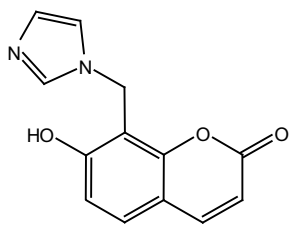

$^{13}\text{C}$  NMR spectrum of compound 9a in  $\text{DMSO-}d_6$

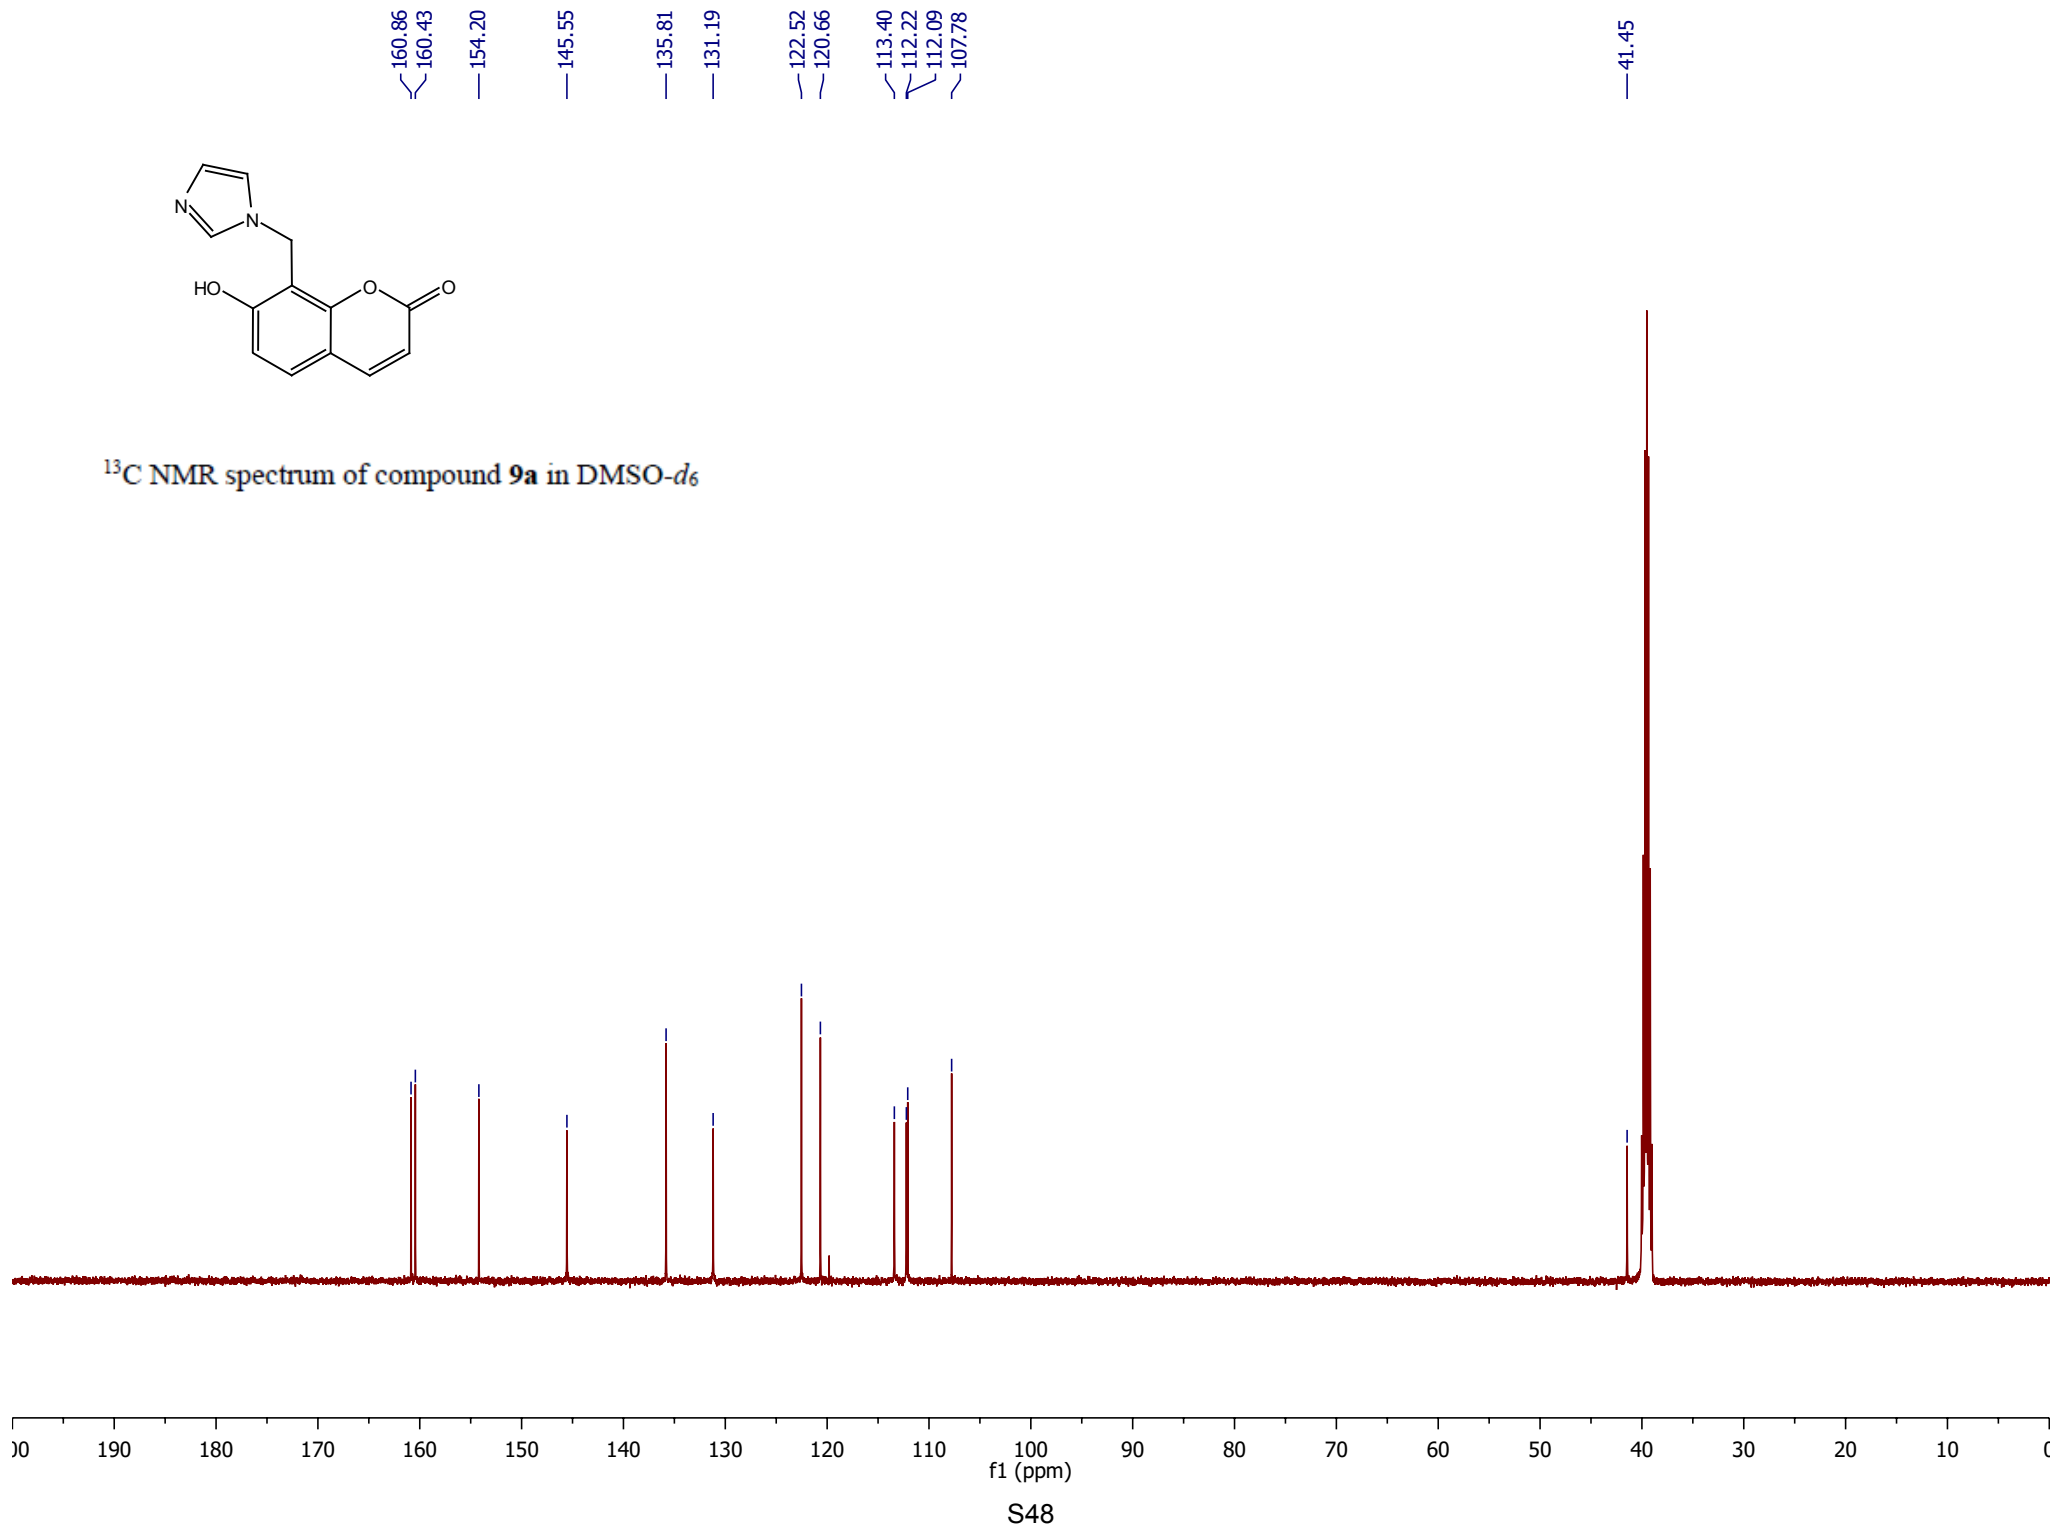



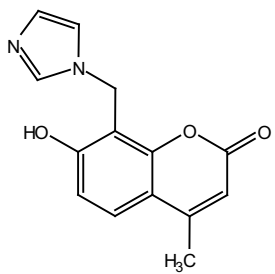

<sup>1</sup>H NMR spectrum of compound 9b in DMSO-d<sub>6</sub>

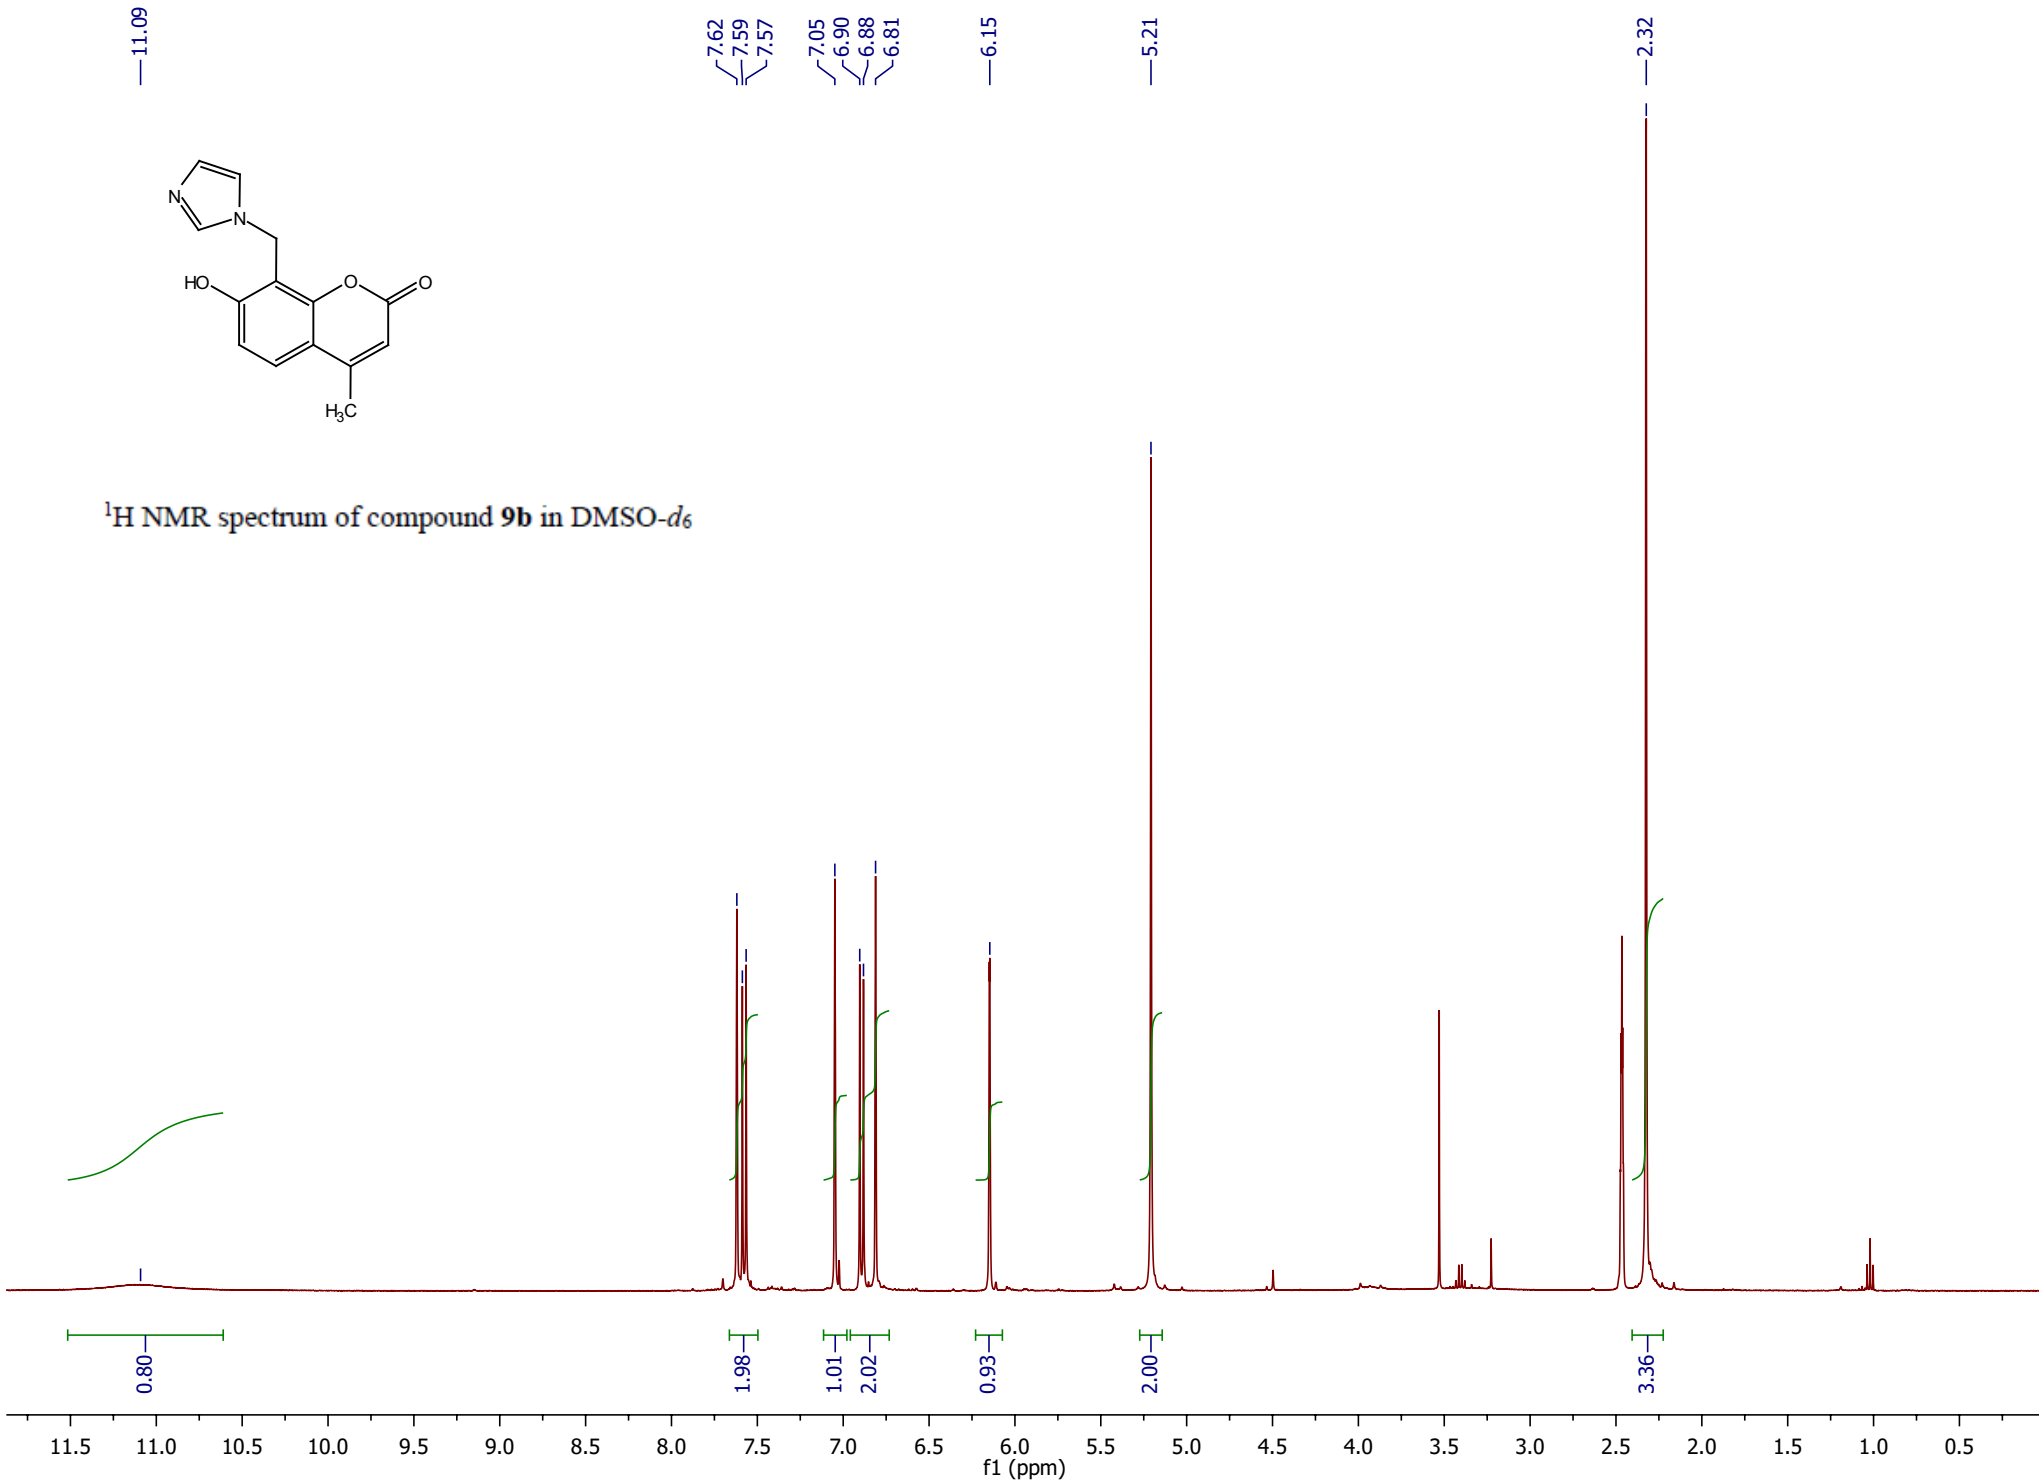

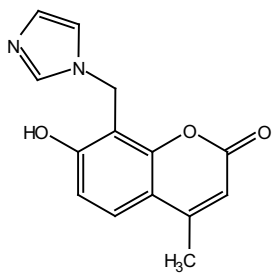

$^{13}\text{C}$  NMR spectrum of compound **9b** in  $\text{DMSO-}d_6$

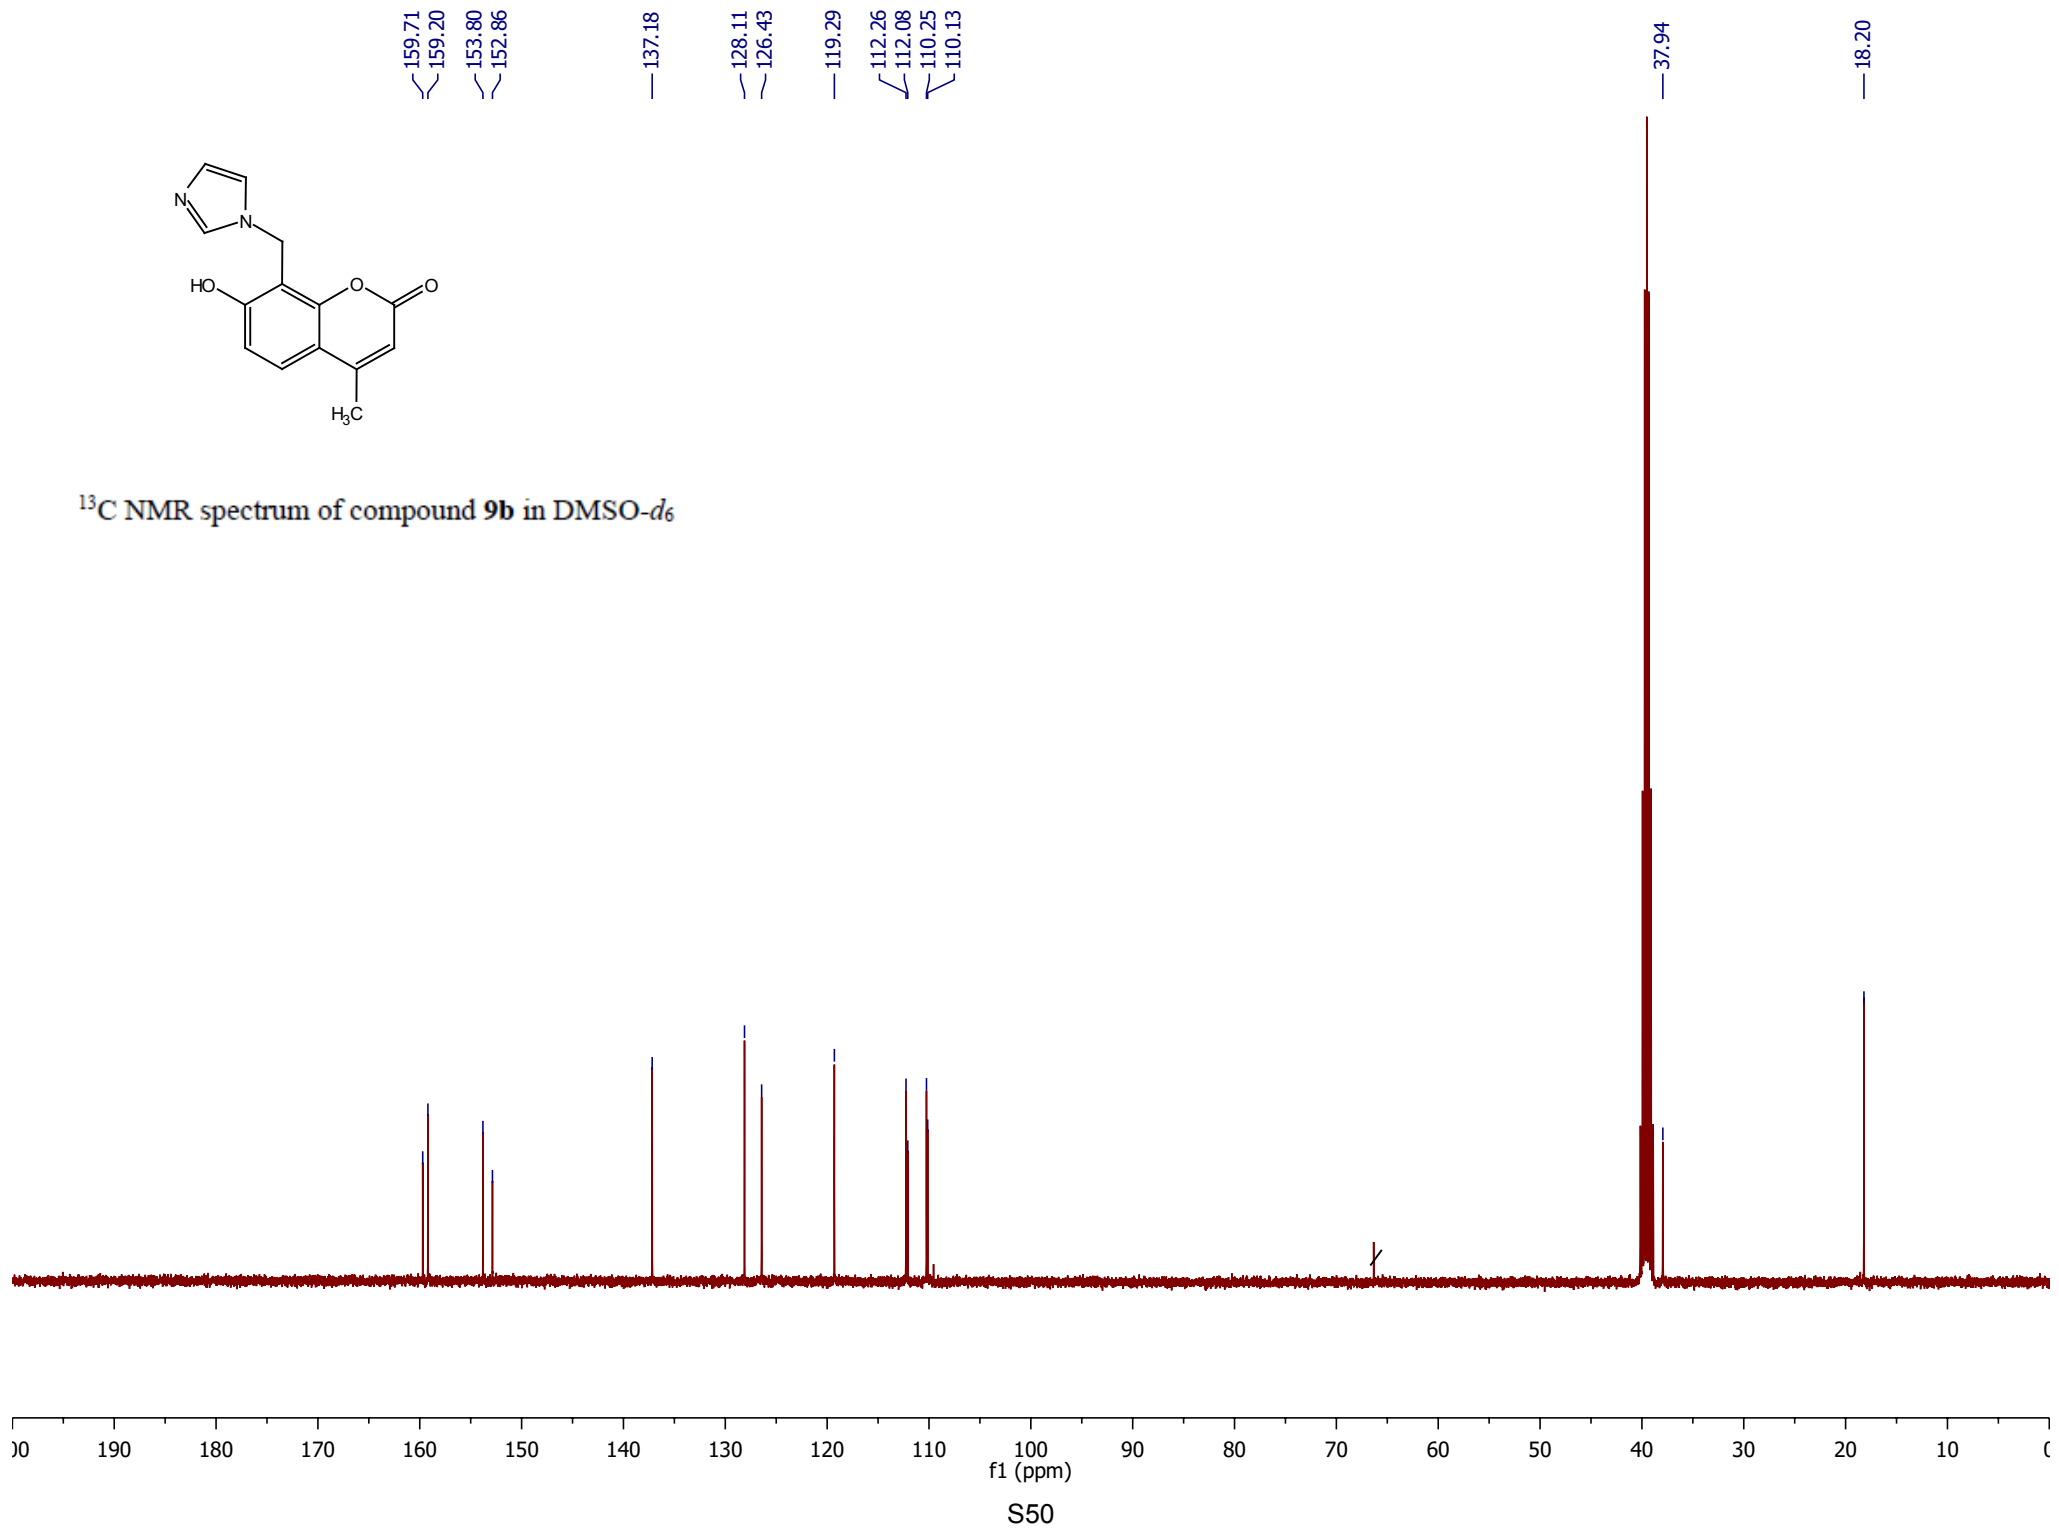

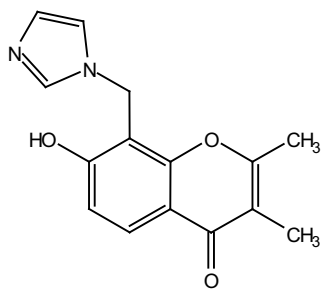

<sup>1</sup>H NMR spectrum of compound 9c in DMSO-d<sub>6</sub>

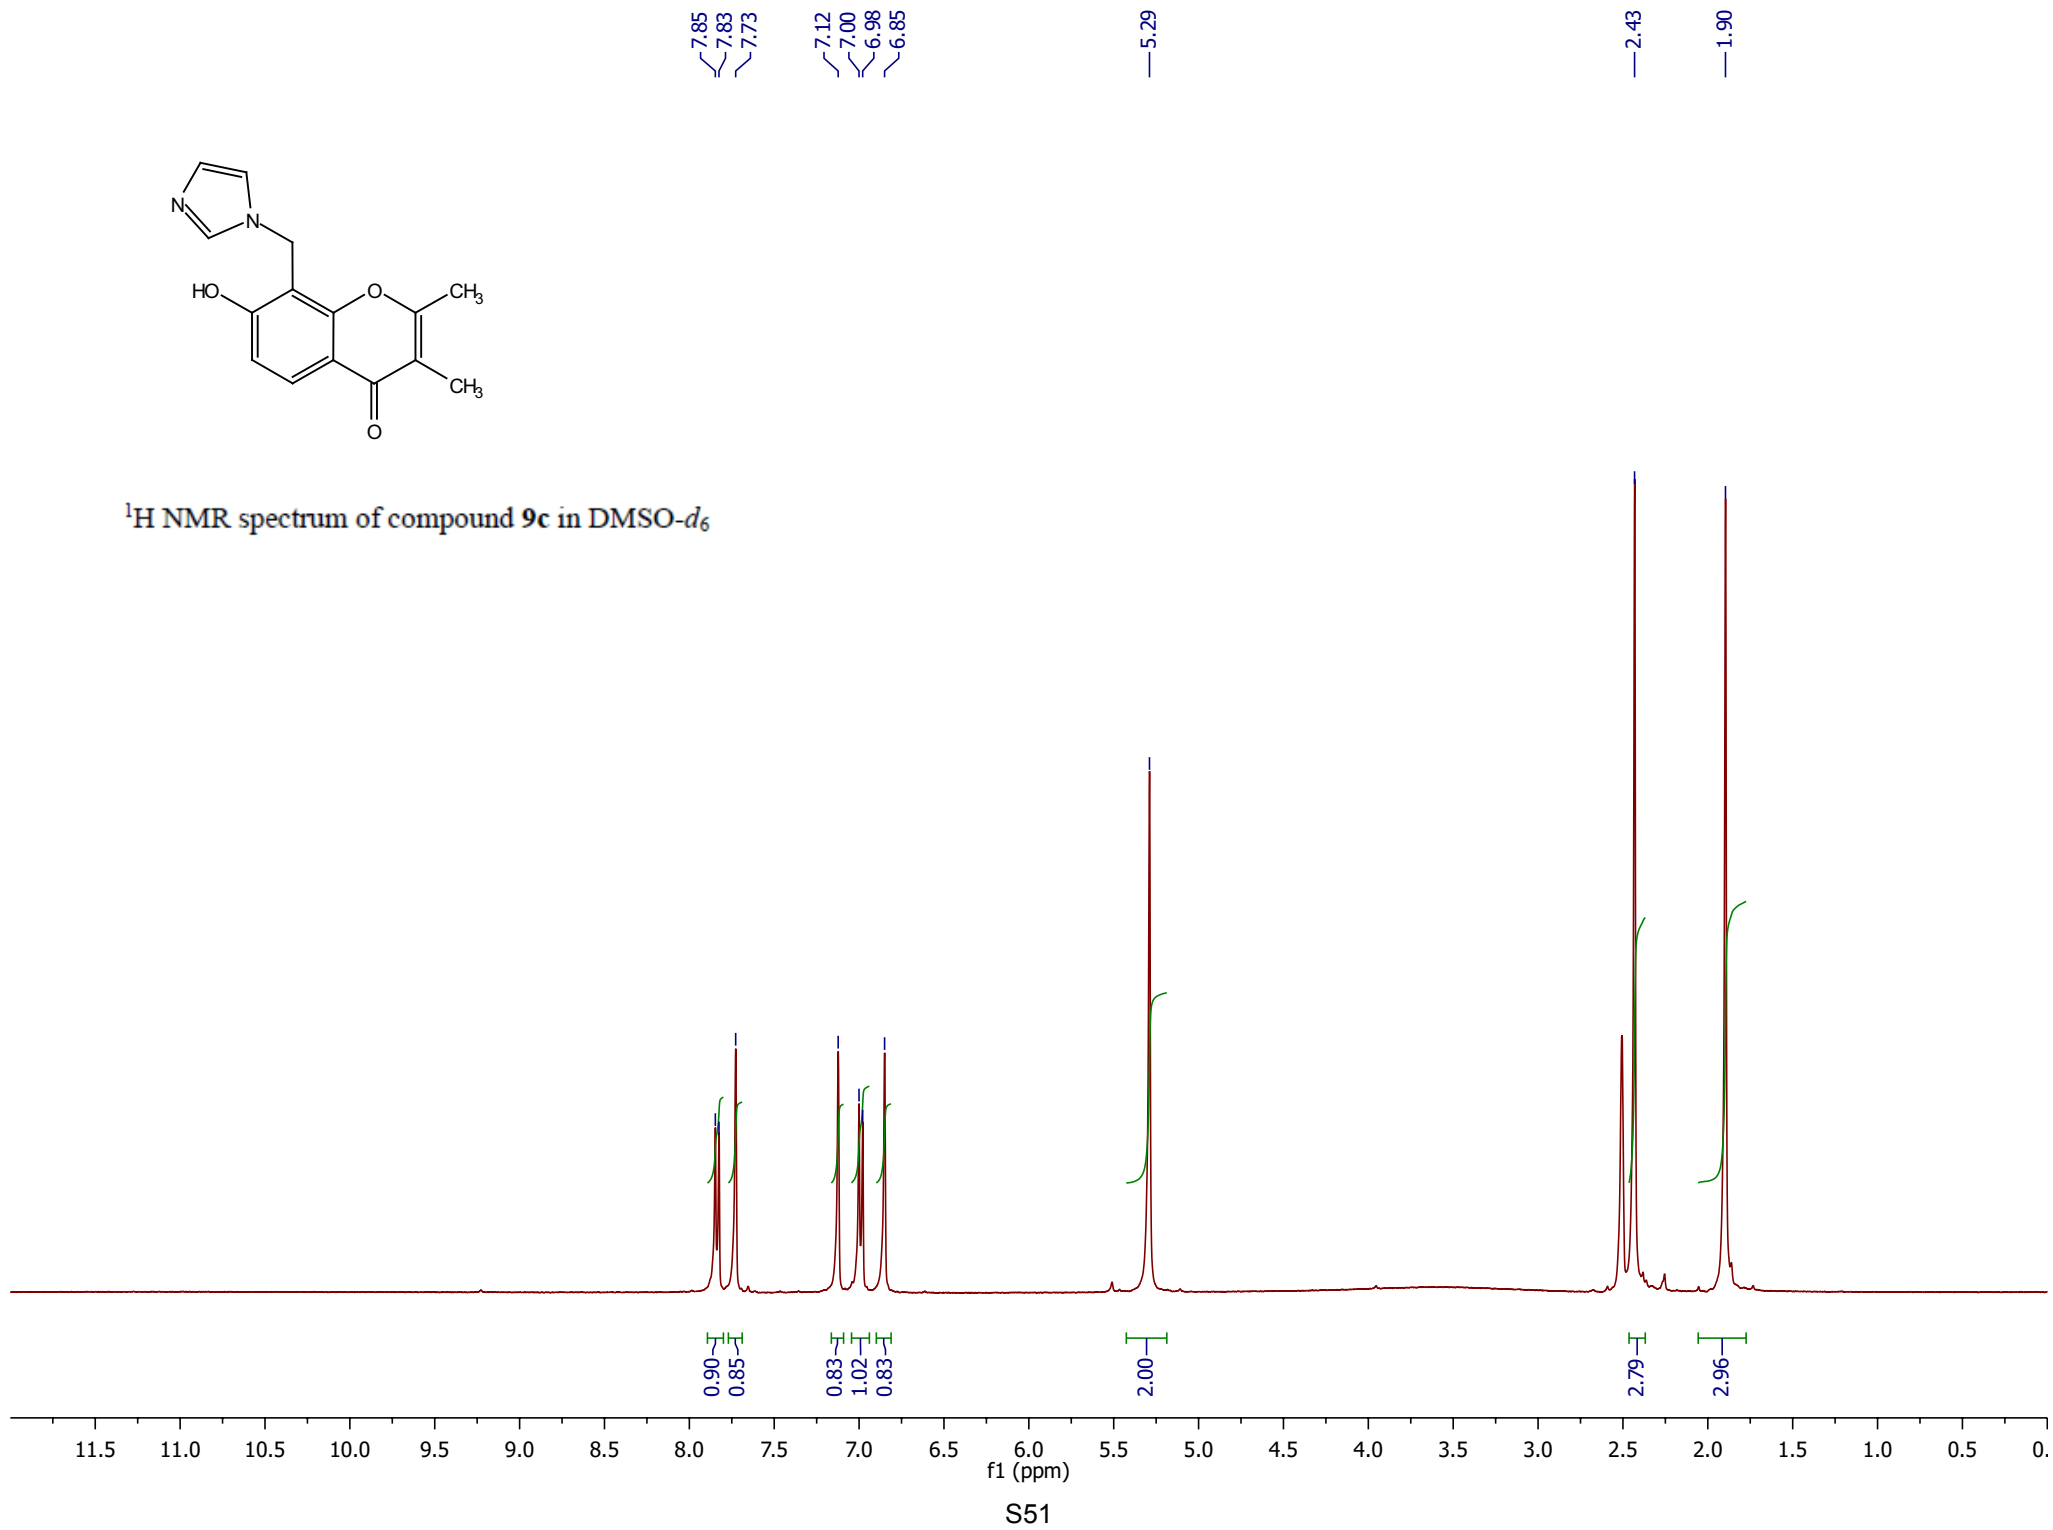

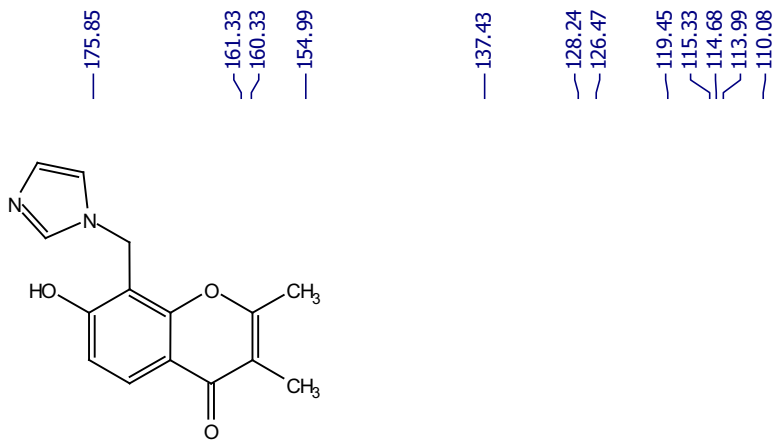

<sup>13</sup>C NMR spectrum of compound **9c** in DMSO-*d*<sub>6</sub>

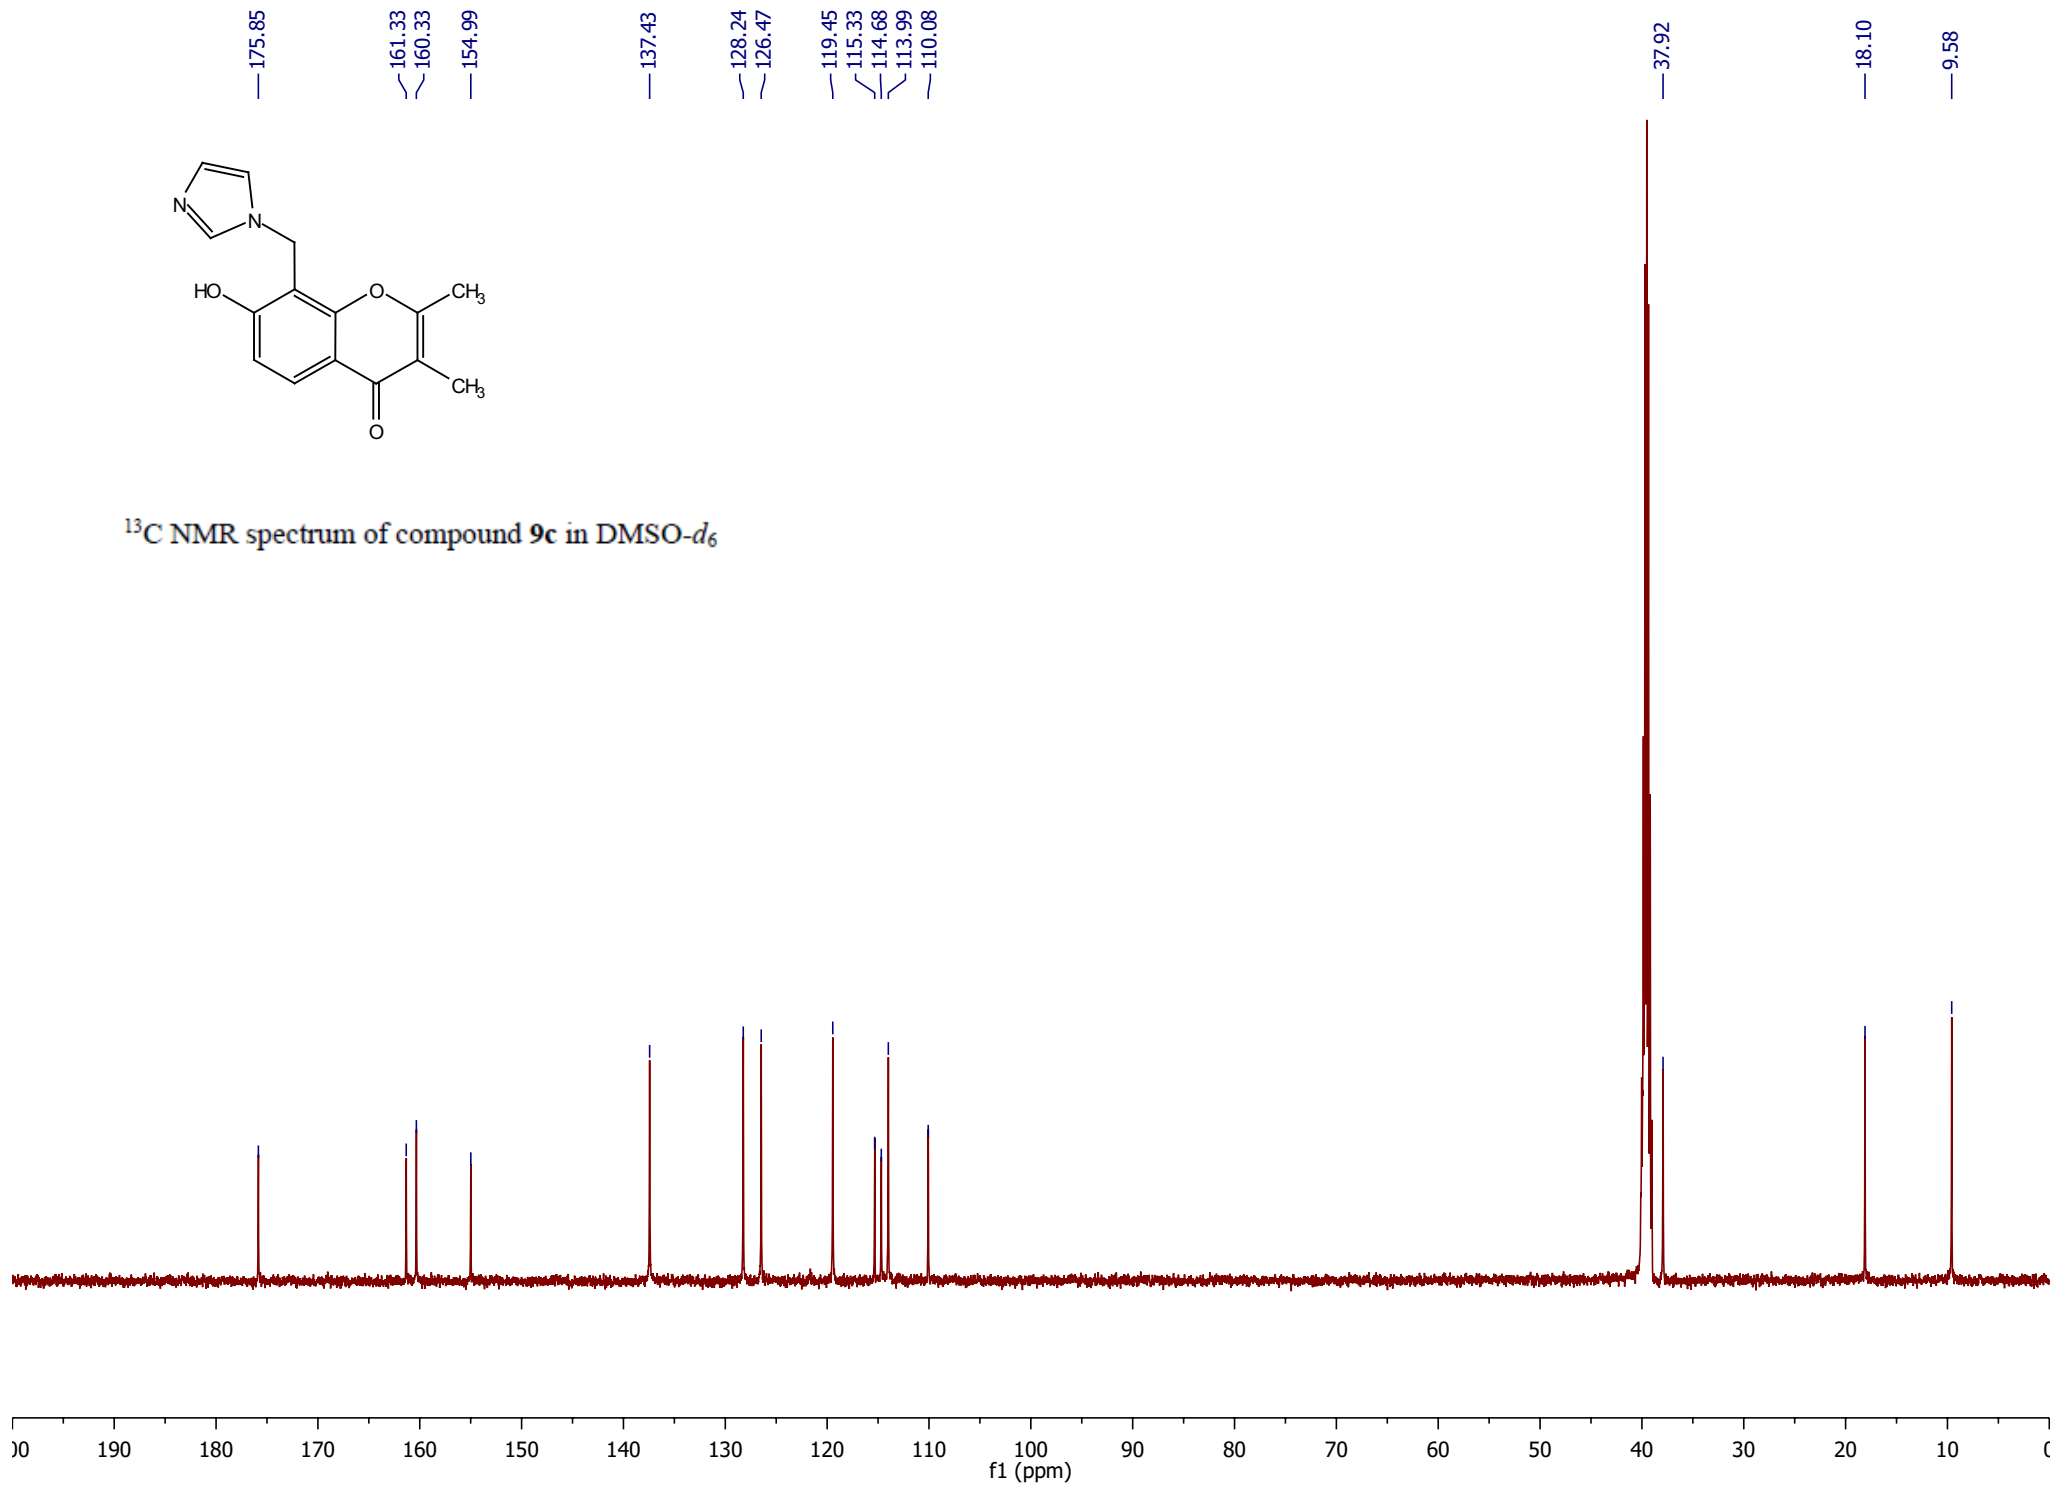

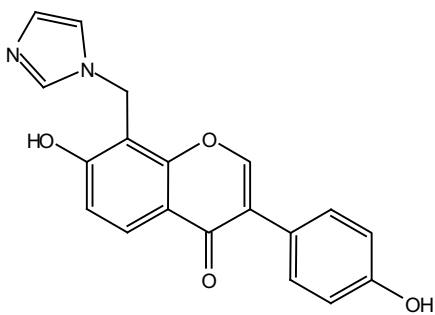

$^1\text{H}$  NMR spectrum of compound **9d** in  $\text{DMSO-}d_6$

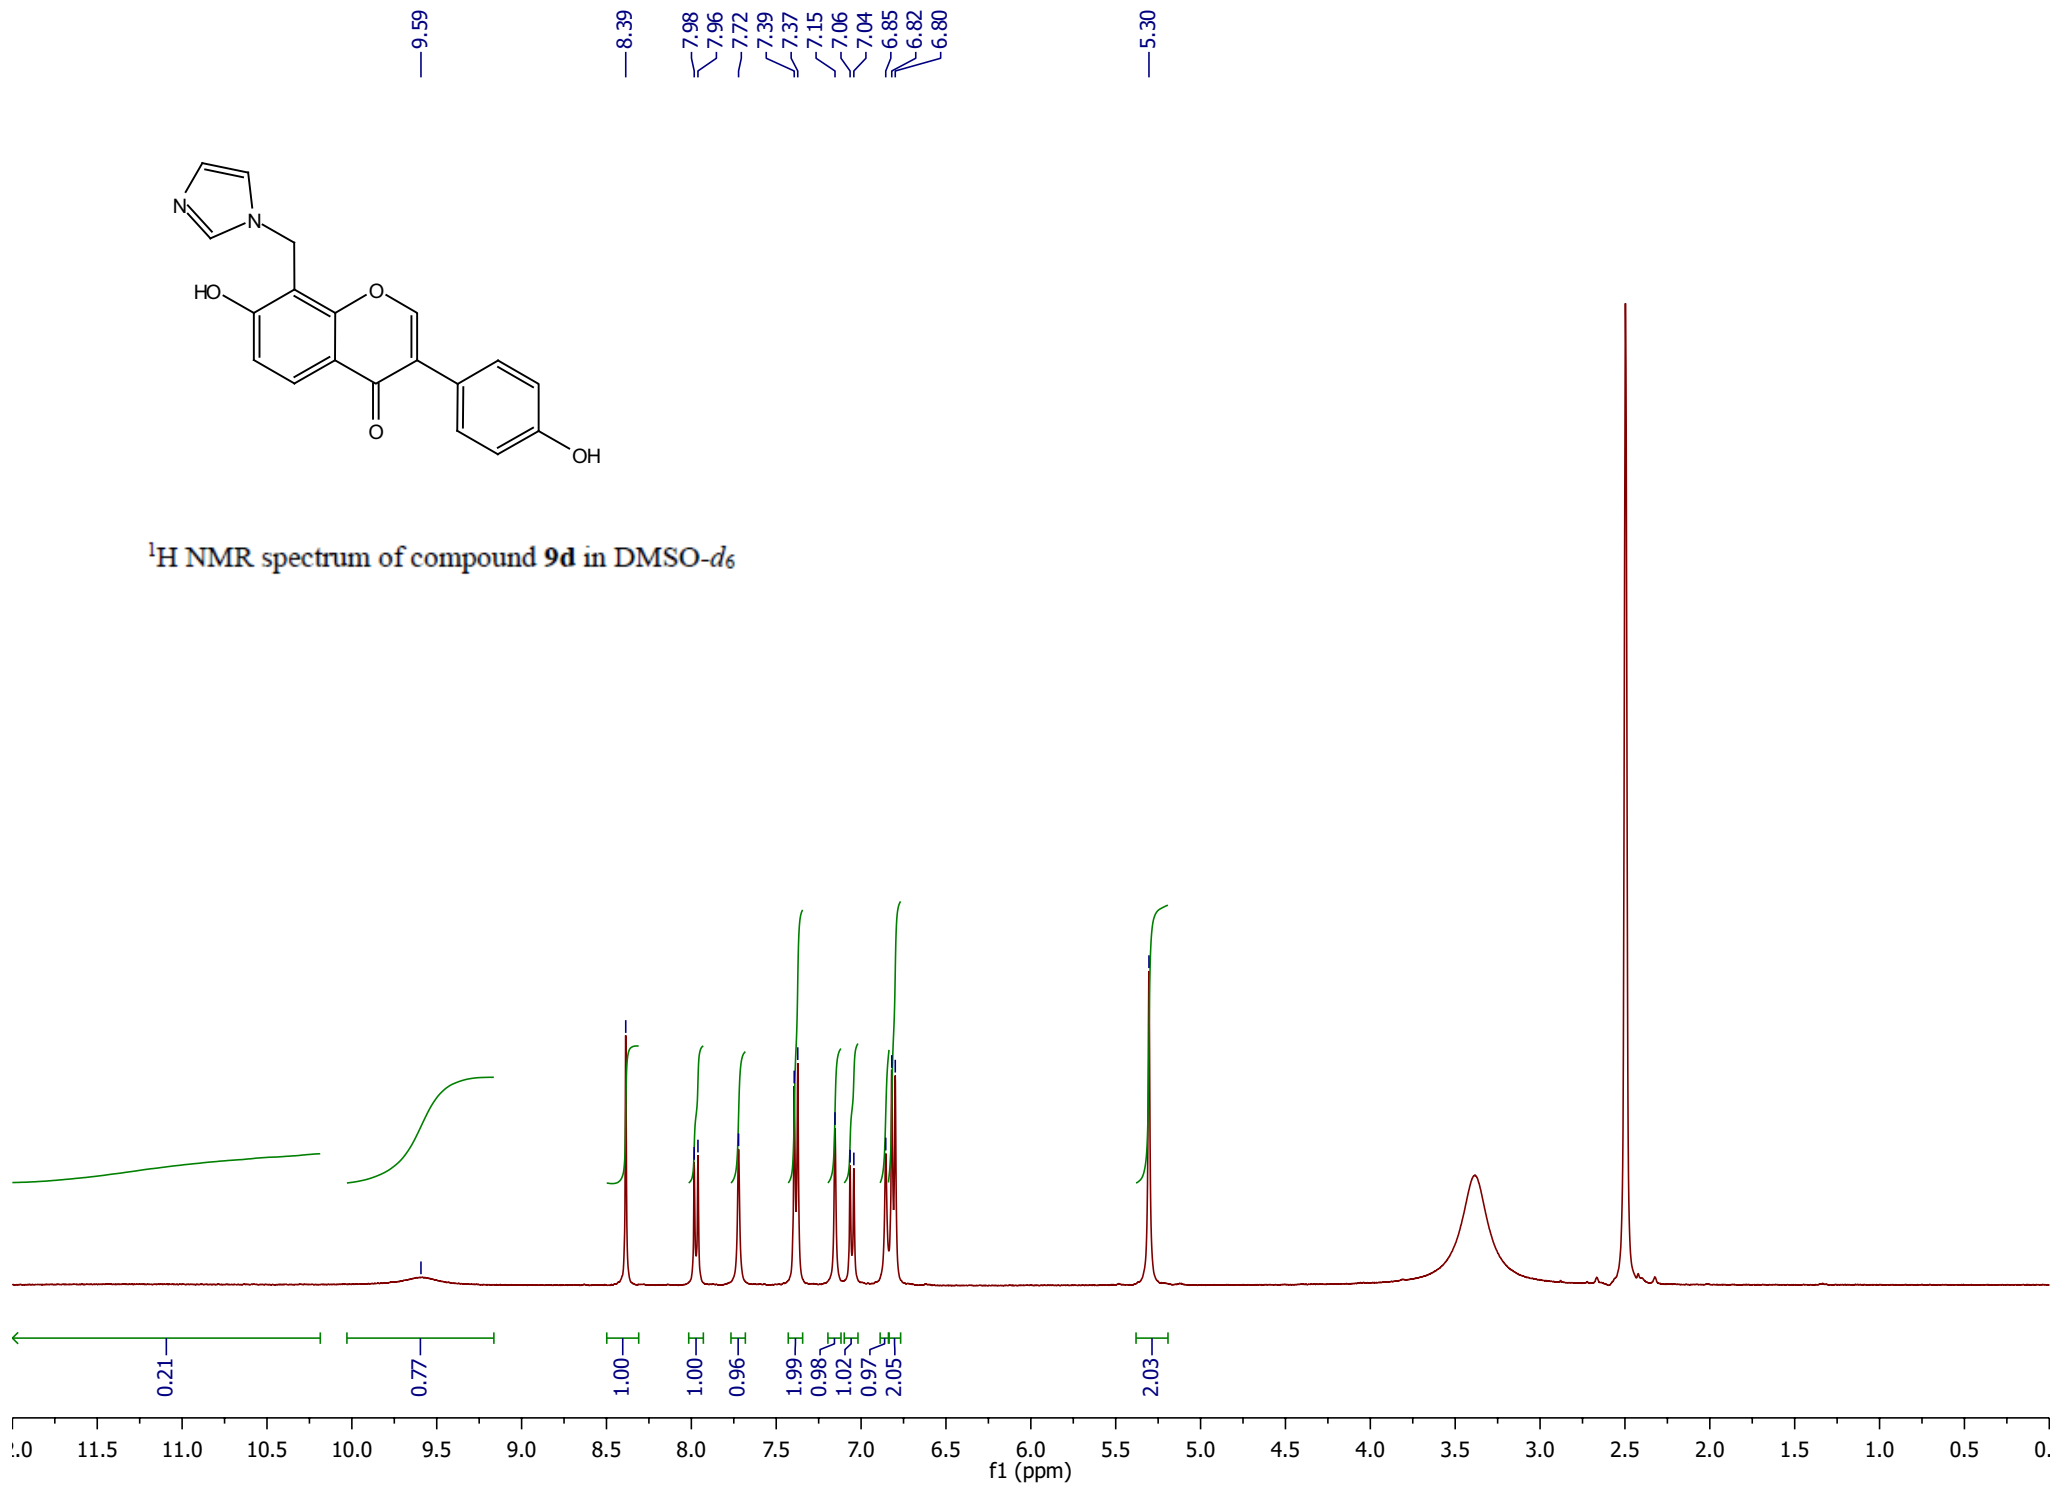

174.83  
160.85  
157.31  
155.46  
152.79  
137.44  
130.13  
128.22  
127.14  
123.52  
122.40  
119.59  
116.58  
115.08  
114.58  
110.38  
38.02

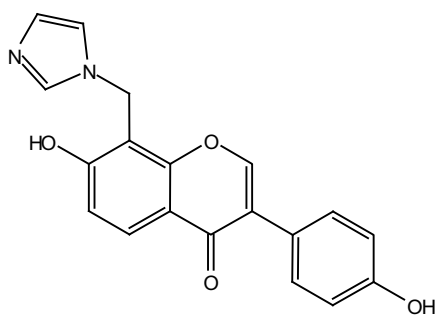

$^{13}\text{C}$  NMR spectrum of compound **9d** in  $\text{DMSO-}d_6$

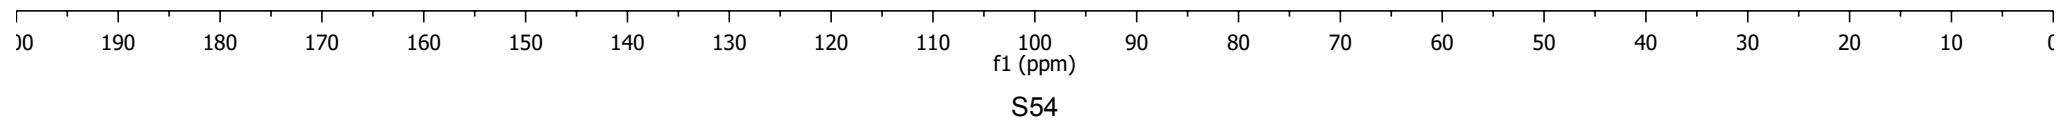

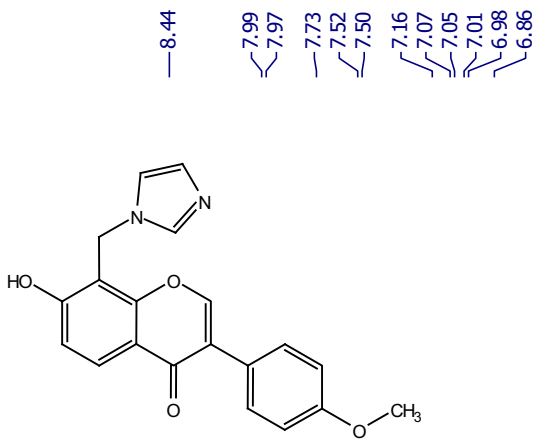

$^1\text{H}$  NMR spectrum of compound 9e in  $\text{DMSO-}d_6$

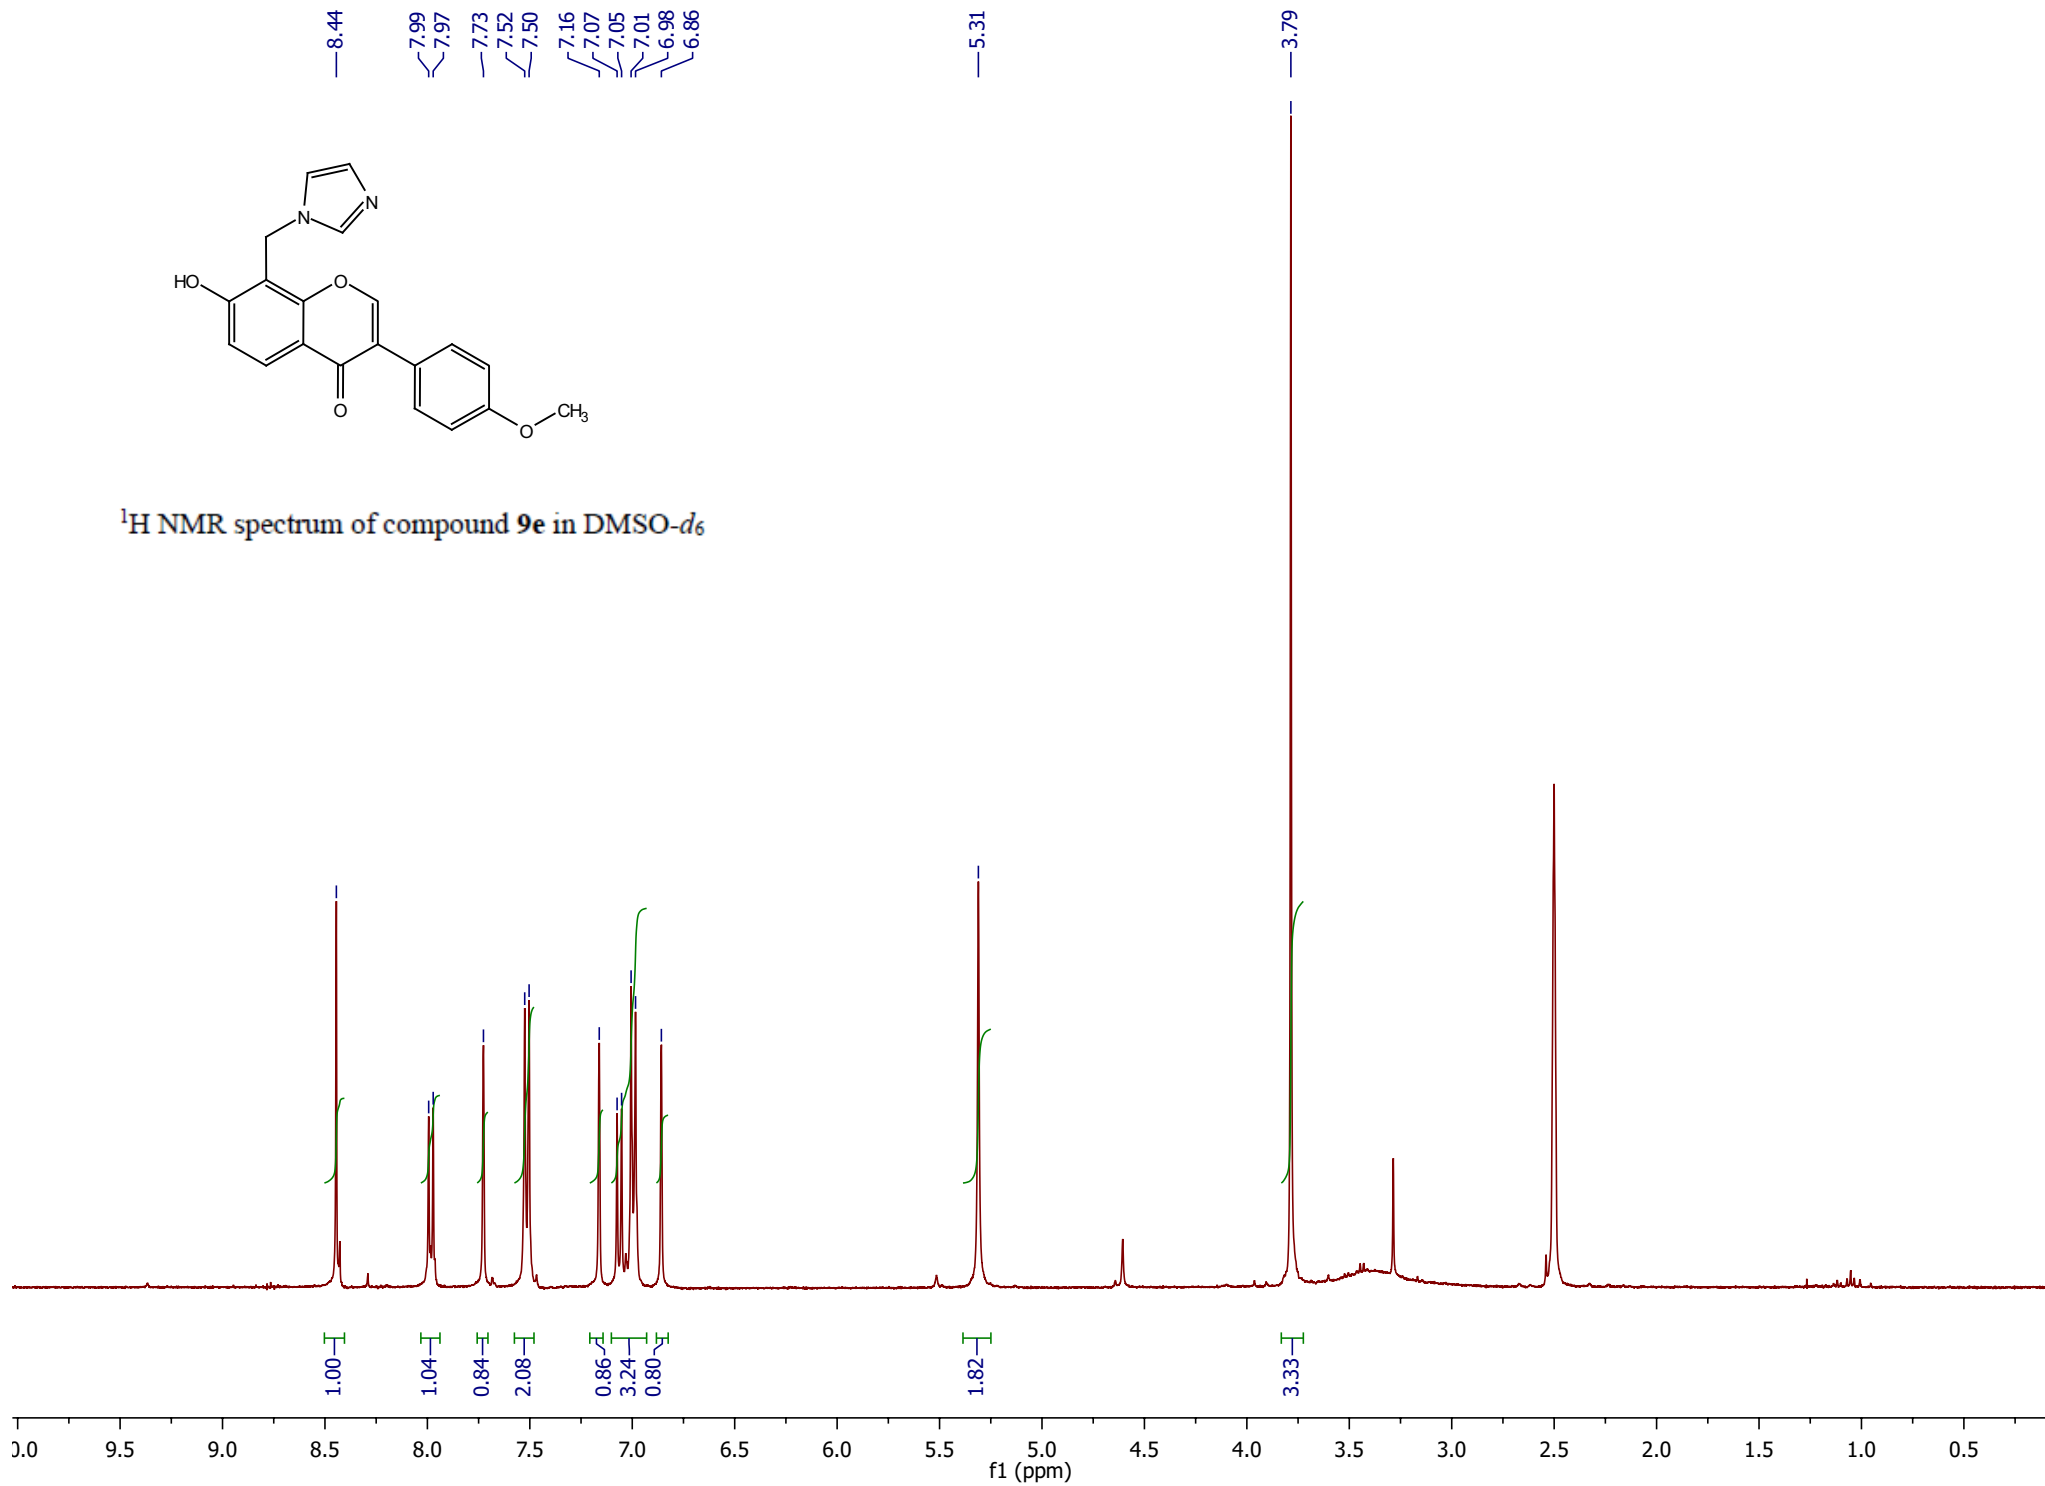

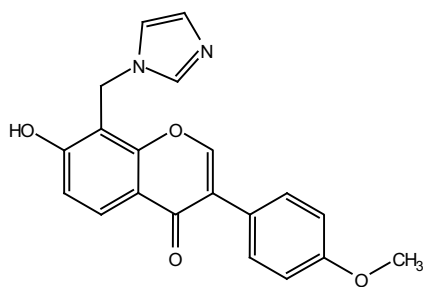

$^{13}\text{C}$  NMR spectrum of compound 9e in  $\text{DMSO-}d_6$

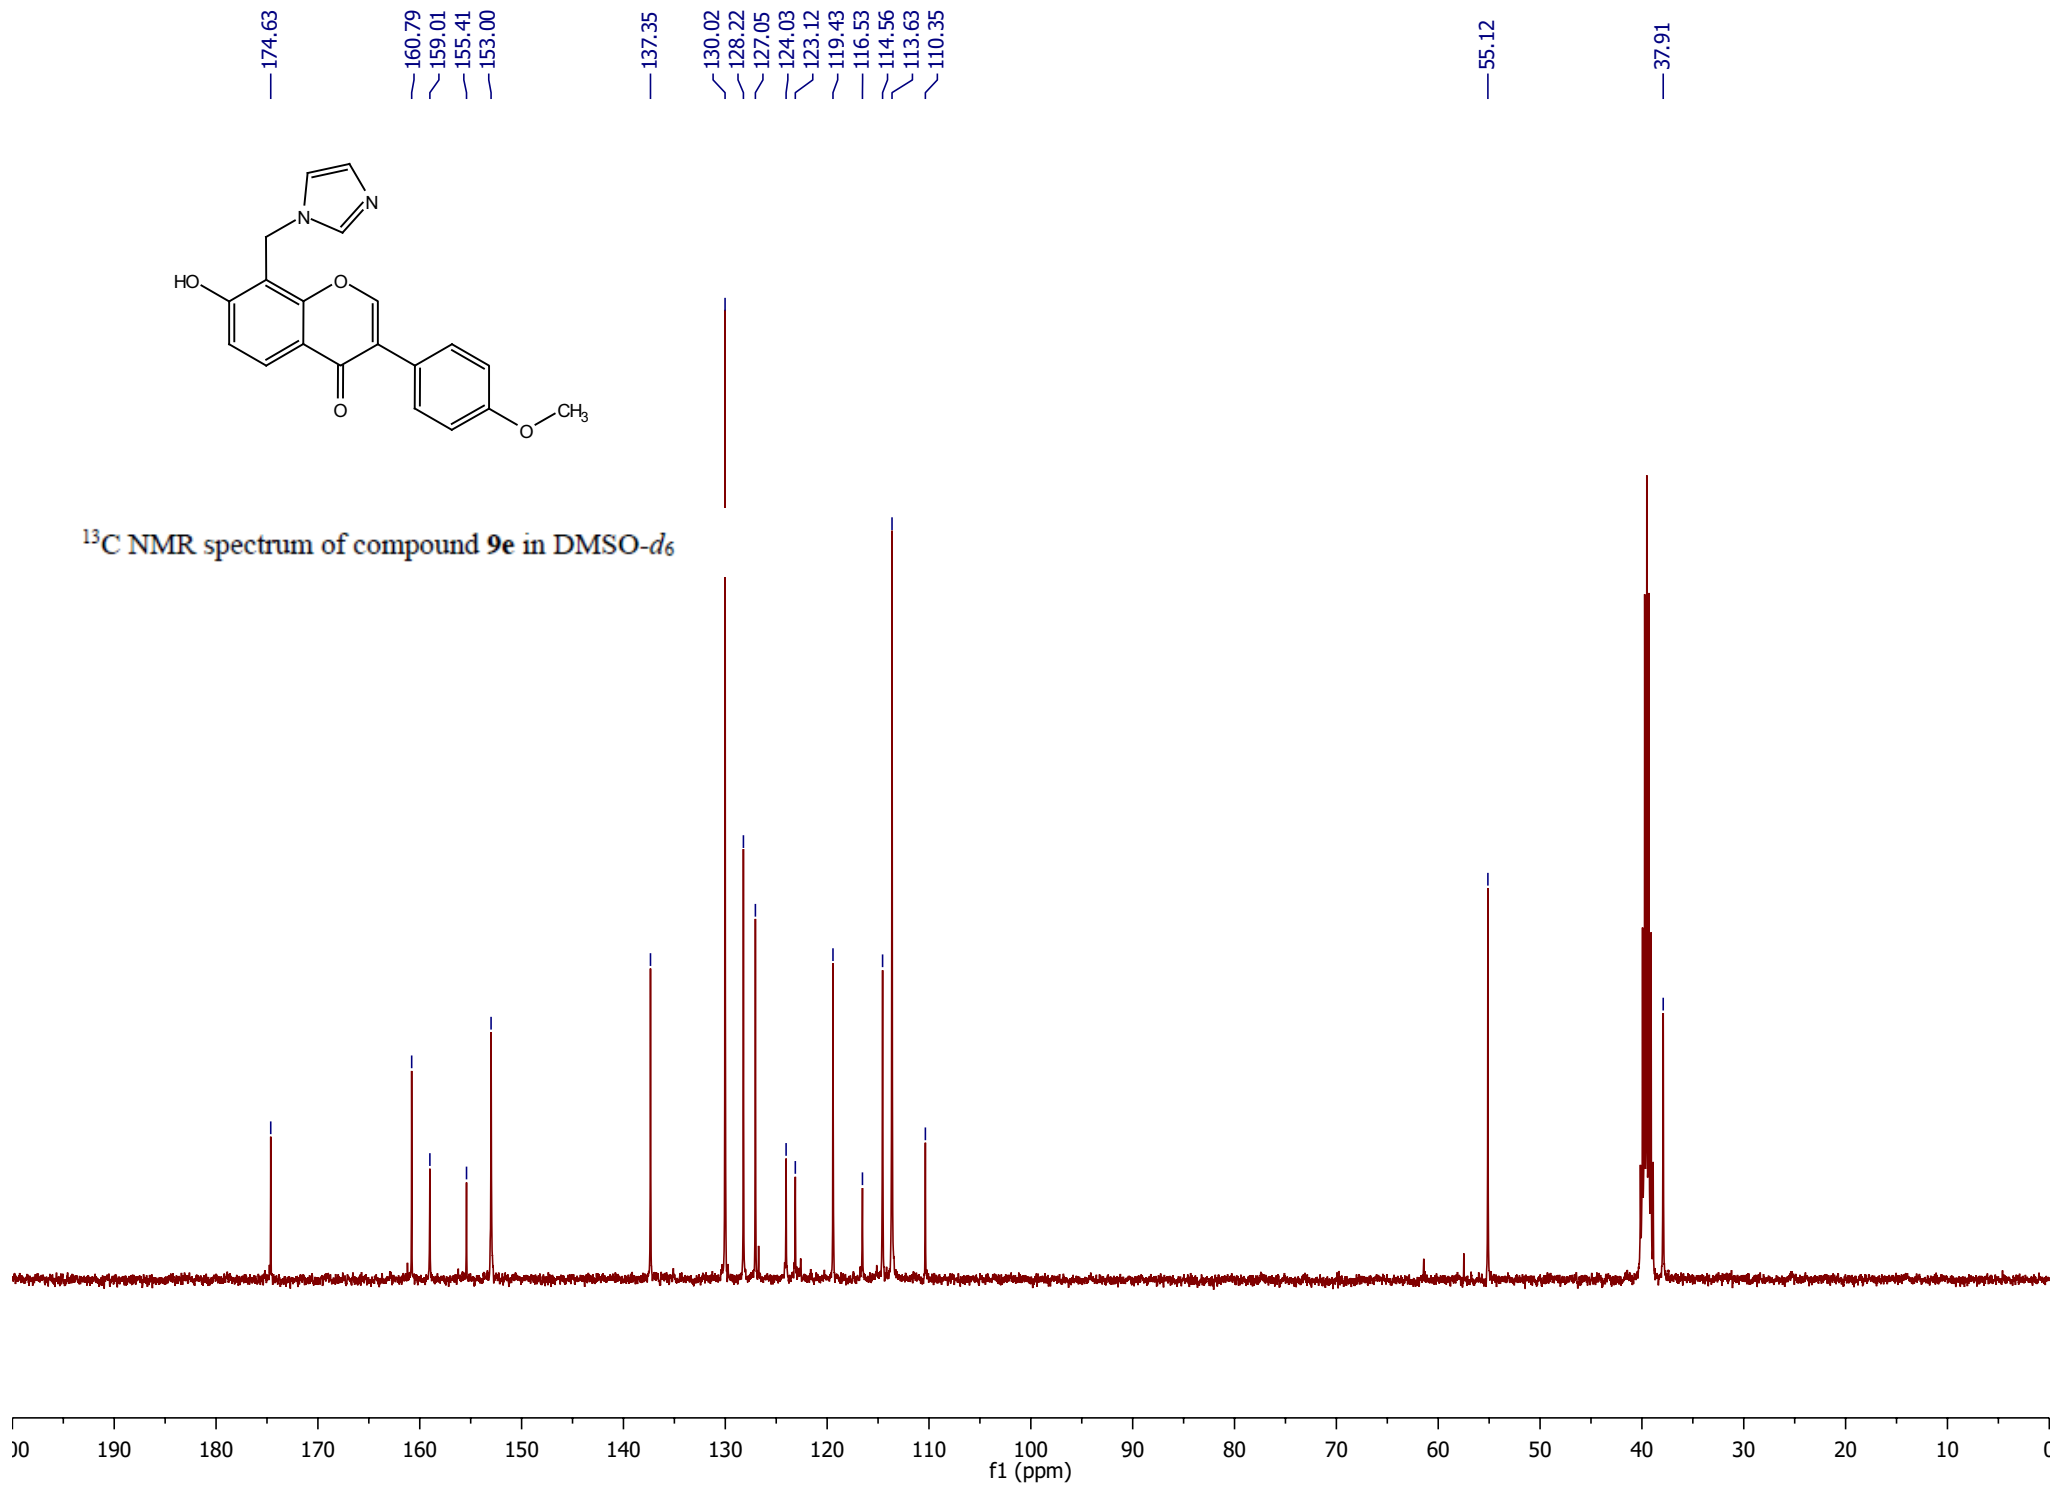



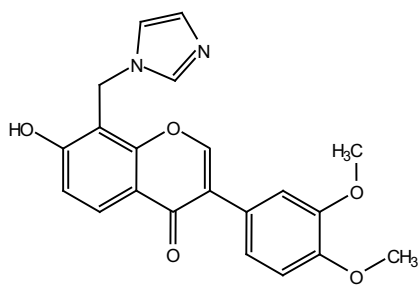

$^1\text{H}$  NMR spectrum of compound **9f** in  $\text{DMSO-}d_6$

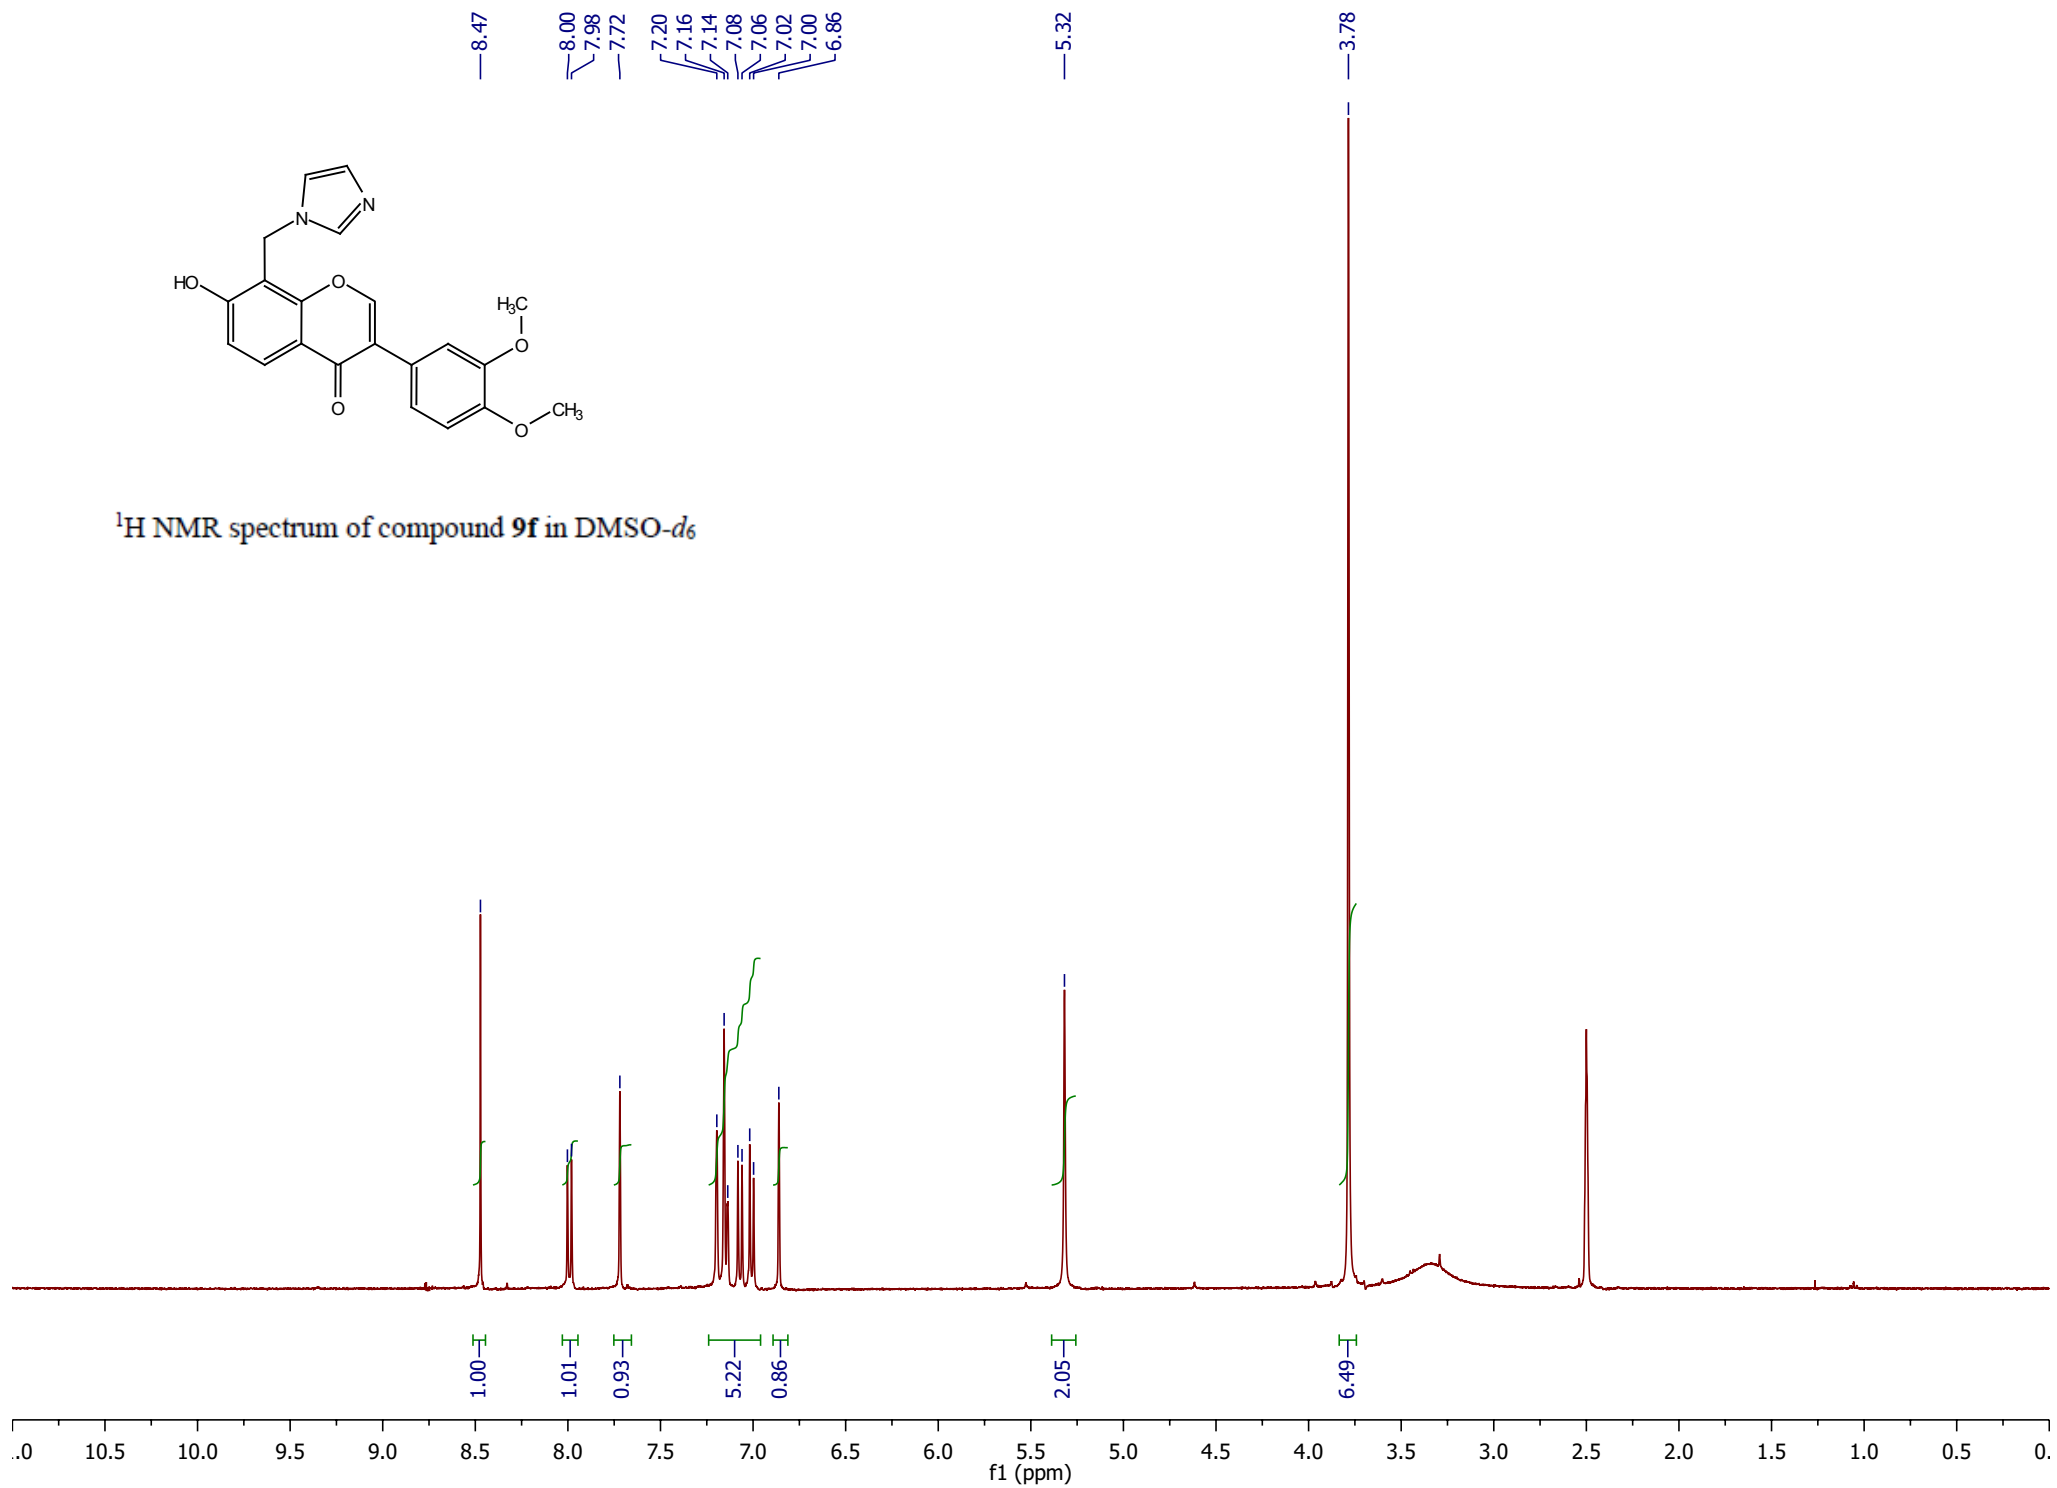

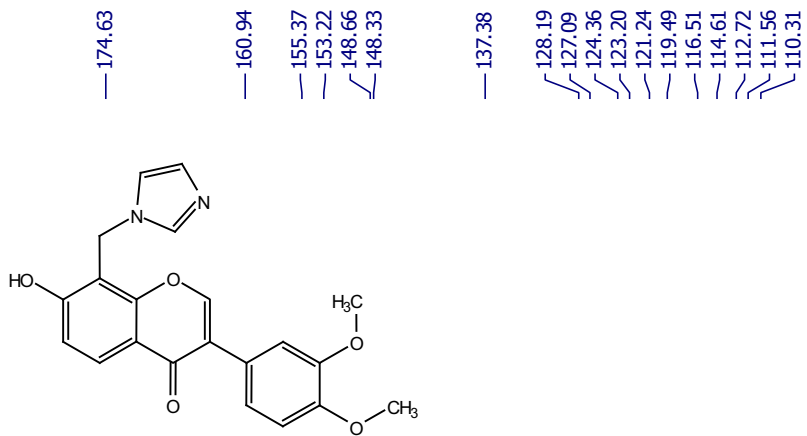

<sup>13</sup>C NMR spectrum of compound **9f** in DMSO-*d*<sub>6</sub>

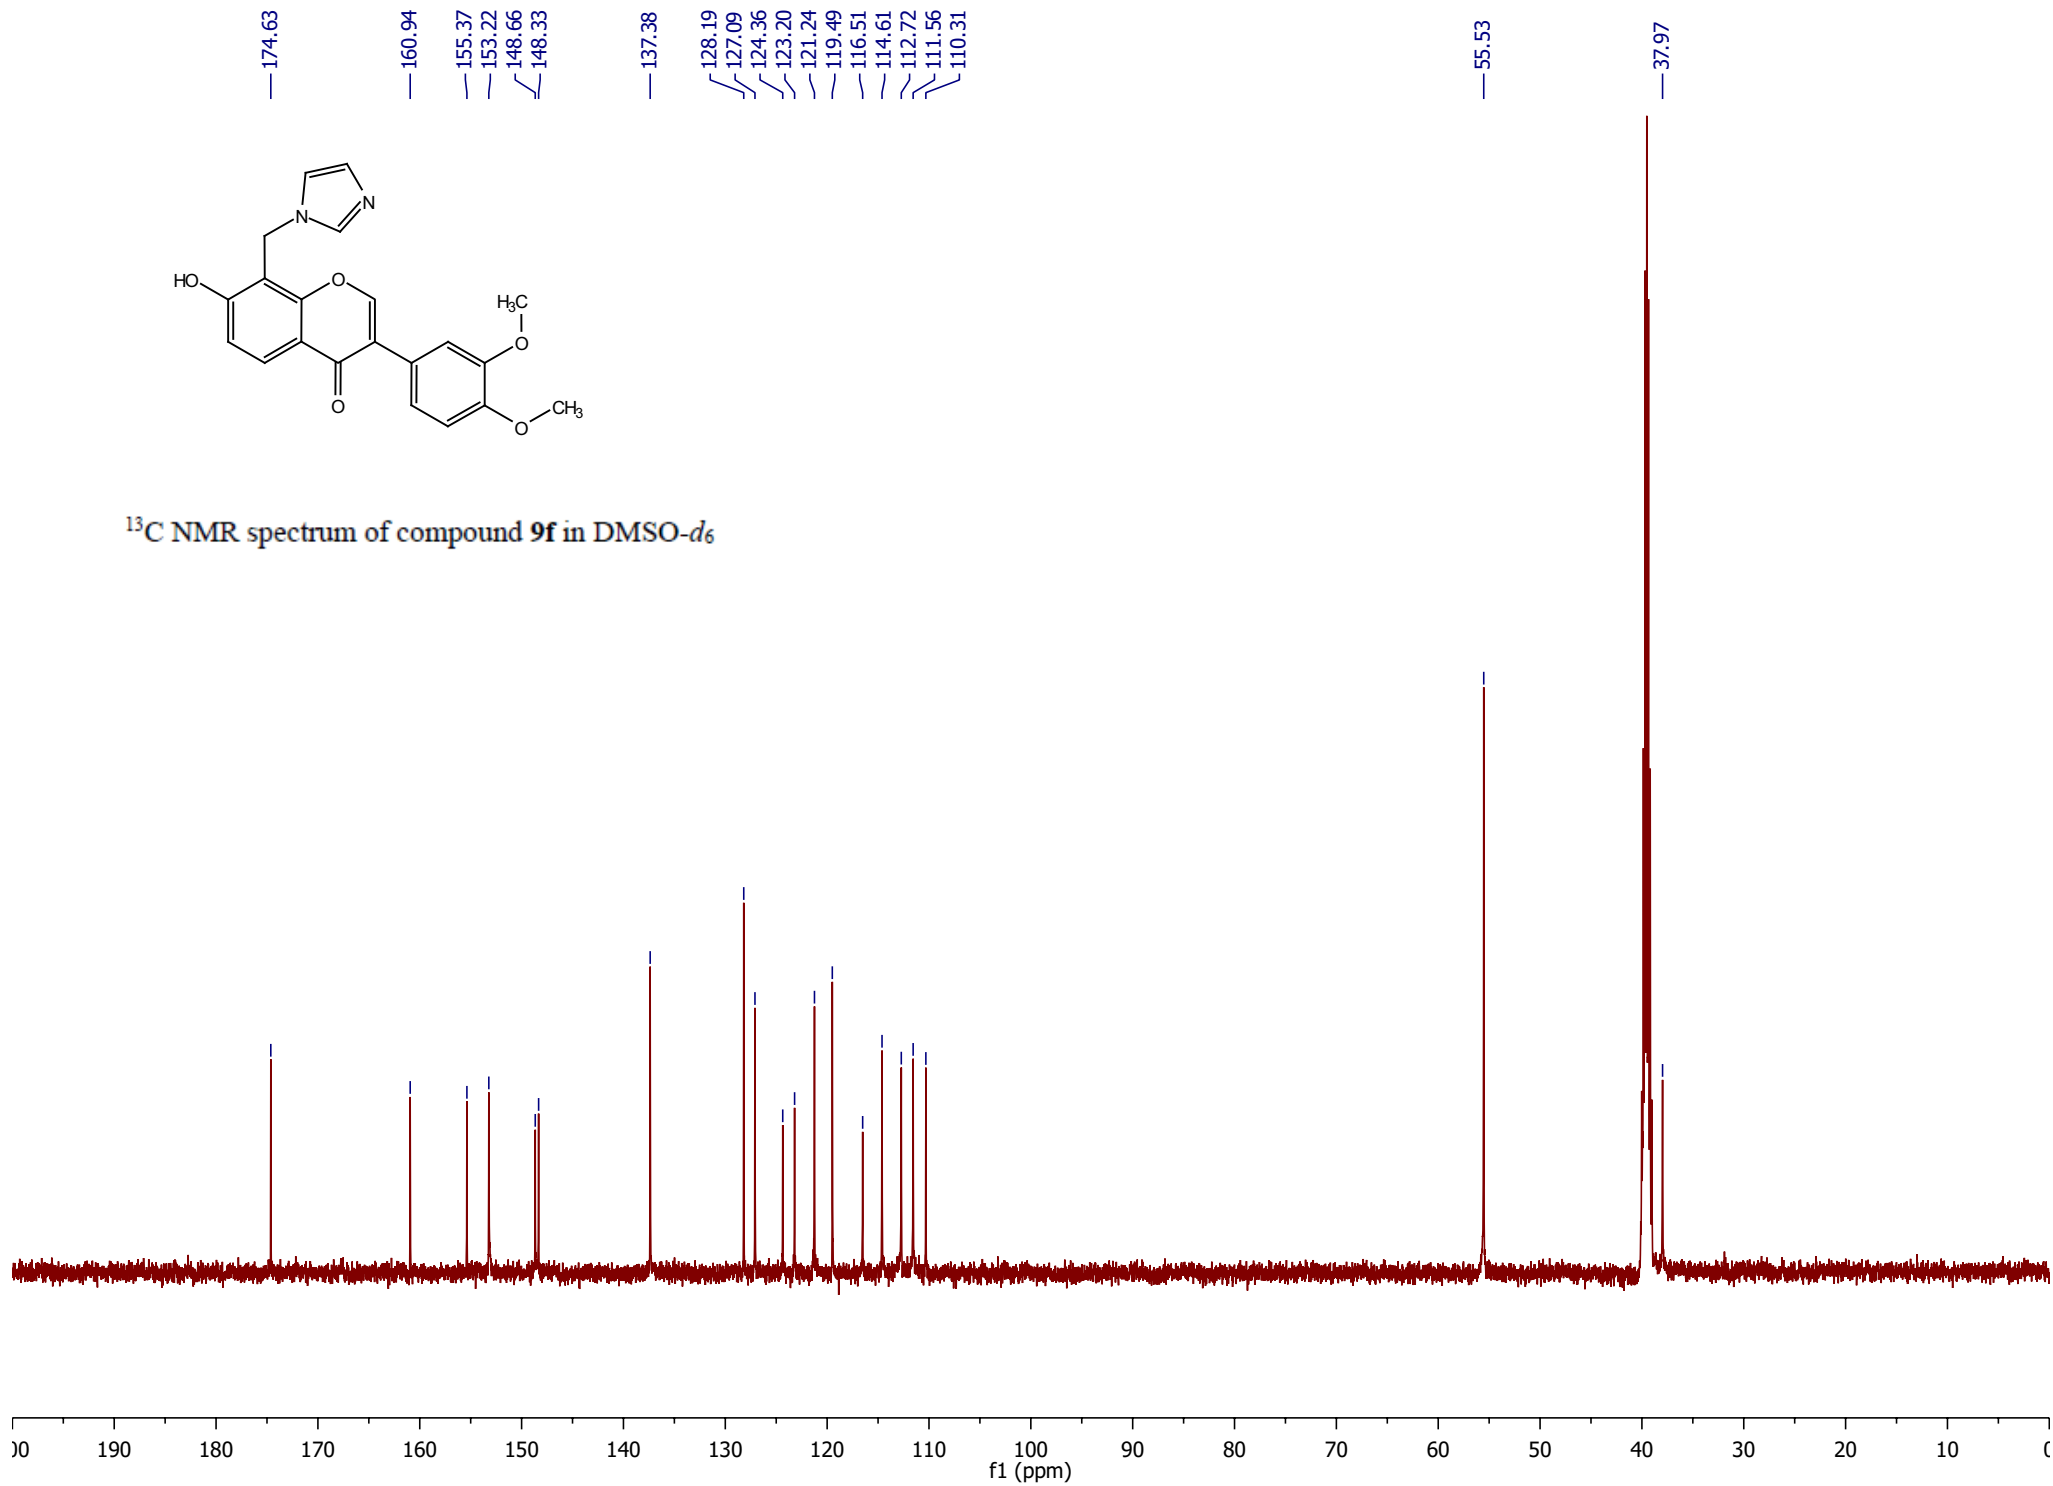

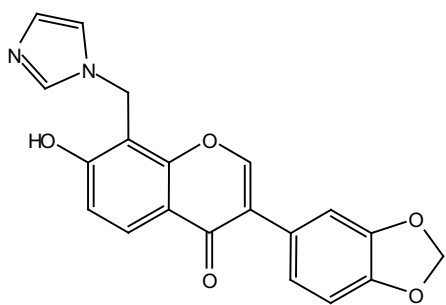

<sup>1</sup>H NMR spectrum of compound **9g** in DMSO-*d*<sub>6</sub>

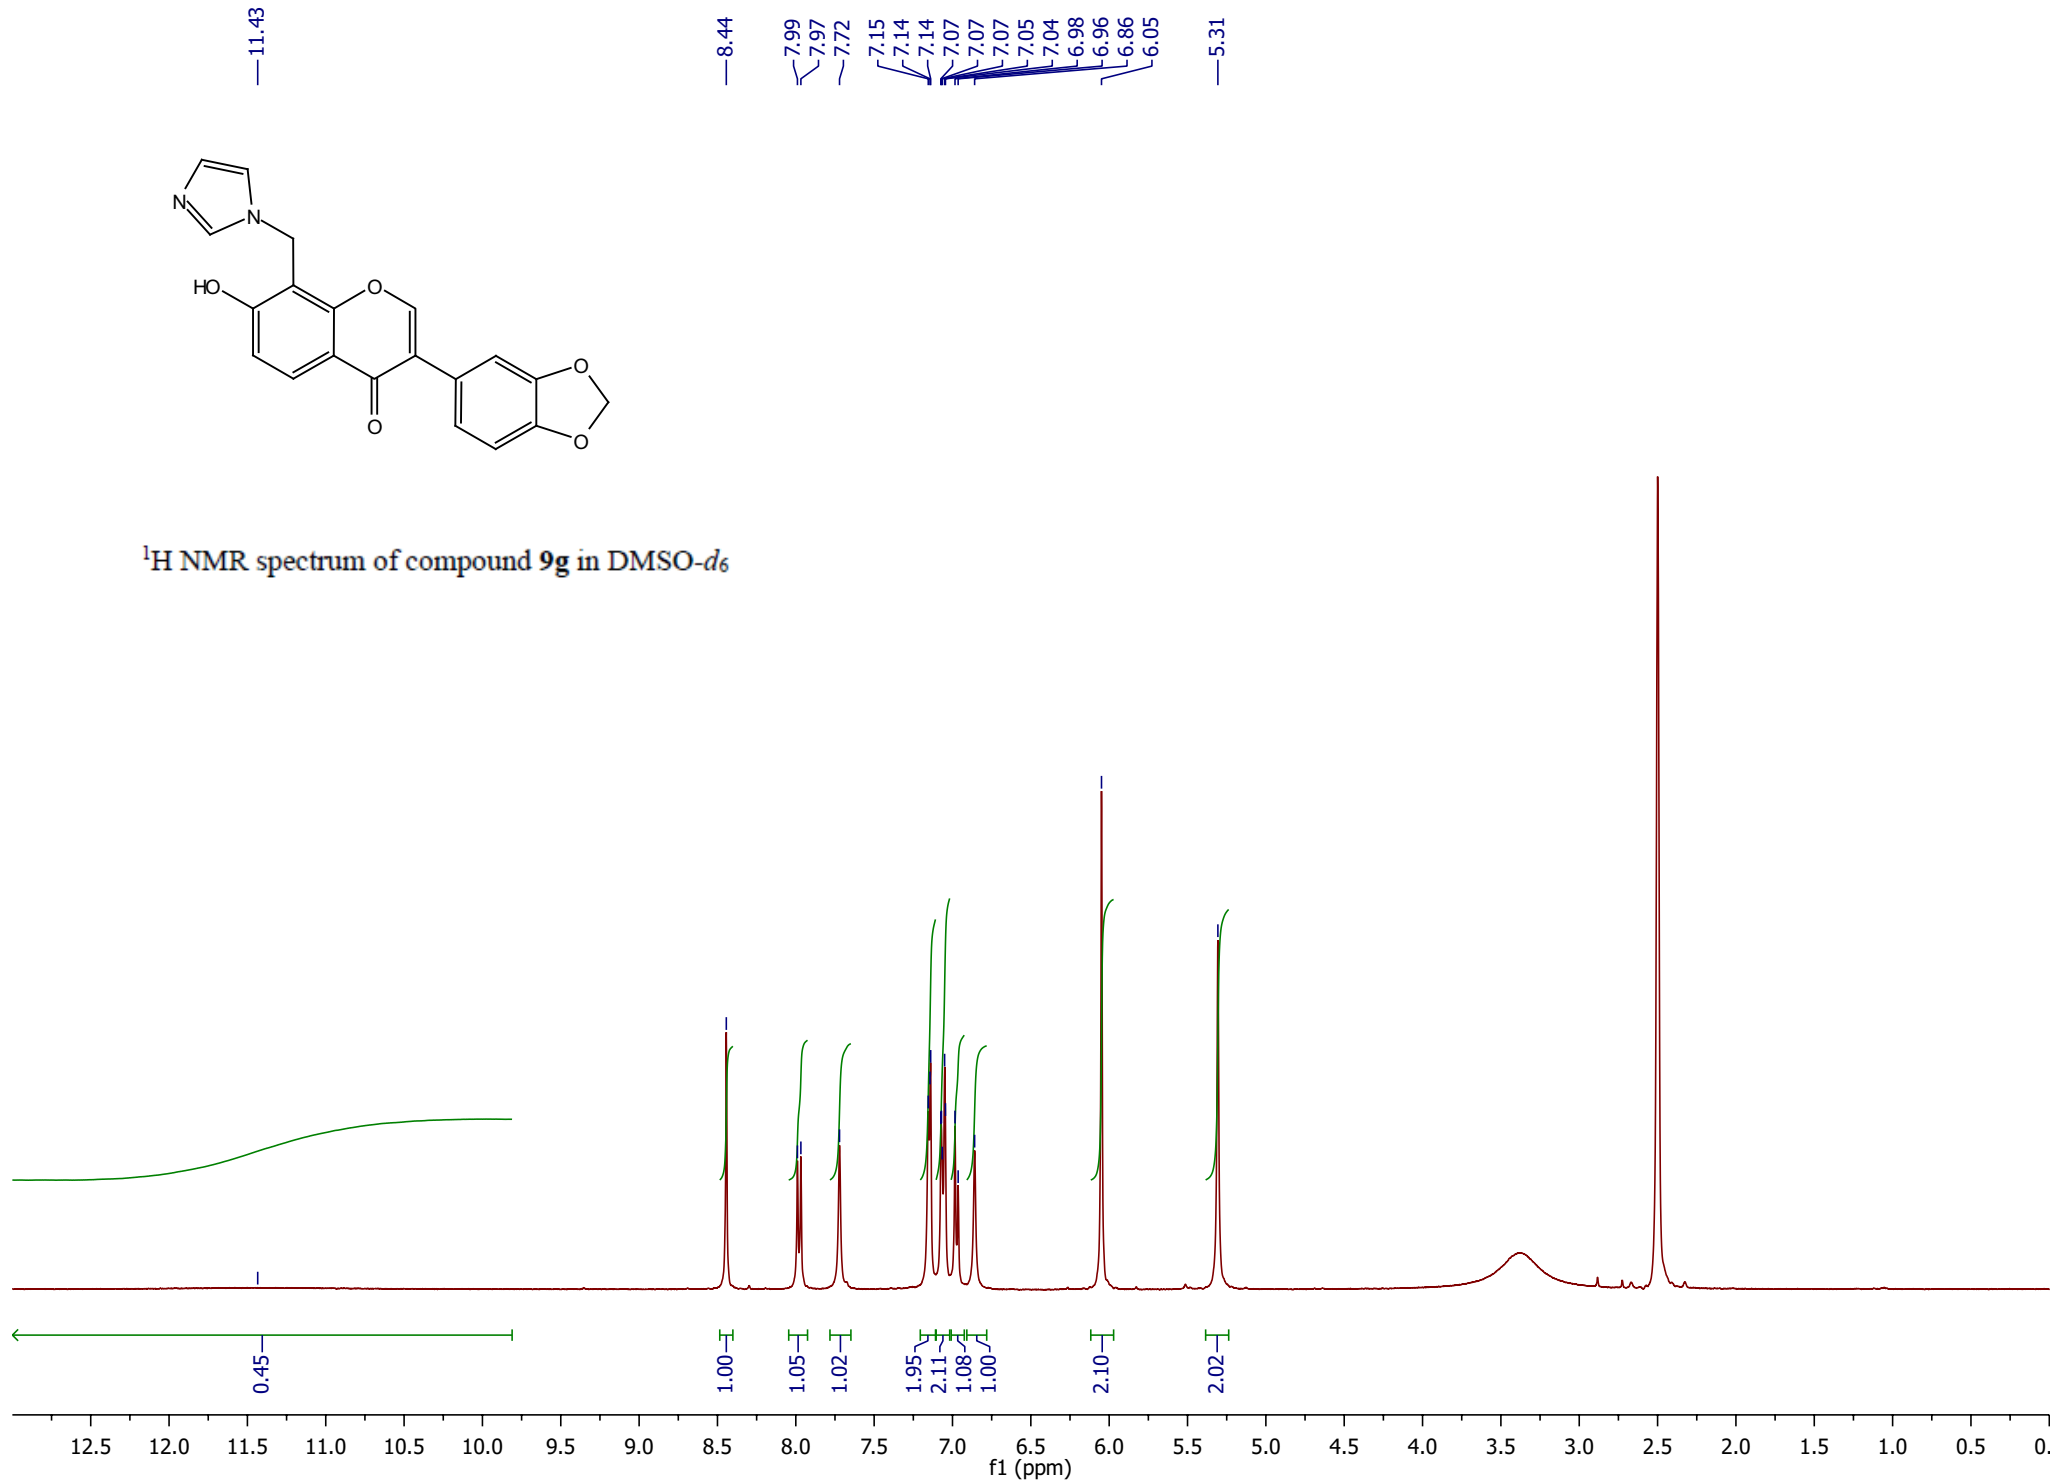

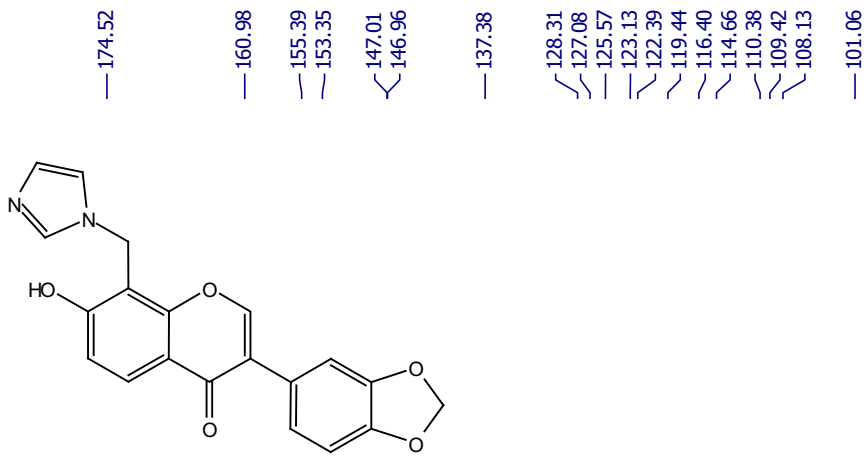

$^{13}\text{C}$  NMR spectrum of compound **9g** in  $\text{DMSO-}d_6$

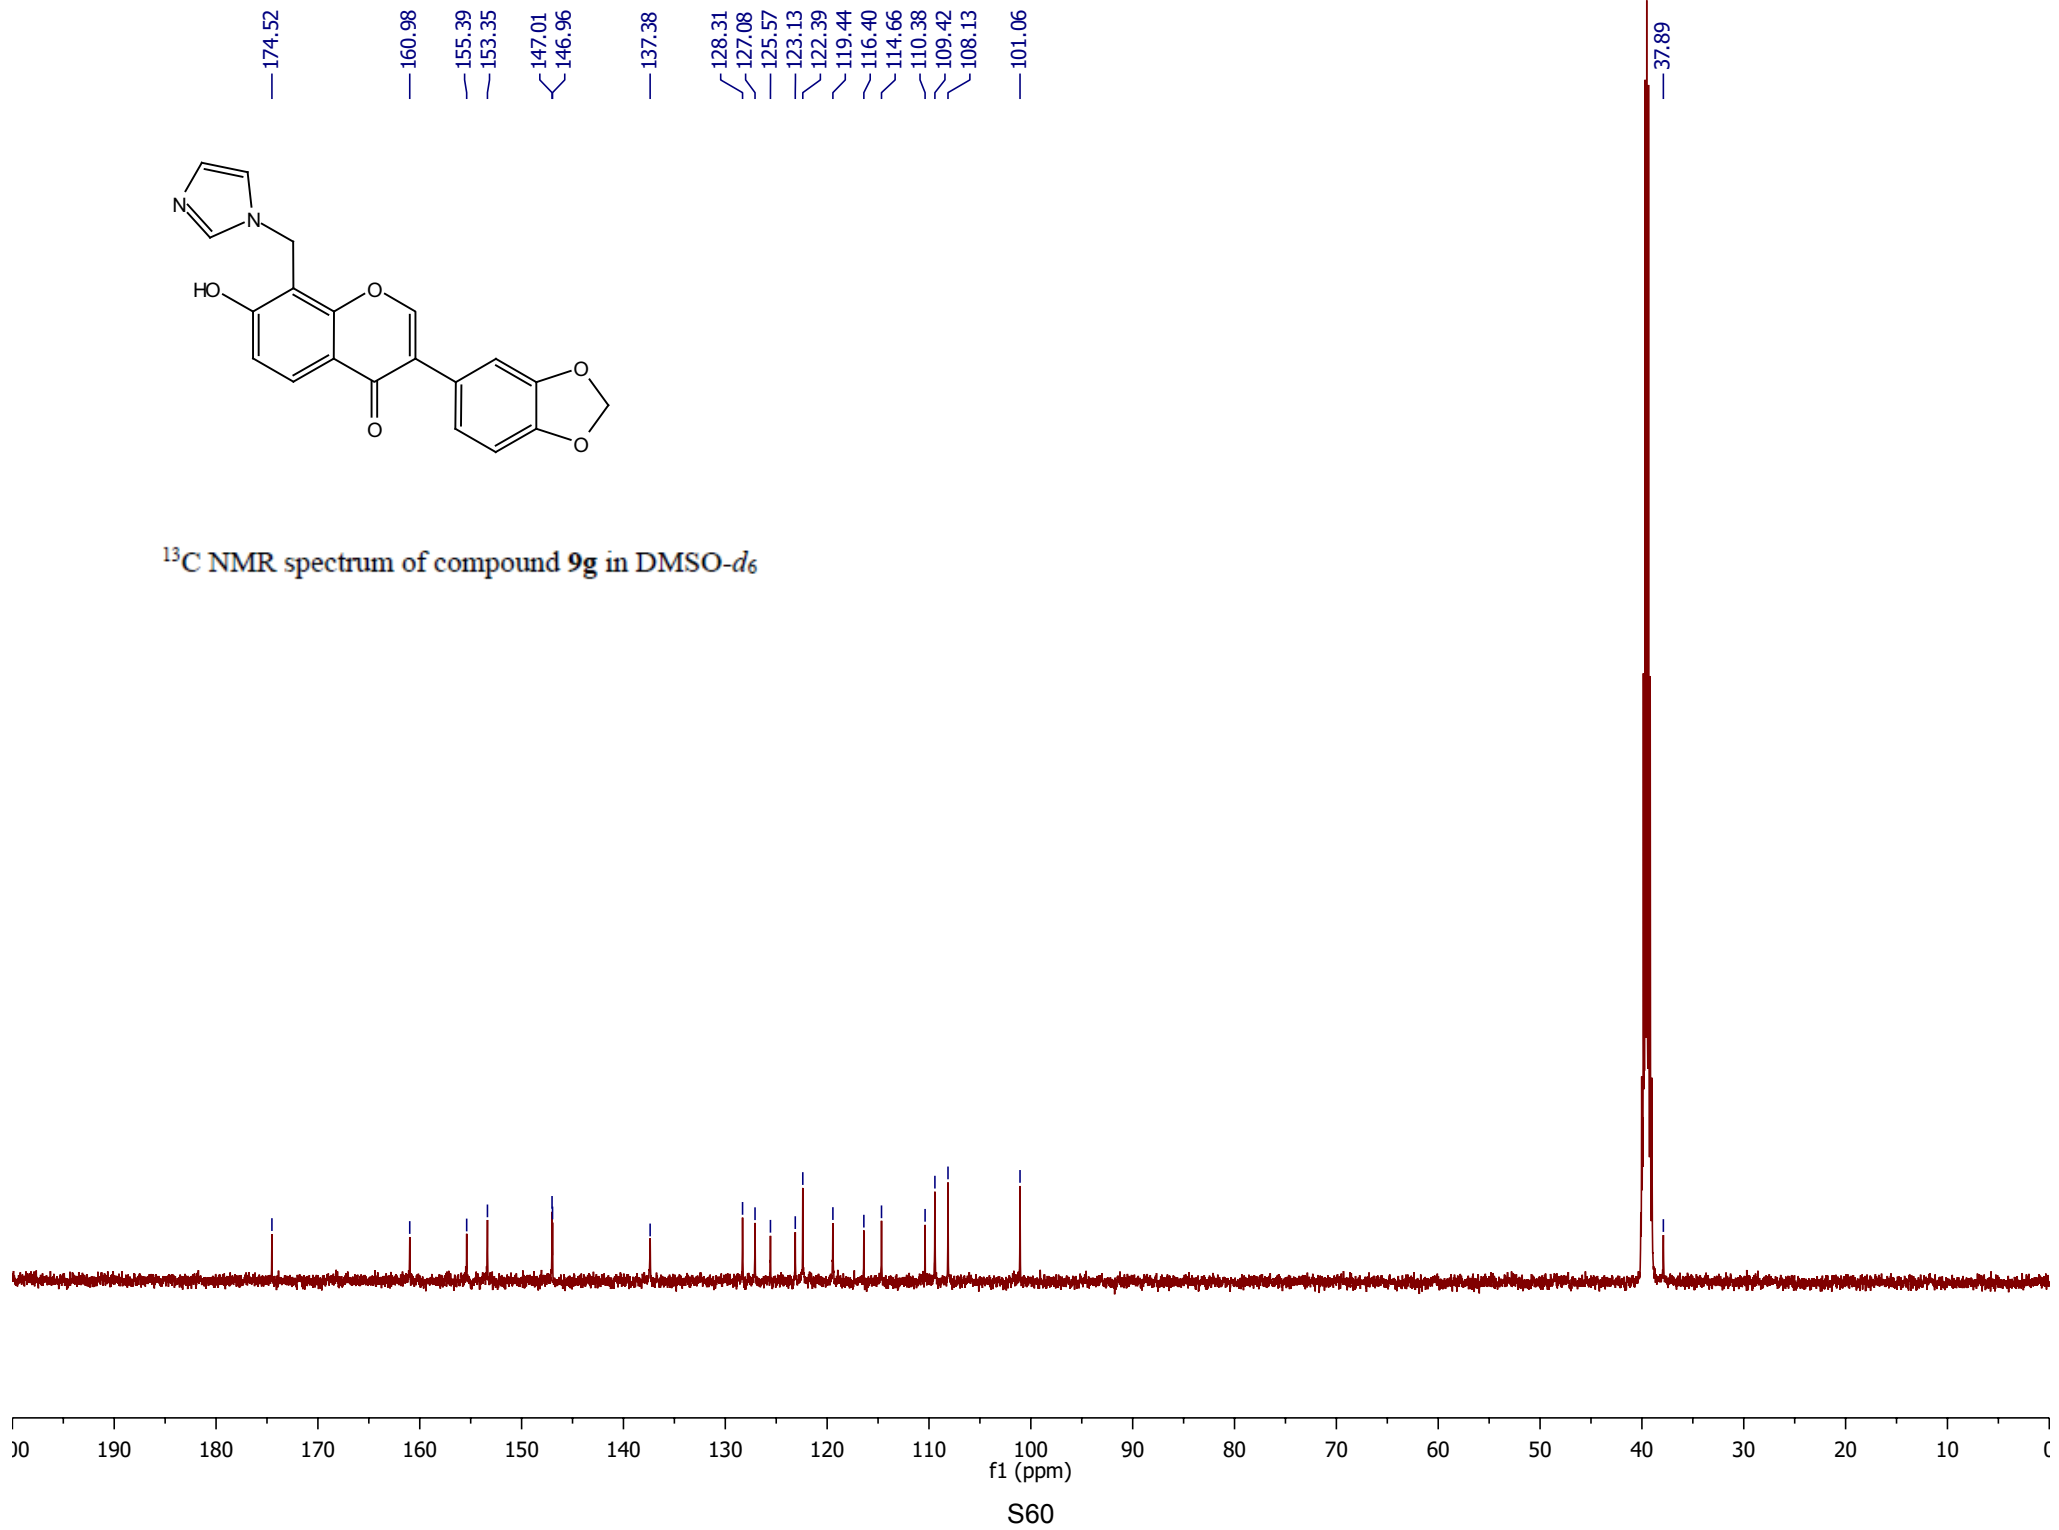

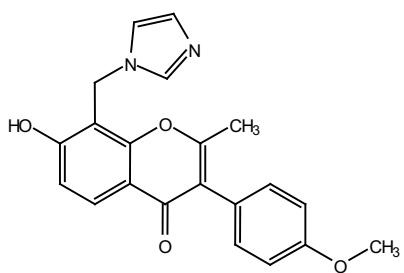

$^1\text{H}$  NMR spectrum of compound **9h** in  $\text{DMSO-}d_6$

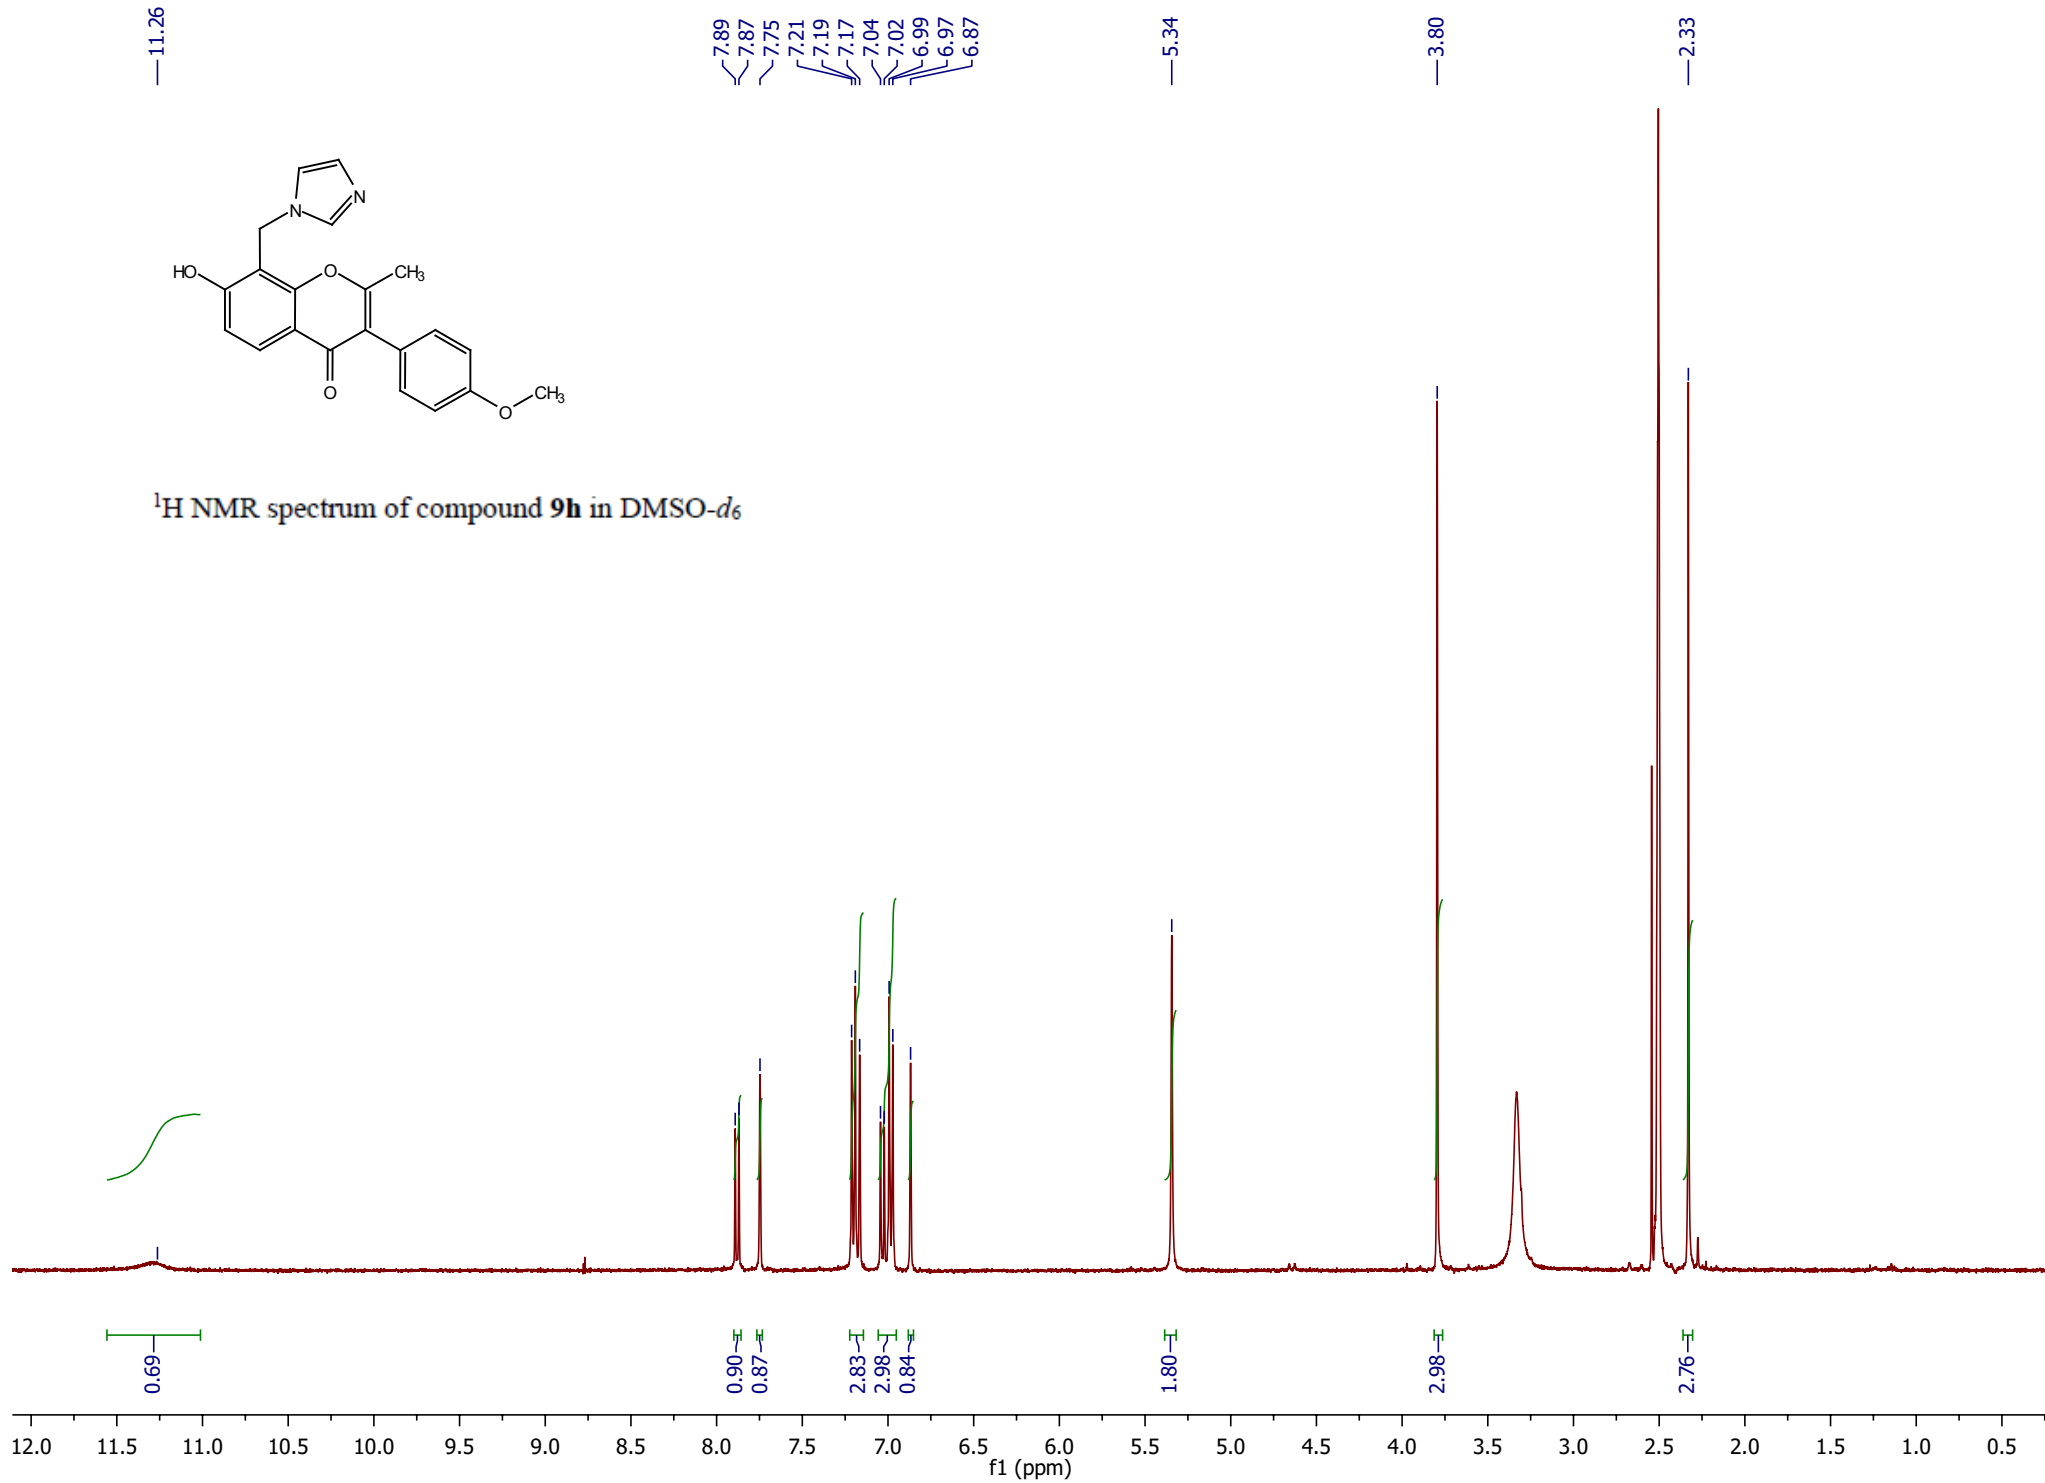



<sup>13</sup>C NMR spectrum of compound 9h in DMSO-*d*<sub>6</sub>

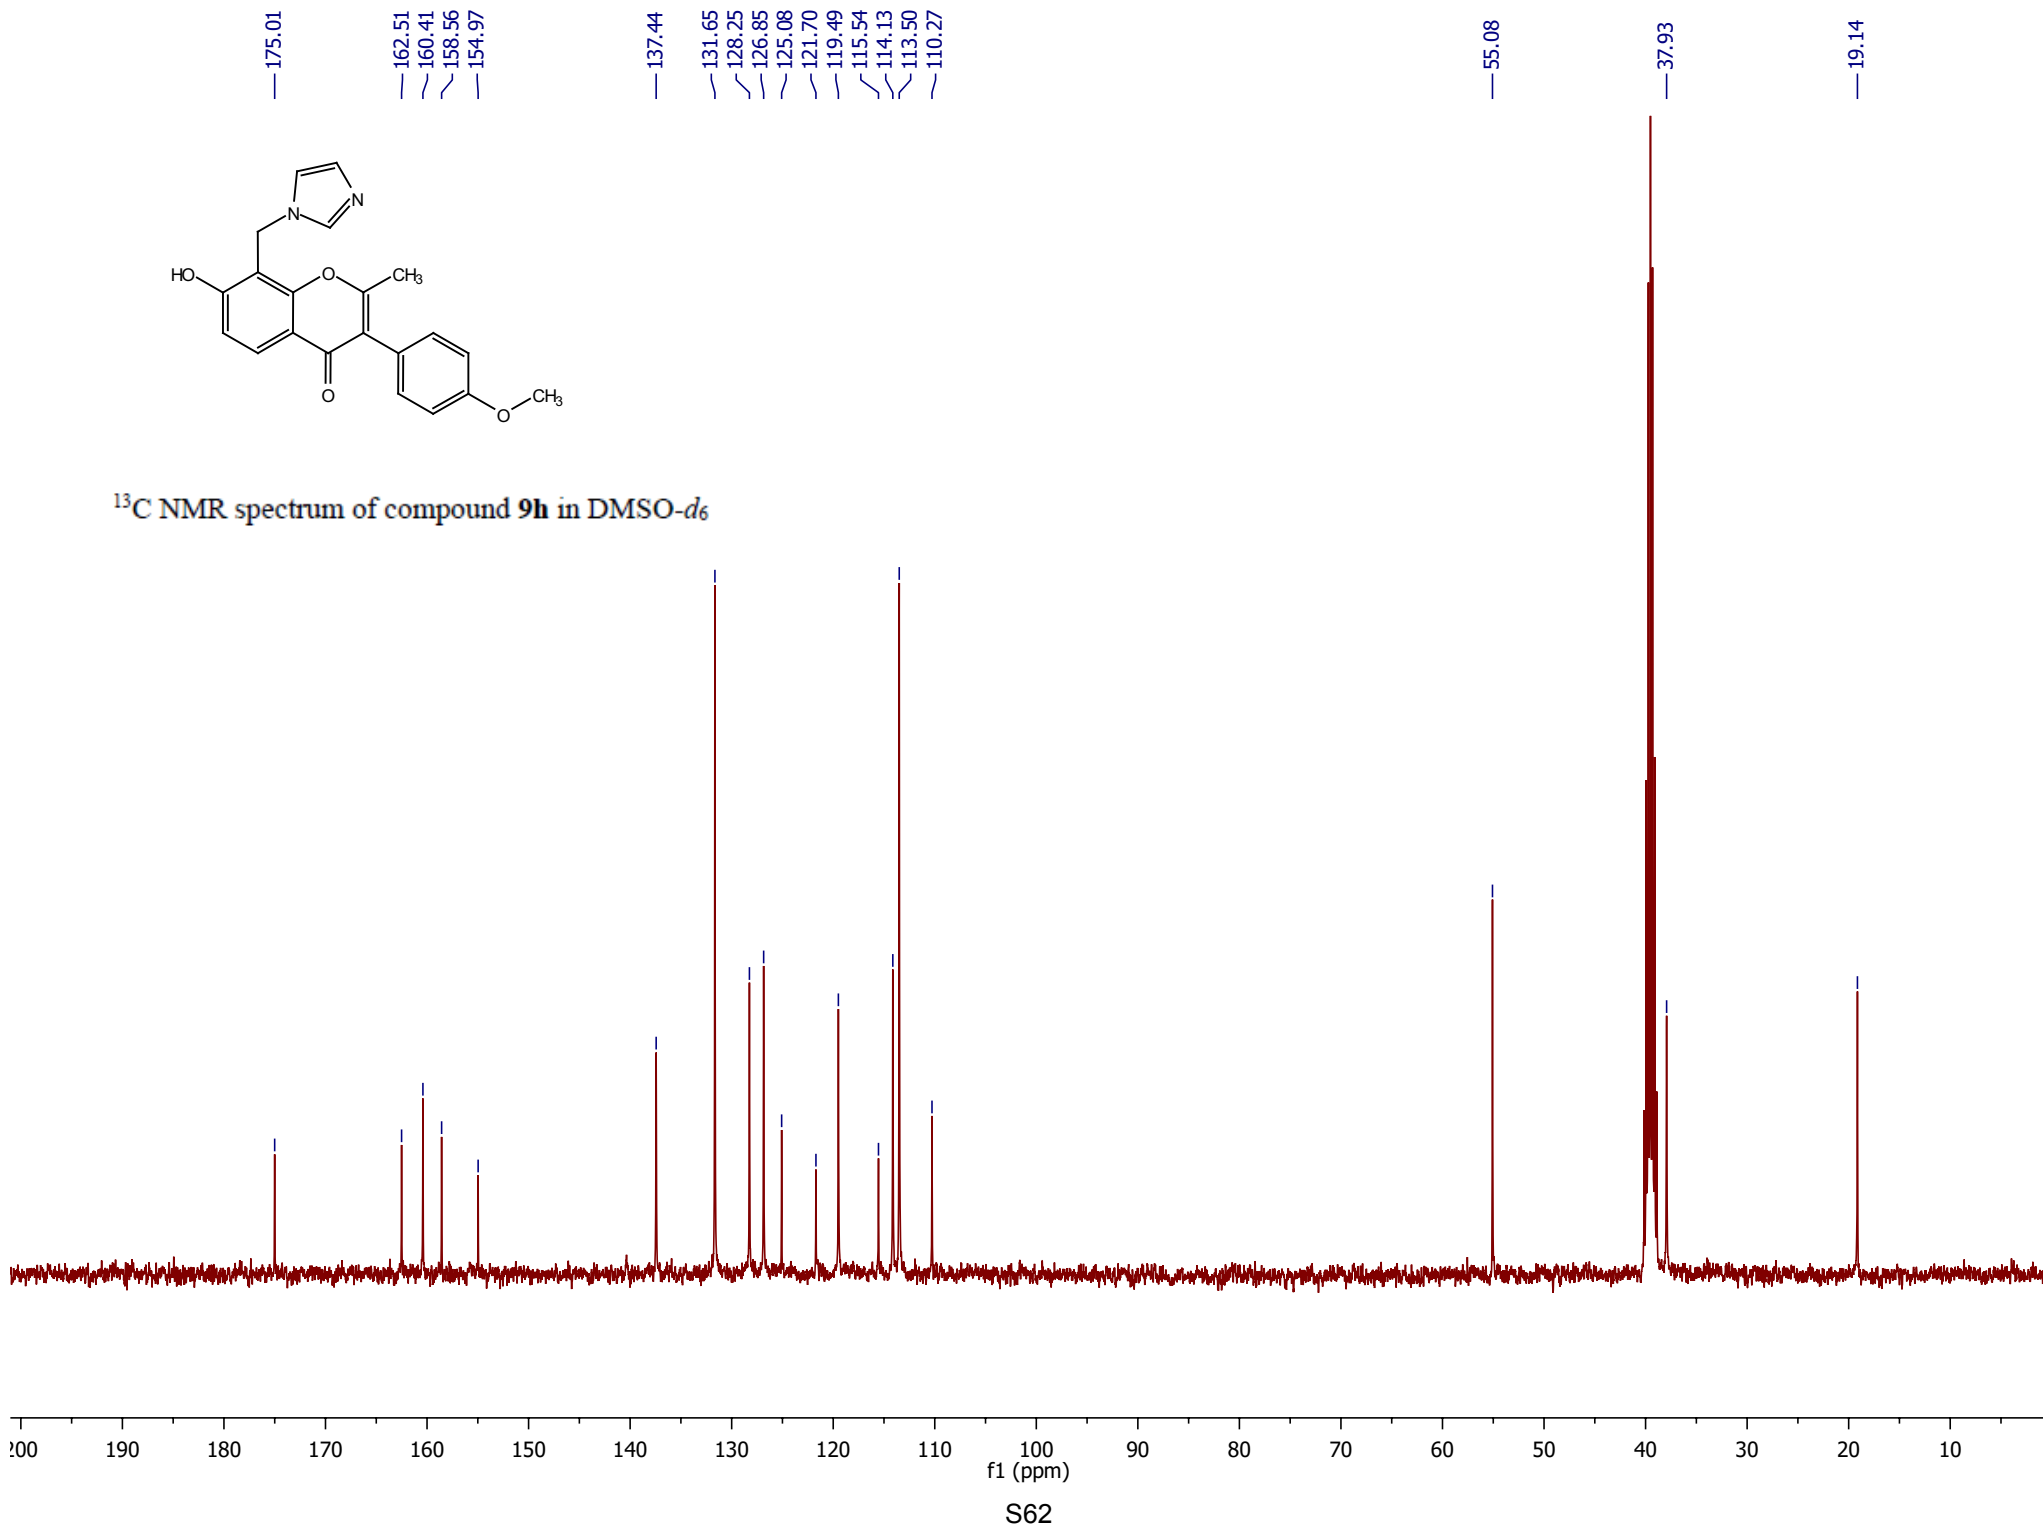

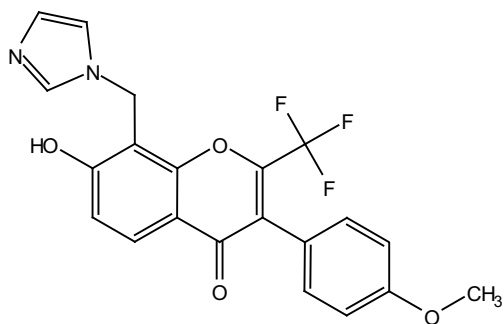

$^1\text{H}$  NMR spectrum of compound **9i** in  $\text{DMSO-}d_6$

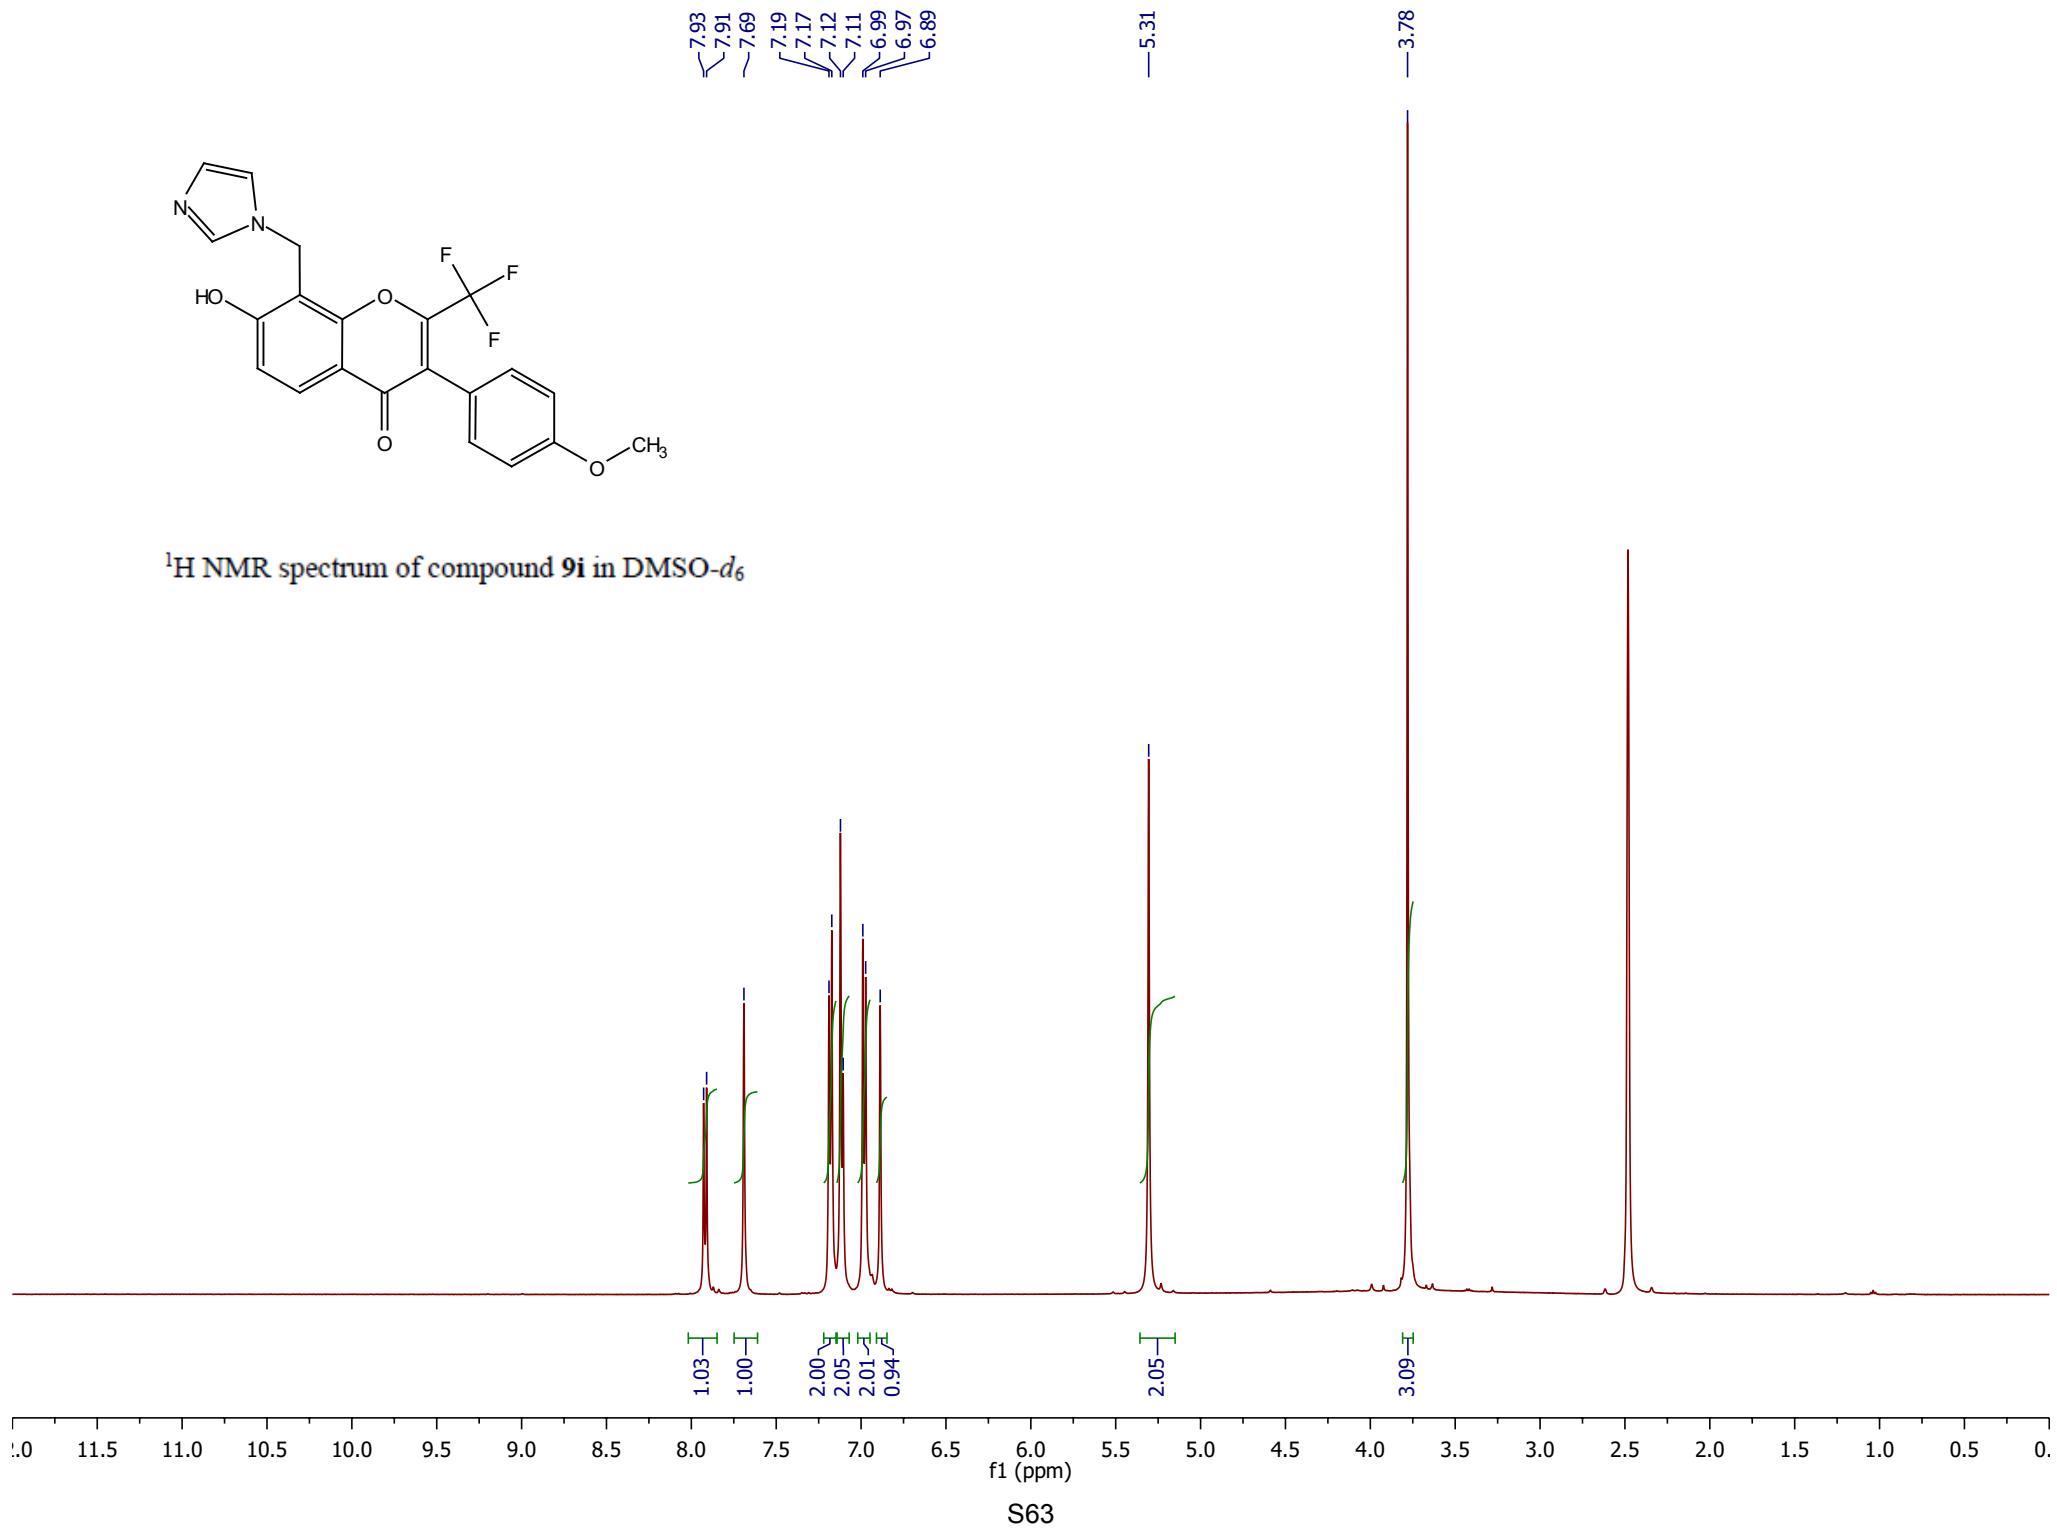

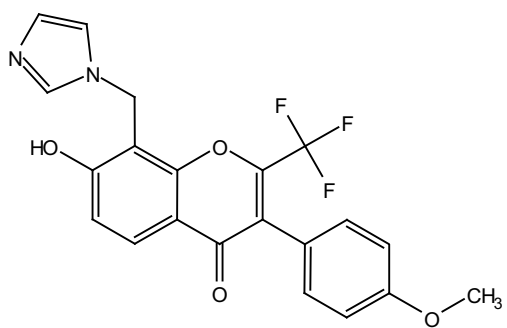

<sup>13</sup>C NMR spectrum of compound **9i** in DMSO-*d*<sub>6</sub>

- 175.35
- 162.04
- 159.42
- 154.42
- 146.76
- 146.48
- 146.20
- 145.92
- 137.18
- 131.15
- 128.23
- 127.26
- 124.73
- 122.81
- 121.07
- 120.61
- 119.34
- 118.41
- 116.22
- 115.65
- 115.31
- 113.40
- 110.51
- 55.11
- 37.88

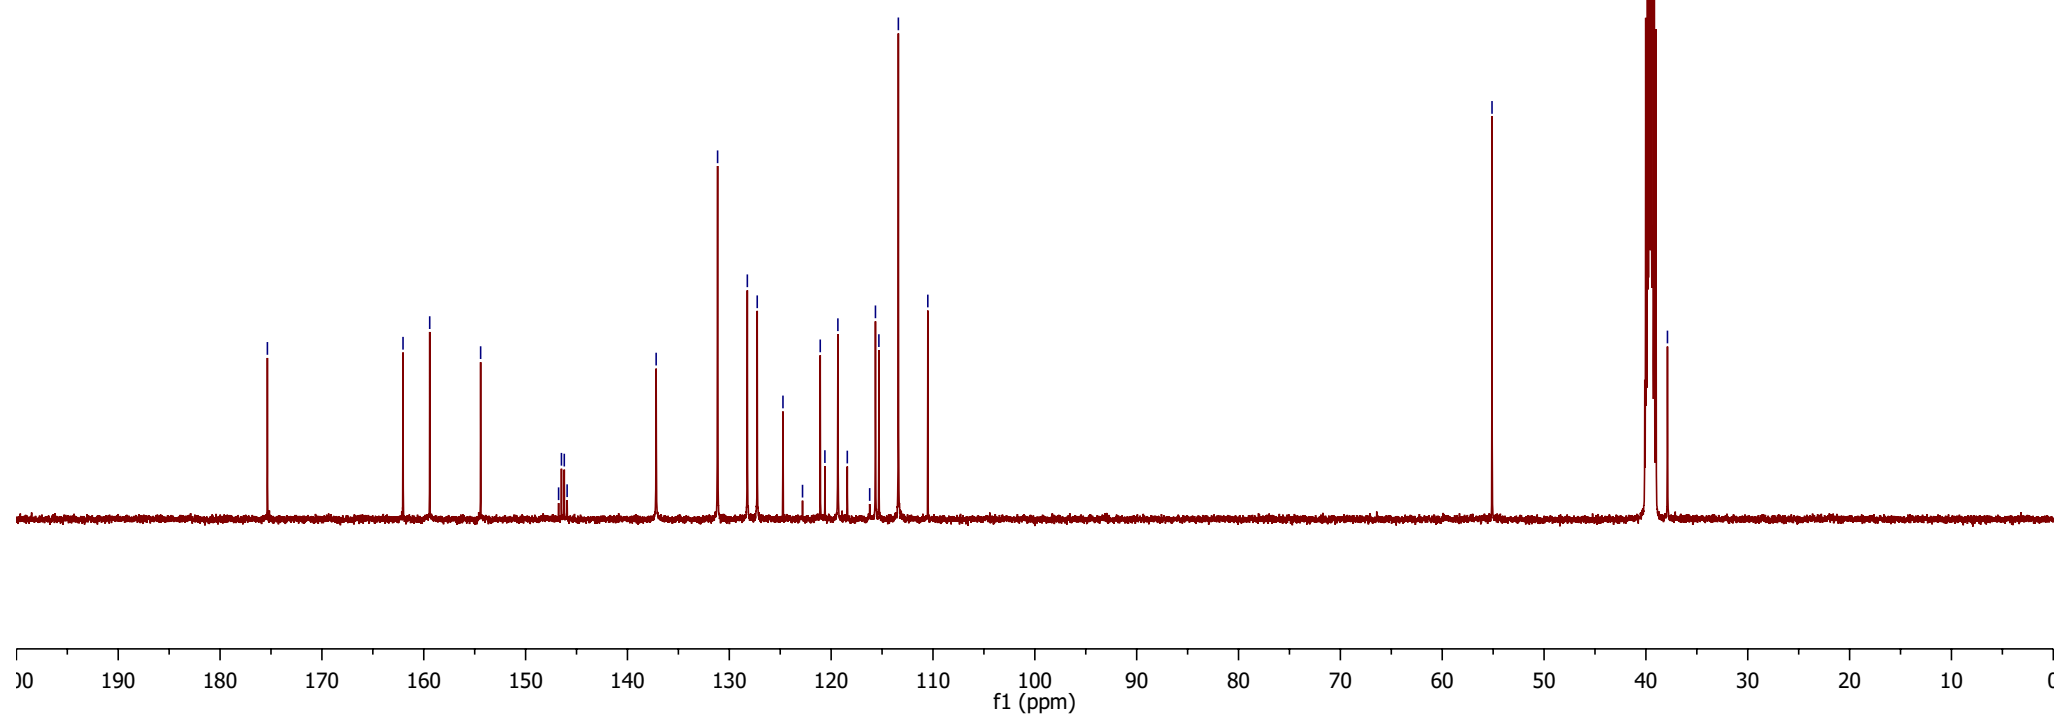



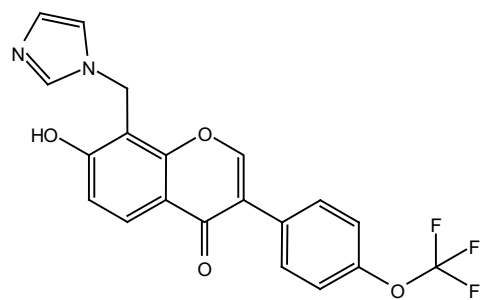

<sup>1</sup>H NMR spectrum of compound 9j in DMSO-d<sub>6</sub>

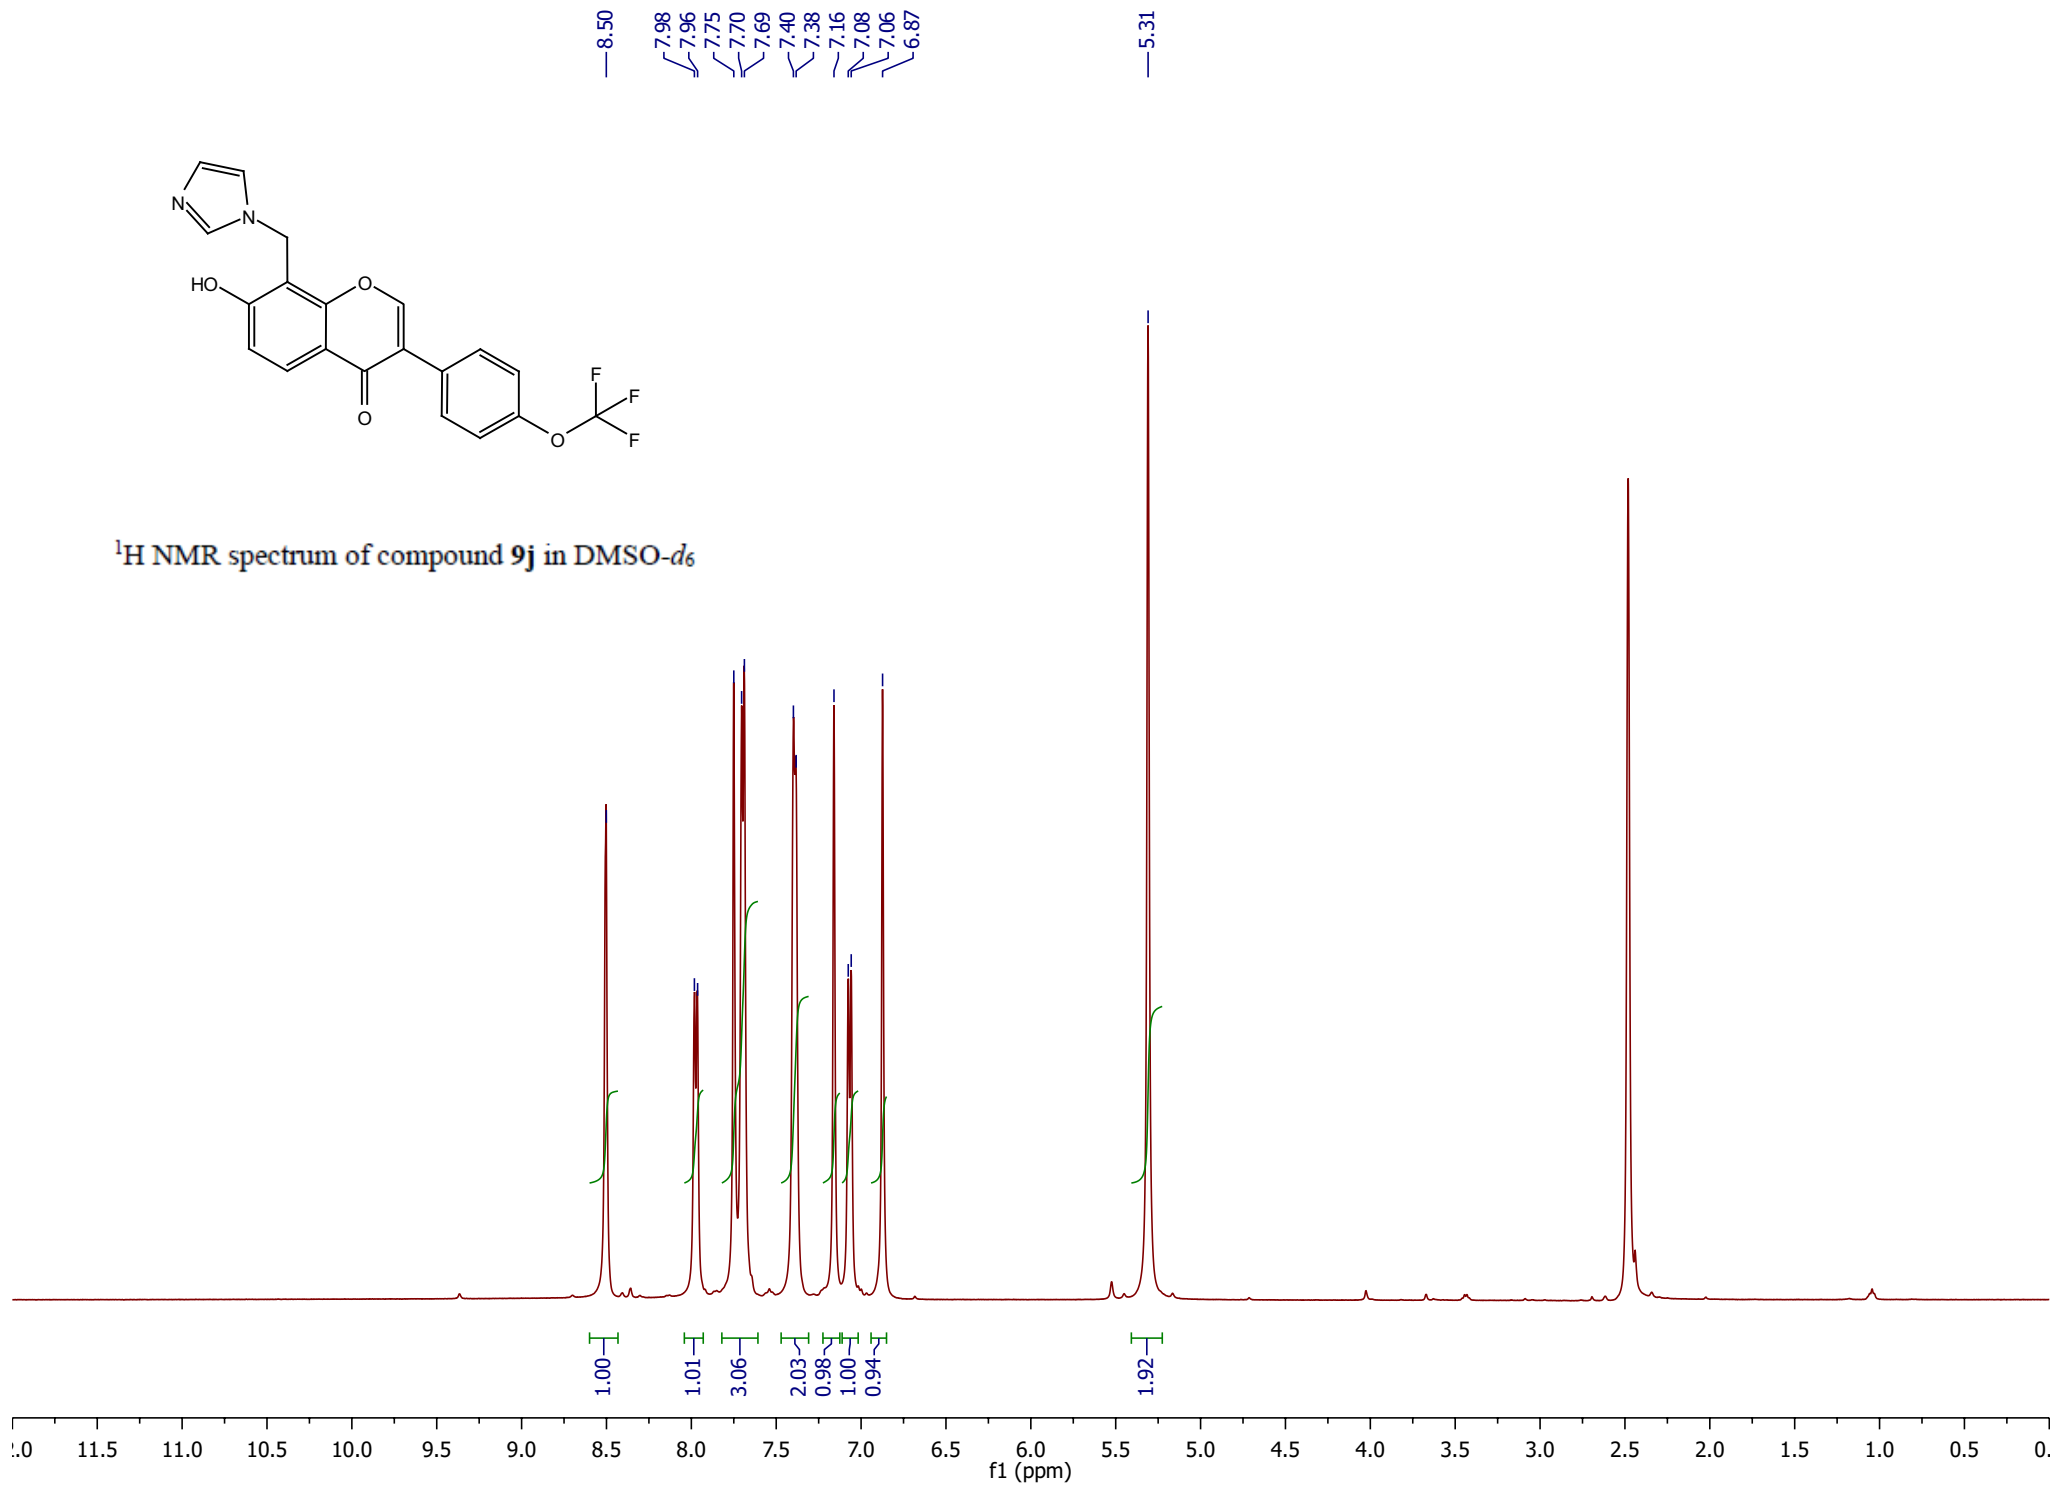

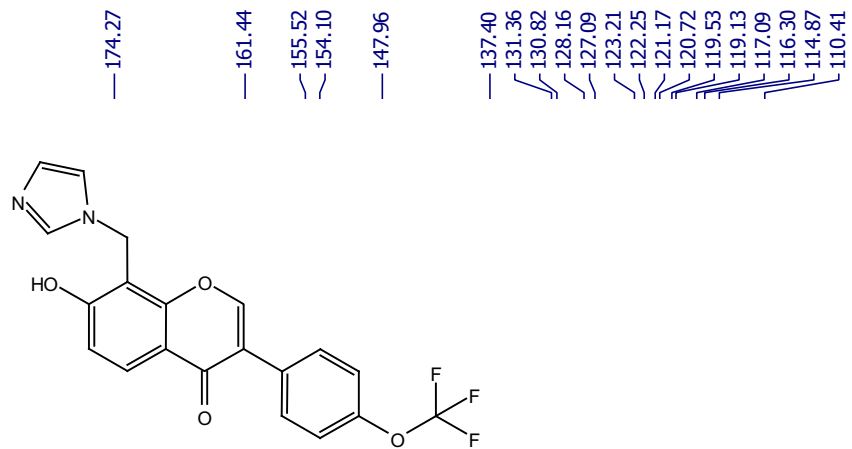

$^{13}\text{C}$  NMR spectrum of compound 9j in  $\text{DMSO-}d_6$

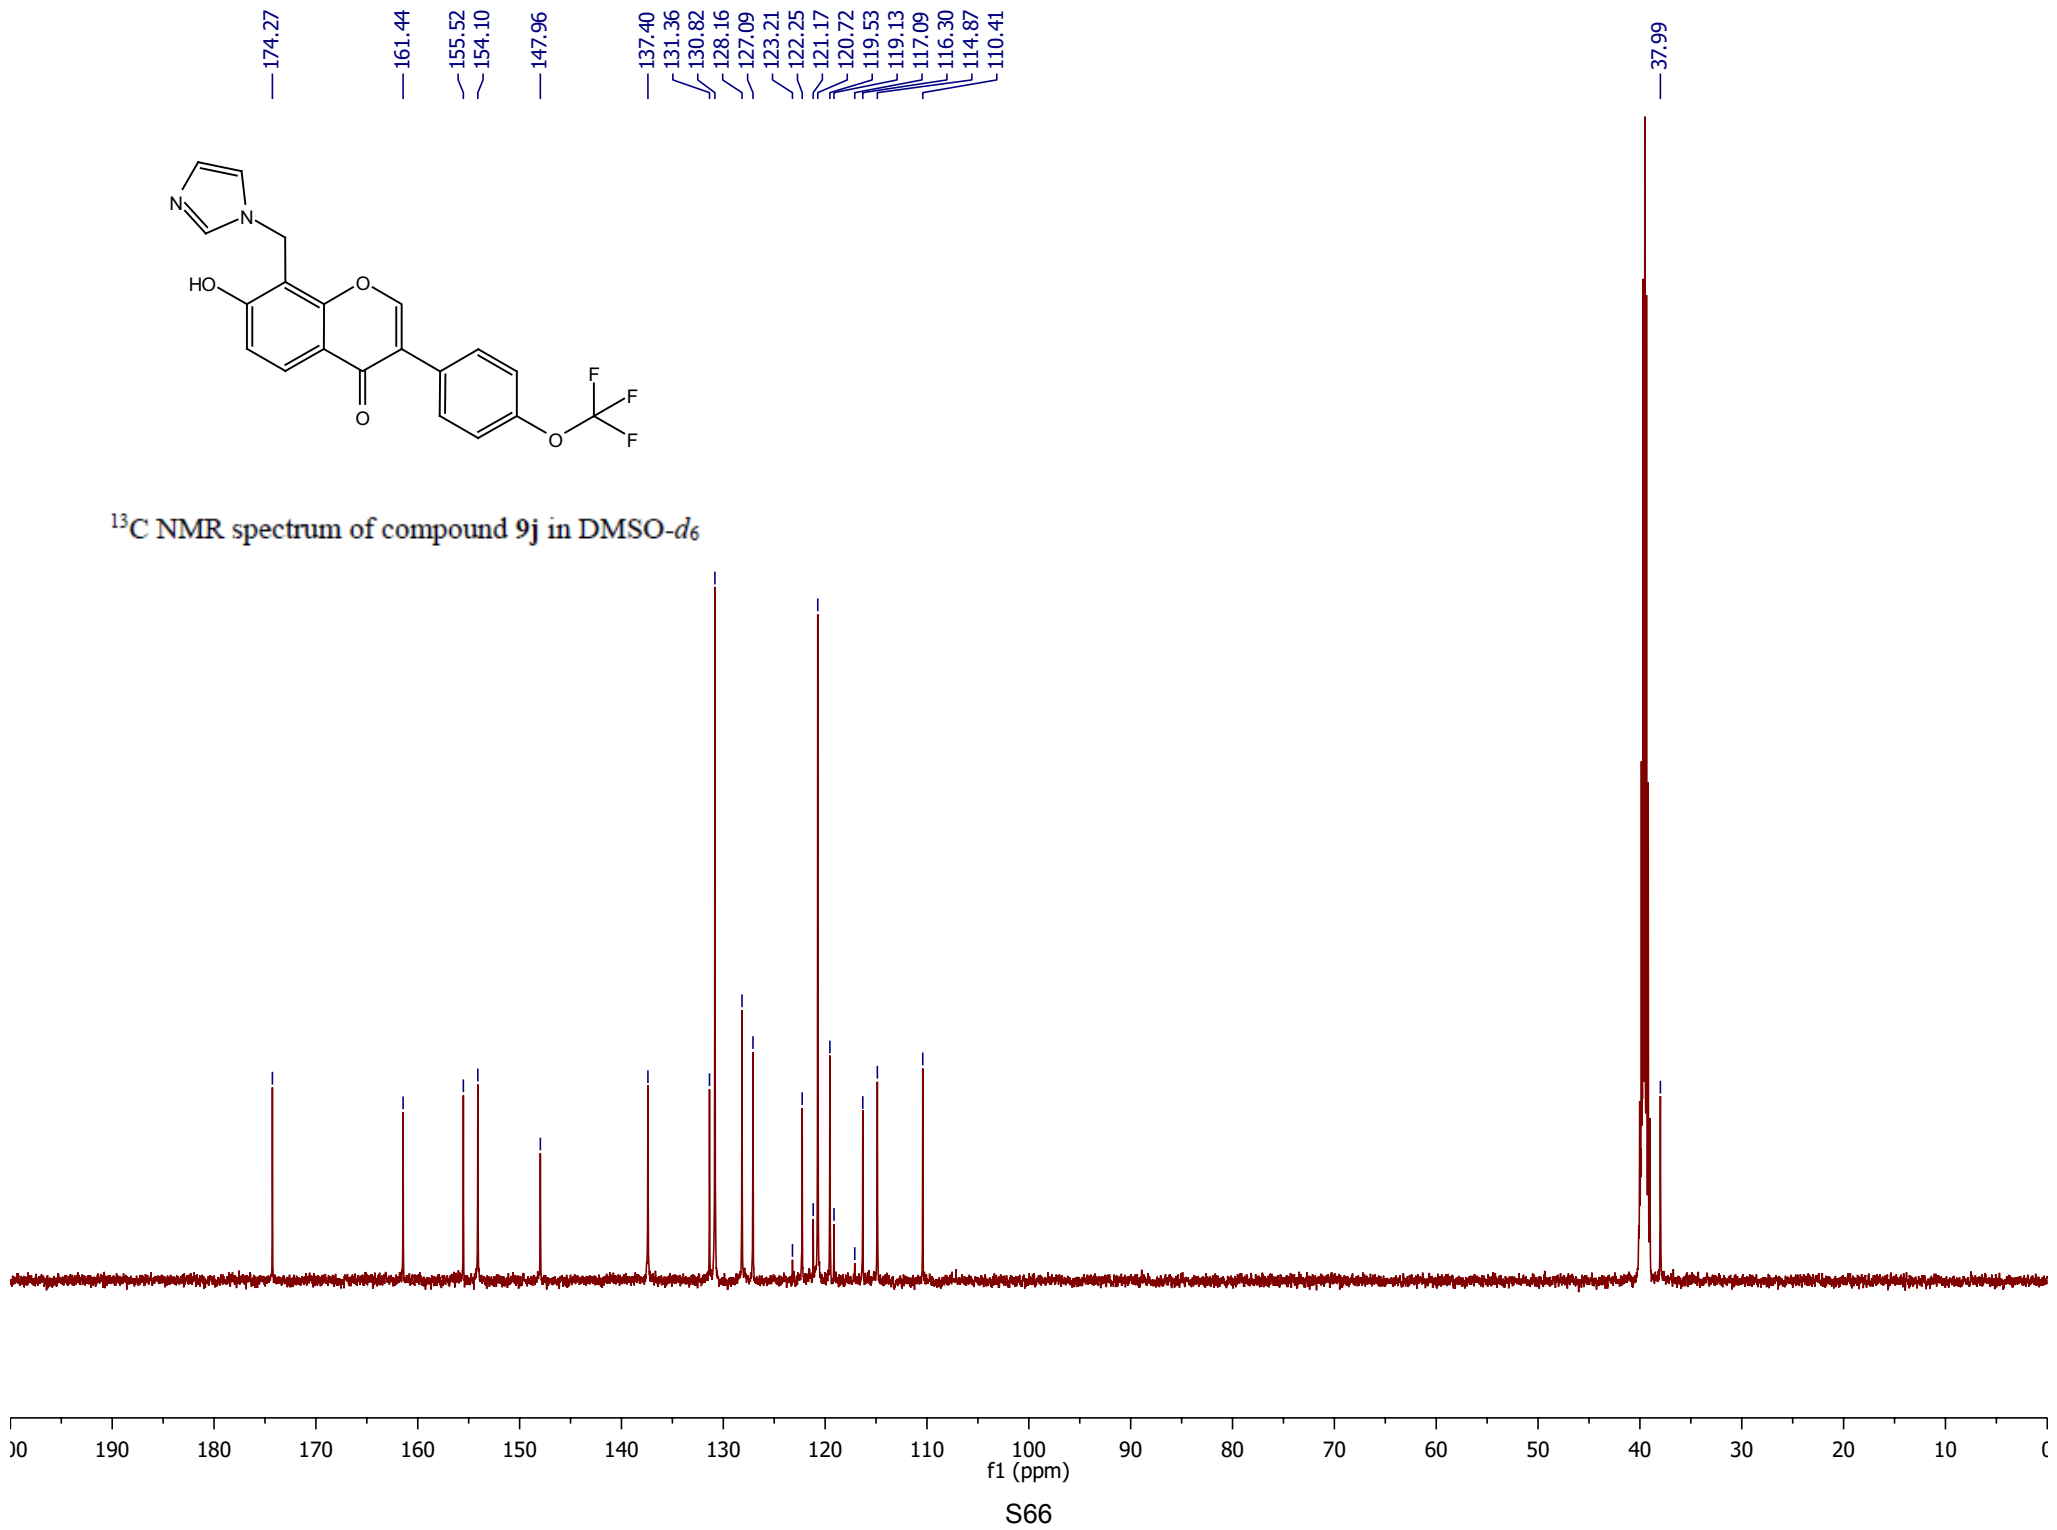

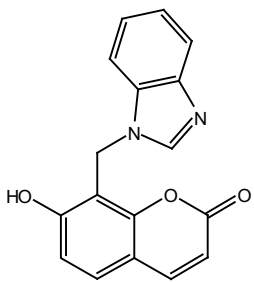

$^1\text{H}$  NMR spectrum of compound **10a** in  $\text{DMSO-}d_6$

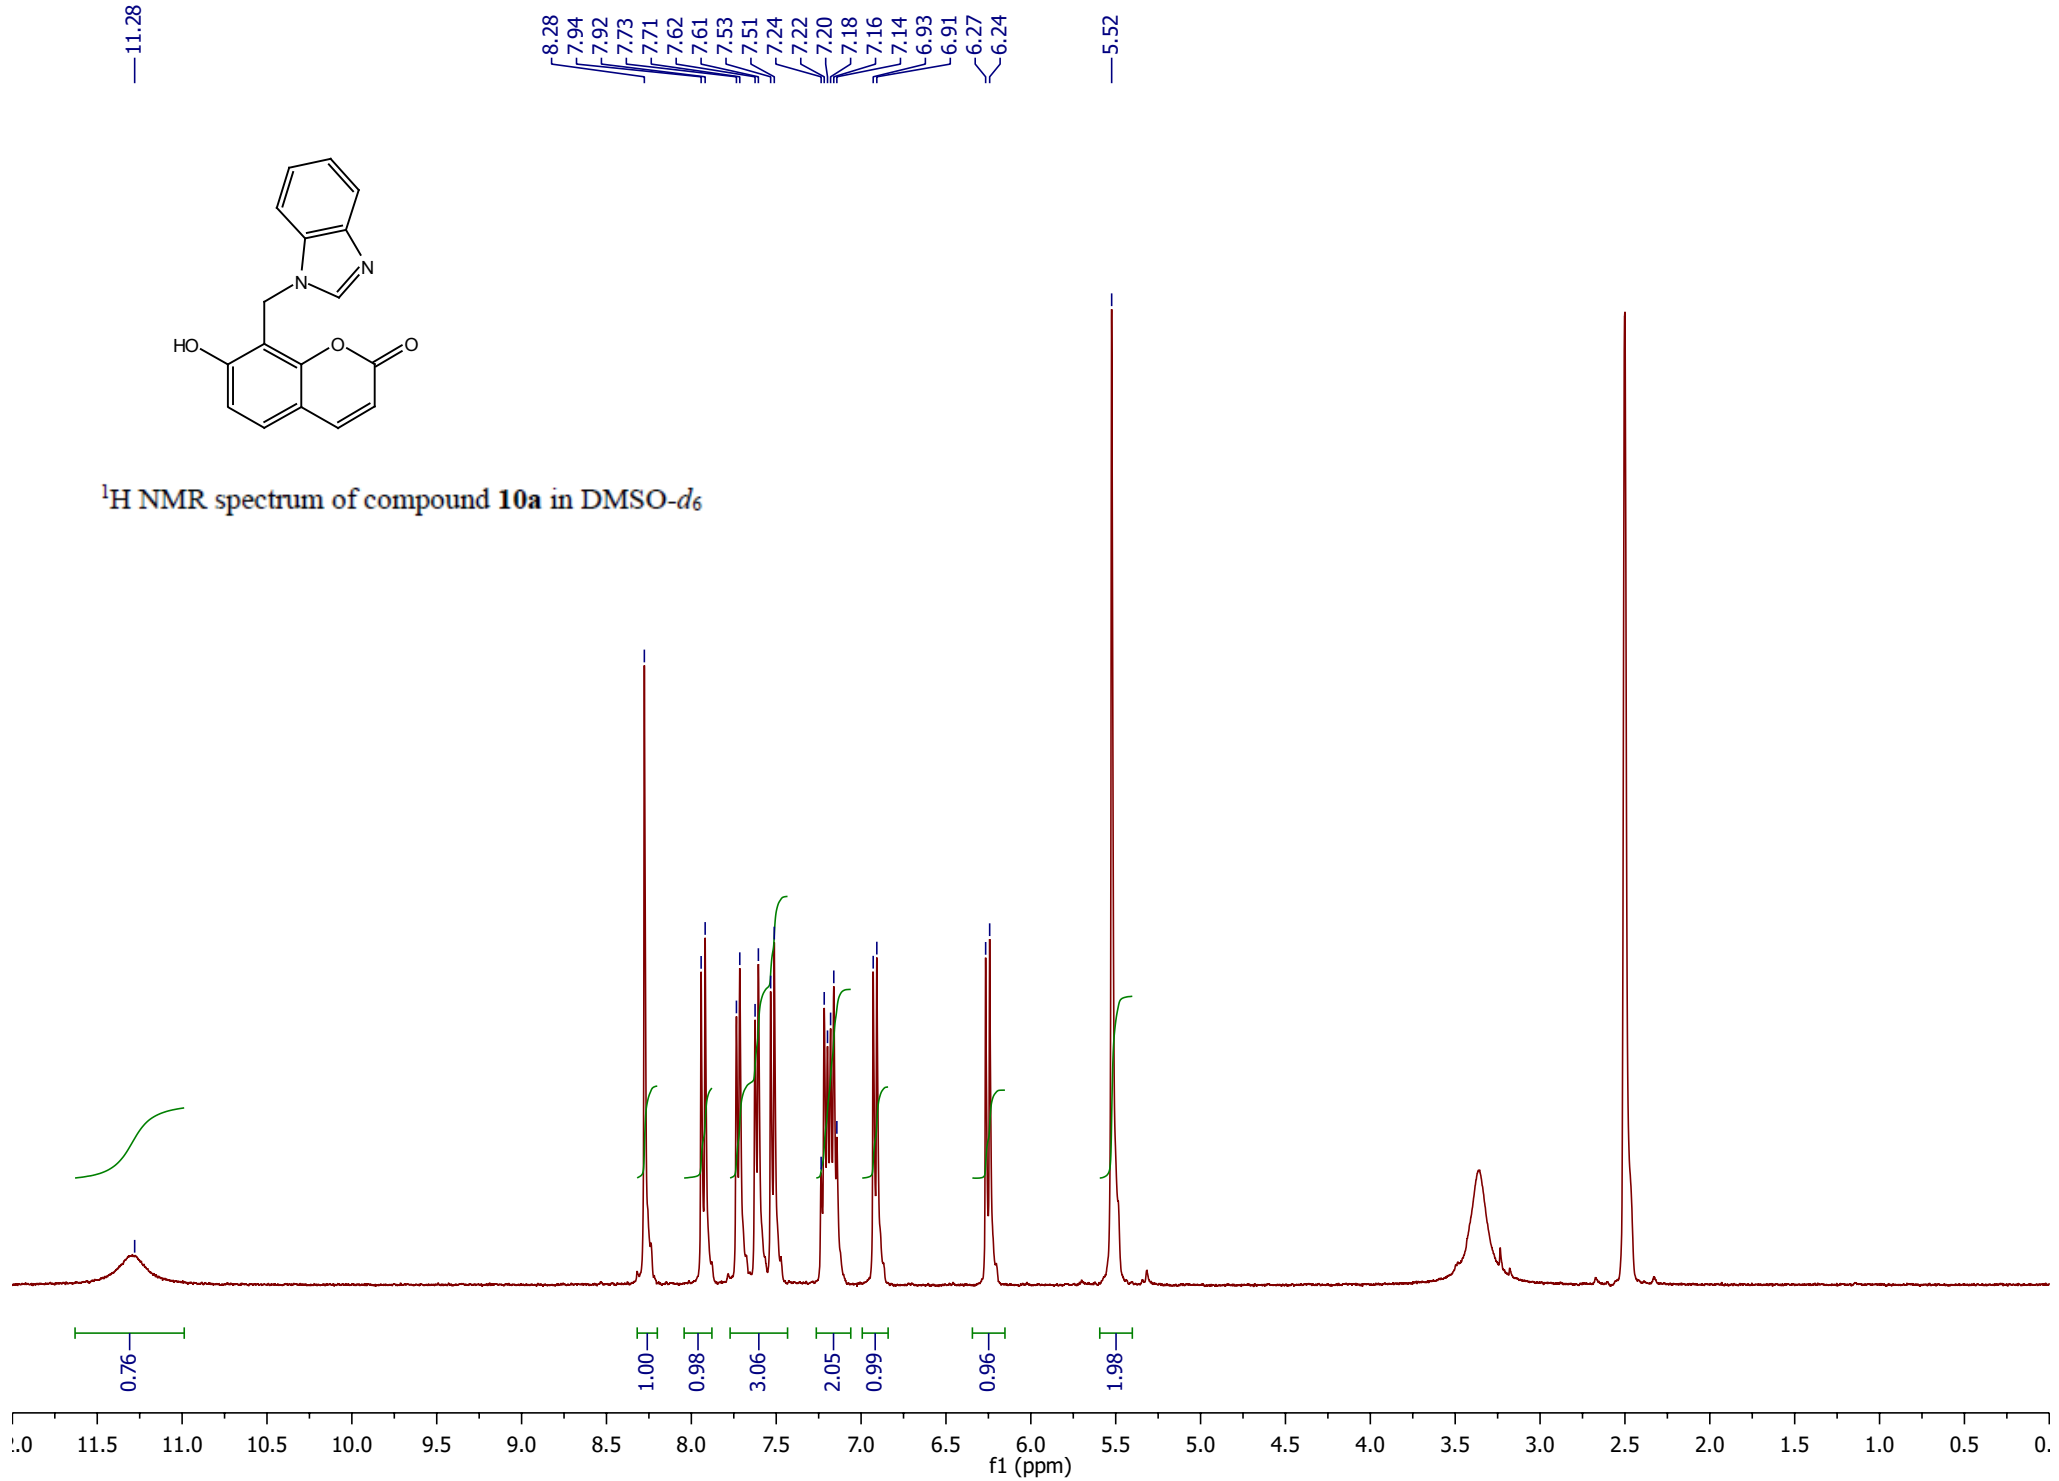

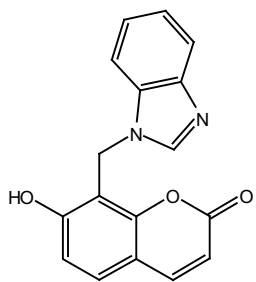

$^{13}\text{C}$  NMR spectrum of compound 10a in  $\text{DMSO-}d_6 + \text{CF}_3\text{SO}_3\text{H}$

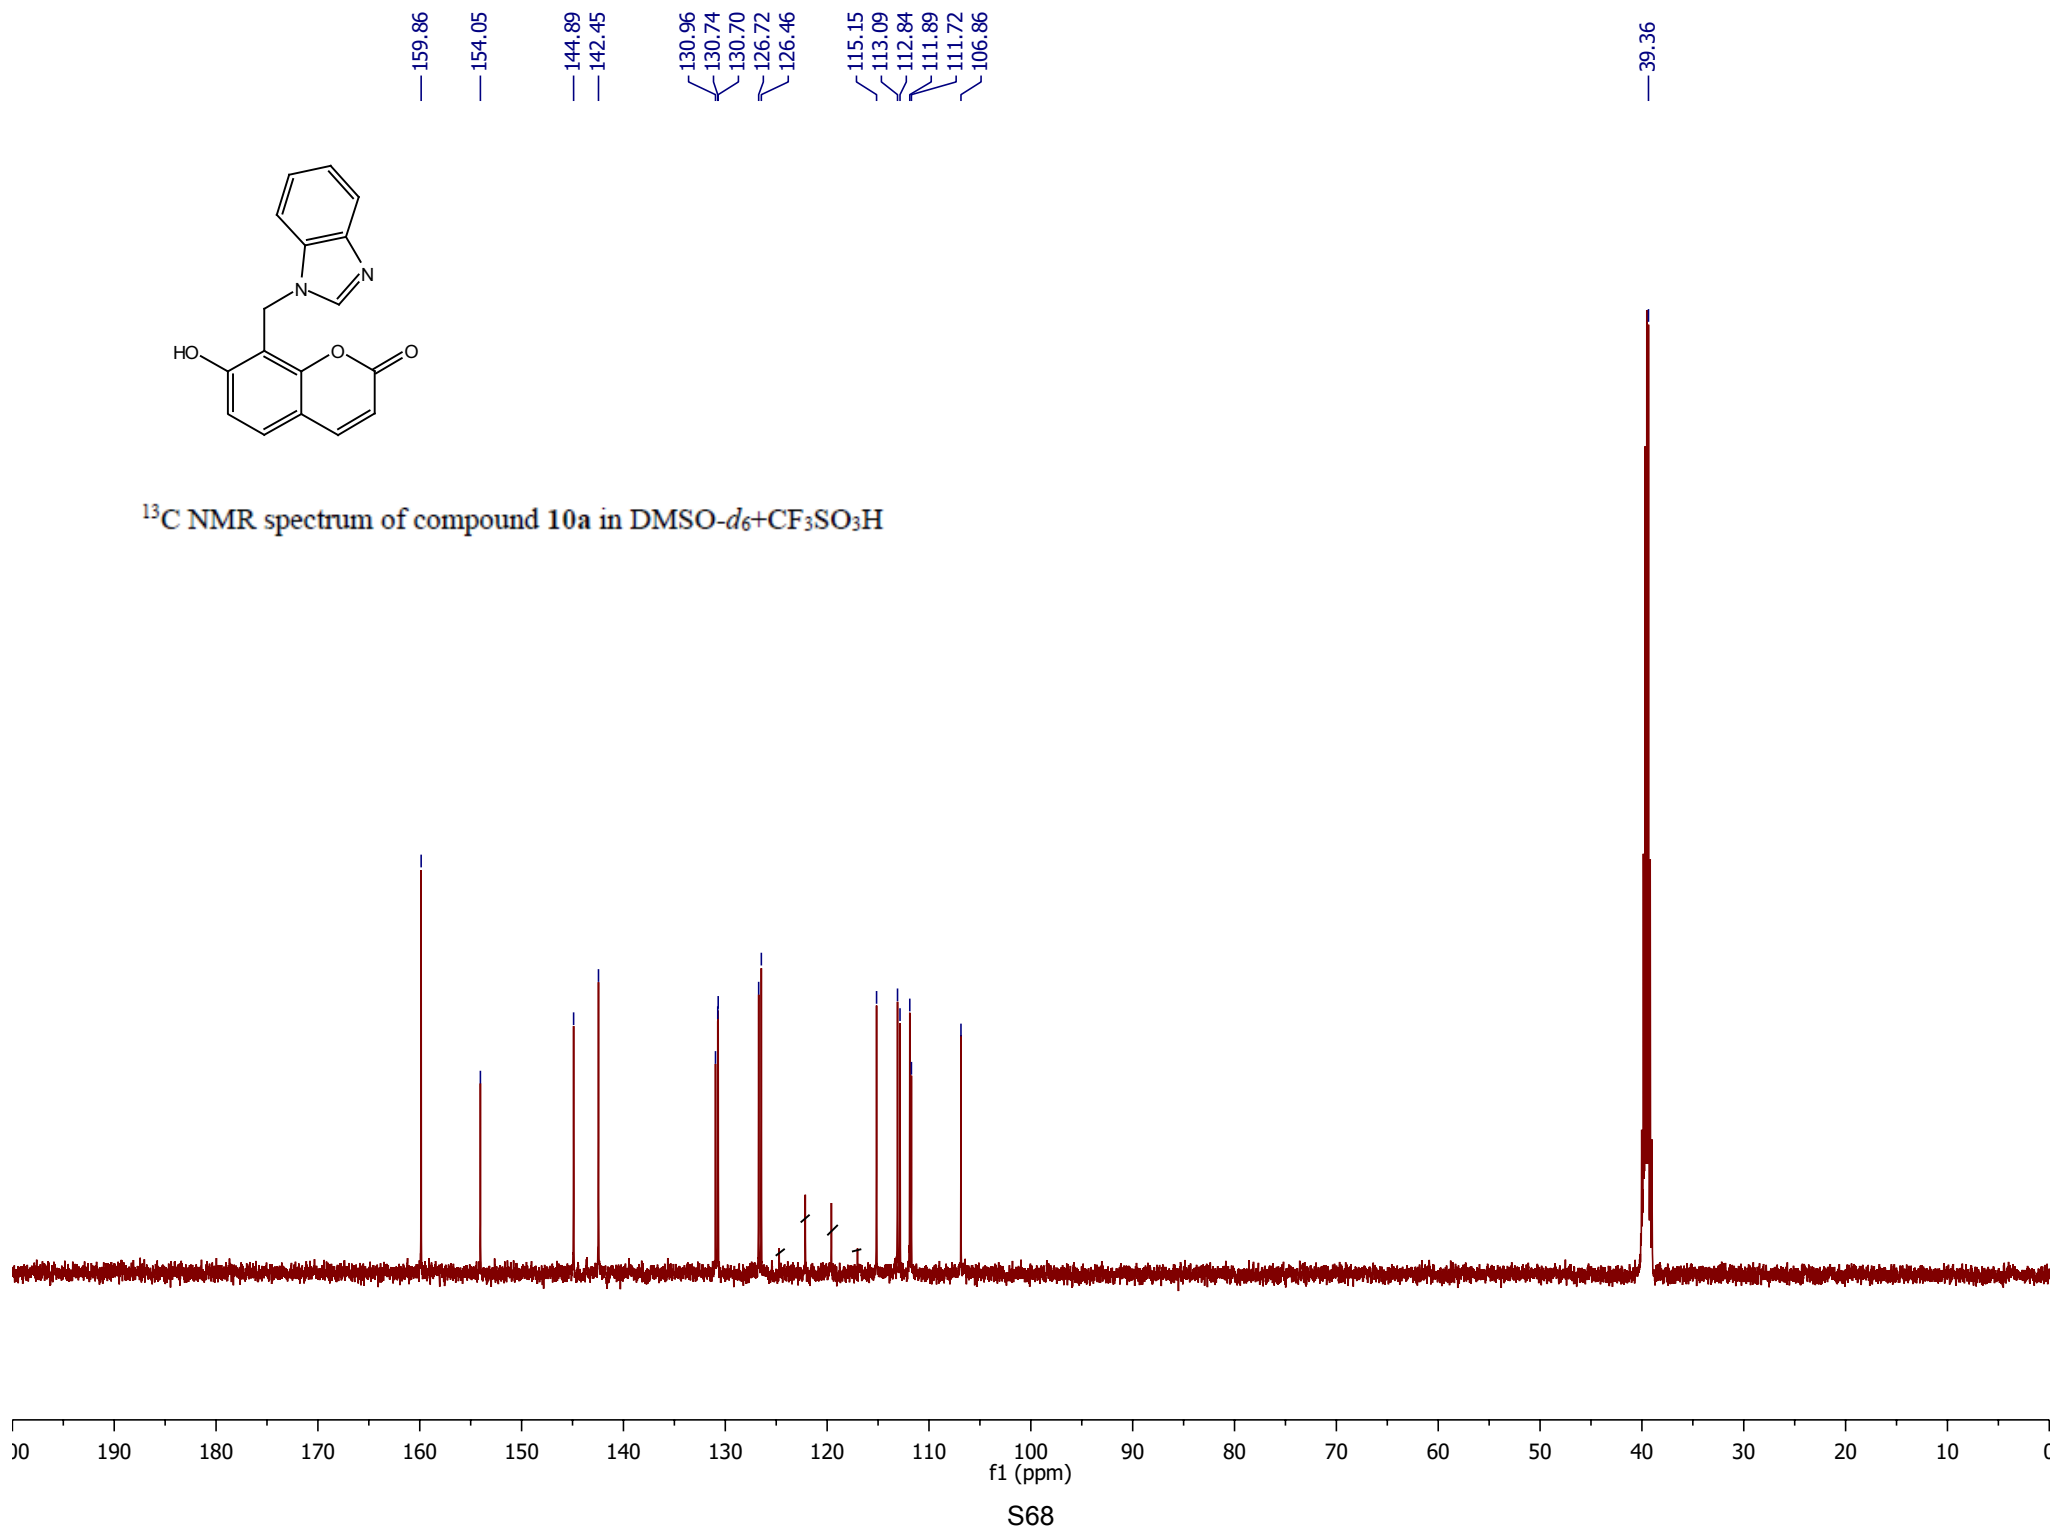

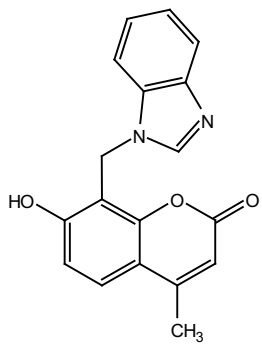

<sup>1</sup>H NMR spectrum of compound 10b in DMSO-d<sub>6</sub>

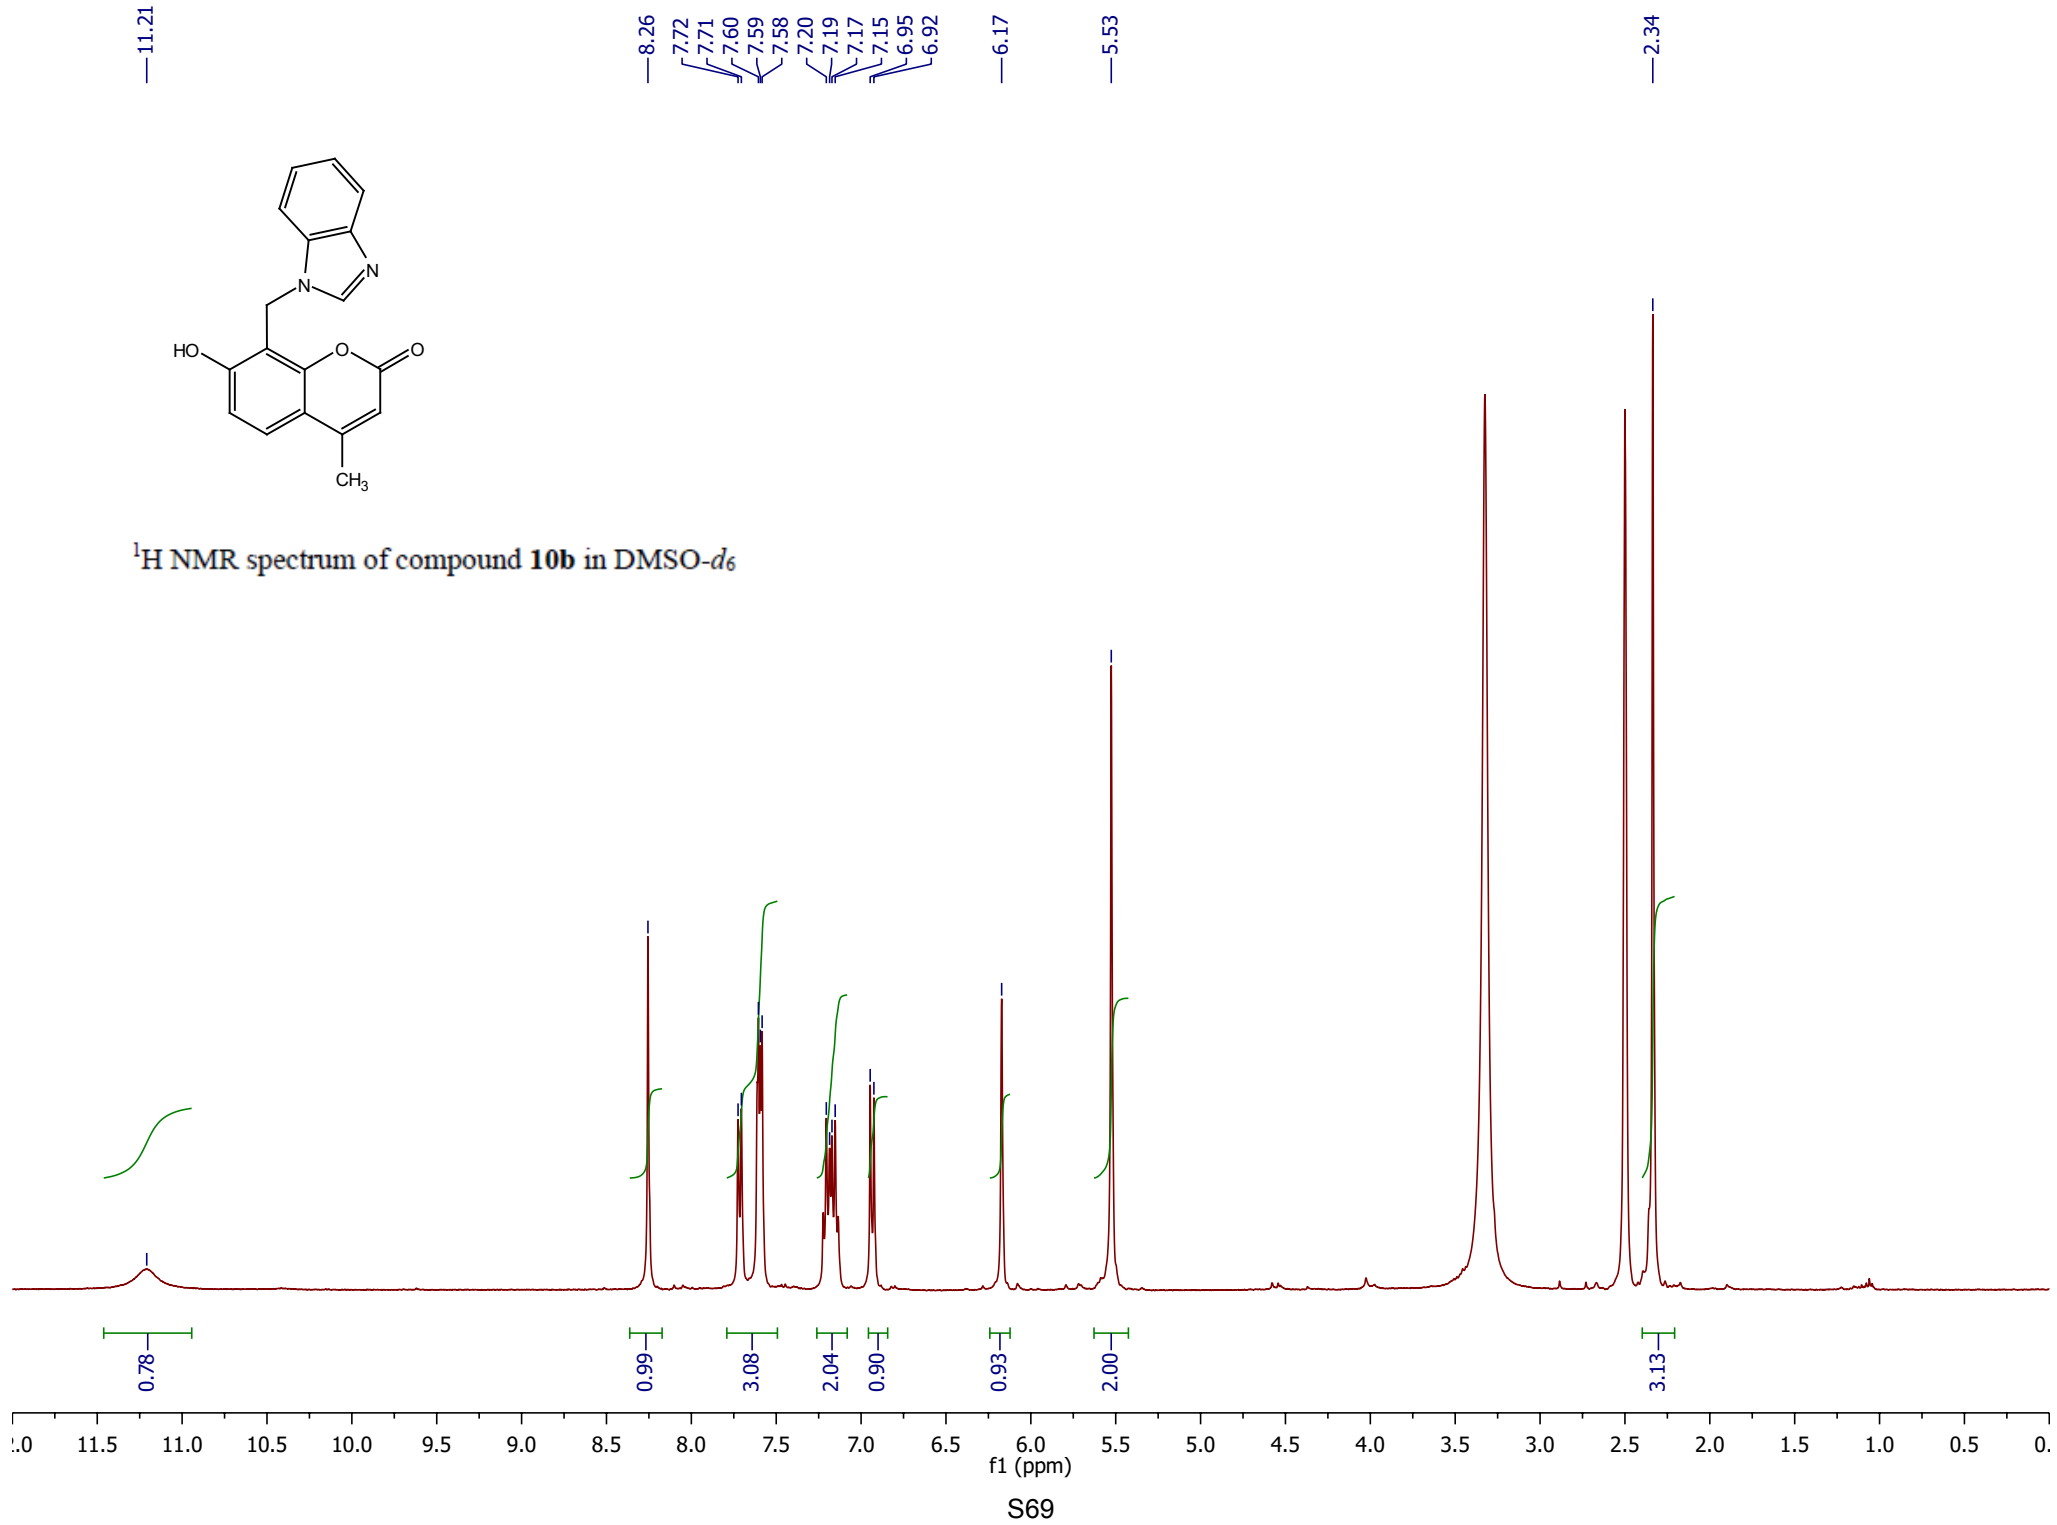

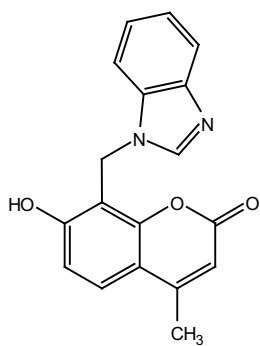

$^{13}\text{C}$  NMR spectrum of compound **10b** in  $\text{DMSO-}d_6$

159.65  
159.28  
153.88  
153.04  
144.71  
143.07  
133.62  
126.43  
122.33  
121.49  
119.35  
112.35  
112.13  
110.36  
110.19  
109.39

36.63

18.18

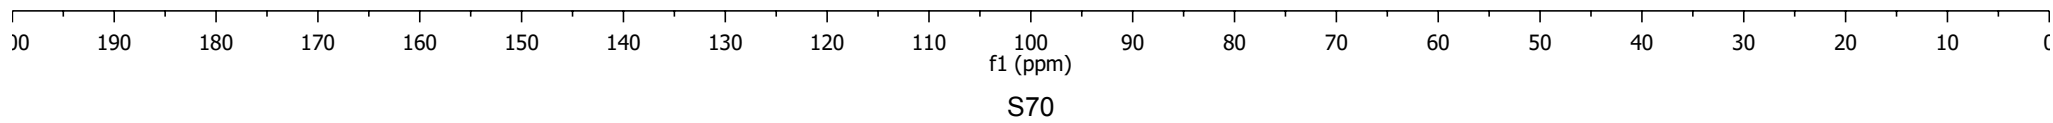

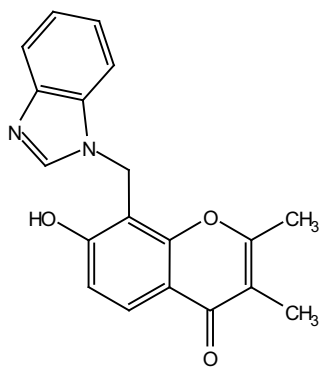

$^1\text{H}$  NMR spectrum of compound **10c** in  $\text{DMSO-}d_6$

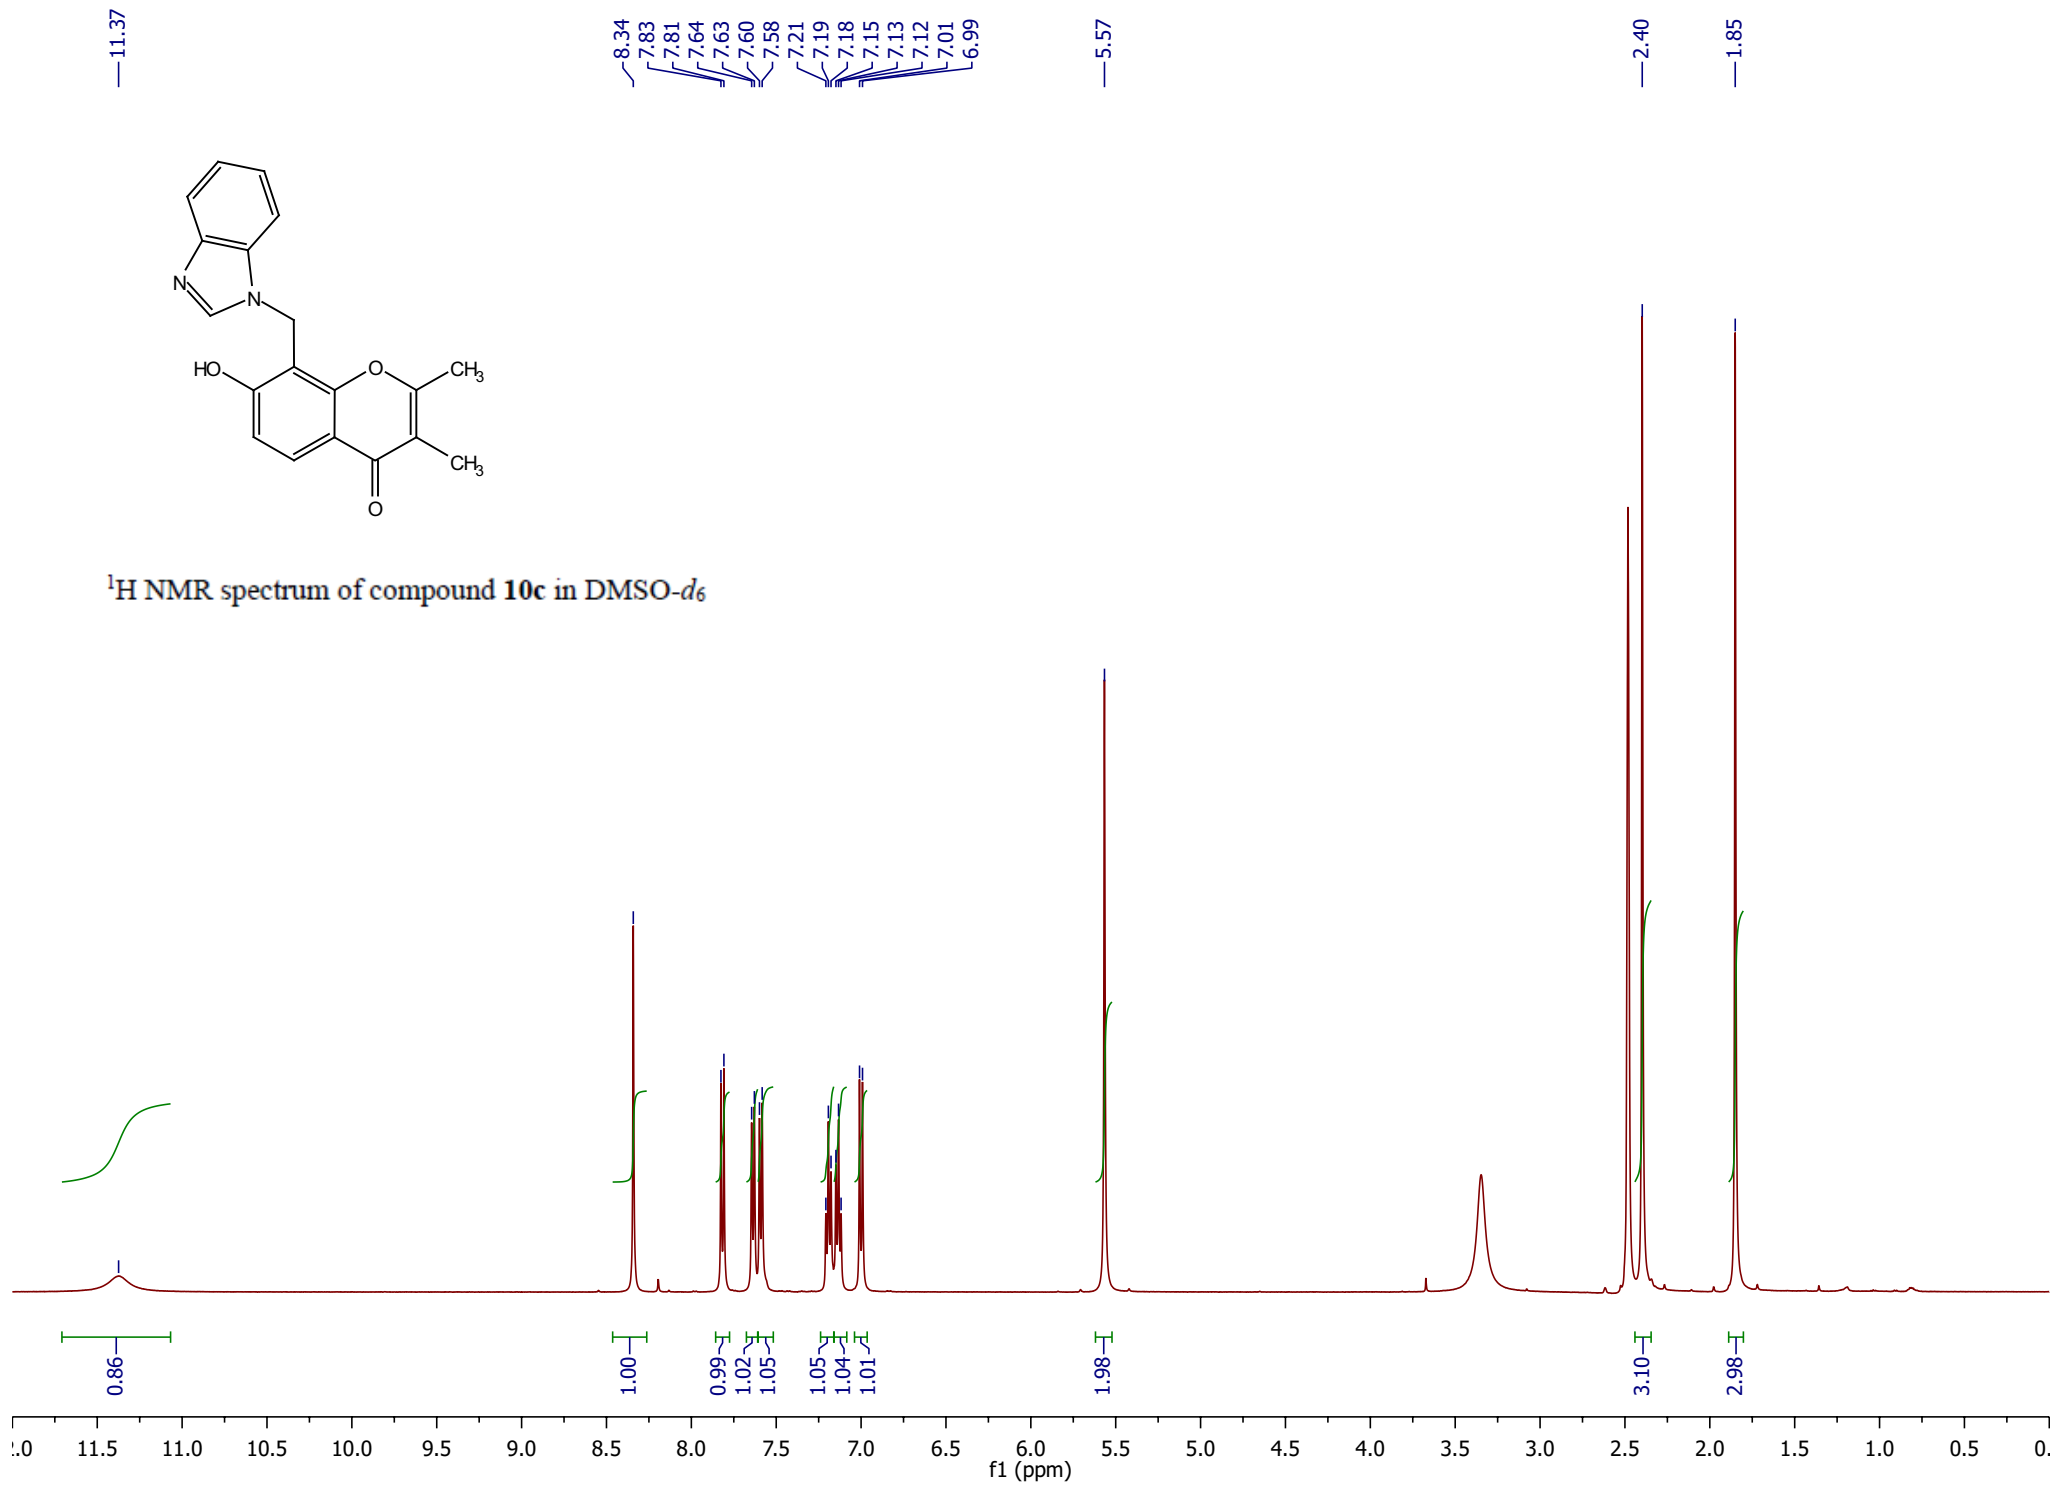



<sup>13</sup>C NMR spectrum of compound 10c in DMSO-*d*<sub>6</sub>

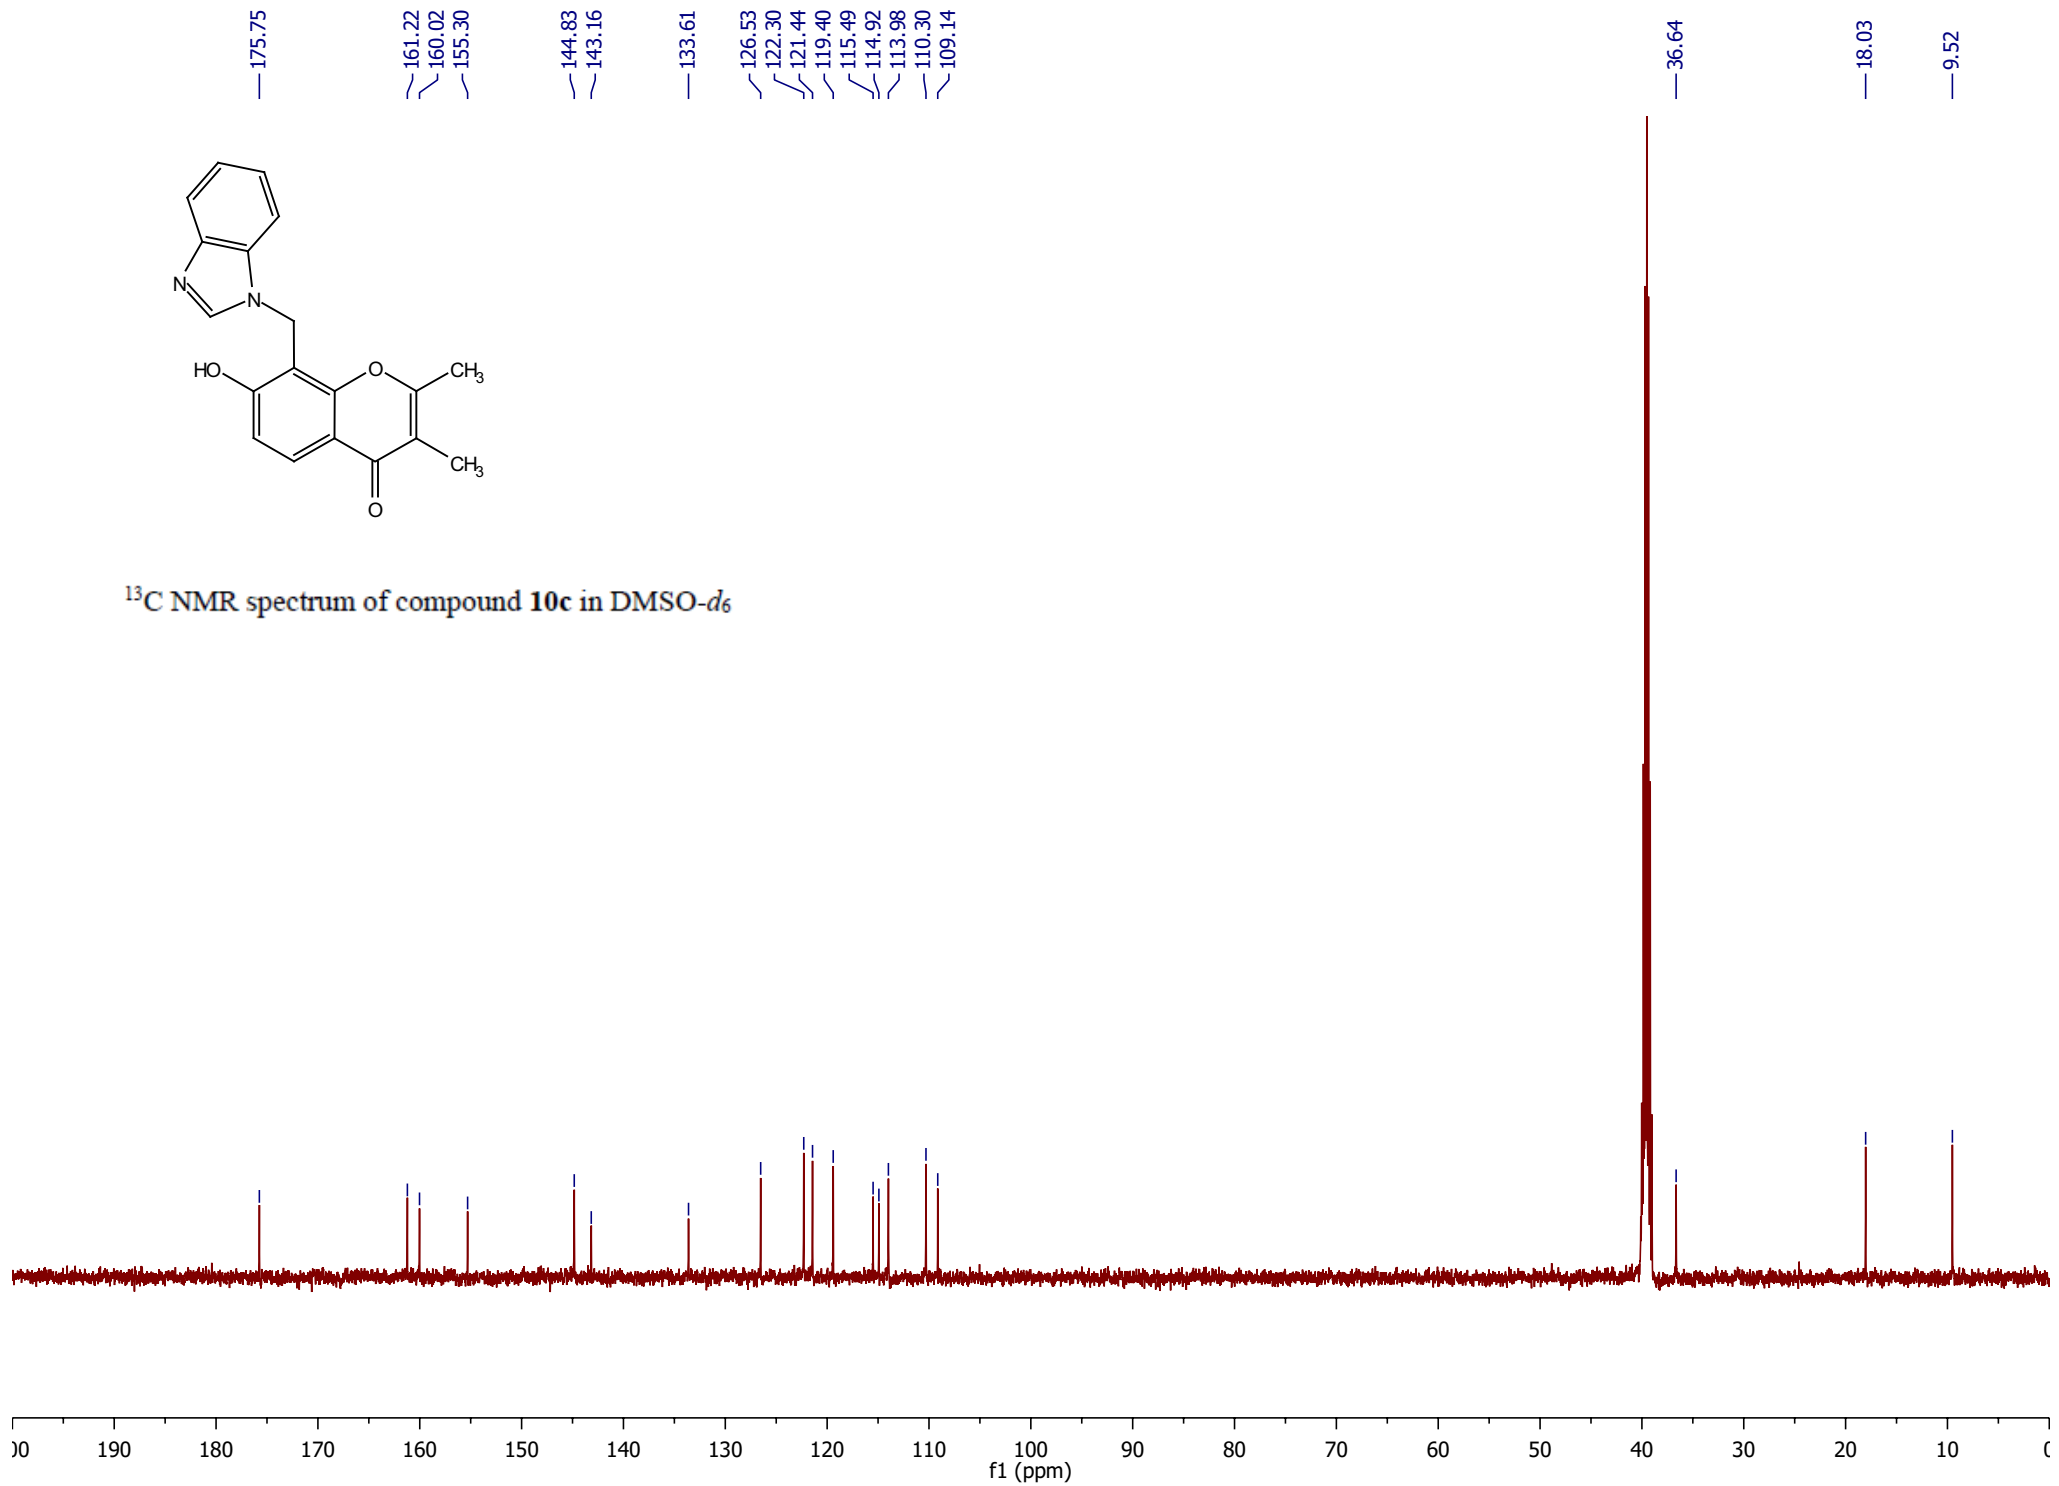



—11.52

—8.53  
—8.36  
7.99  
7.97  
7.74  
7.72  
7.63  
7.61  
7.52  
7.50  
7.26  
7.24  
7.22  
7.19  
7.17  
7.15  
7.09  
7.07  
7.00  
6.98  
5.59

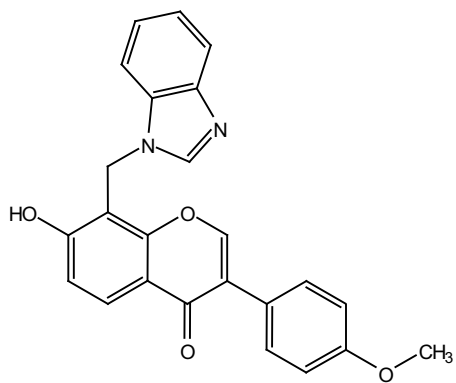

<sup>1</sup>H NMR spectrum of compound **10d** in DMSO-*d*<sub>6</sub>

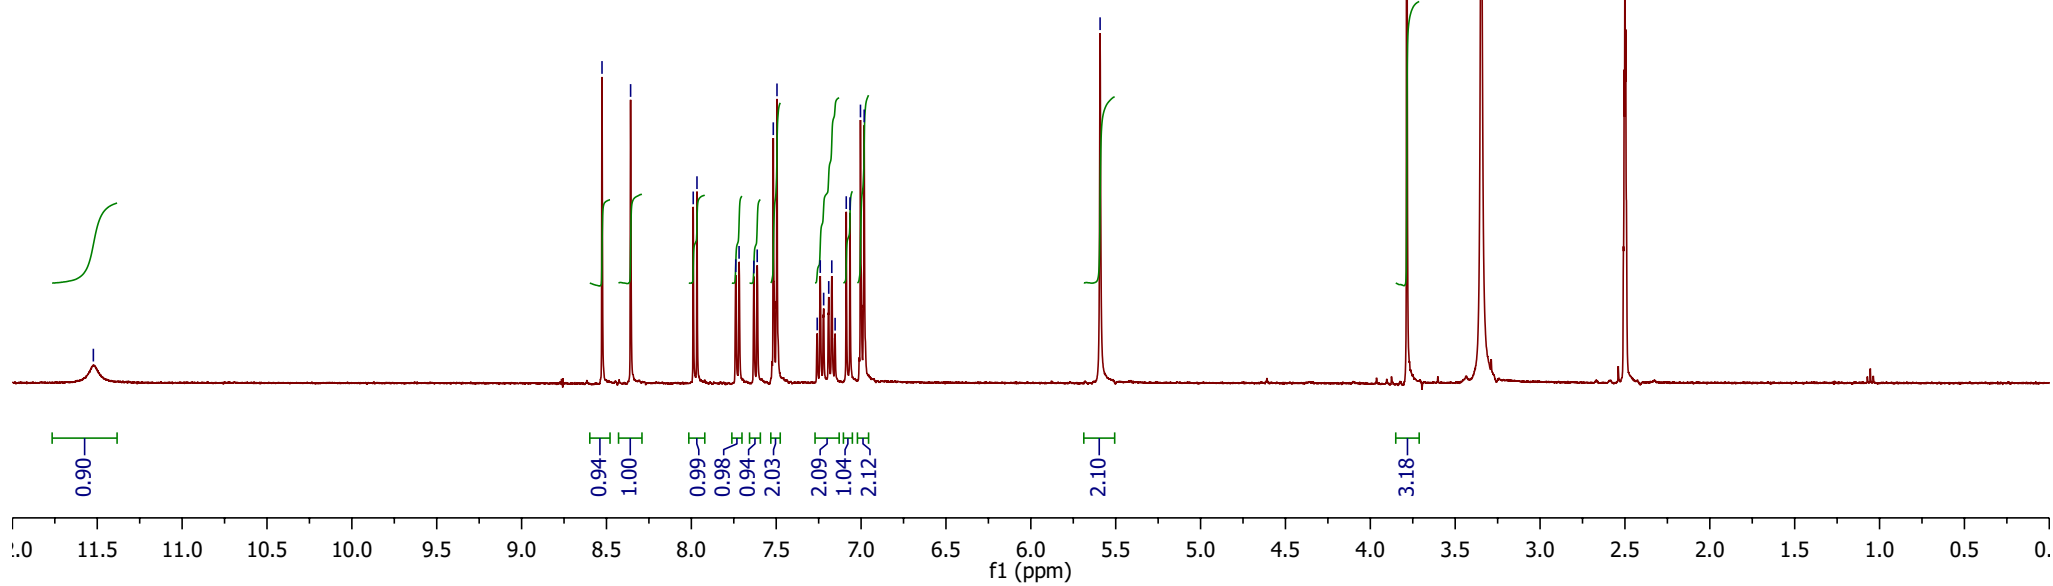

S73

174.66  
160.68  
159.06  
155.71  
153.01  
144.83  
143.17  
133.71  
130.10  
127.18  
123.98  
123.30  
122.49  
121.57  
119.42  
116.73  
114.62  
113.67  
110.45  
109.63  
55.17  
36.63

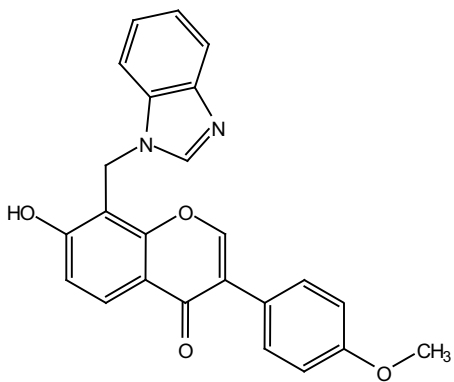

$^{13}\text{C}$  NMR spectrum of compound **10d** in  $\text{DMSO-}d_6$

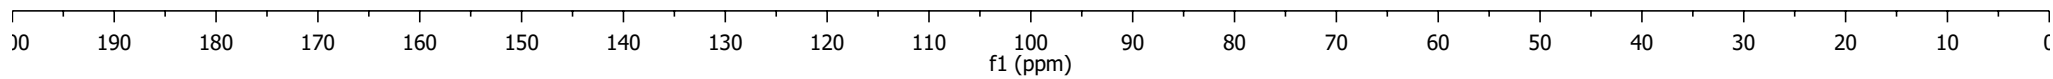

11.56

8.56  
8.36  
7.99  
7.97  
7.73  
7.71  
7.63  
7.62  
7.26  
7.24  
7.22  
7.19  
7.18  
7.18  
7.16  
7.14  
7.12  
7.12  
7.09  
7.07  
7.01  
6.99  
5.59

3.78  
3.78

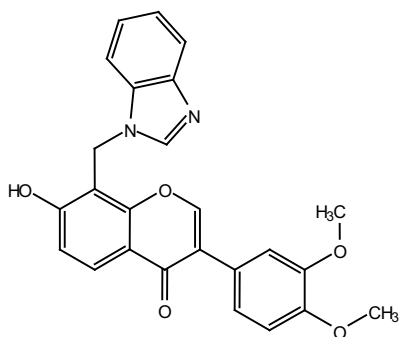

<sup>1</sup>H NMR spectrum of compound 10e in DMSO-d<sub>6</sub>

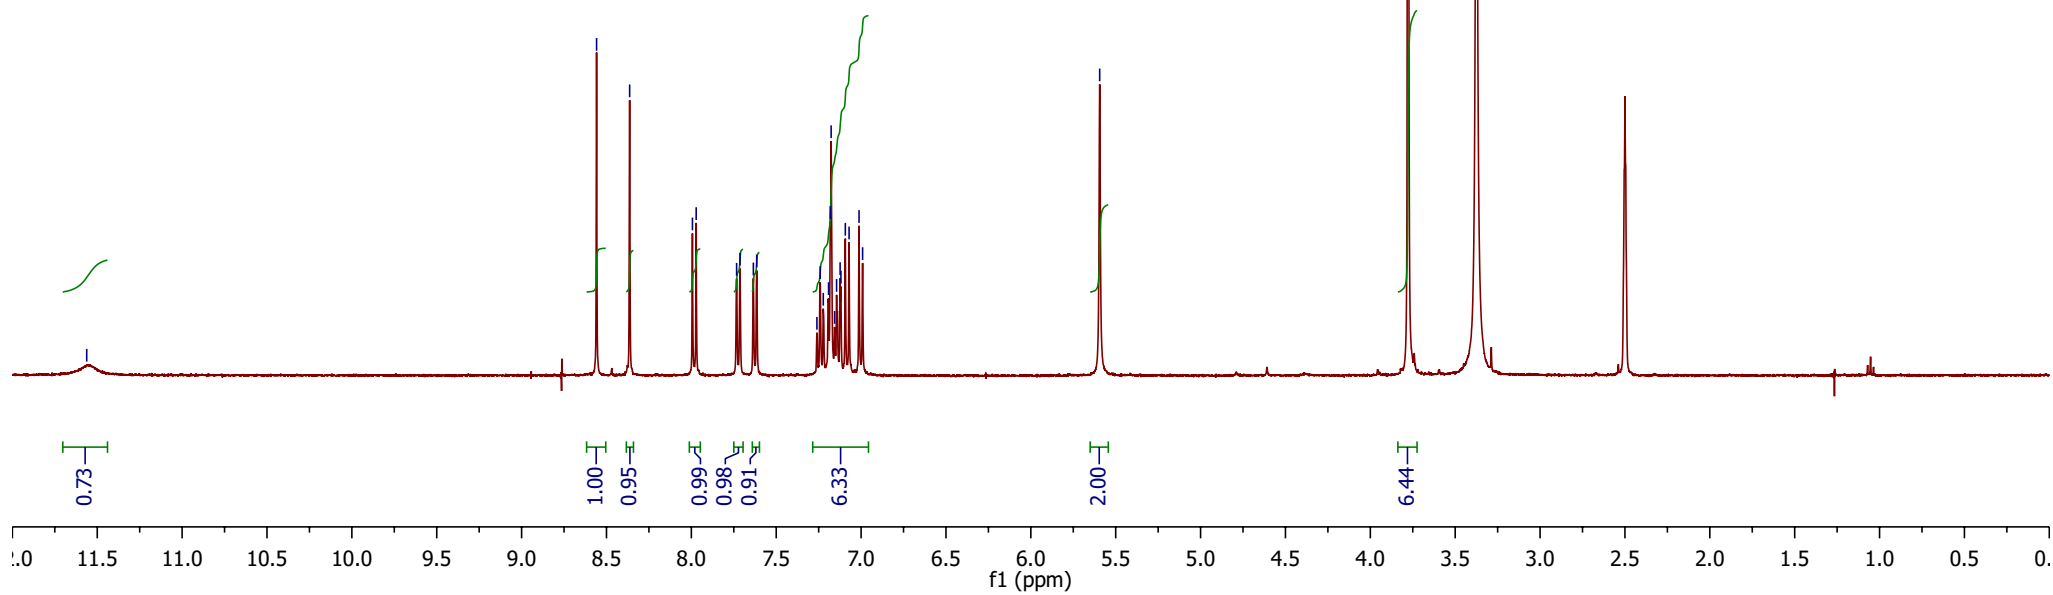

S75



$^{13}\text{C}$  NMR spectrum of compound **10e** in  $\text{DMSO-}d_6$

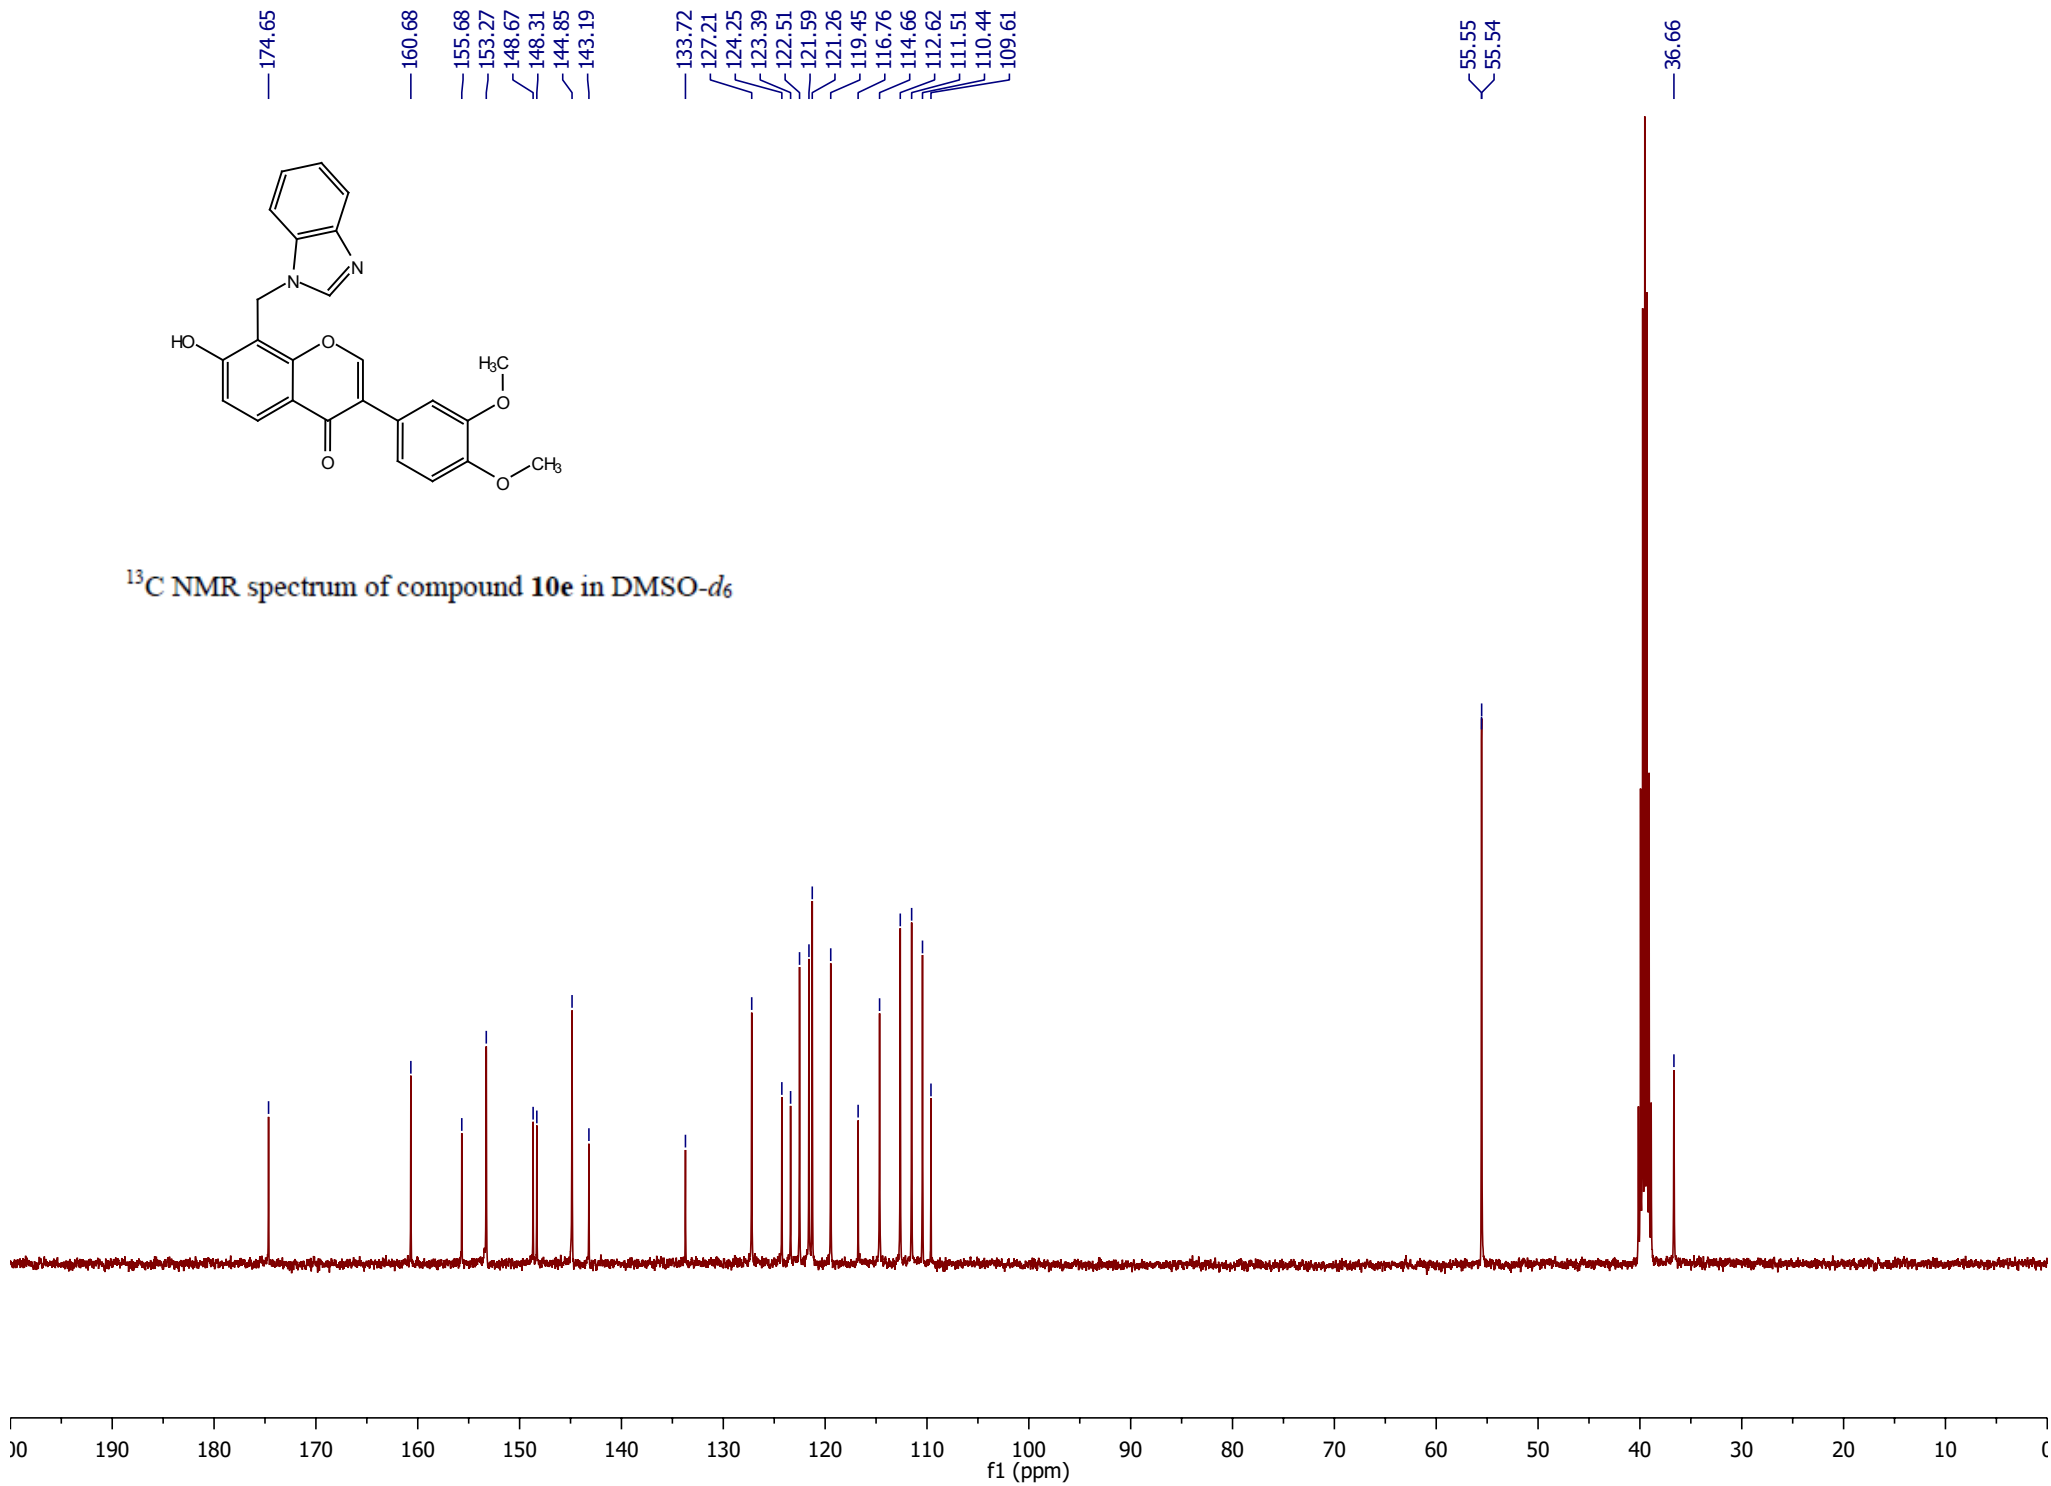

—11.46

—8.39  
7.88  
7.86  
7.72  
7.70  
7.64  
7.62  
7.26  
7.24  
7.22  
7.19  
7.18  
7.16  
7.07  
7.05  
6.97

—5.63

—3.78

—2.31

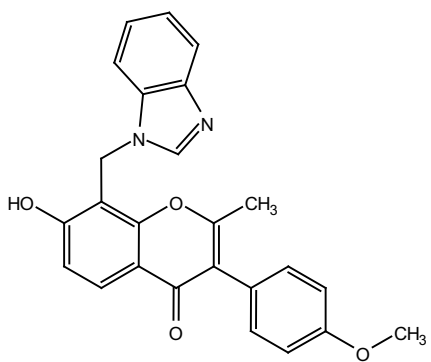

<sup>1</sup>H NMR spectrum of compound **10f** in DMSO-*d*<sub>6</sub>

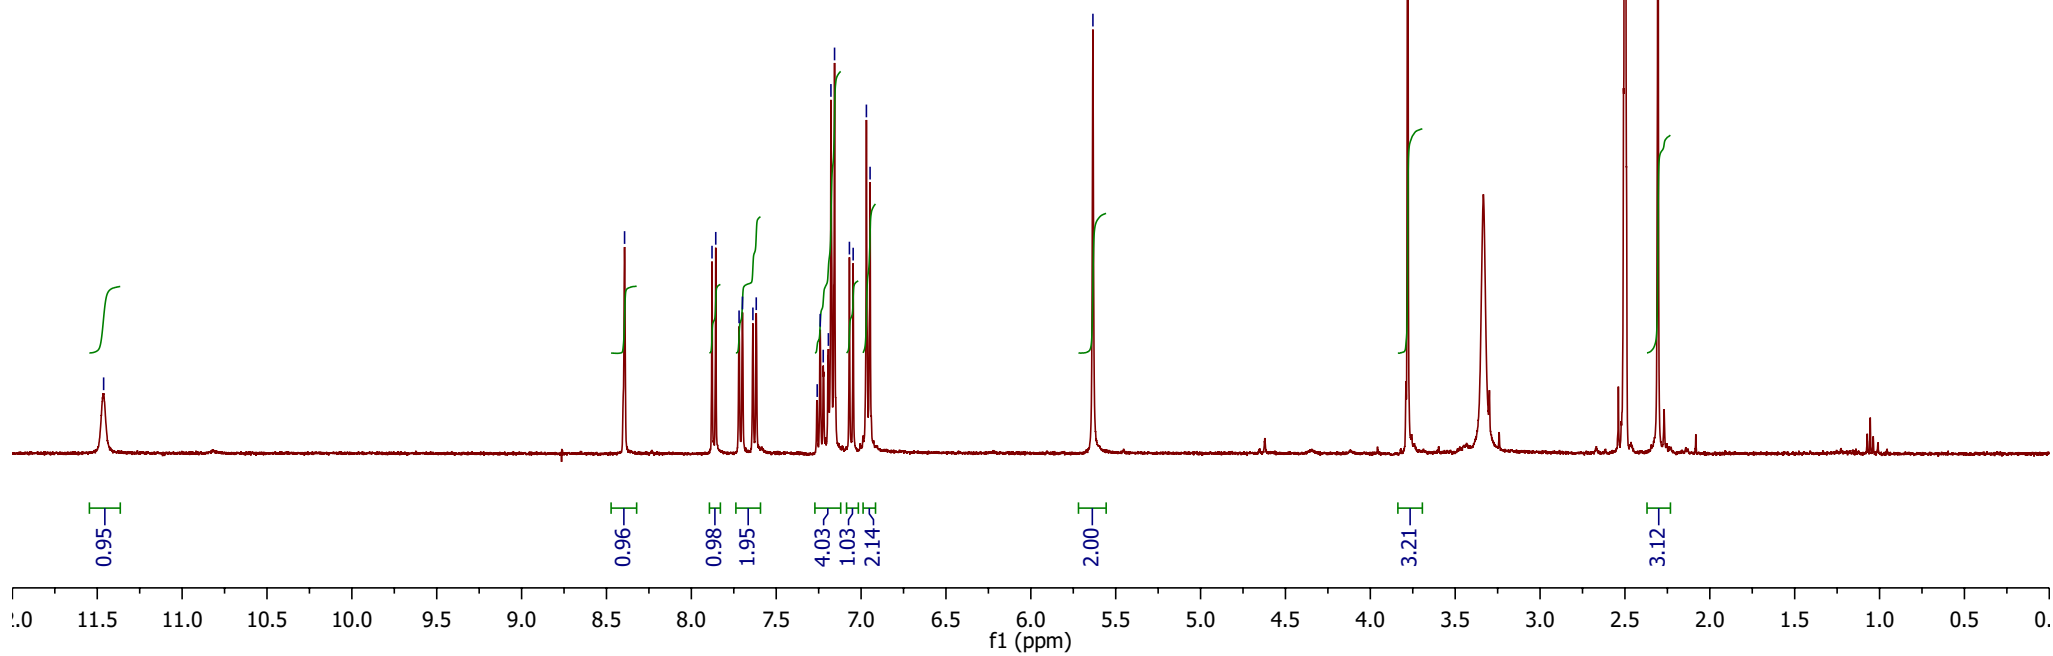

174.90  
162.28  
160.28  
158.56  
155.35  
144.78  
143.15  
133.65  
131.61  
126.86  
124.95  
122.35  
121.83  
121.48  
119.41  
115.71  
114.18  
113.47  
110.34  
109.34

55.05

36.64

19.04

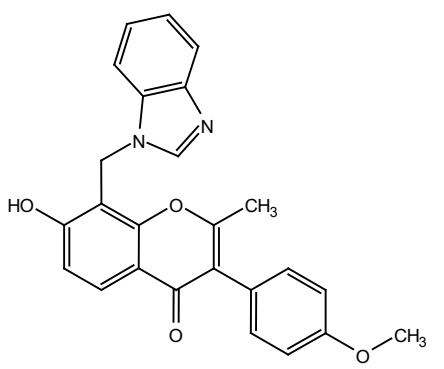

<sup>13</sup>C NMR spectrum of compound 10f in DMSO-d<sub>6</sub>

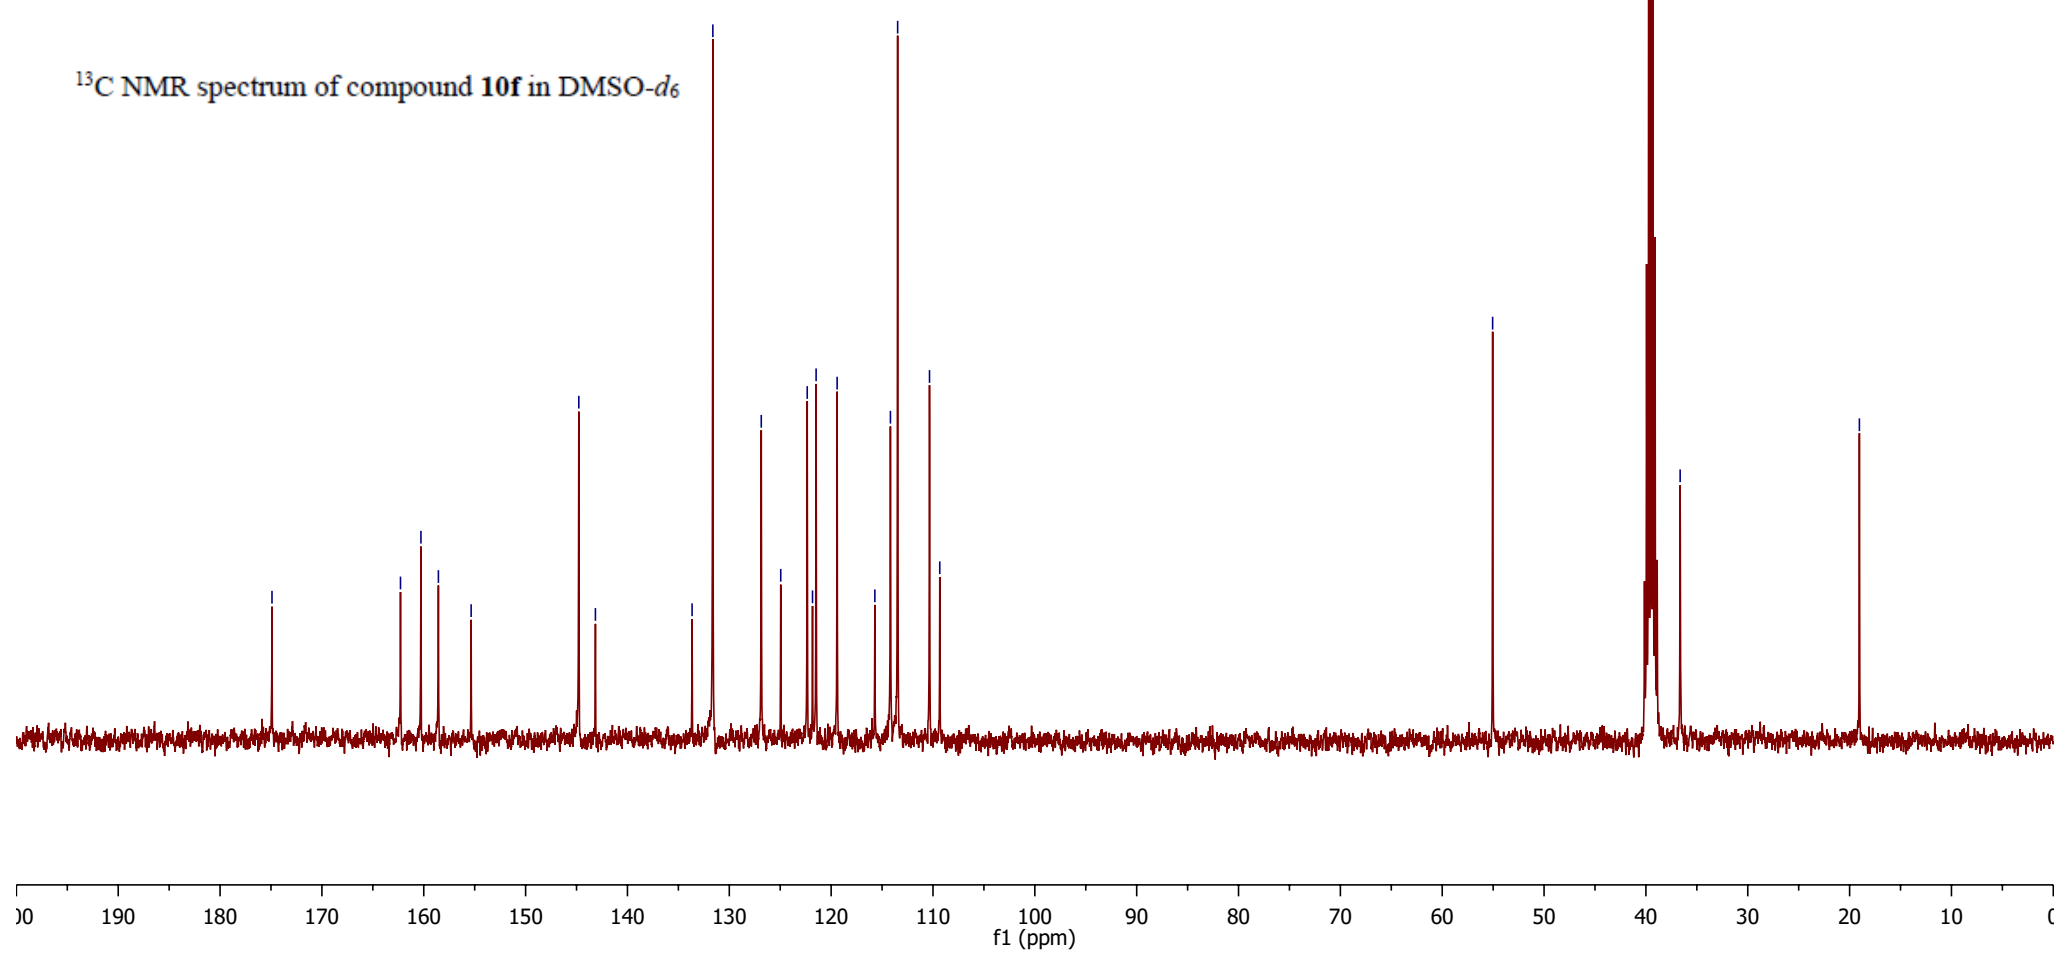

11.89

8.24  
7.93  
7.92  
7.67  
7.65  
7.62  
7.61  
7.22  
7.21  
7.19  
7.18  
7.16  
7.14  
6.98  
6.96

5.59

3.77

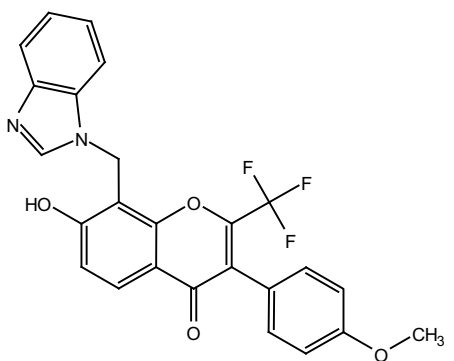

<sup>1</sup>H NMR spectrum of compound 10g in DMSO-d<sub>6</sub>

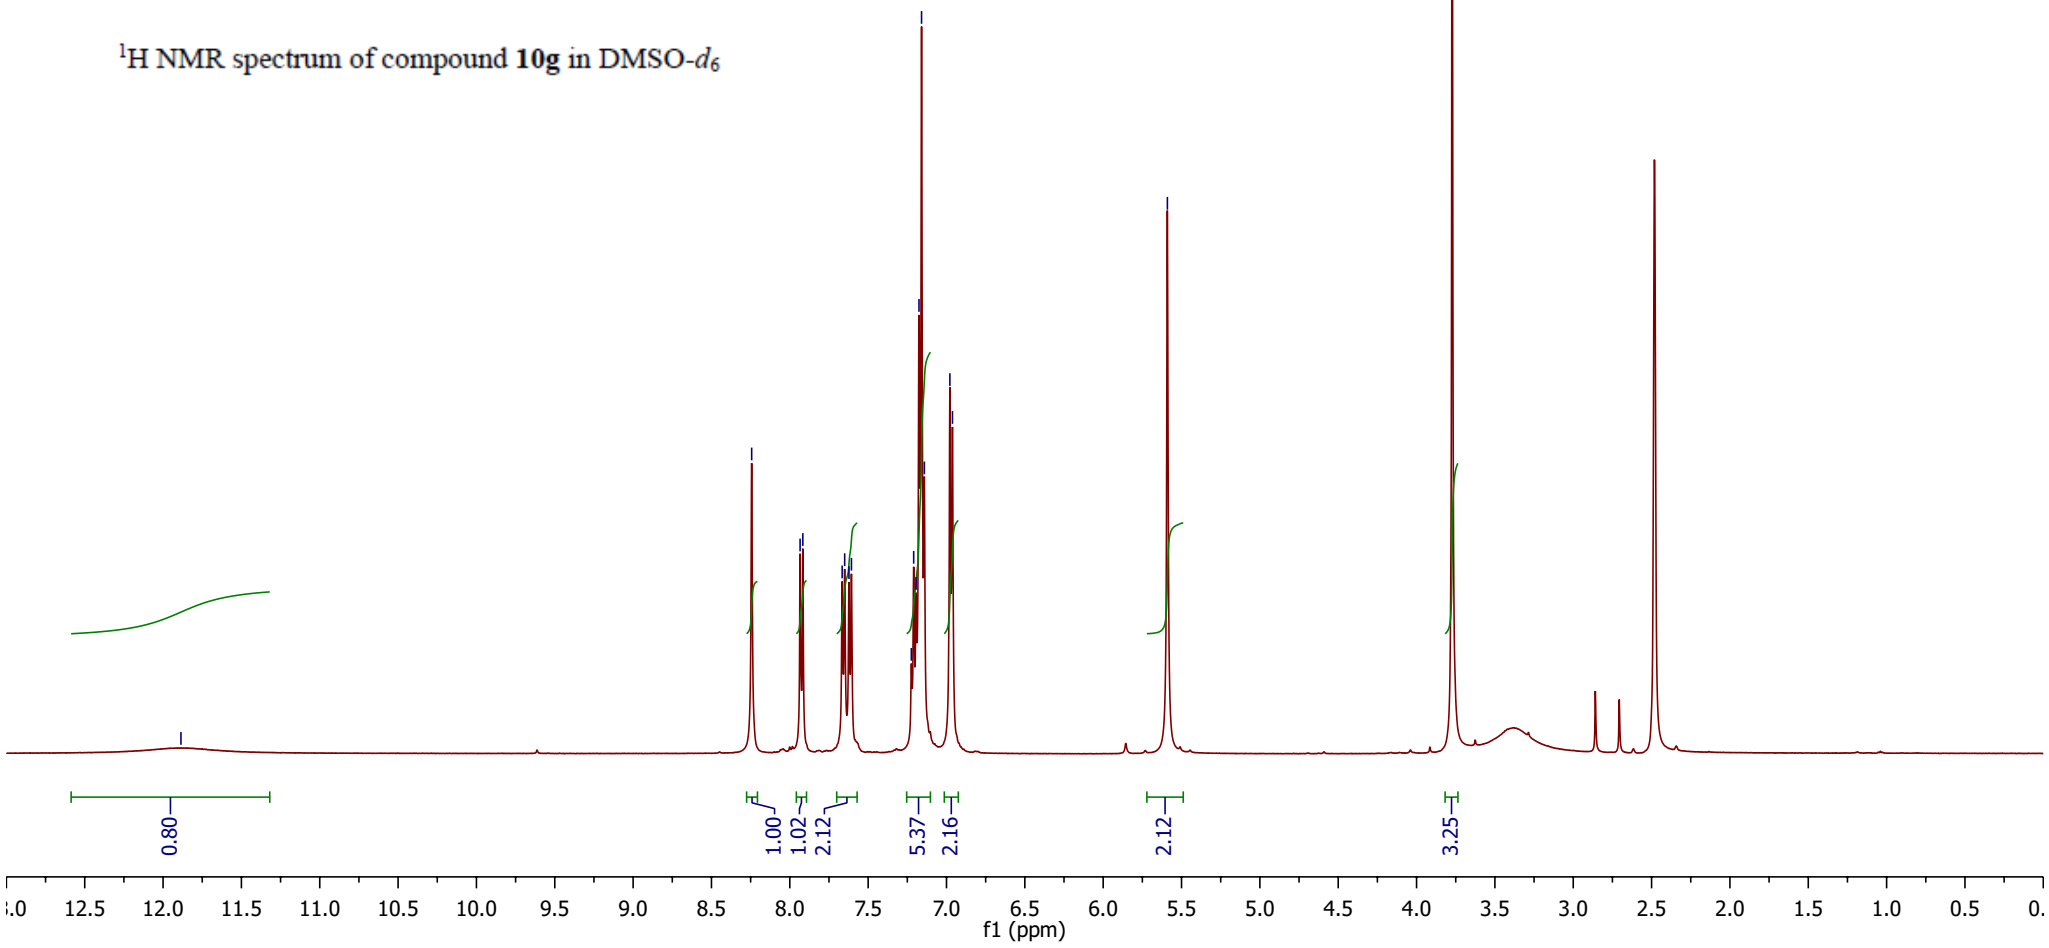

175.30  
161.87  
159.41  
154.75  
146.69  
146.42  
146.13  
144.50  
143.19  
133.58  
131.13  
127.33  
124.89  
122.80  
122.39  
121.57  
121.04  
120.60  
119.45  
118.41  
116.20  
115.64  
115.61  
113.38  
110.17  
109.64

55.10

36.54

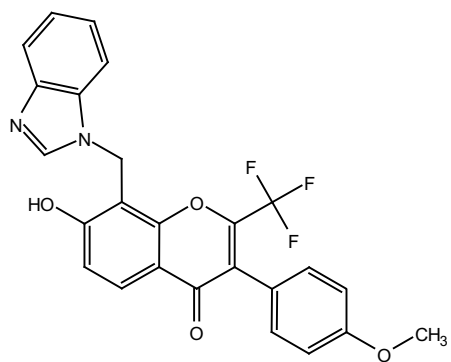

$^{13}\text{C}$  NMR spectrum of compound **10g** in  $\text{DMSO-}d_6$

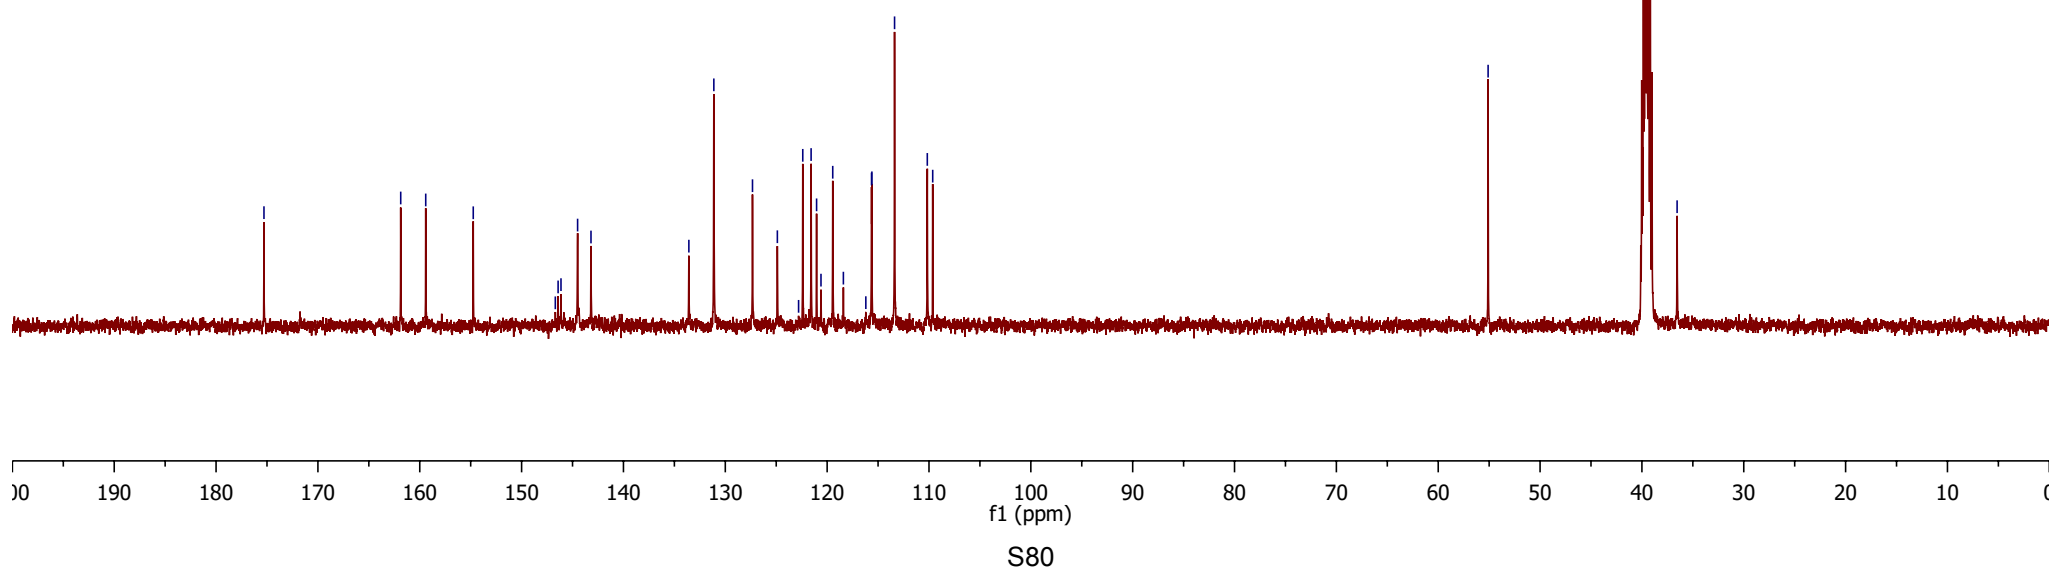



—11.57

—8.60  
—8.33  
—7.99  
—7.97  
—7.73  
—7.71  
—7.70  
—7.68  
—7.62  
—7.60  
—7.41  
—7.40  
—7.24  
—7.22  
—7.21  
—7.17  
—7.16  
—7.14  
—7.10  
—7.08  
—5.58

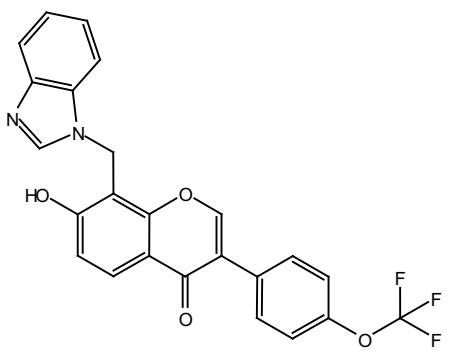

<sup>1</sup>H NMR spectrum of compound **10h** in DMSO-*d*<sub>6</sub>

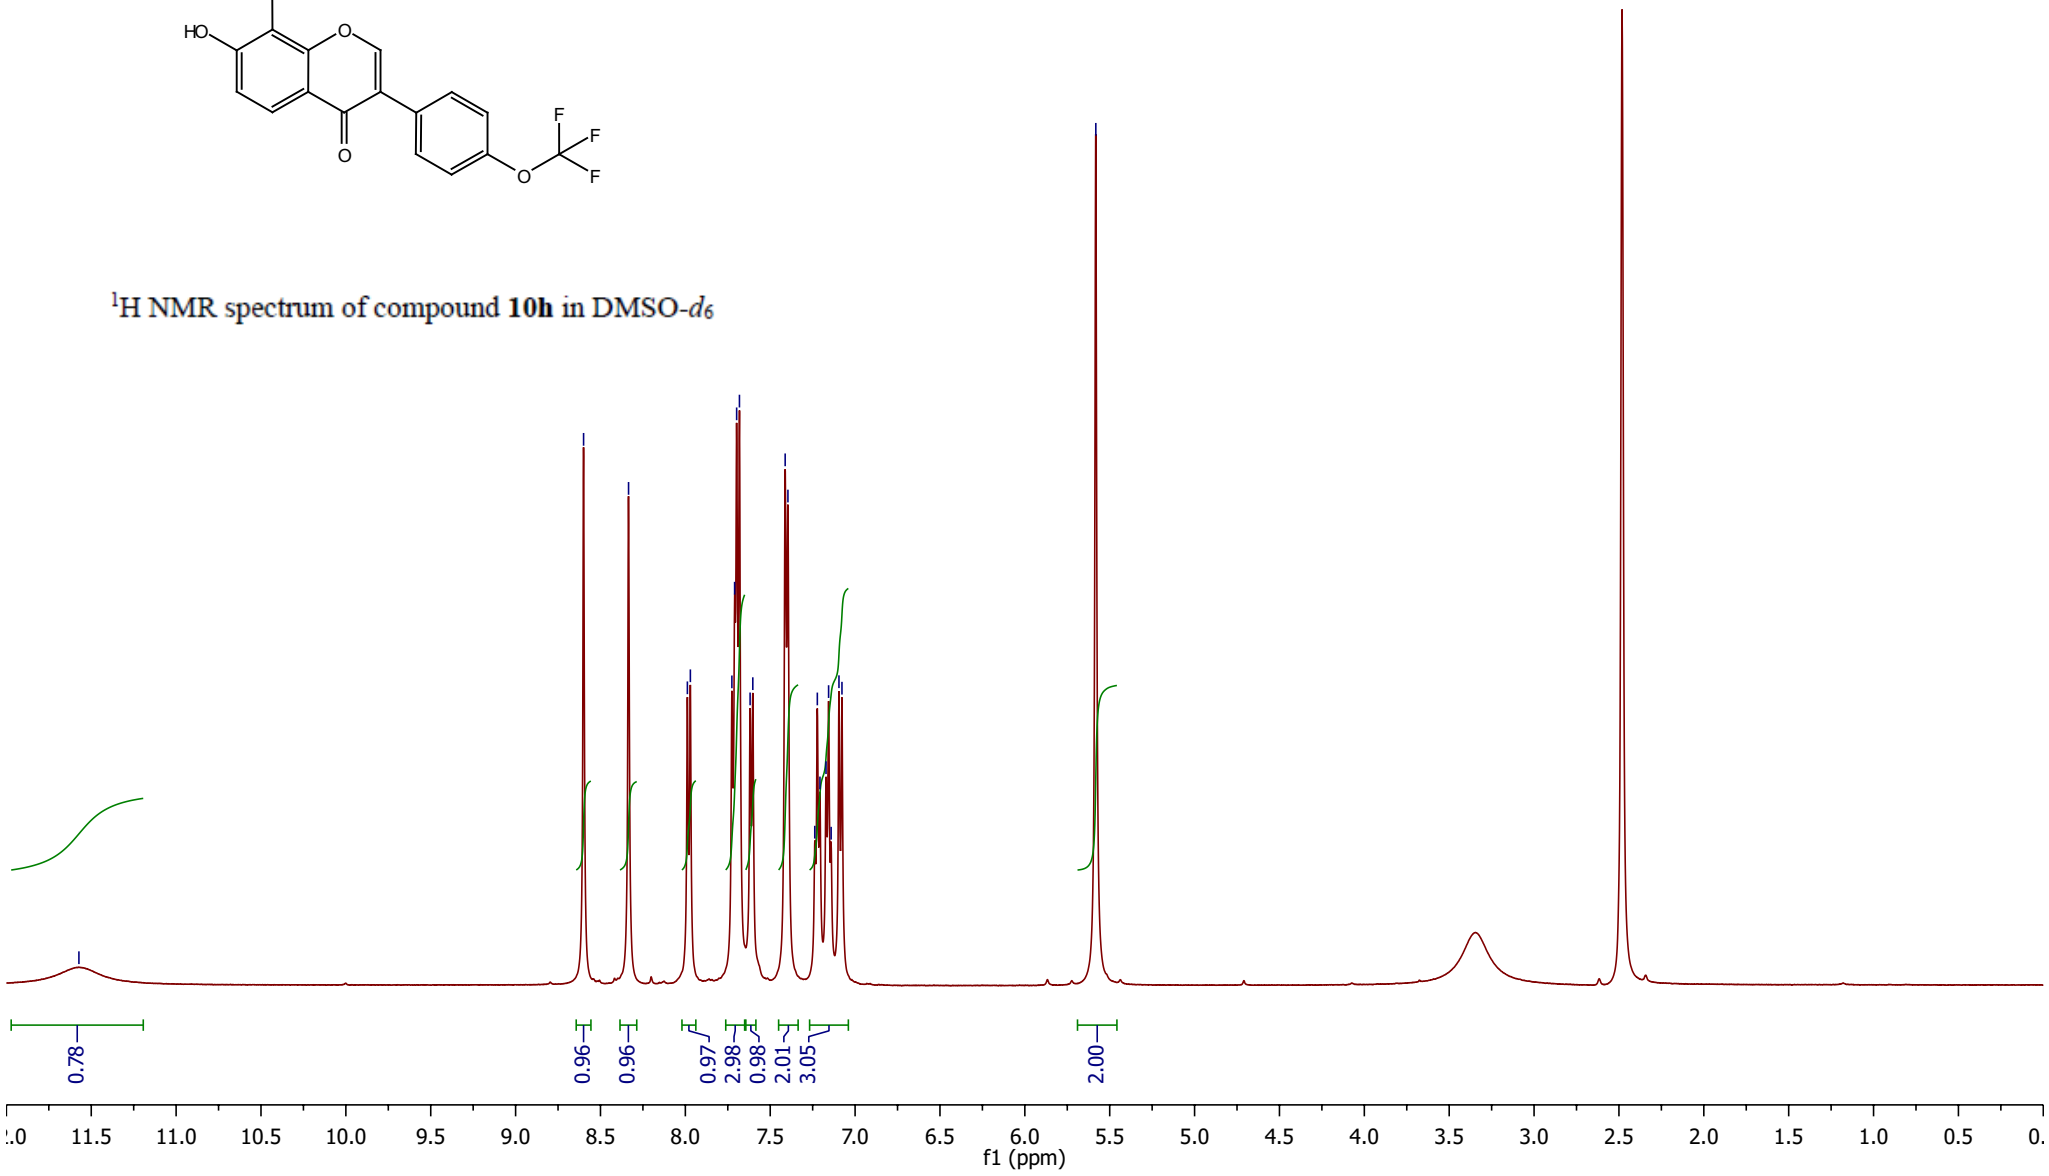

S81

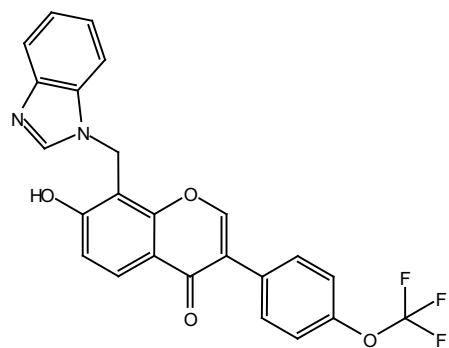

$^{13}\text{C}$  NMR spectrum of compound 10h in  $\text{DMSO-}d_6$

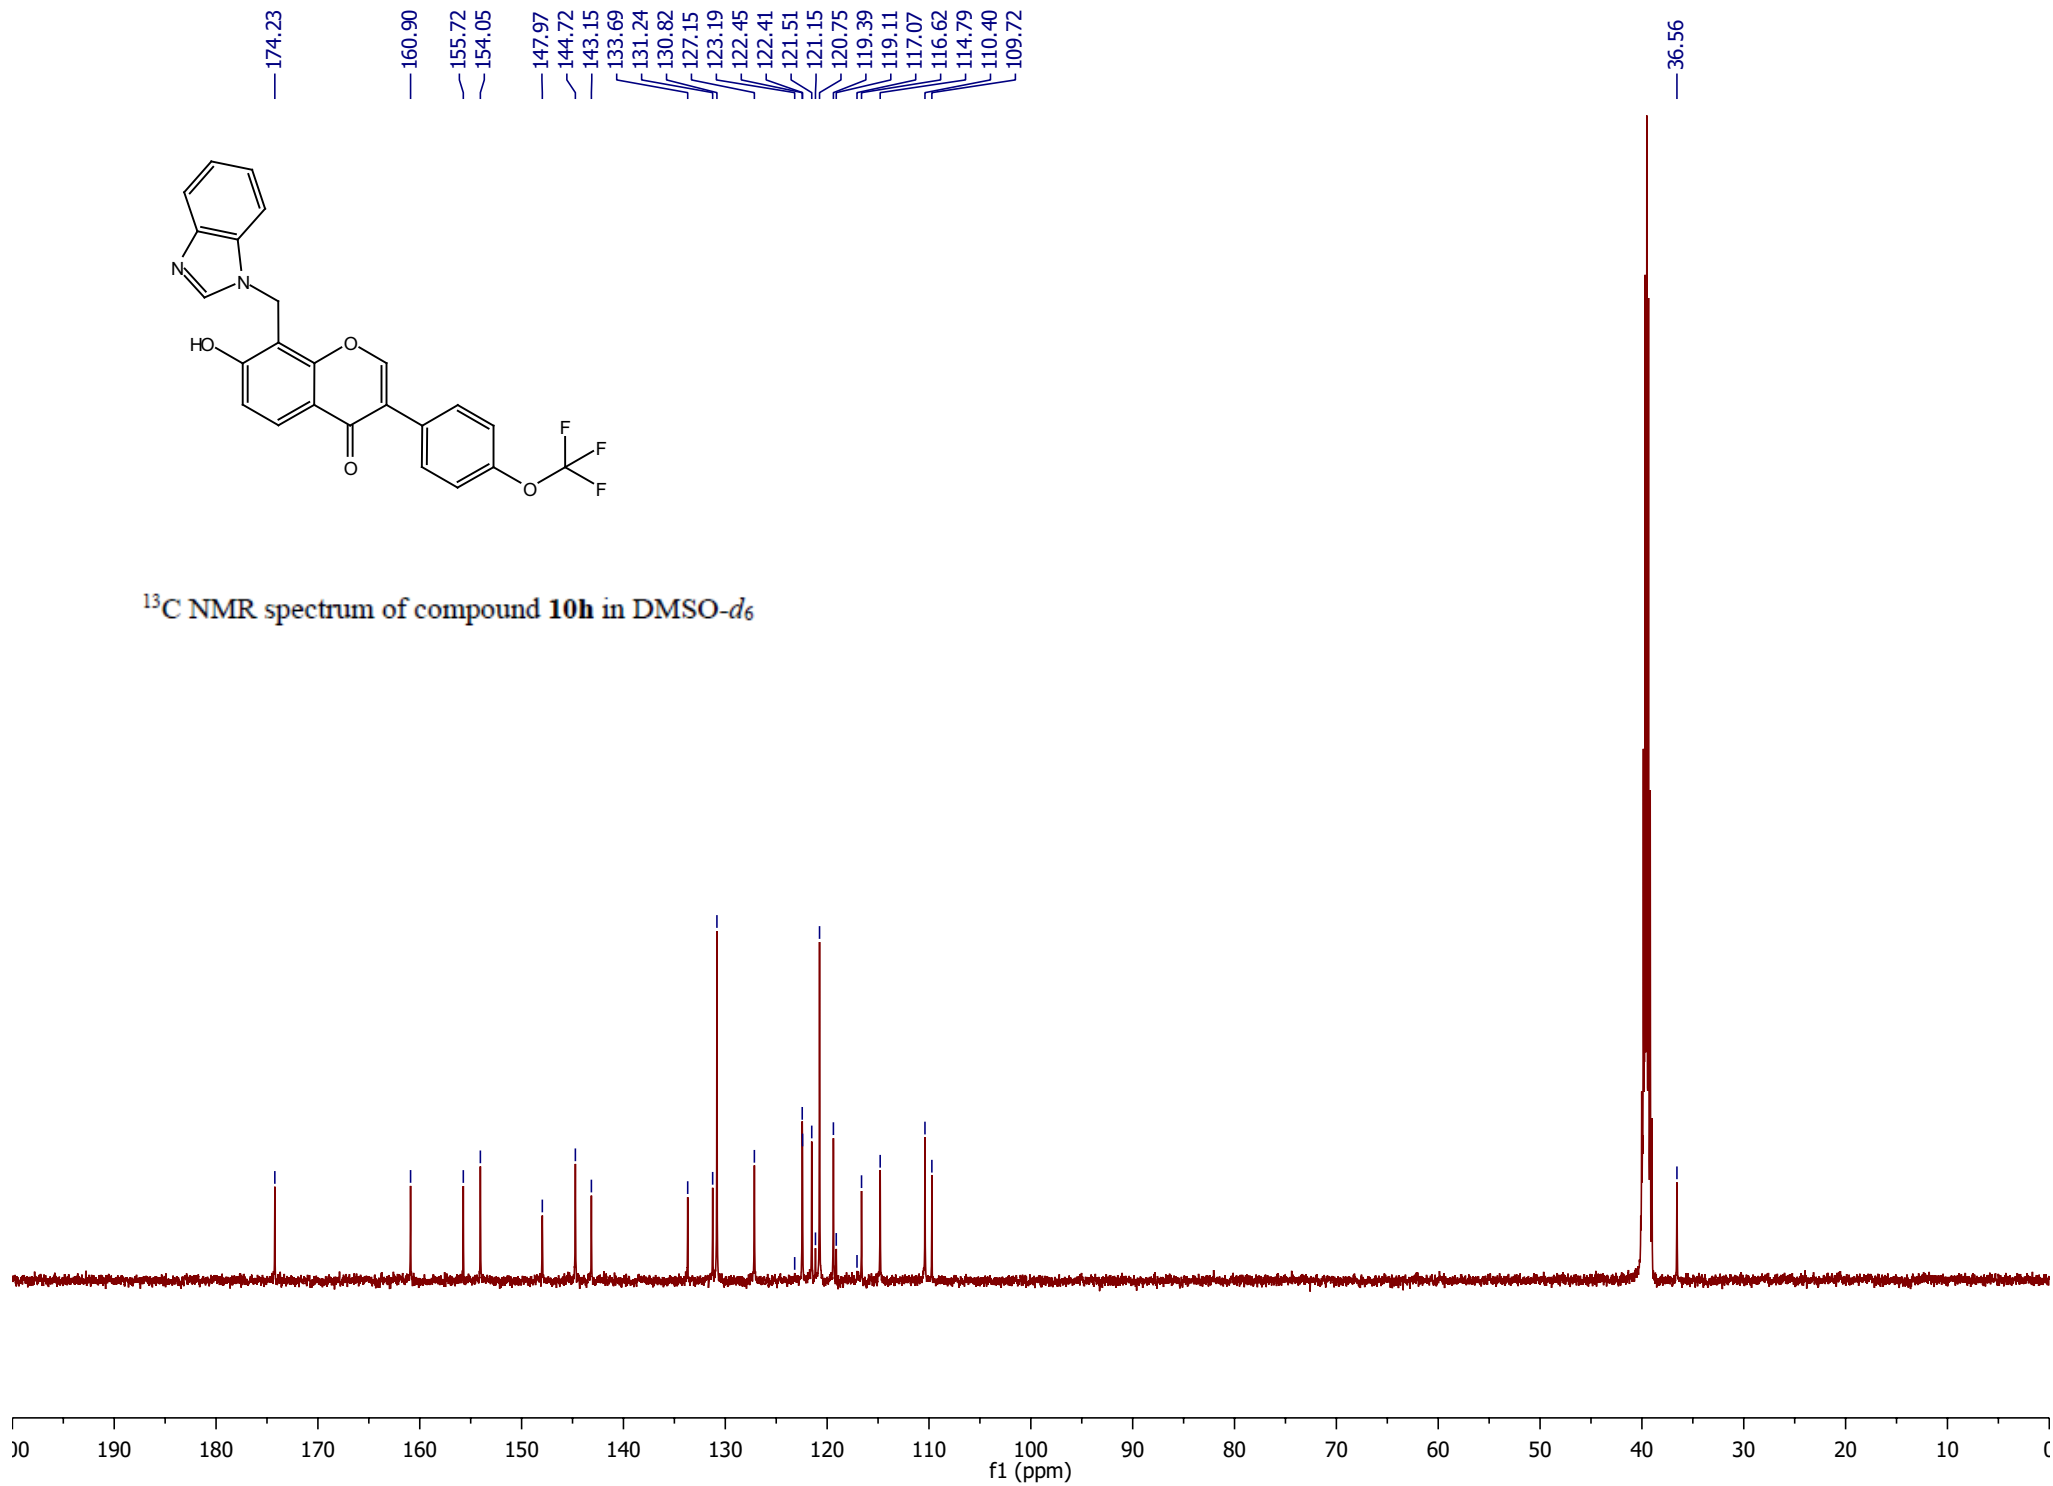

10.98

7.93

7.91

7.64

7.52

7.50

7.37

6.90

6.88

6.23

6.21

6.18

5.39

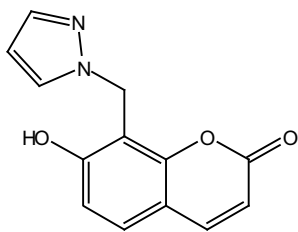

$^1\text{H}$  NMR spectrum of compound **11a** in  $\text{DMSO-}d_6$

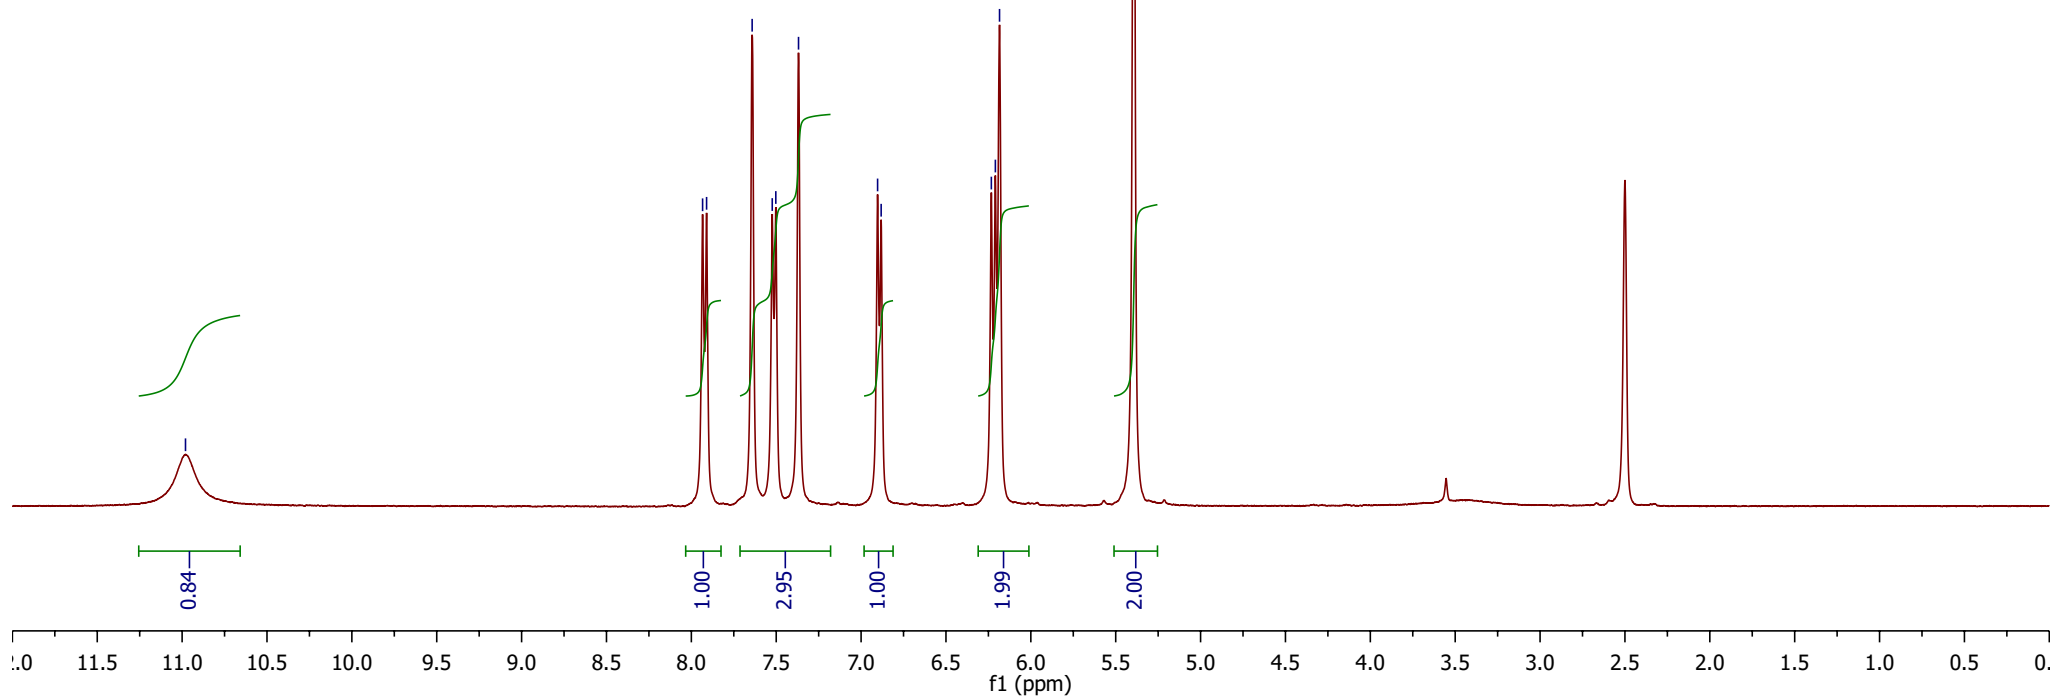

S83

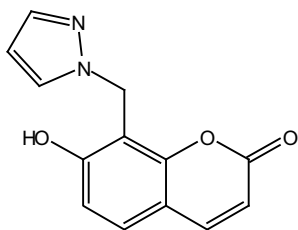

160.08  
159.80  
153.85  
144.78  
138.36  
129.76  
129.44  
112.62  
111.33  
111.31  
109.78  
104.88  
42.98

$^{13}\text{C}$  NMR spectrum of compound **11a** in  $\text{DMSO-}d_6$

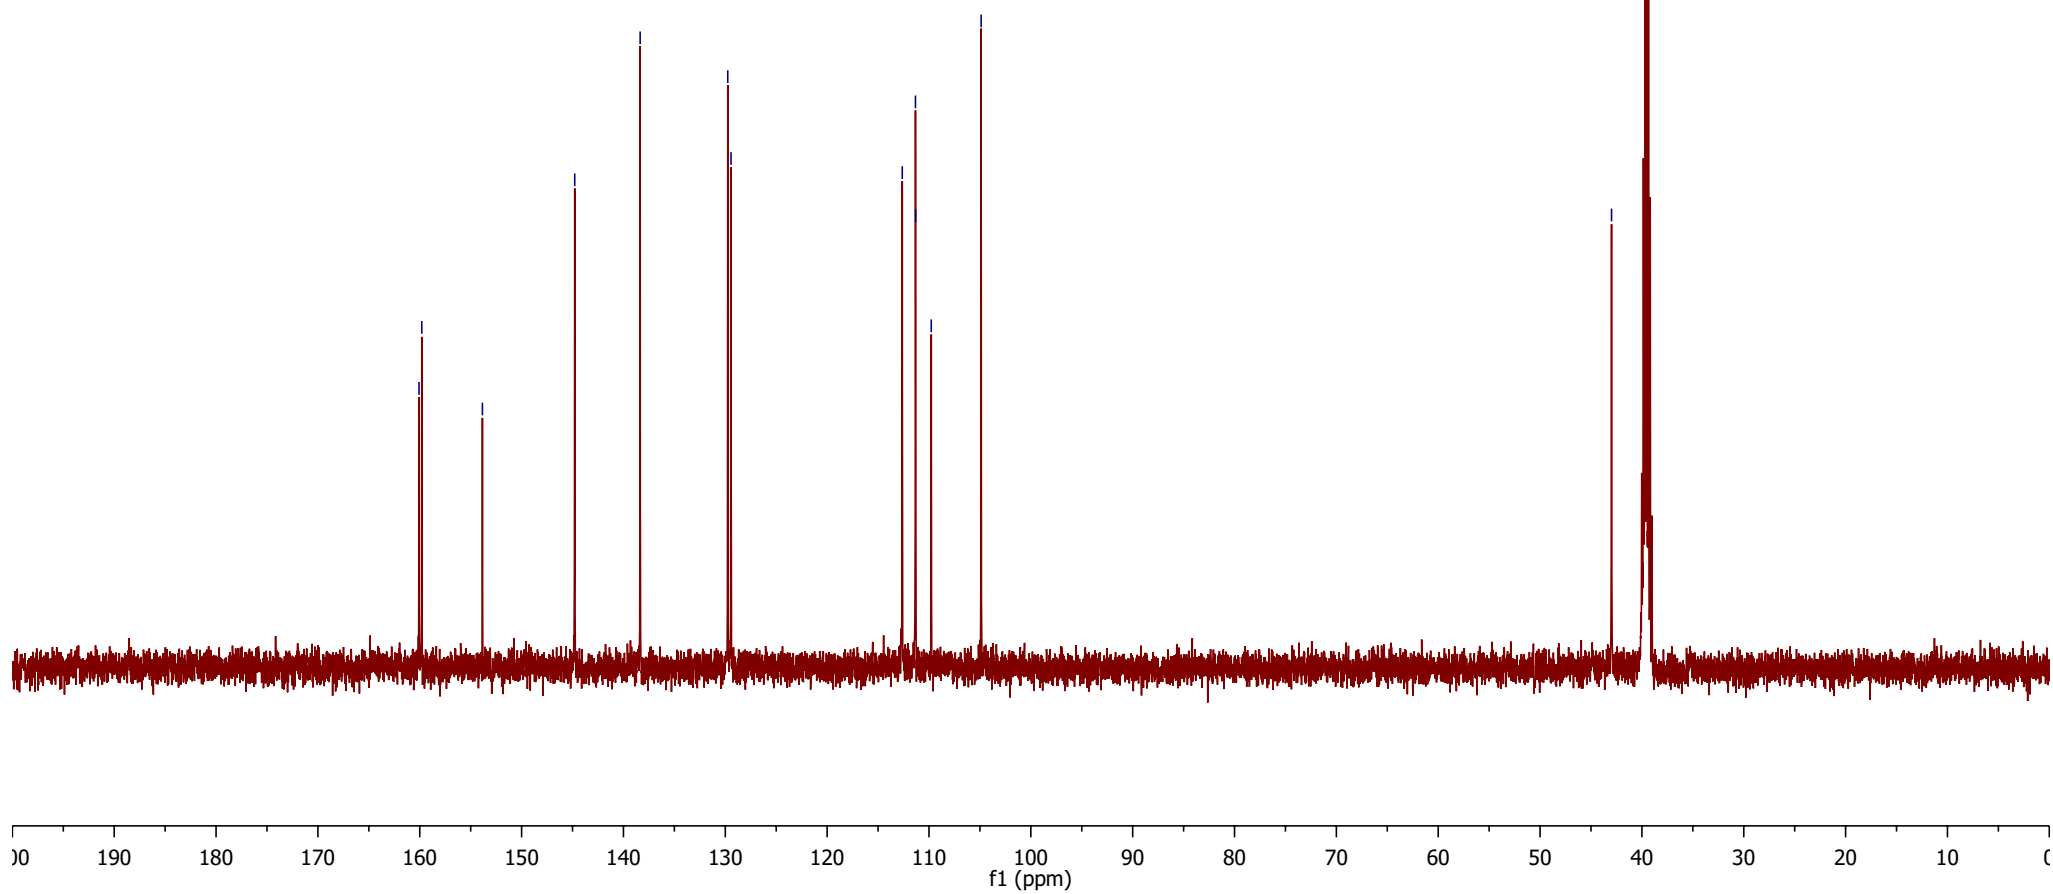

— 10.92

7.62

7.60

7.36

7.35

6.92

6.90

6.18

6.18

6.17

6.16

— 5.39

— 2.36

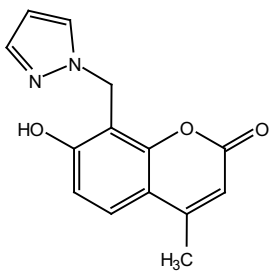

<sup>1</sup>H NMR spectrum of compound 11b in DMSO-d<sub>6</sub>

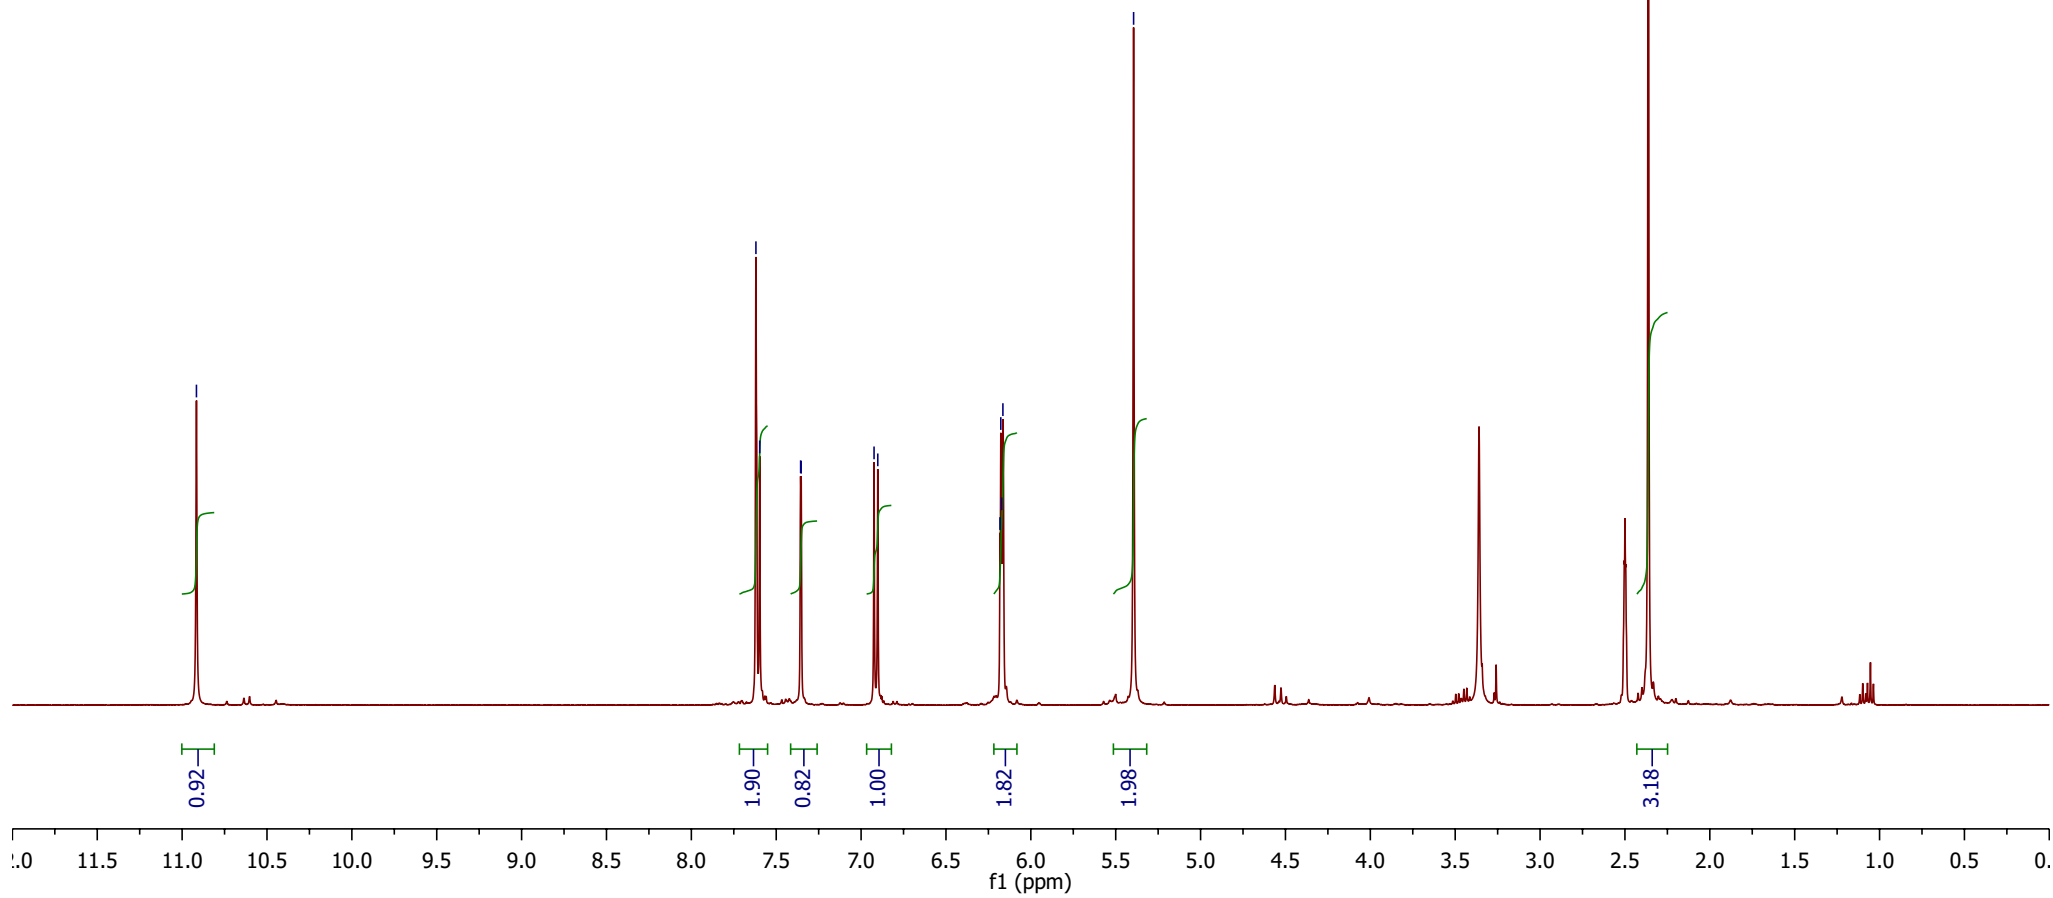

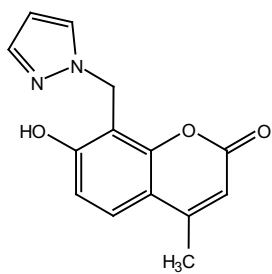

159.88  
159.61

153.81  
153.21

138.33

129.69

126.32

112.29

112.05

110.21

109.72

104.85

43.15

18.25

<sup>13</sup>C NMR spectrum of compound **11b** in DMSO-*d*<sub>6</sub>

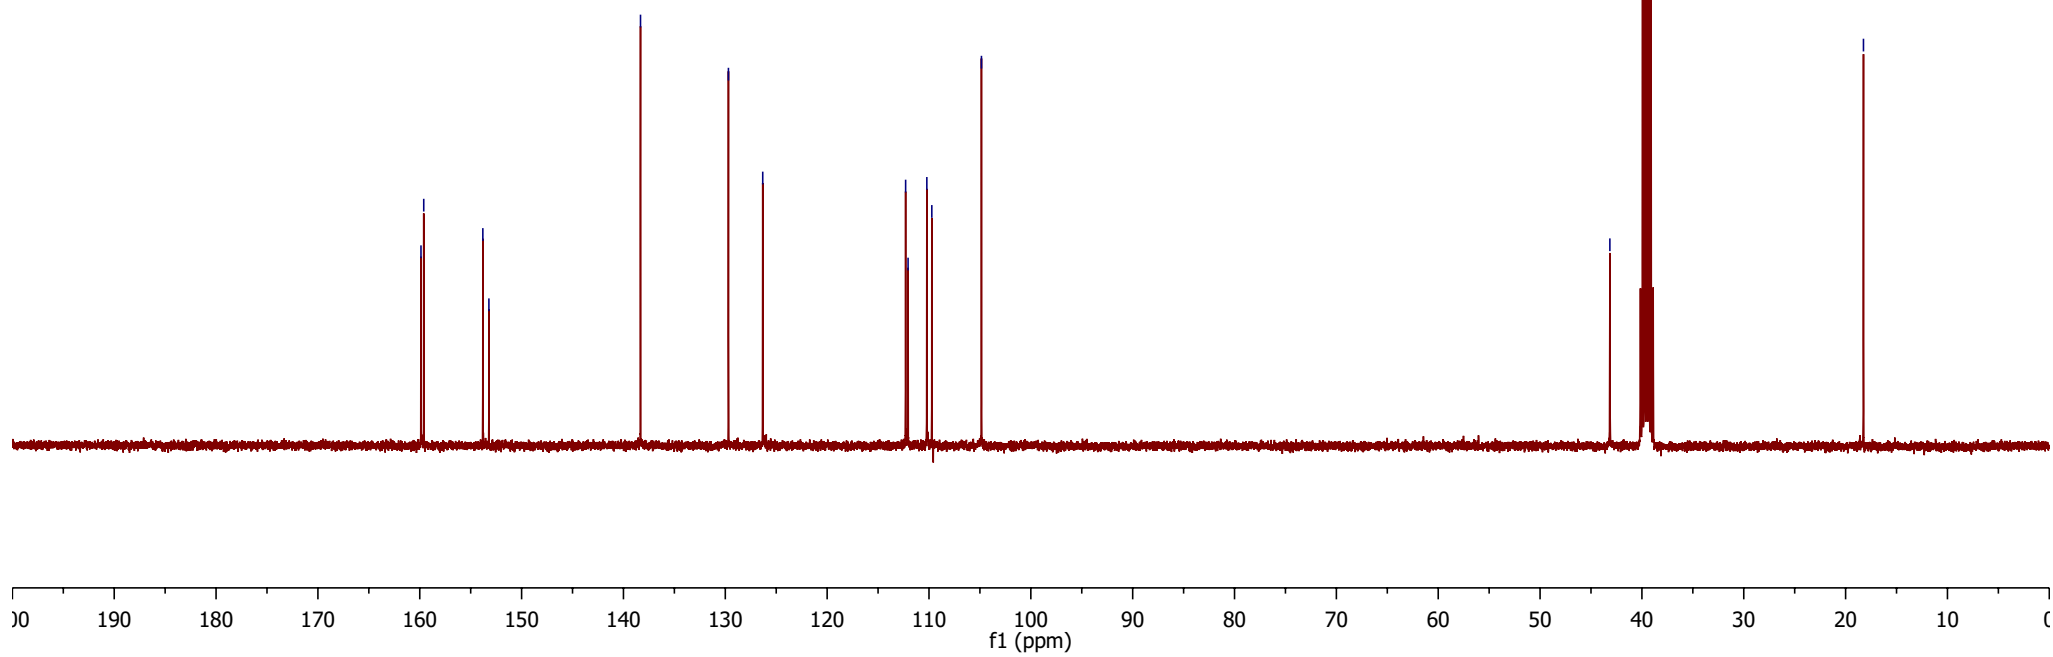

—11.00

7.85  
7.83  
7.67  
7.67  
7.36  
7.35  
6.99  
6.96

6.18  
6.18  
6.17

—5.43

—2.33

—1.87

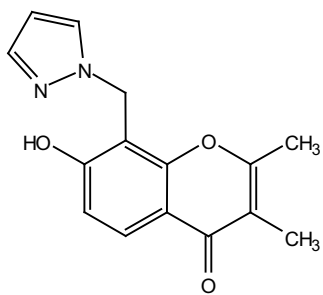

$^1\text{H}$  NMR spectrum of compound 11c in  $\text{DMSO}-d_6$

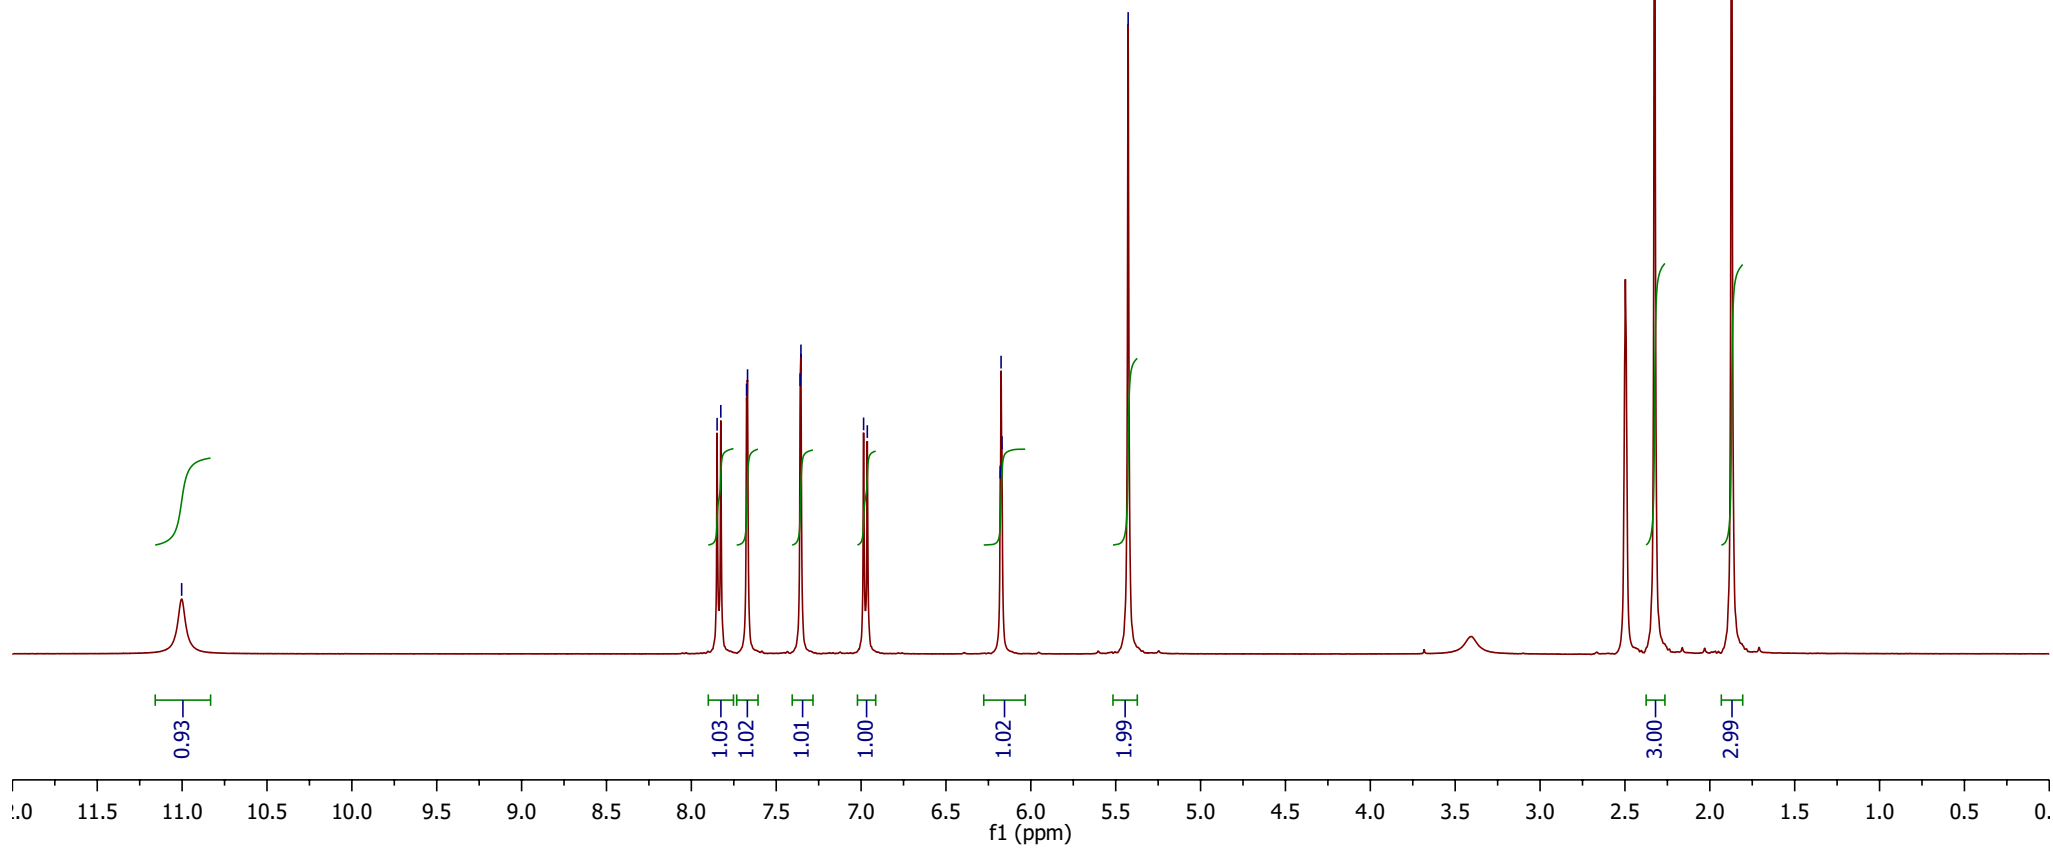

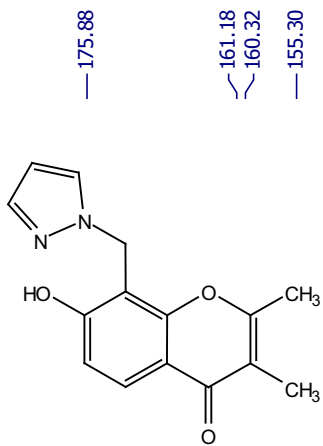

— 175.88

— 161.18

— 160.32

— 155.30

— 138.38

— 129.87

— 126.32

— 115.26

— 114.81

— 113.94

— 109.64

— 104.86

— 43.20

— 18.08

— 9.55

<sup>13</sup>C NMR spectrum of compound 11c in DMSO-*d*<sub>6</sub>

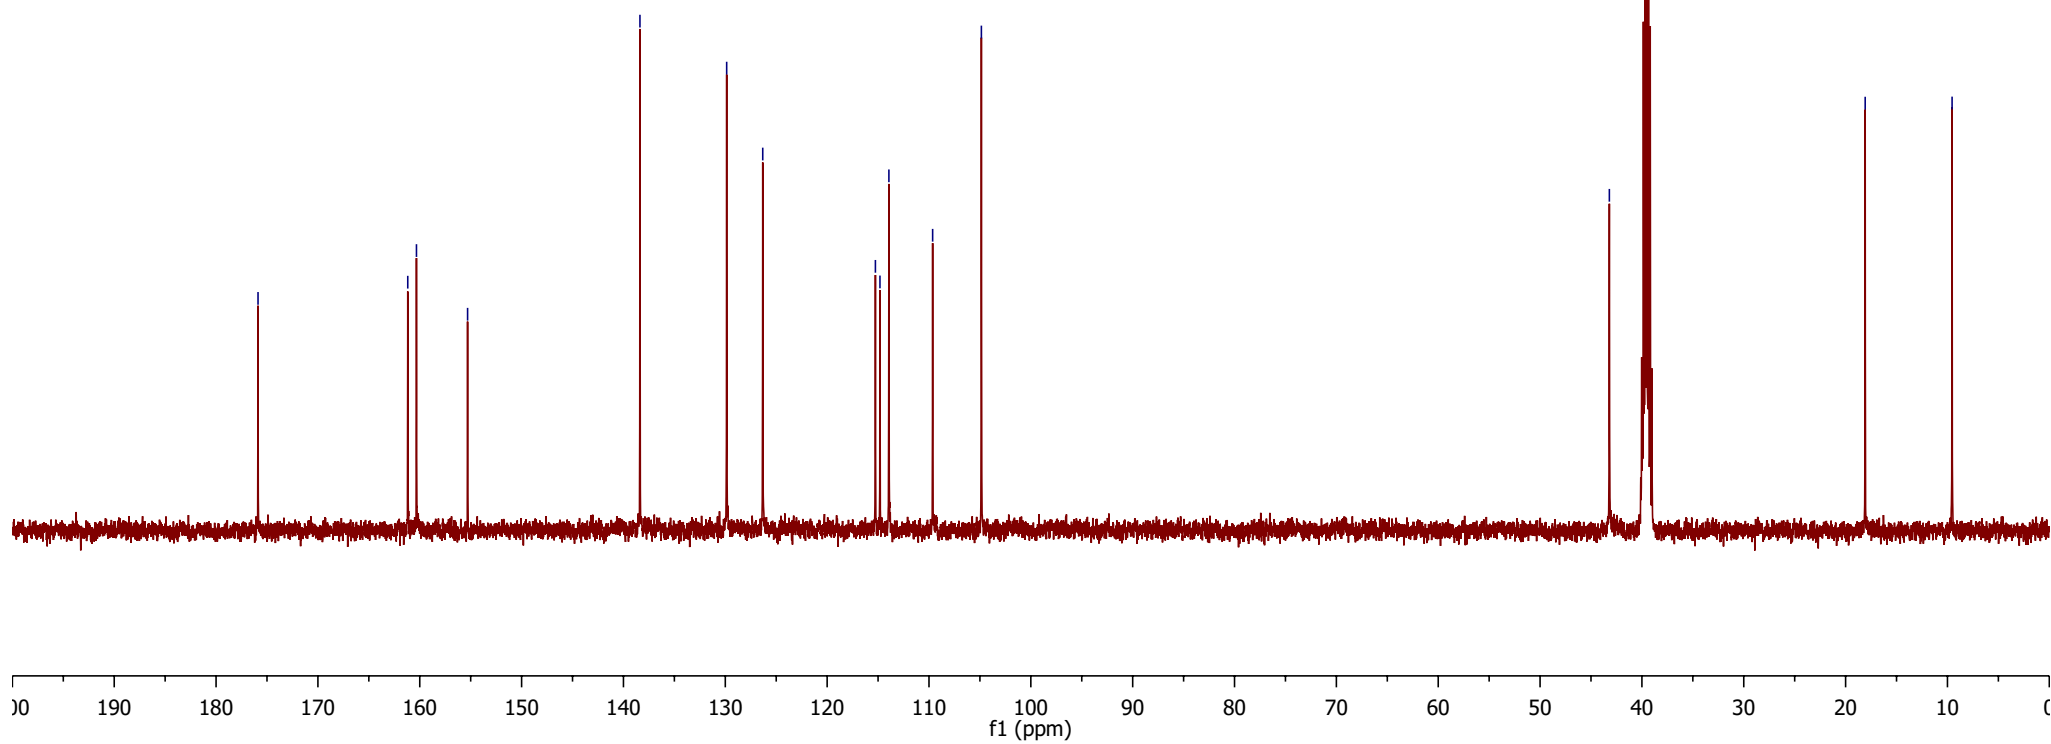



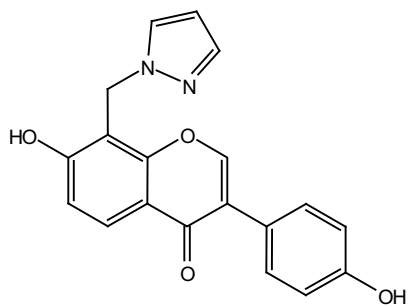

$^1\text{H}$  NMR spectrum of compound 11d in  $\text{DMSO-}d_6$

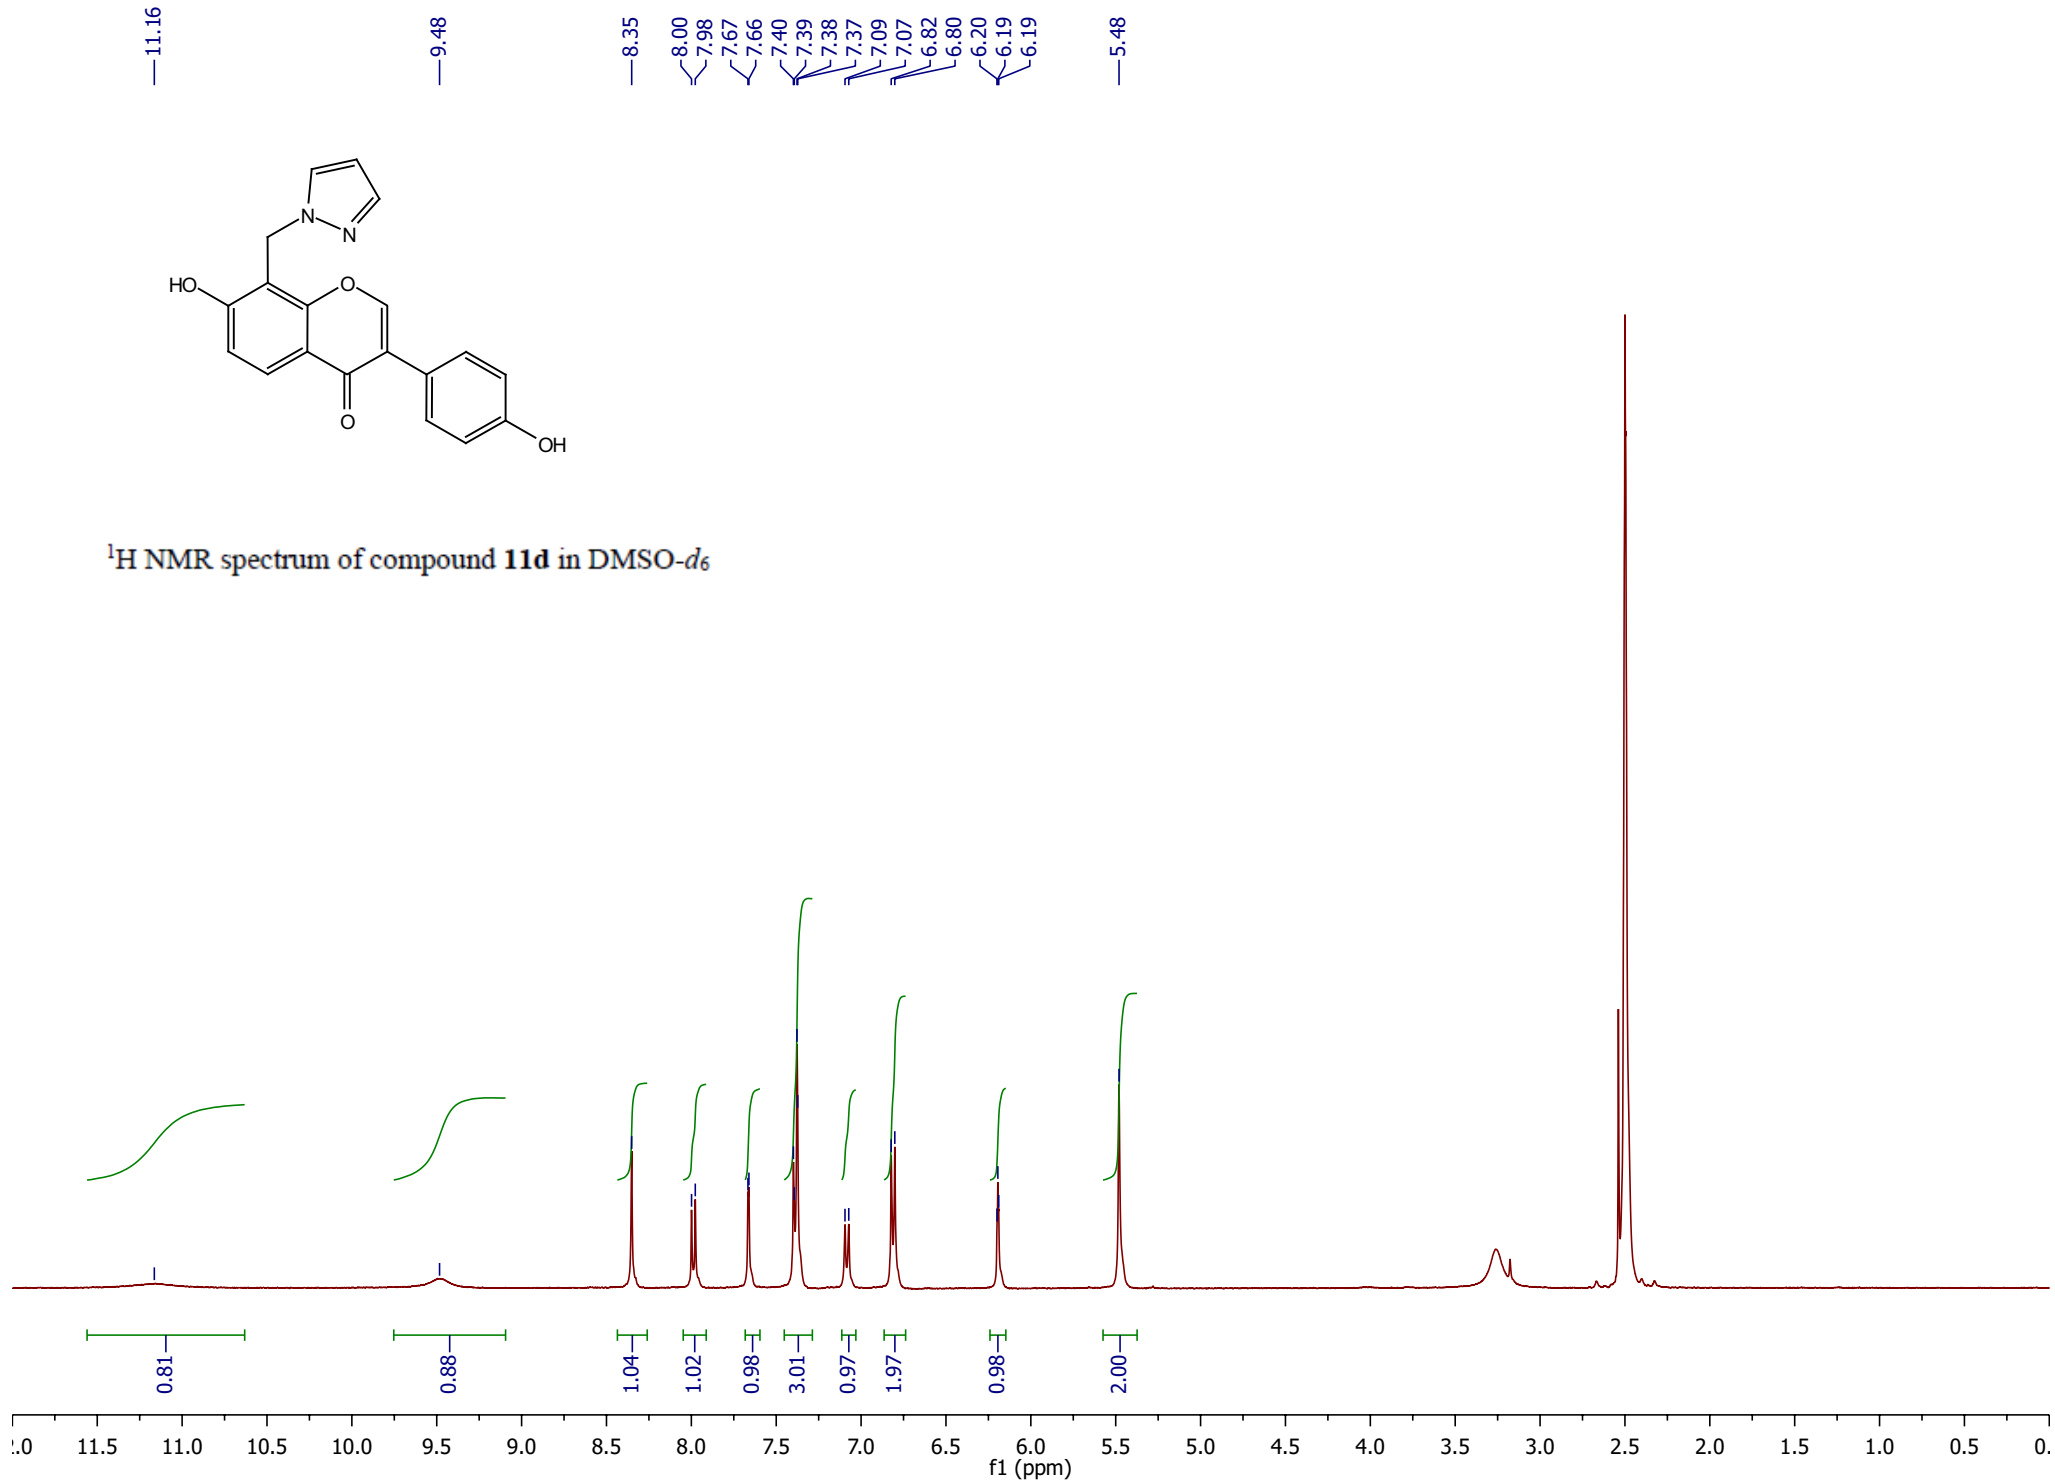

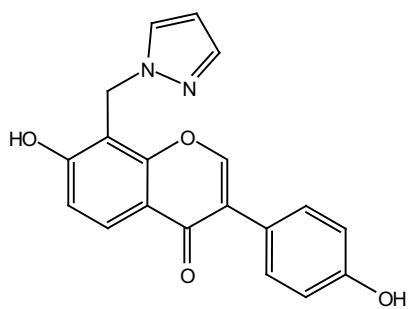

$^{13}\text{C}$  NMR spectrum of compound 11d in  $\text{DMSO-}d_6$

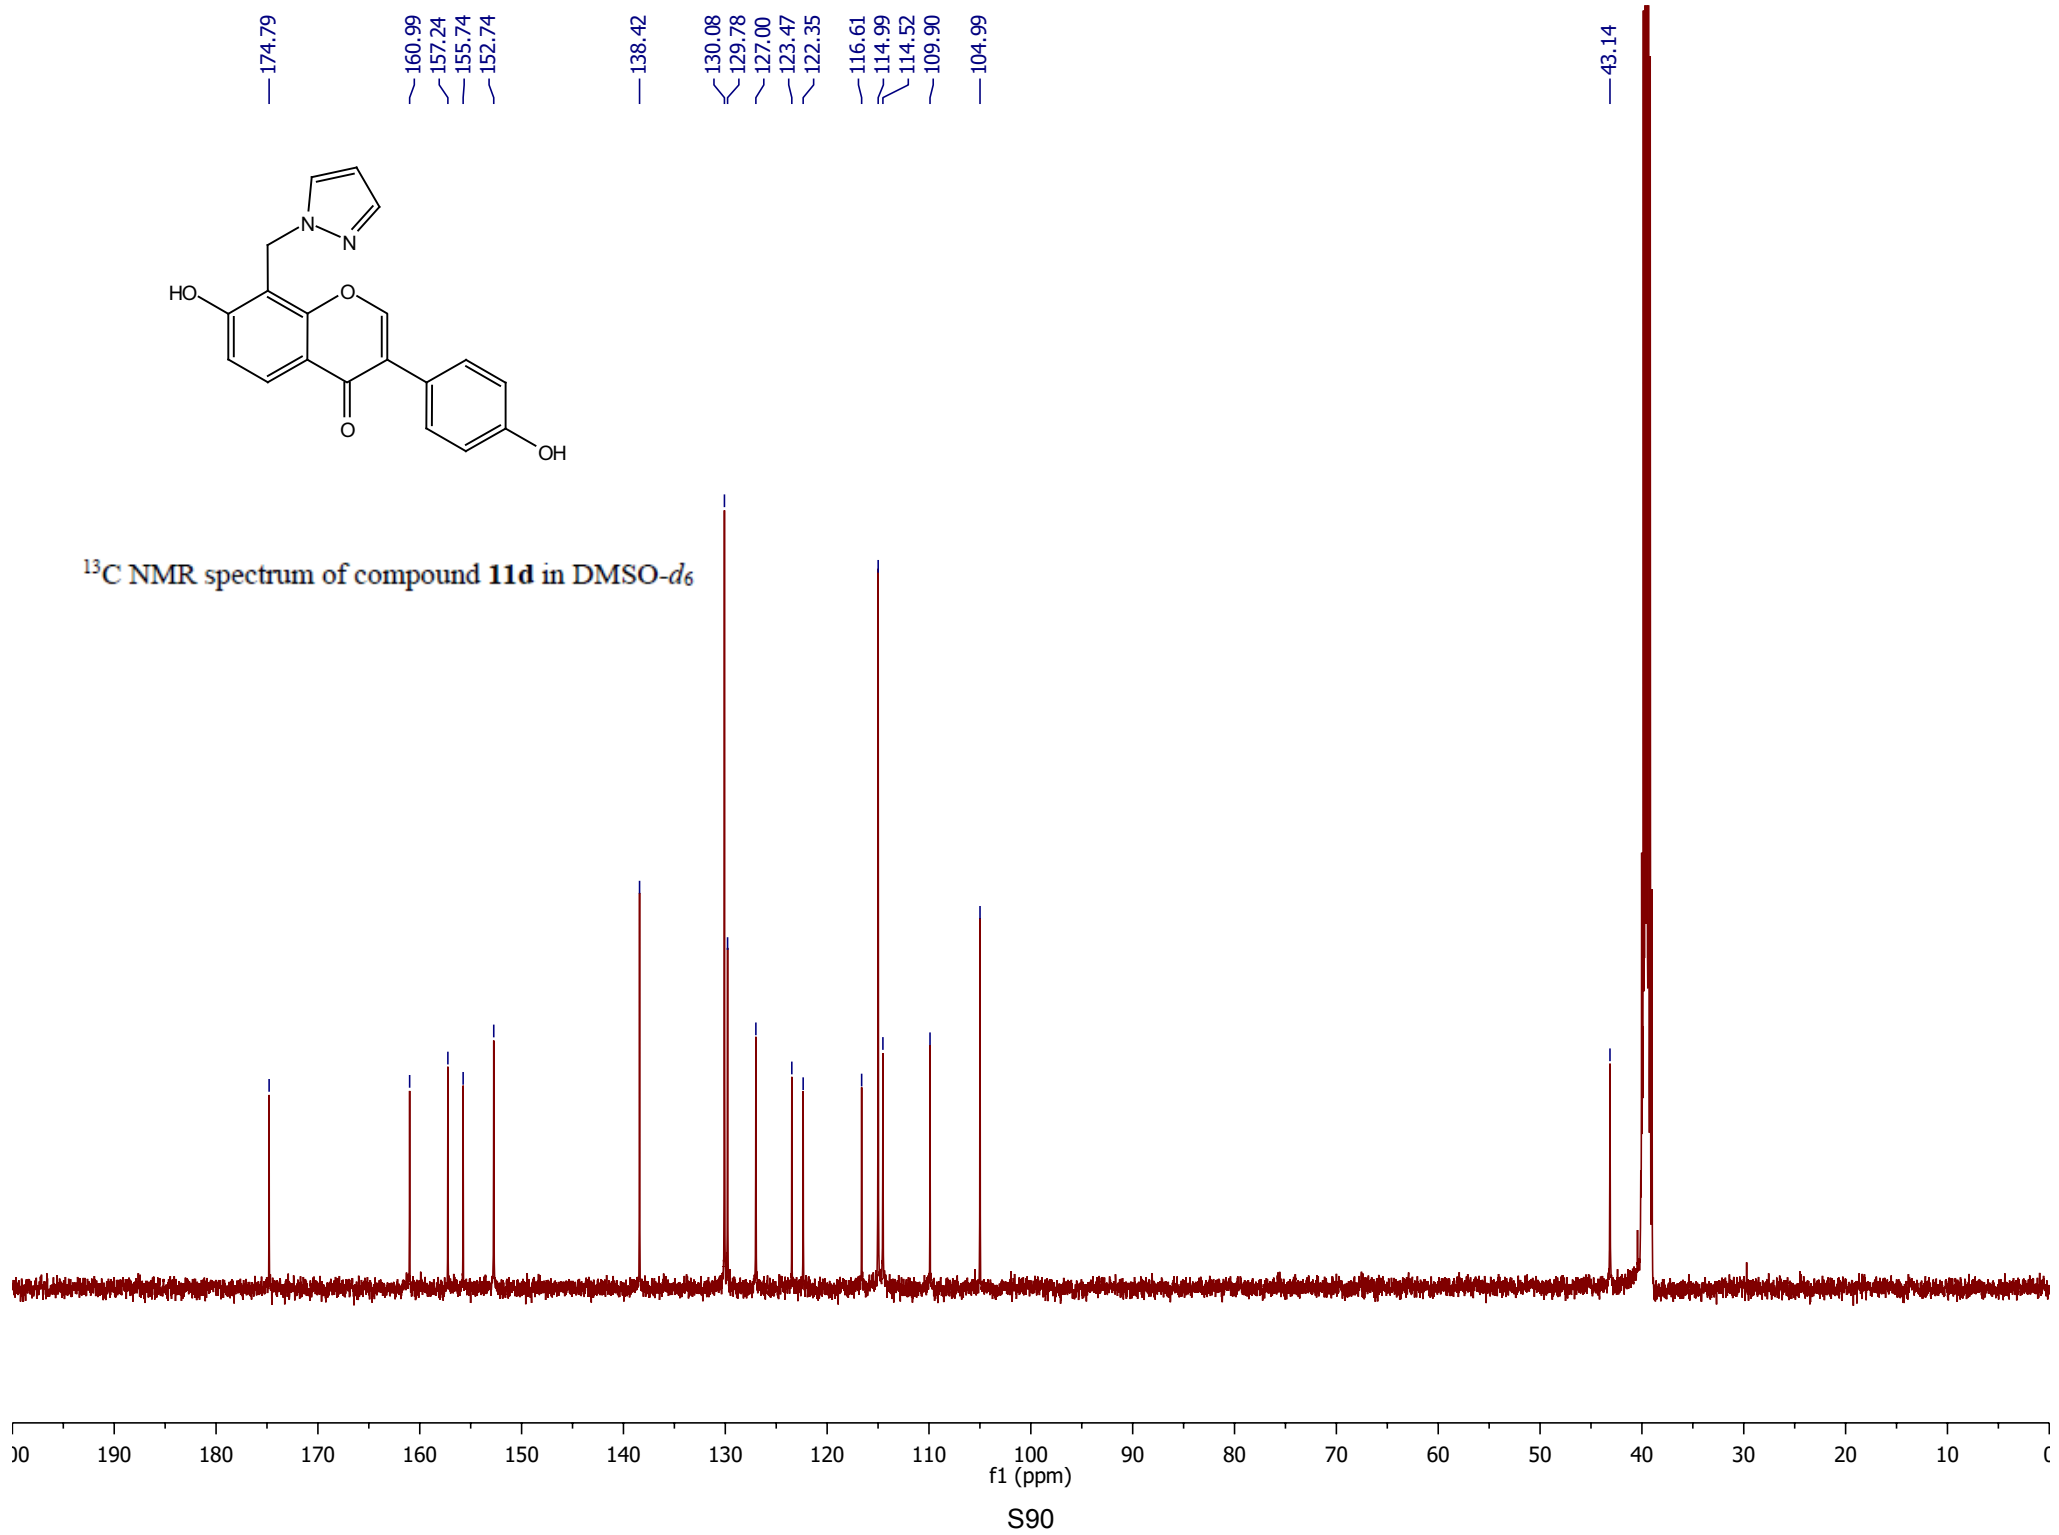

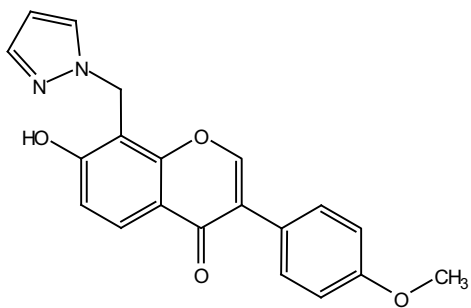

$^1\text{H}$  NMR spectrum of compound **11e** in  $\text{DMSO-}d_6$

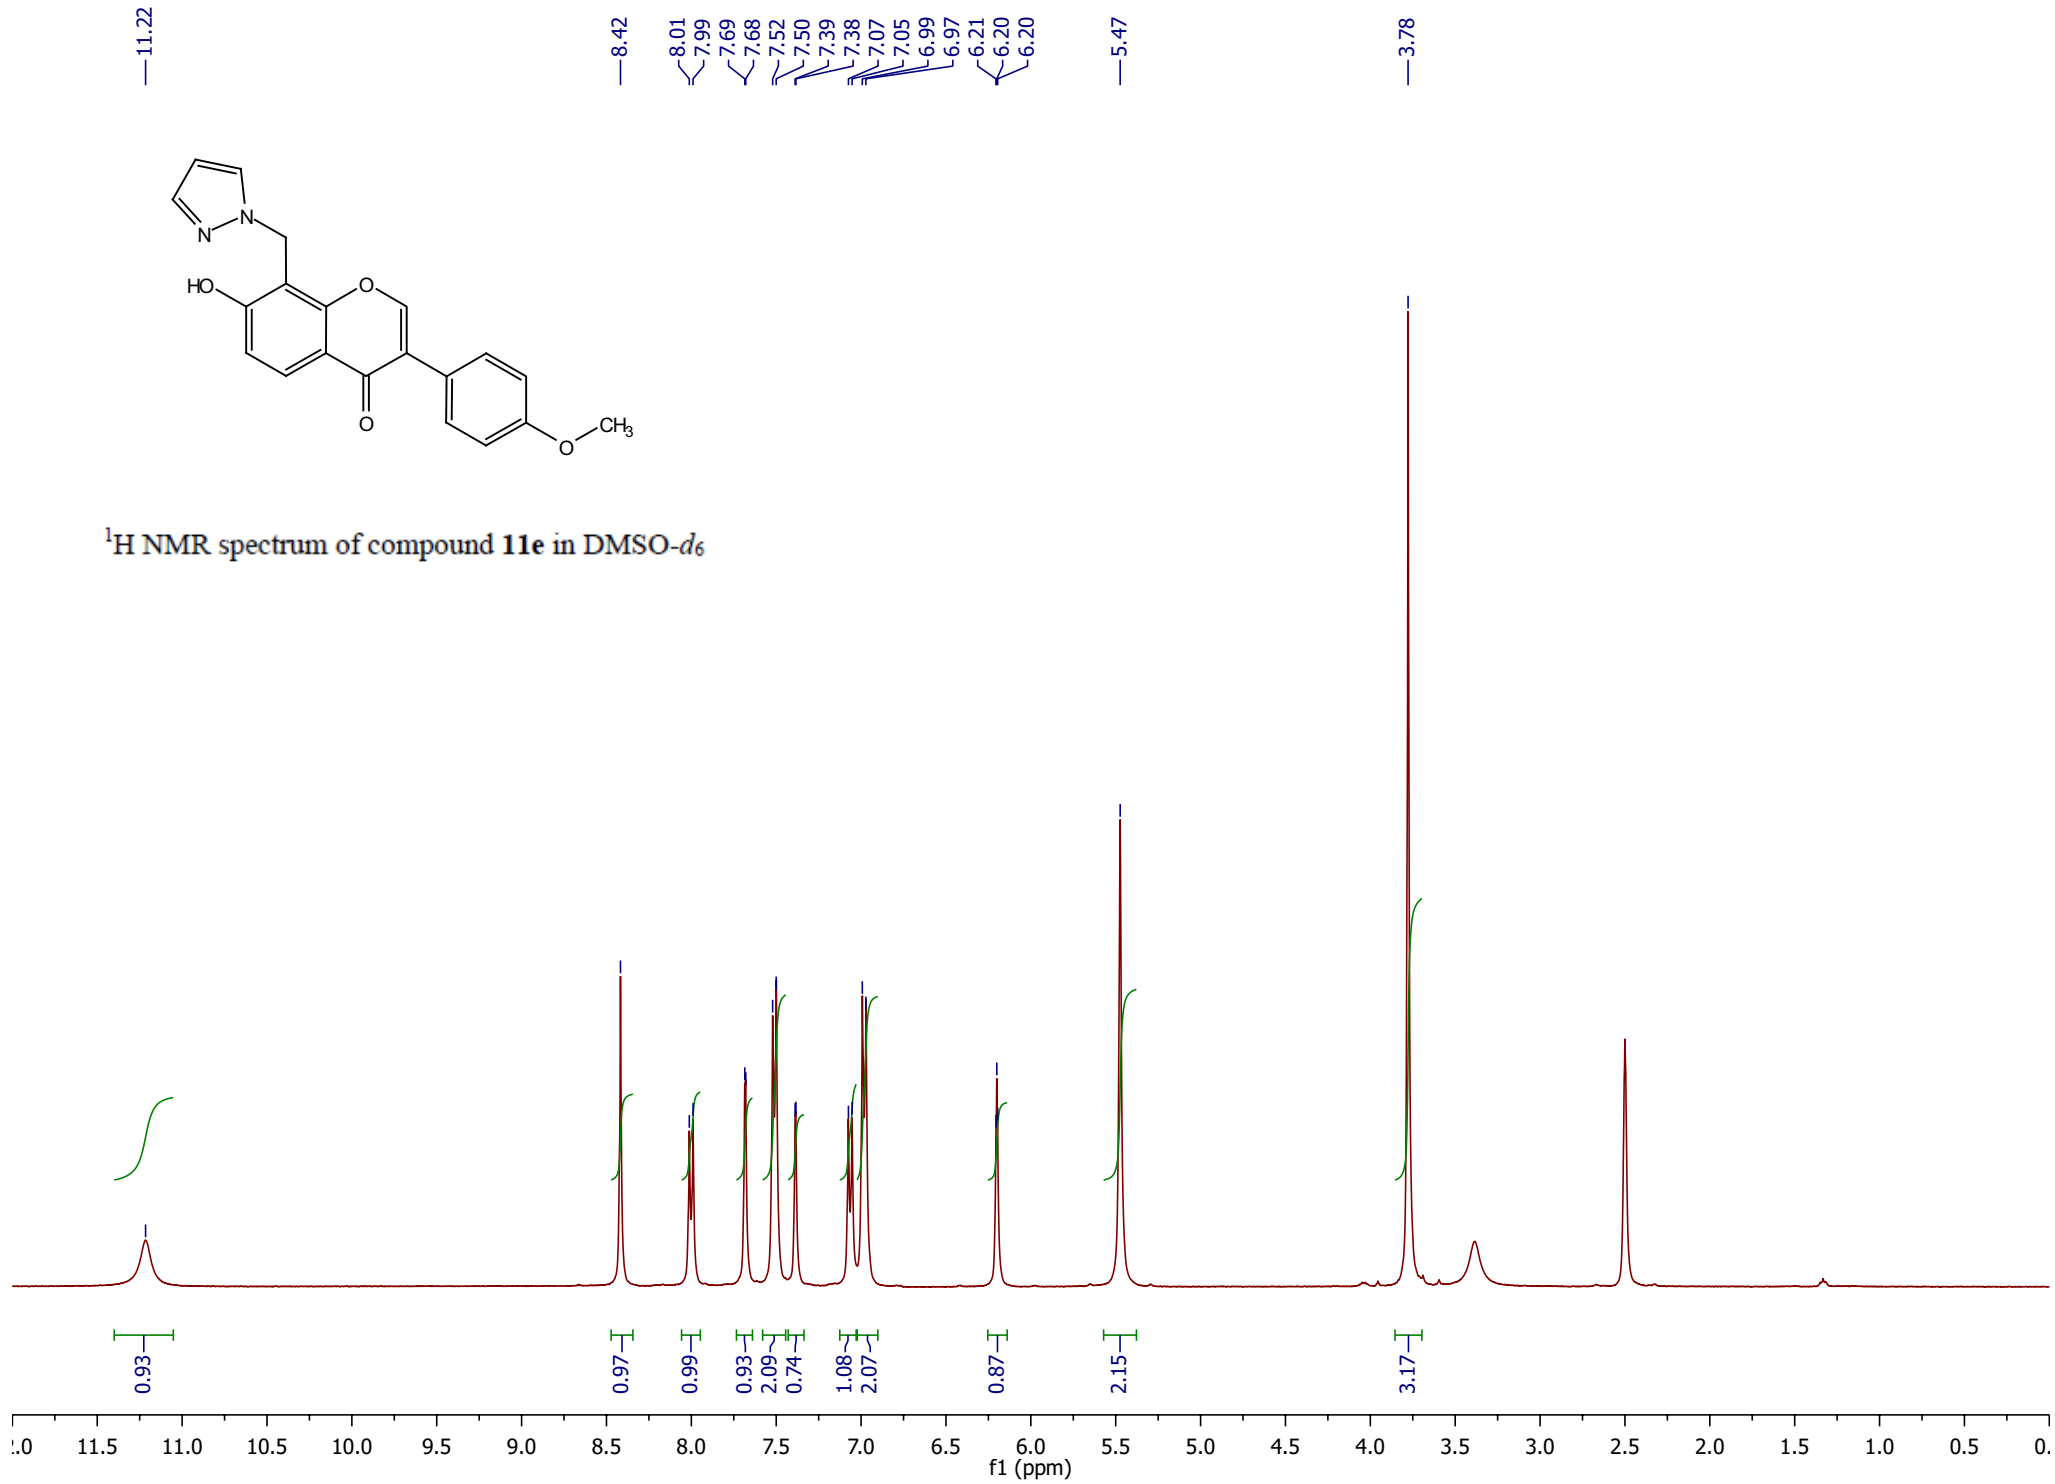

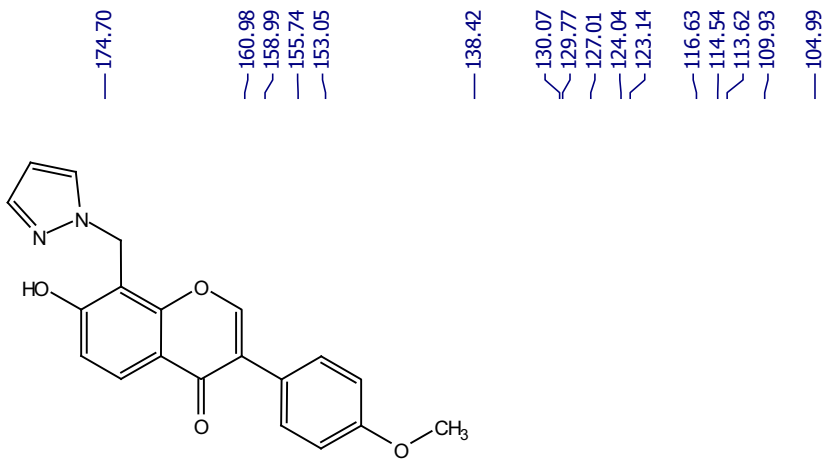

$^{13}\text{C}$  NMR spectrum of compound 11e in  $\text{DMSO-}d_6$

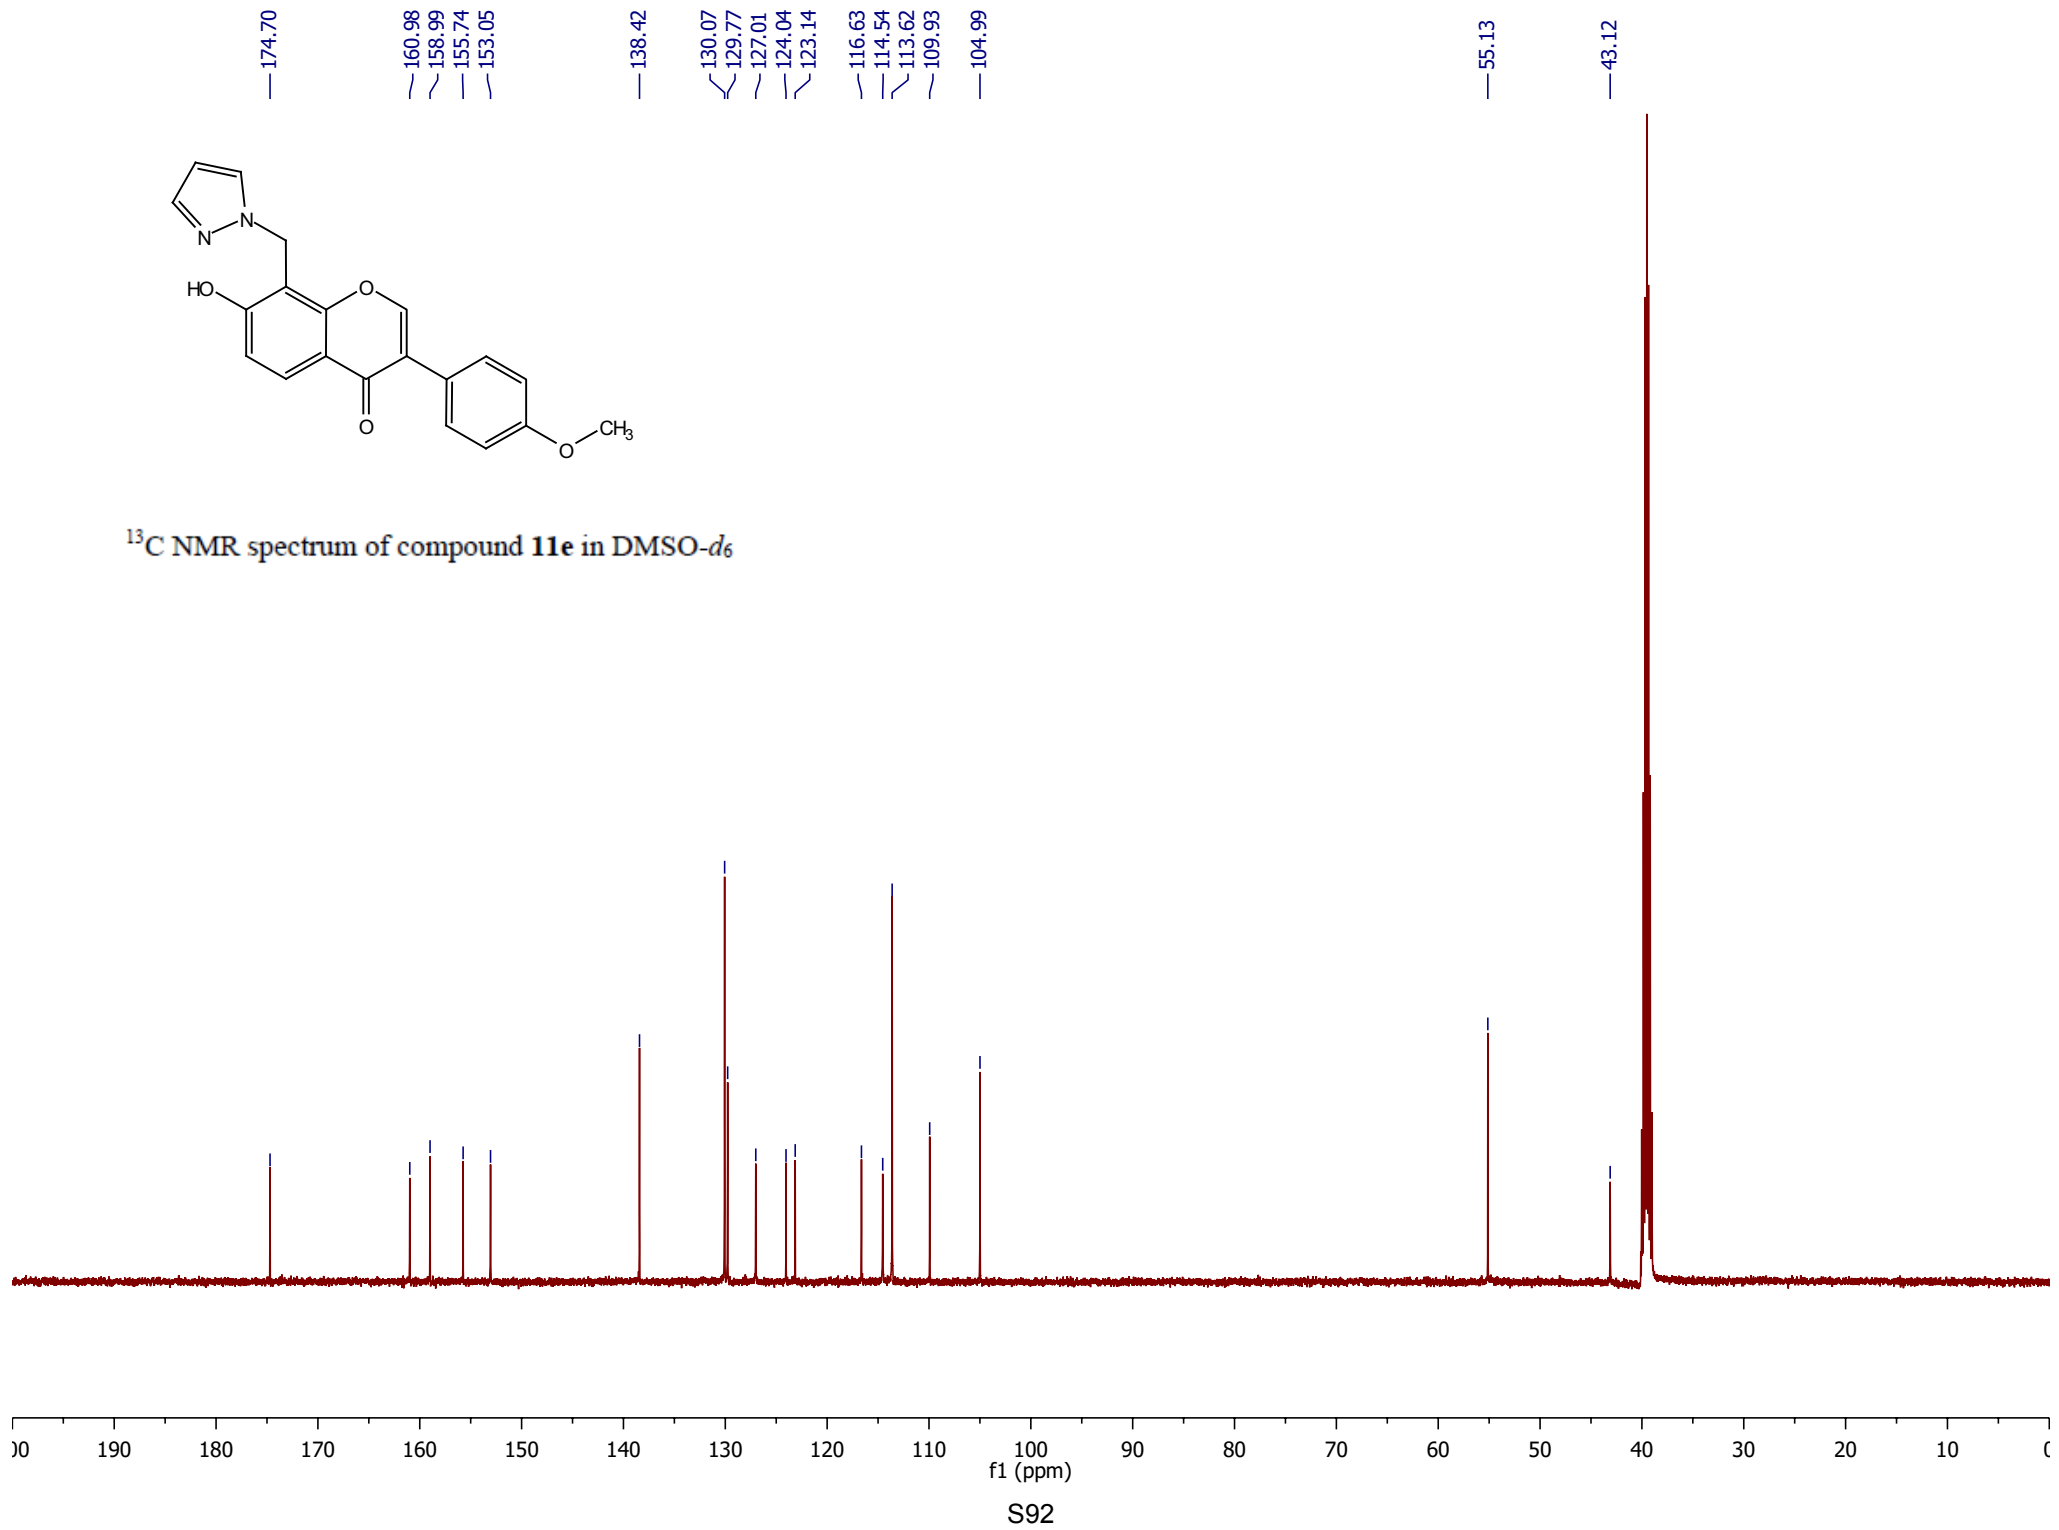

— 11.21

8.46  
8.45  
8.01  
7.99  
7.68  
7.68  
7.39  
7.39  
7.20  
7.19  
7.15  
7.15  
7.13  
7.13  
7.08  
7.06  
7.00  
6.98  
6.21  
6.20  
6.20  
5.48

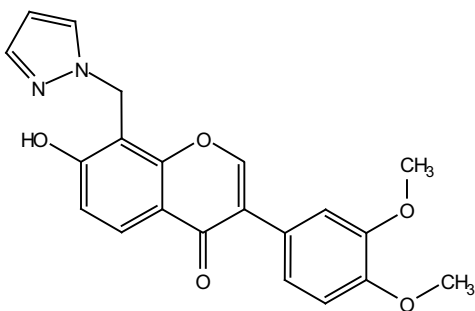

$^1\text{H}$  NMR spectrum of compound **11f** in  $\text{DMSO-}d_6$

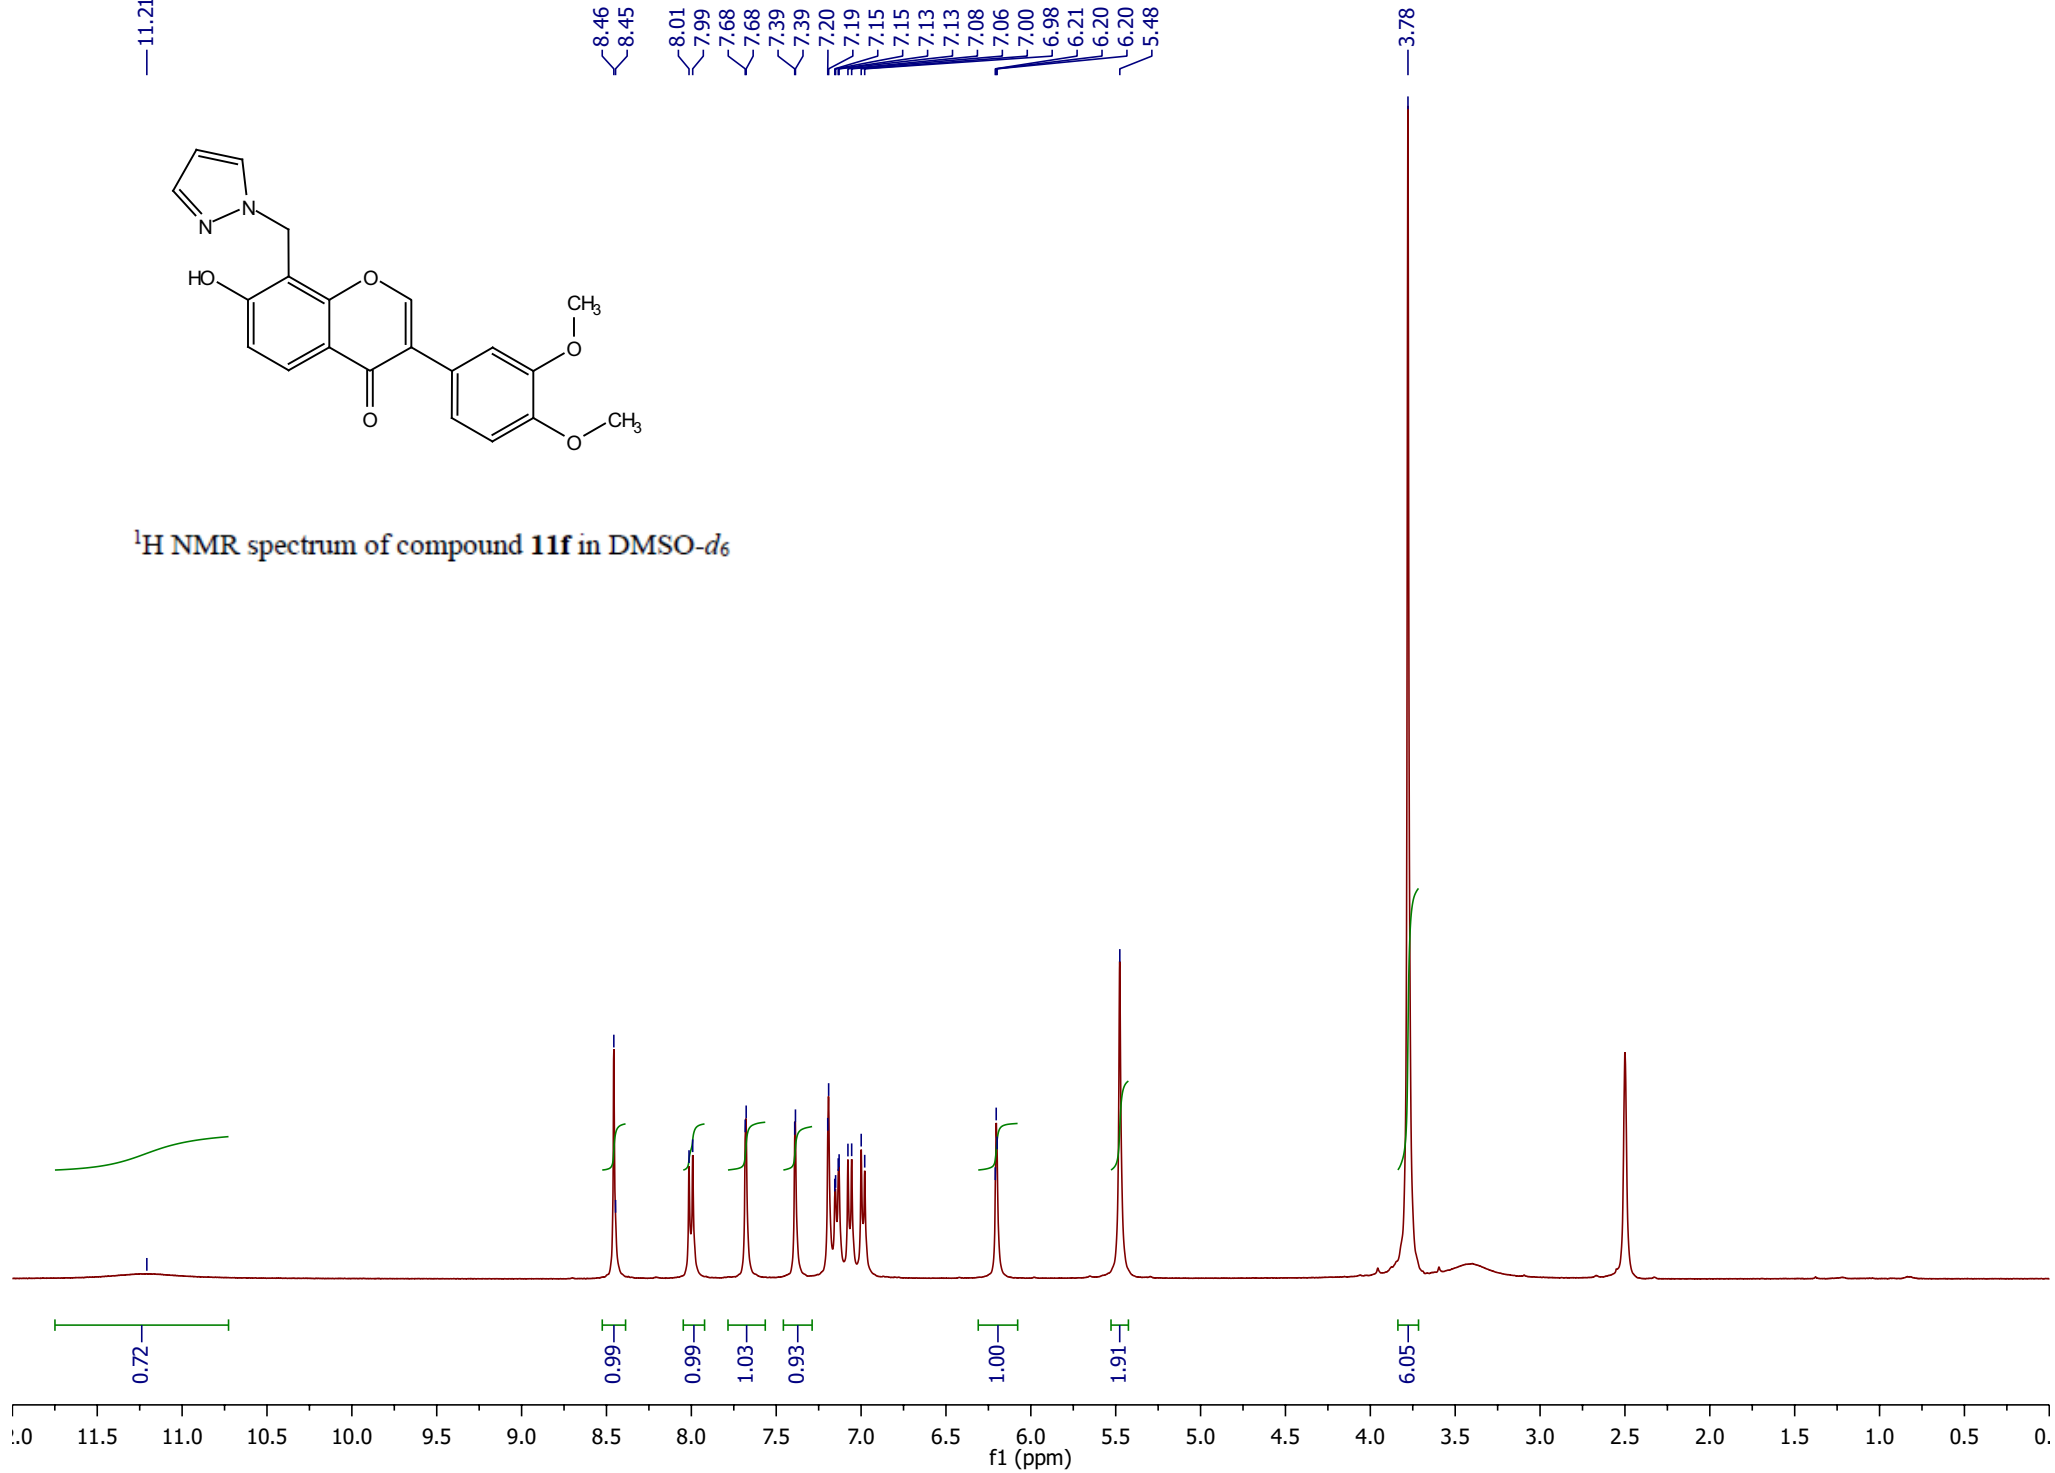

S93

— 174.68 — 161.02 — 155.69 — 153.28 — 148.63 — 148.31 — 138.43 — 129.75 — 127.02 — 124.35 — 123.20 — 121.25 — 116.63 — 114.58 — 112.69 — 111.54 — 109.92 — 105.02

55.54  
55.51

— 43.13

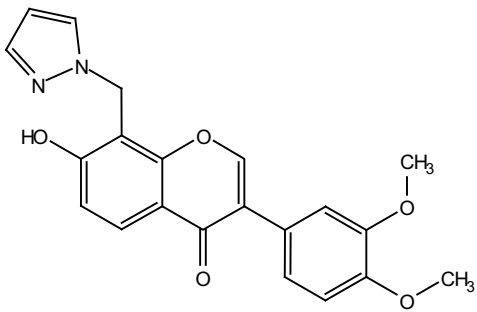

$^{13}\text{C}$  NMR spectrum of compound **11f** in  $\text{DMSO-}d_6$

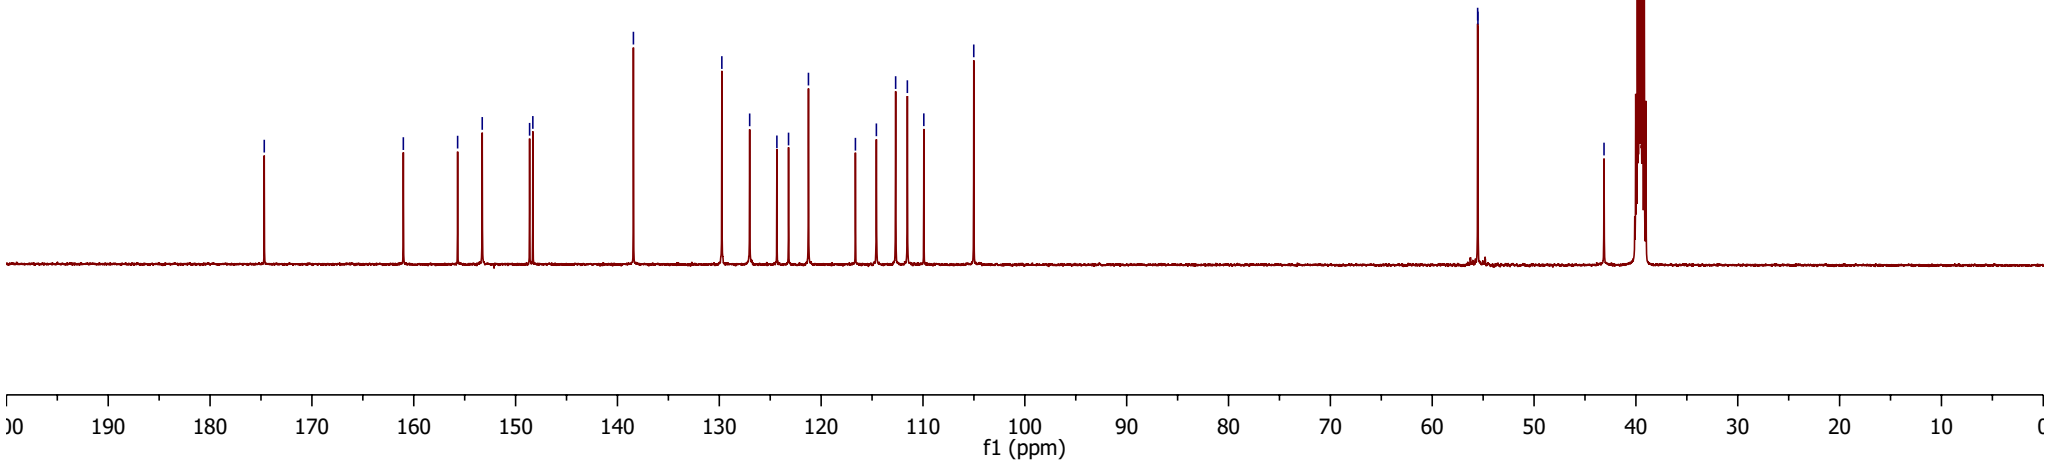

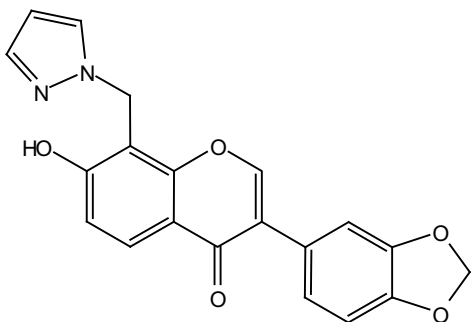

$^1\text{H}$  NMR spectrum of compound 11g in DMSO- $d_6$

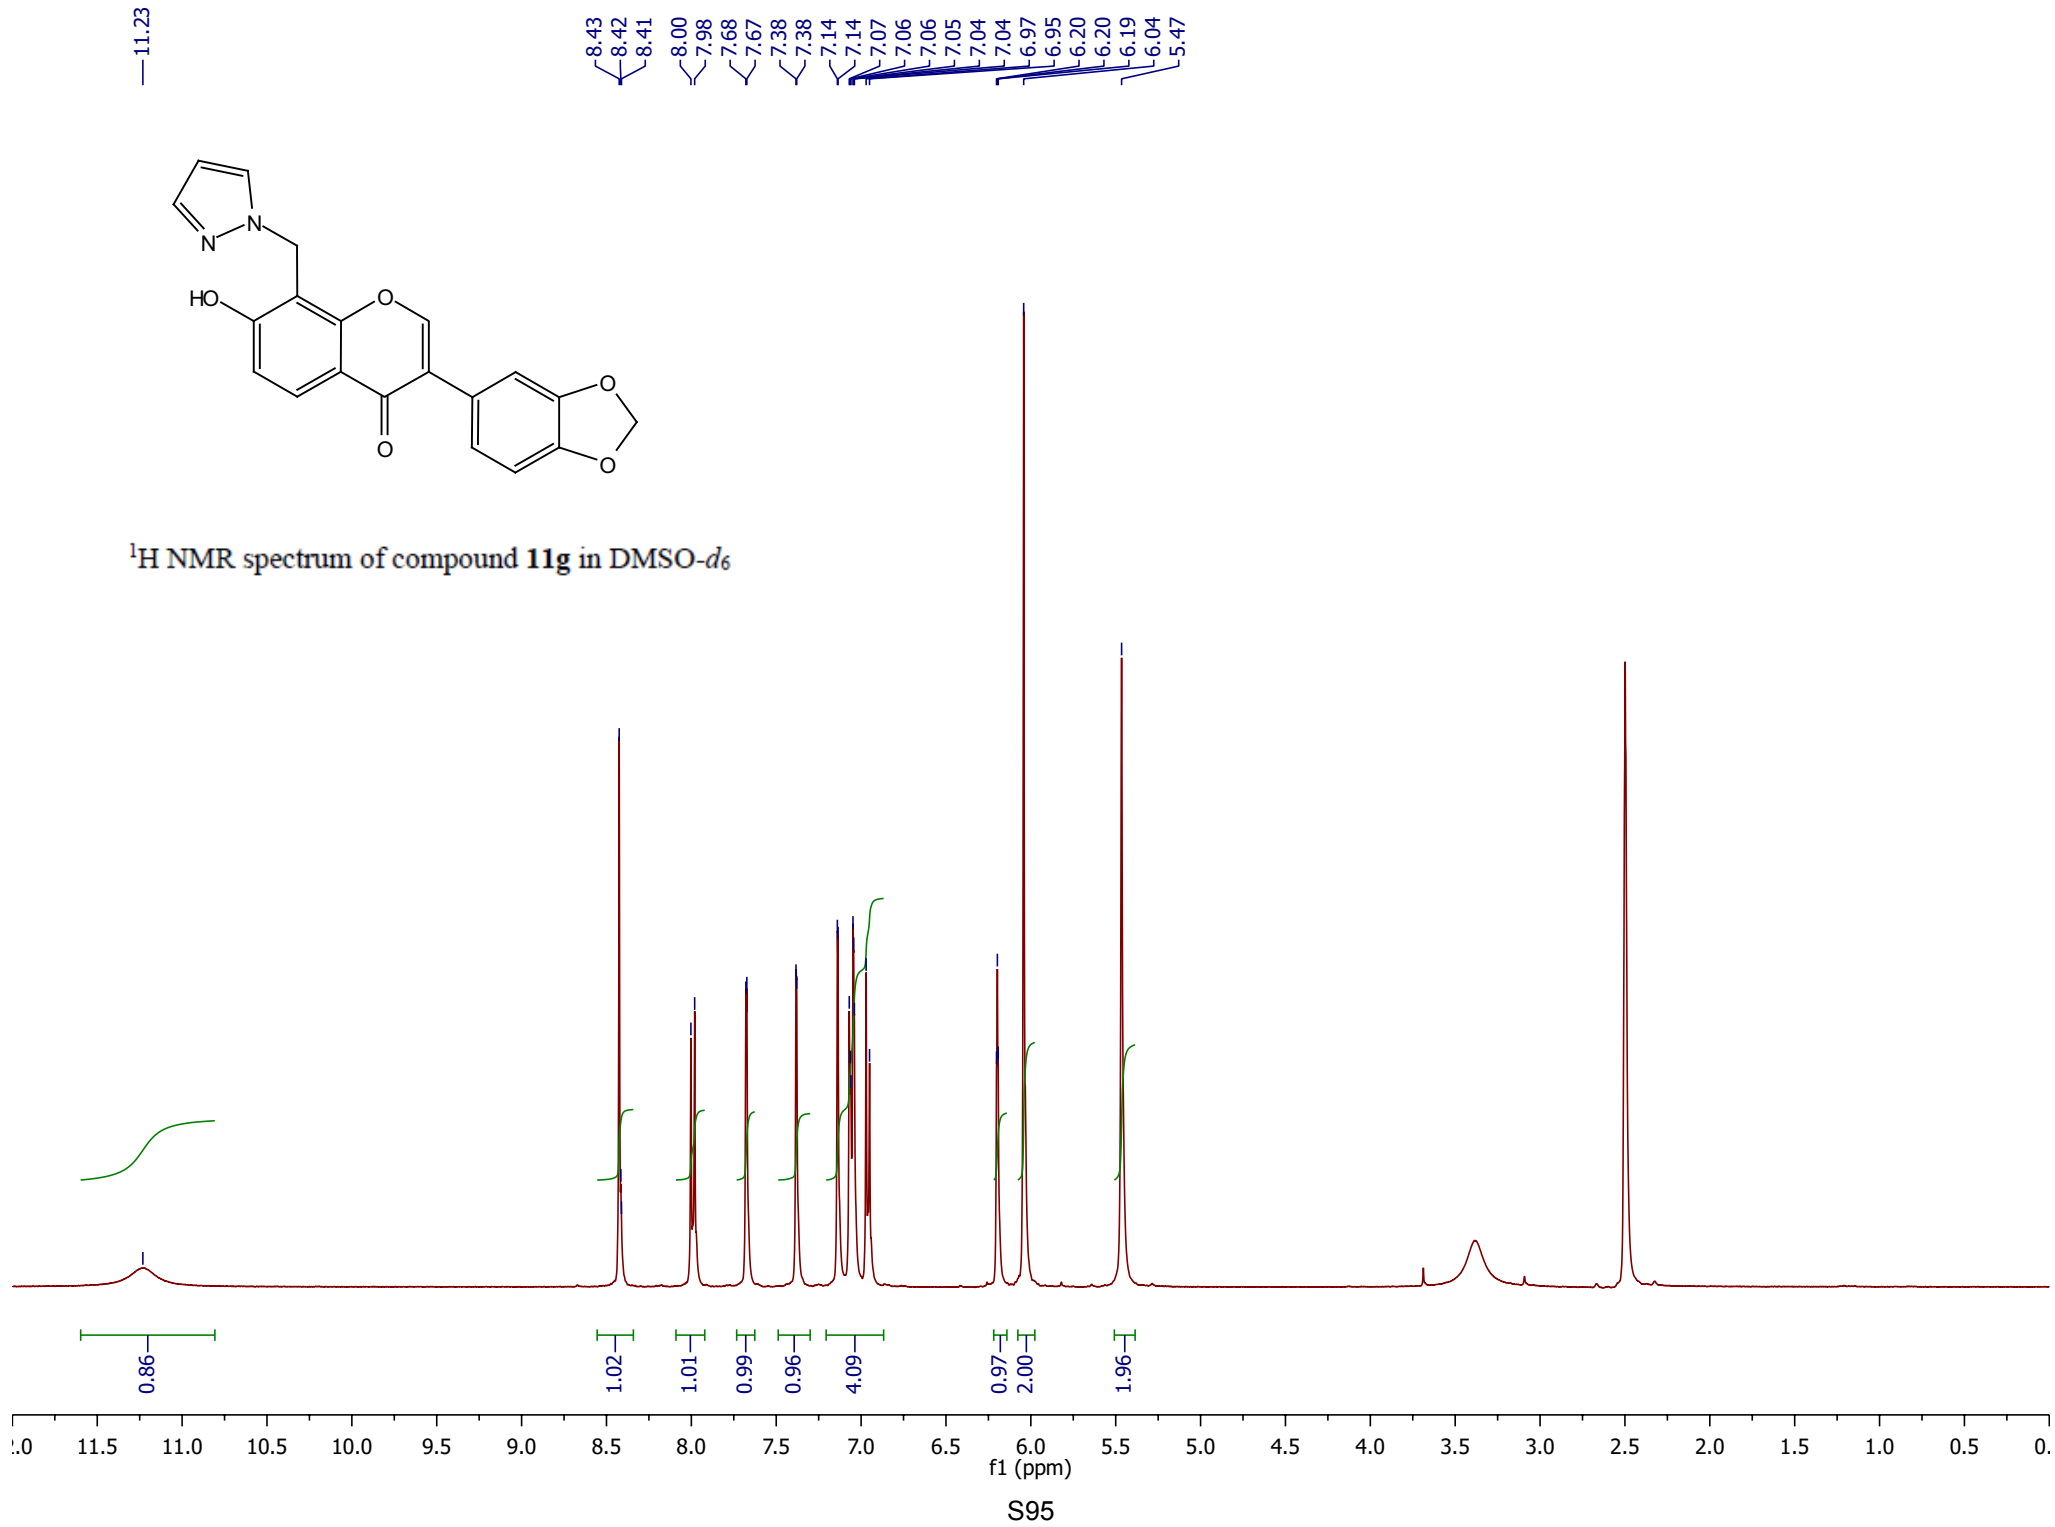

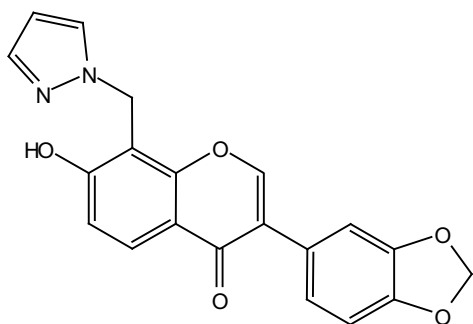

$^{13}\text{C}$  NMR spectrum of compound **11g** in  $\text{DMSO-}d_6$

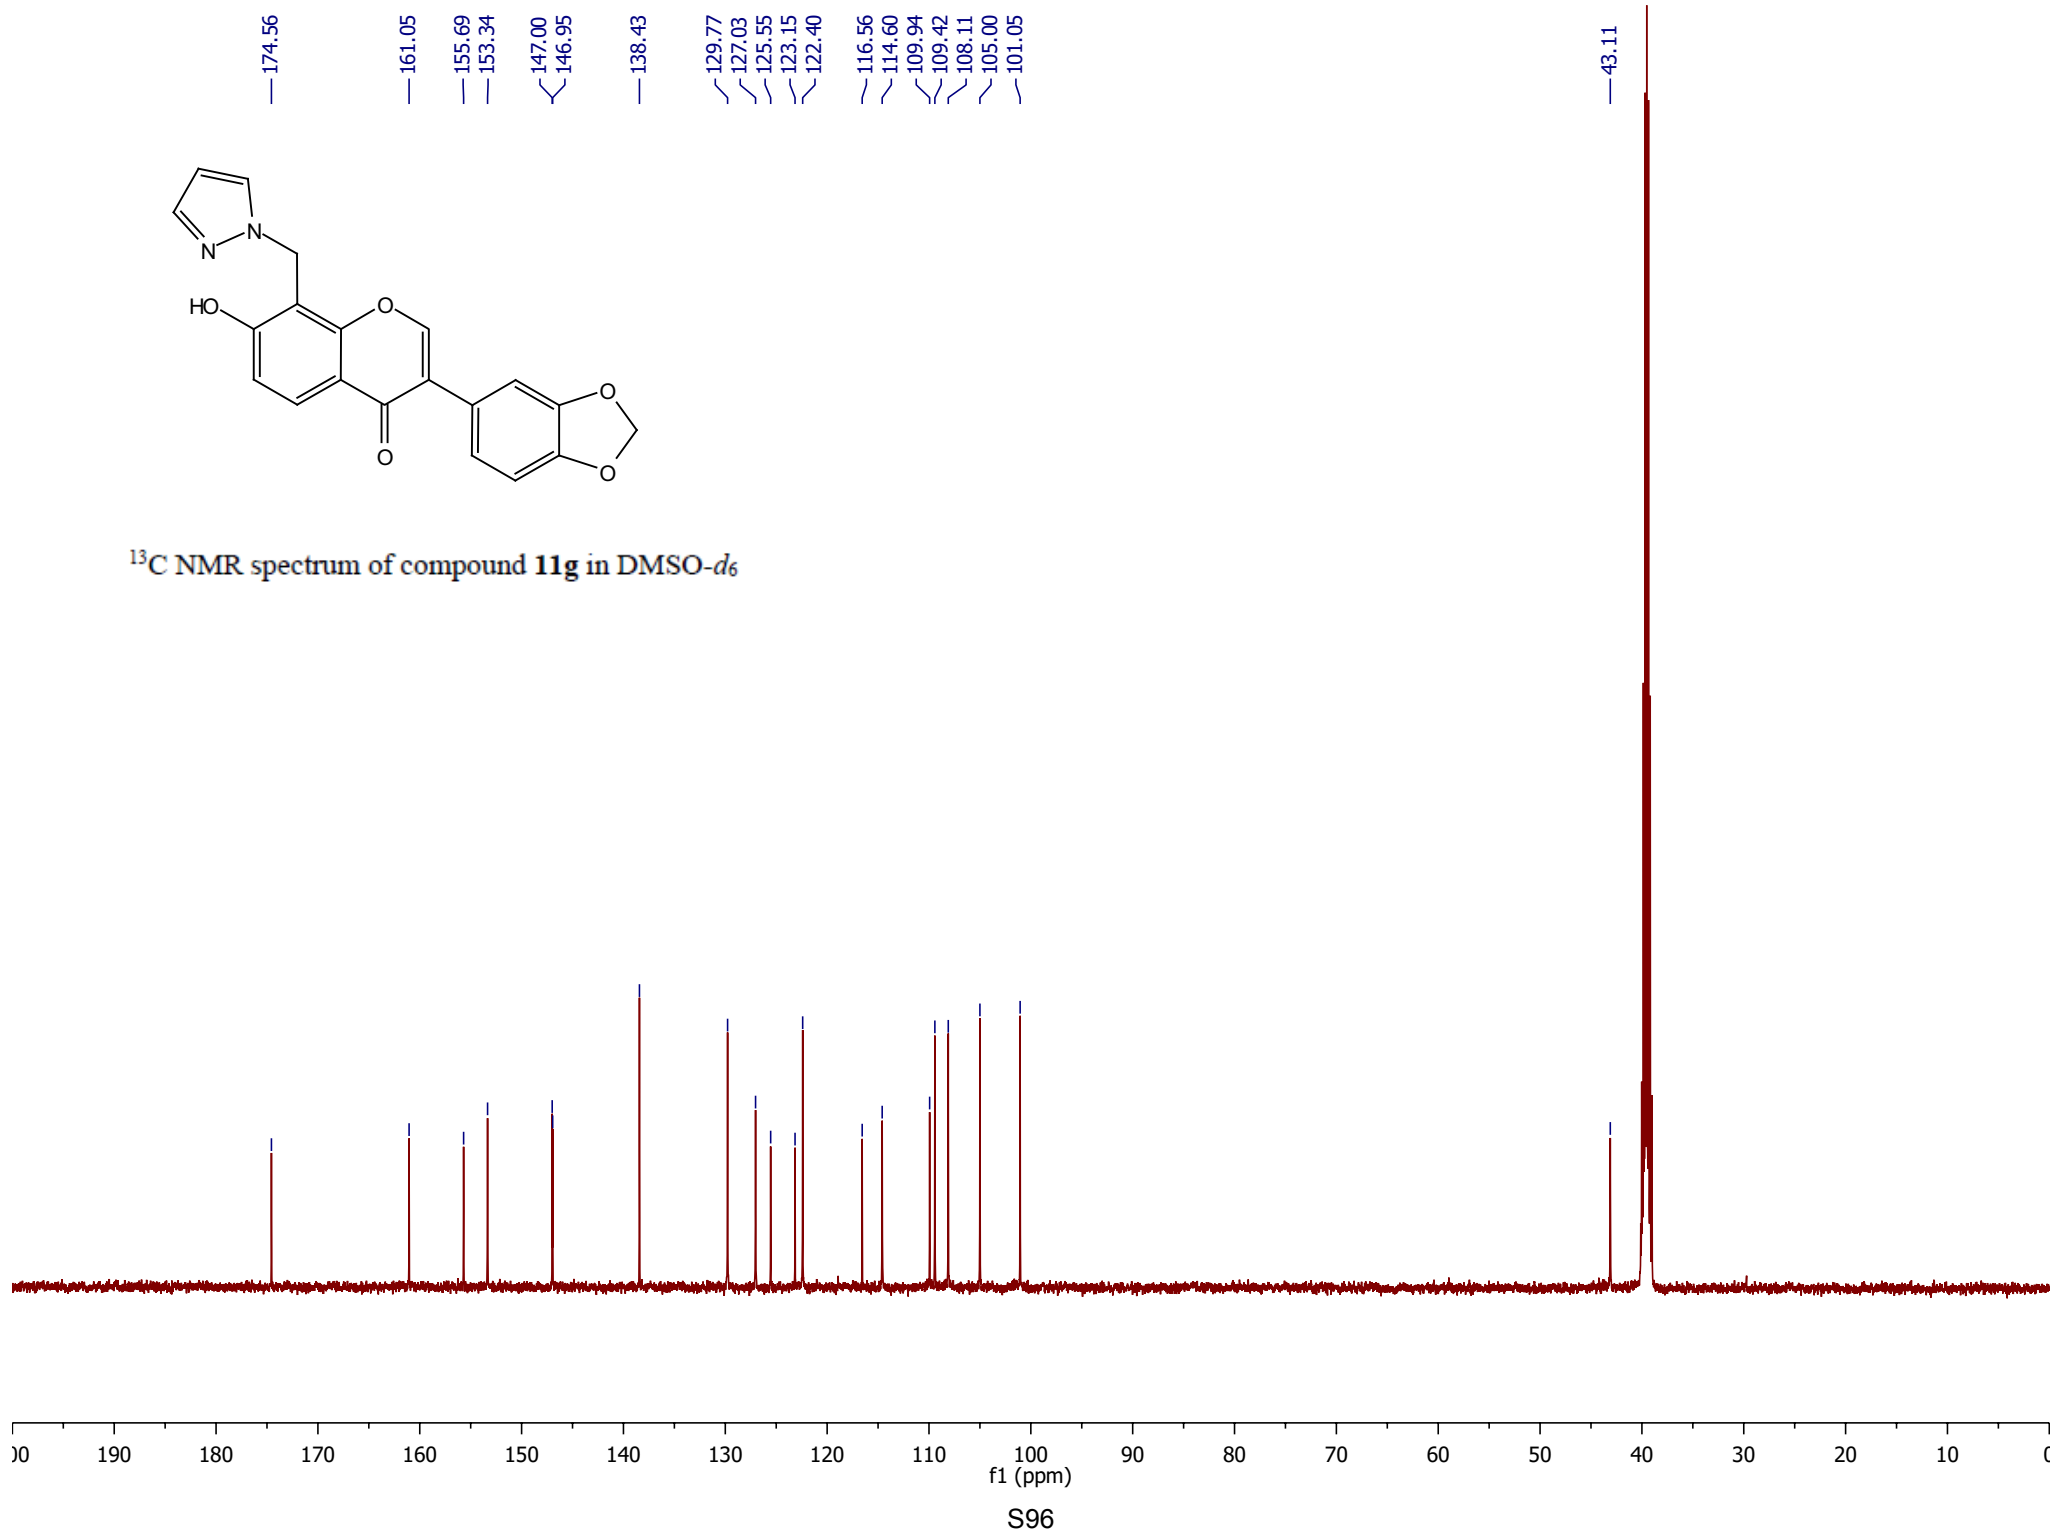



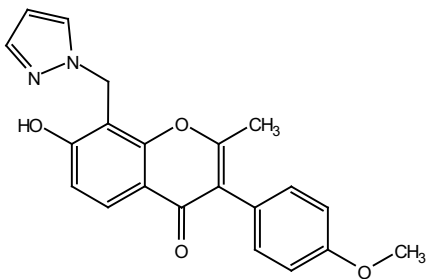

$^1\text{H}$  NMR spectrum of compound 11h in  $\text{DMSO-}d_6$

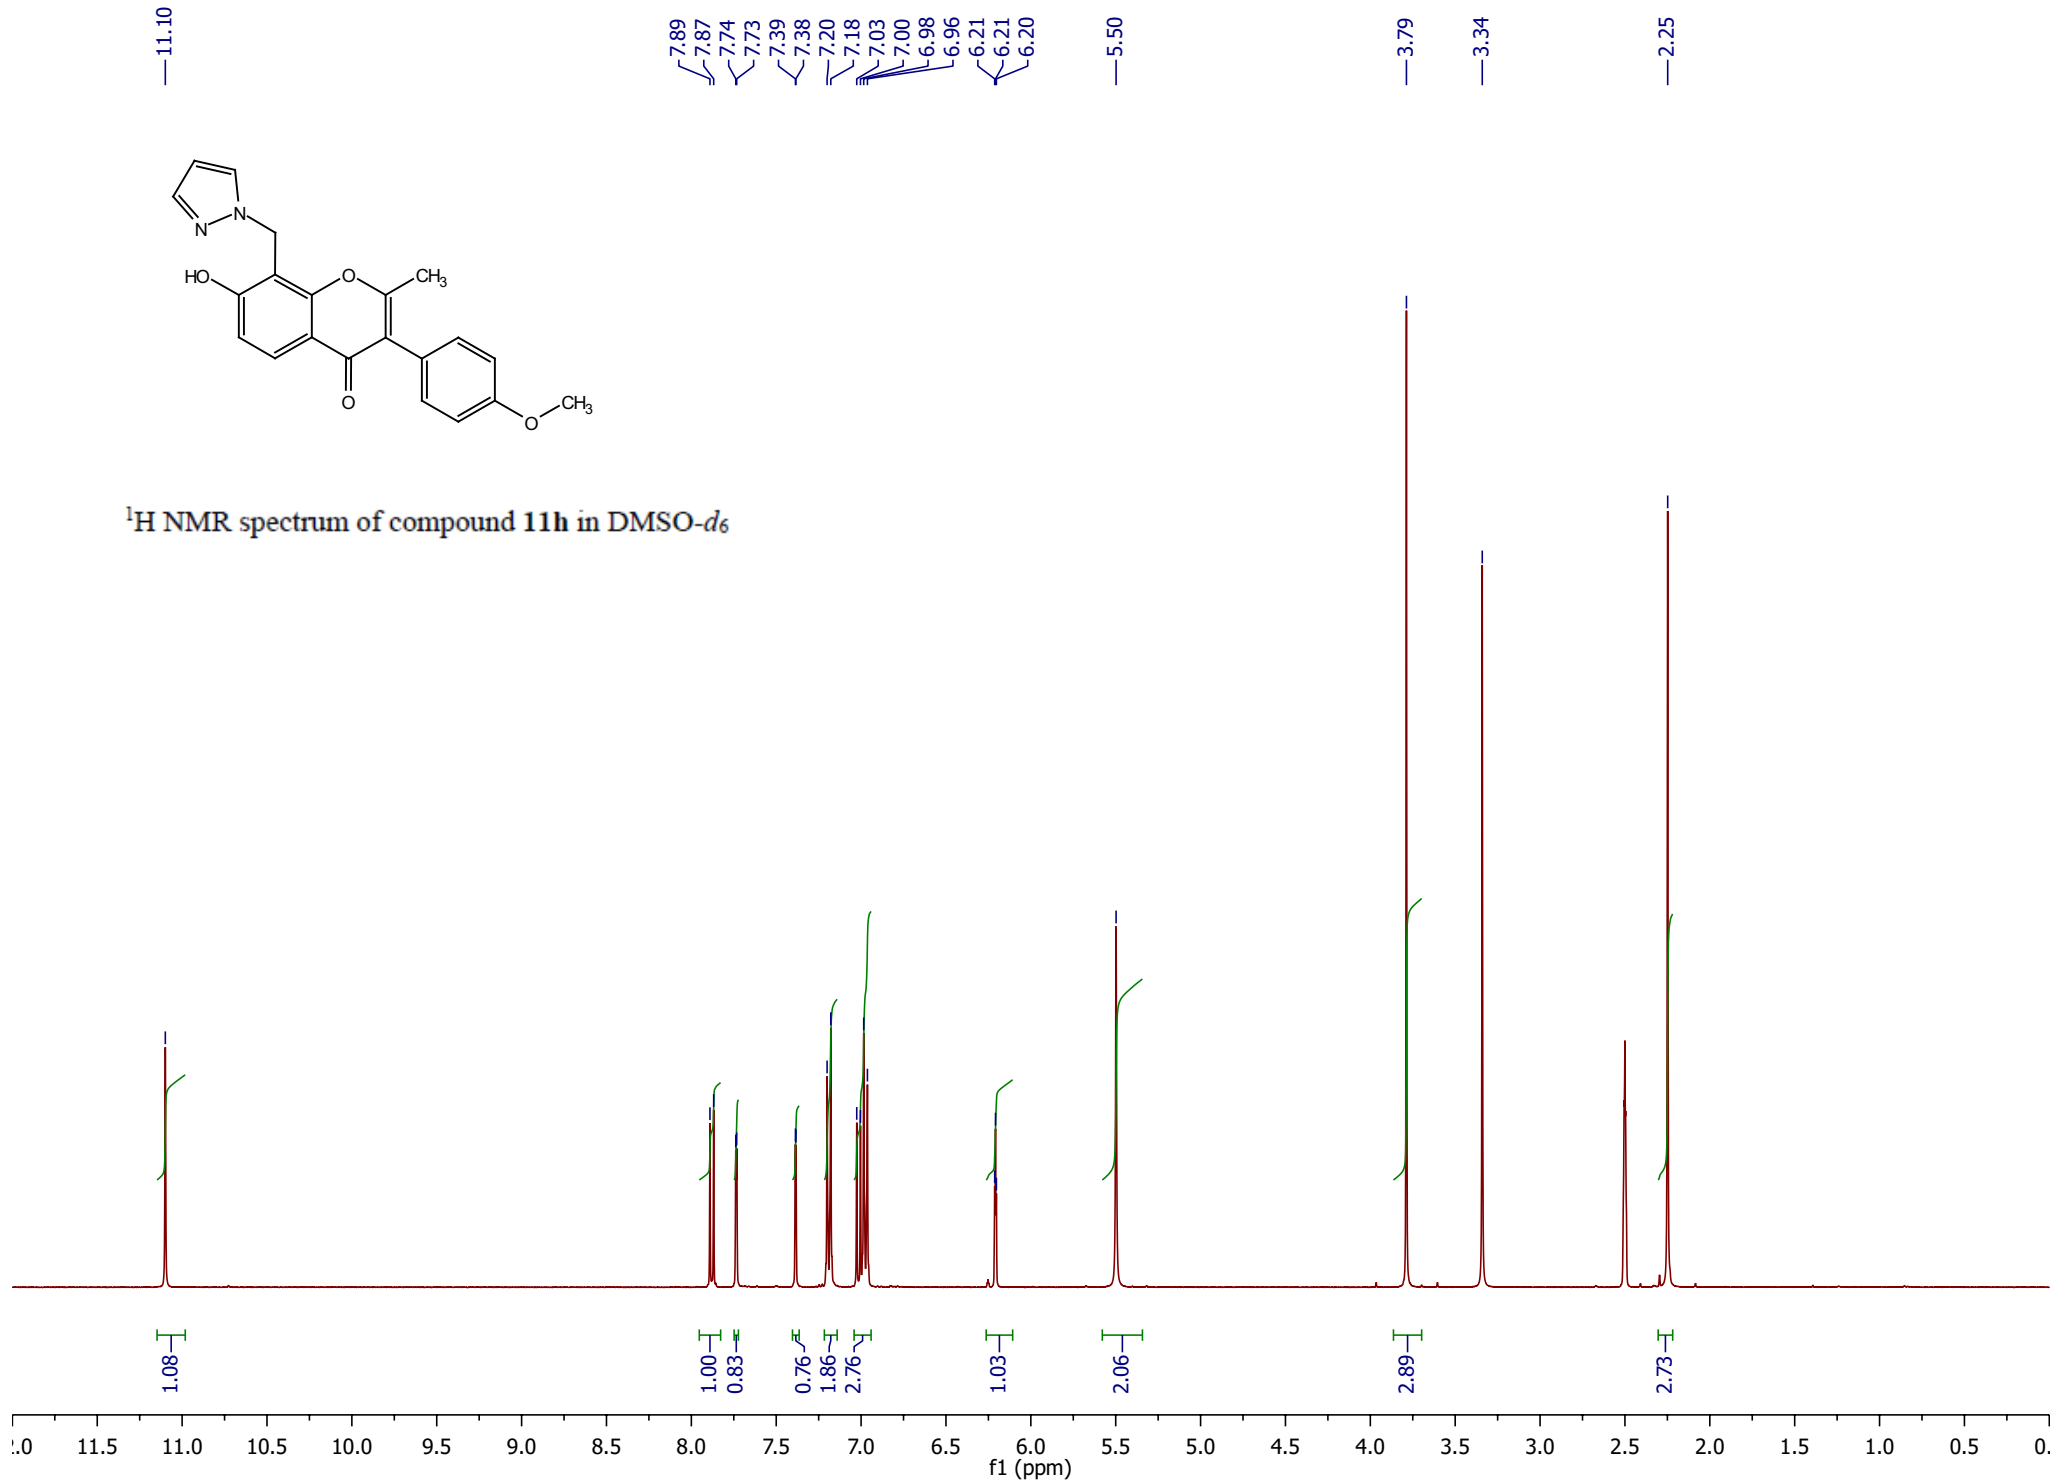

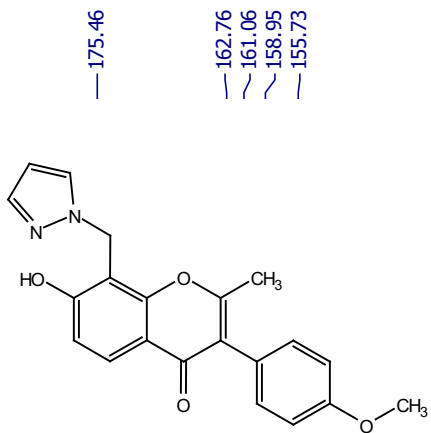

$^{13}\text{C}$  NMR spectrum of compound 11h in  $\text{DMSO-}d_6$

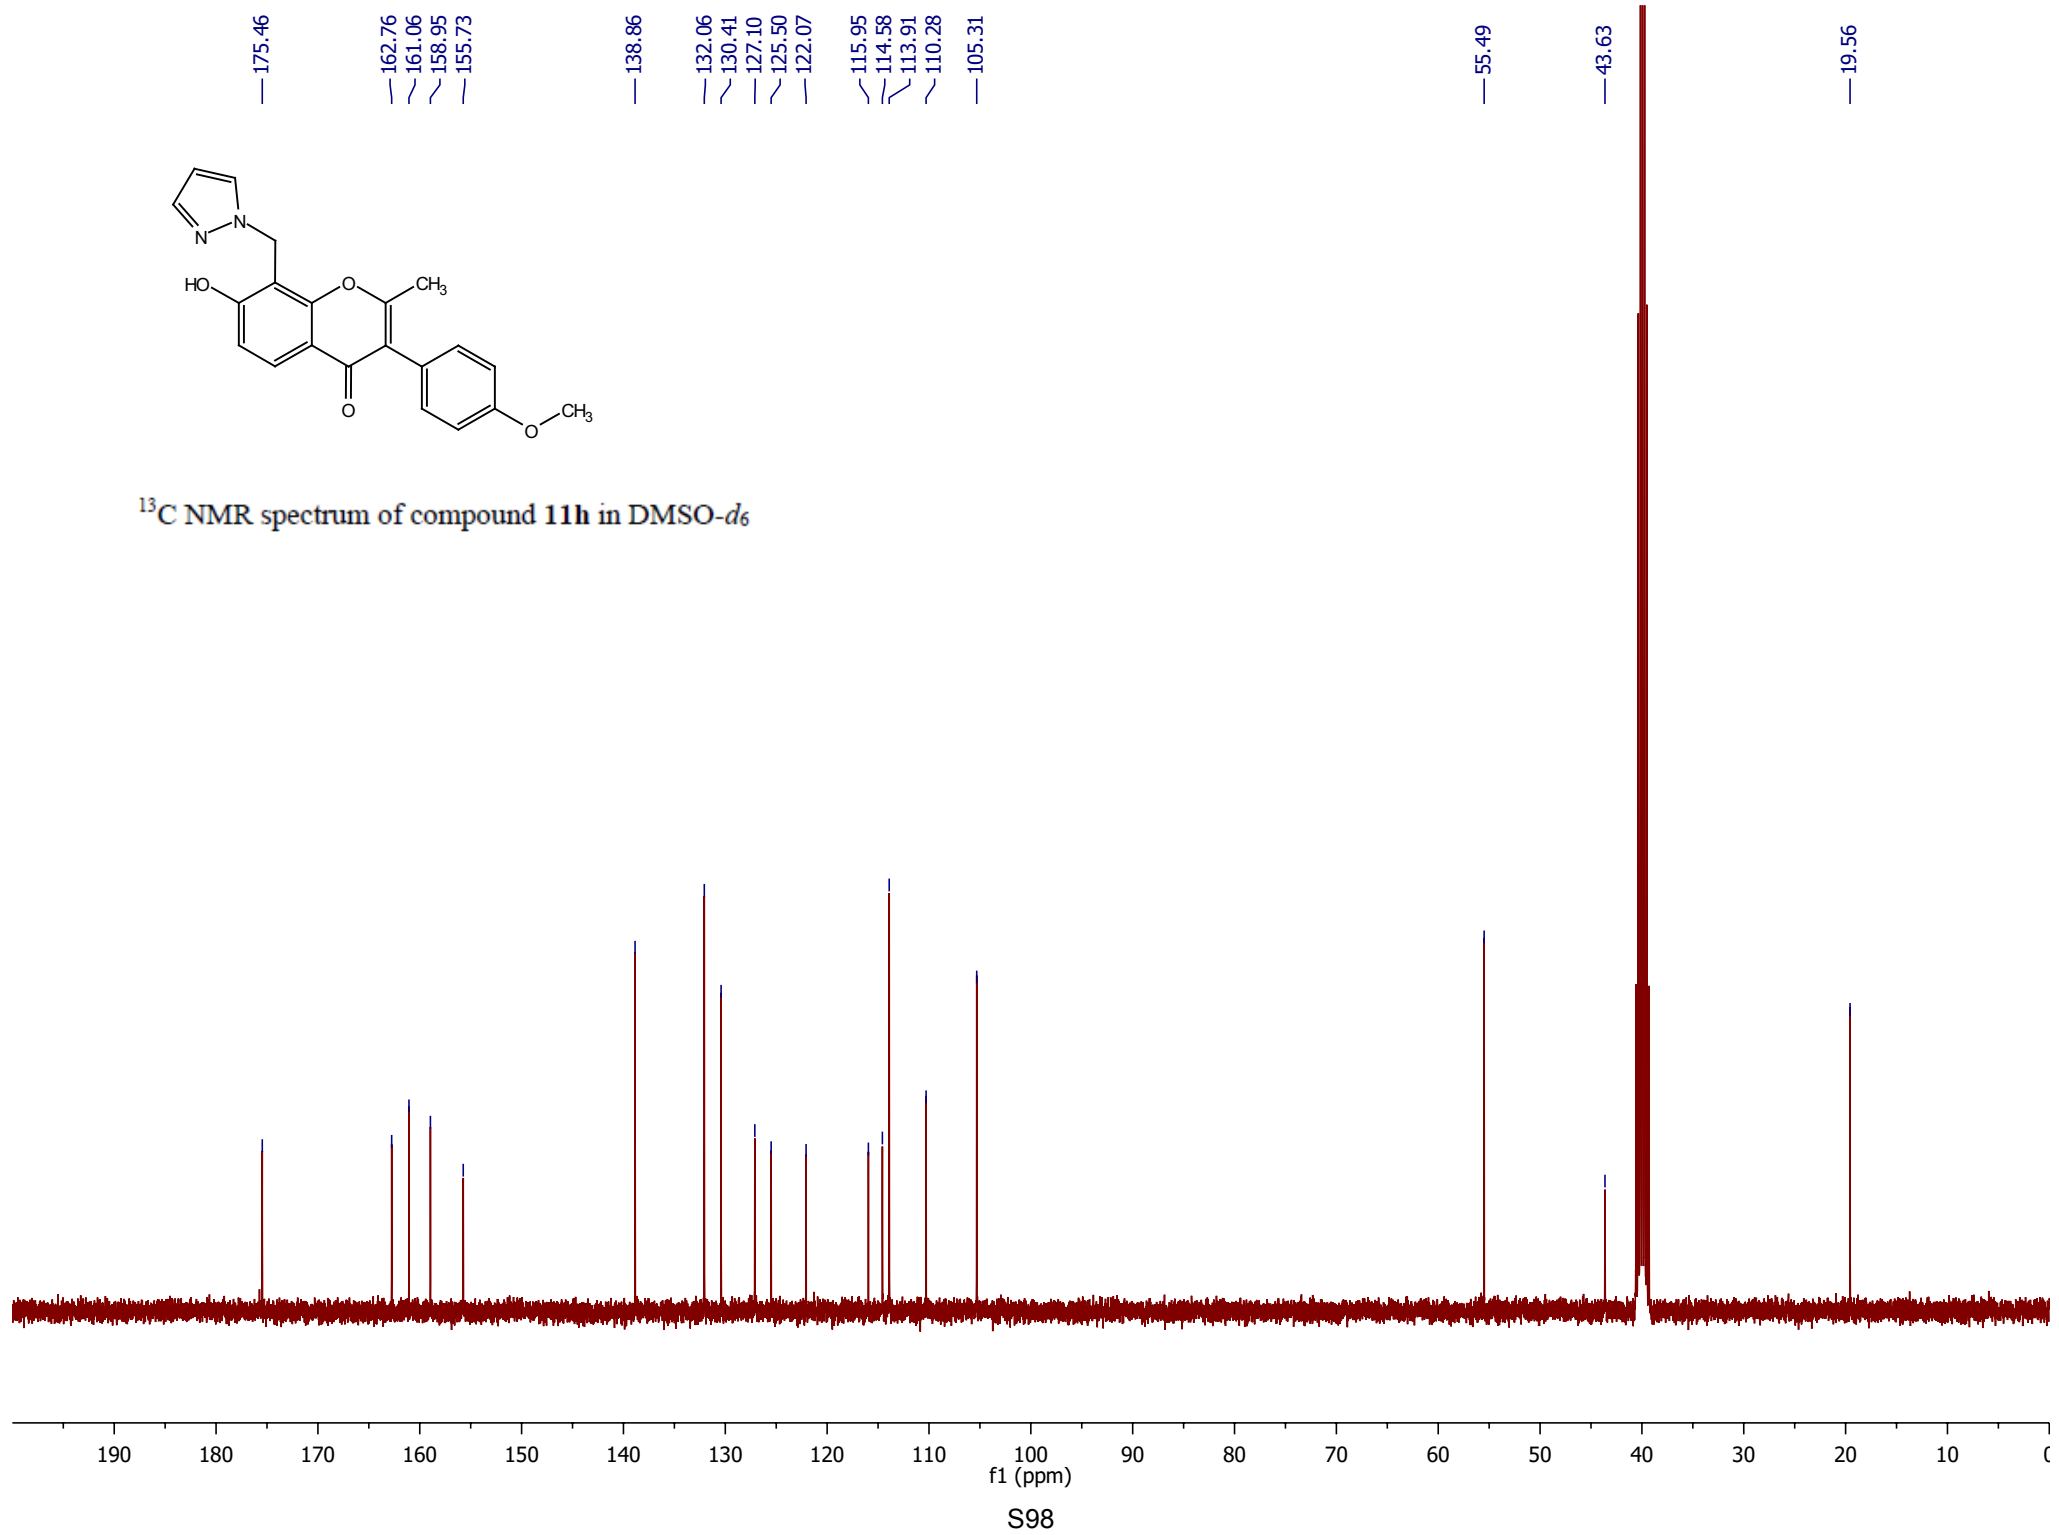

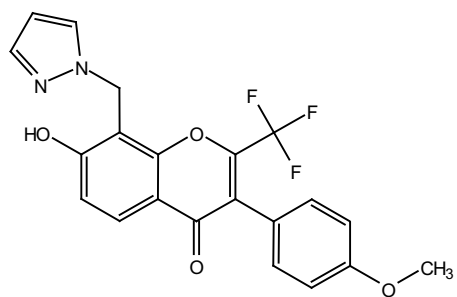

$^1\text{H}$  NMR spectrum of compound 11i in  $\text{DMSO-}d_6$

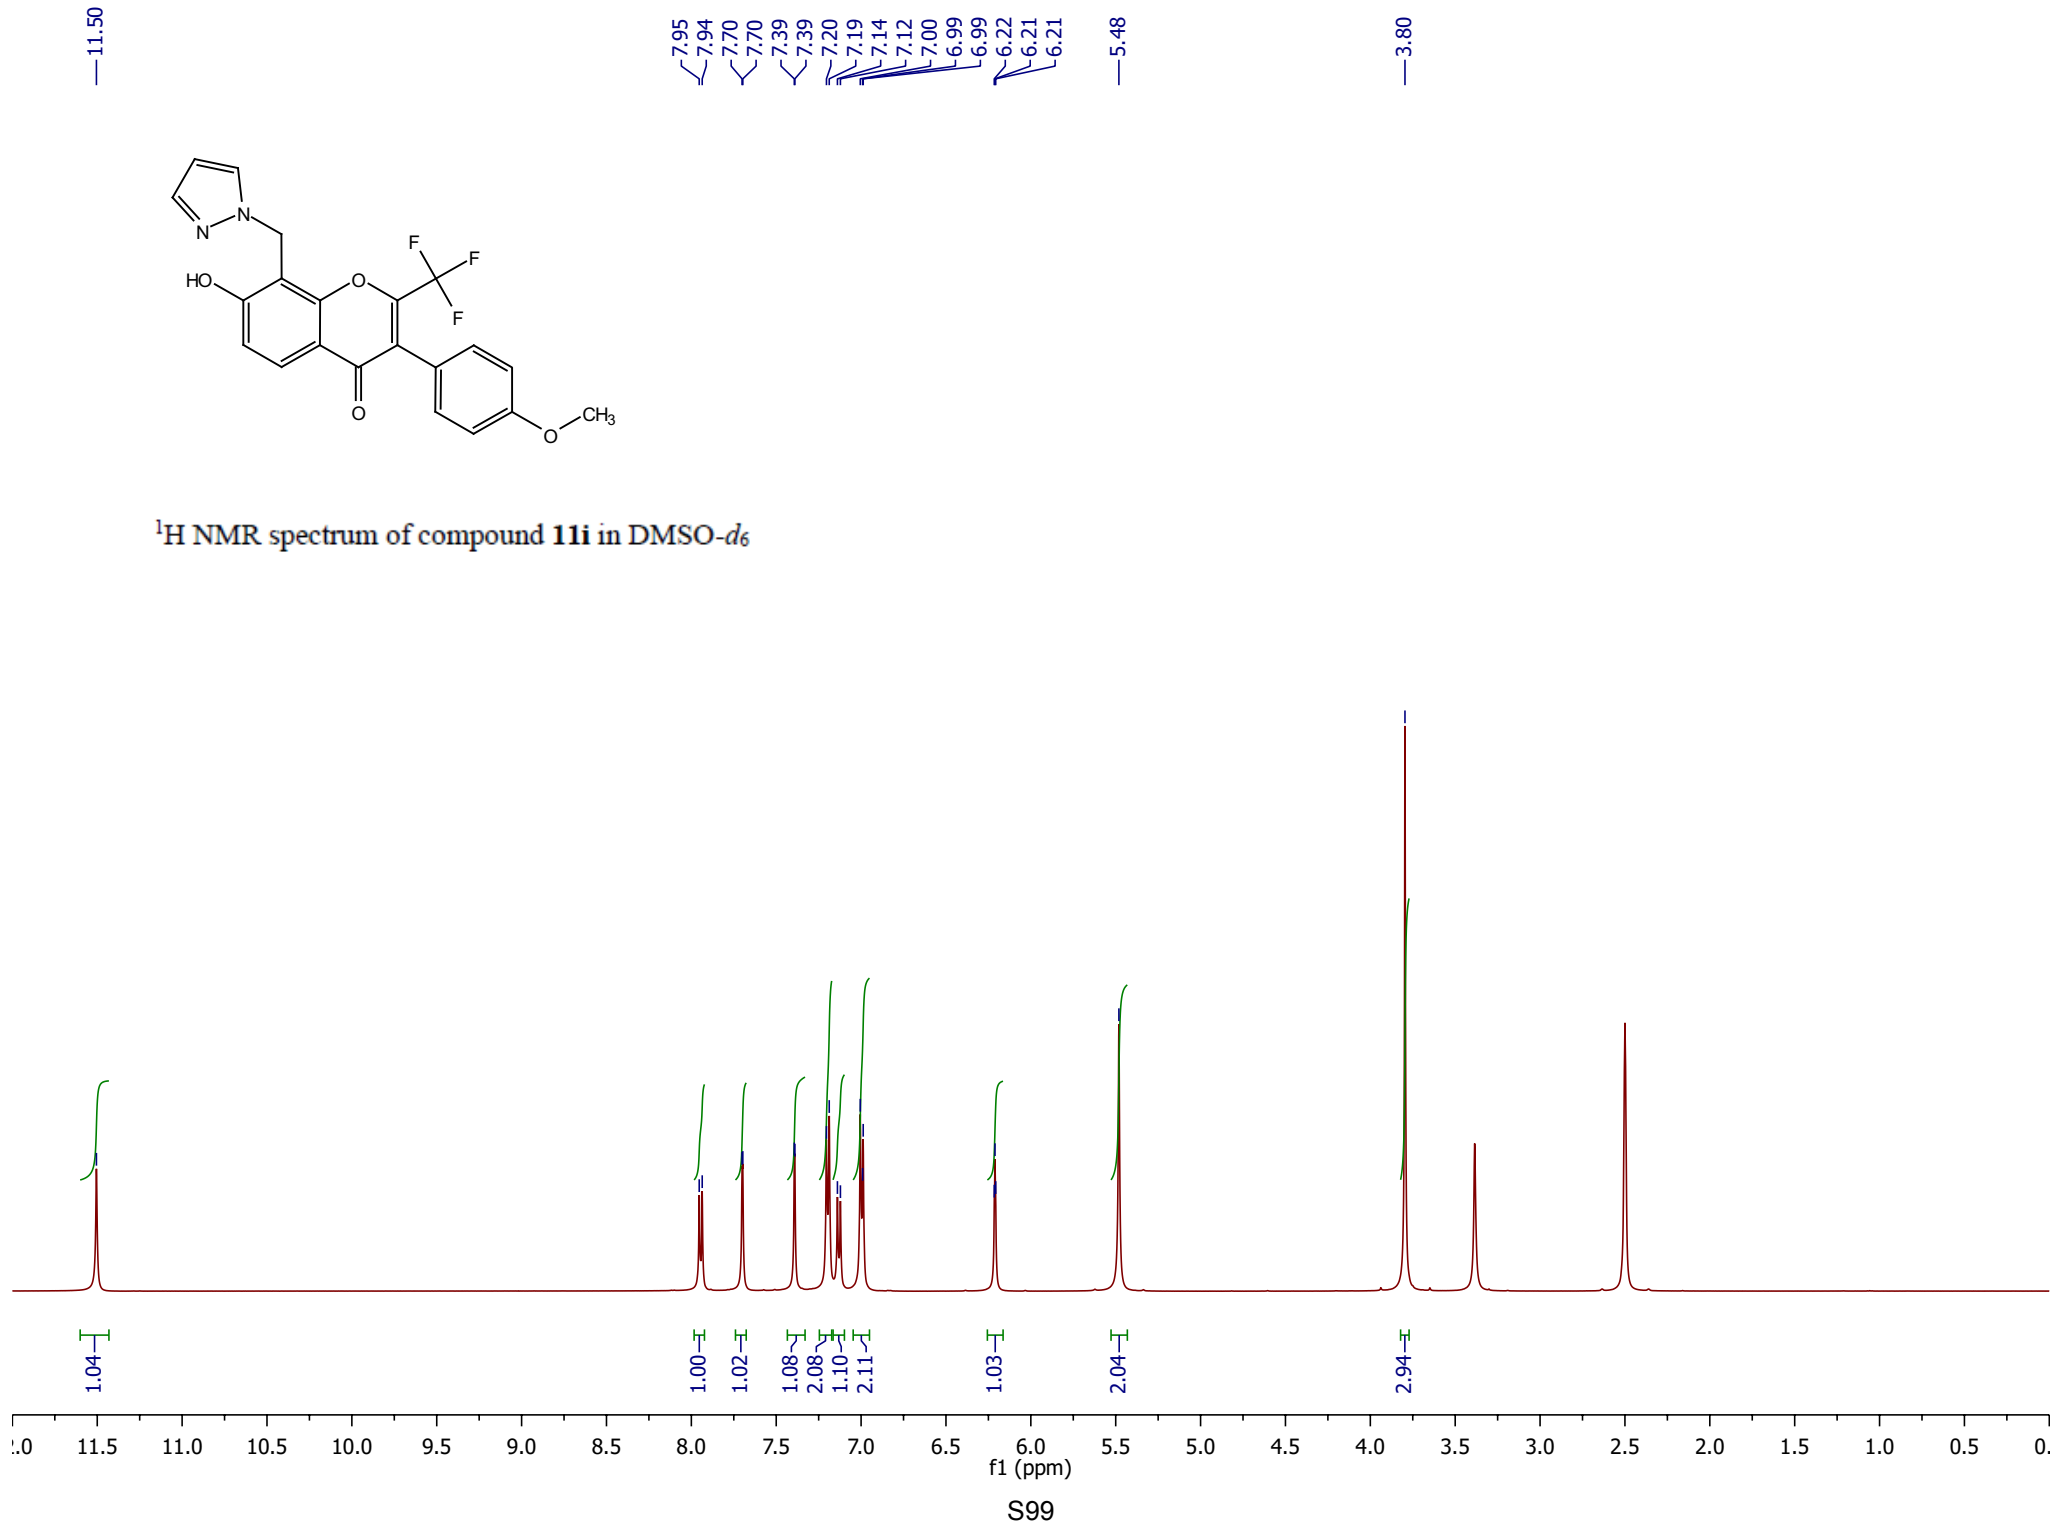

175.37  
162.09  
159.42  
154.71  
146.86  
146.58  
146.30  
146.03  
138.62  
131.16  
129.85  
127.07  
124.66  
122.74  
121.08  
120.54  
118.34  
116.14  
115.64  
115.40  
113.41  
110.31  
104.97

55.11

43.00

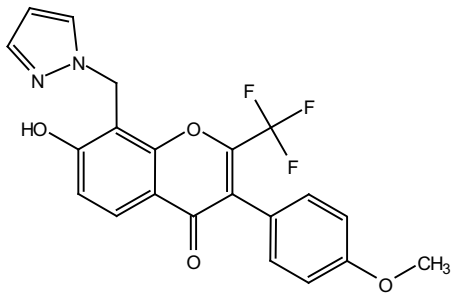

$^{13}\text{C}$  NMR spectrum of compound 11i in  $\text{DMSO-}d_6$

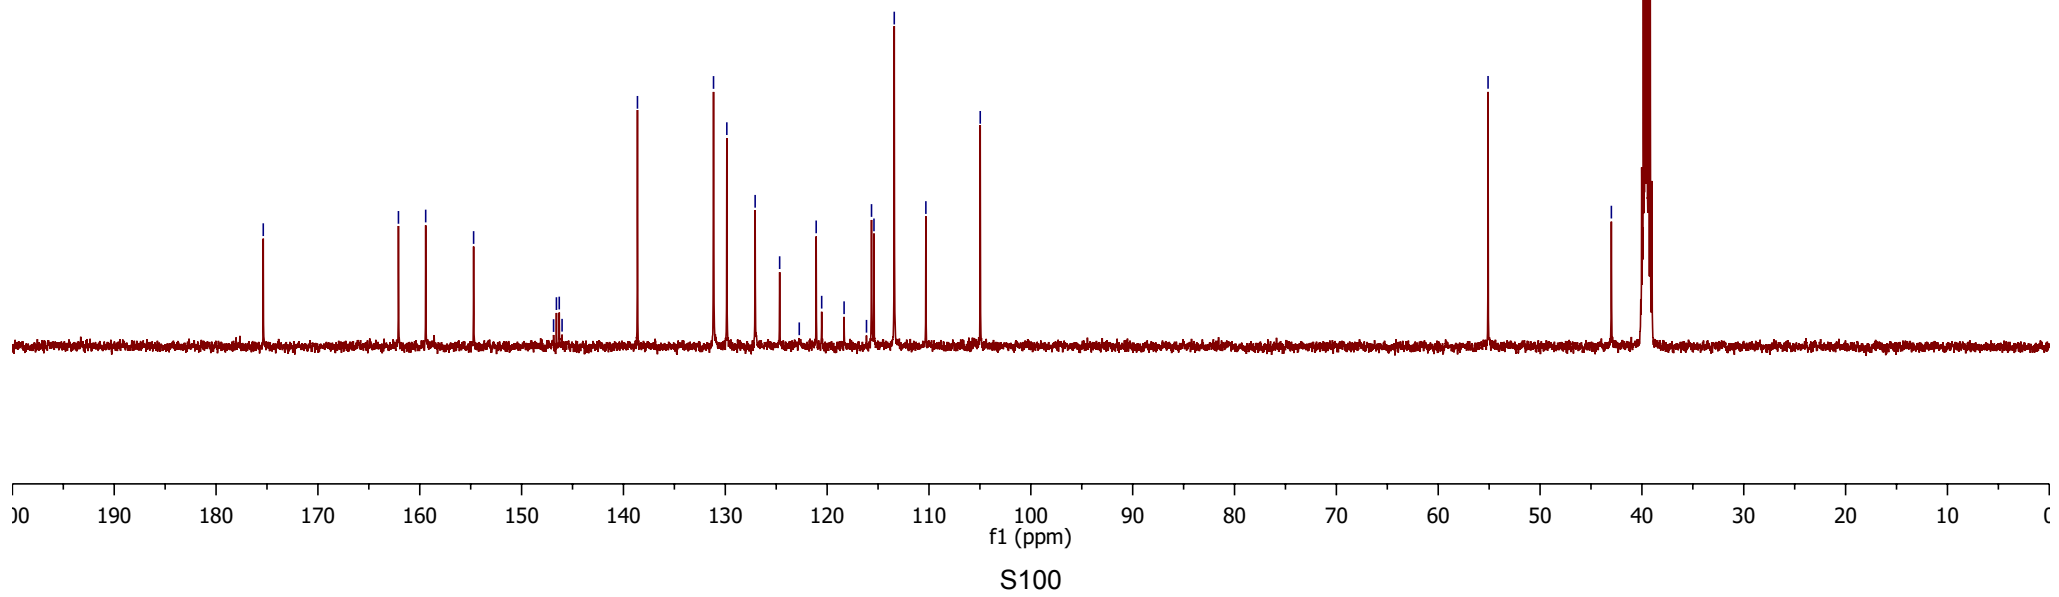

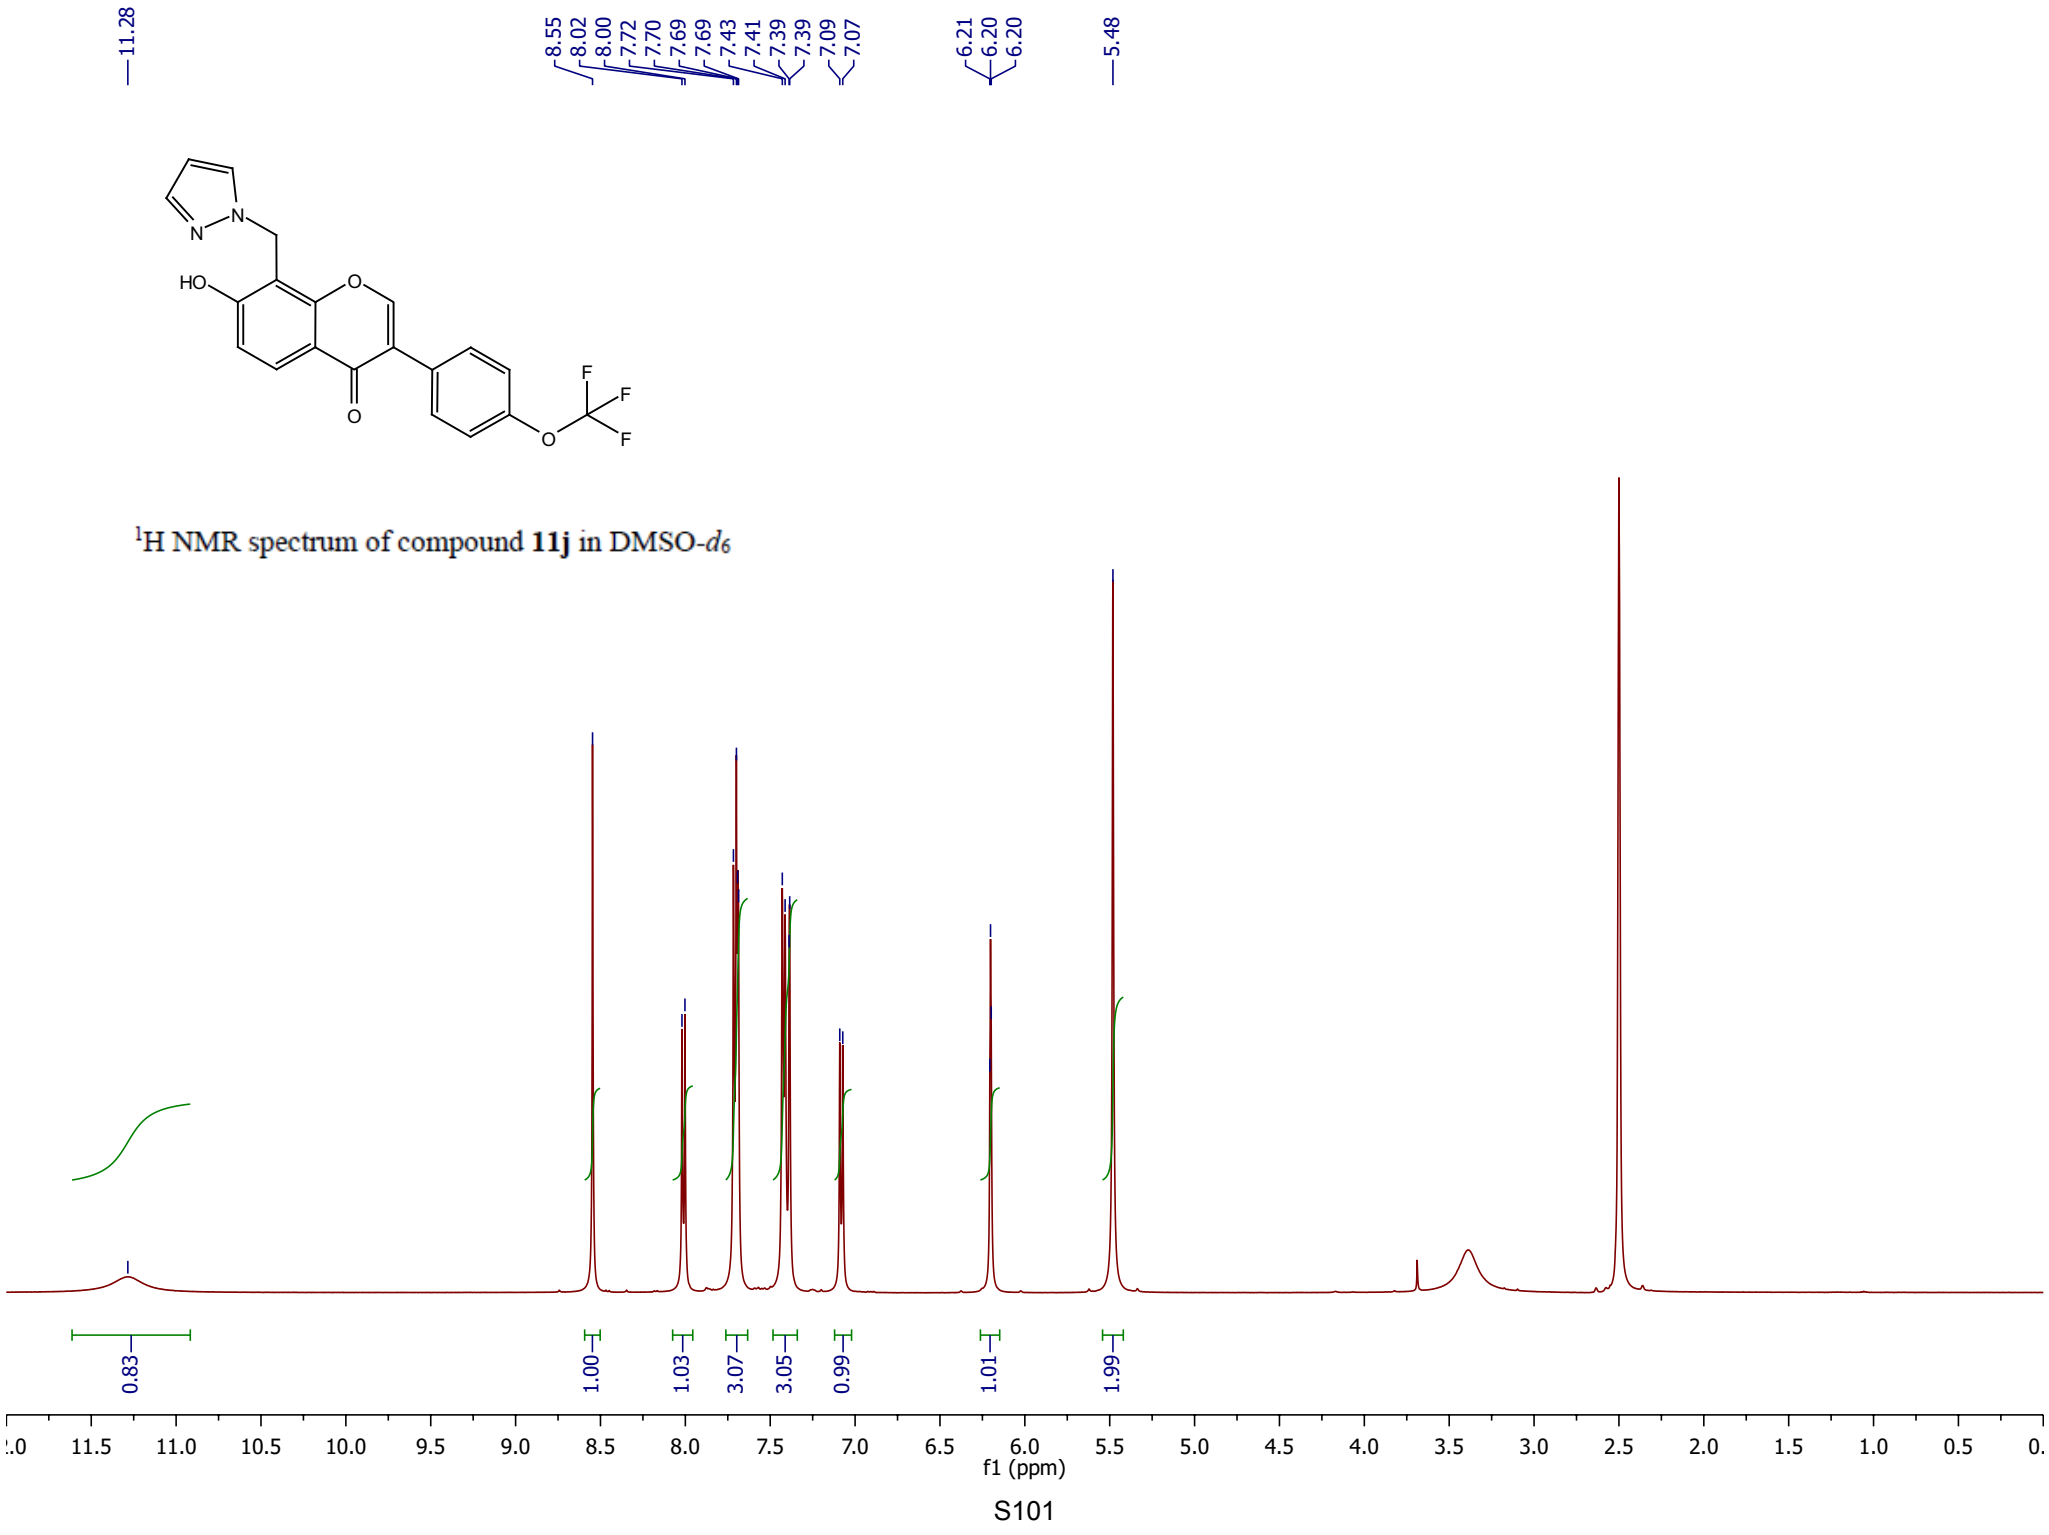

S101

174.32  
161.24  
155.80  
154.17  
147.93  
138.45  
131.32  
130.85  
129.80  
127.02  
123.19  
122.28  
121.15  
120.74  
119.11  
117.07  
116.53  
114.76  
110.07  
105.01

43.10

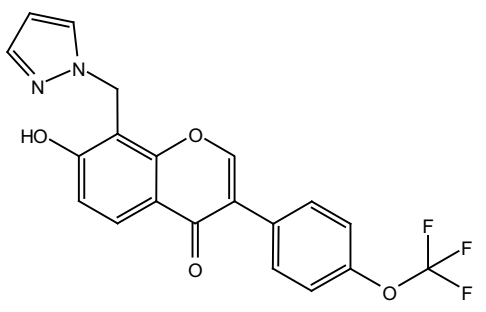

<sup>13</sup>C NMR spectrum of compound **11j** in DMSO-*d*<sub>6</sub>

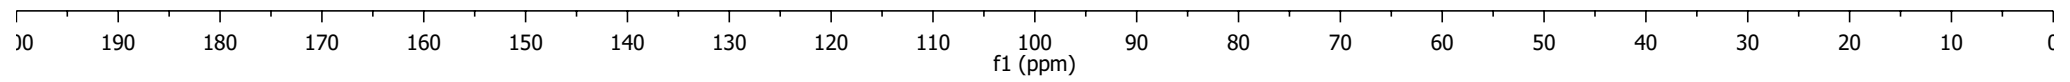

— 10.94

7.92  
7.89

7.48  
7.46

6.84  
6.82

6.20  
6.18

— 5.71

— 5.14

— 2.38

— 1.95

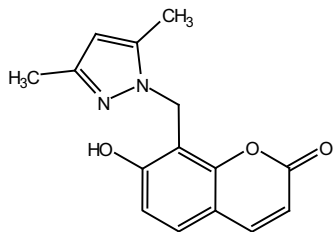

<sup>1</sup>H NMR spectrum of compound 12a in DMSO-*d*<sub>6</sub>

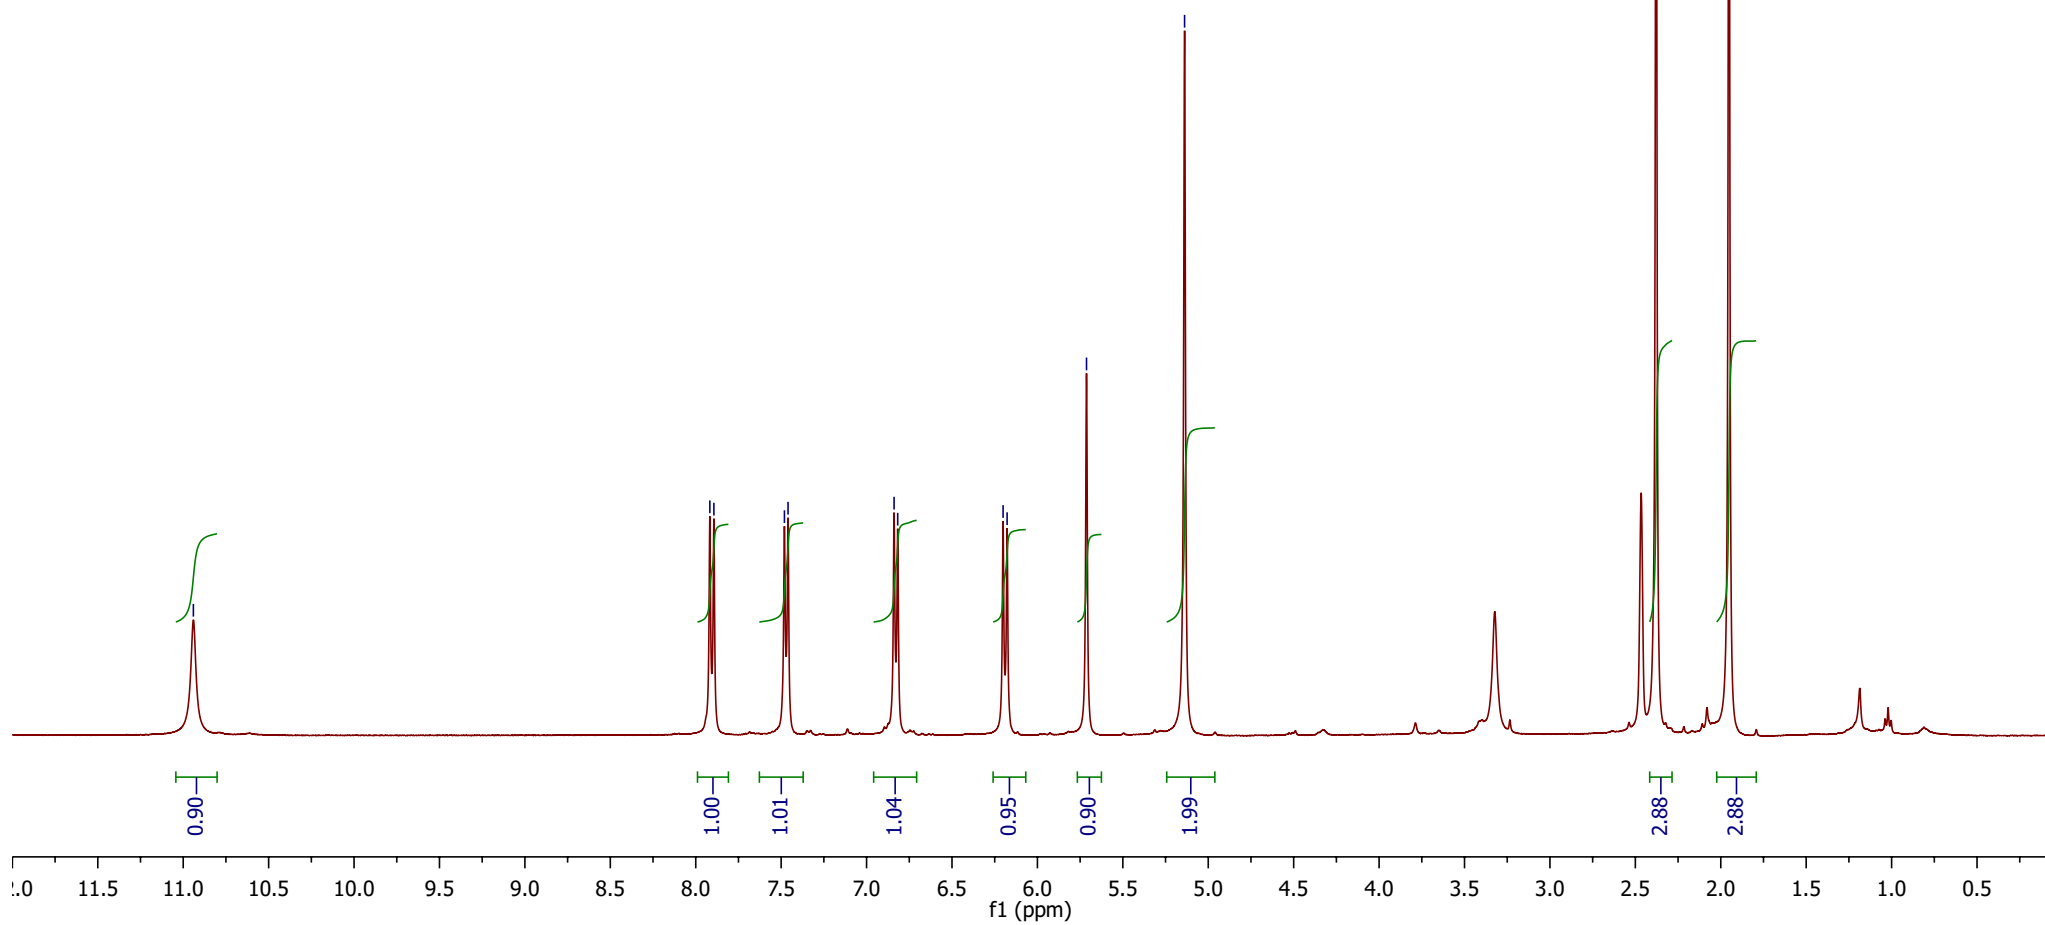

S103



$^{13}\text{C}$  NMR spectrum of compound **12a** in  $\text{DMSO-}d_6$

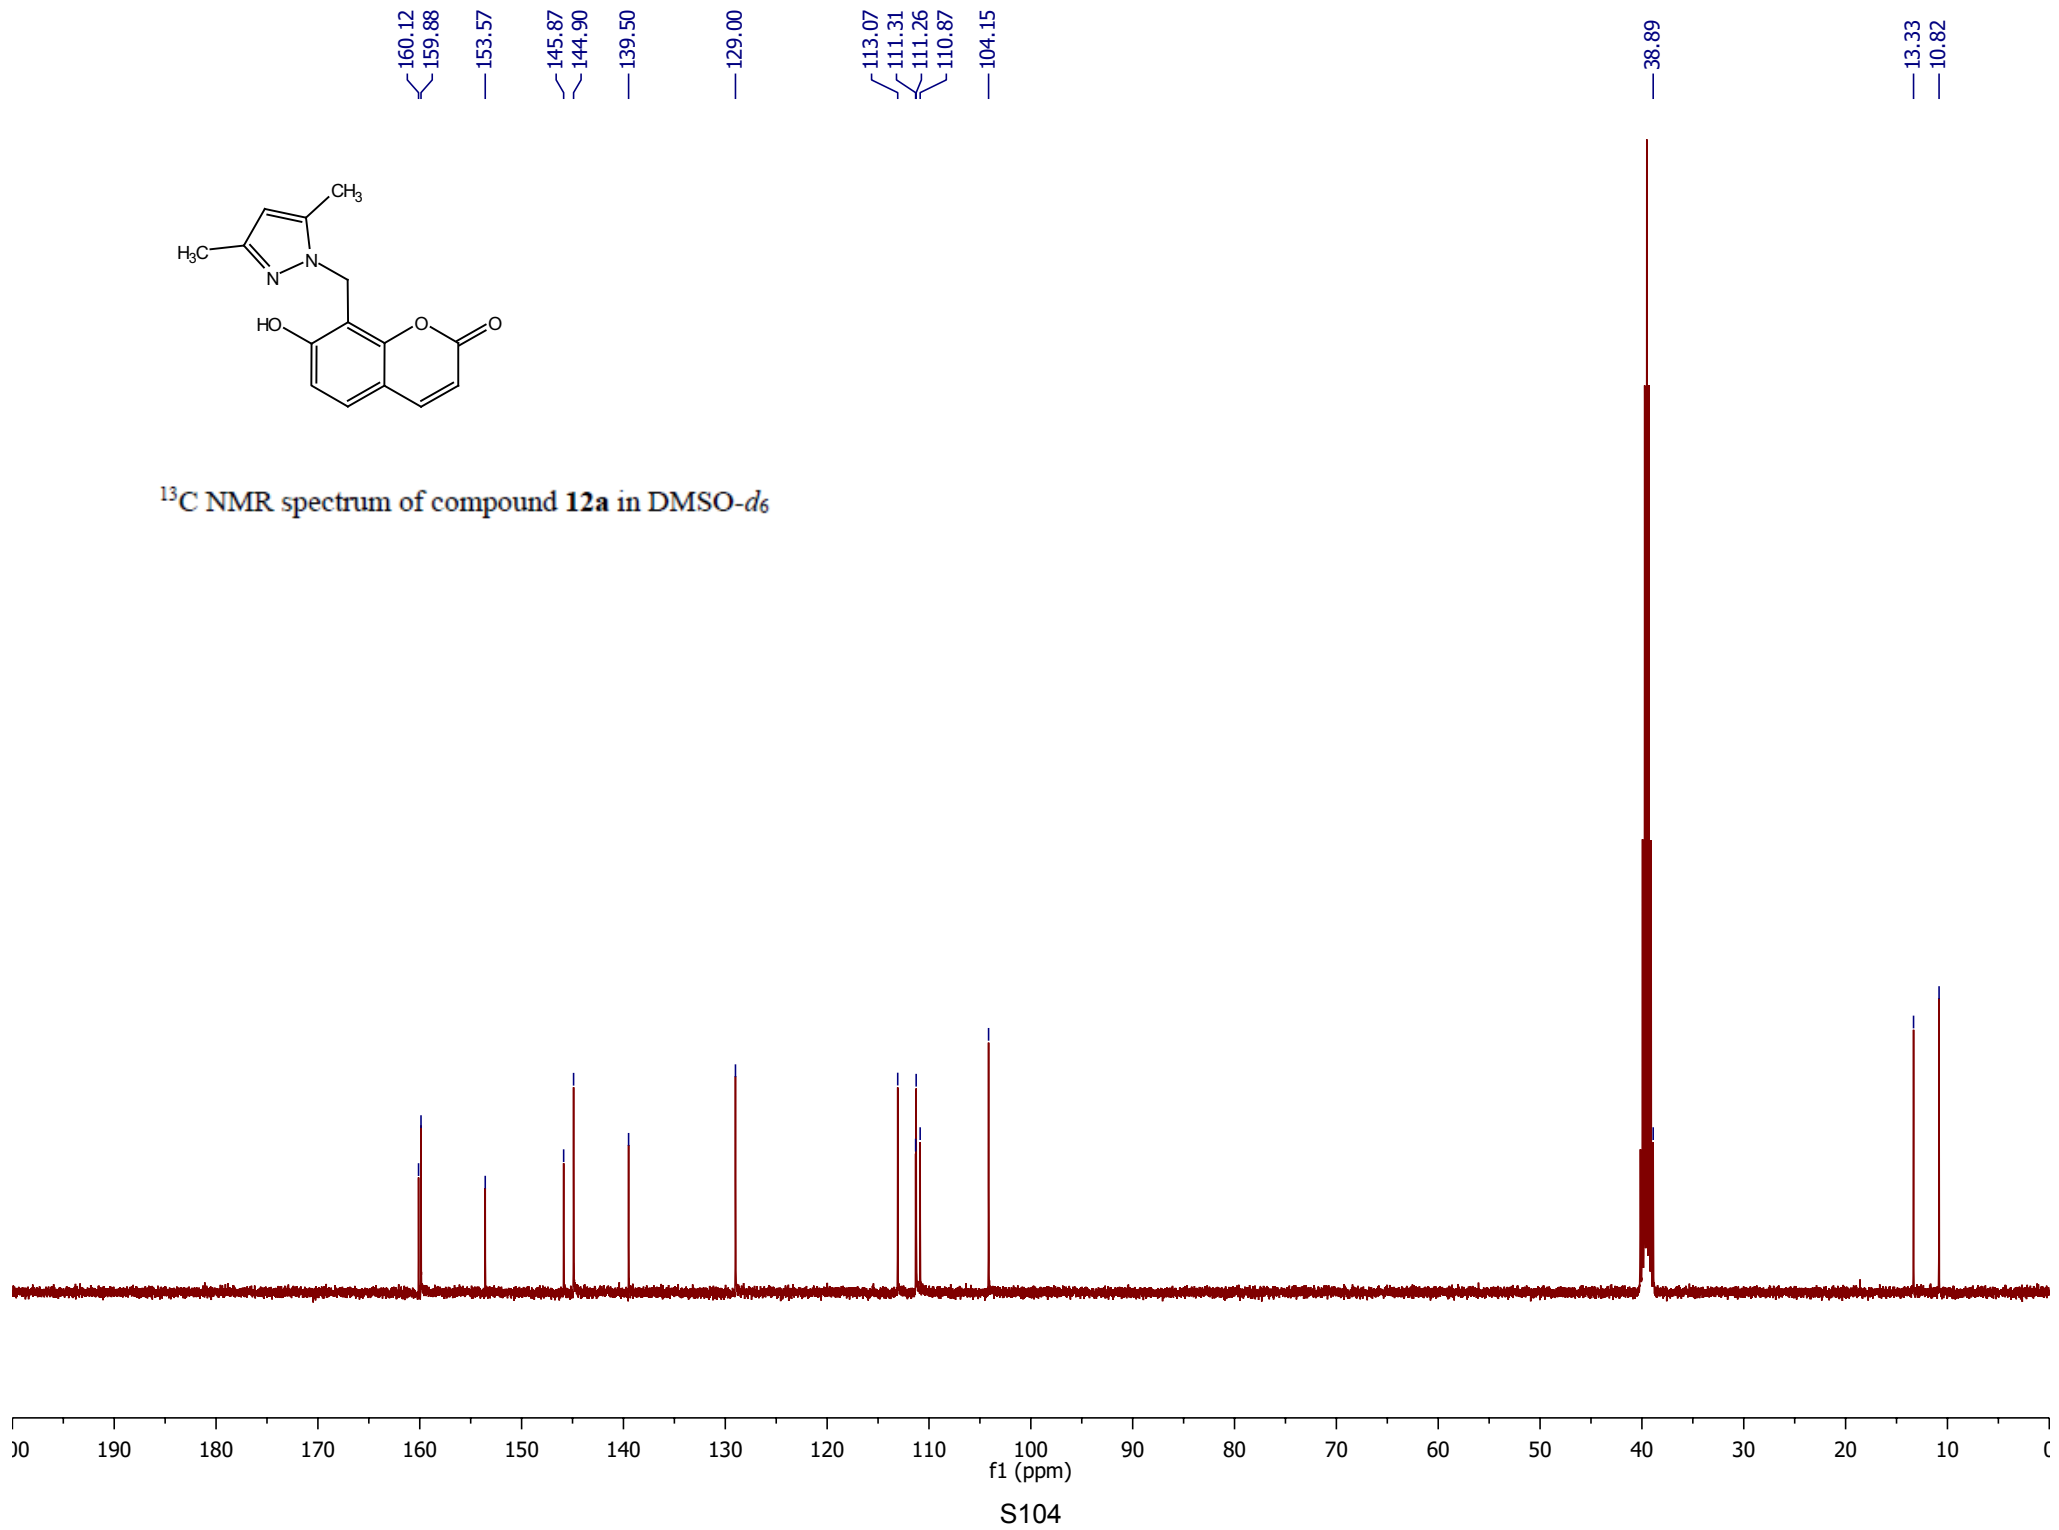



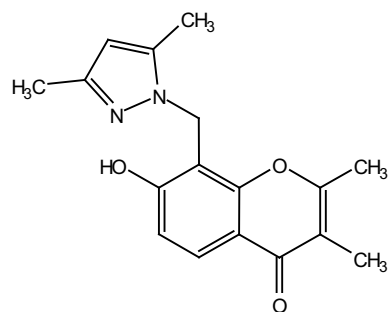

$^1\text{H}$  NMR spectrum of compound 12b in  $\text{DMSO-}d_6$

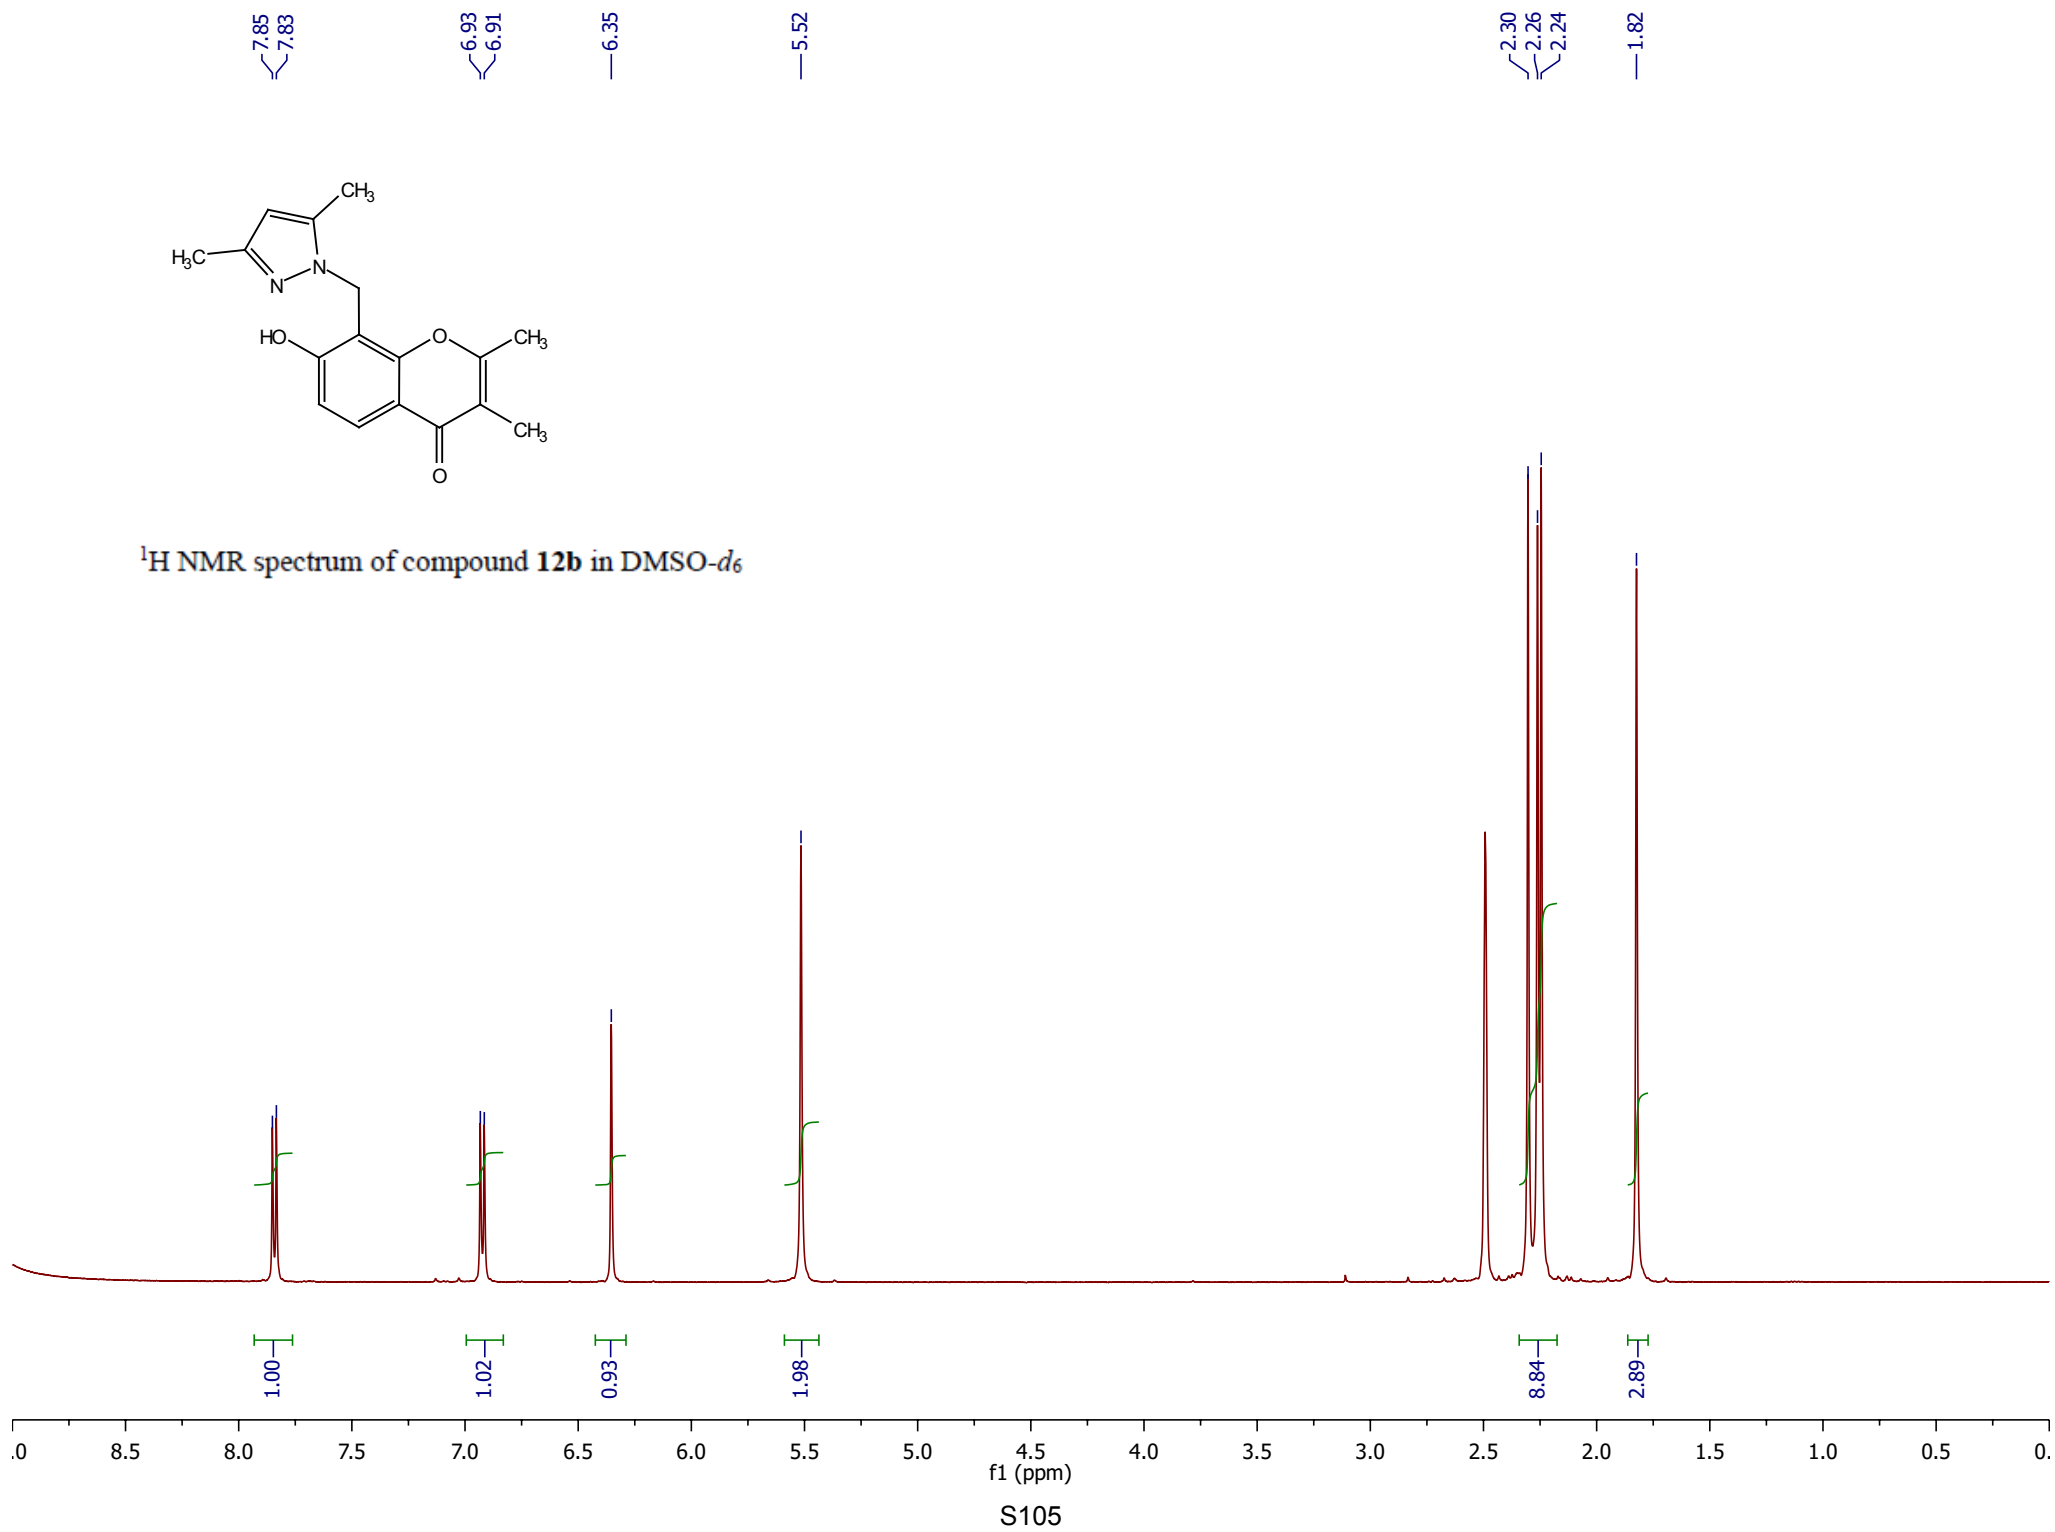

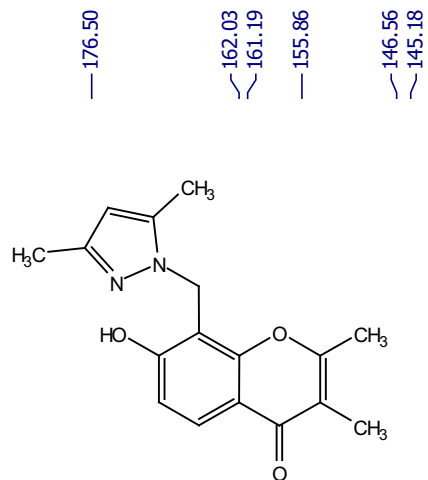

$^{13}\text{C}$  NMR spectrum of compound **12b** in  $\text{DMSO-}d_6$

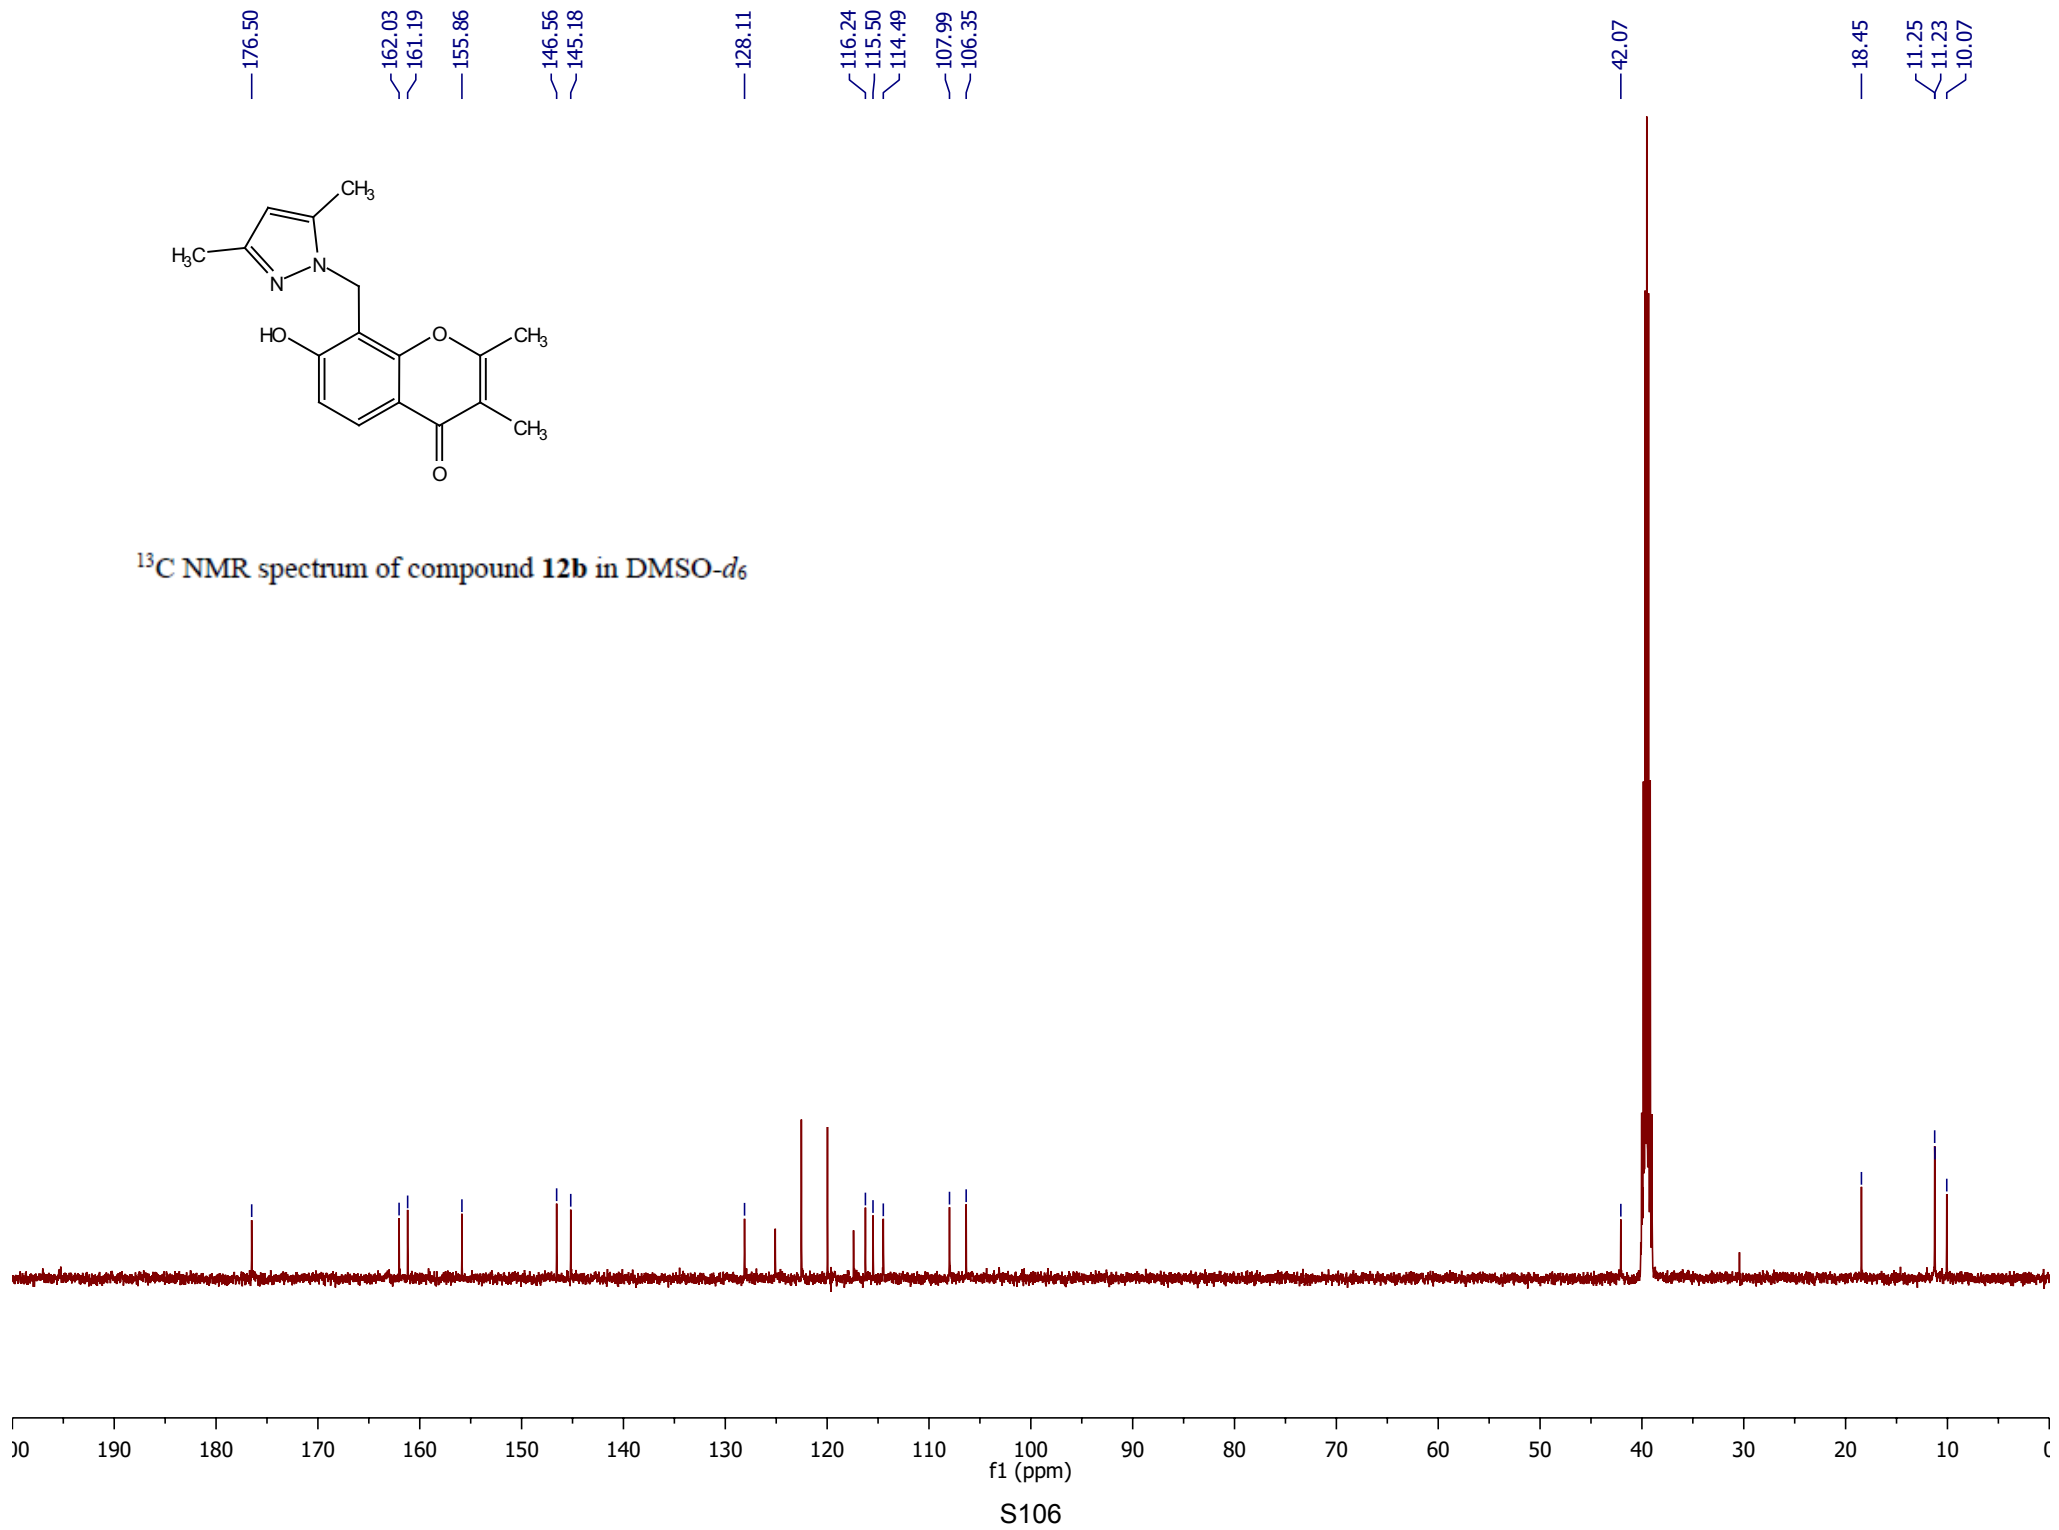

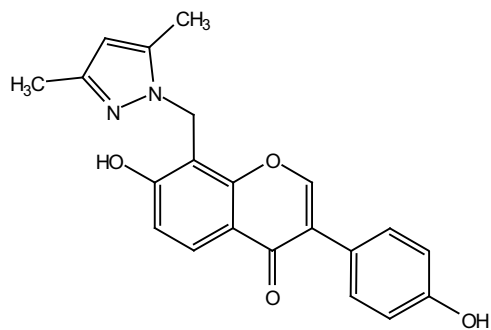

$^1\text{H}$  NMR spectrum of compound 12c in  $\text{DMSO-}d_6$

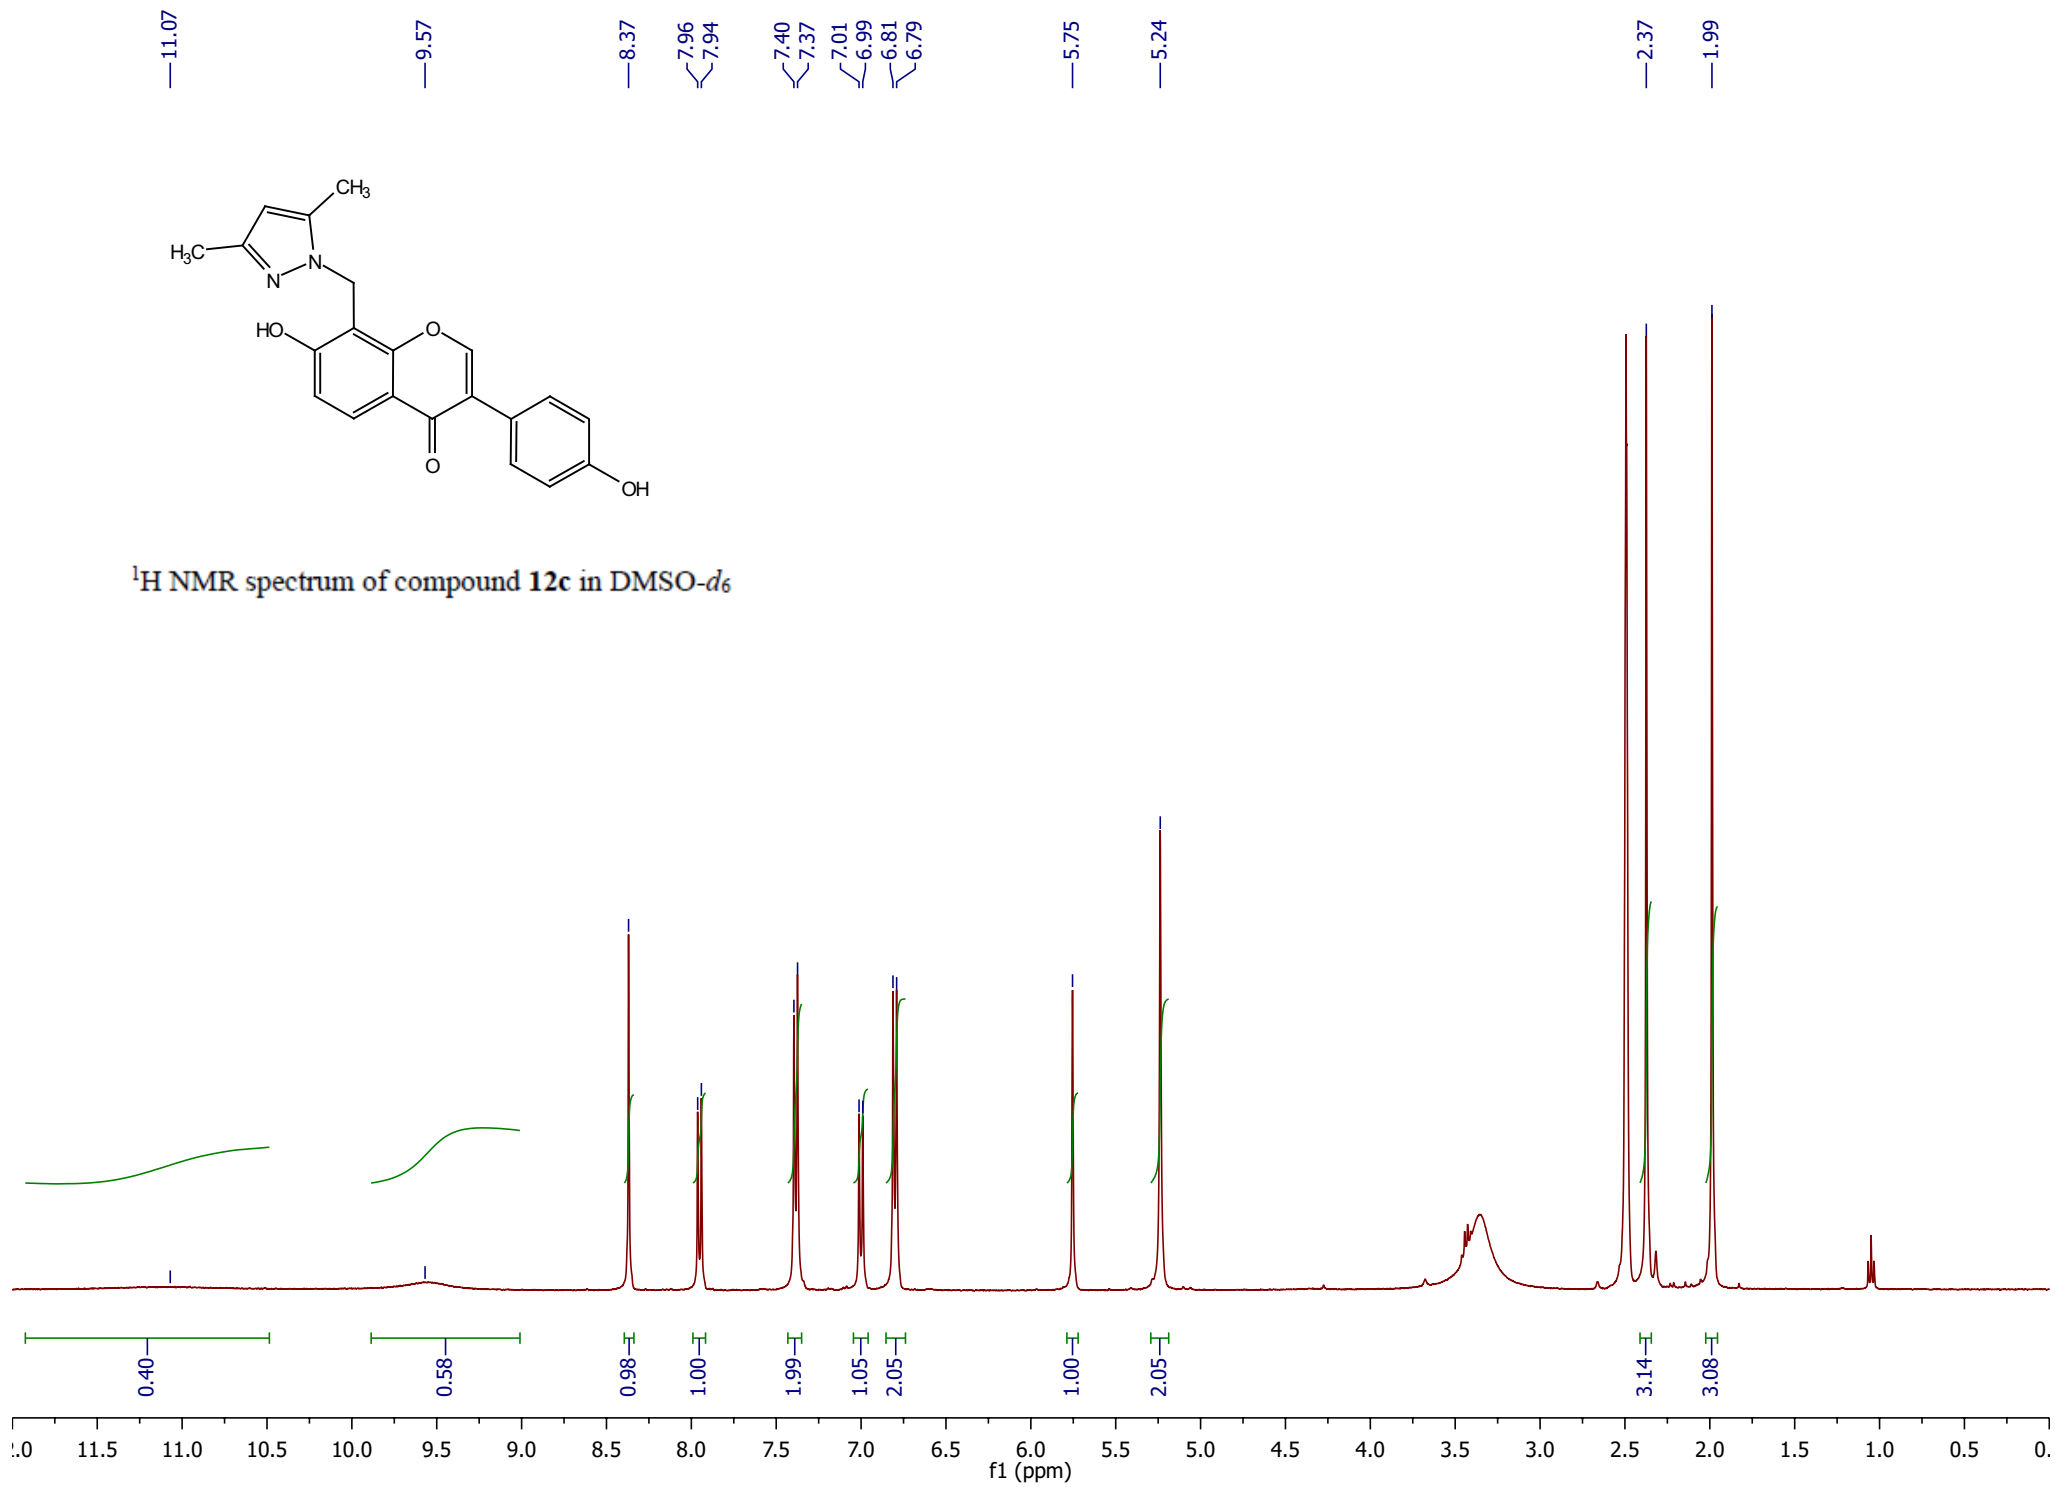

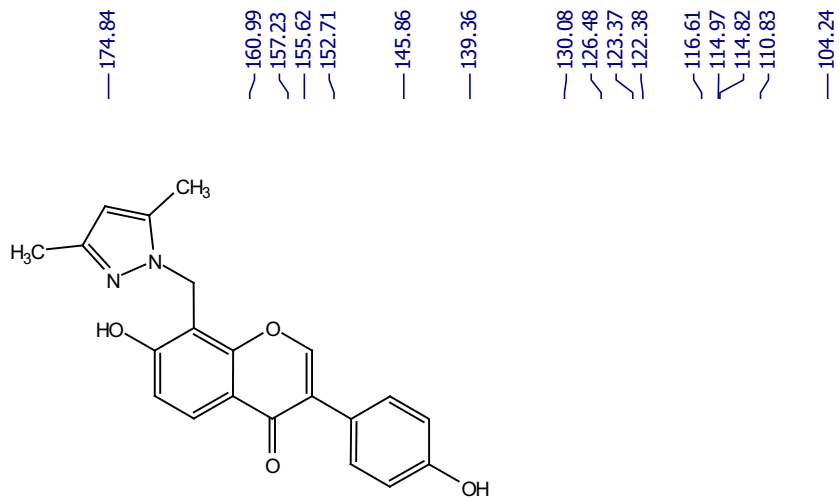

$^{13}\text{C}$  NMR spectrum of compound **12c** in  $\text{DMSO-}d_6$

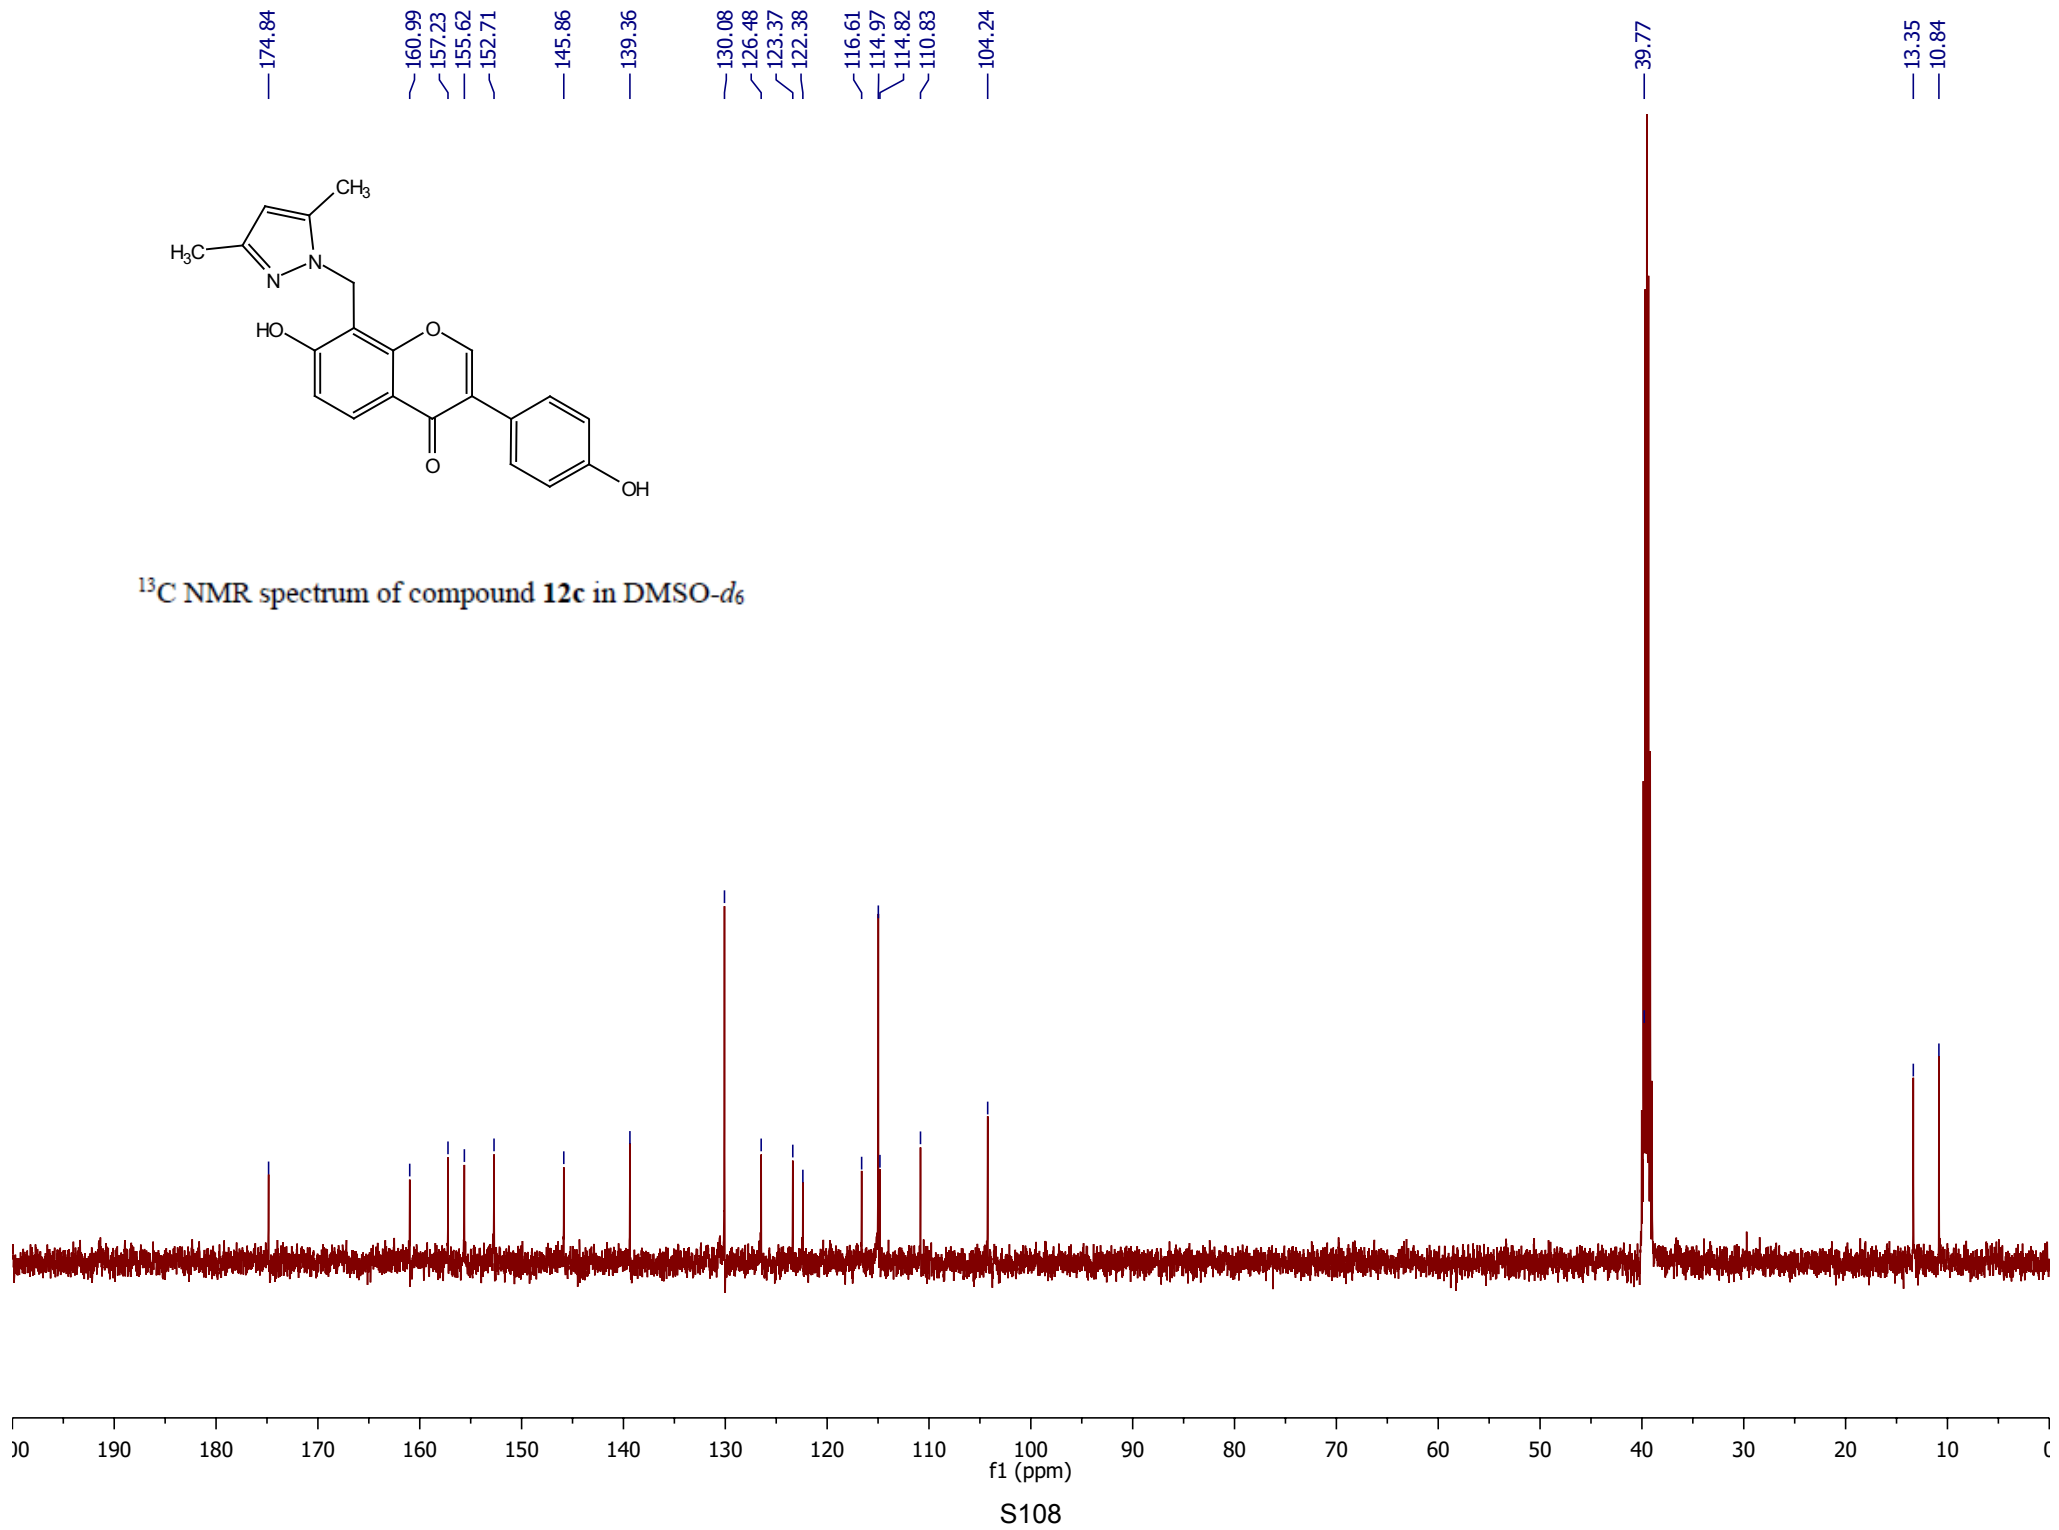

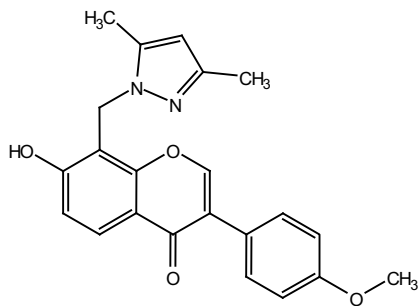

$^1\text{H}$  NMR spectrum of compound 12d in  $\text{DMSO-}d_6$

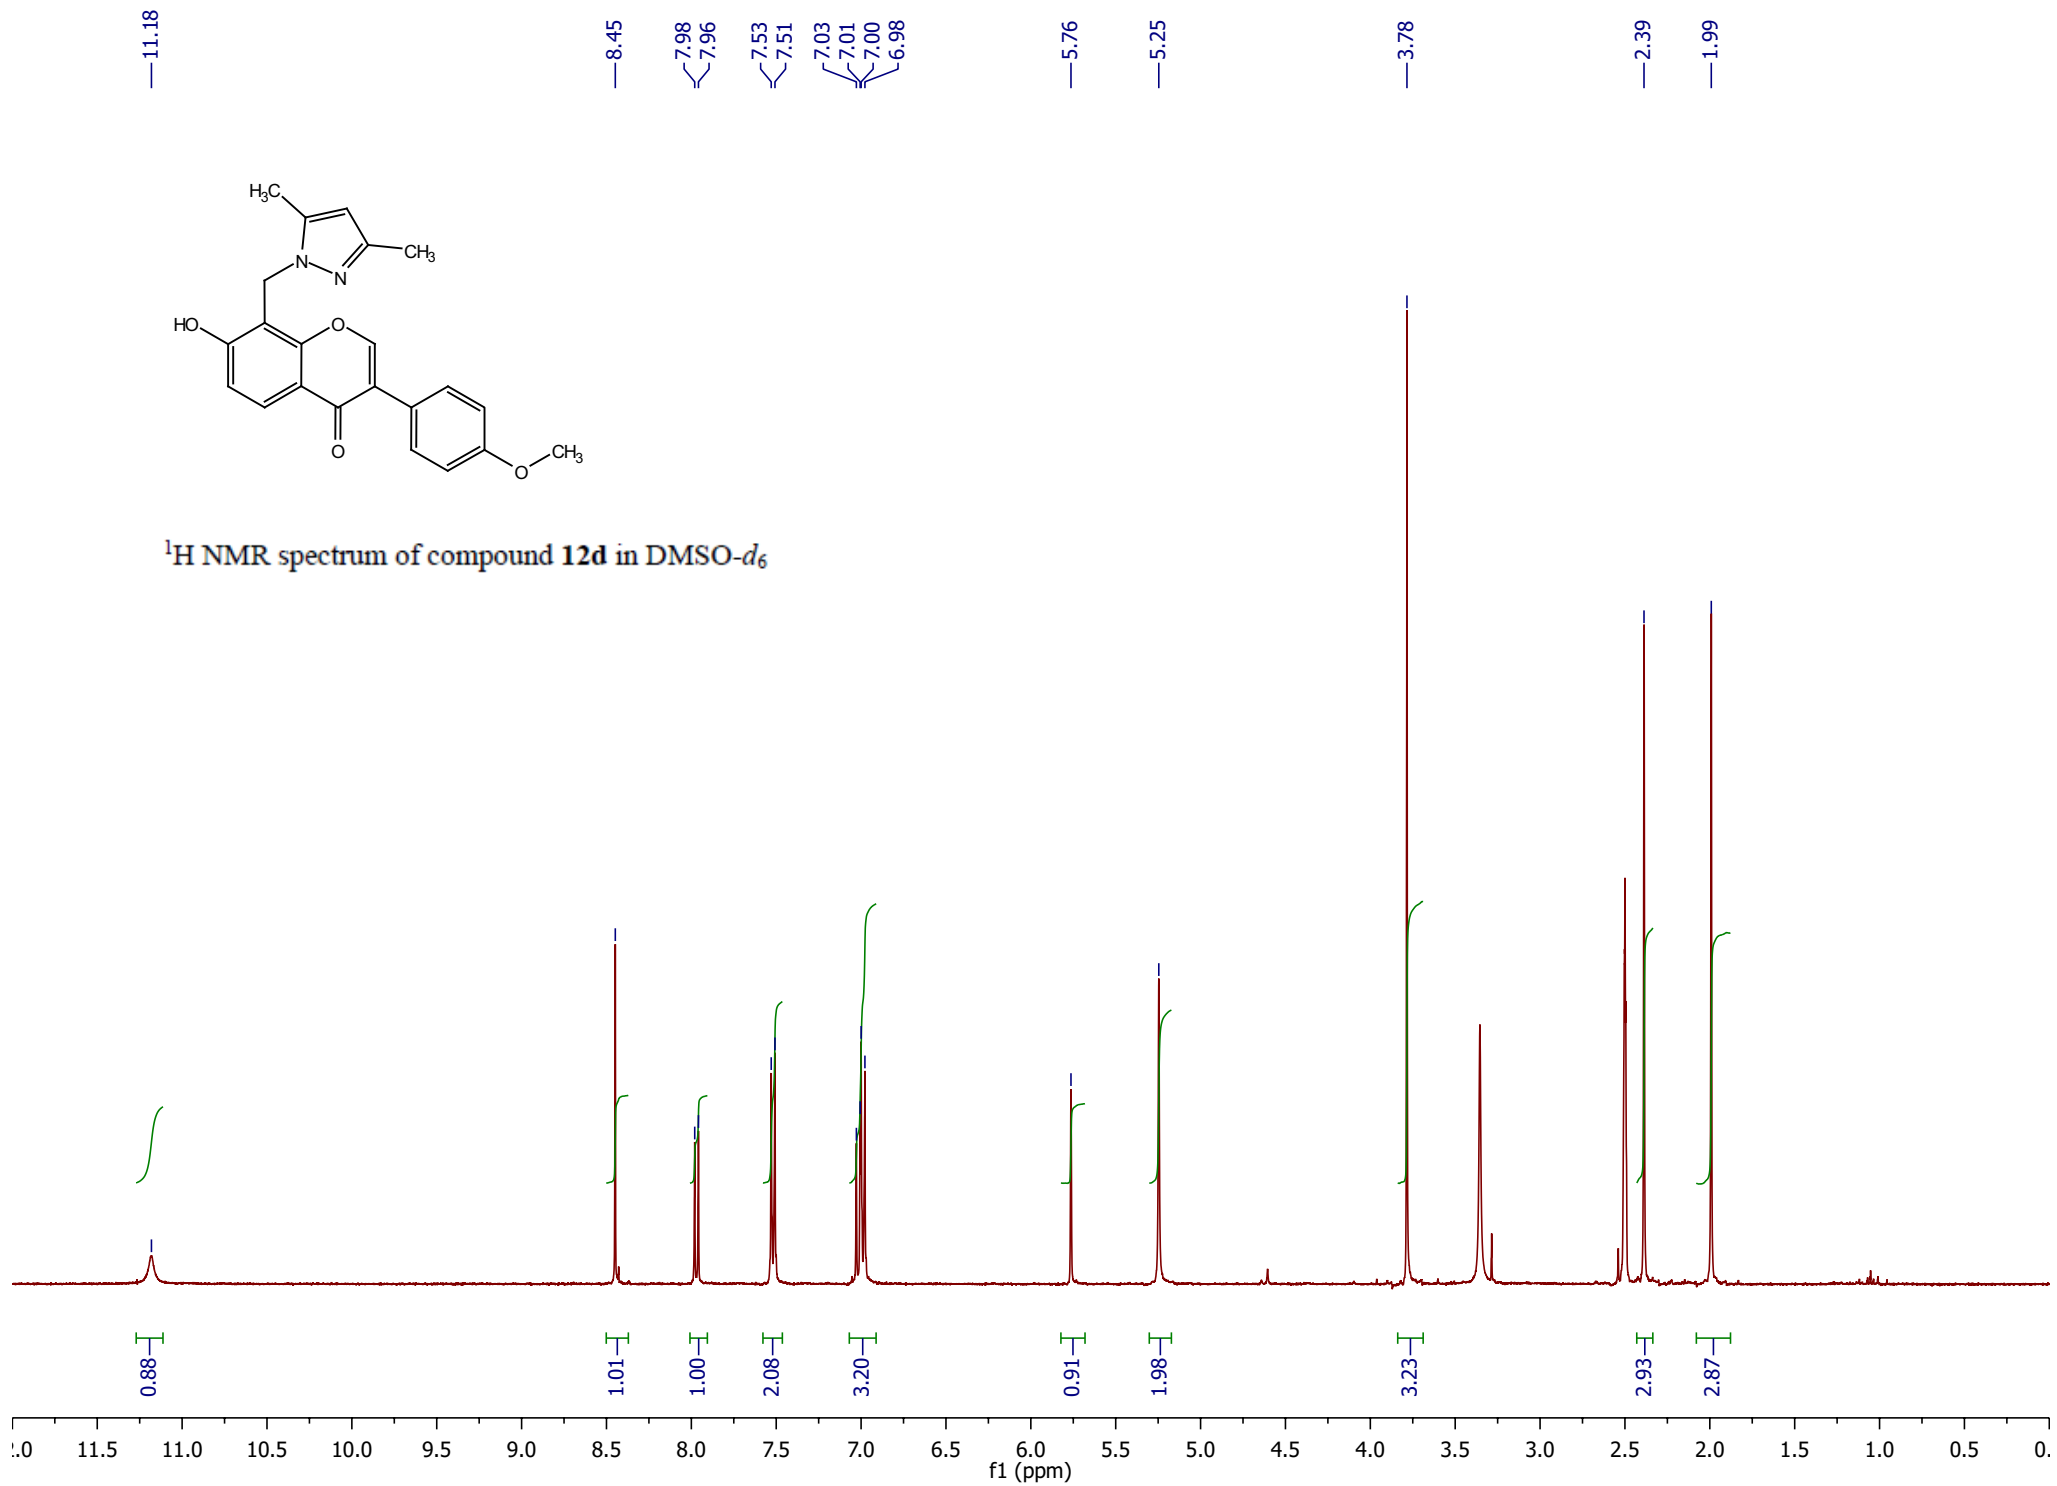

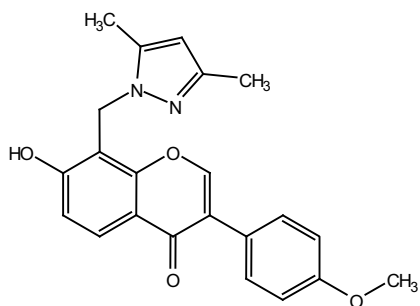

174.75  
160.92  
158.98  
155.62  
153.05  
145.85  
139.35  
130.06  
126.48  
124.05  
123.05  
116.64  
114.83  
113.61  
110.88  
104.23

55.14

39.73

13.34  
10.83

$^{13}\text{C}$  NMR spectrum of compound 12d in DMSO- $d_6$

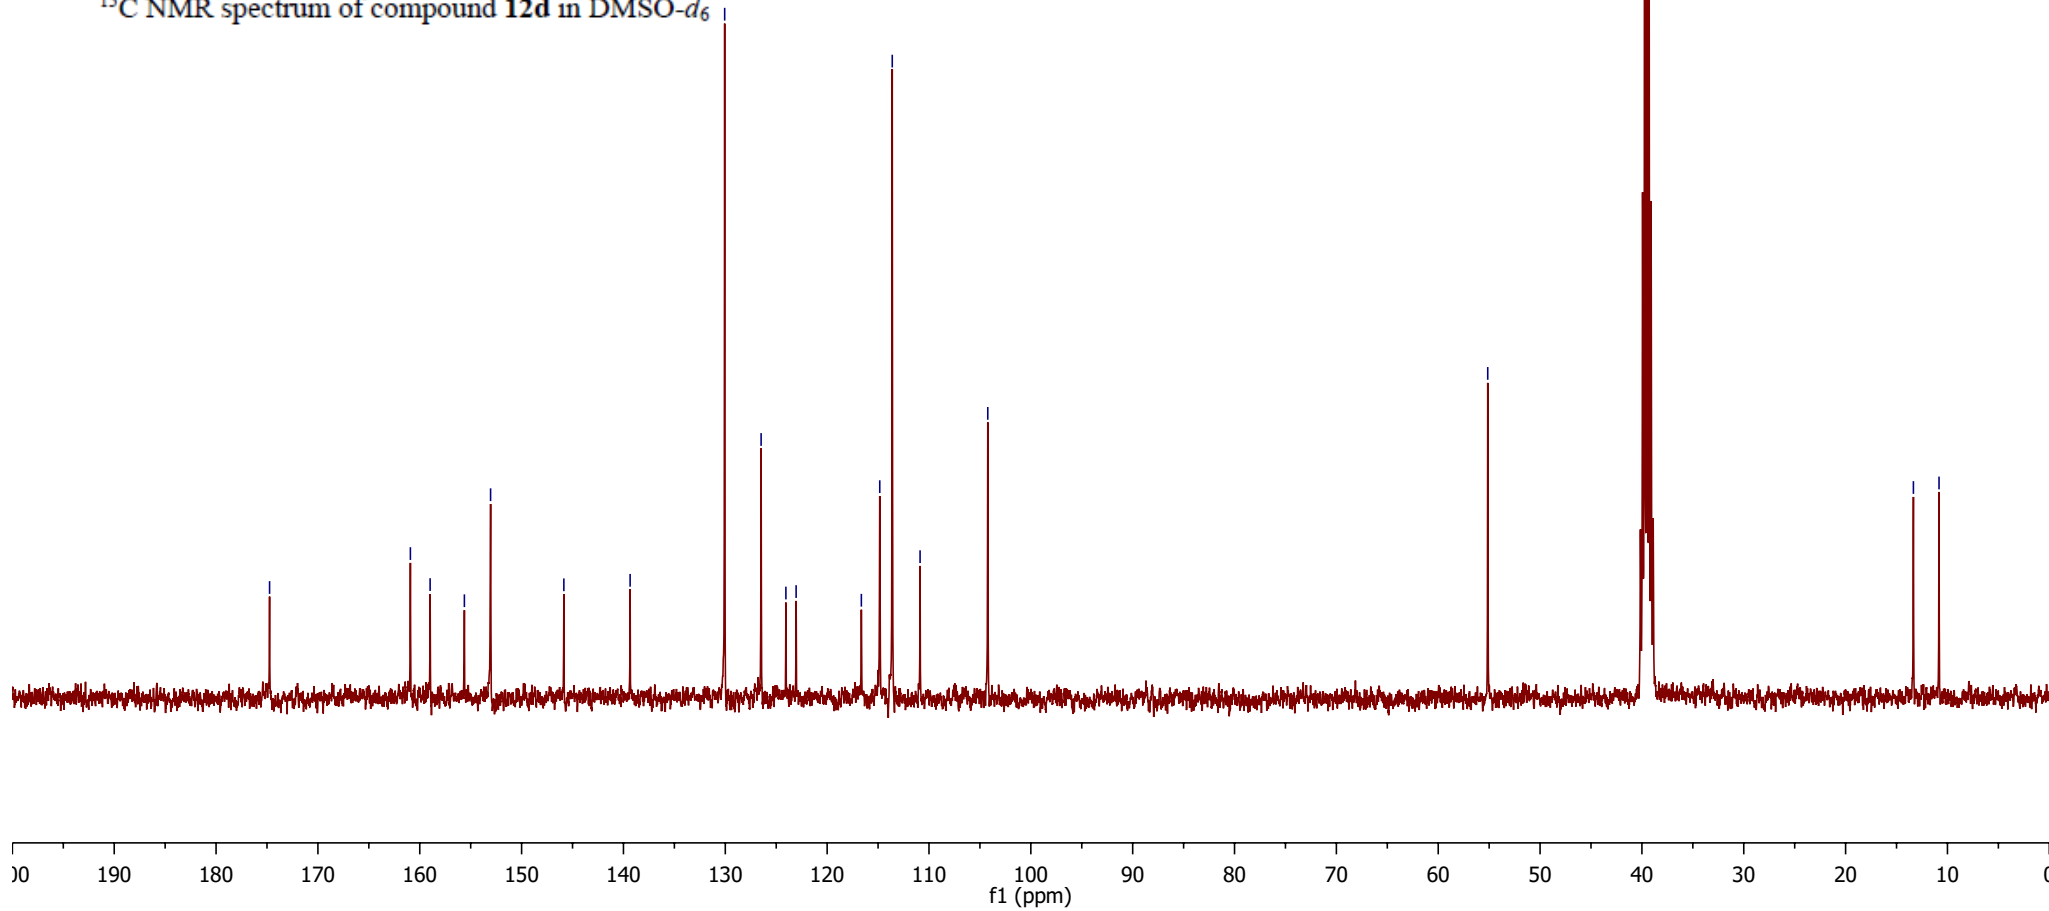

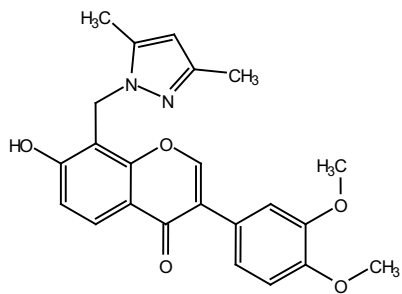

<sup>1</sup>H NMR spectrum of compound 12e in DMSO-*d*<sub>6</sub>

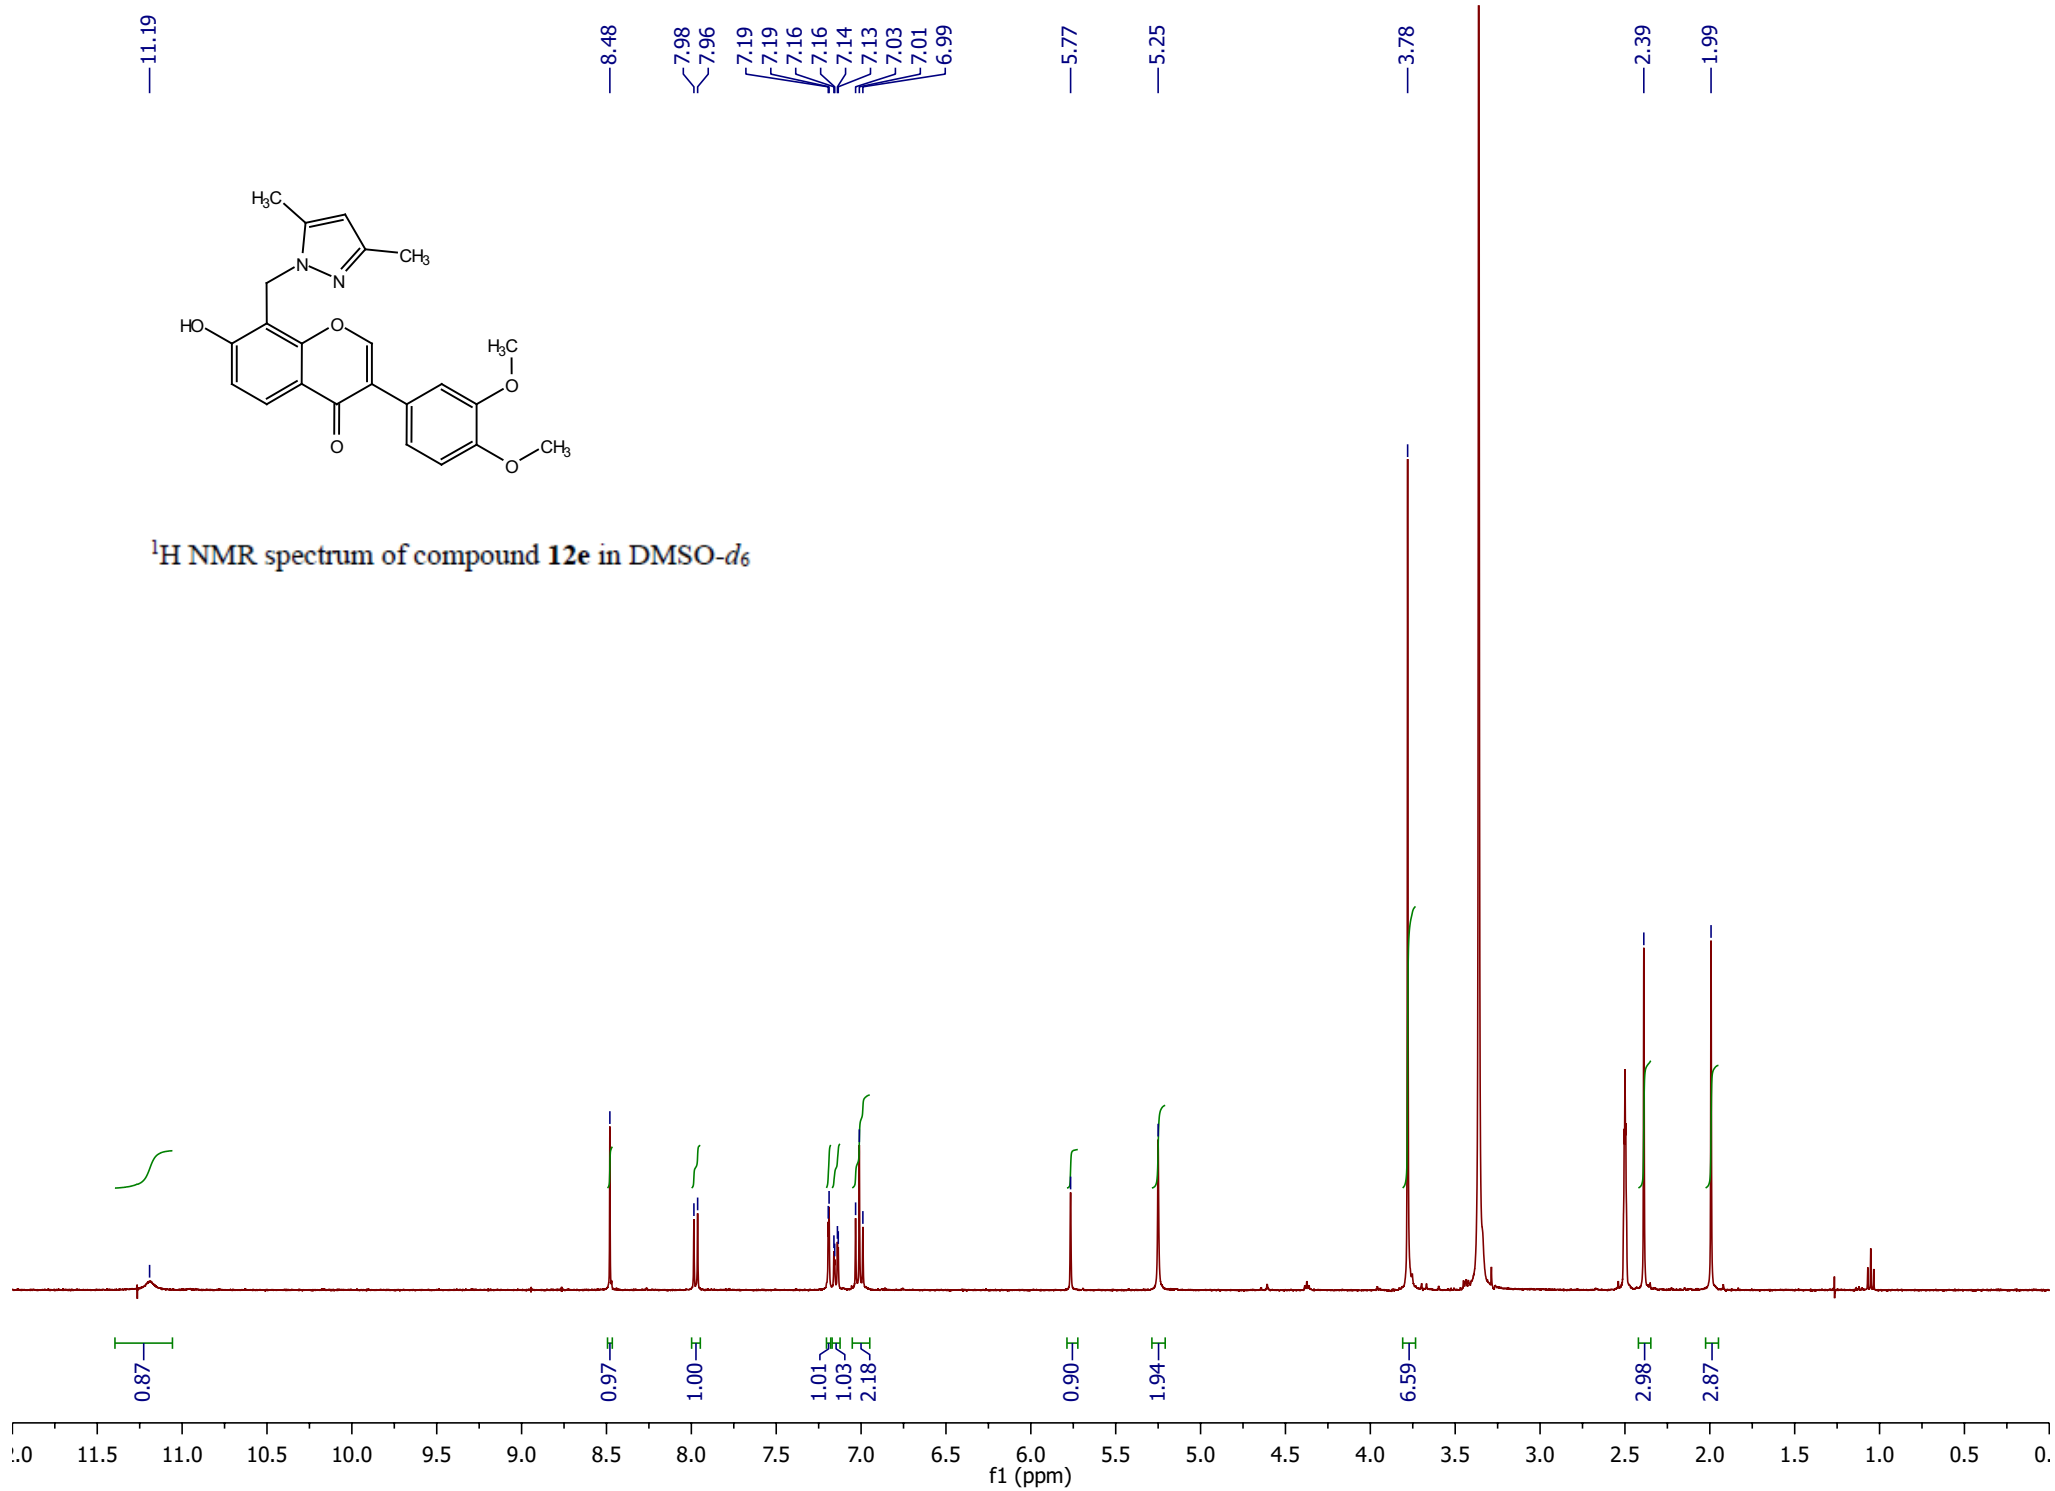

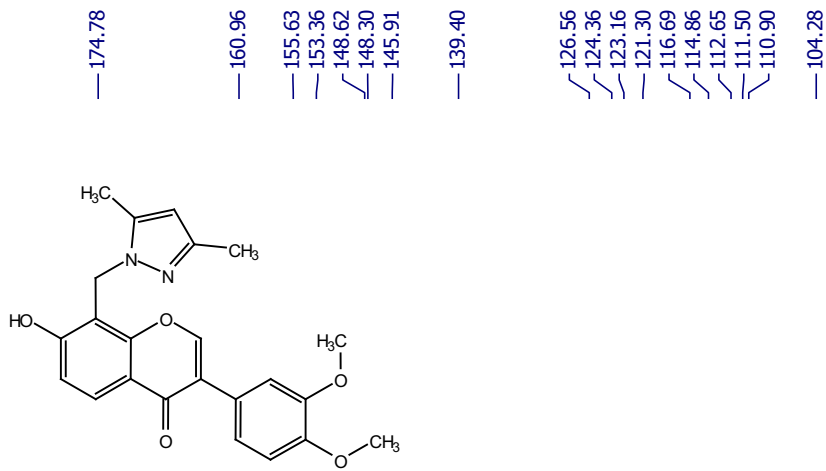

$^{13}\text{C}$  NMR spectrum of compound **12e** in  $\text{DMSO-}d_6$

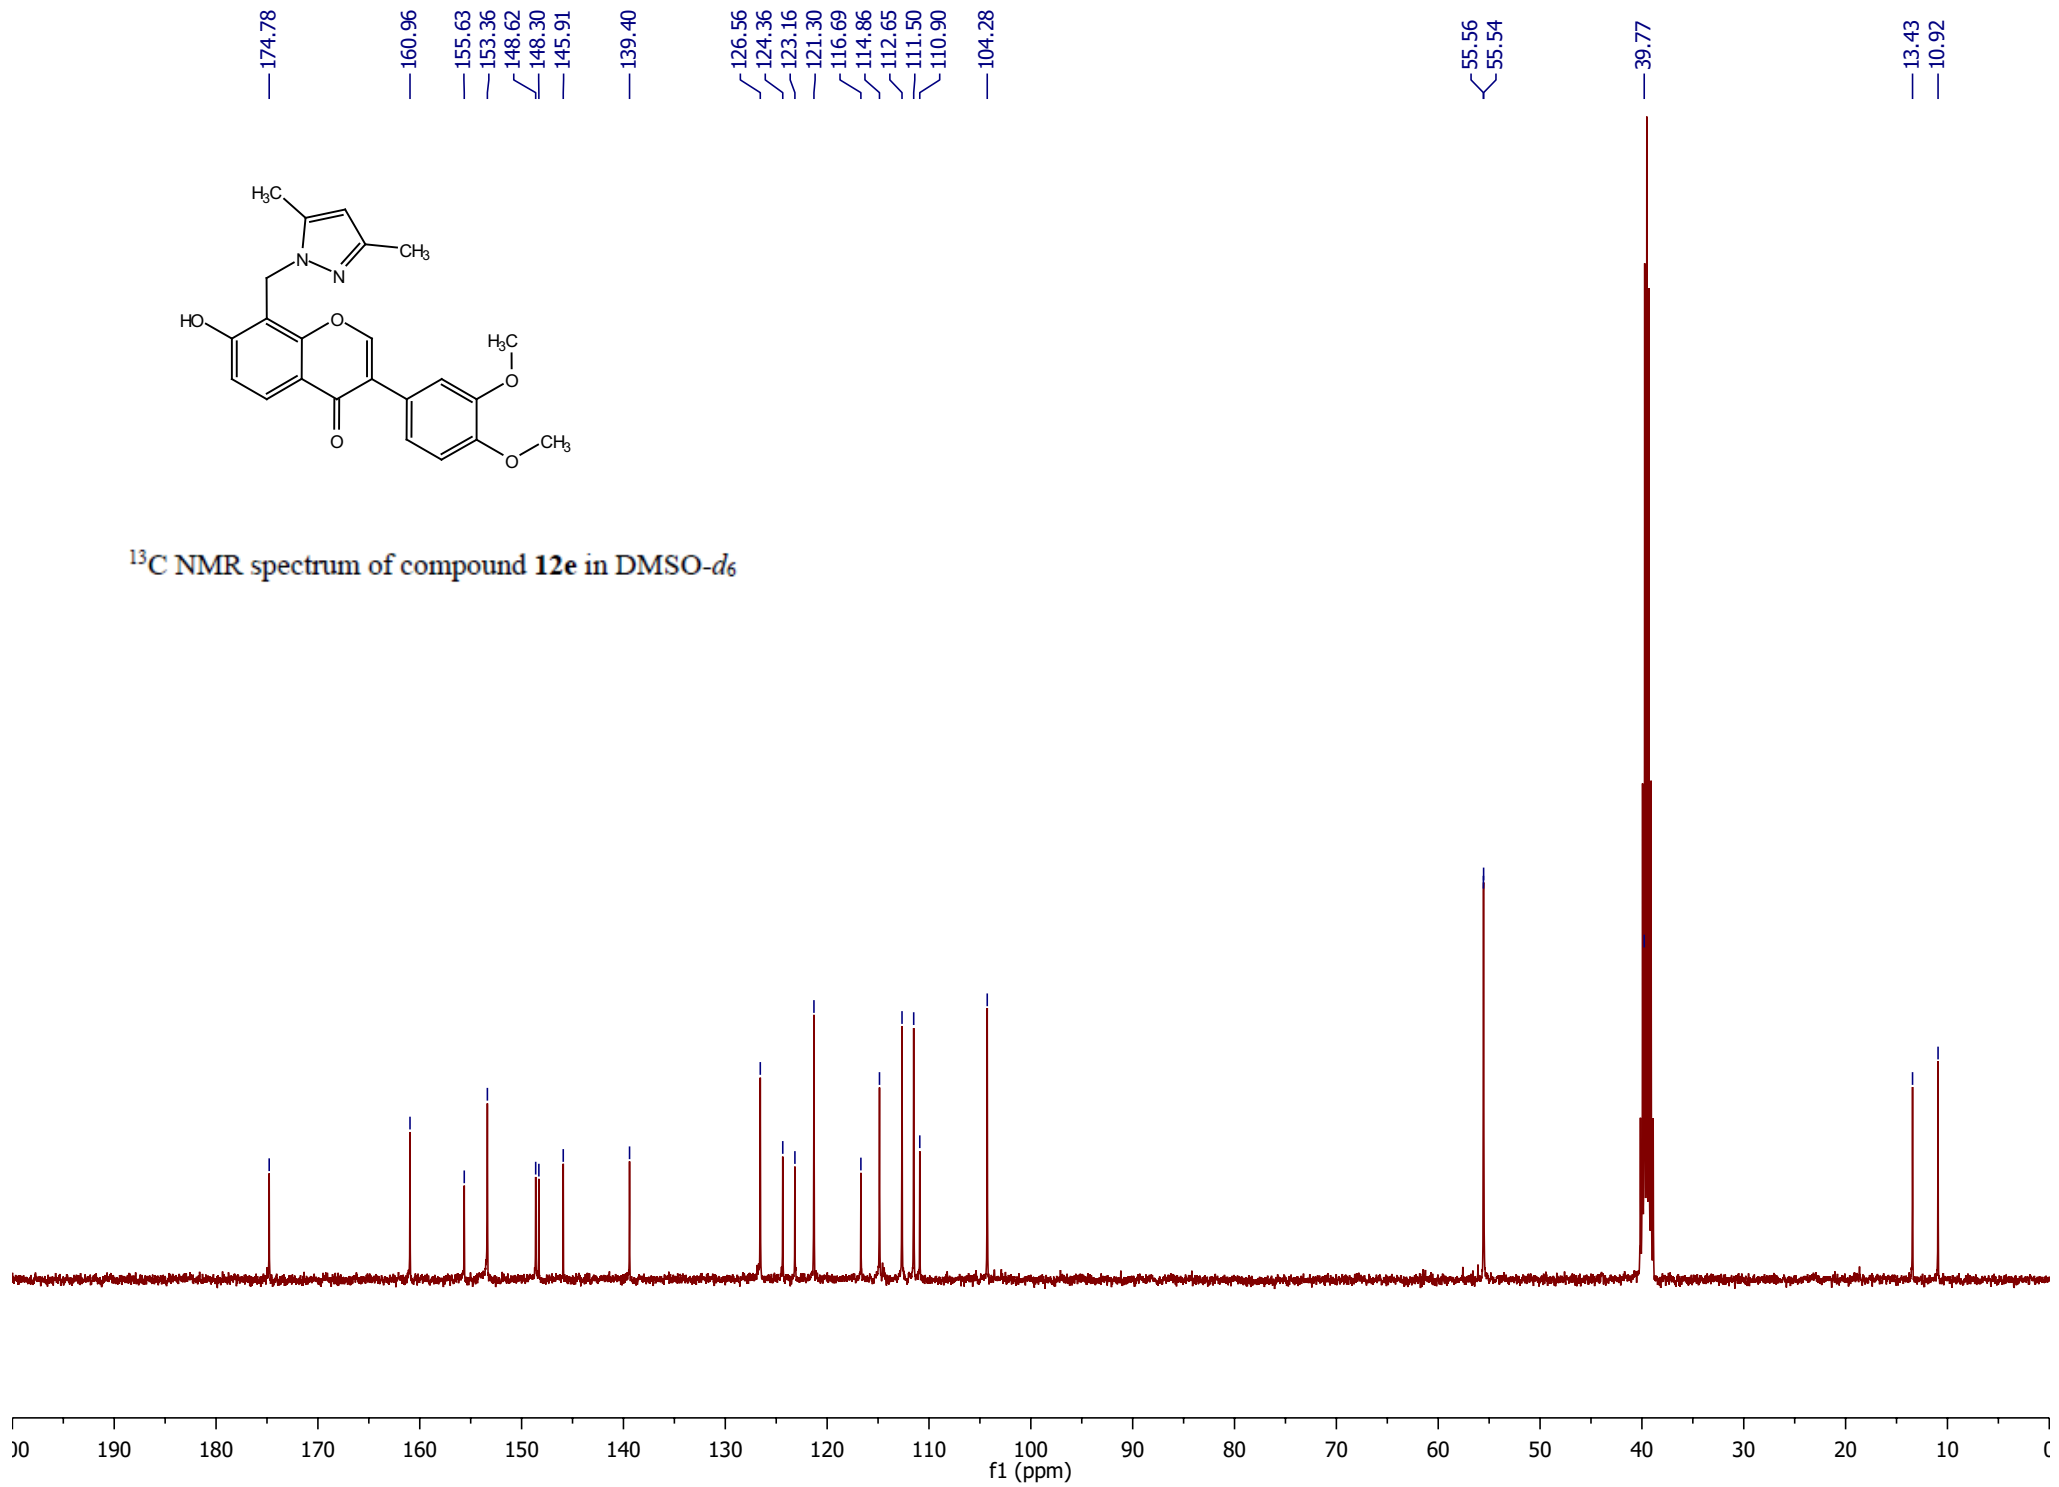



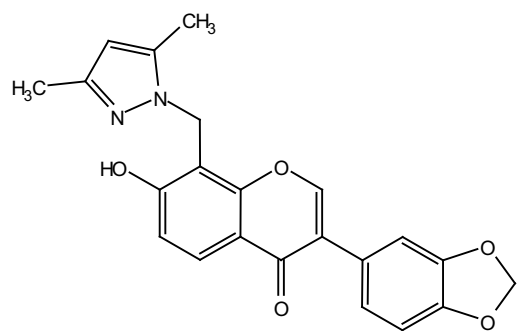

$^1\text{H}$  NMR spectrum of compound **12f** in  $\text{DMSO-}d_6$

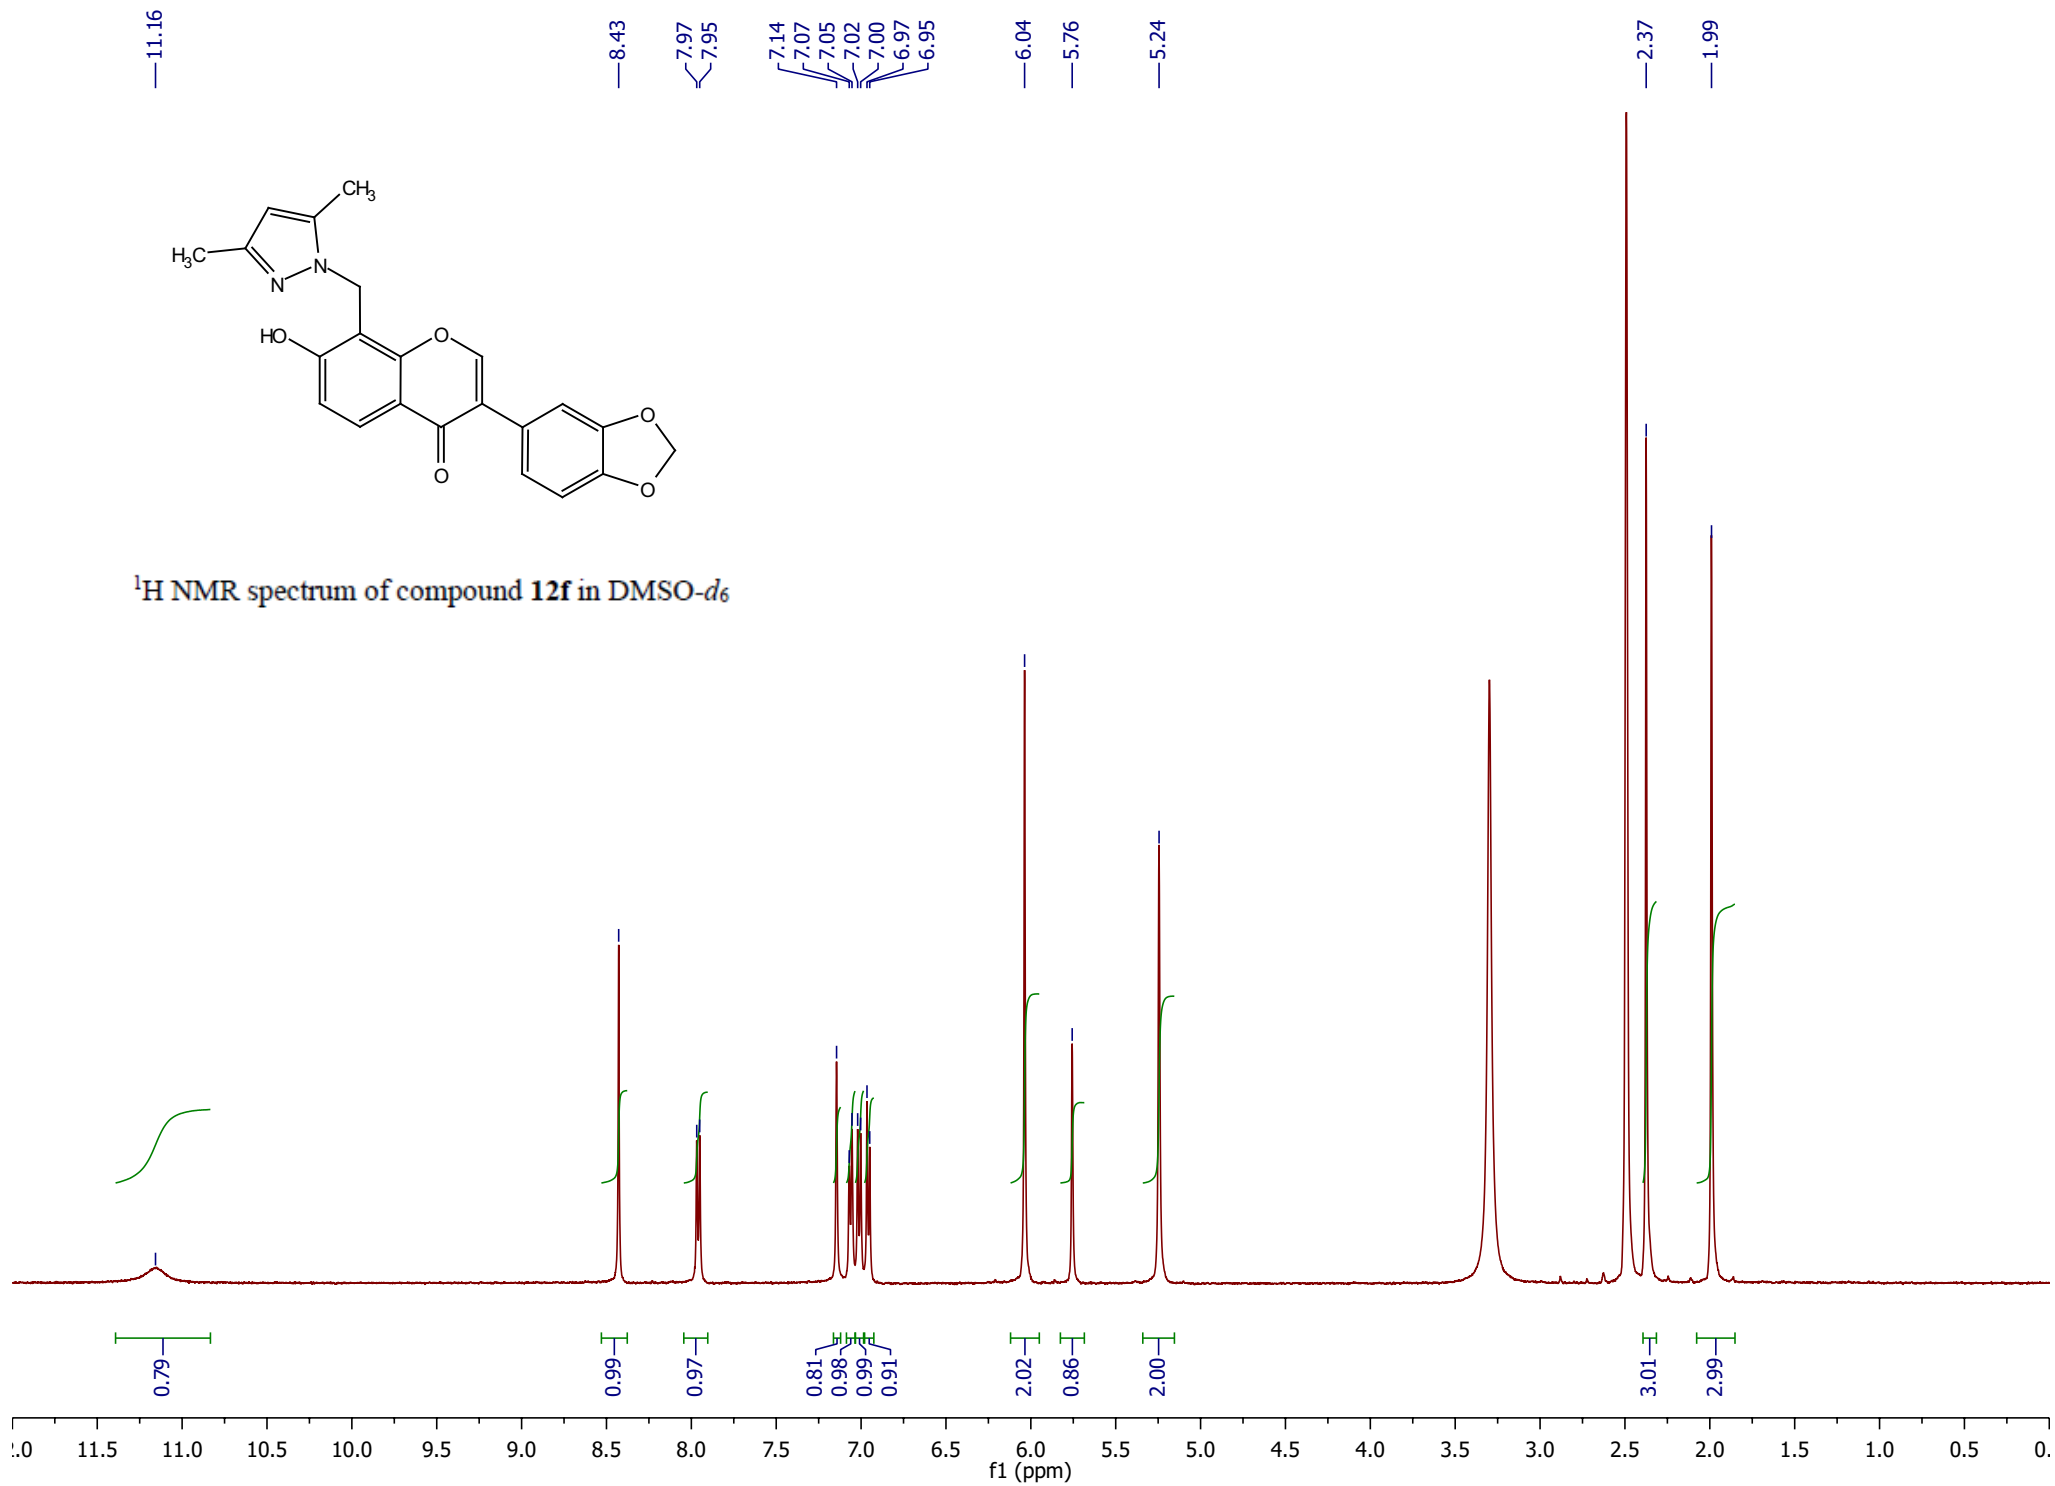

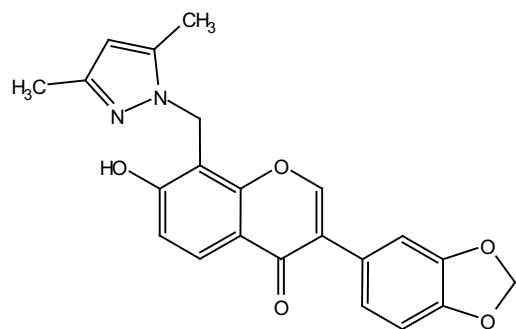

$^{13}\text{C}$  NMR spectrum of compound 12f in  $\text{DMSO-}d_6$

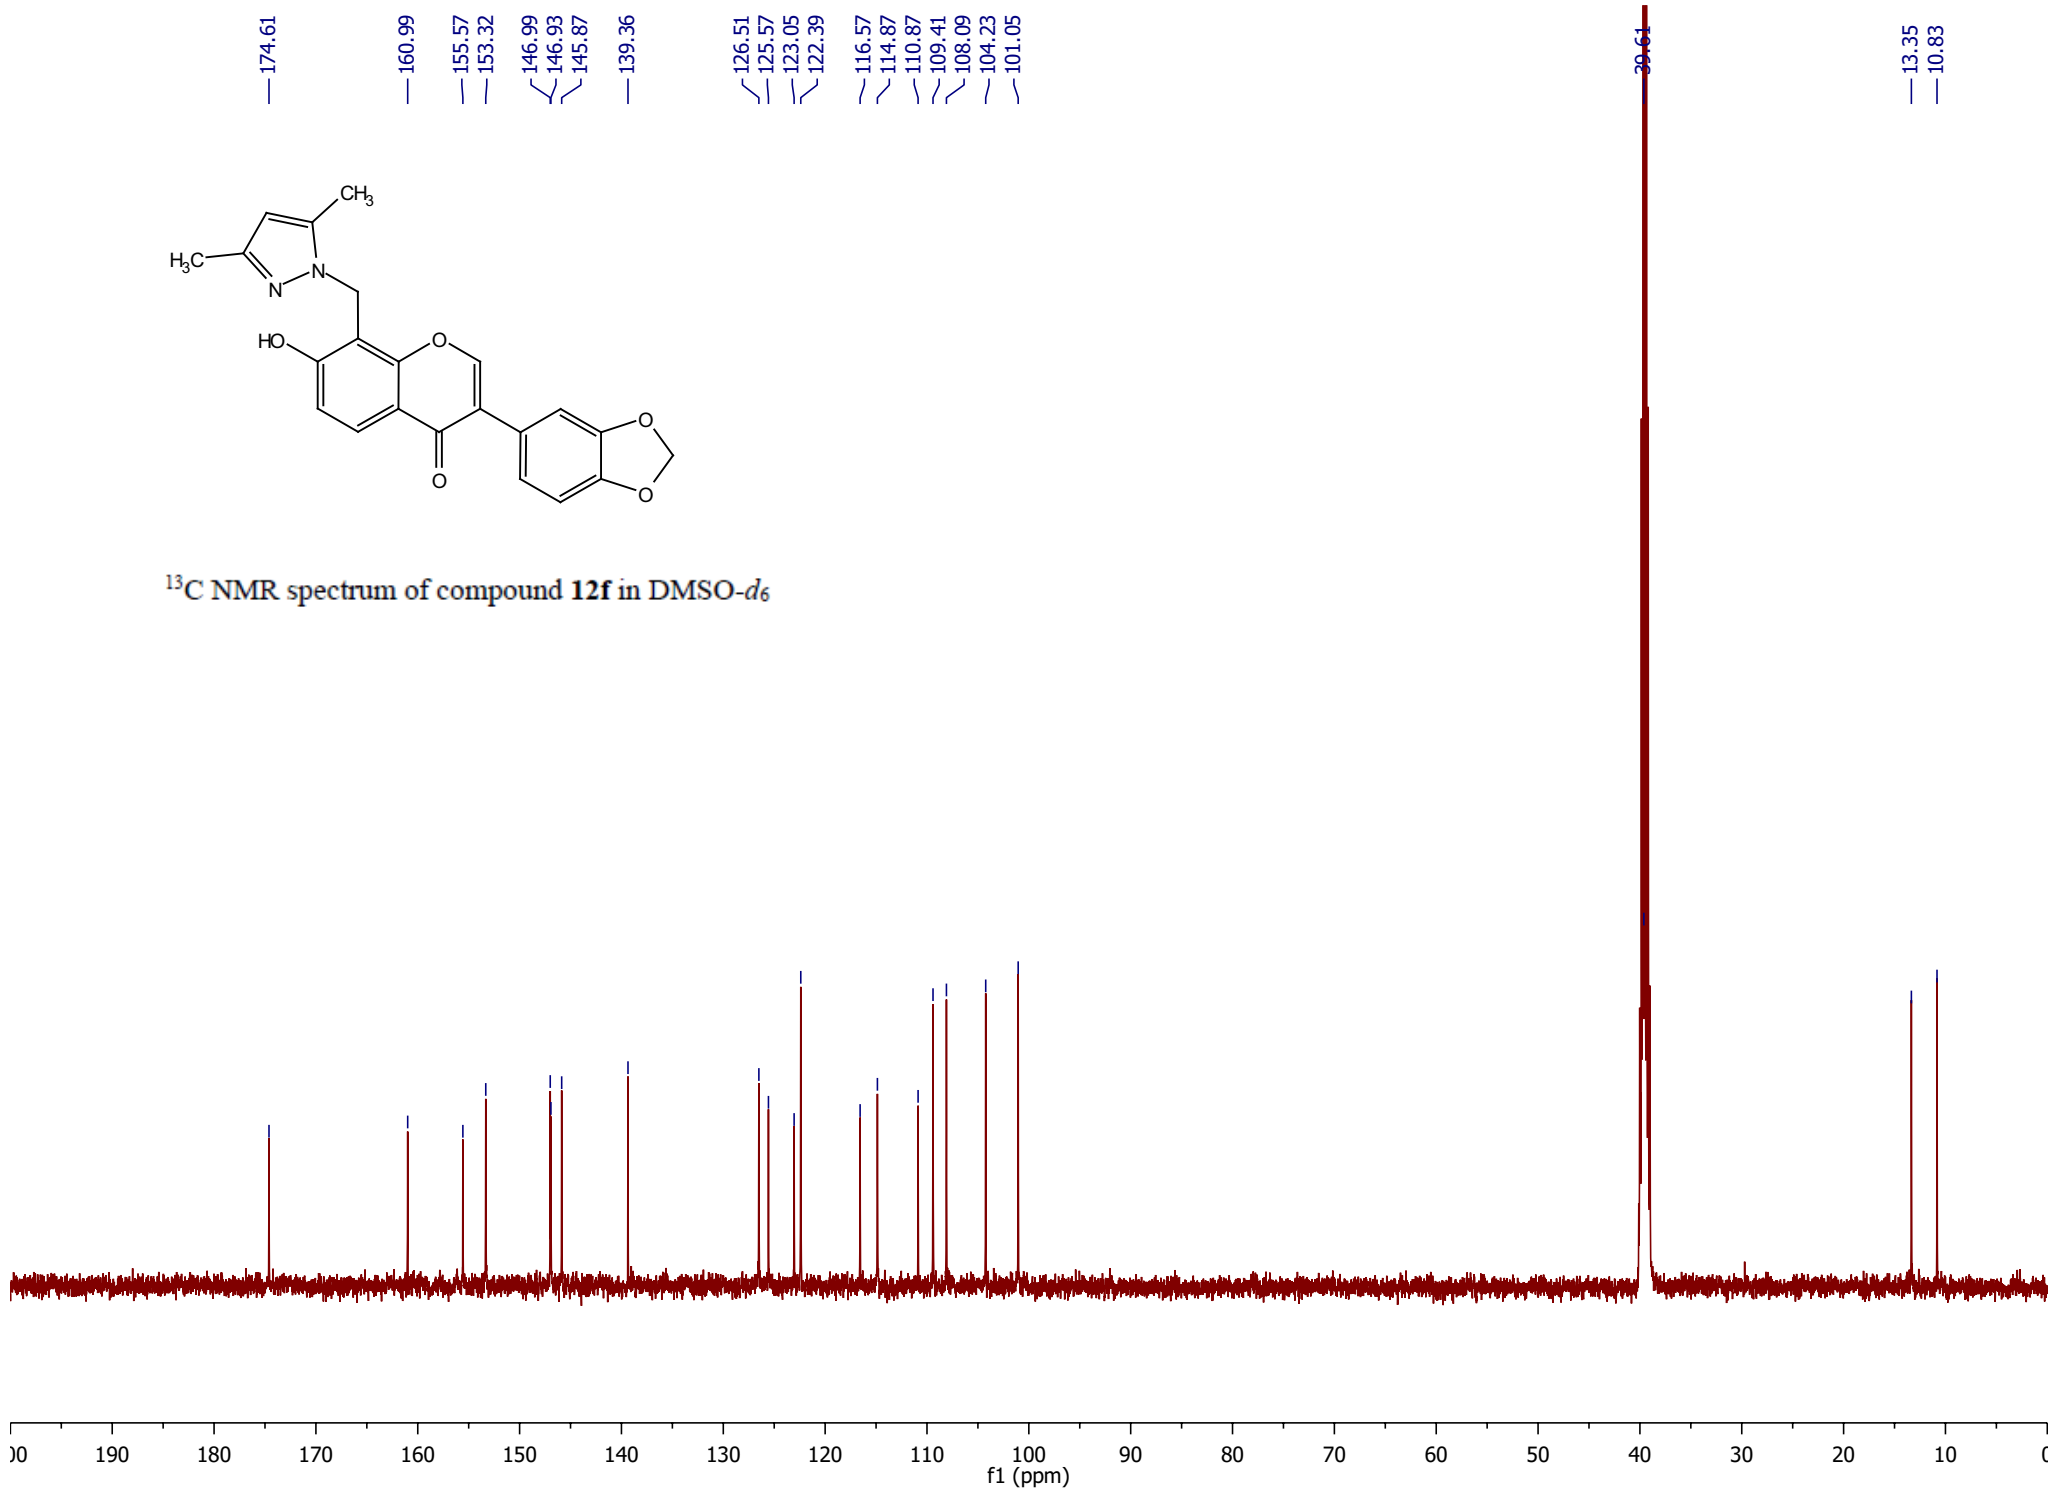

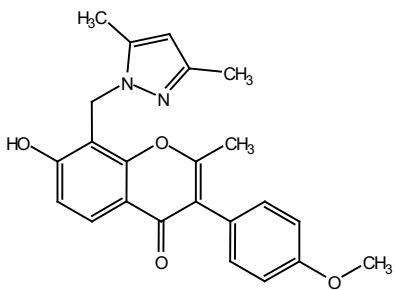

$^1\text{H}$  NMR spectrum of compound **12g** in  $\text{DMSO-}d_6$

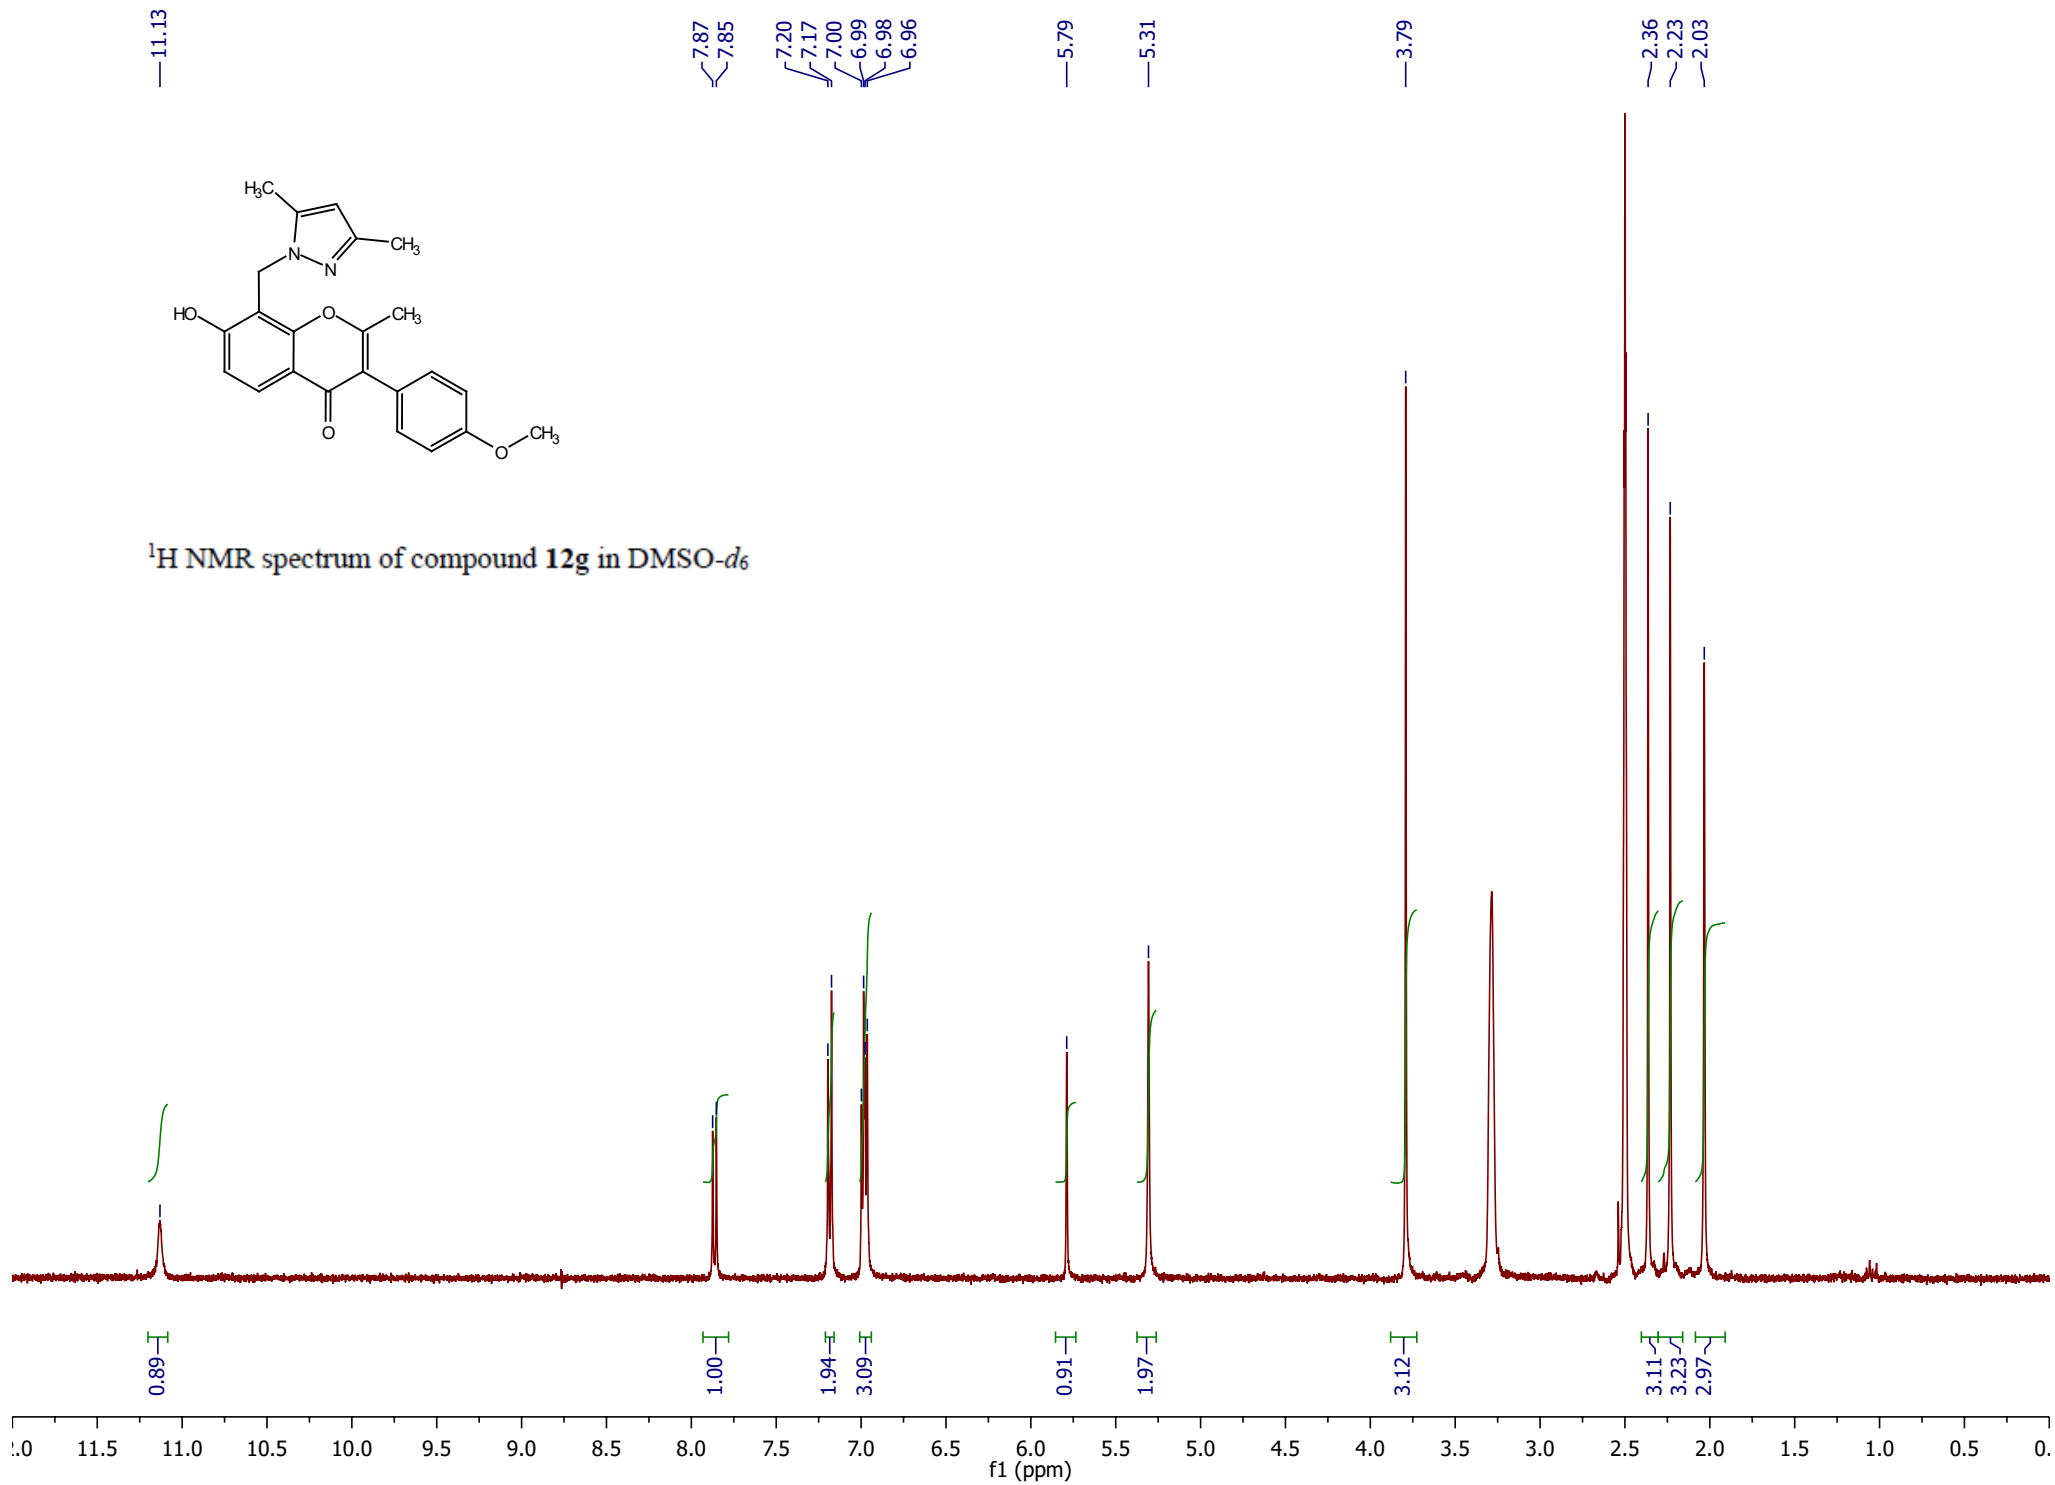

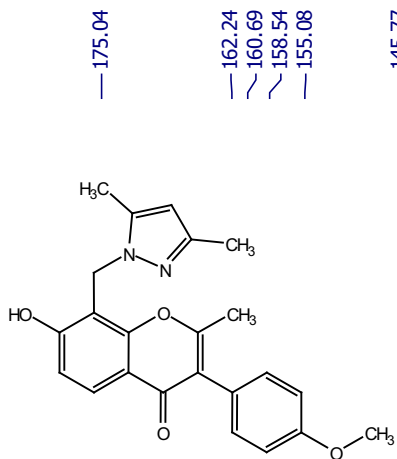

$^{13}\text{C}$  NMR spectrum of compound **12g** in  $\text{DMSO-}d_6$

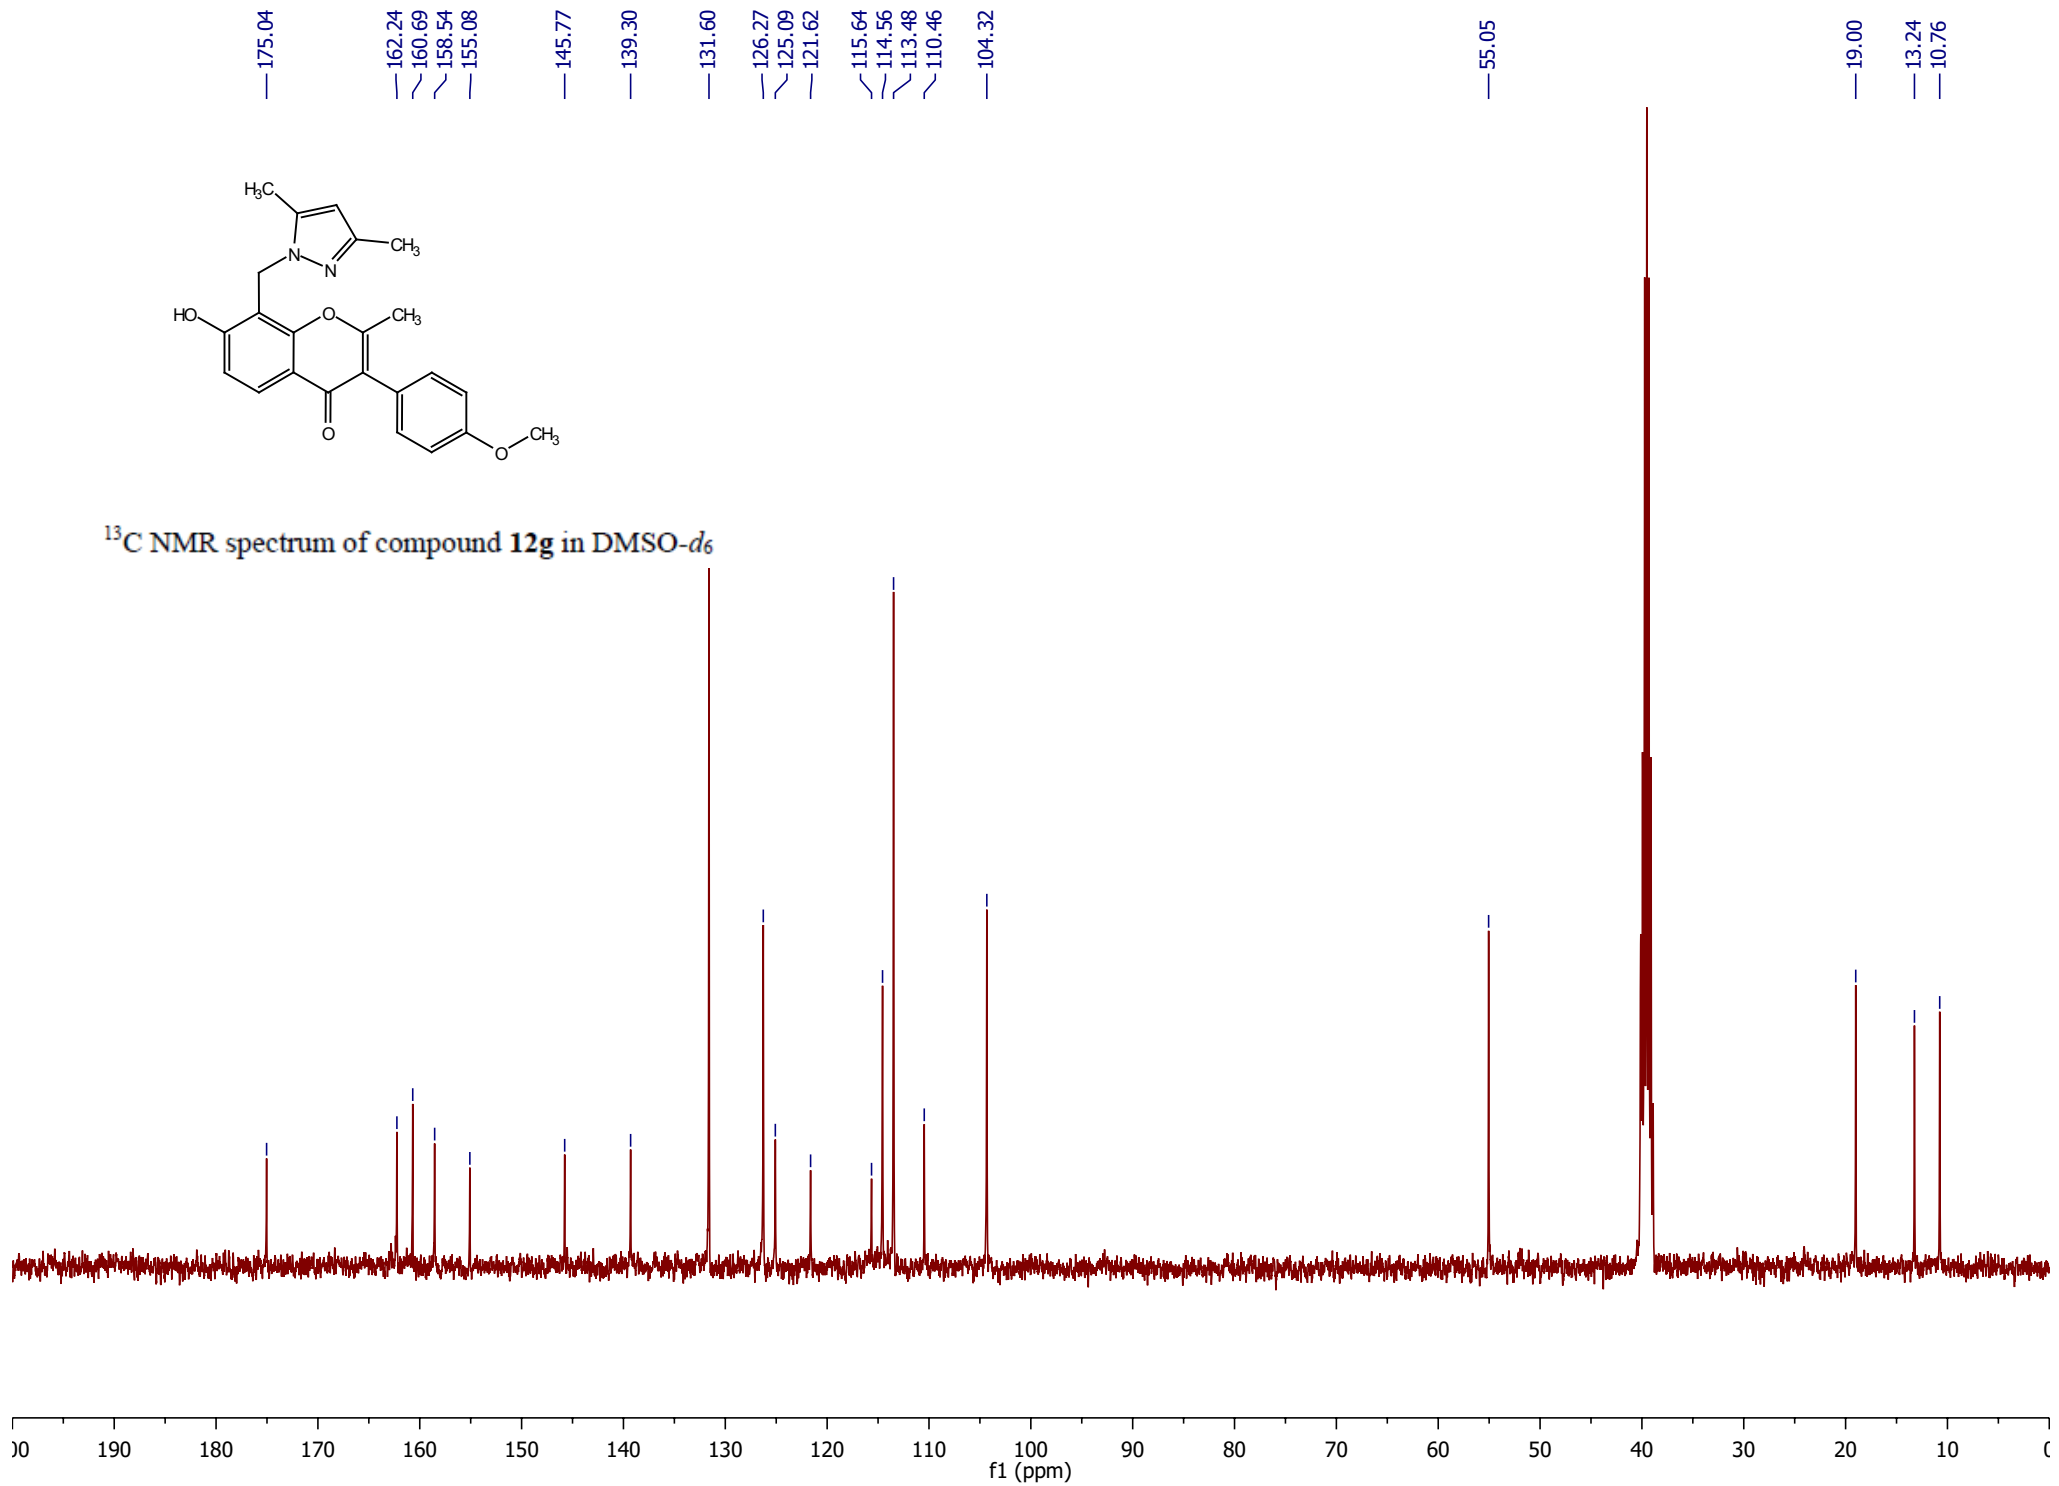

—11.61

7.95  
7.93

7.21  
7.19  
7.11  
7.09  
7.01  
6.99

—5.80

—5.28

—3.80

—2.35

—2.02

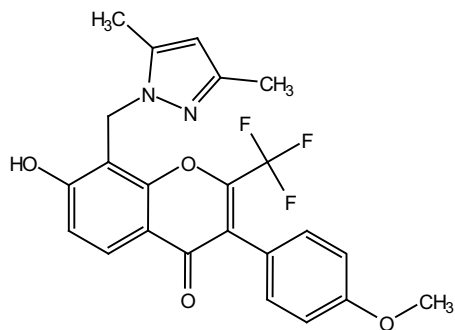

<sup>1</sup>H NMR spectrum of compound 12h in DMSO-*d*<sub>6</sub>

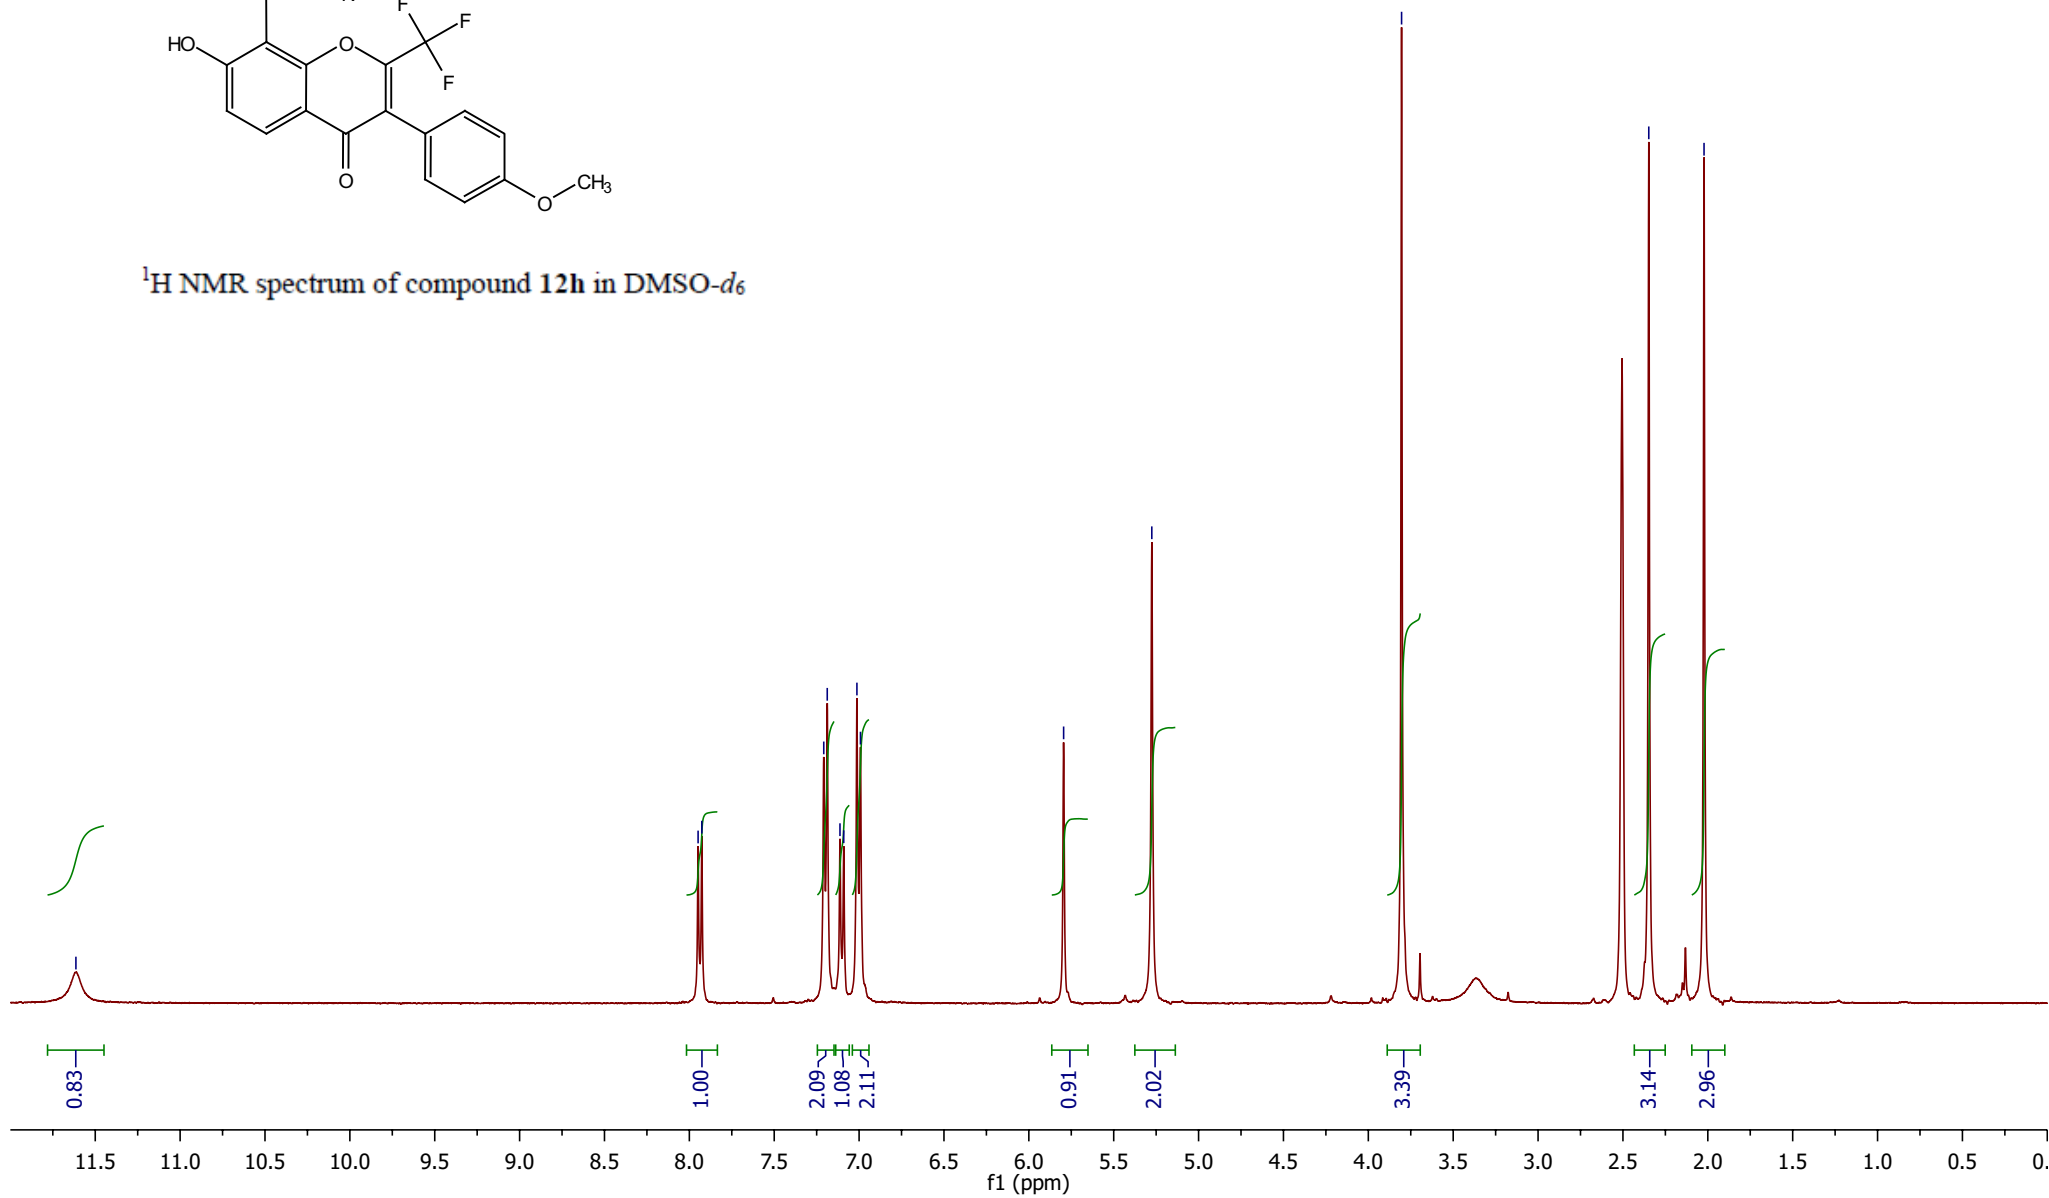

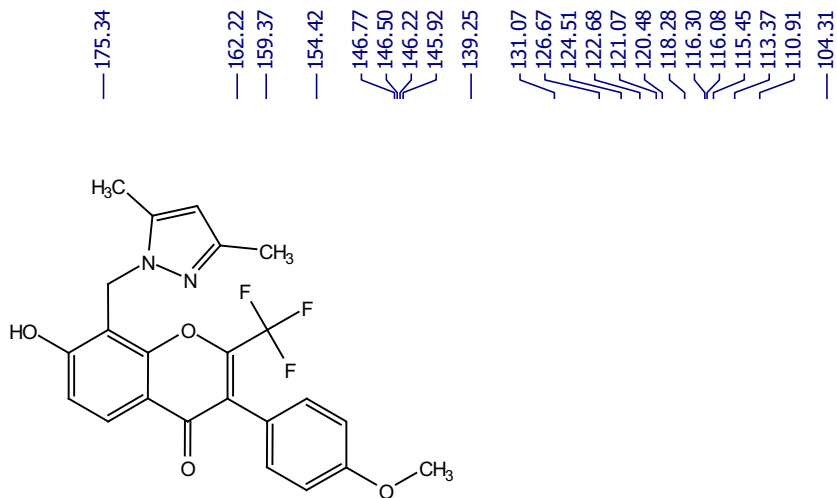

$^{13}\text{C}$  NMR spectrum of compound 12h in  $\text{DMSO-}d_6$

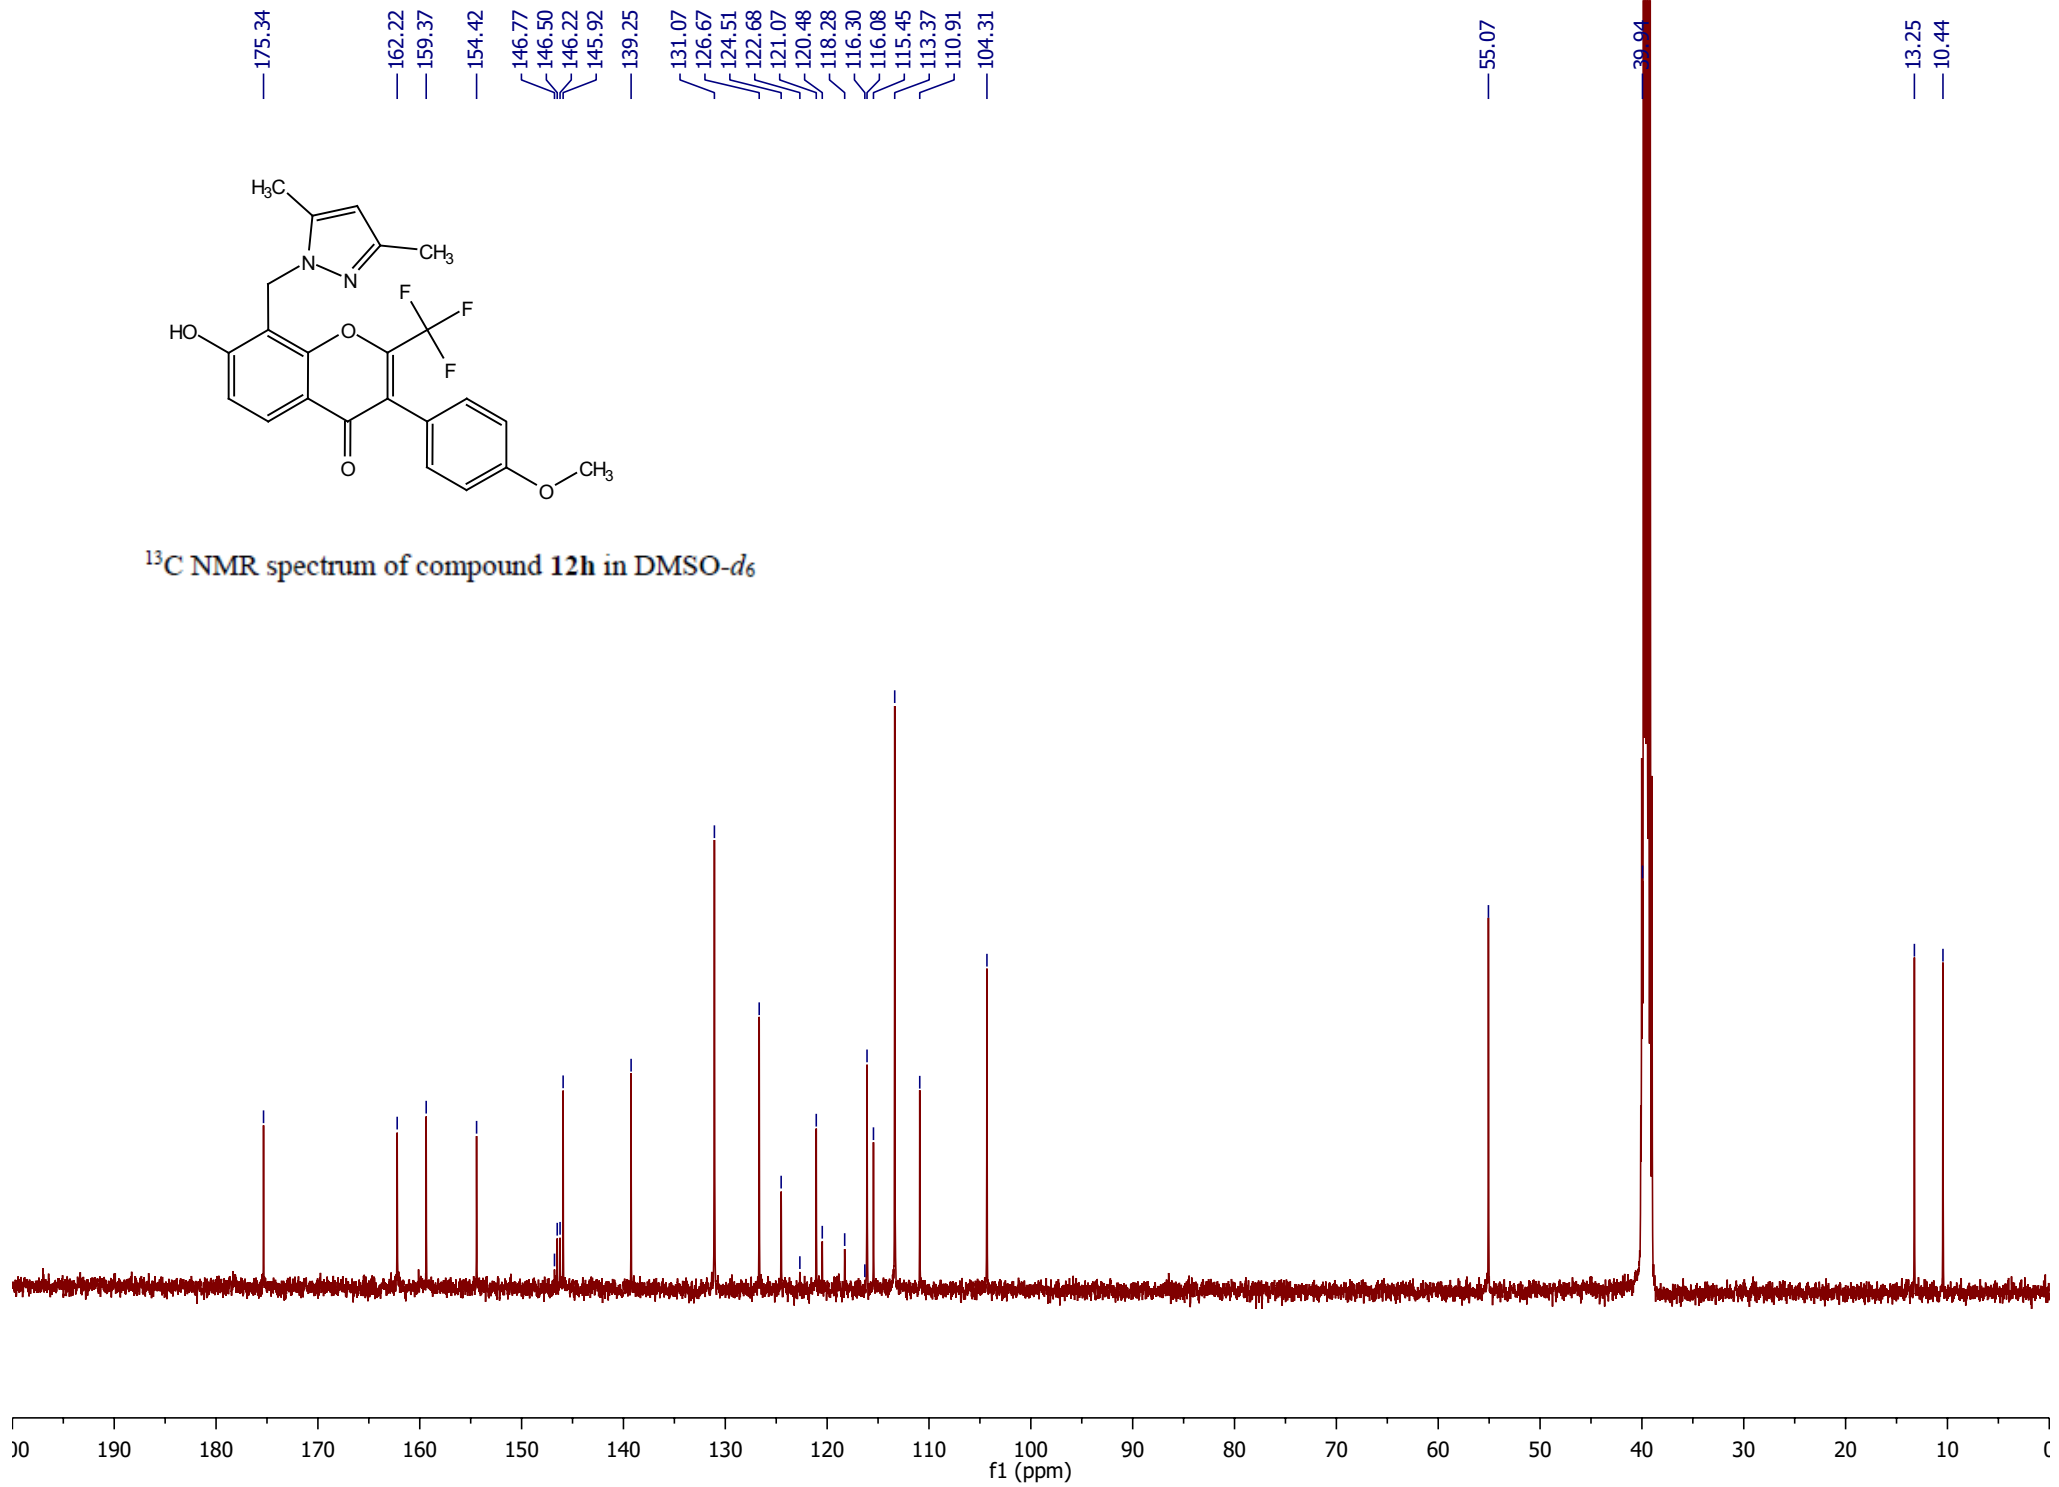

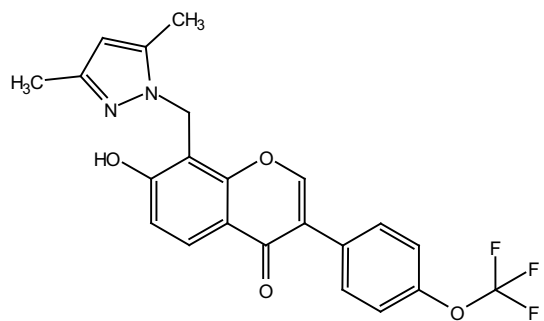

<sup>1</sup>H NMR spectrum of compound **12i** in DMSO-*d*<sub>6</sub>

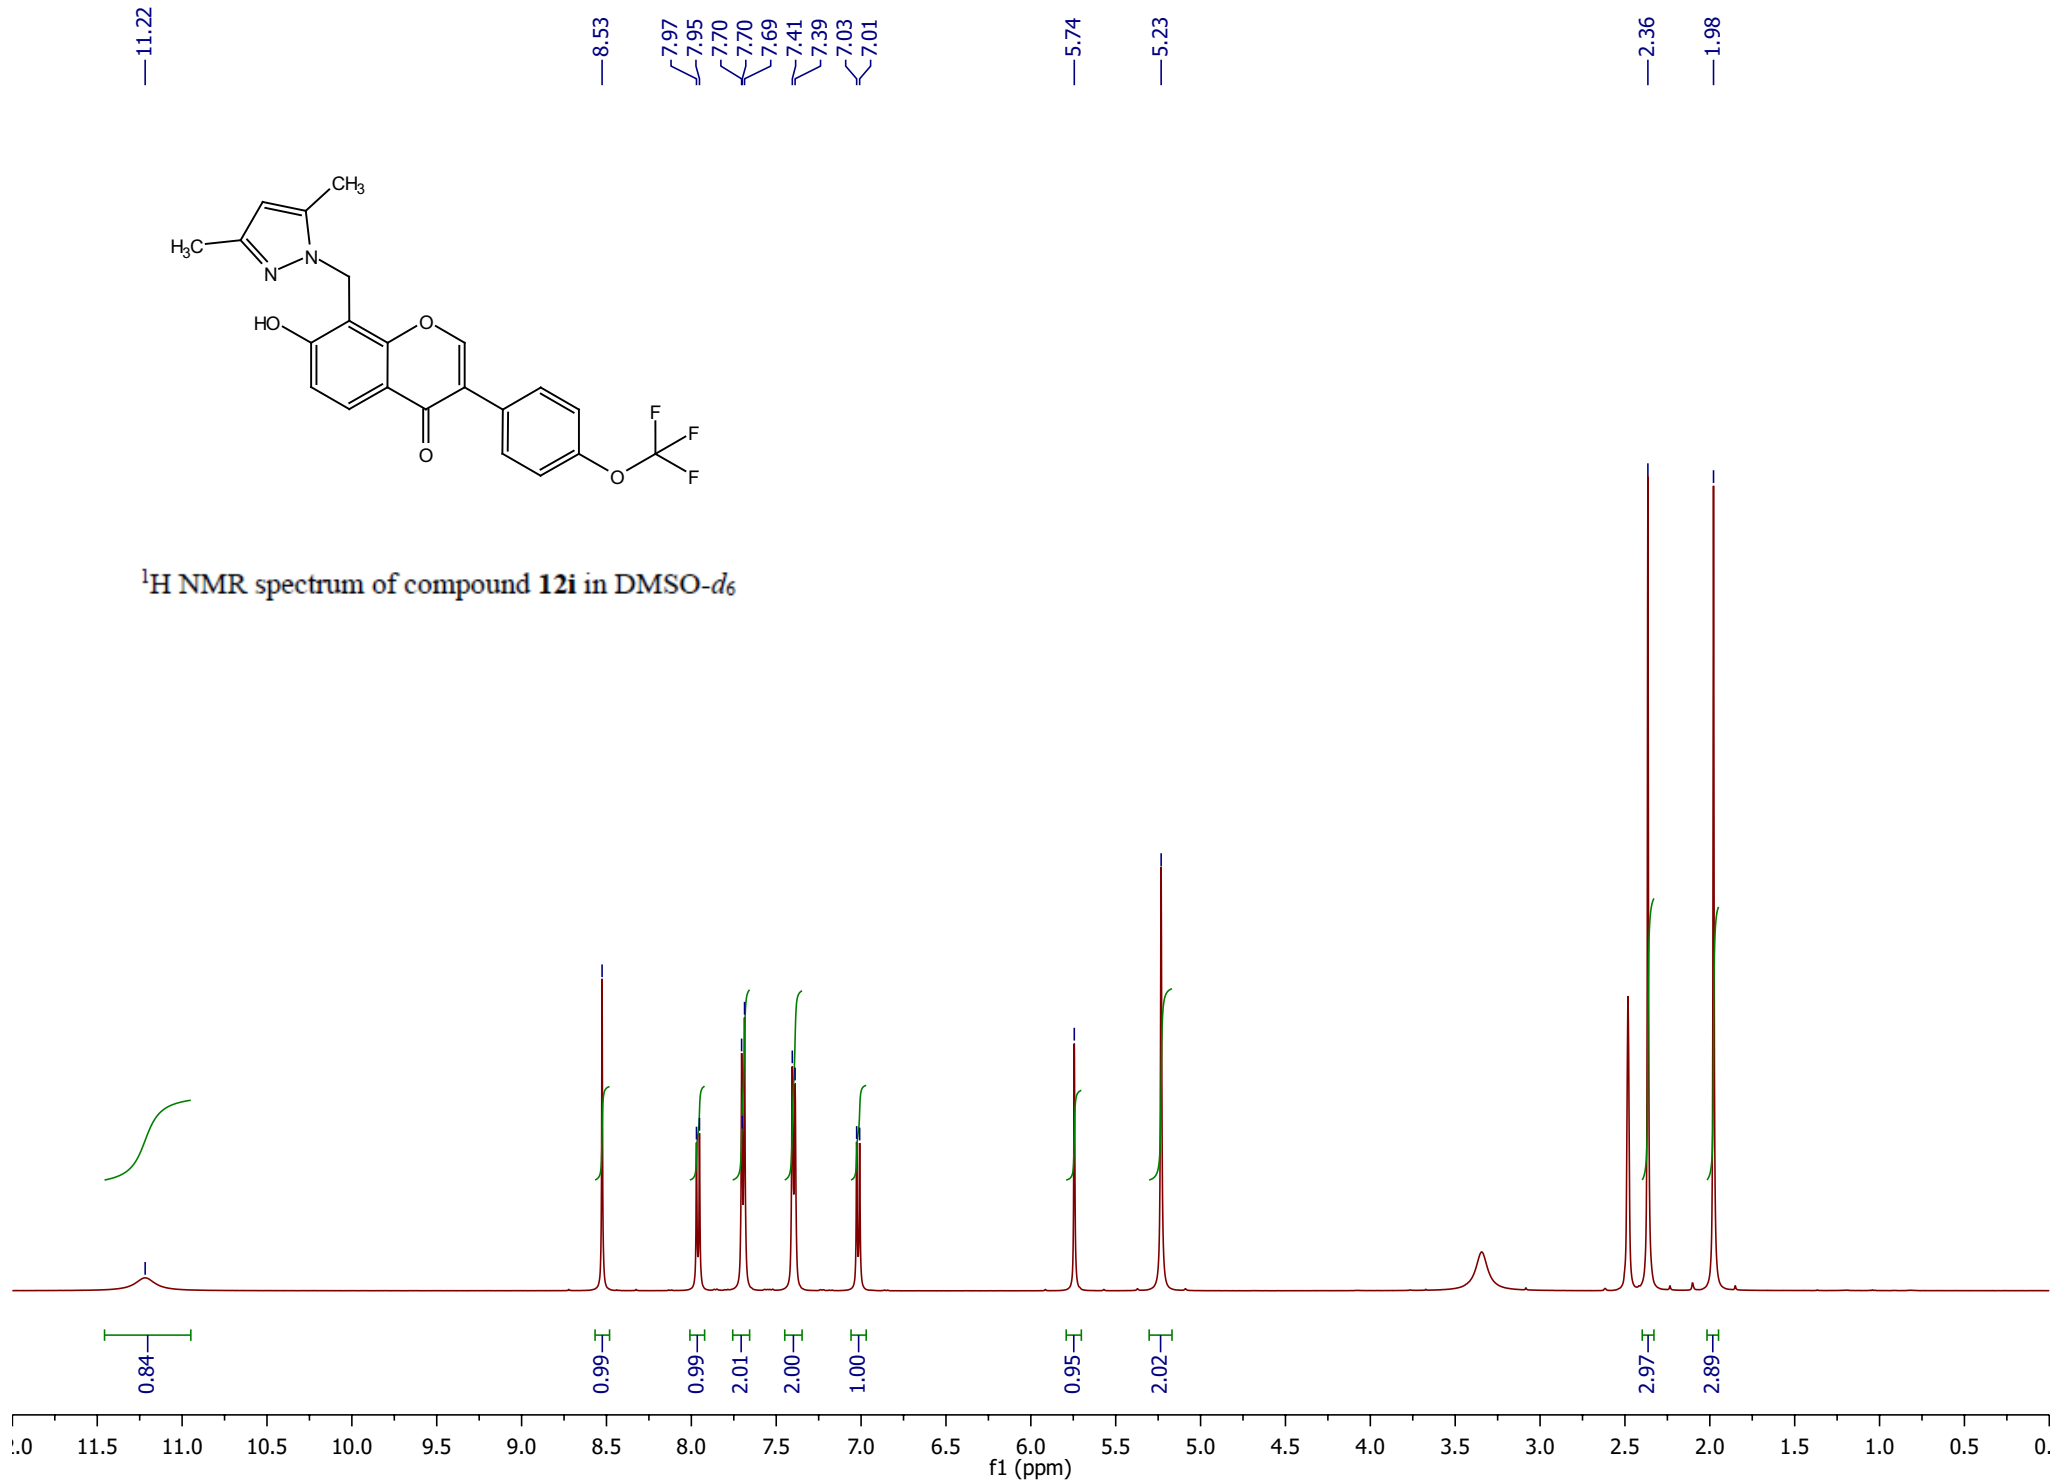

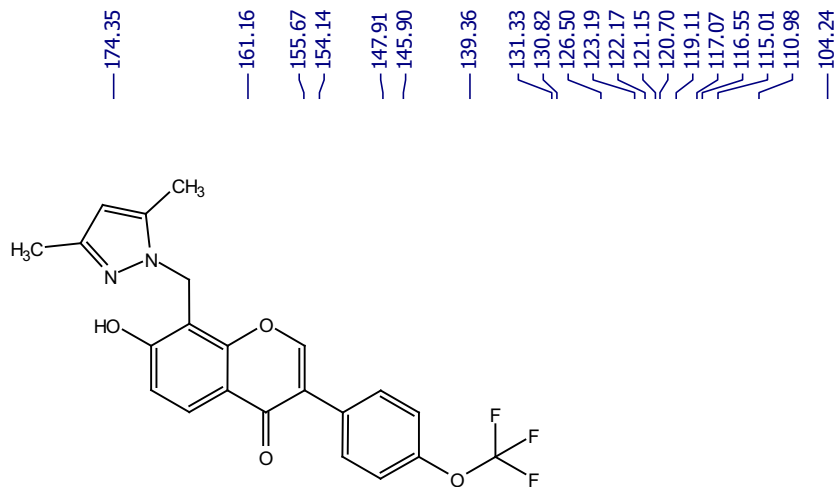

$^{13}\text{C}$  NMR spectrum of compound **12i** in  $\text{DMSO-}d_6$

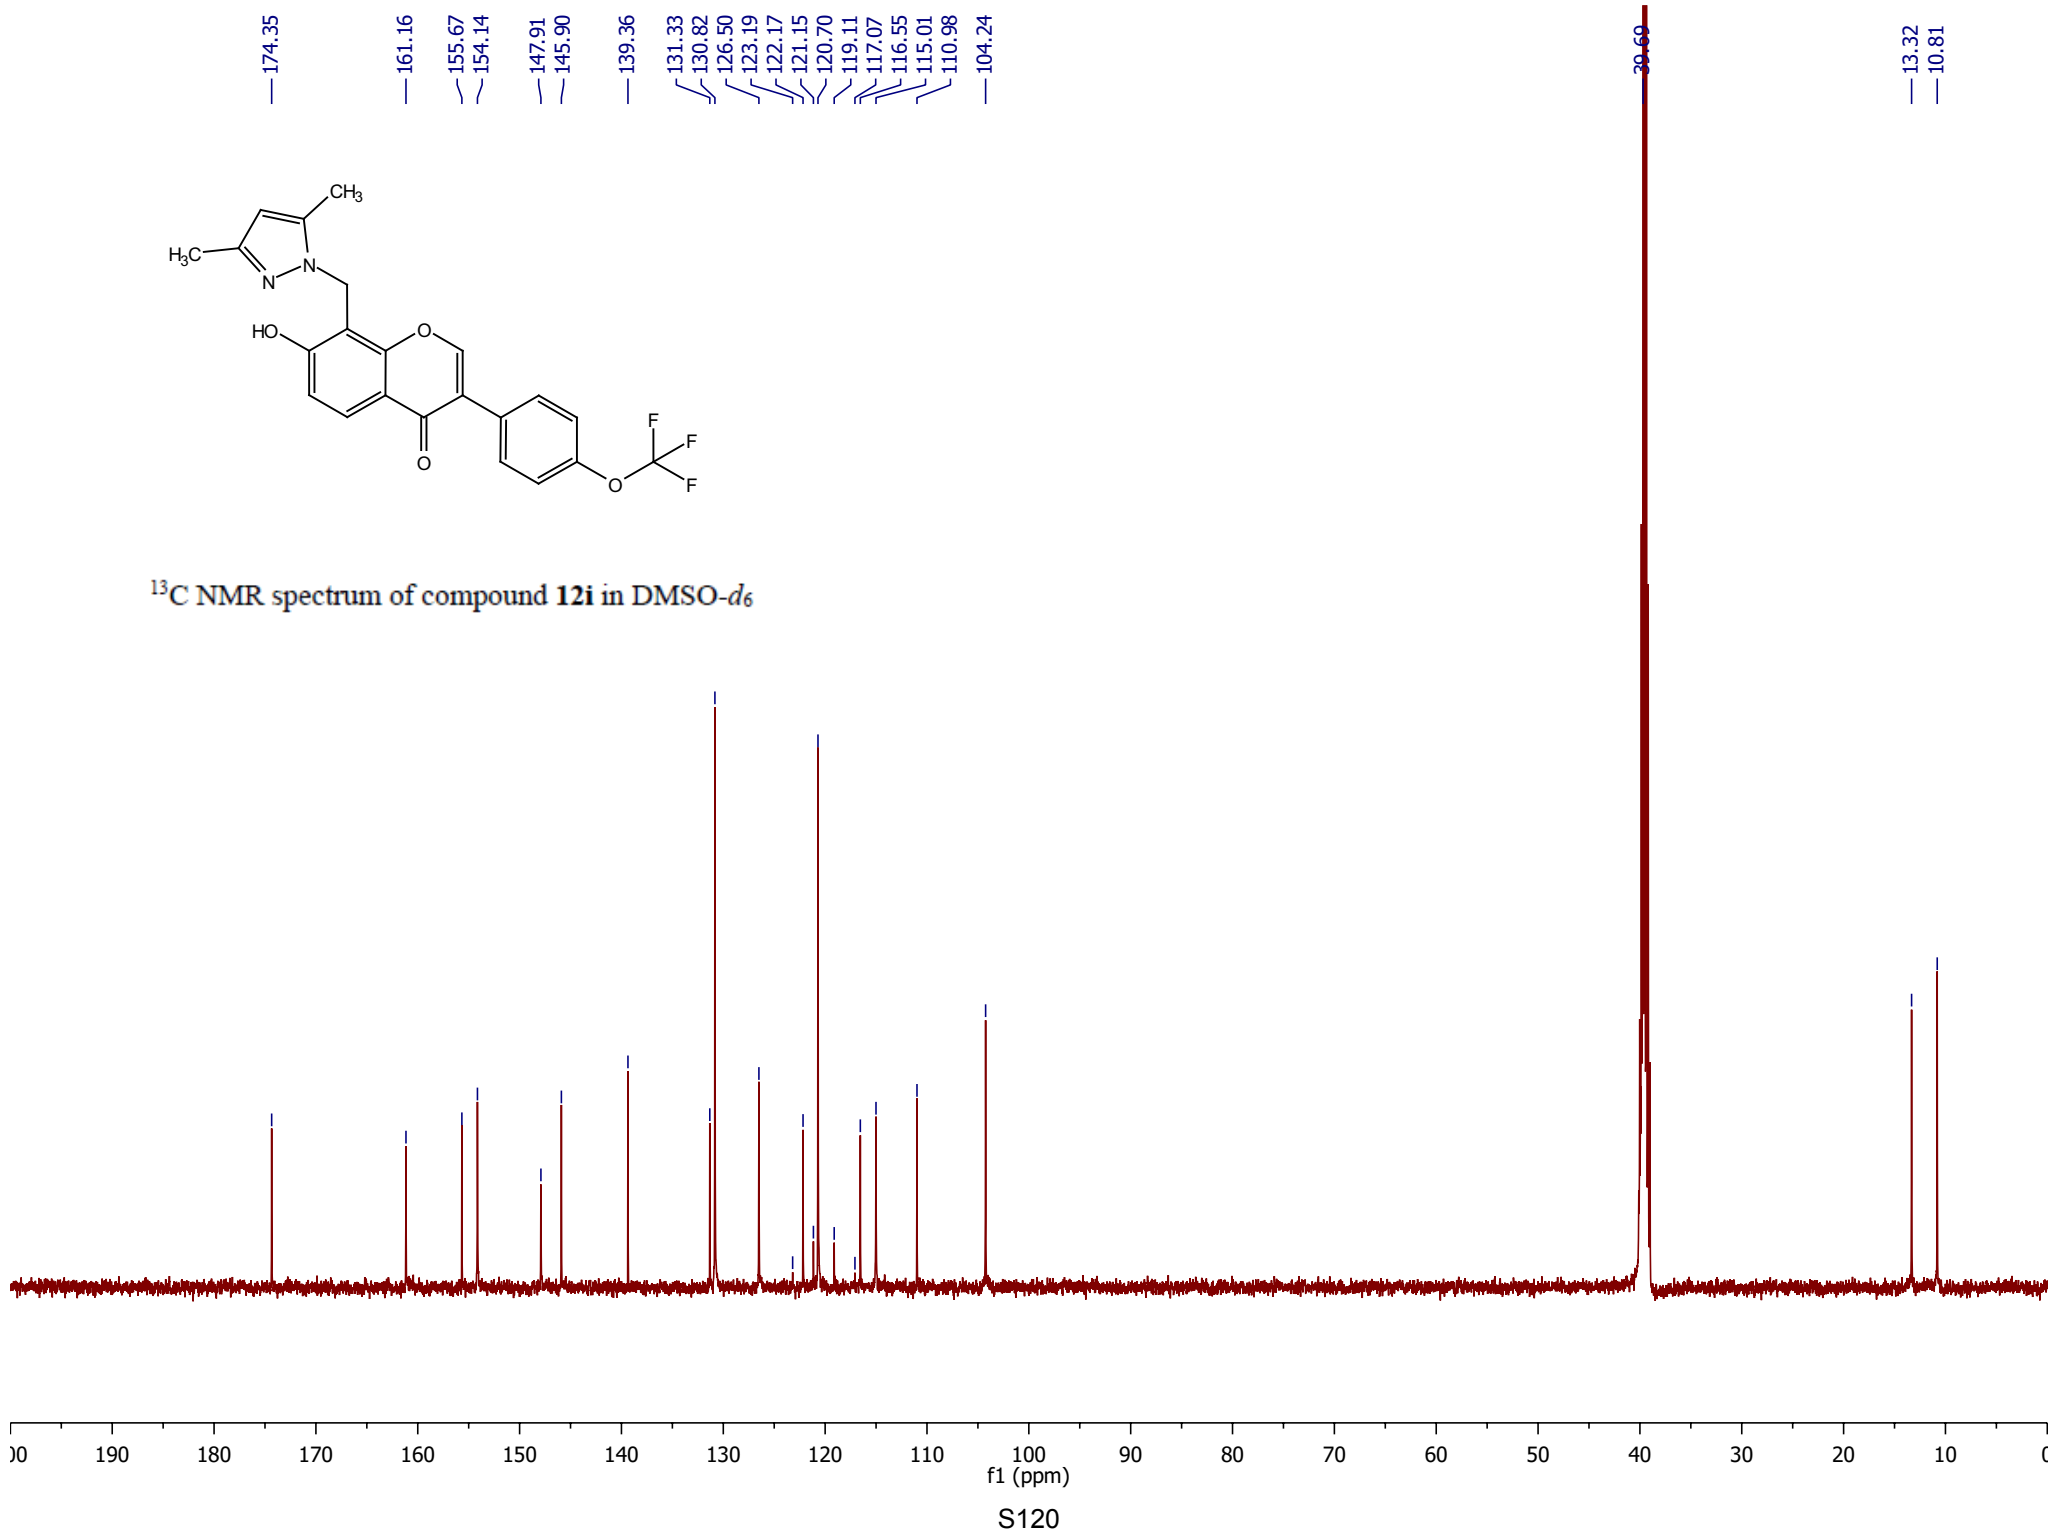



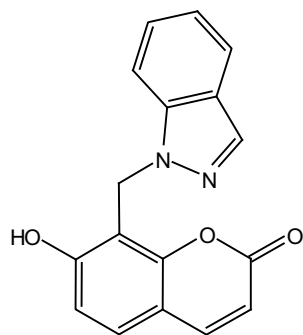

$^1\text{H}$  NMR spectrum of compound 13a in  $\text{DMSO-}d_6$

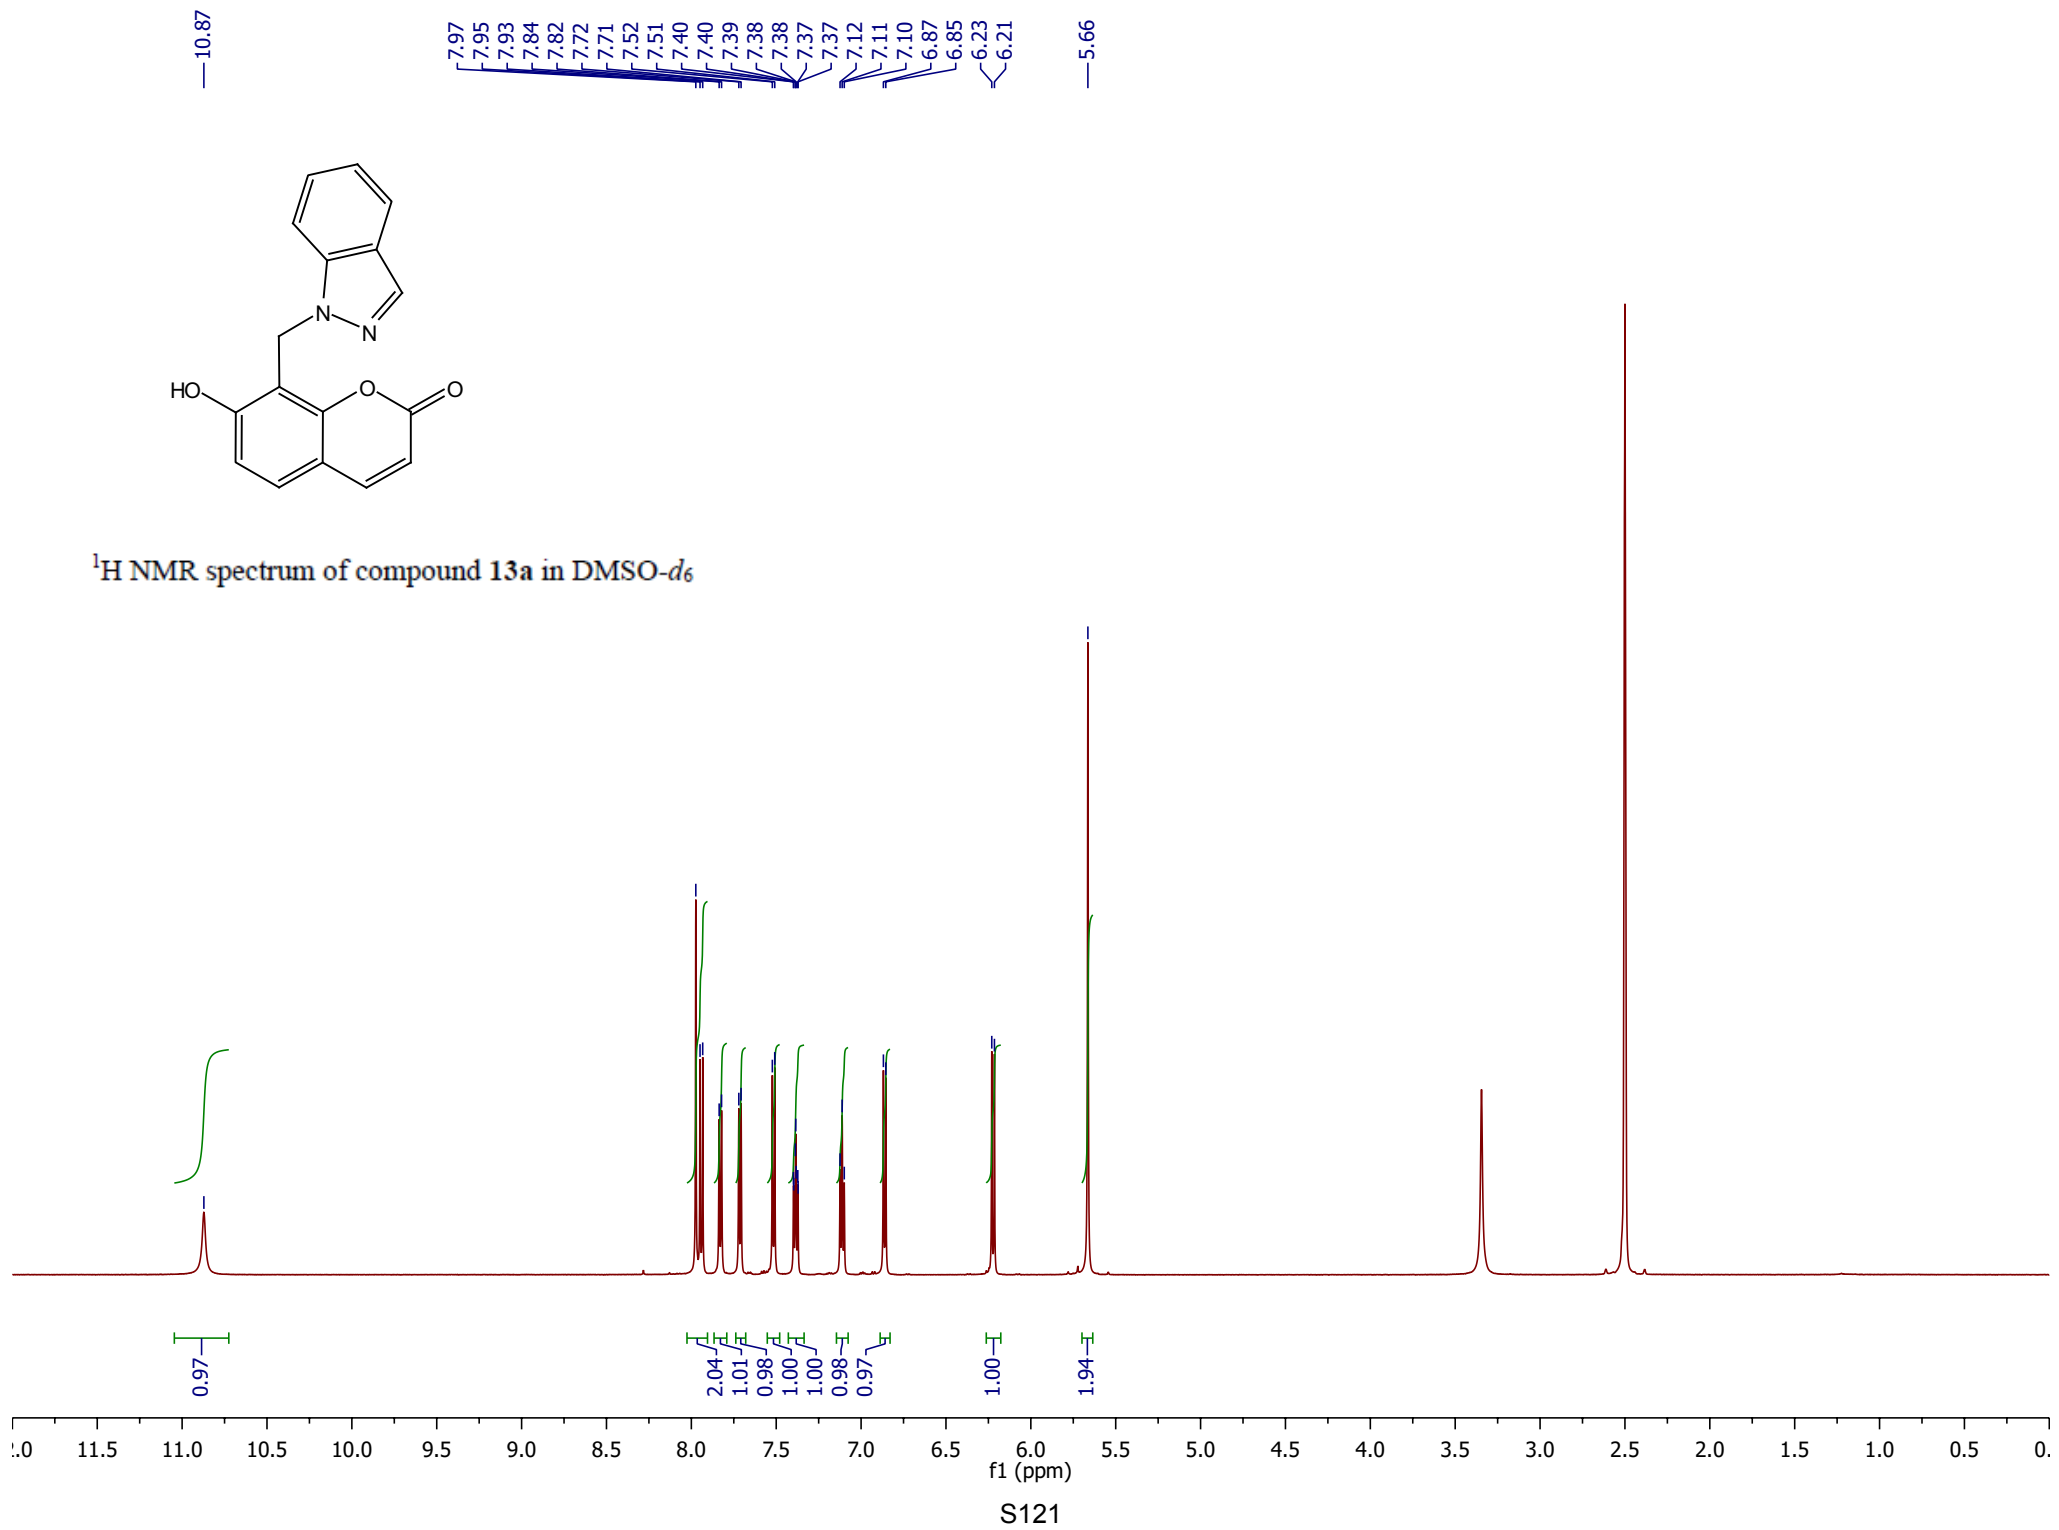

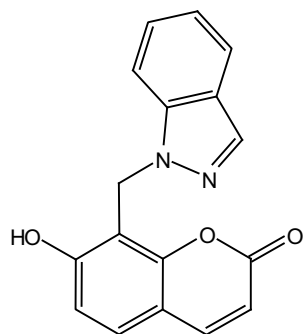

$^{13}\text{C}$  NMR spectrum of compound 13a in  $\text{DMSO-}d_6$

160.03  
159.86  
154.02  
144.80  
139.45  
132.55  
129.20  
125.71  
123.25  
120.54  
120.18  
112.52  
111.25  
110.21  
110.18  
40.16

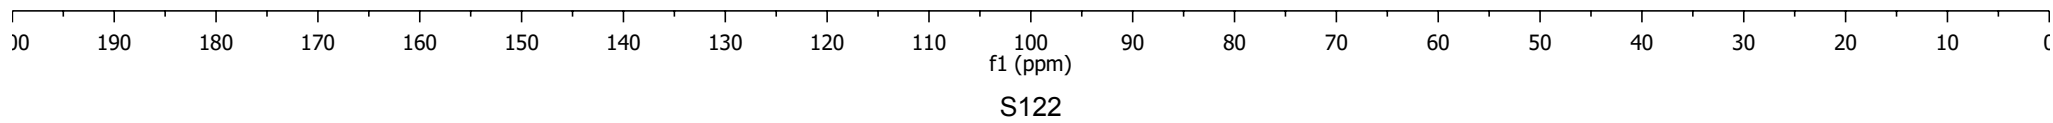

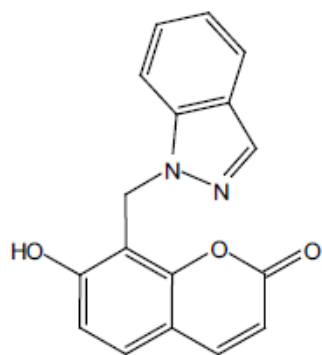

$^1\text{H}$ - $^{13}\text{C}$  HSQC spectrum of  
compound 13a in  $\text{DMSO-}d_6$

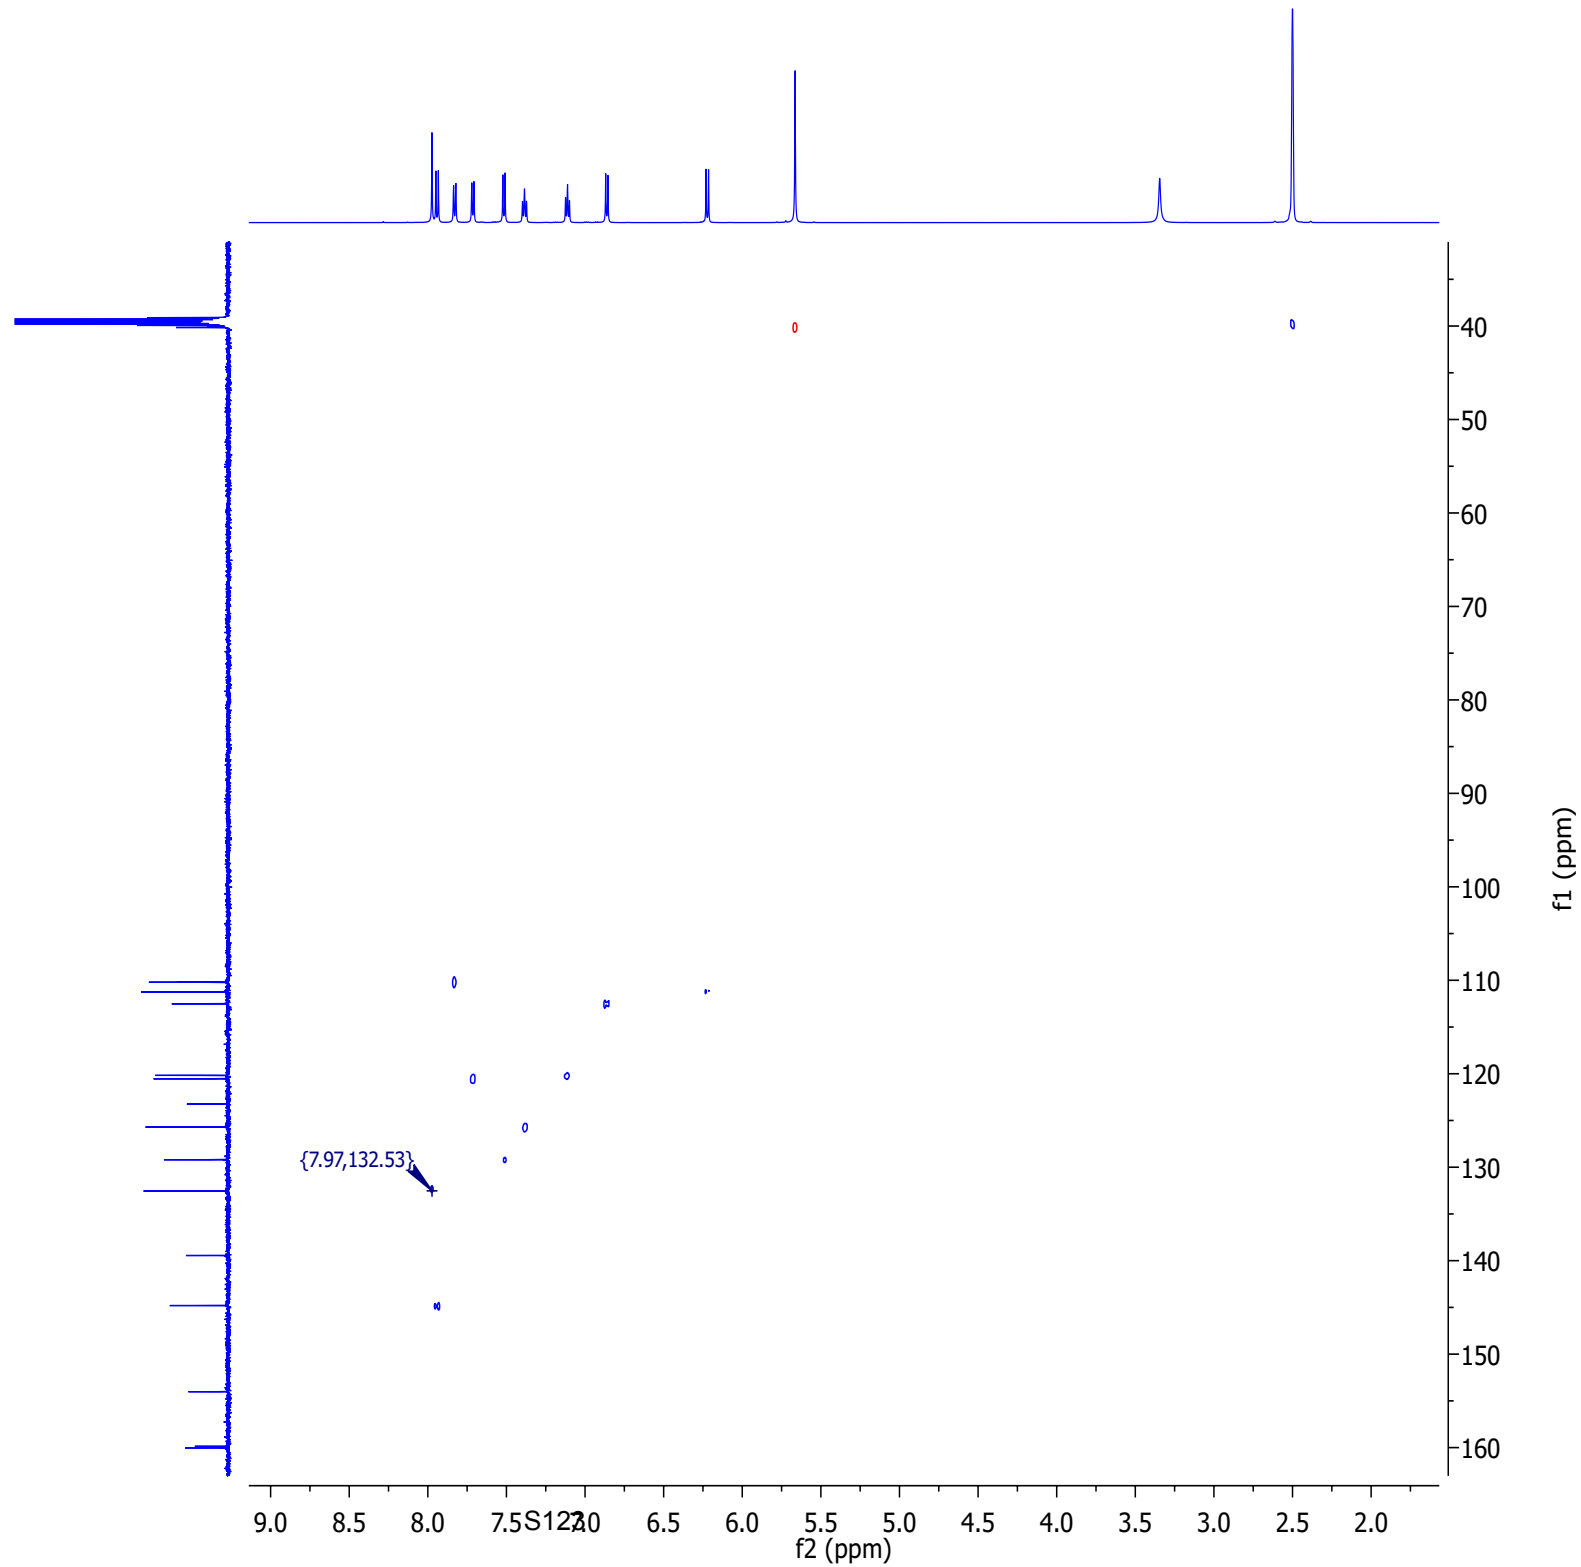

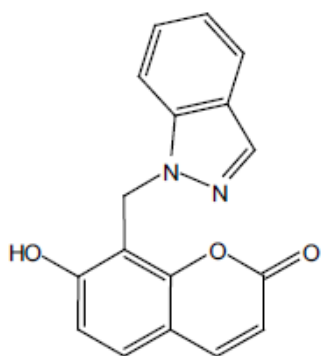

$^1\text{H}$ - $^{13}\text{C}$  HMBC spectrum of  
compound 13a in  $\text{DMSO-}d_6$

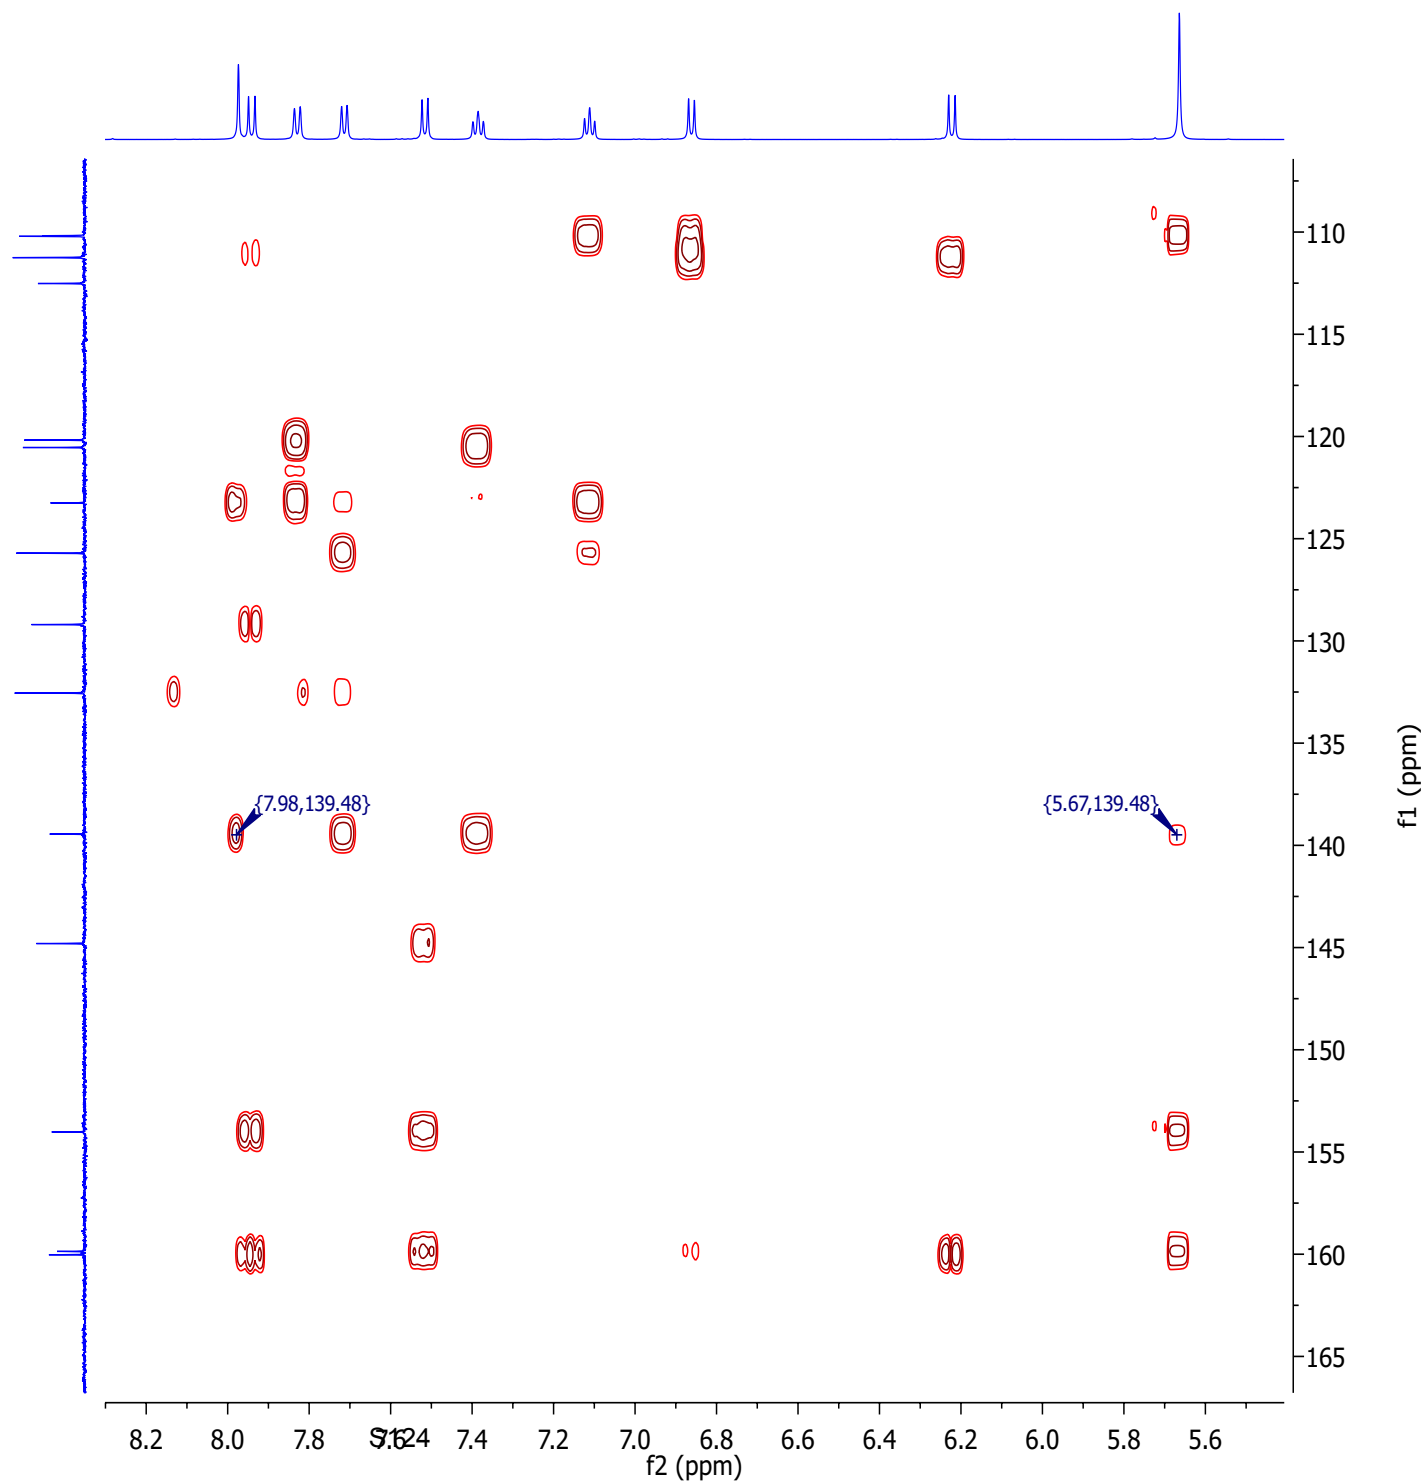

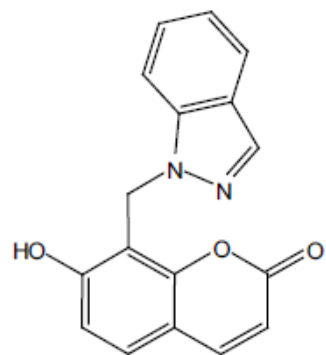

1D NOESY spectrum of compound 13a in DMSO-*d*<sub>6</sub>

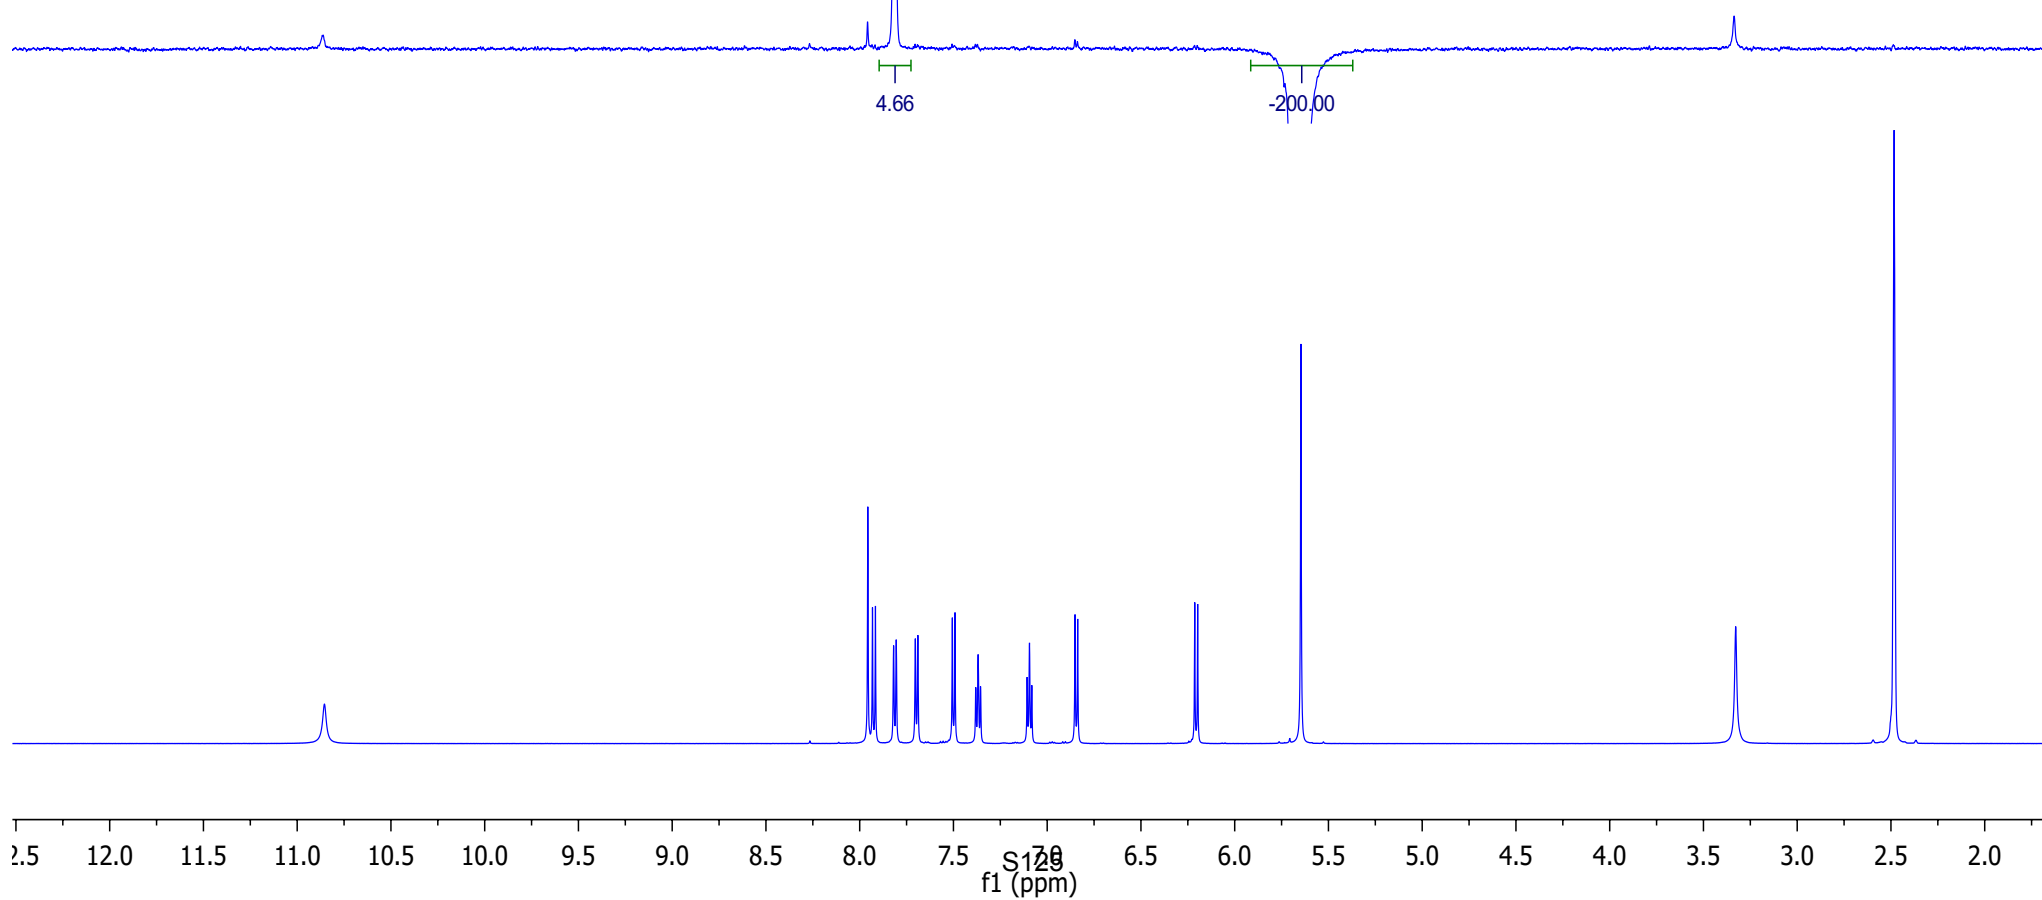

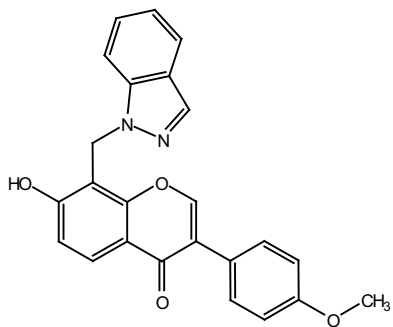

<sup>1</sup>H NMR spectrum of compound 13b in DMSO-*d*<sub>6</sub>

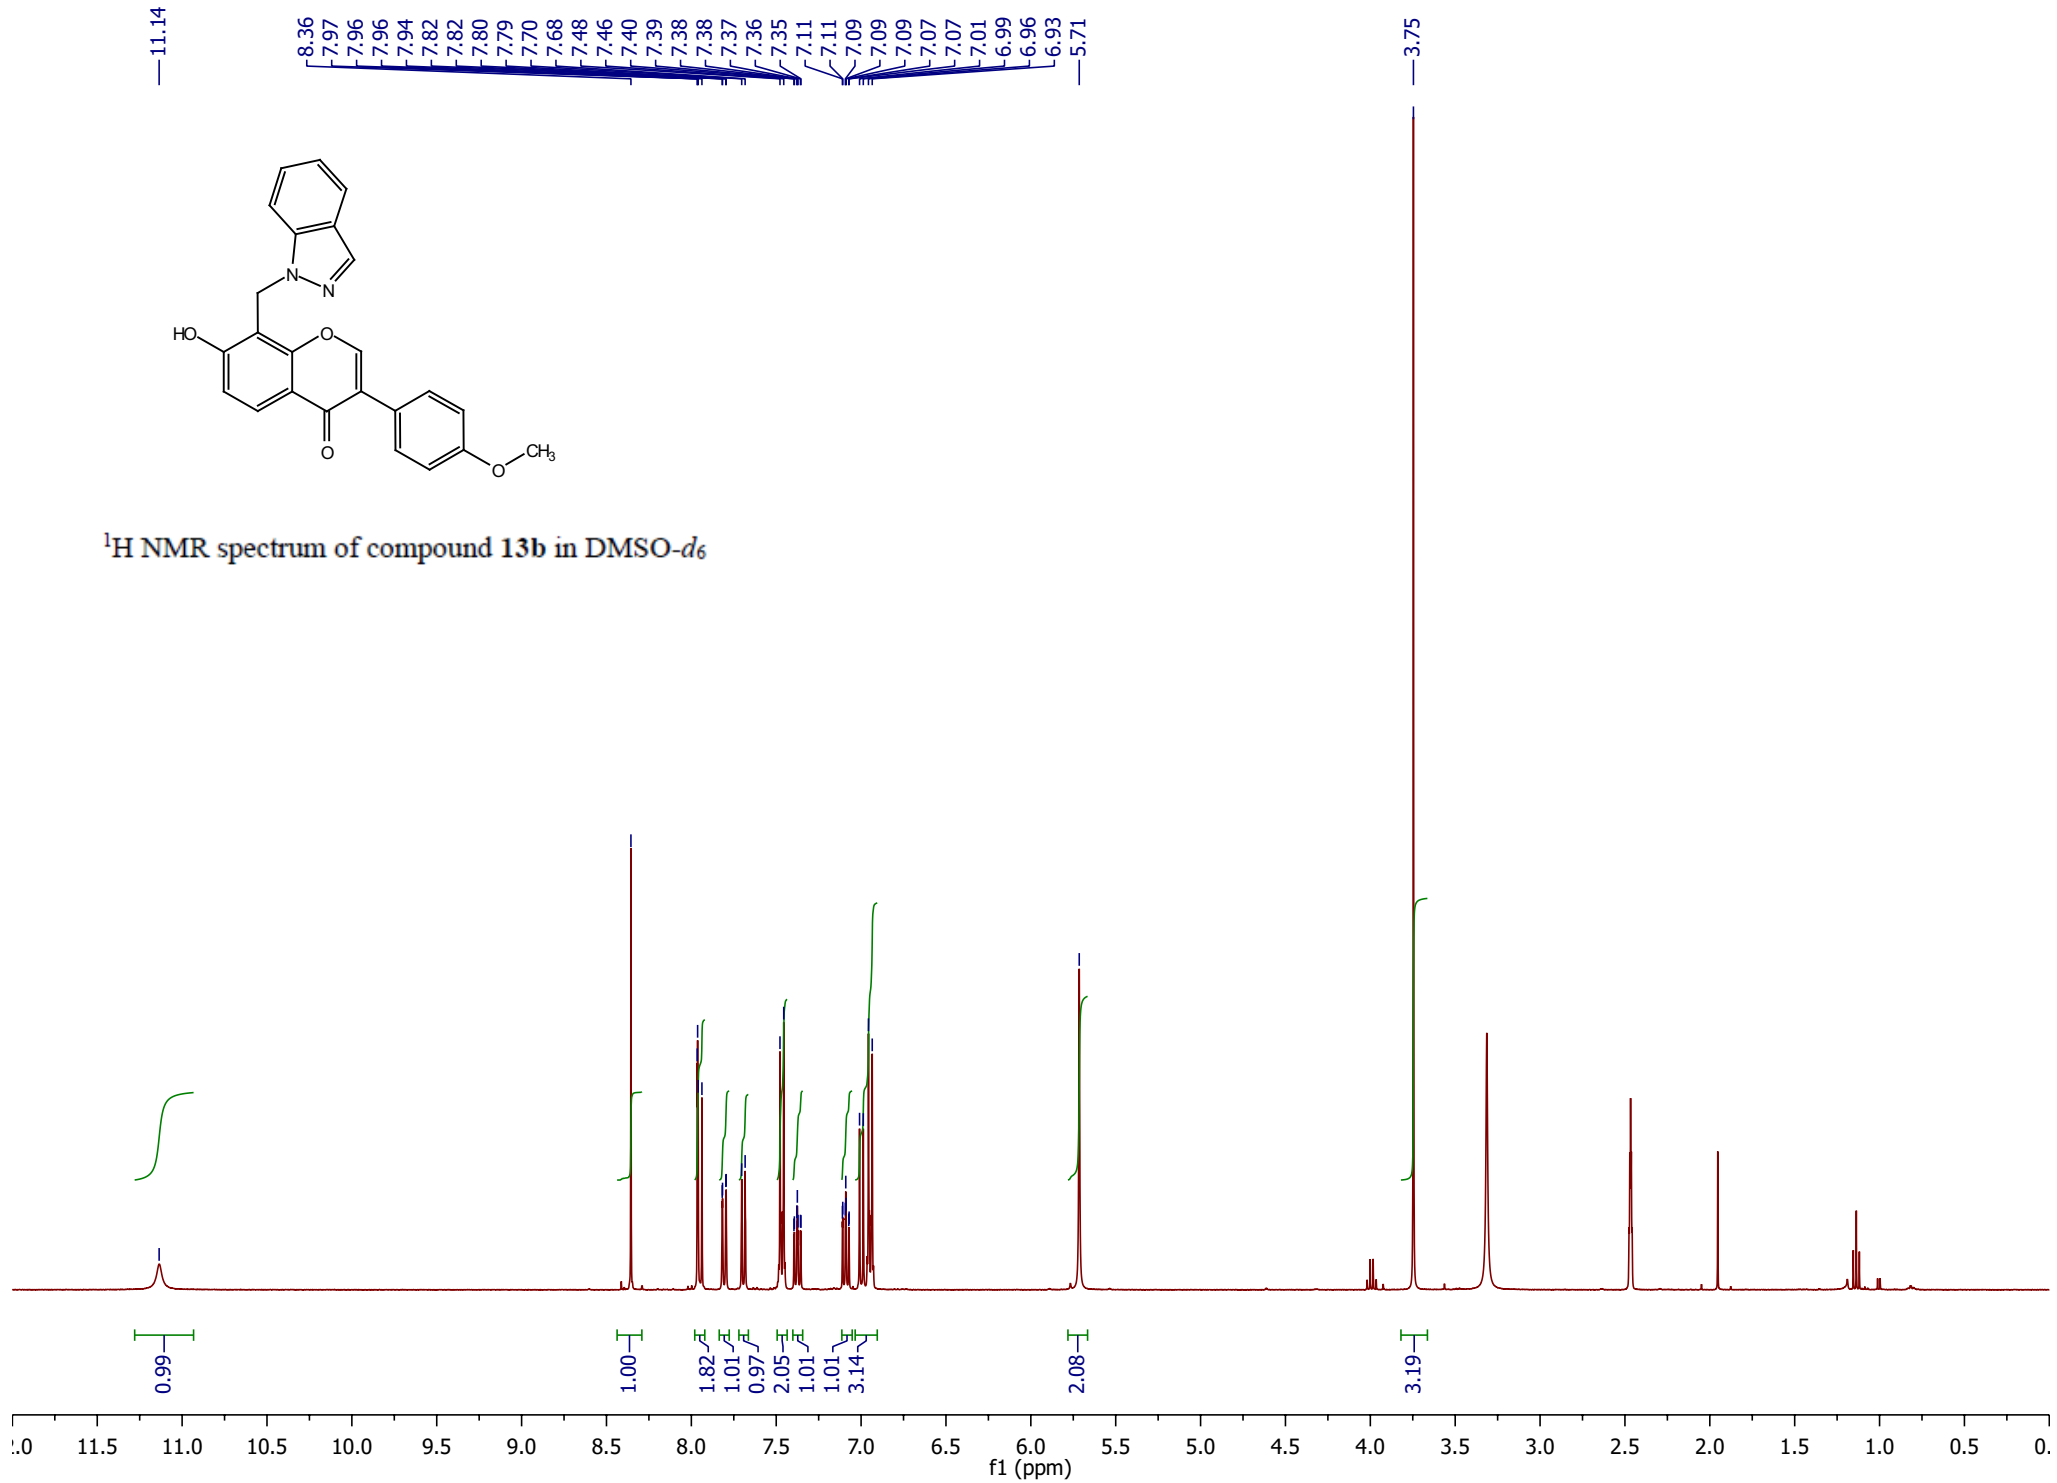

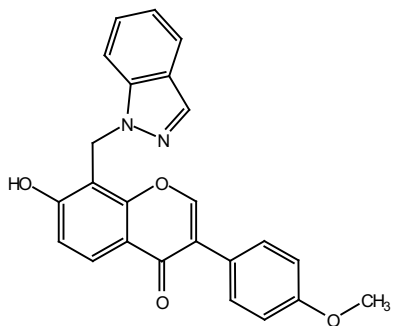

<sup>13</sup>C NMR spectrum of compound 13b in DMSO-*d*<sub>6</sub>

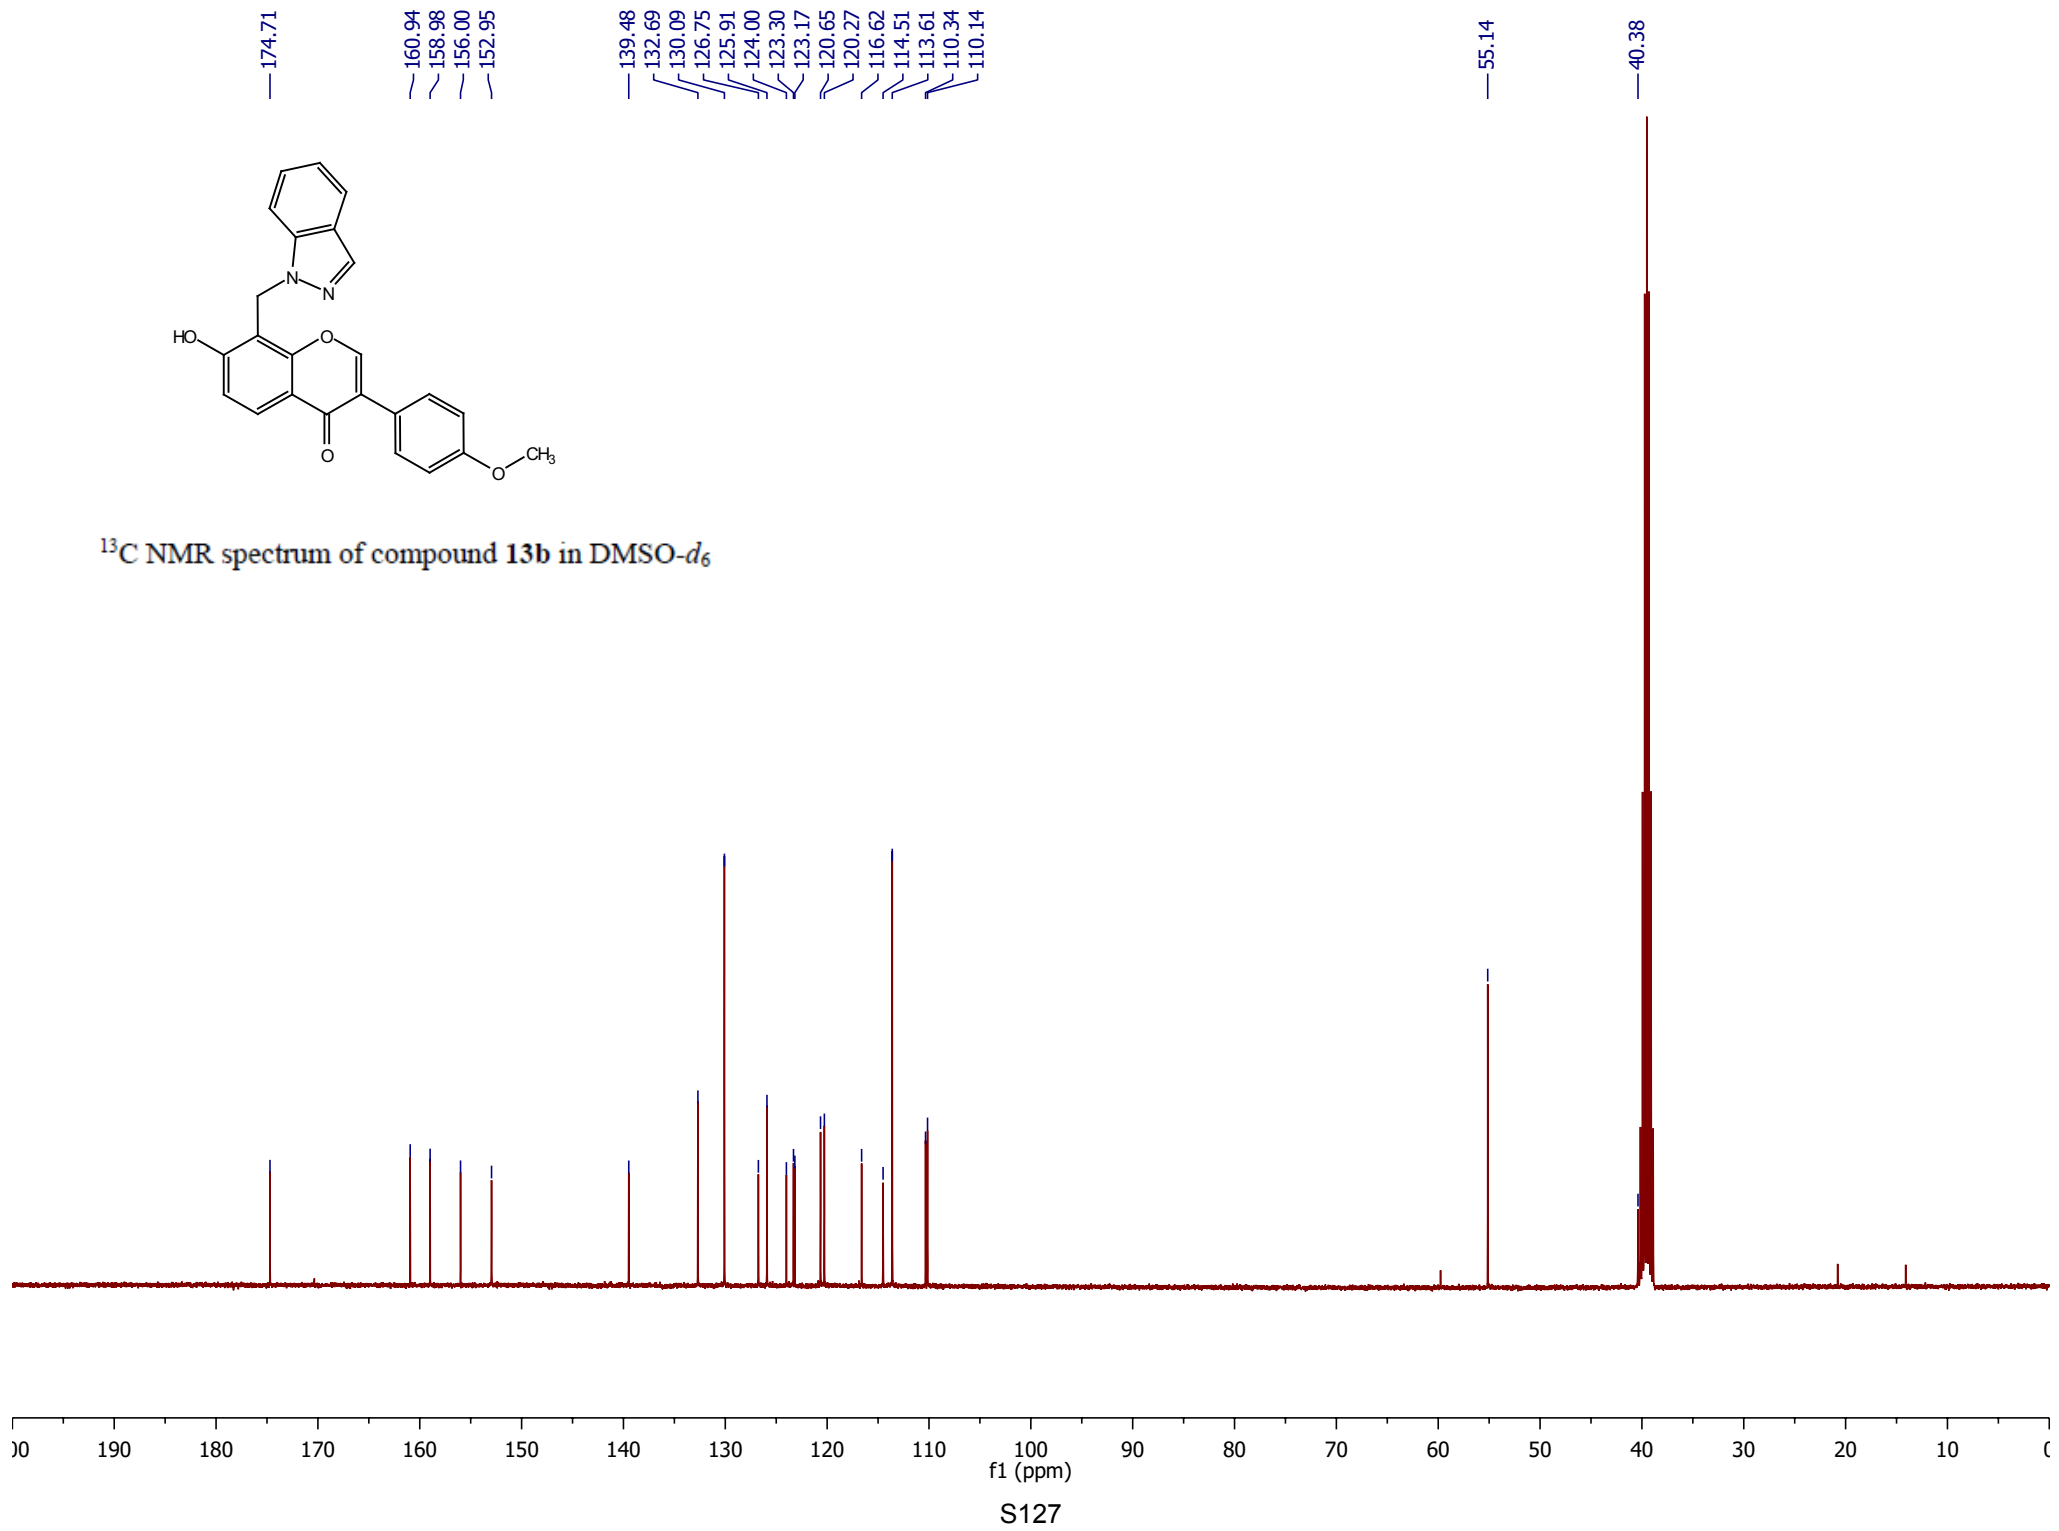

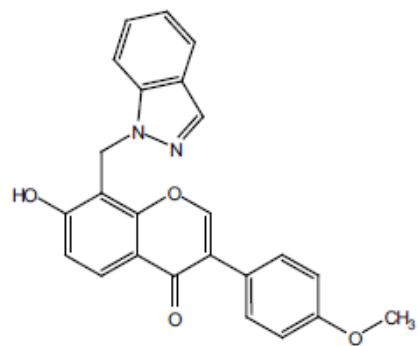

$^1\text{H}$ - $^{13}\text{C}$  HSQC spectrum of  
compound 13b in  $\text{DMSO-}d_6$

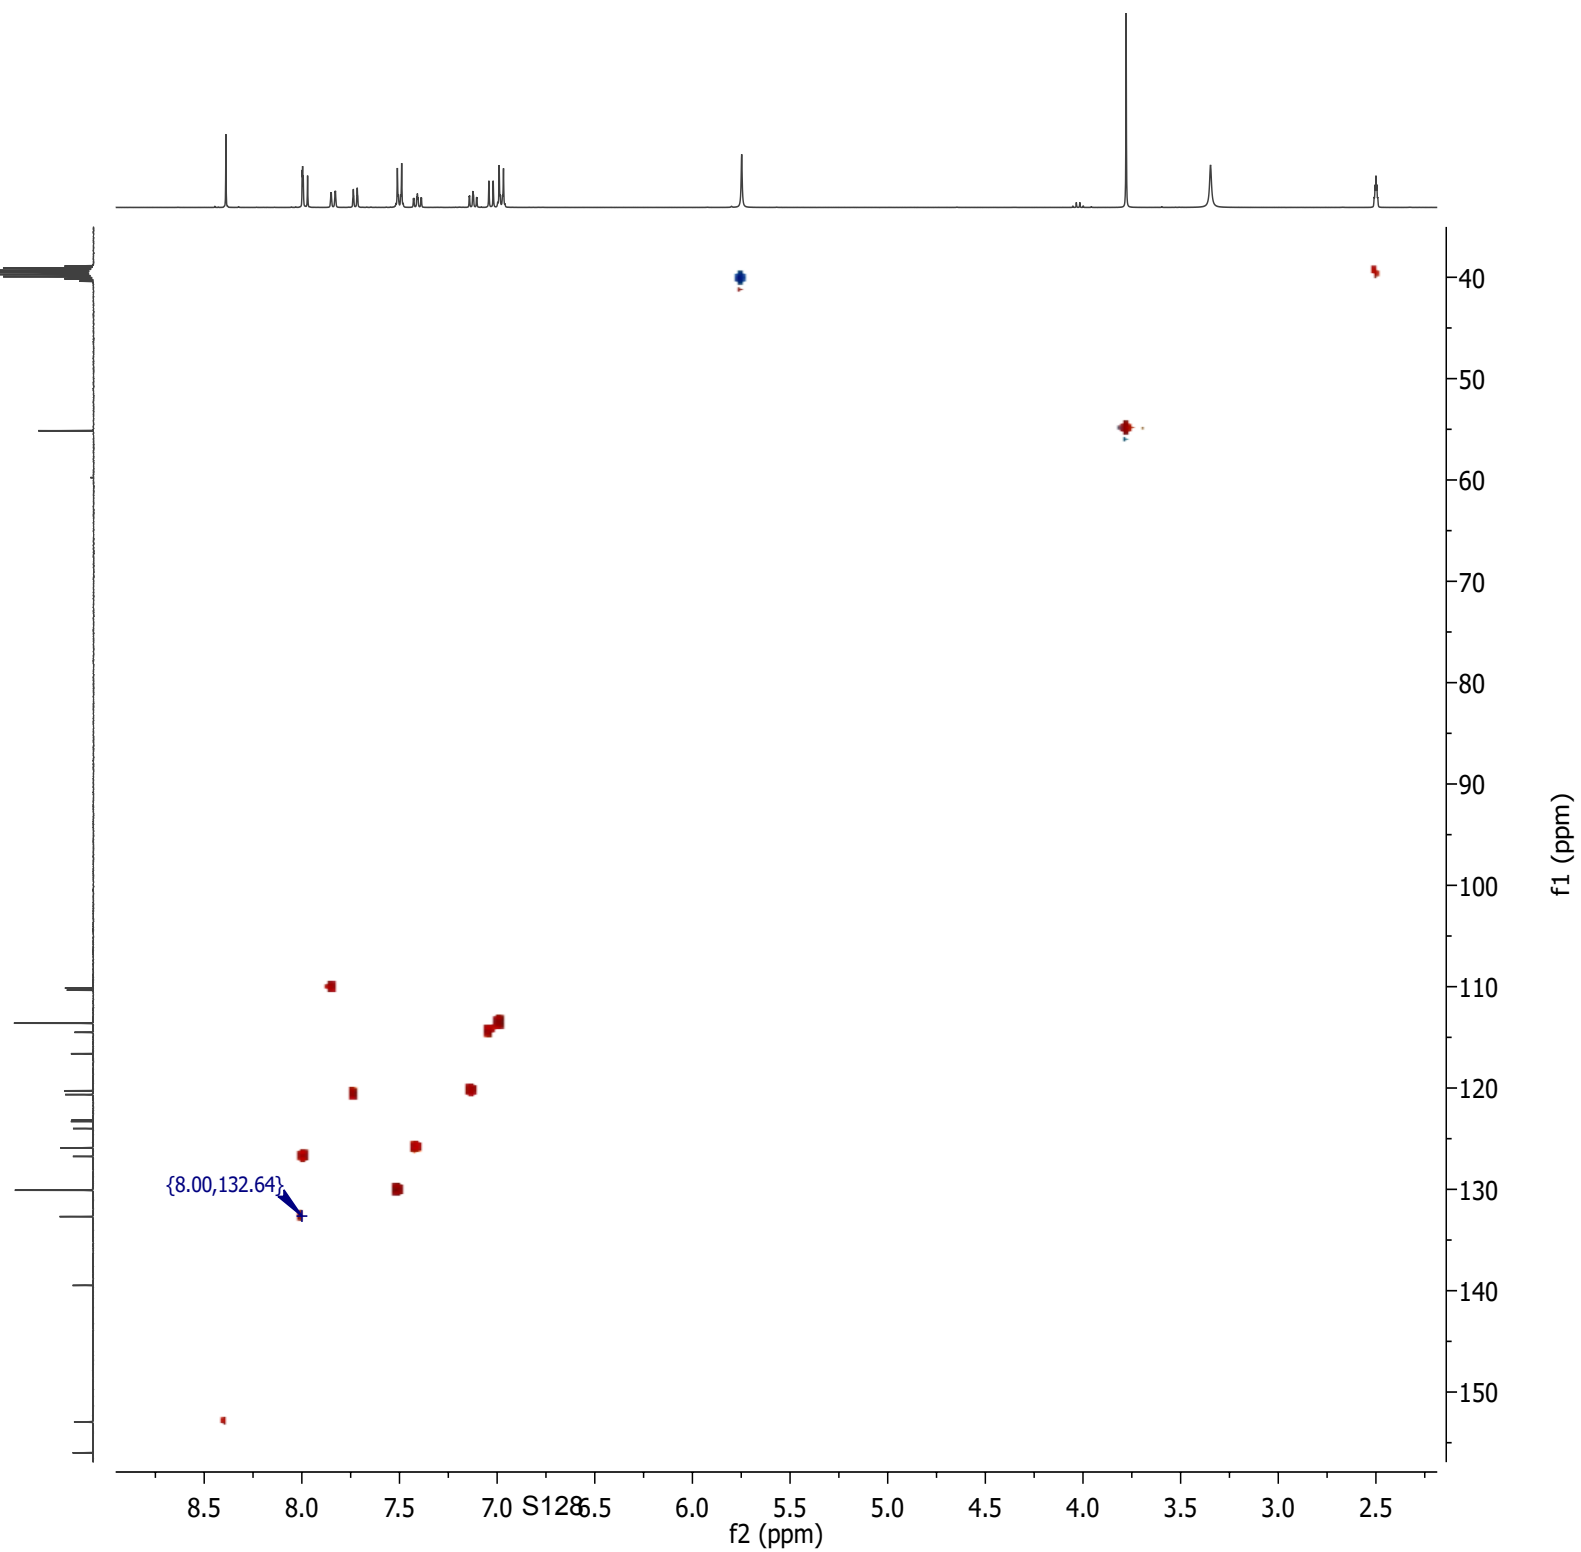



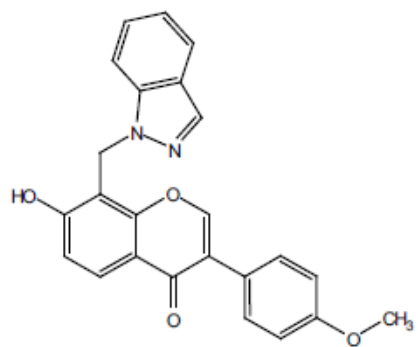

$^1\text{H}$ - $^{13}\text{C}$  HMBC spectrum of  
compound 13b in  $\text{DMSO-}d_6$

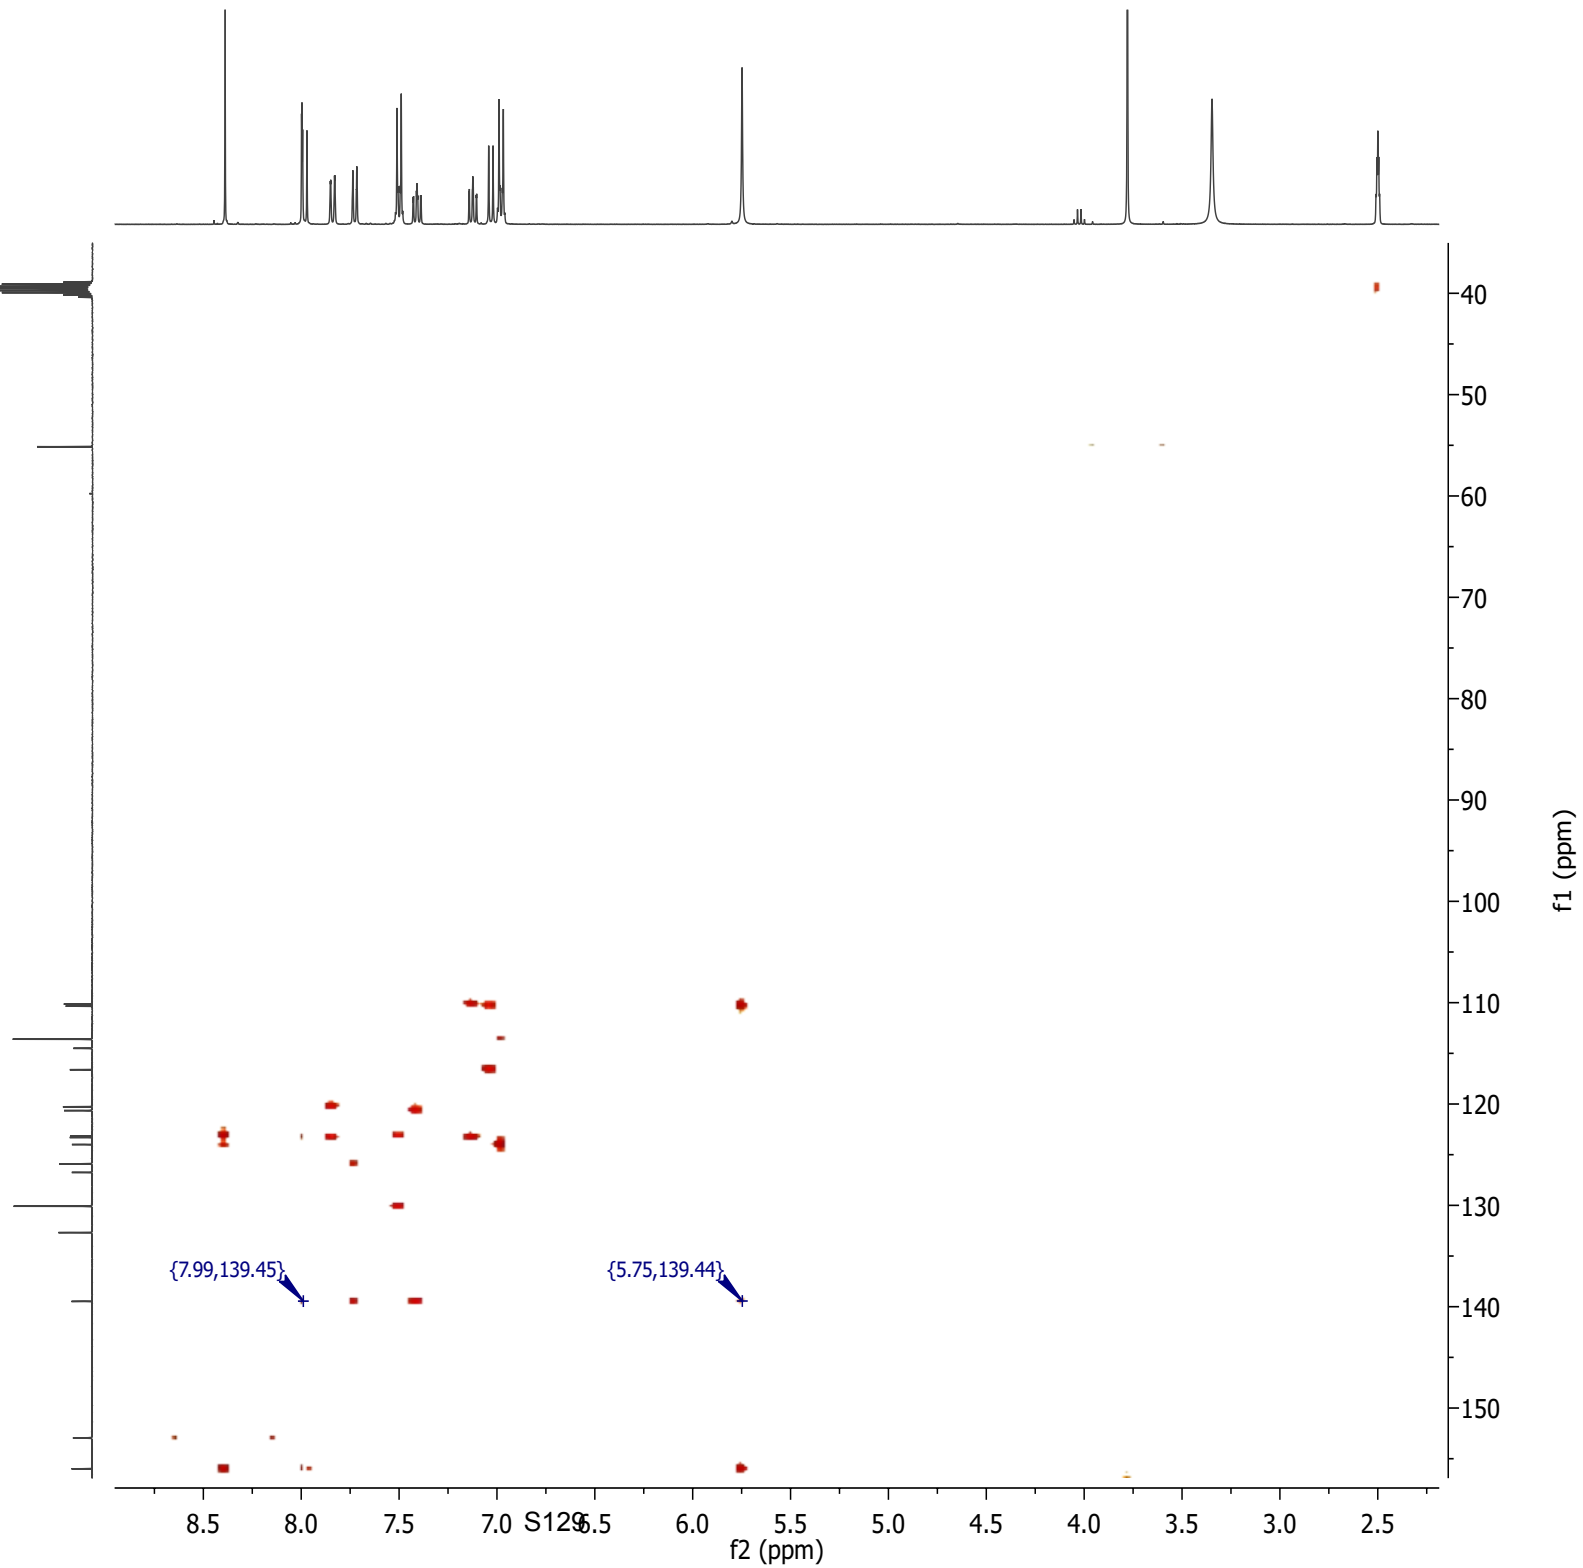

—11.05

—8.28  
7.98  
7.96  
7.67  
7.65  
7.59  
7.57  
7.56  
7.54  
7.20  
7.19  
7.18  
7.17  
7.00  
6.99  
6.99  
6.98  
6.94  
6.92  
6.26  
6.25  
5.73

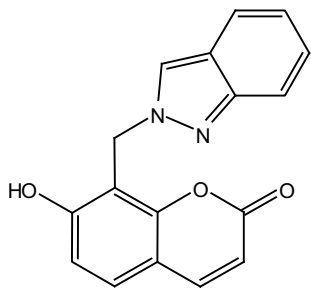

$^1\text{H}$  NMR spectrum of compound **14a** in  $\text{DMSO-}d_6$

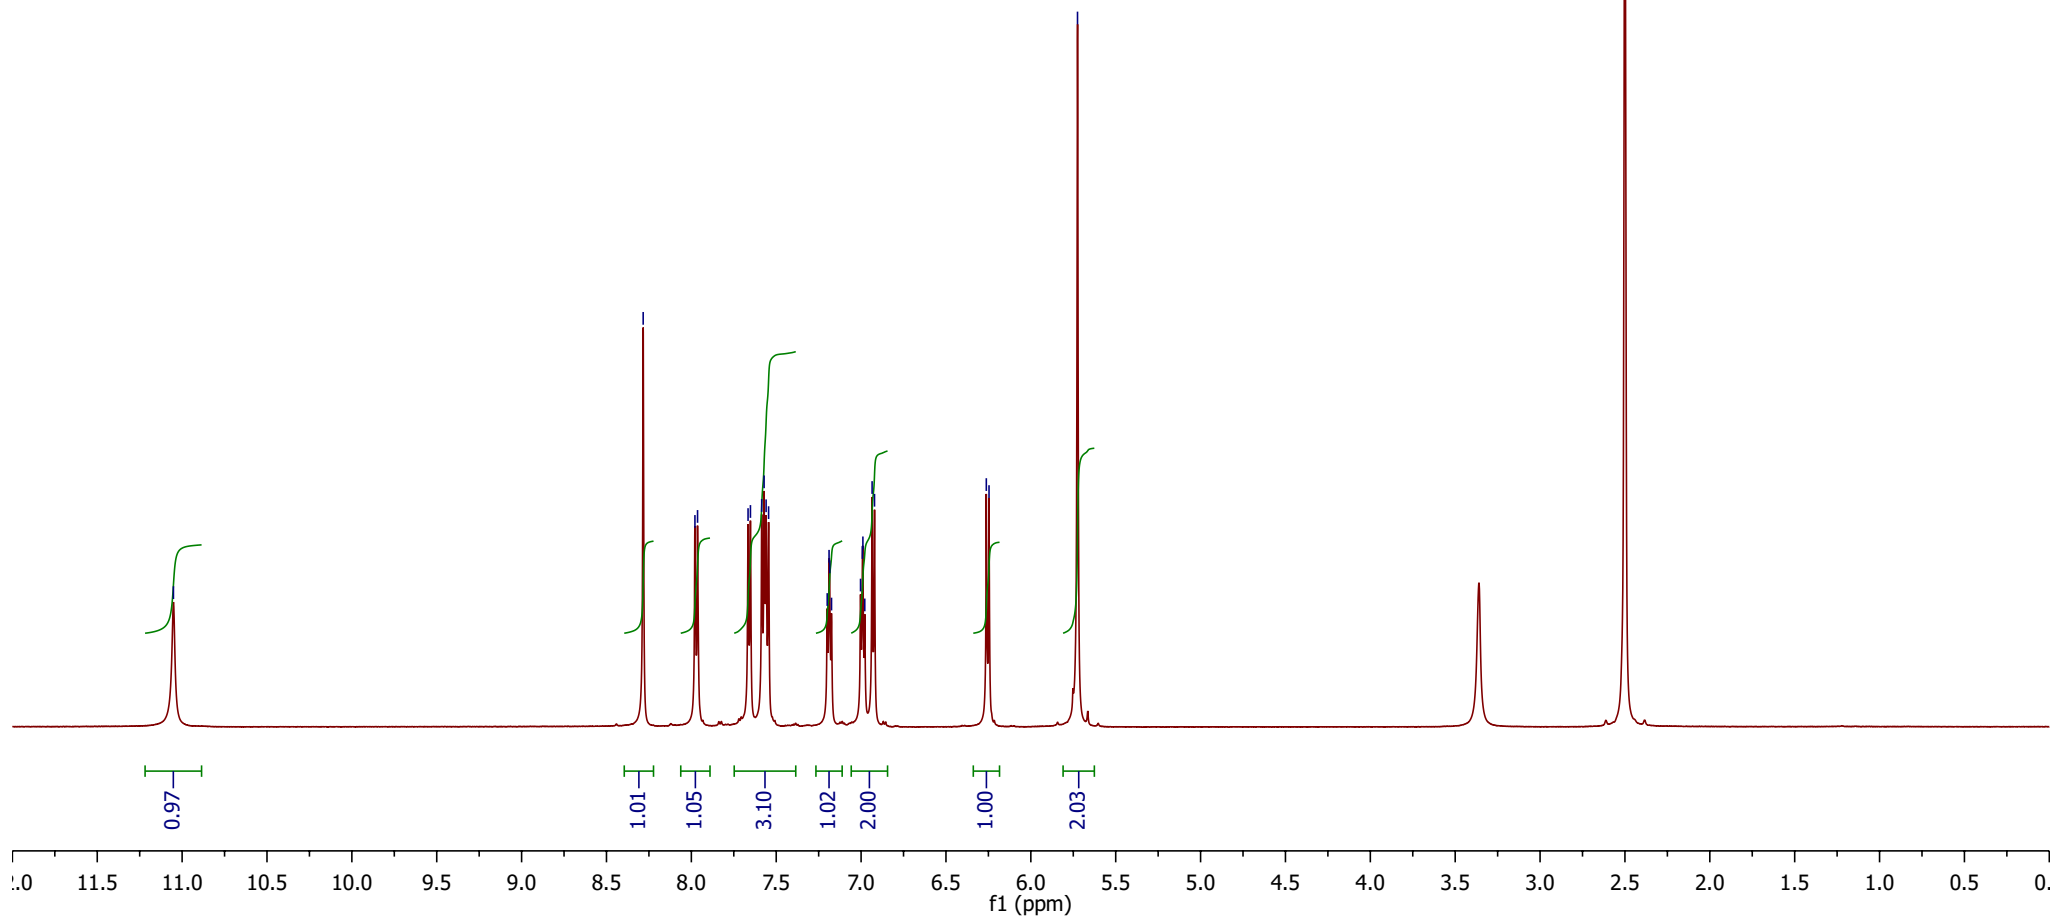

S130

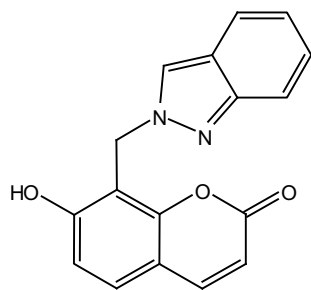

<sup>13</sup>C NMR spectrum of compound 14a in DMSO-d<sub>6</sub>

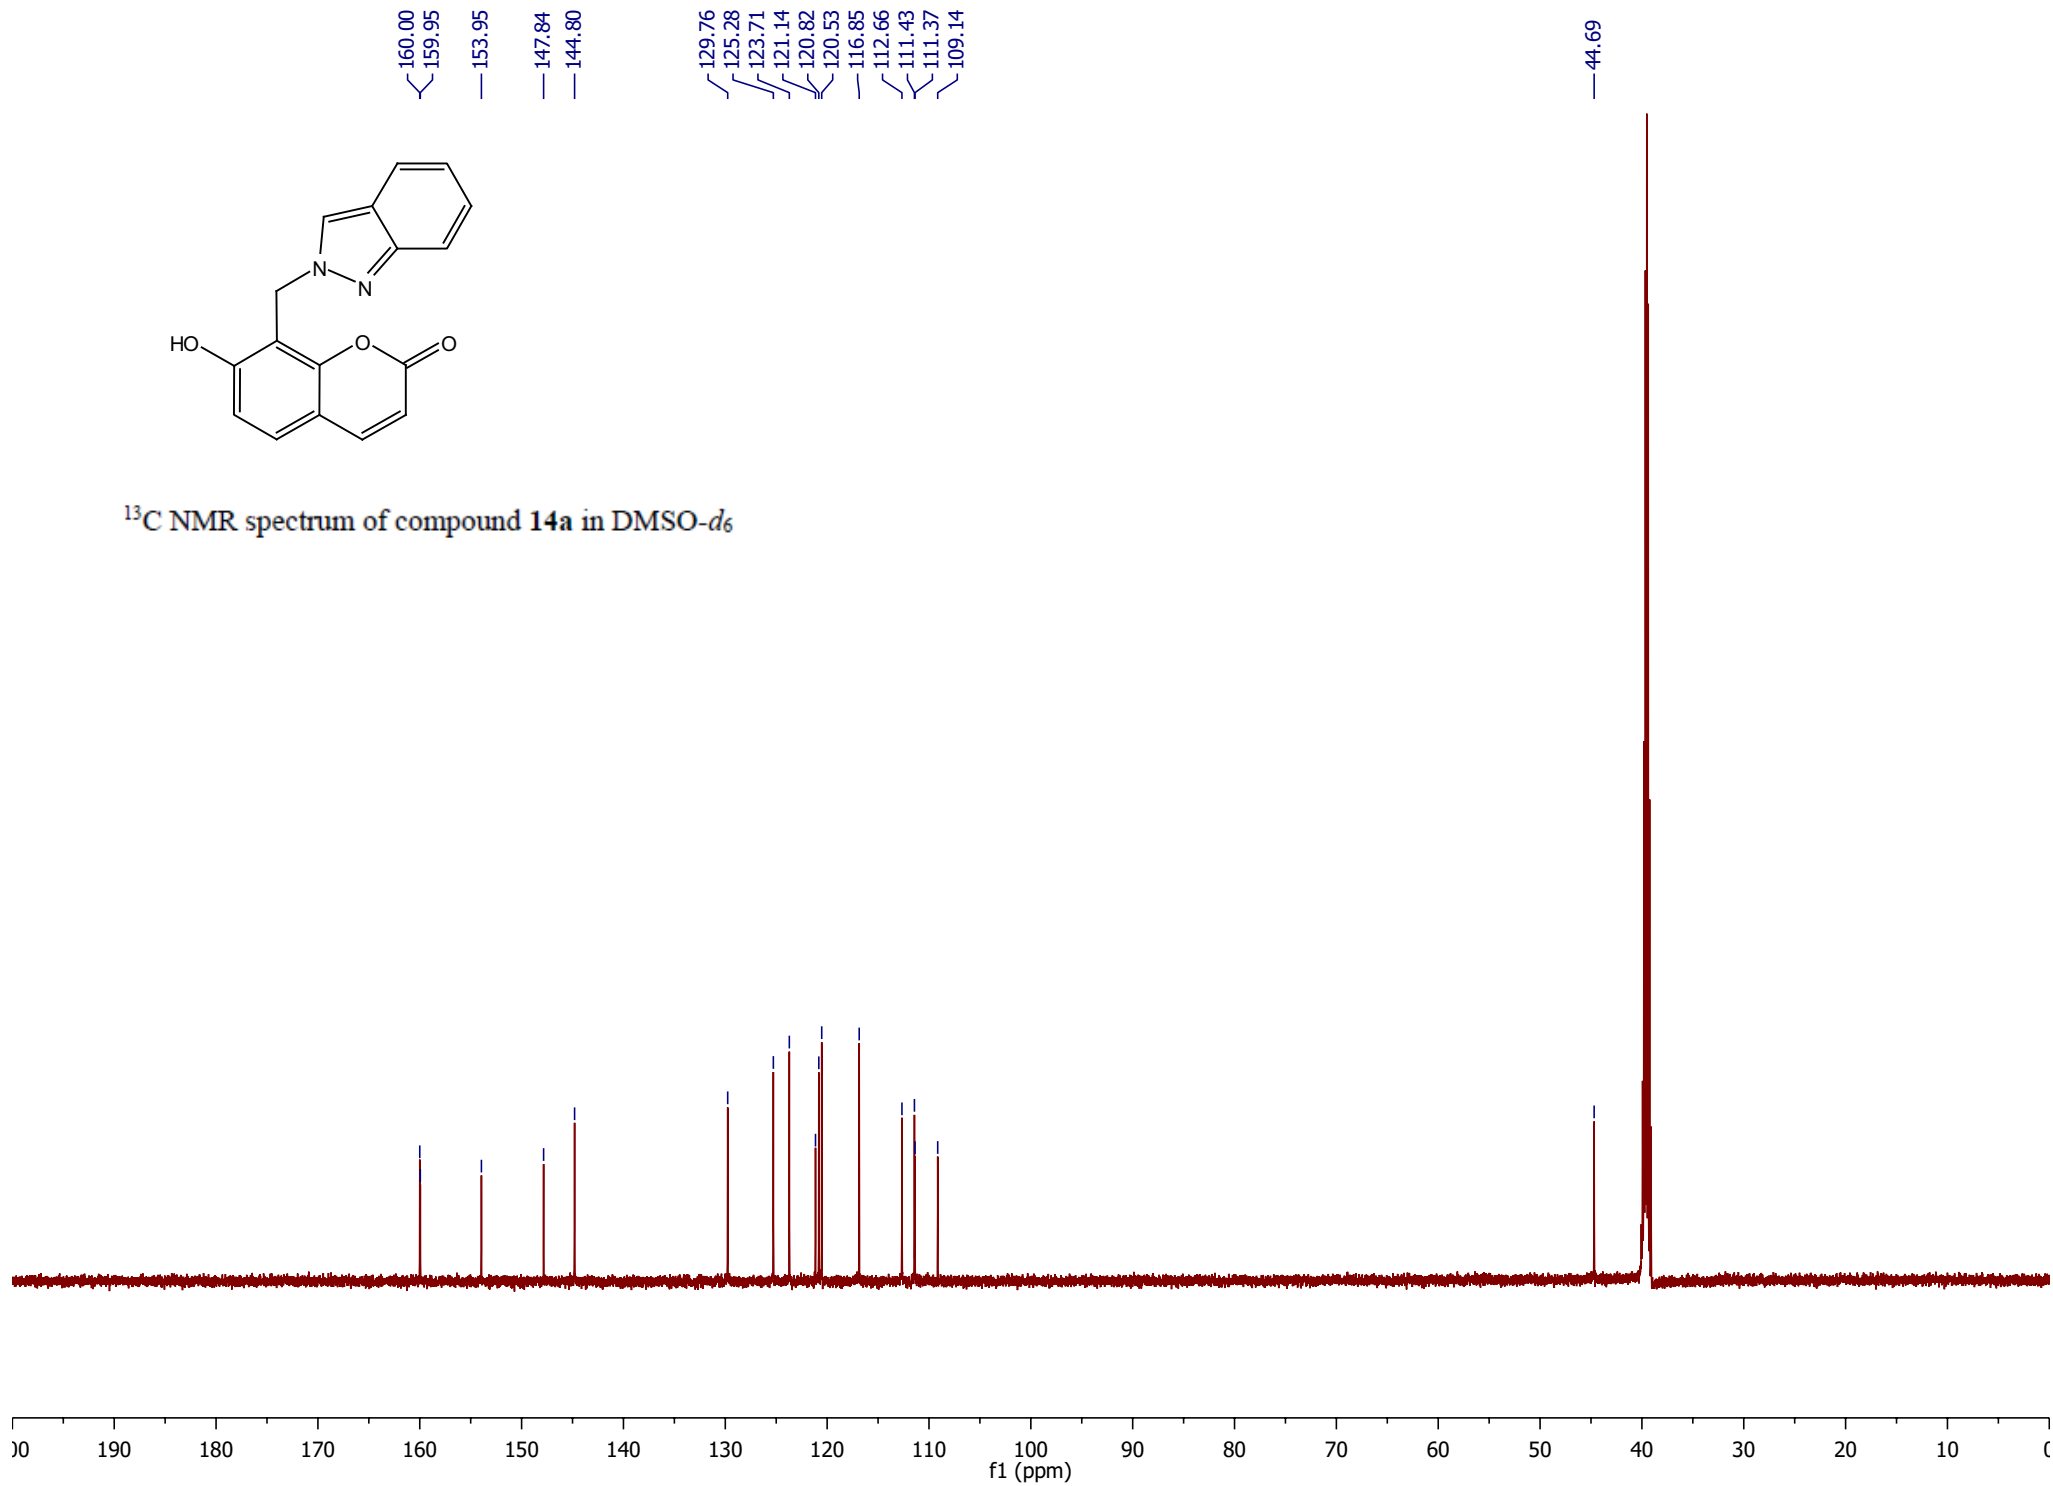

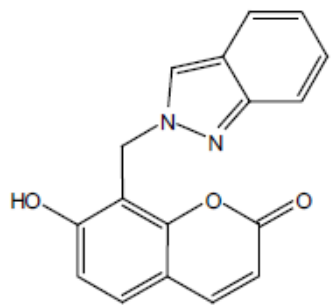

$^1\text{H}$ - $^{13}\text{C}$  HSQC spectrum of  
compound **14a** in  $\text{DMSO-}d_6$

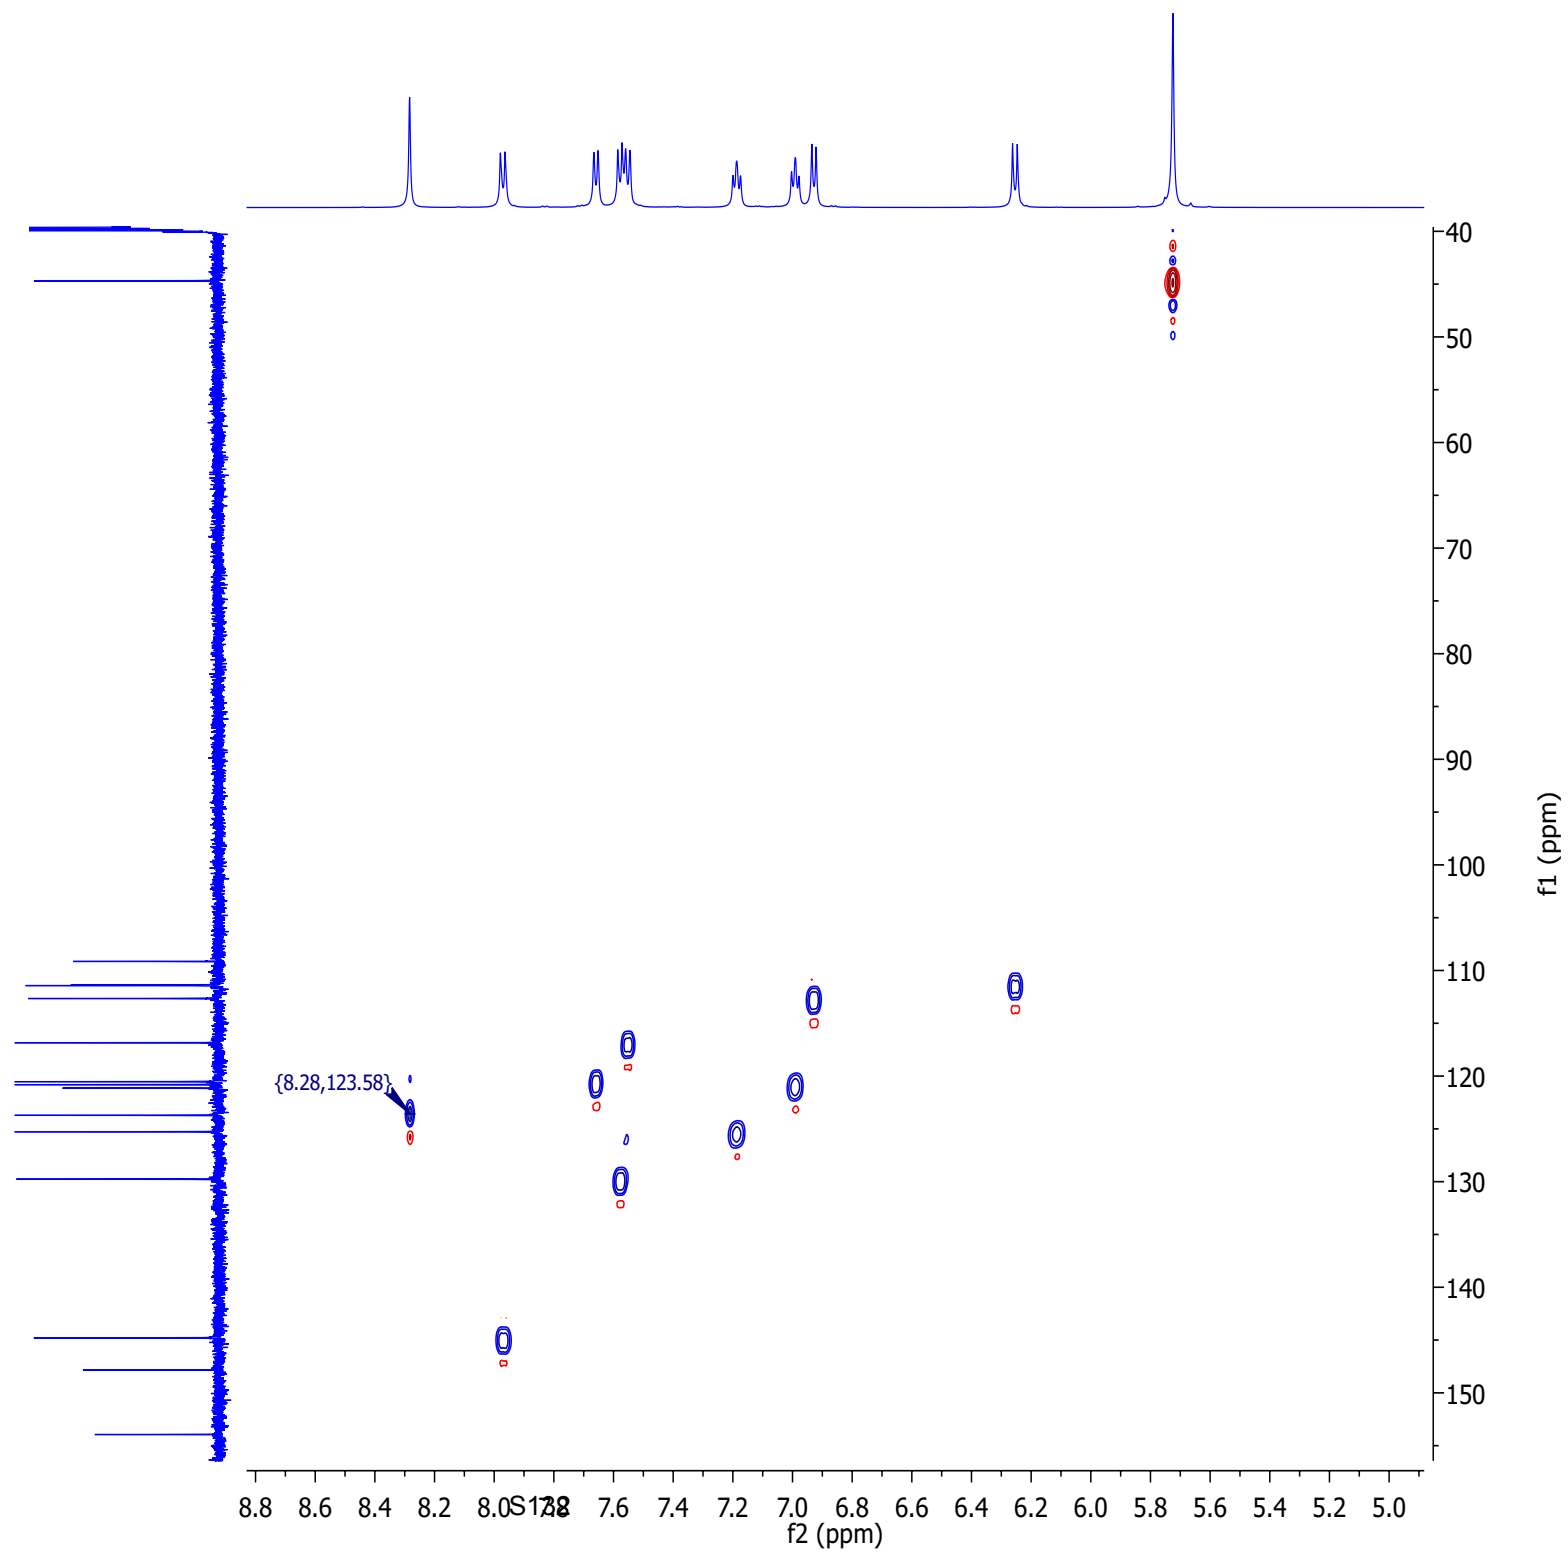

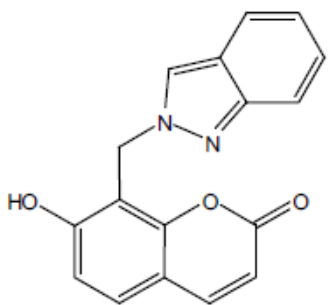

$^1\text{H}$ - $^{13}\text{C}$  HMBC spectrum of  
compound **14a** in  $\text{DMSO-}d_6$

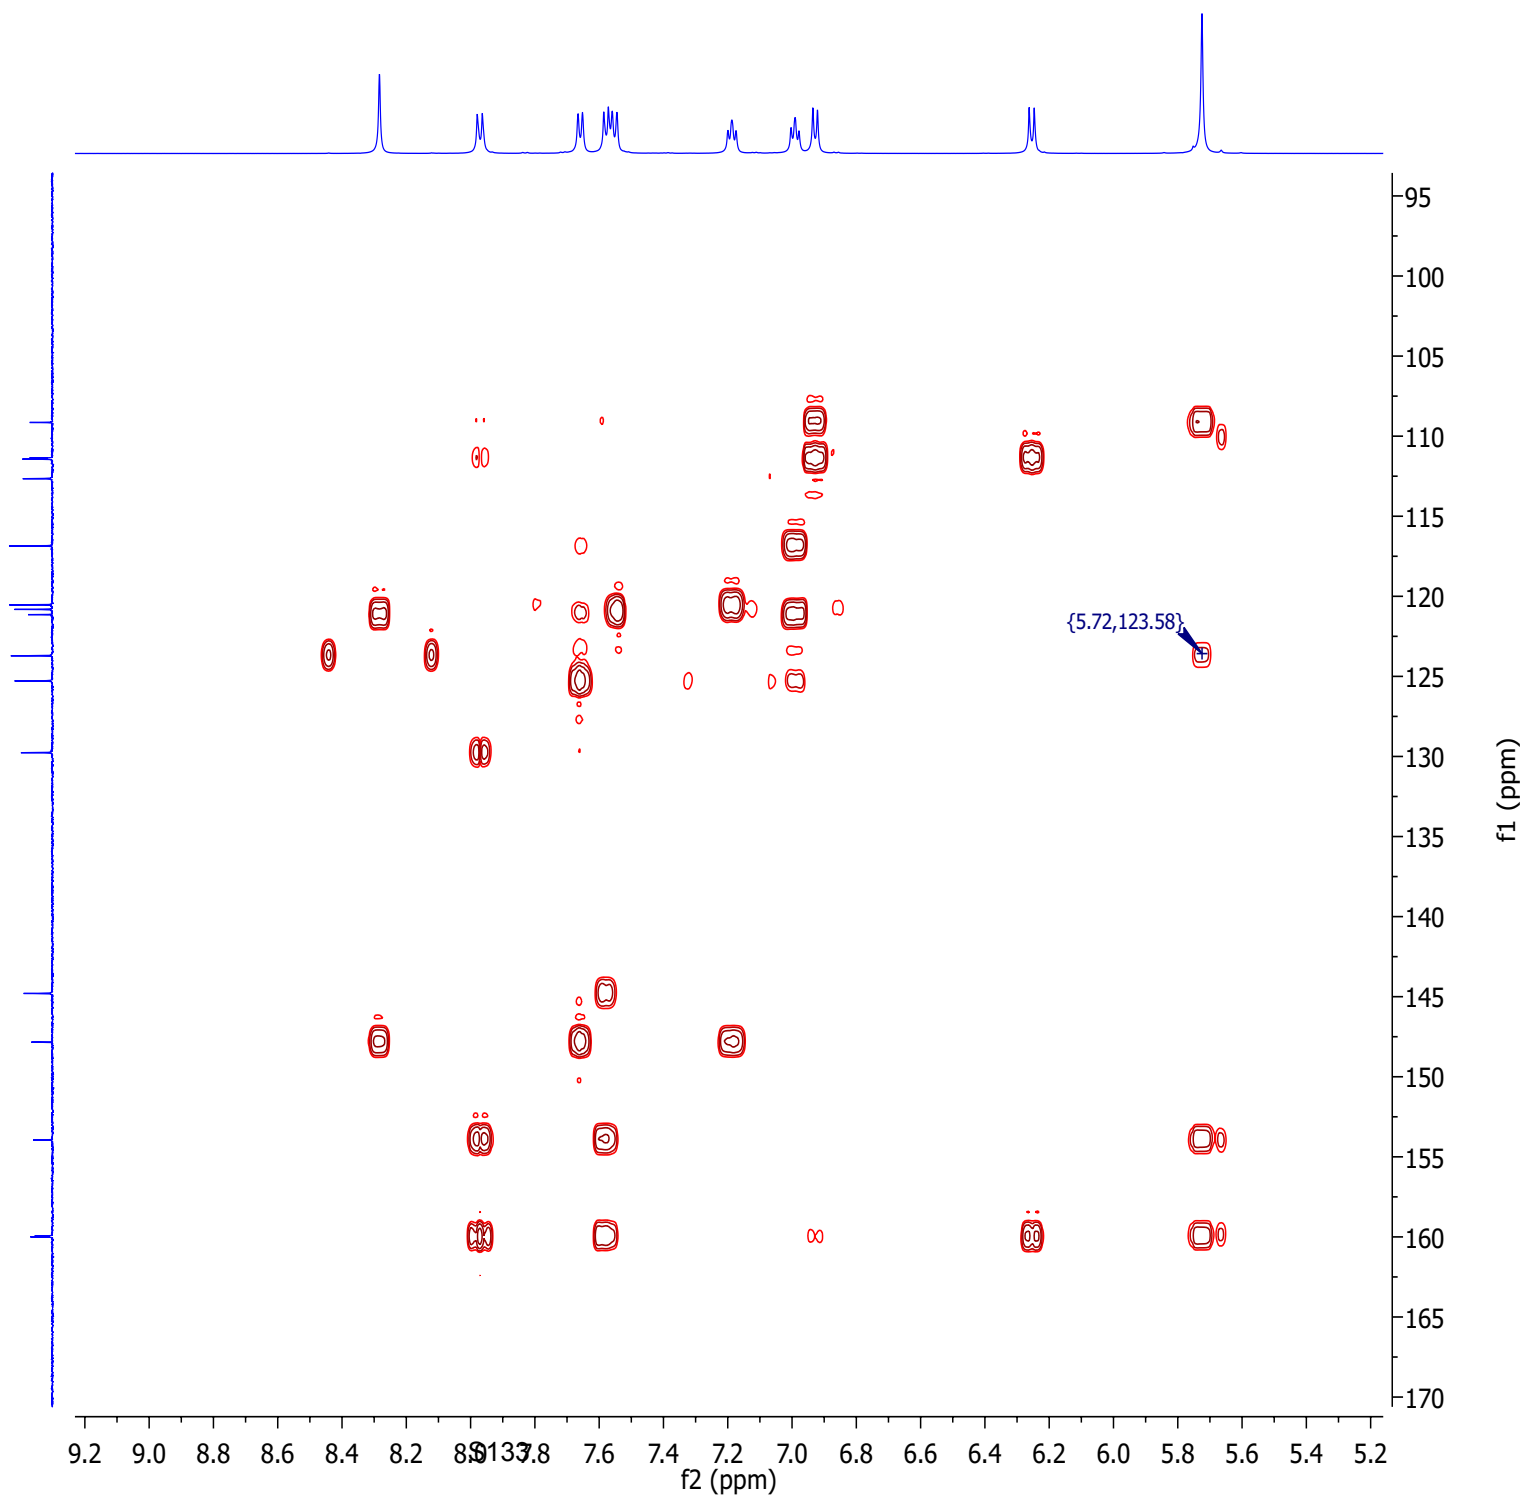

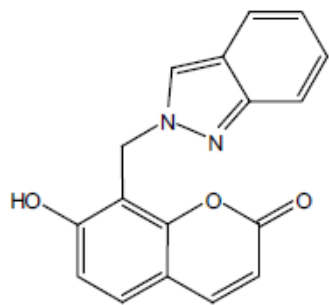

1D NOESY spectrum of compound 14a in DMSO-*d*<sub>6</sub>

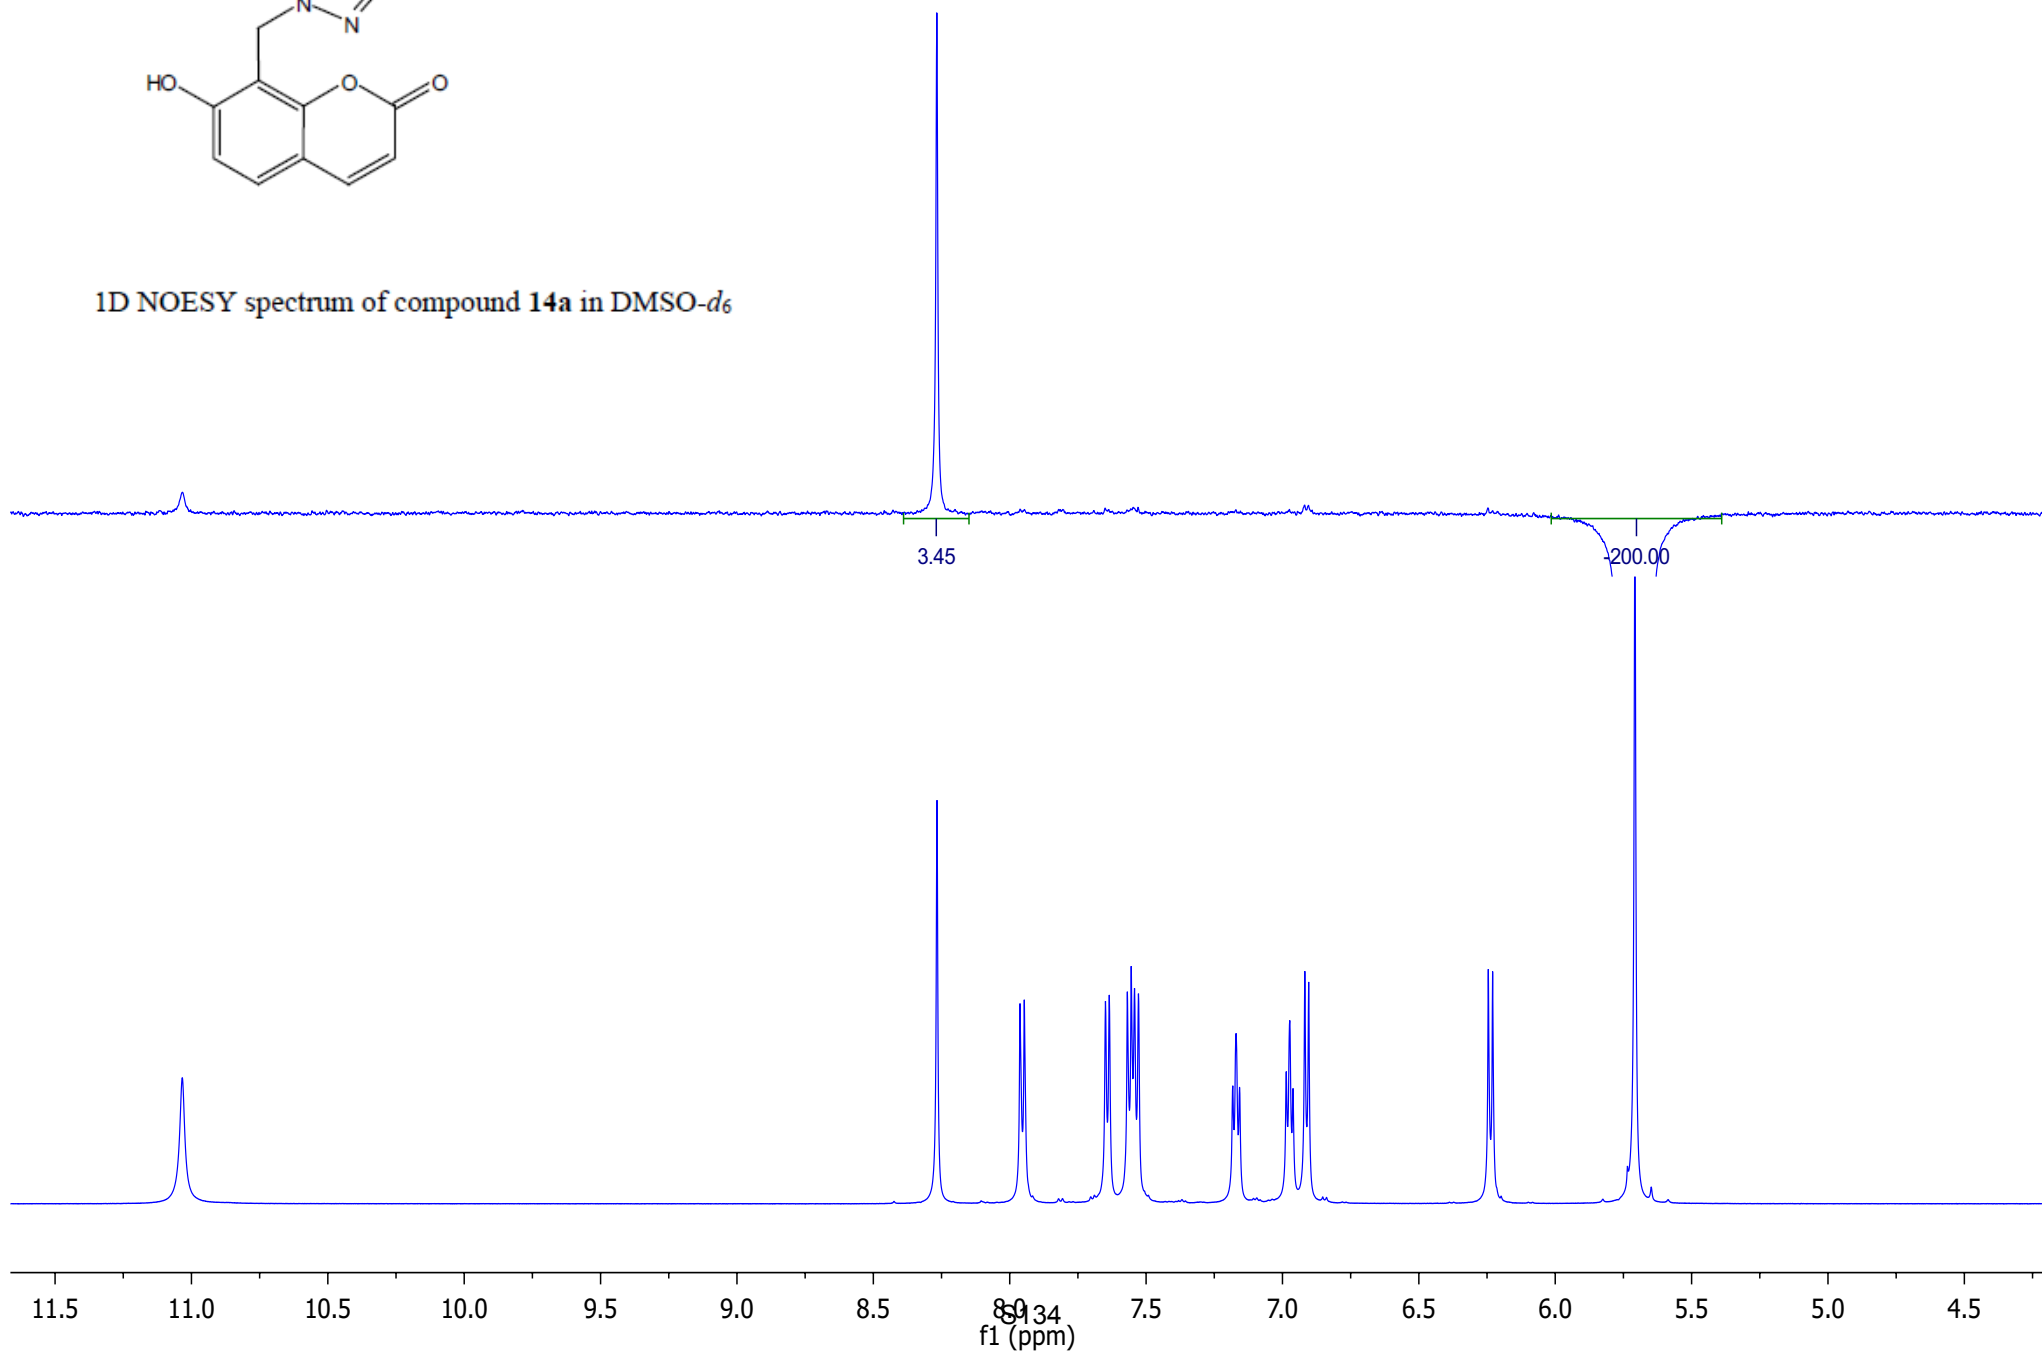

11.32

8.44  
8.32  
8.05  
8.03  
7.67  
7.65  
7.57  
7.55  
7.52  
7.50  
7.21  
7.19  
7.17  
7.11  
7.08  
7.02  
7.00  
6.97  
5.80

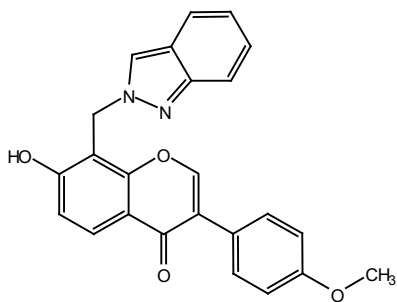

$^1\text{H}$  NMR spectrum of compound **14b** in  $\text{DMSO-}d_6$

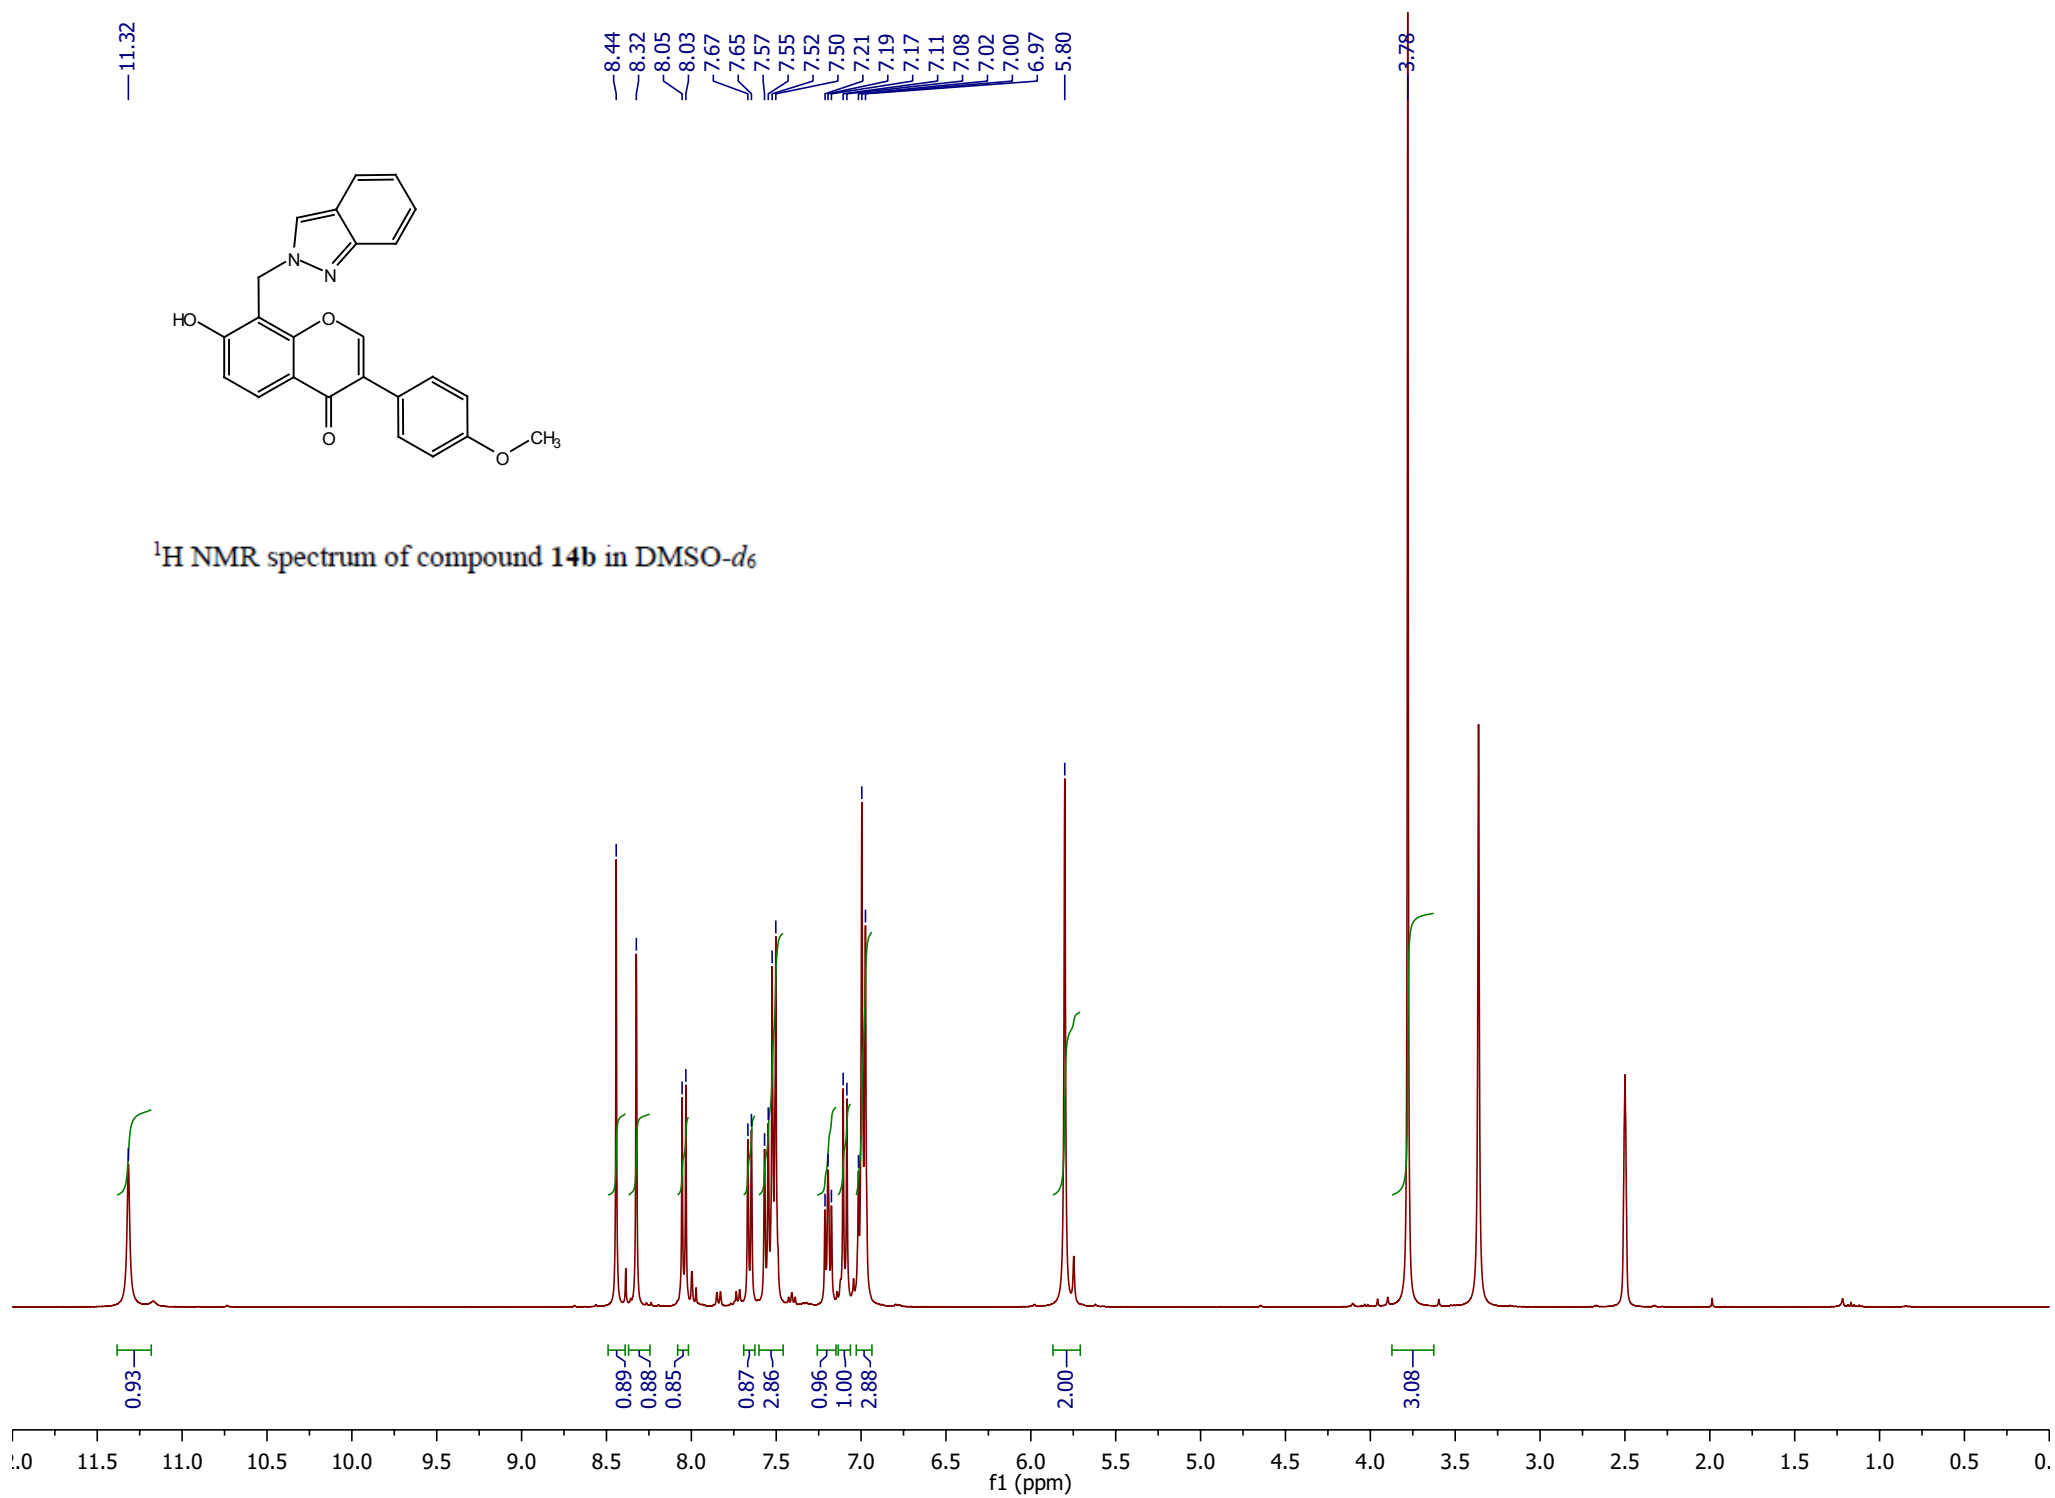

S135

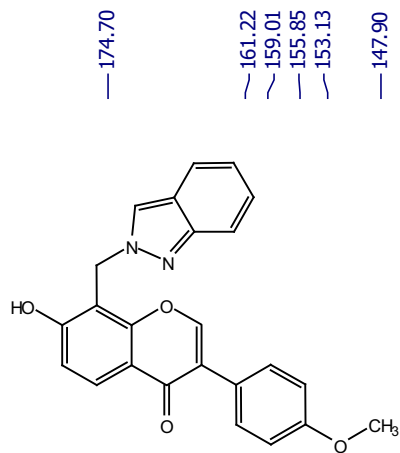

$^{13}\text{C}$  NMR spectrum of compound **14b** in  $\text{DMSO-}d_6$

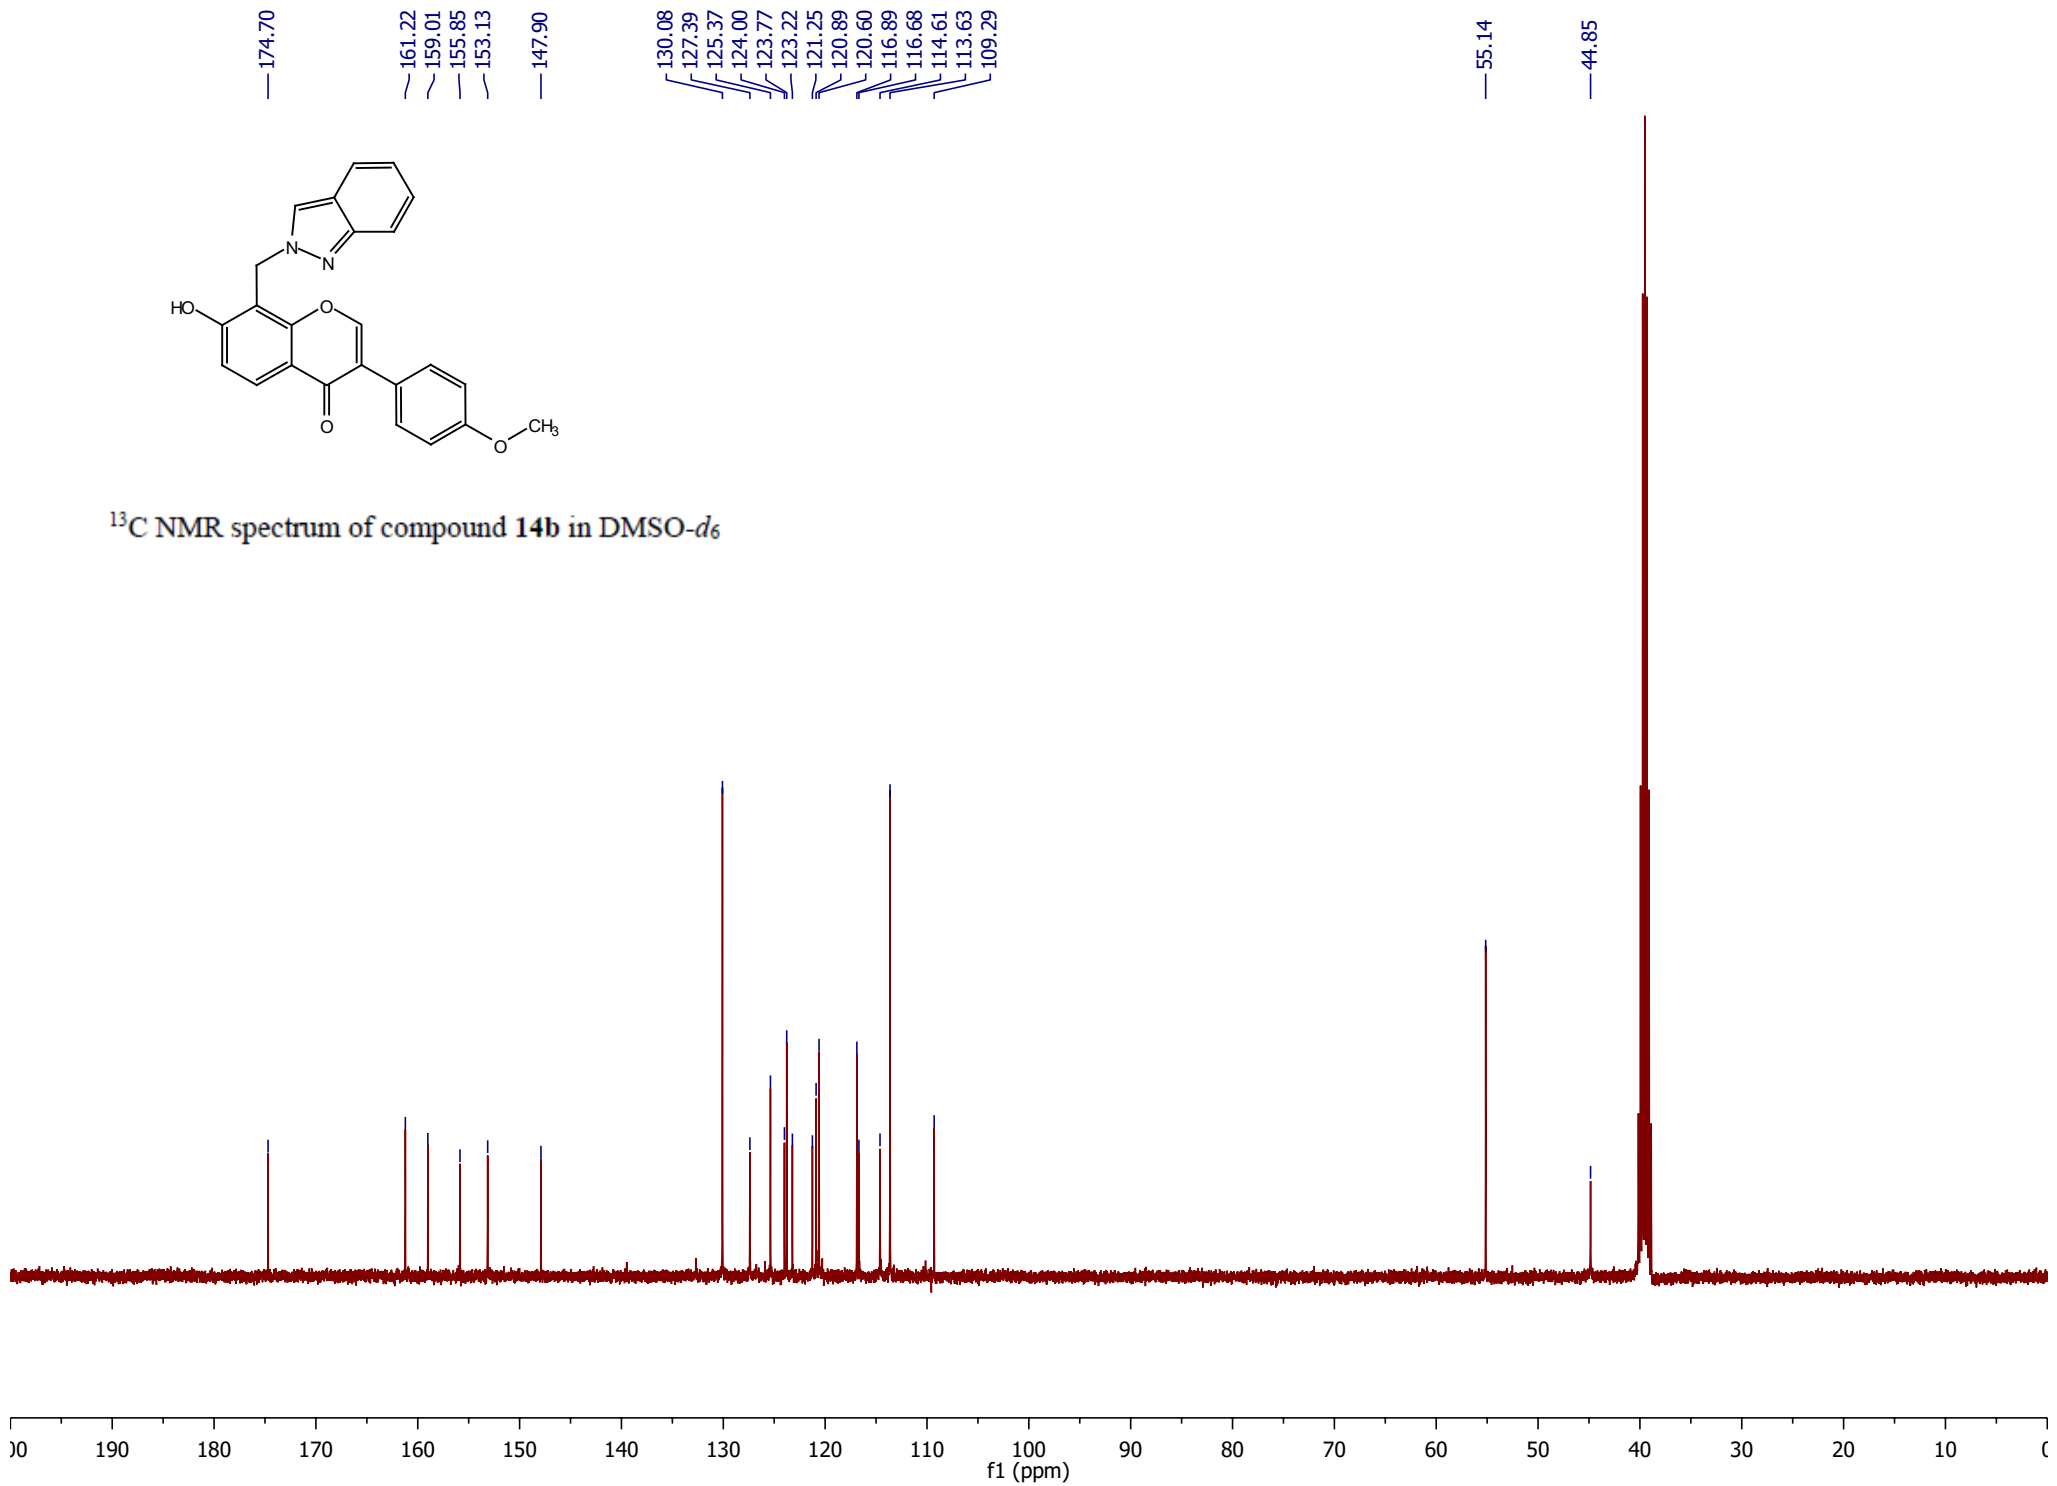



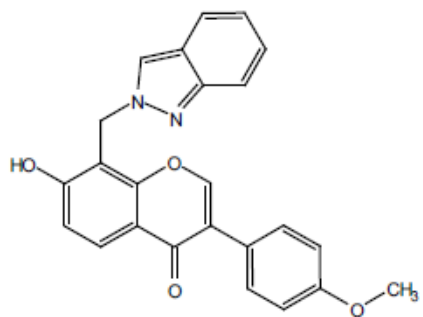

$^1\text{H}$ - $^{13}\text{C}$  HSQC spectrum of  
compound **14b** in  $\text{DMSO-}d_6$

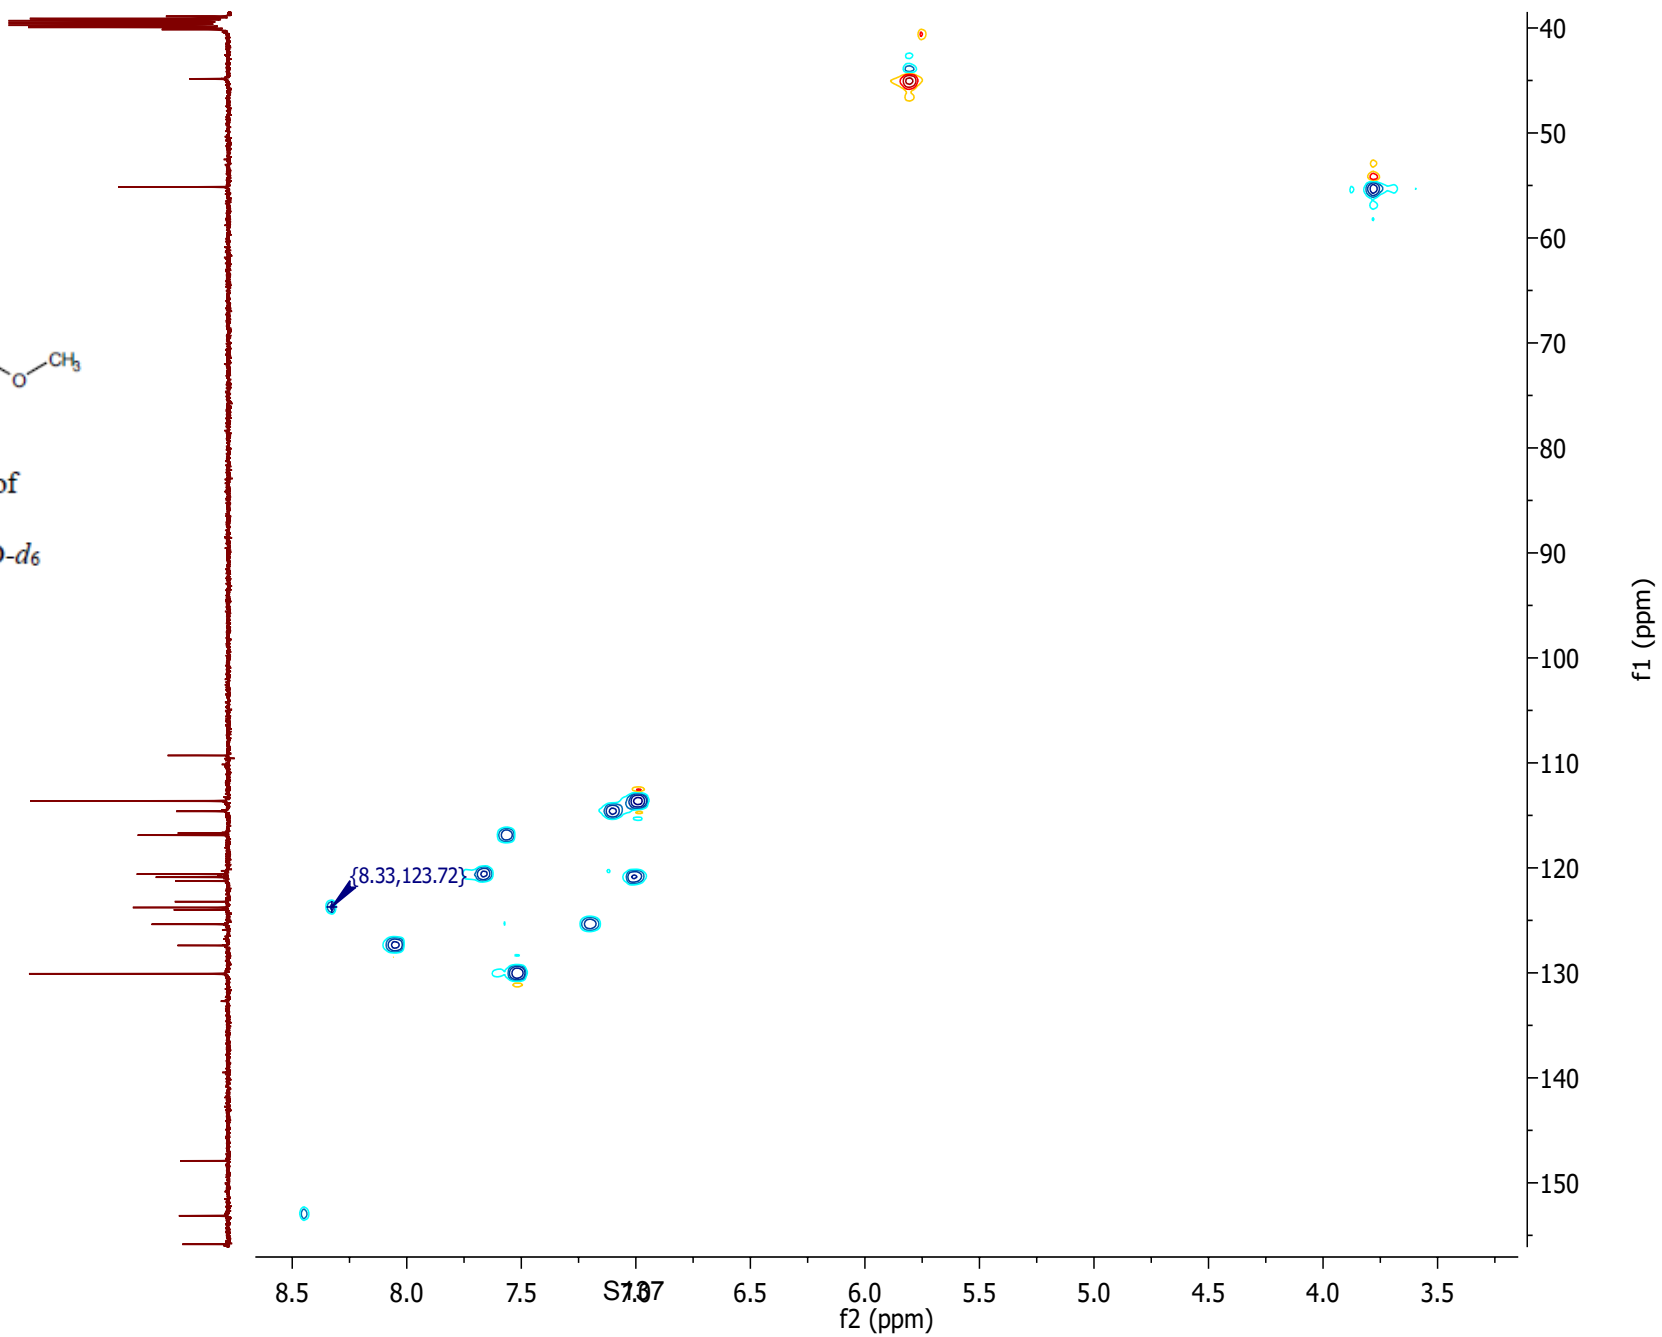

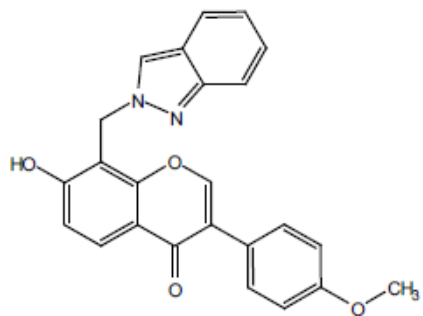

$^1\text{H}$ - $^{13}\text{C}$  HMBC spectrum of  
compound **14b** in  $\text{DMSO-}d_6$

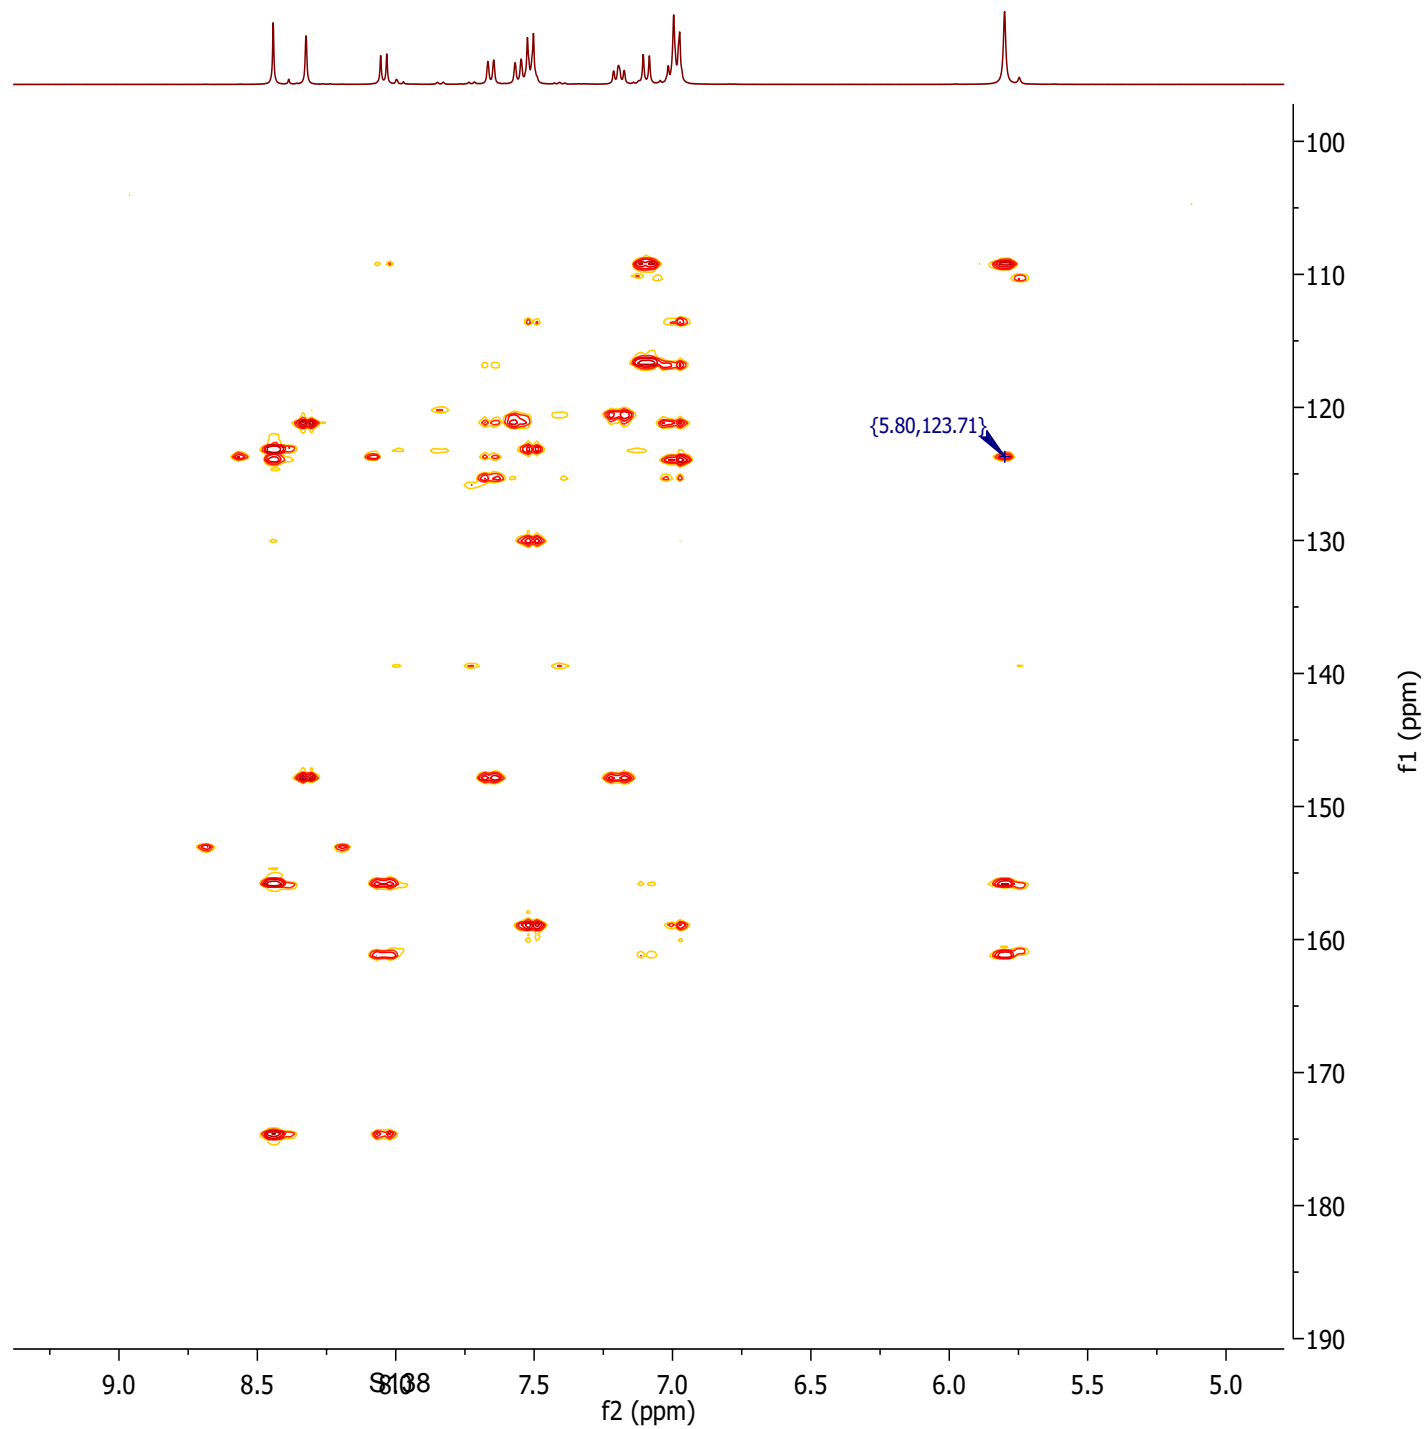

MaxPeak: 100.00%  
Ret\_Time: 0.656 min

# IBOX17064

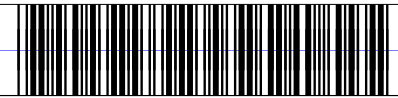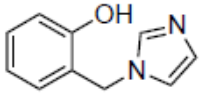

4a

Mol Wt 0

Exact Mass

| # | Time  | Area%  |
|---|-------|--------|
| 1 | 0.656 | 100.00 |

DAD1 A, Sig=215,16 Ref=off (D:\DATE\08.04\L041605D\046-D4F-E1-IBOX17064.D)

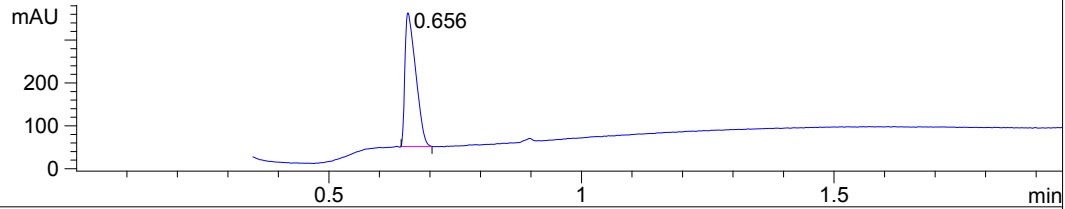

DAD1 B, Sig=254,16 Ref=off (D:\DATE\08.04\L041605D\046-D4F-E1-IBOX17064.D)

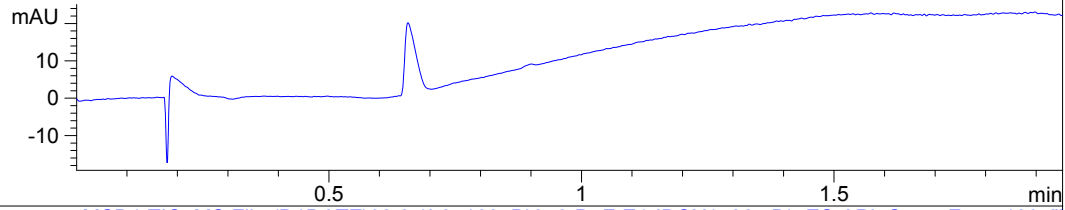

MSD1 TIC, MS File (D:\DATE\08.04\L041605D\046-D4F-E1-IBOX17064.D) ES-API, Scan, Frag: 100, "POS"

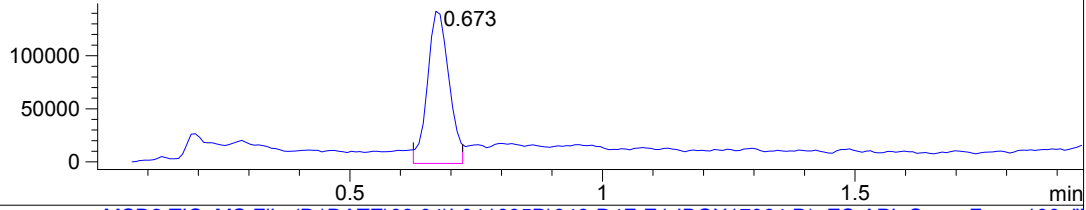

MSD2 TIC, MS File (D:\DATE\08.04\L041605D\046-D4F-E1-IBOX17064.D) ES-API, Scan, Frag: 100, "NEG"

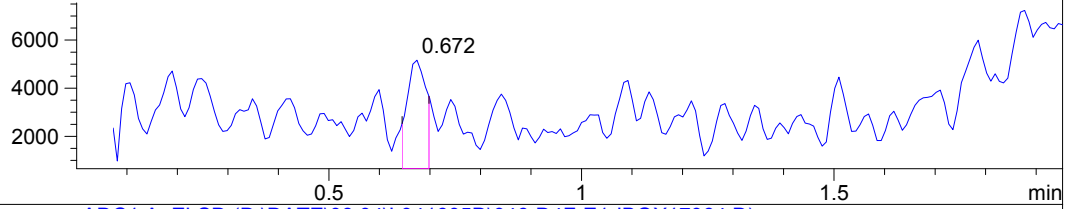

ADC1 A, ELSD (D:\DATE\08.04\L041605D\046-D4F-E1-IBOX17064.D)

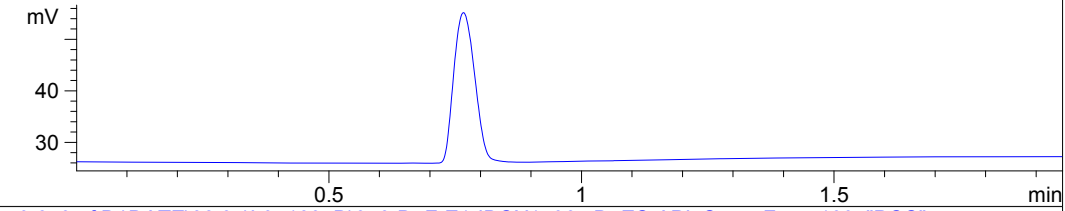

\*MSD1 SPC, time=0.670 of D:\DATE\08.04\L041605D\046-D4F-E1-IBOX17064.D ES-API, Scan, Frag: 100, "POS"

RT 0.673

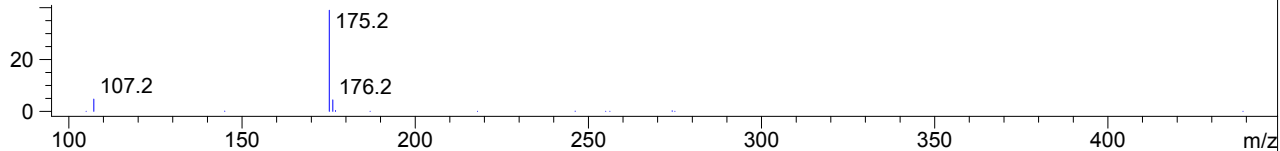

\*MSD2 SPC, time=0.674 of D:\DATE\08.04\L041605D\046-D4F-E1-IBOX17064.D ES-API, Scan, Frag: 100, "NEG"

RT 0.672

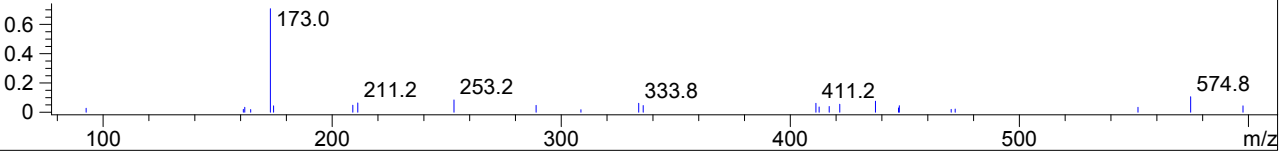

MaxPeak: 98.97%  
Ret\_Time: 0.550 min

# CLQ379824

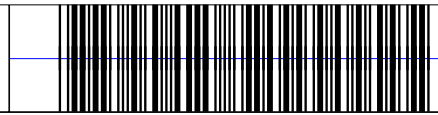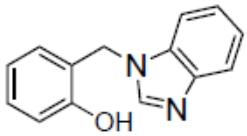

**4b**

**Mol Wt**  
**Exact Mass**

**0**

| # | Time  | Area% |
|---|-------|-------|
| 1 | 0.550 | 98.97 |
| 2 | 0.717 | 1.03  |

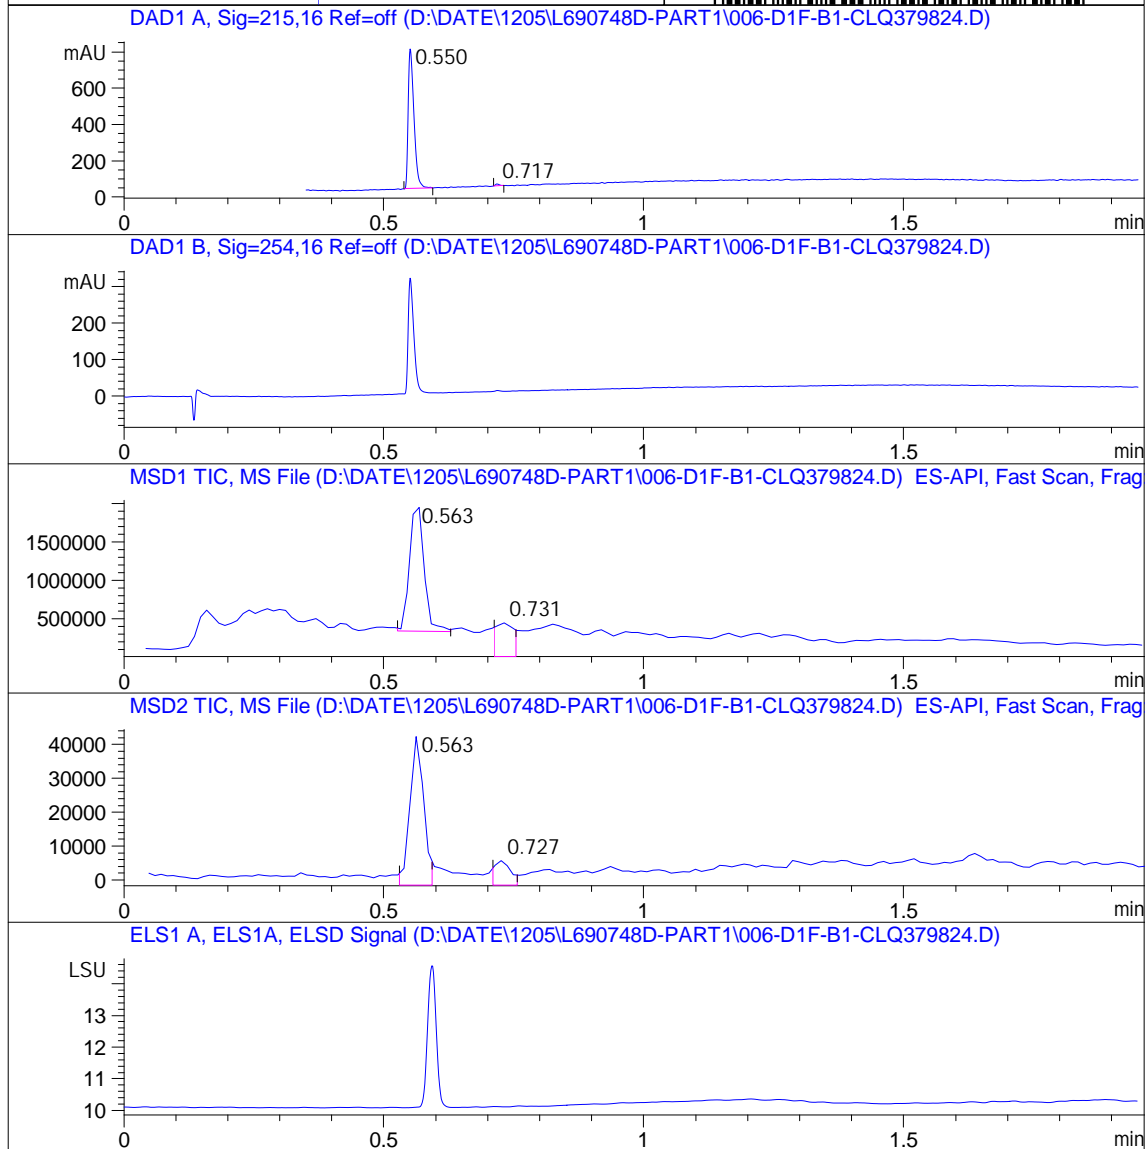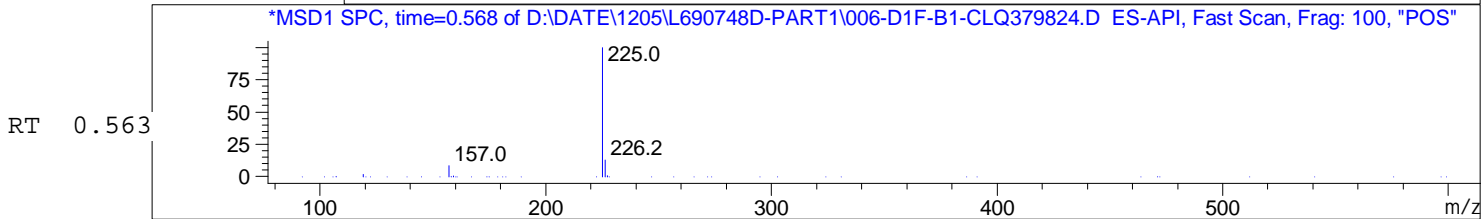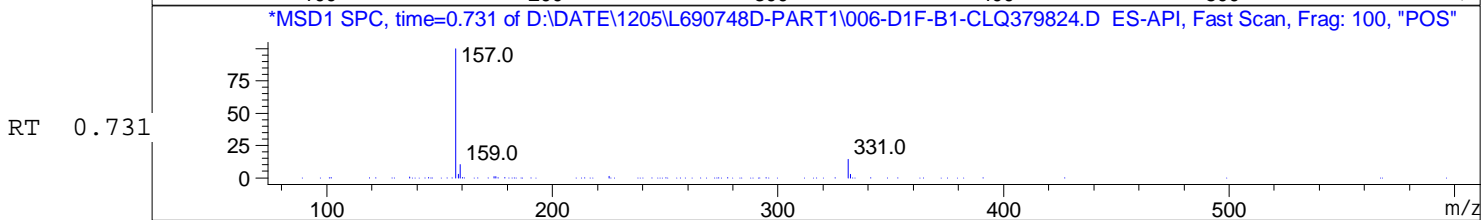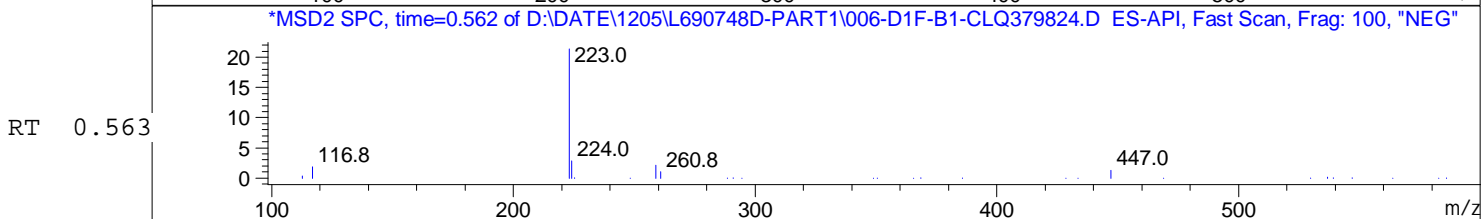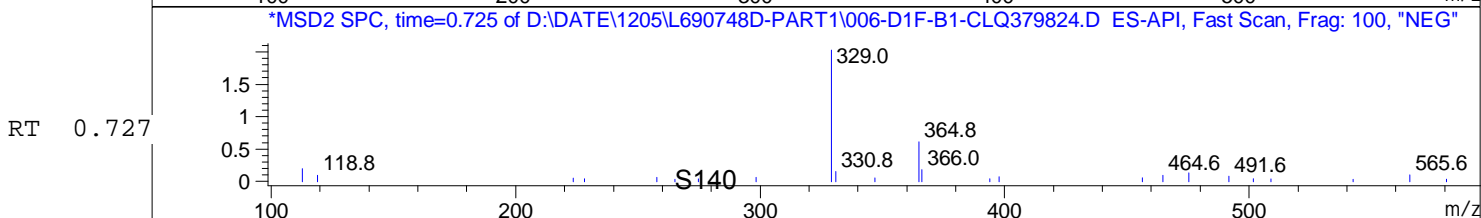

MaxPeak: 100.00%  
Ret\_Time: 0.777 min

# CLQ379825

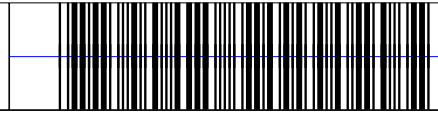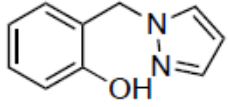

**4c**

**Mol Wt**  
**Exact Mass**

**0**

| # | Time  | Area%  |
|---|-------|--------|
| 1 | 0.777 | 100.00 |

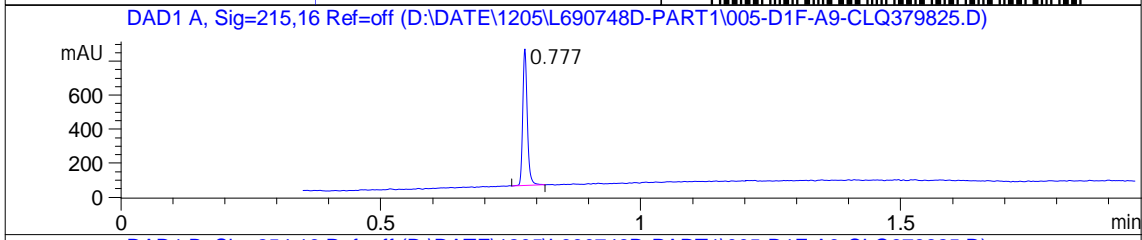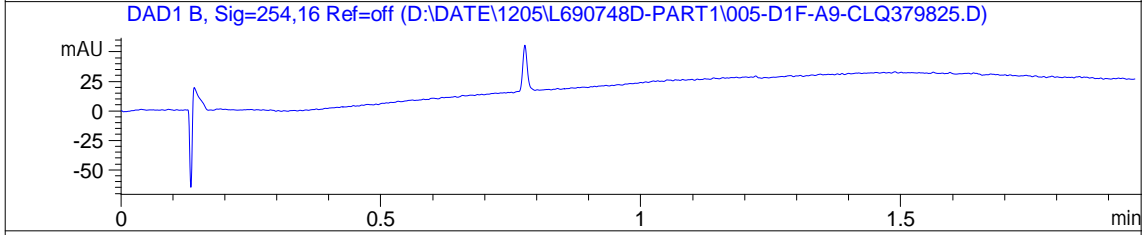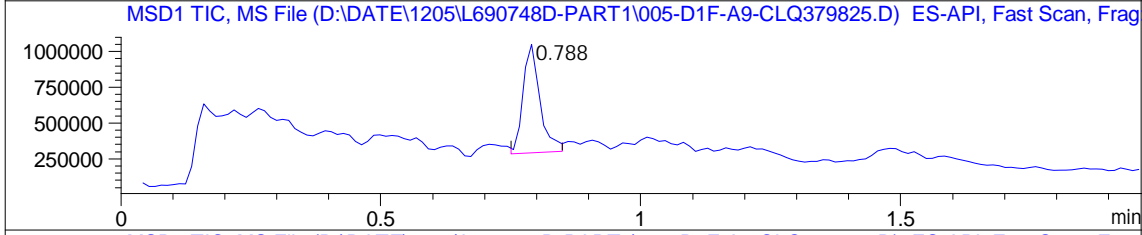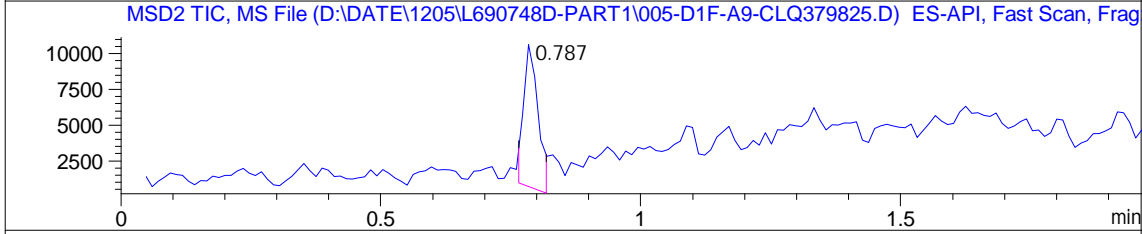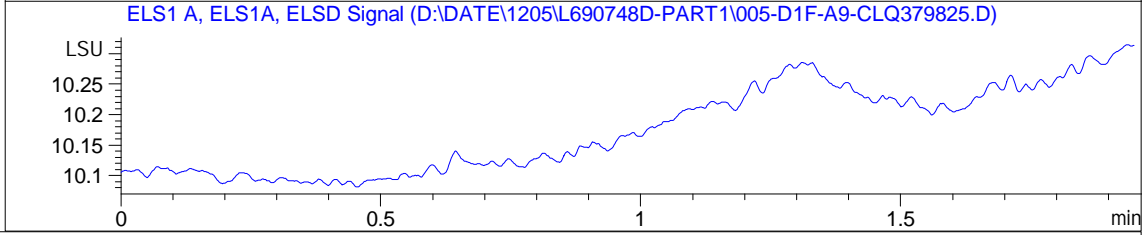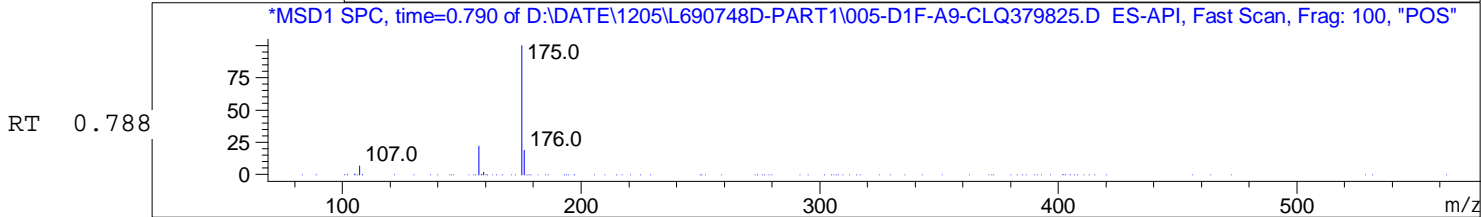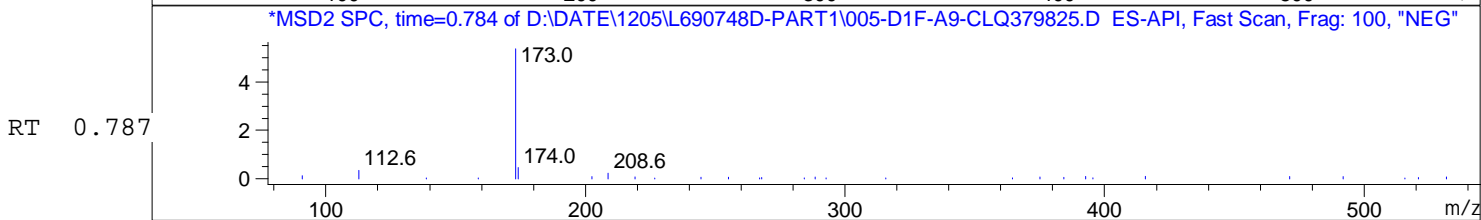

# CLQ377579

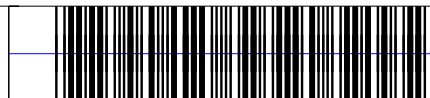

MaxPeak: 95.28%  
Ret\_Time: 0.878 min

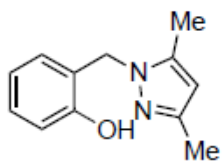

**Mol Wt**  
**Exact Mass**

| # | Time  | Area% |
|---|-------|-------|
| 1 | 0.878 | 95.28 |
| 2 | 1.030 | 3.66  |
| 3 | 1.108 | 1.06  |

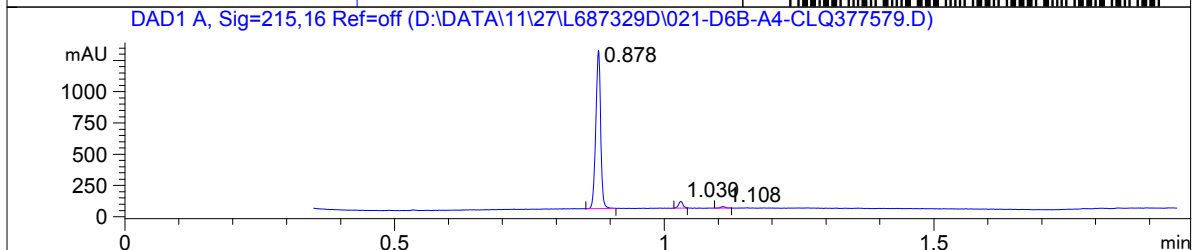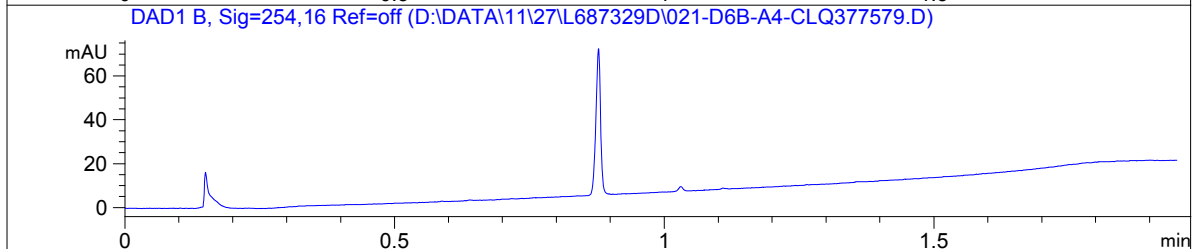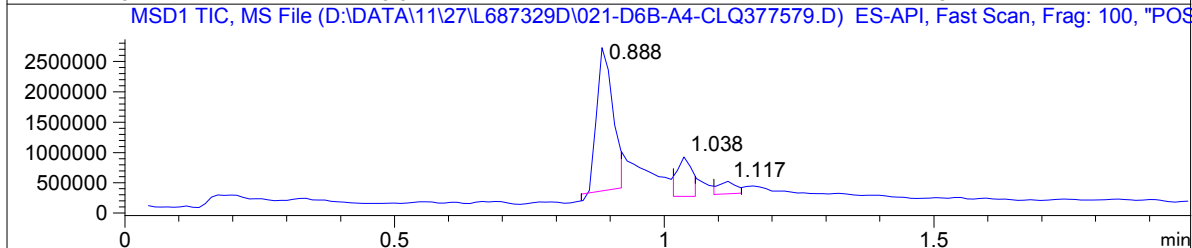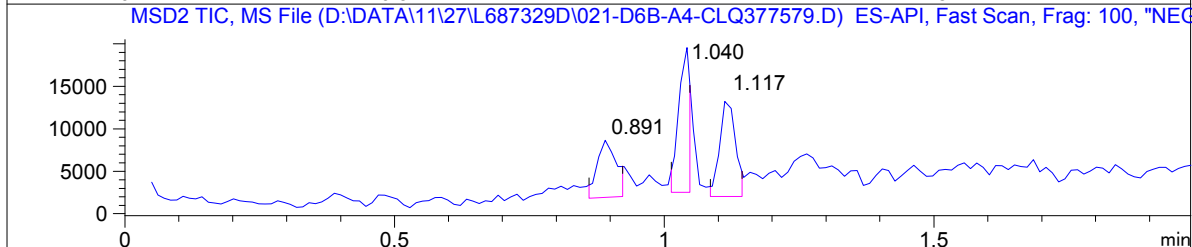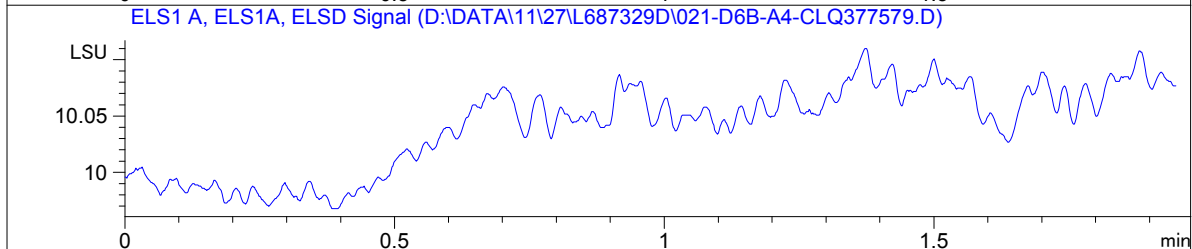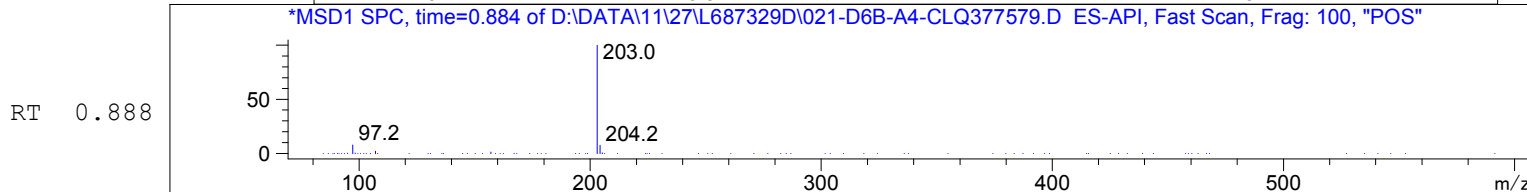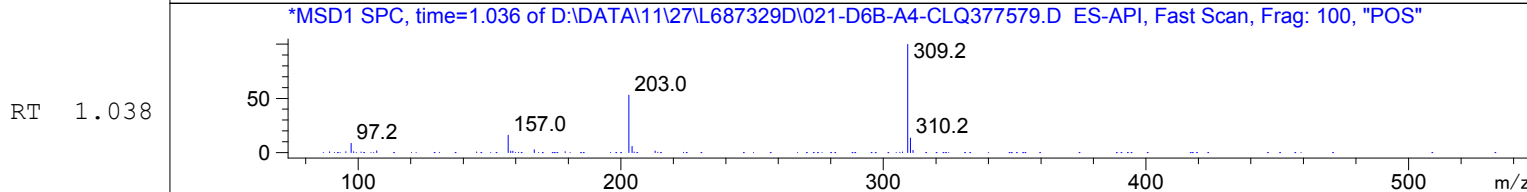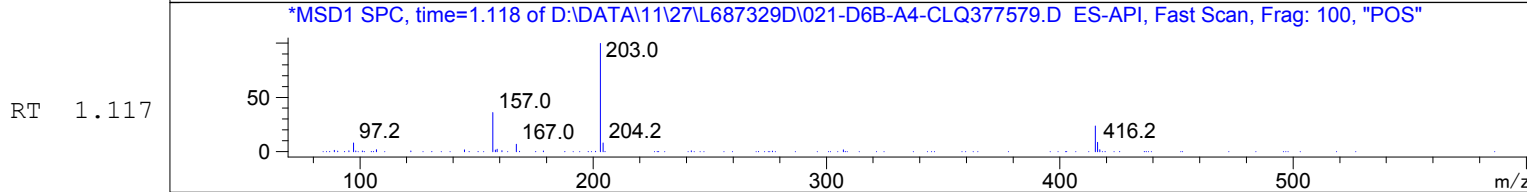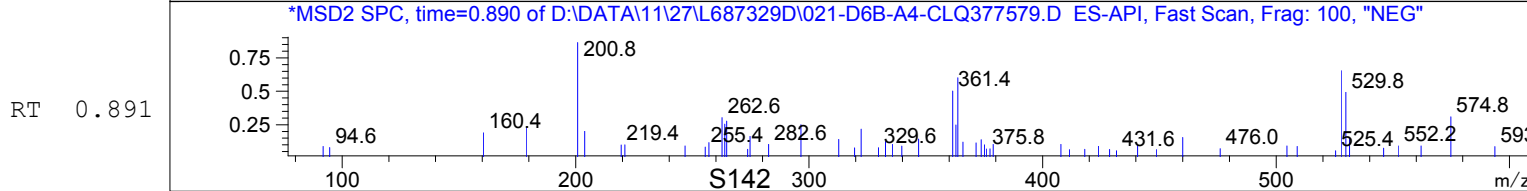

Error: Peaks not found!

# CLQ379834

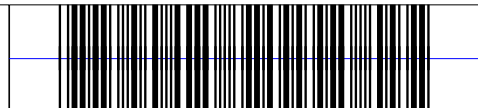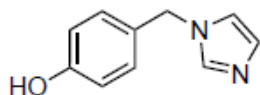

**5a**

**Mol Wt**  
**Exact Mass**

**0**

Error: Peaks not found!

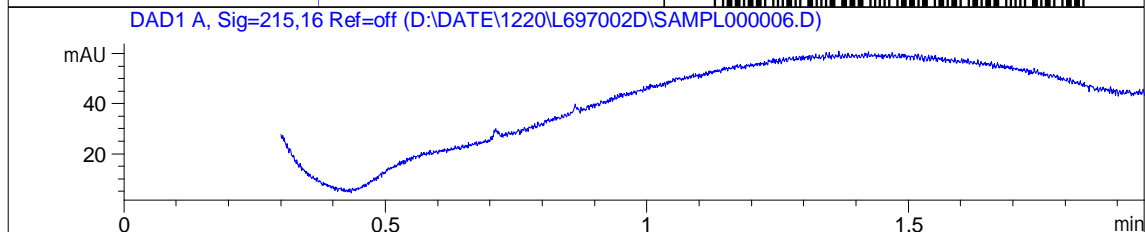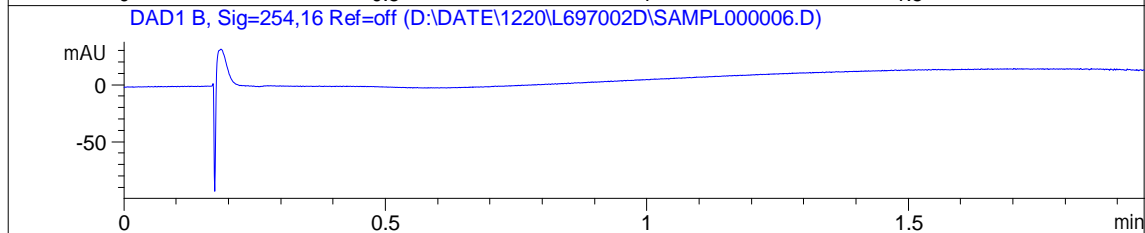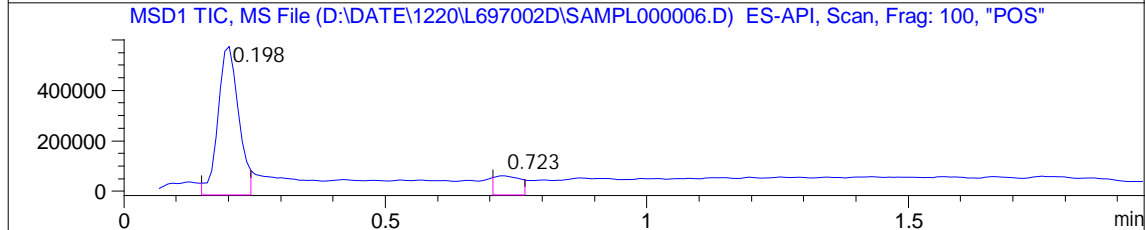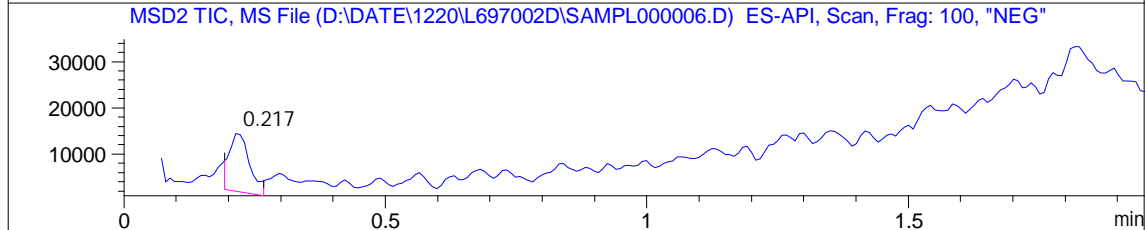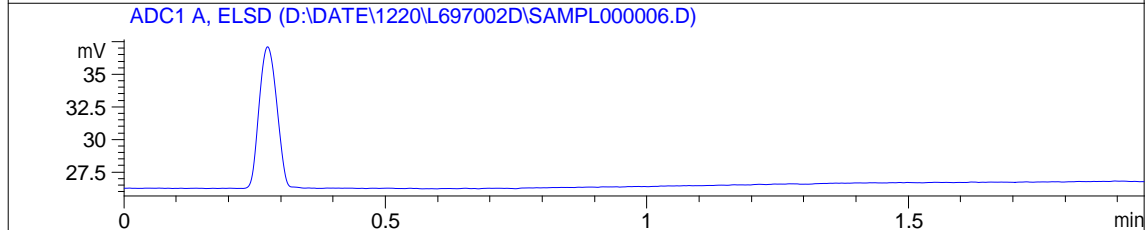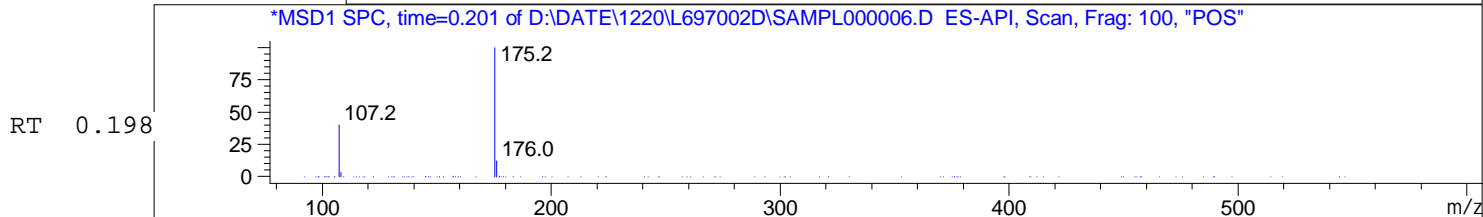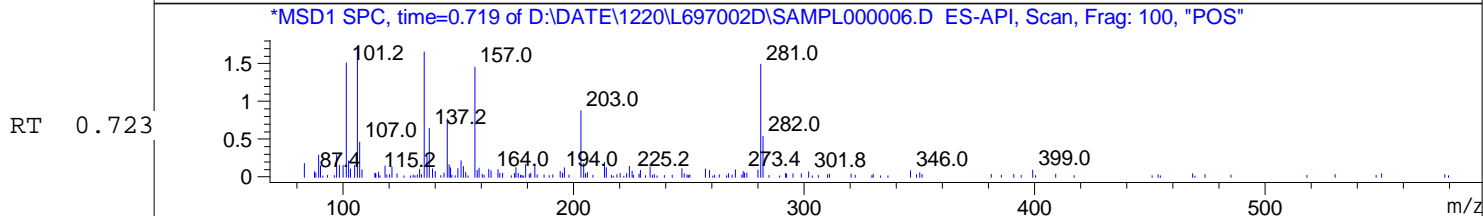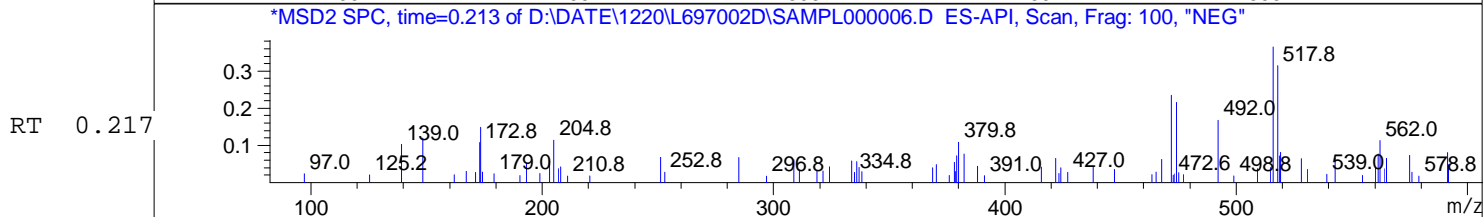

MaxPeak: 100.00%  
Ret\_Time: 0.684 min

CLQ379836

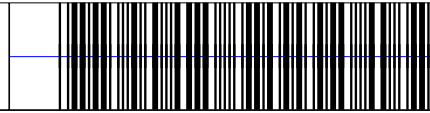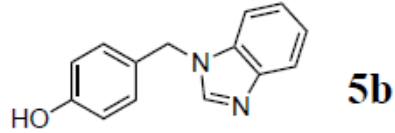

**Mol Wt**  
**Exact Mass**

| # | Time  | Area%  |
|---|-------|--------|
| 1 | 0.684 | 100.00 |

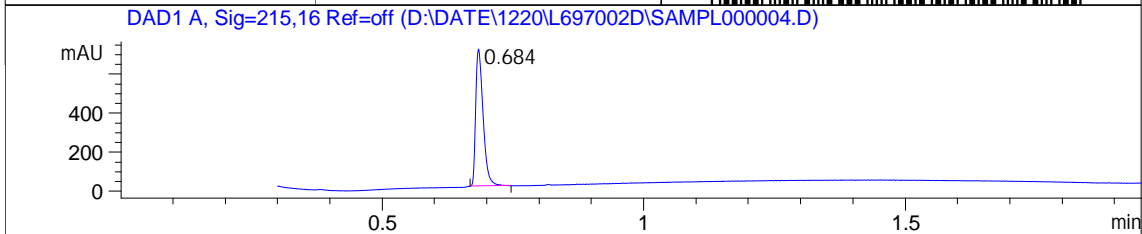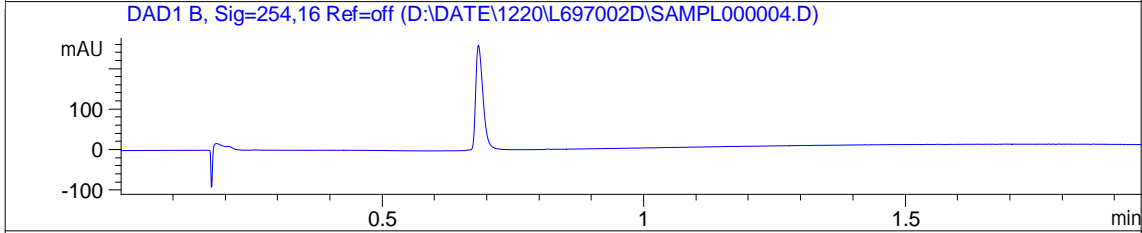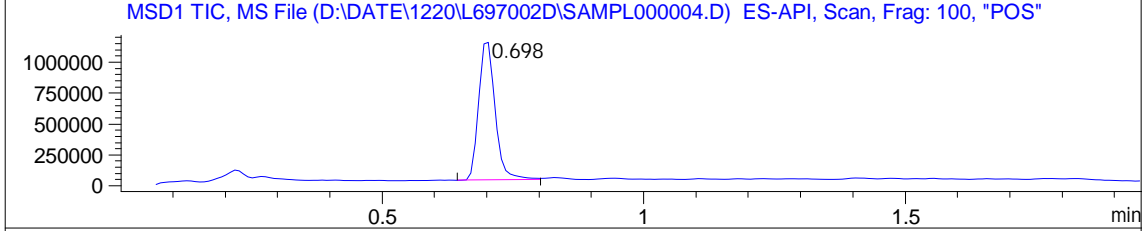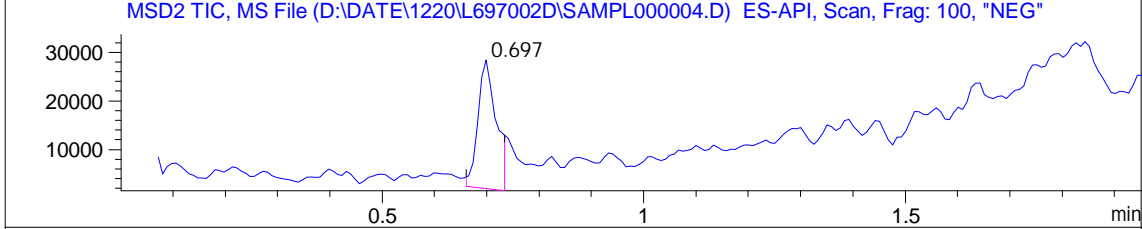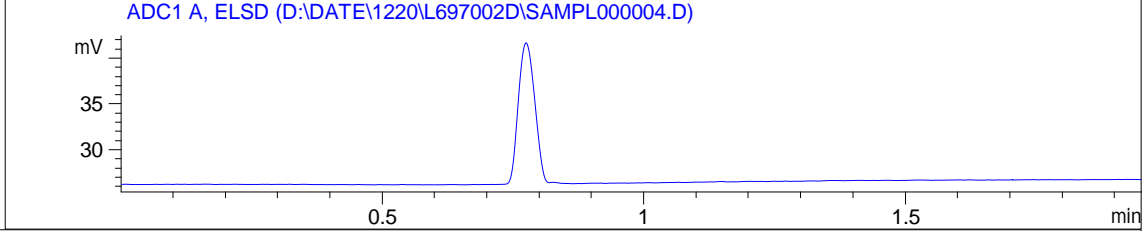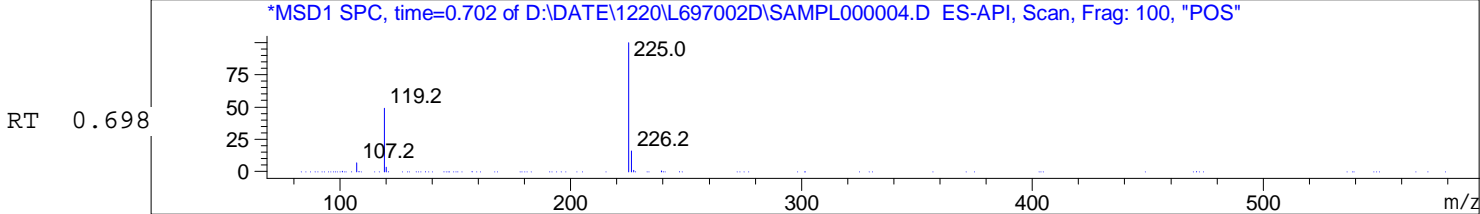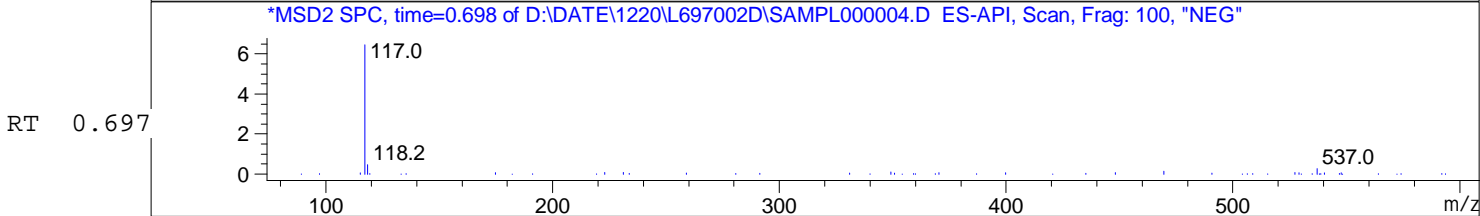



MaxPeak: 100.00%  
Ret\_Time: 0.672 min

# CLQ379840

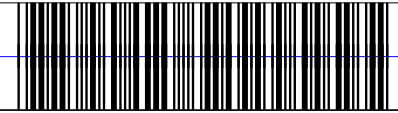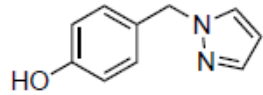

5c

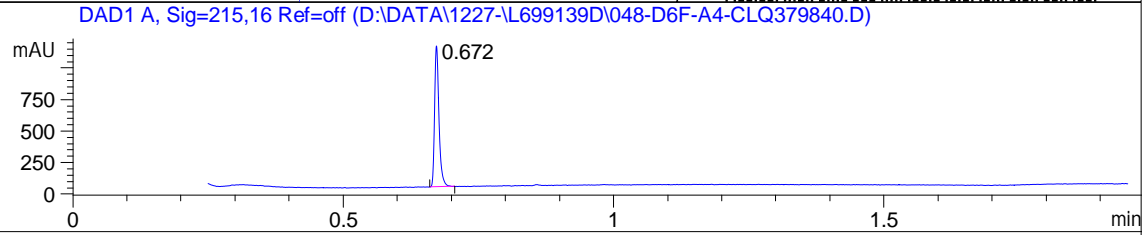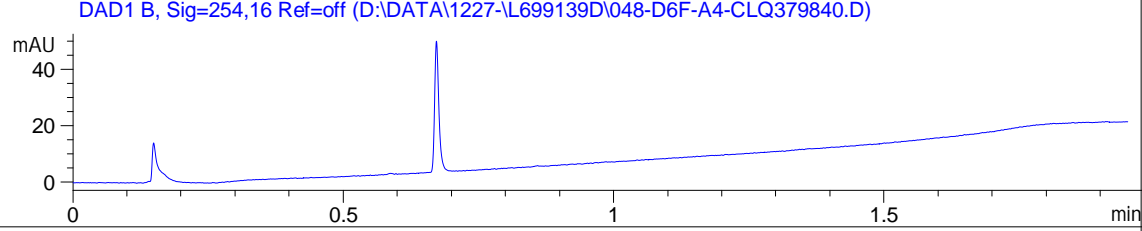

Mol Wt  
Exact Mass

| # | Time  | Area%  |
|---|-------|--------|
| 1 | 0.672 | 100.00 |

0

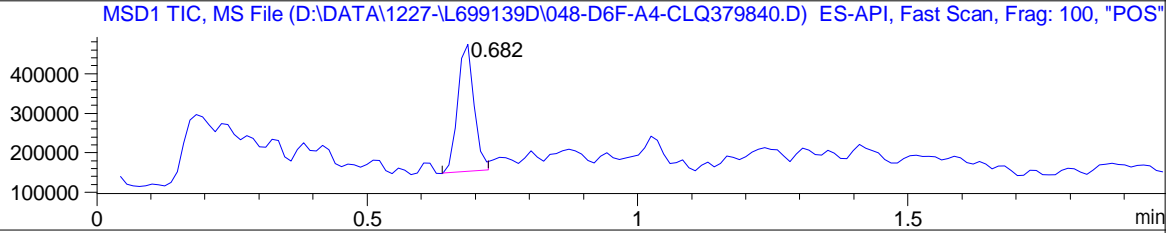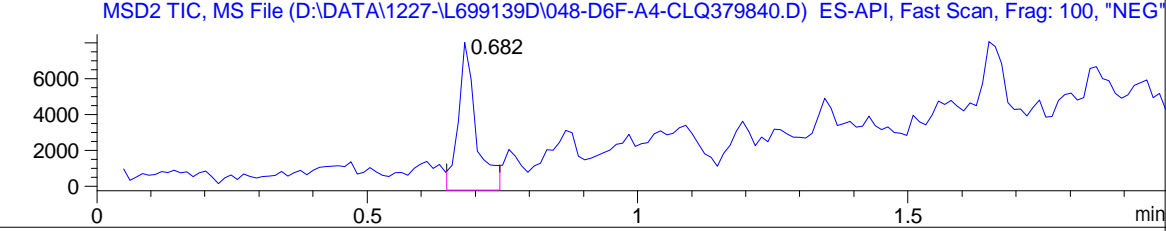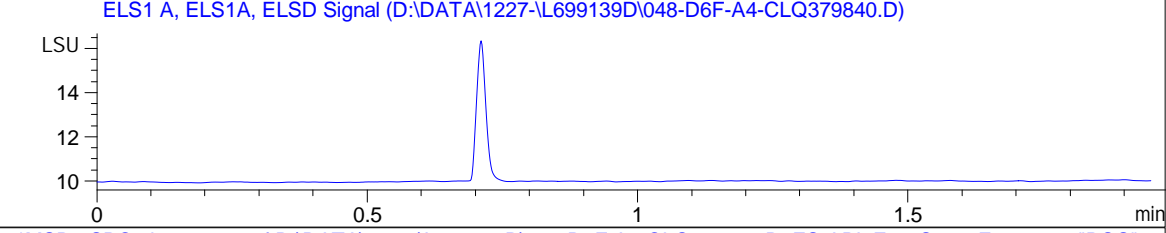

RT 0.682

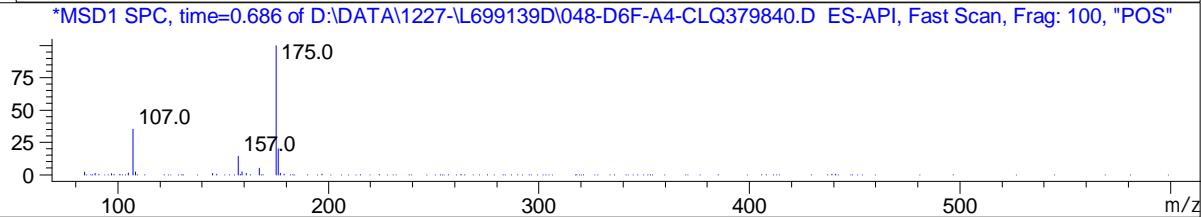

RT 0.682

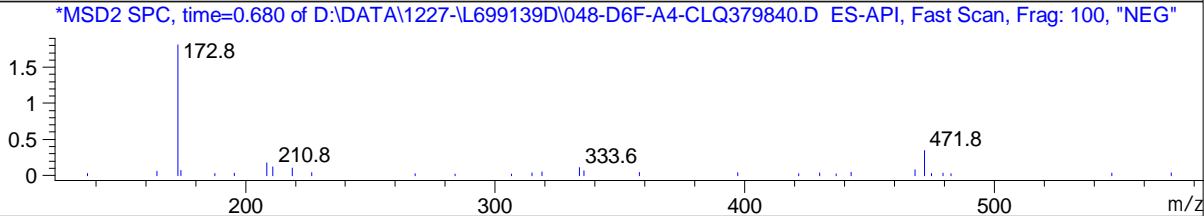

MaxPeak: 97.13%  
Ret\_Time: 0.937 min

CLQ379837

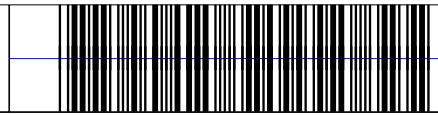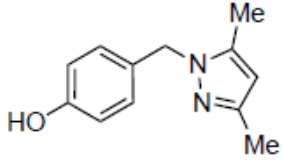

0

Mol Wt  
Exact Mass

| # | Time  | Area% |
|---|-------|-------|
| 1 | 0.937 | 97.13 |
| 2 | 1.089 | 1.62  |
| 3 | 1.177 | 1.25  |

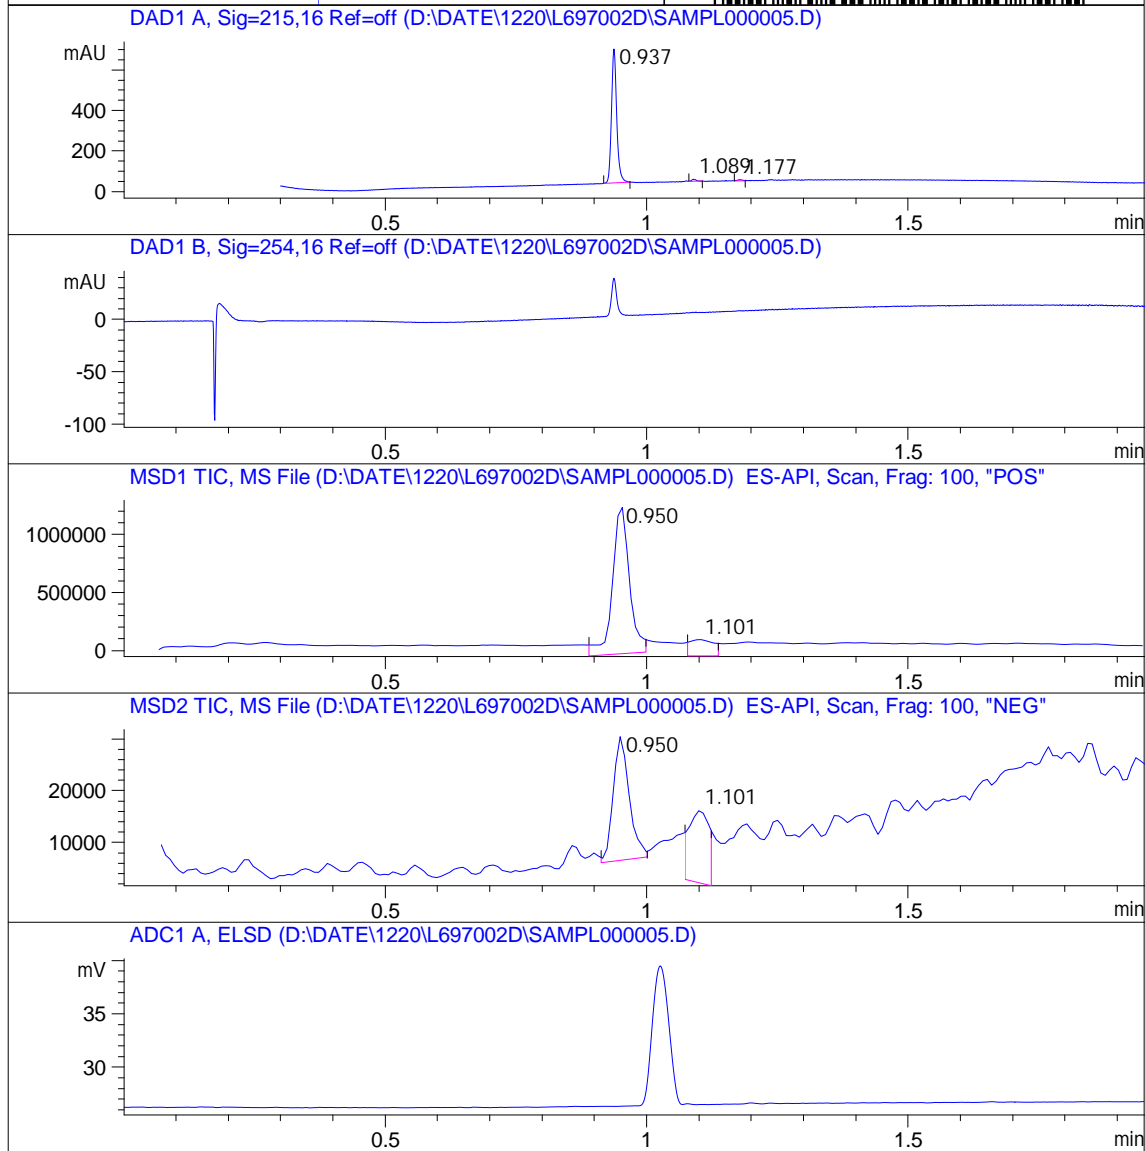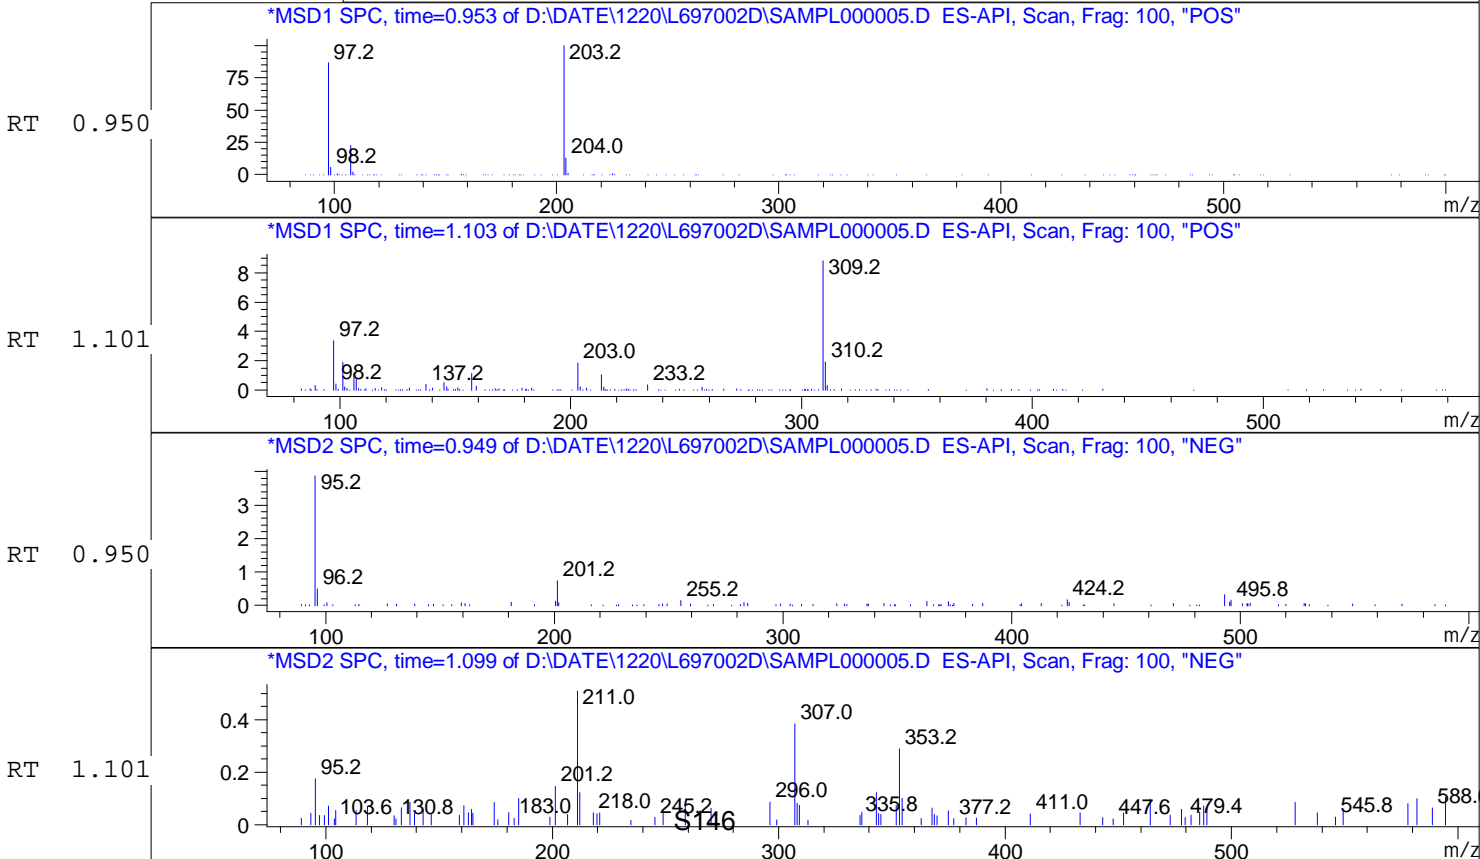

# CLQ379820

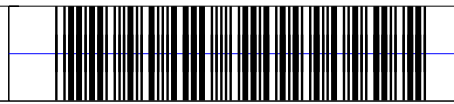

MaxPeak: 100.00%  
Ret\_Time: 0.290 min

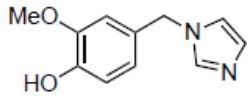

5e

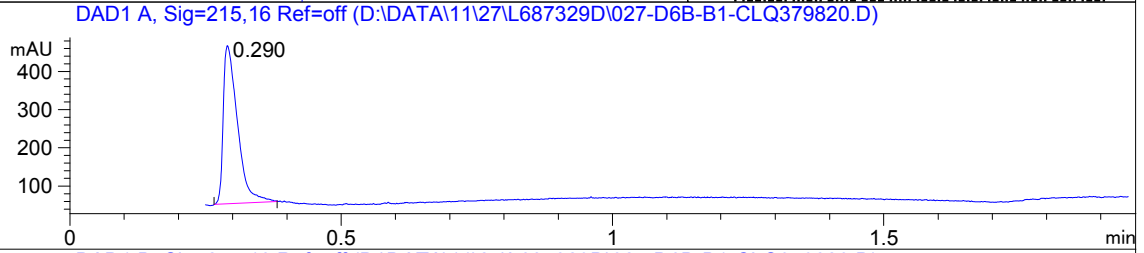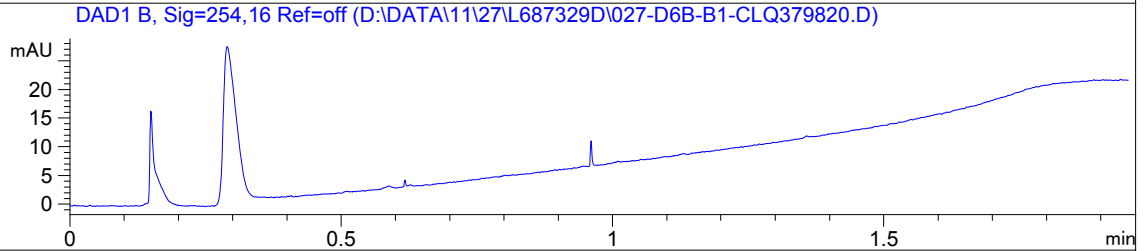

| # | Time  | Area%  |
|---|-------|--------|
| 1 | 0.290 | 100.00 |

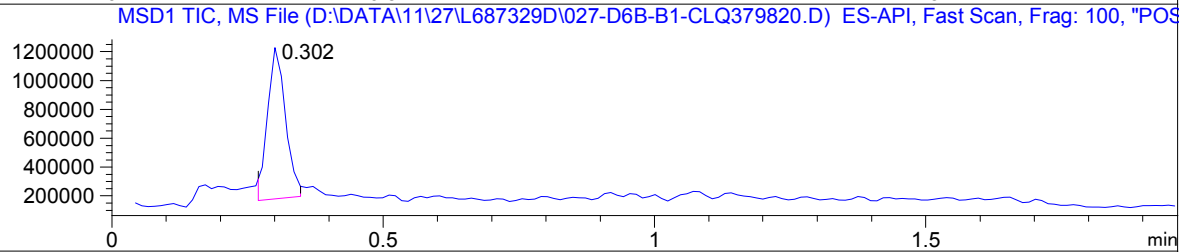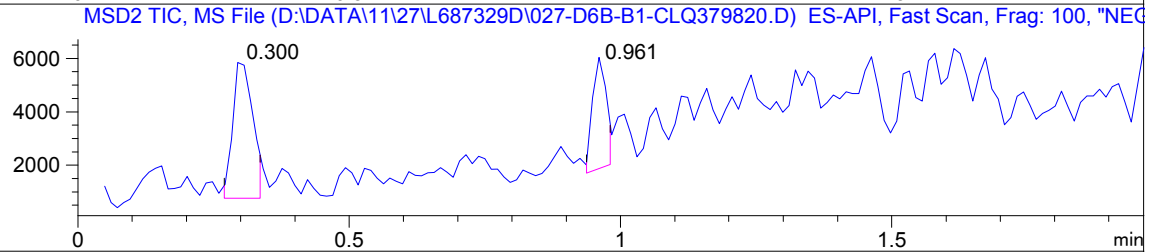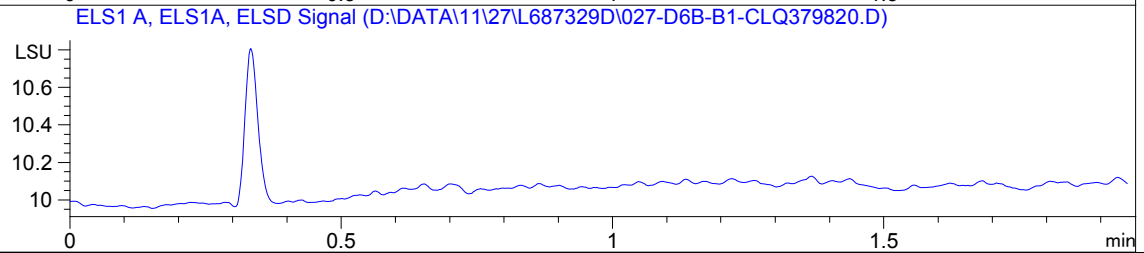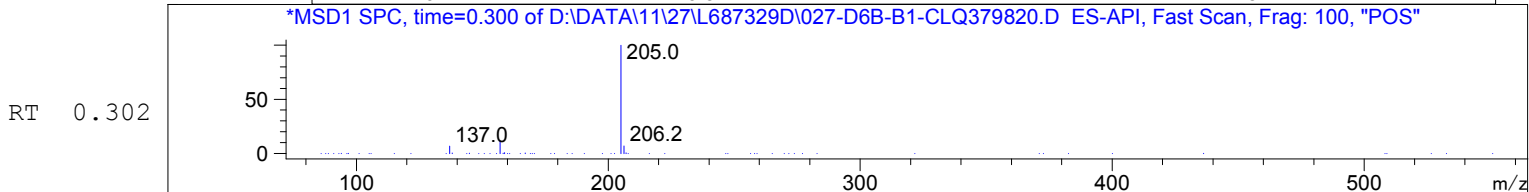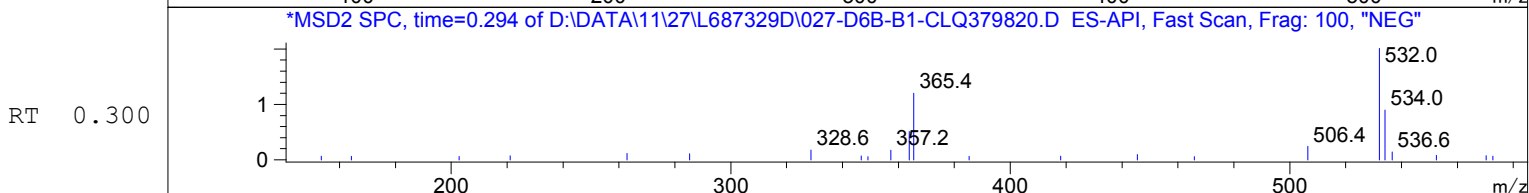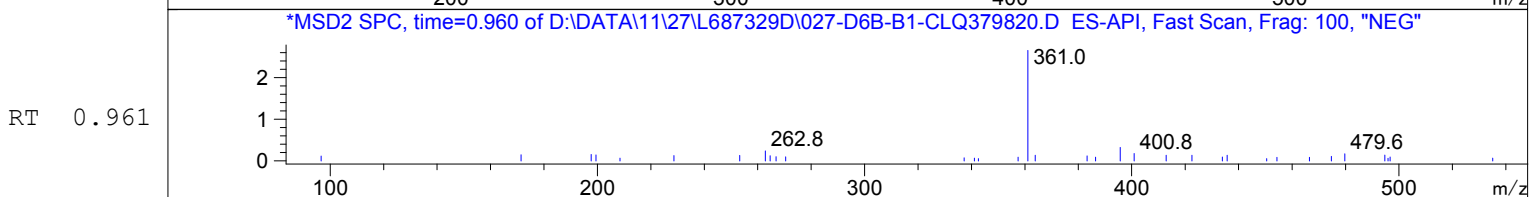

S147

# CLQ379821

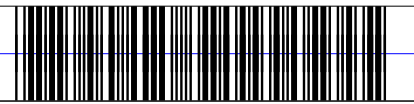

MaxPeak: 100.00%  
Ret\_Time: 0.533 min

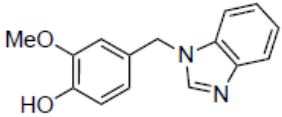

5f

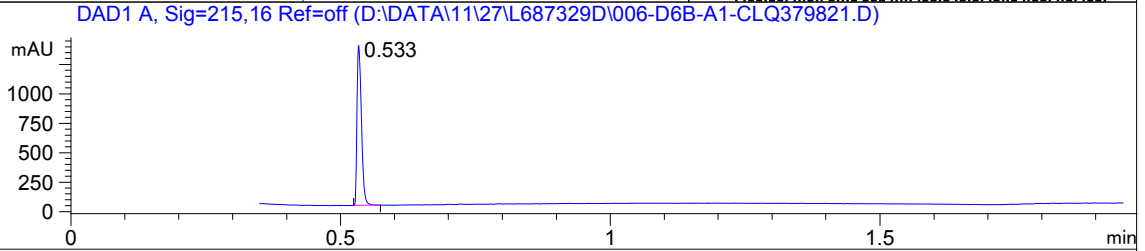

0

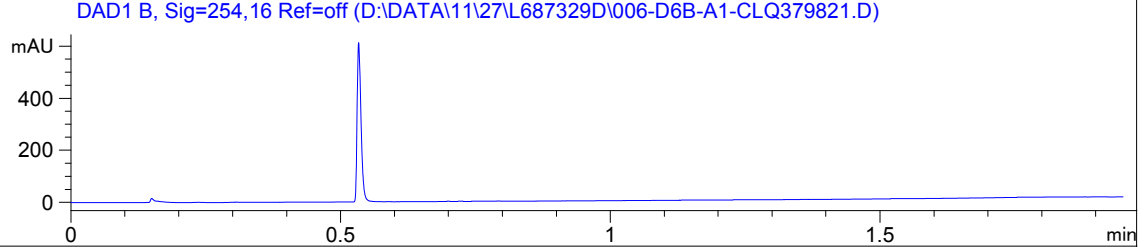

Mol Wt  
Exact Mass

| # | Time  | Area%  |
|---|-------|--------|
| 1 | 0.533 | 100.00 |

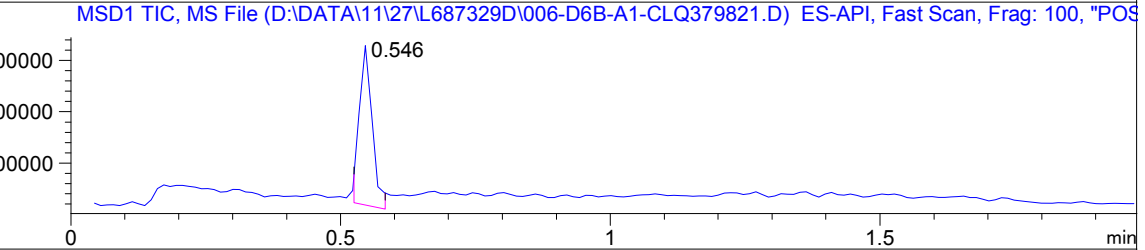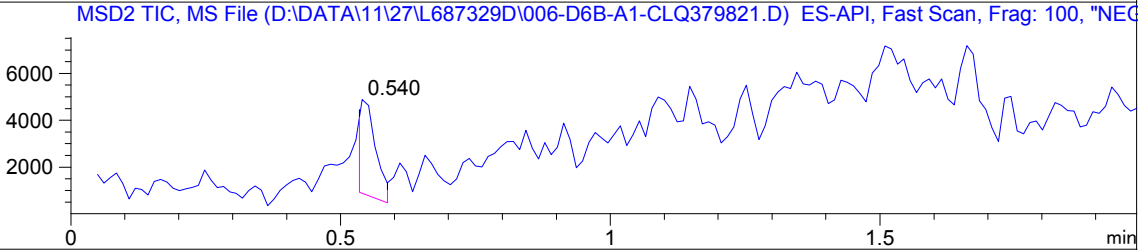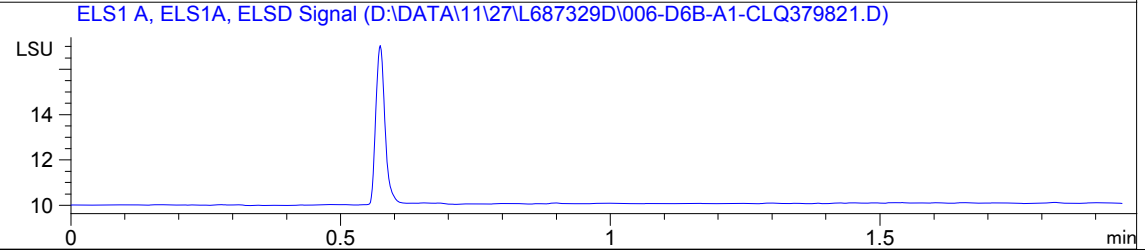

RT 0.546

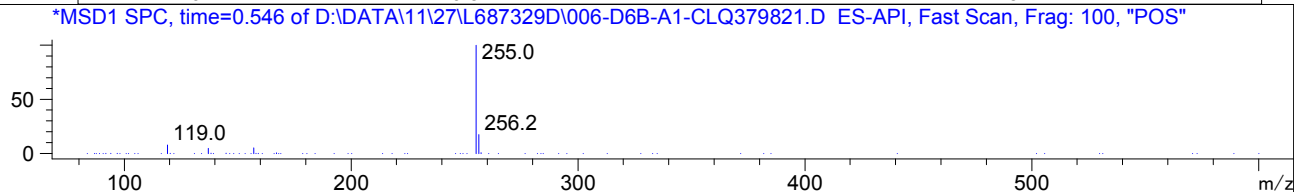

RT 0.540

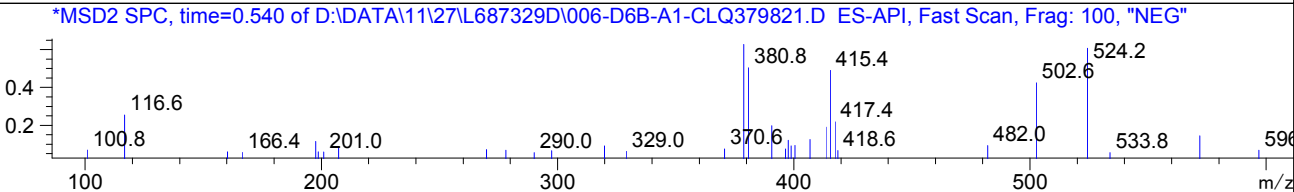

MaxPeak: 100.00%  
Ret\_Time: 0.916 min

# CLQ379832

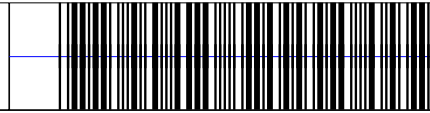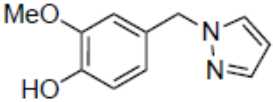

5g

Mol Wt  
Exact Mass

0

| # | Time  | Area%  |
|---|-------|--------|
| 1 | 0.916 | 100.00 |

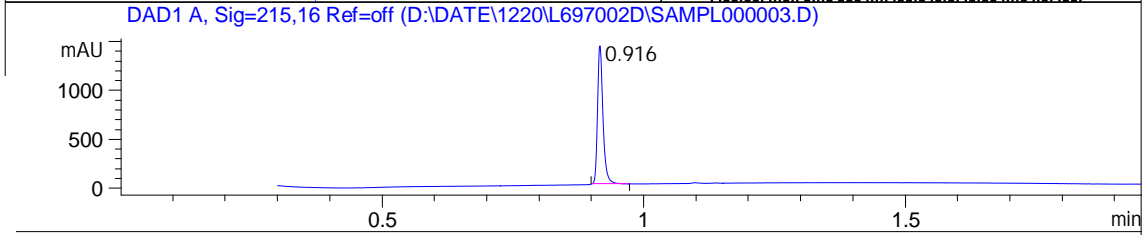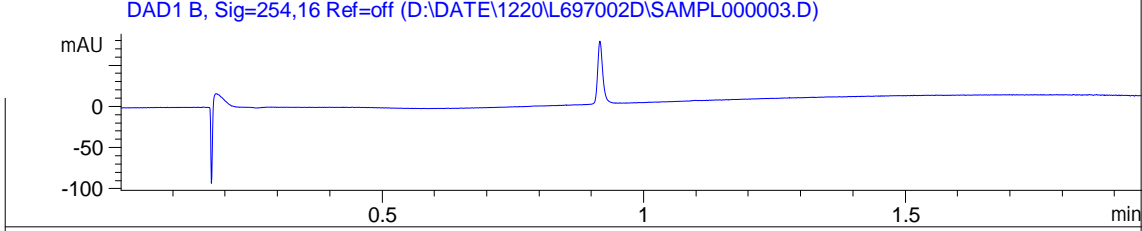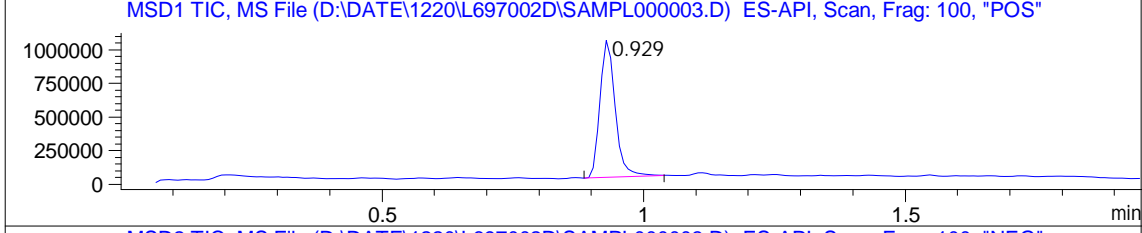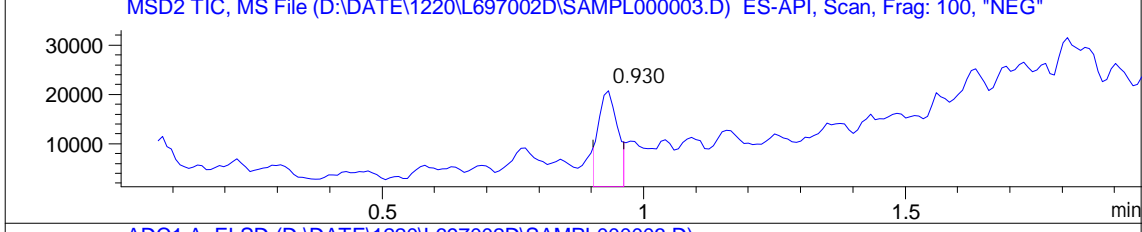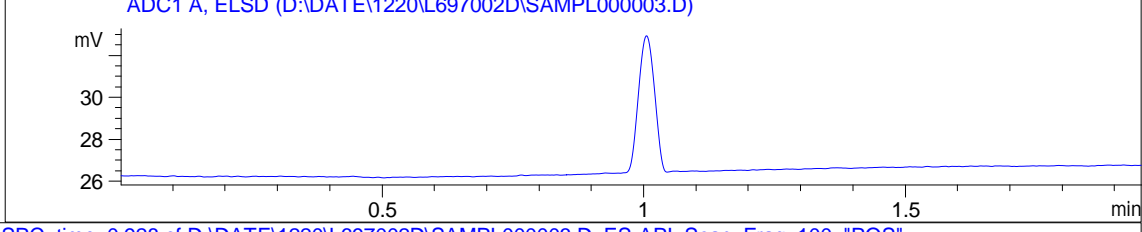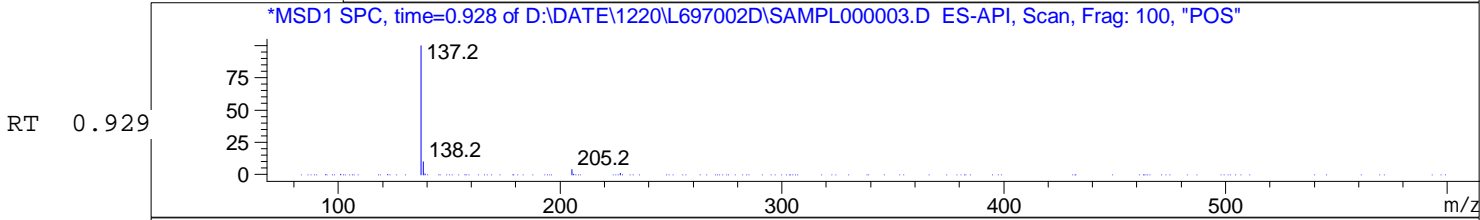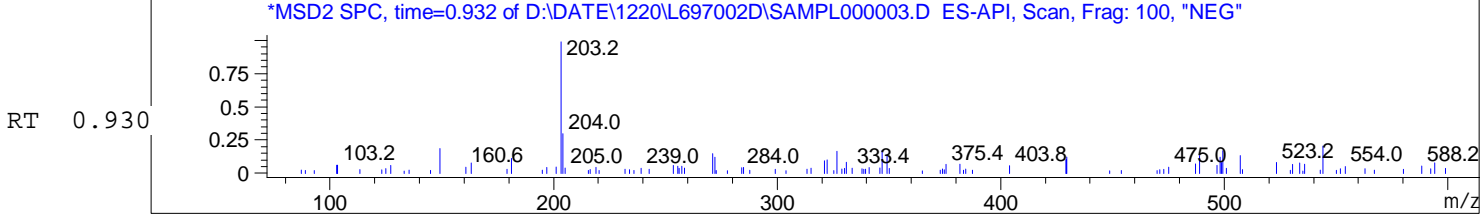

MaxPeak: 100.00%  
Ret\_Time: 0.984 min

# CLQ379833

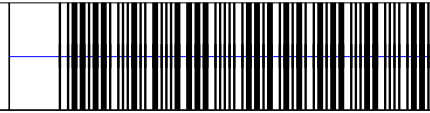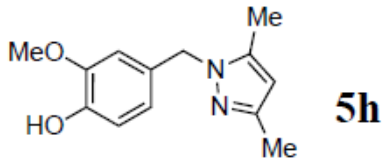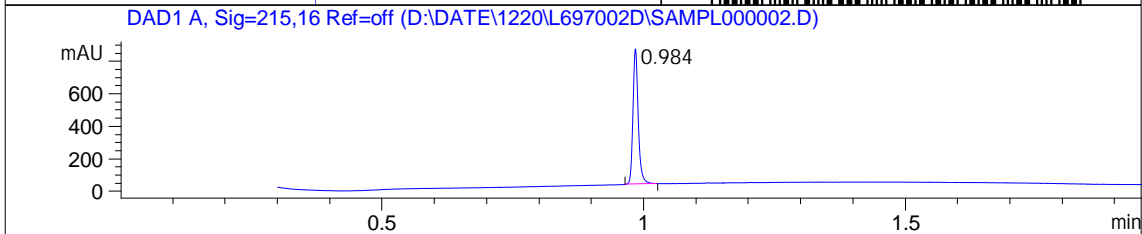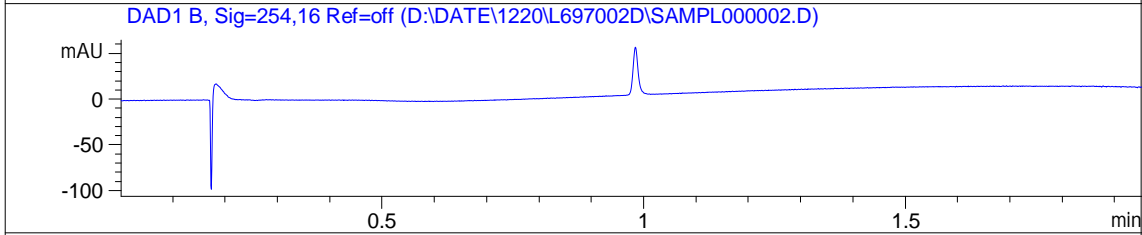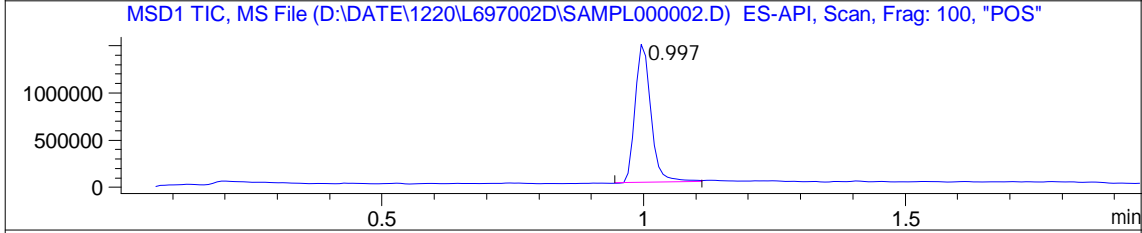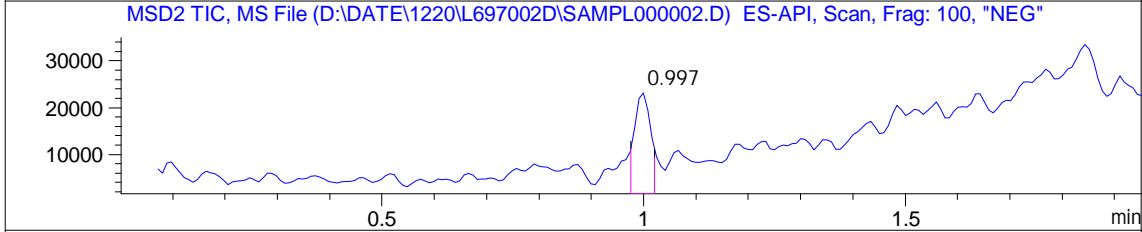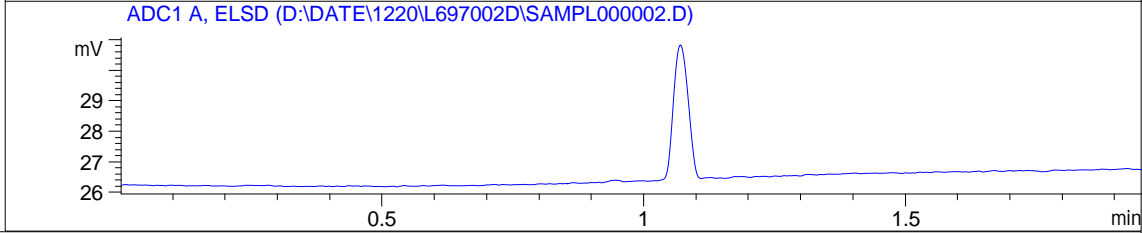

**Mol Wt**  
**Exact Mass**

| # | Time  | Area%  |
|---|-------|--------|
| 1 | 0.984 | 100.00 |

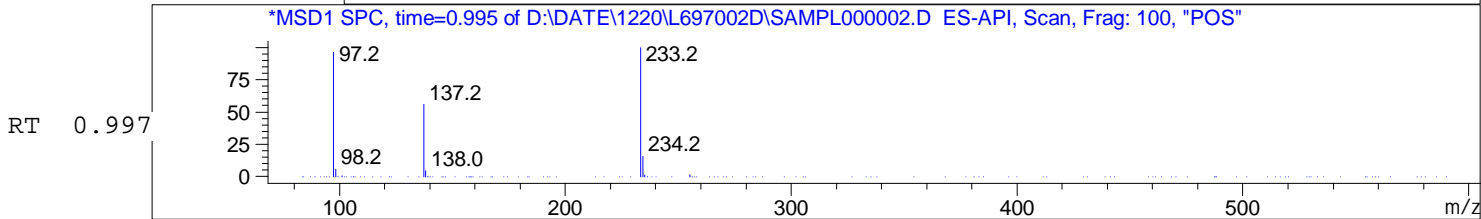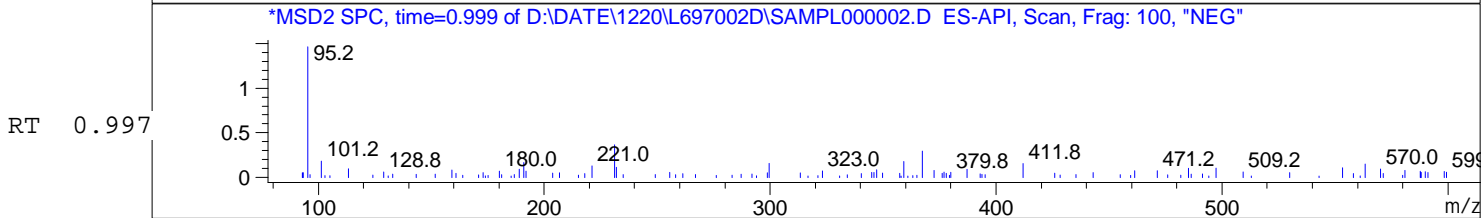

MaxPeak: 100.00%  
Ret\_Time: 1.213 min

# CLQ331159

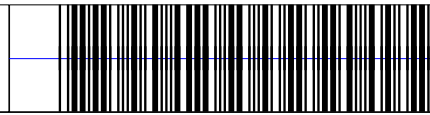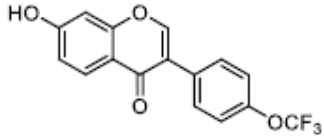

6j

Mol Wt  
Exact Mass

0

| # | Time  | Area%  |
|---|-------|--------|
| 1 | 1.213 | 100.00 |

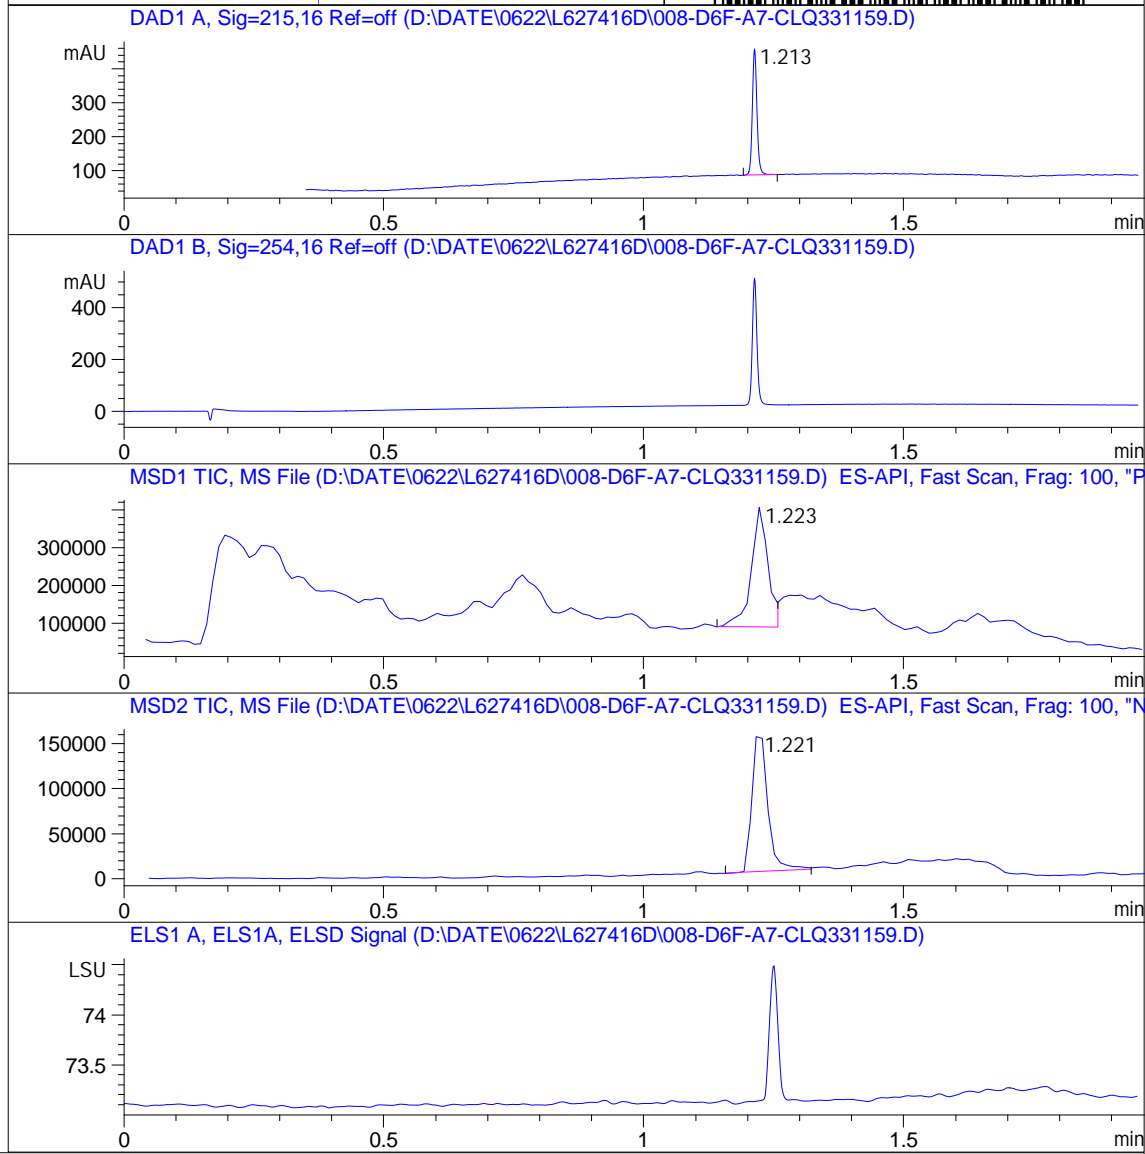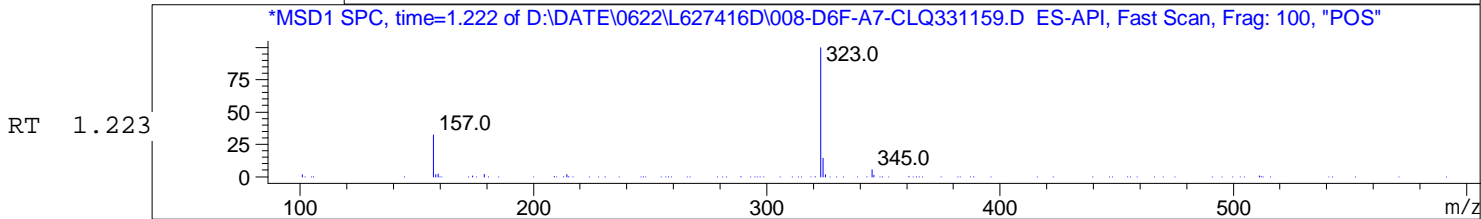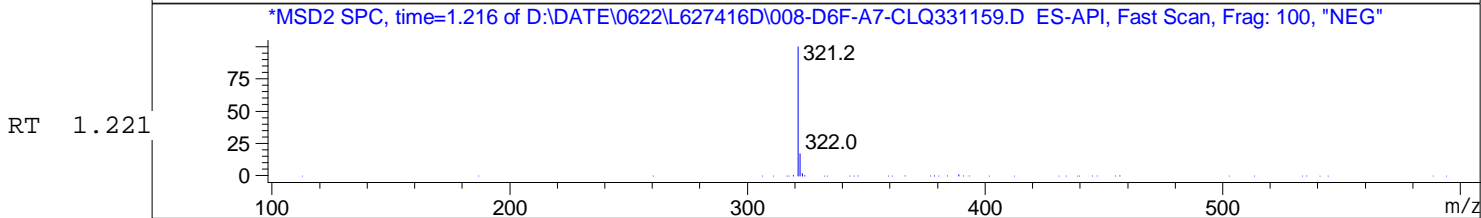

MaxPeak: 100.00%  
Ret\_Time: 0.675 min

# IBOX17995

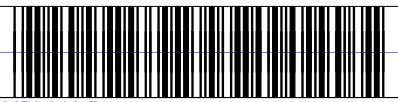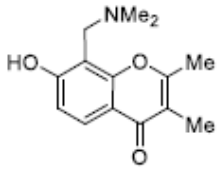

8c

Mol Wt 0  
Exact Mass

| # | Time  | Area%  |
|---|-------|--------|
| 1 | 0.675 | 100.00 |

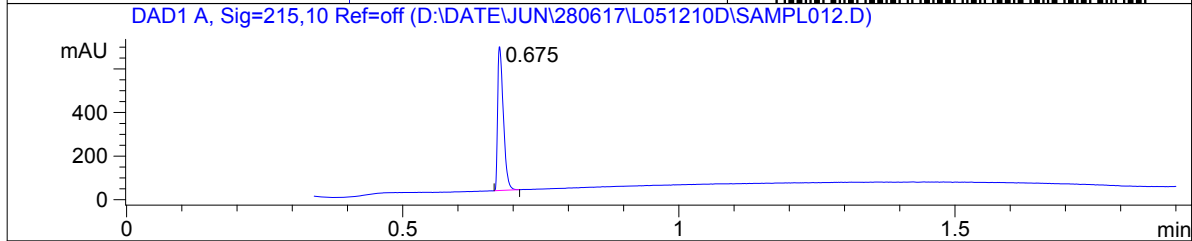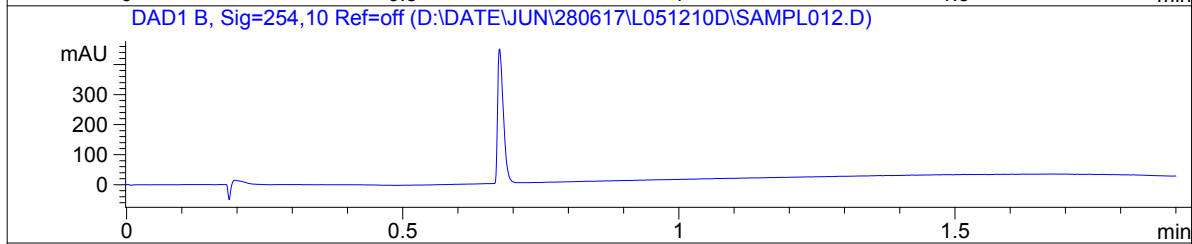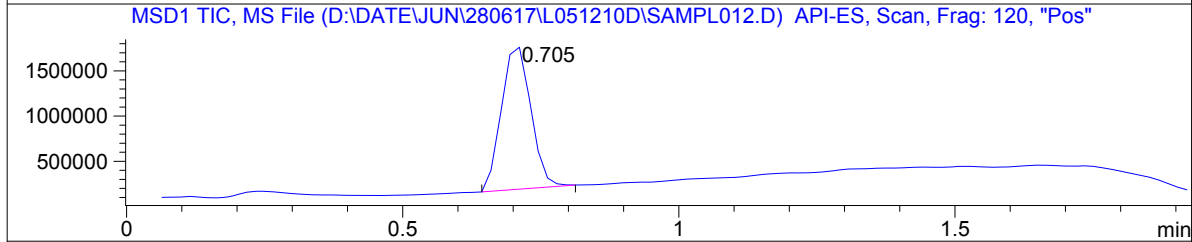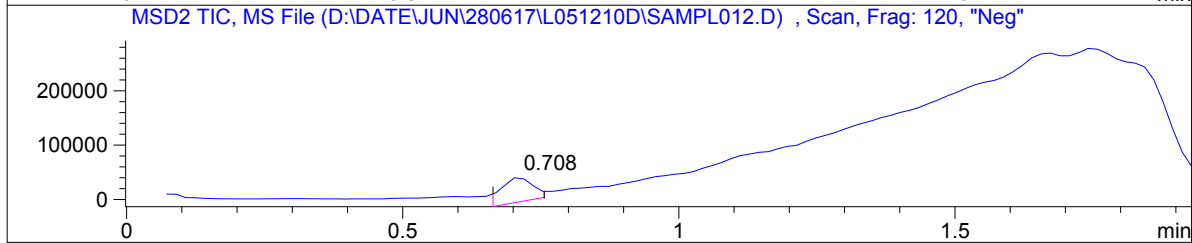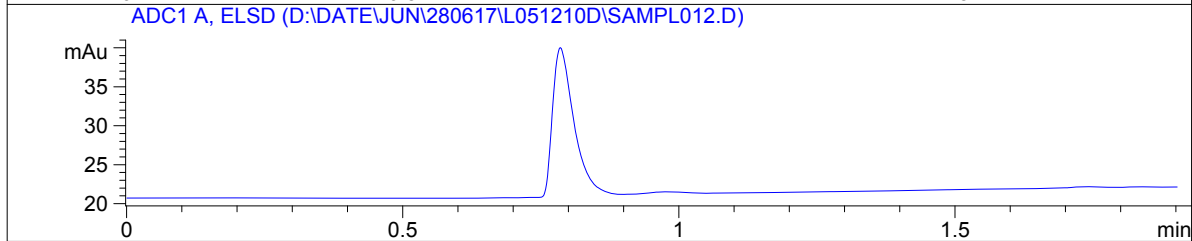

RT 0.705

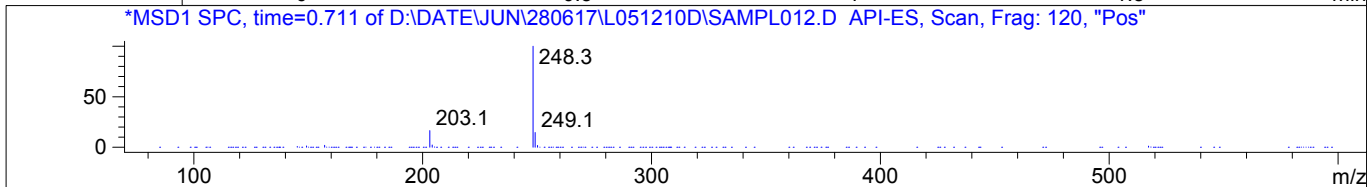

RT 0.708

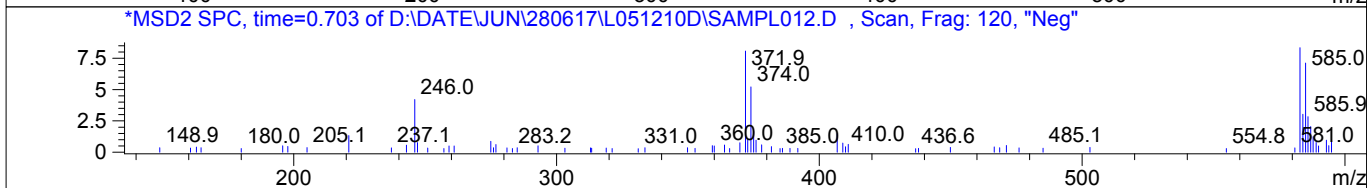



MaxPeak: 90.60%  
Ret\_Time: 0.755 min

# IBOX14058

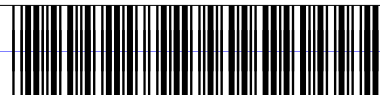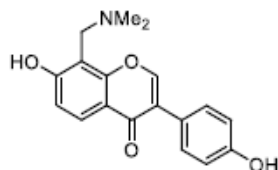

8d

Mol Wt  
Exact Mass

0

# Time Area%

| # | Time  | Area% |
|---|-------|-------|
| 1 | 0.616 | 9.40  |
| 2 | 0.755 | 90.60 |

DAD1 A, Sig=215,16 Ref=off (D:\DATE\JUN\0106\L009676D\SAMPL000009.D)

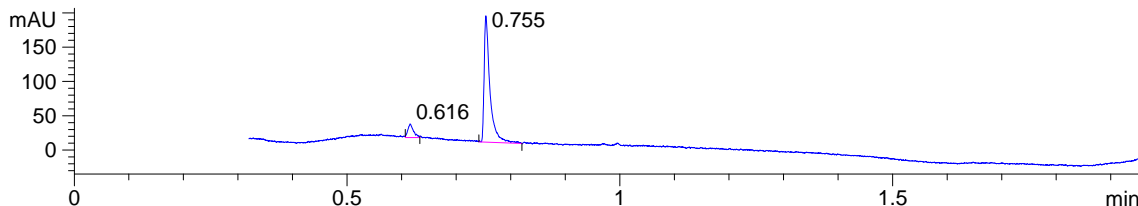

DAD1 B, Sig=254,16 Ref=off (D:\DATE\JUN\0106\L009676D\SAMPL000009.D)

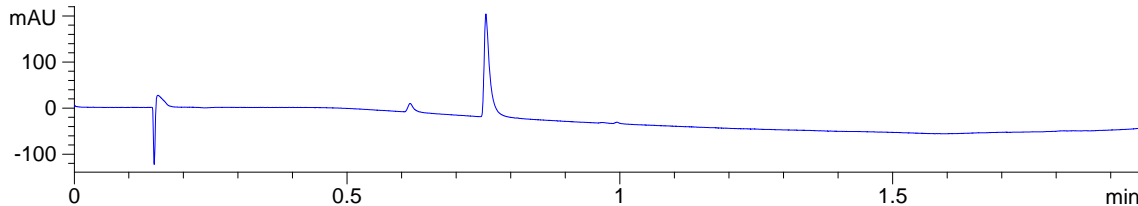

MSD1 TIC, MS File (D:\DATE\JUN\0106\L009676D\SAMPL000009.D) ES-API, Scan, Frag: 100, "POS"

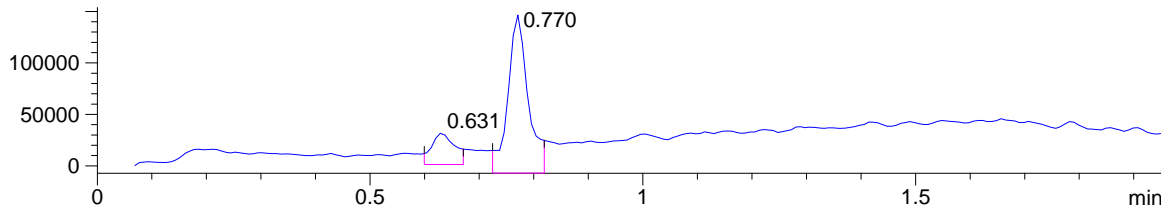

MSD2 TIC, MS File (D:\DATE\JUN\0106\L009676D\SAMPL000009.D) ES-API, Scan, Frag: 100, "NEG"

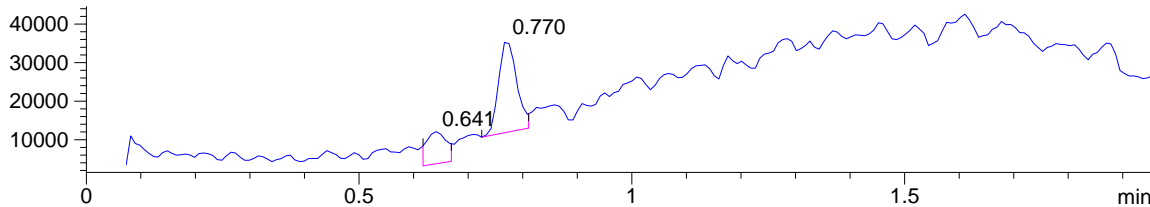

ADC1 A, ELSD (D:\DATE\JUN\0106\L009676D\SAMPL000009.D)

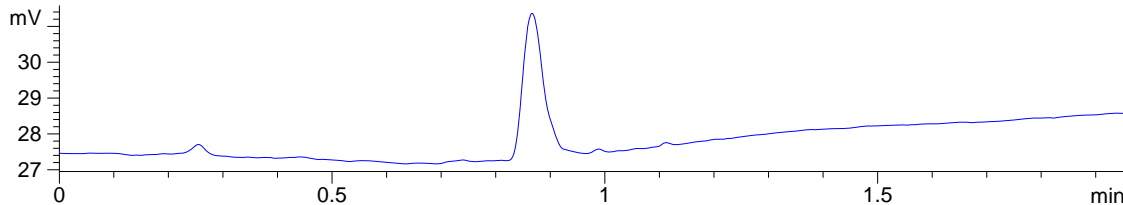

\*MSD1 SPC, time=0.629 of D:\DATE\JUN\0106\L009676D\SAMPL000009.D ES-API, Scan, Frag: 100, "POS"

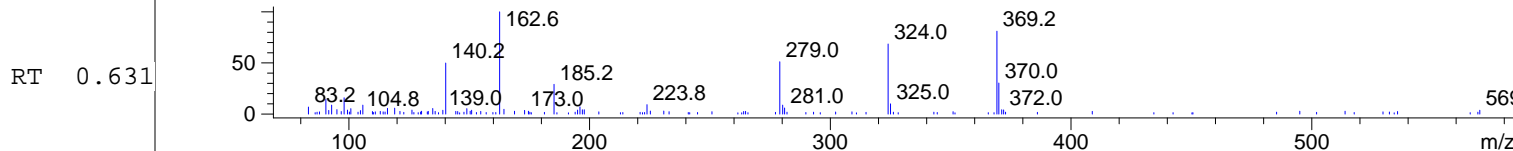

\*MSD1 SPC, time=0.771 of D:\DATE\JUN\0106\L009676D\SAMPL000009.D ES-API, Scan, Frag: 100, "POS"

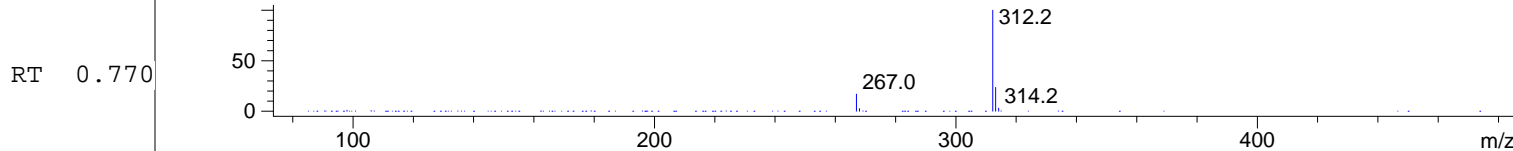

\*MSD2 SPC, time=0.641 of D:\DATE\JUN\0106\L009676D\SAMPL000009.D ES-API, Scan, Frag: 100, "NEG"

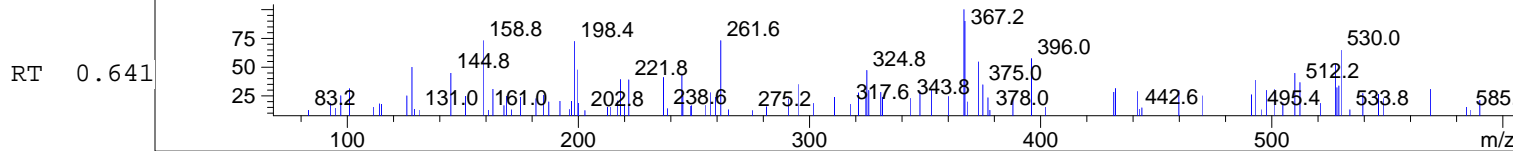

\*MSD2 SPC, time=0.767 of D:\DATE\JUN\0106\L009676D\SAMPL000009.D ES-API, Scan, Frag: 100, "NEG"

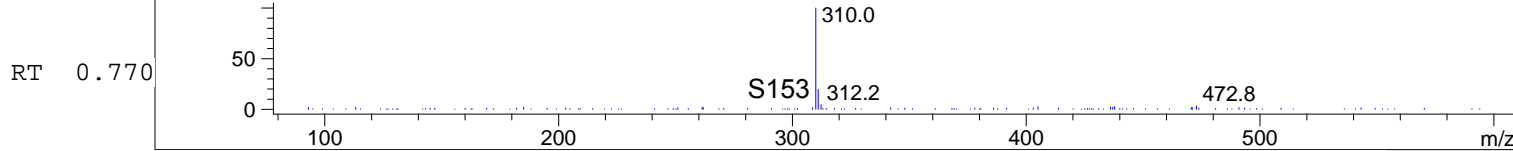

Inj.Date 6/1/2016

A P2-A-09 -5- Acq. Method C:\CHEM32\ -> ->

# CLQ331161

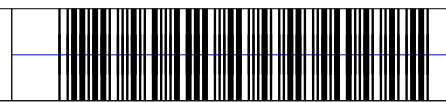

MaxPeak: 100.00%  
Ret\_Time: 1.116 min

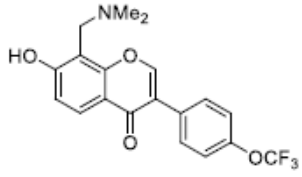

8j

Mol Wt  
Exact Mass

0

| # | Time  | Area%  |
|---|-------|--------|
| 1 | 1.116 | 100.00 |

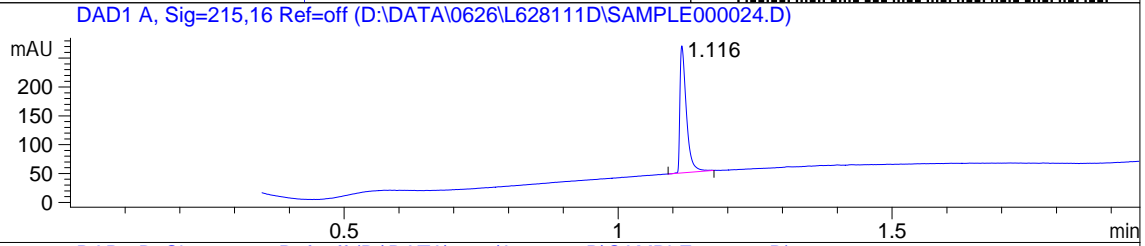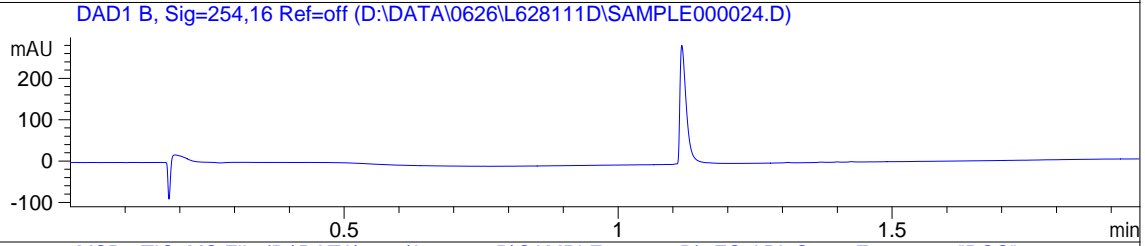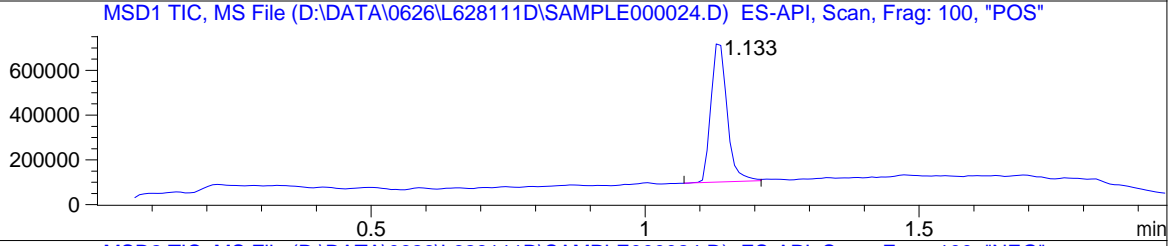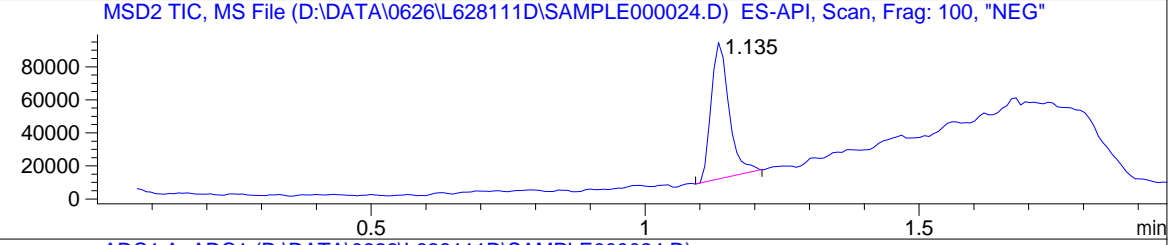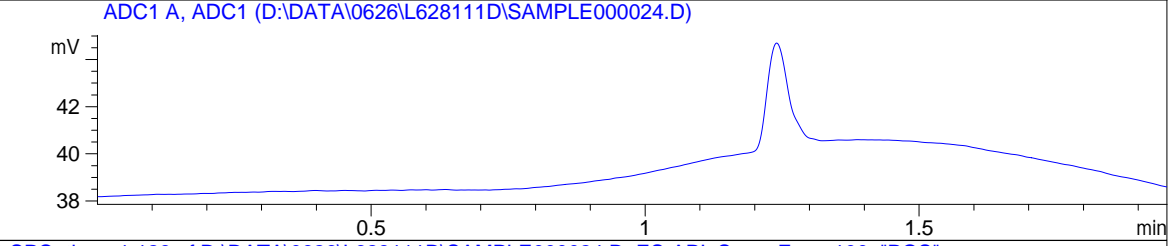

RT 1.133

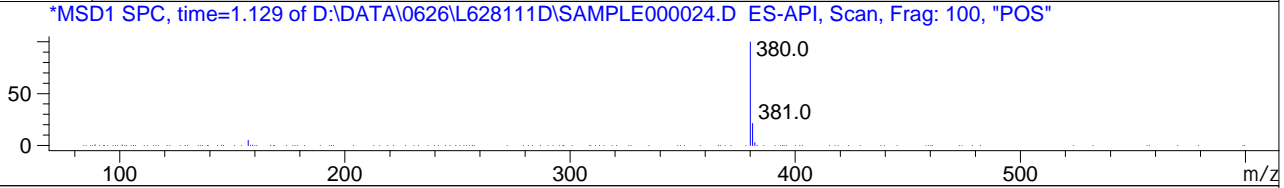

RT 1.135

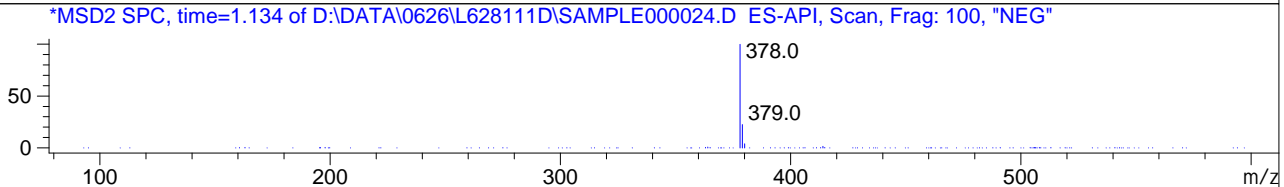

MaxPeak: 100.00%  
Ret\_Time: 0.656 min

# IBOX13648

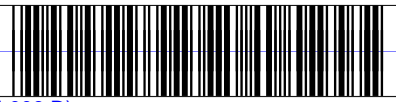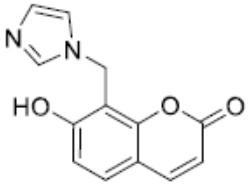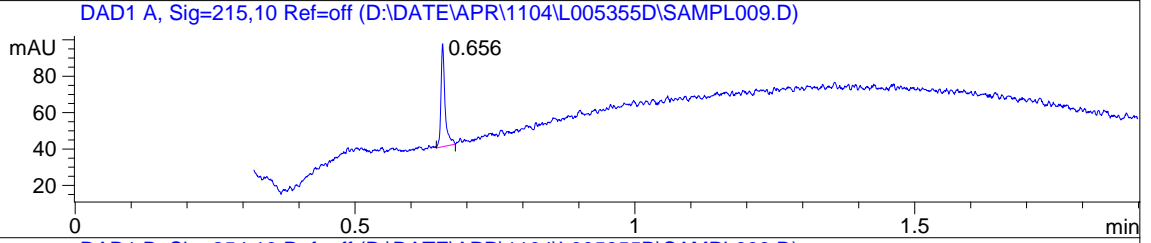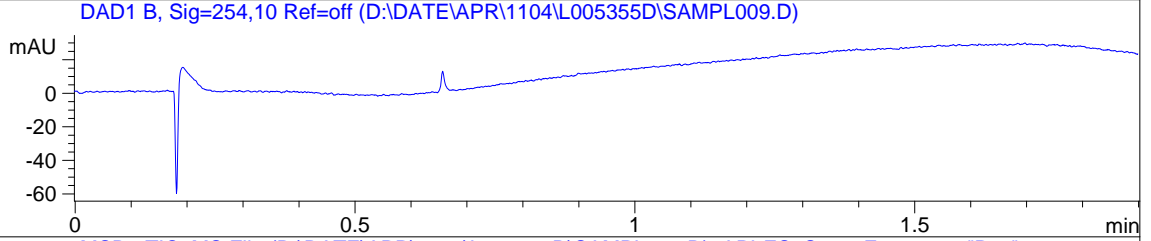

**Mol Wt**  
**Exact Mass**

| # | Time  | Area%  |
|---|-------|--------|
| 1 | 0.656 | 100.00 |

**0**

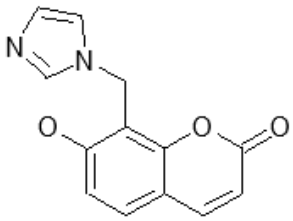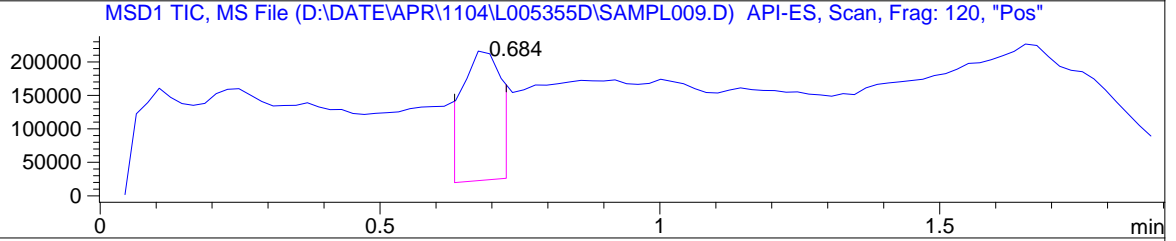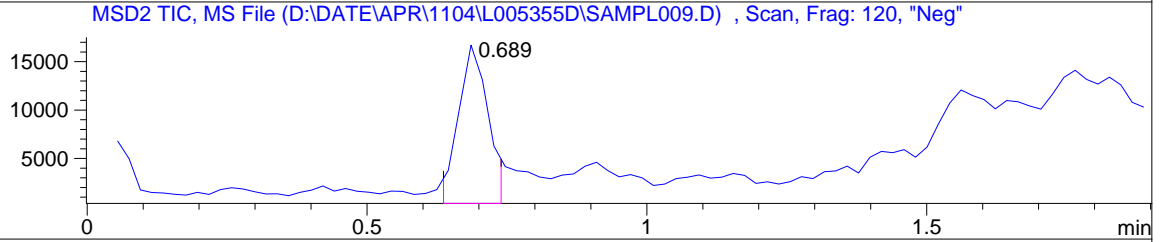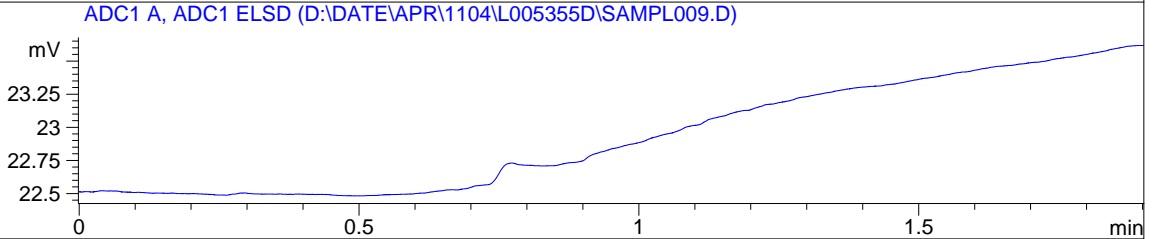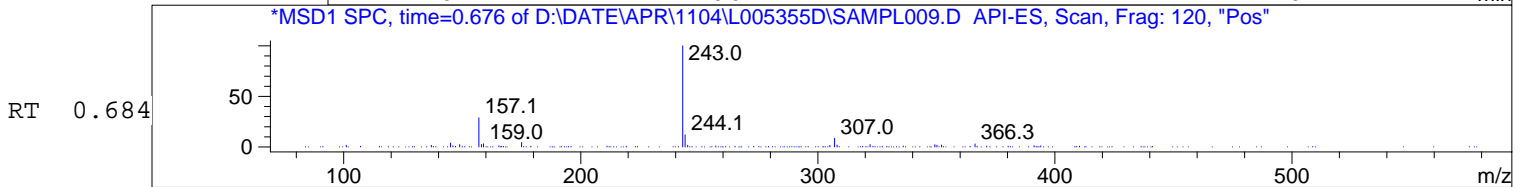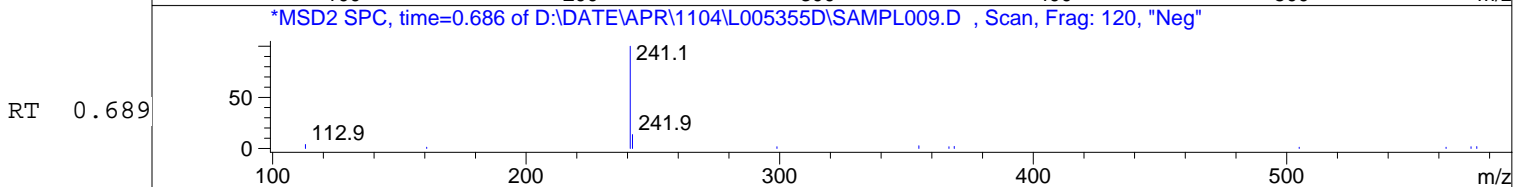

MaxPeak: 100.00%  
Ret\_Time: 0.792 min

# IBOX13627

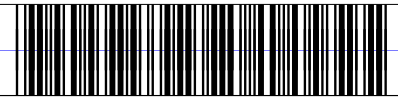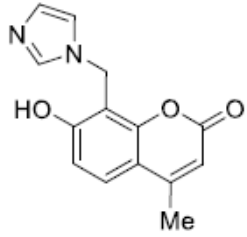

9b

0

Mol Wt  
Exact Mass

| # | Time  | Area%  |
|---|-------|--------|
| 1 | 0.792 | 100.00 |

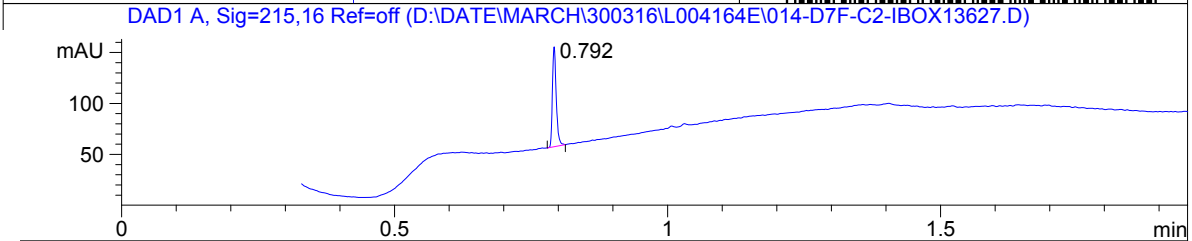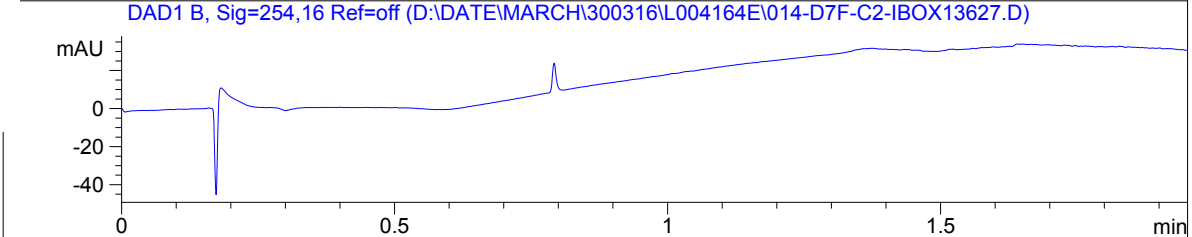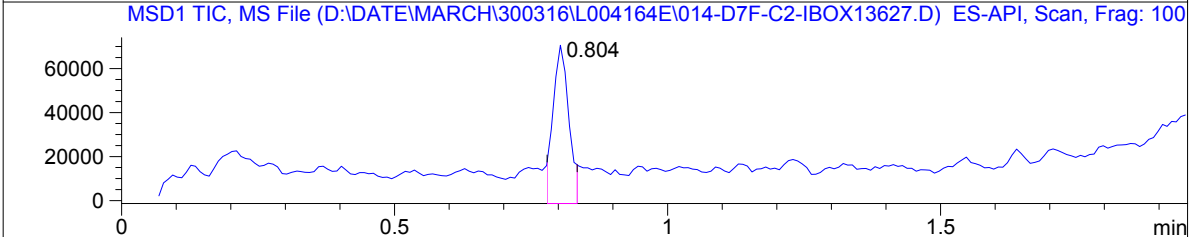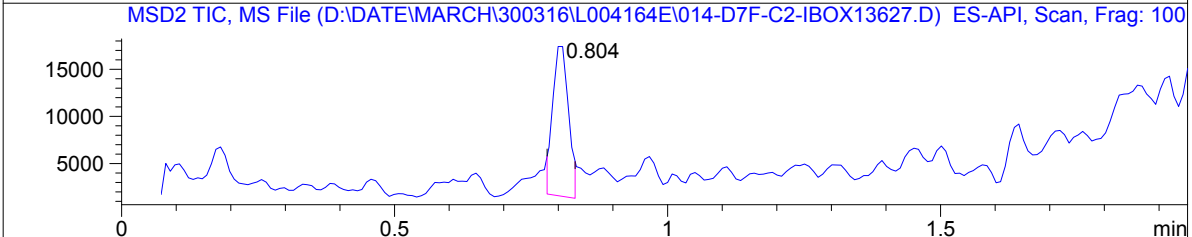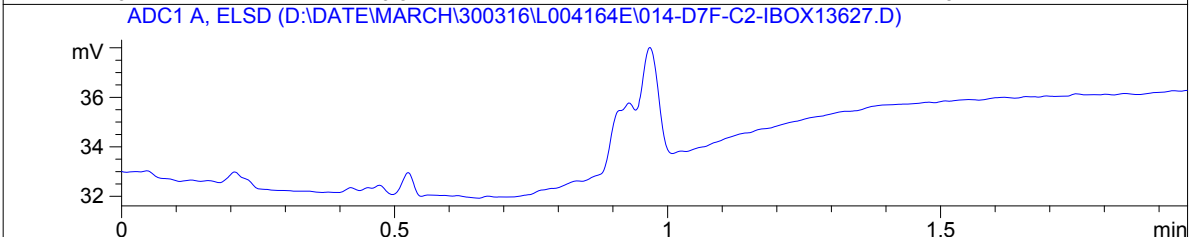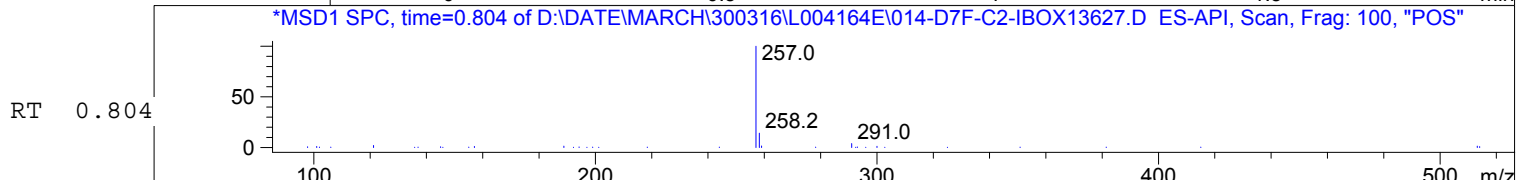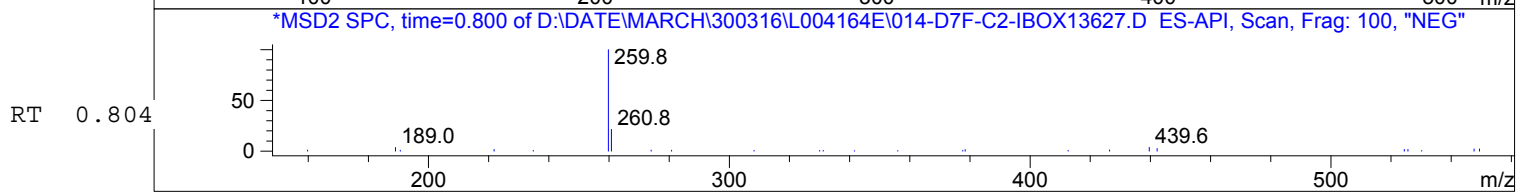

# CLQ362994

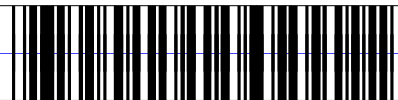

MaxPeak: 100.00%  
Ret\_Time: 0.634 min

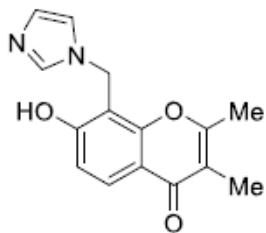

9c

Mol Wt

Exact Mass

| # | Time  | Area%  |
|---|-------|--------|
| 1 | 0.634 | 100.00 |

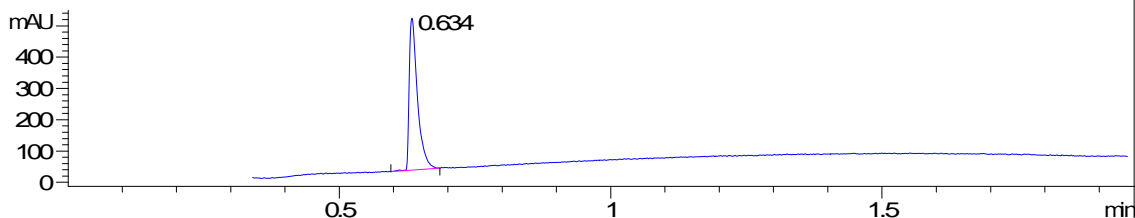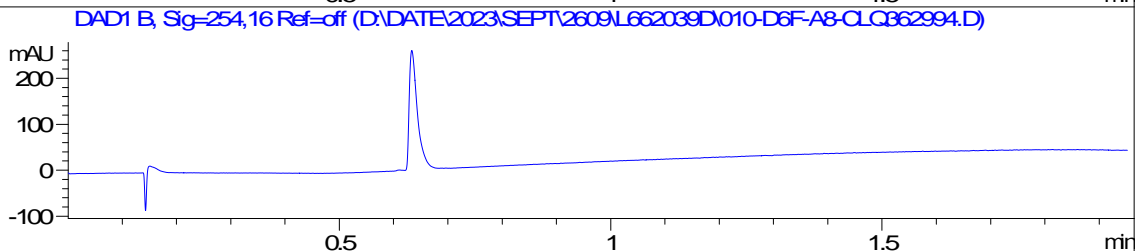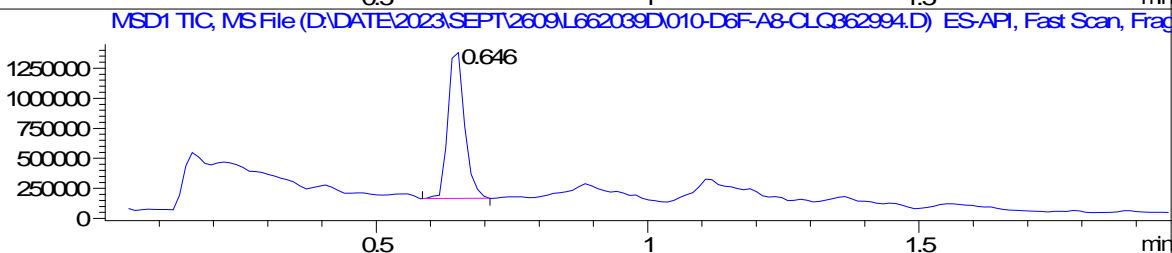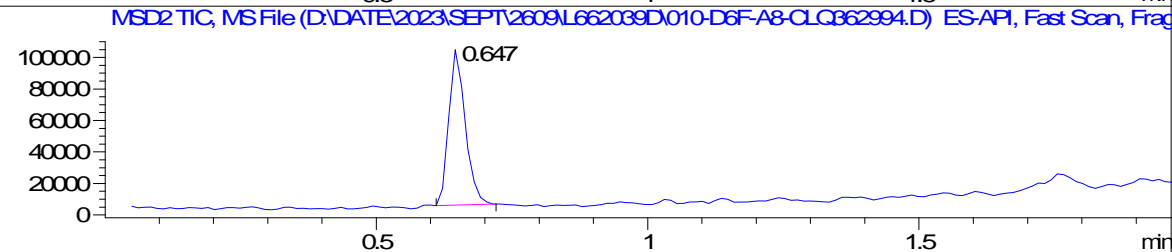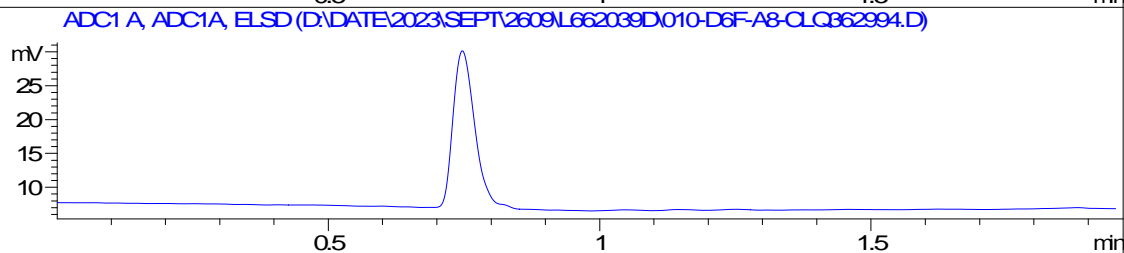

RT 0.646

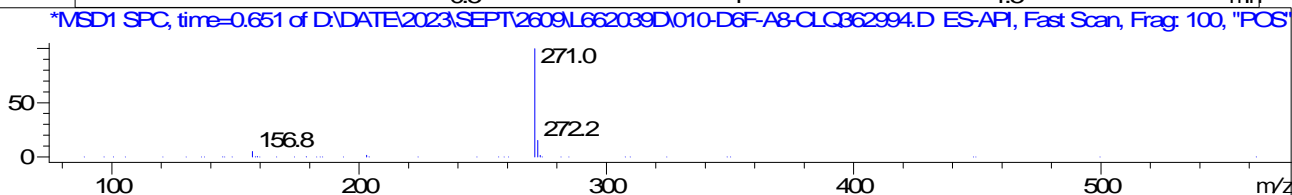

RT 0.647

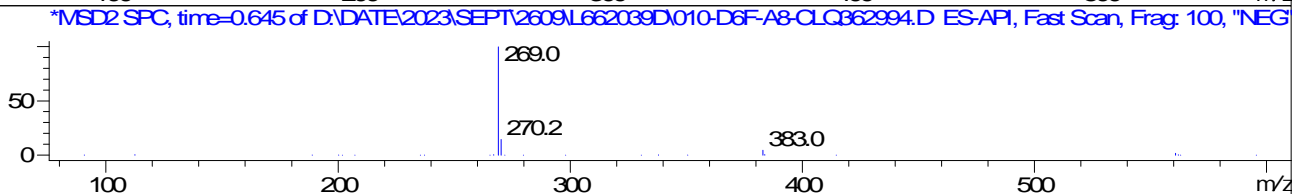

# CLQ377562

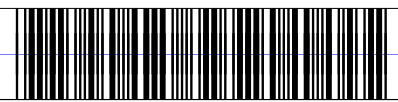

MaxPeak: 97.21%  
Ret\_Time: 0.835 min

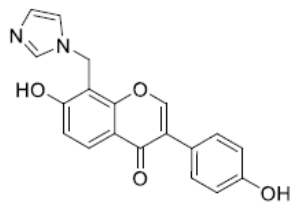

9d

Mol Wt  
Exact Mass

0

| # | Time  | Area% |
|---|-------|-------|
| 1 | 0.715 | 2.79  |
| 2 | 0.835 | 97.21 |

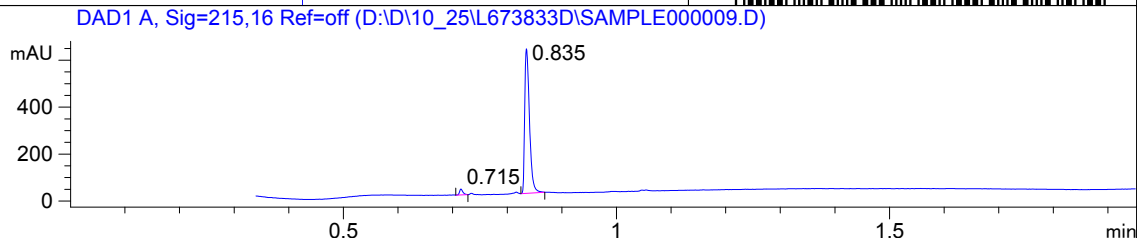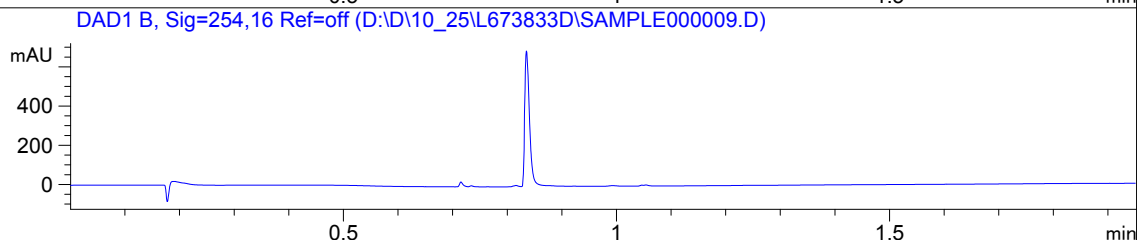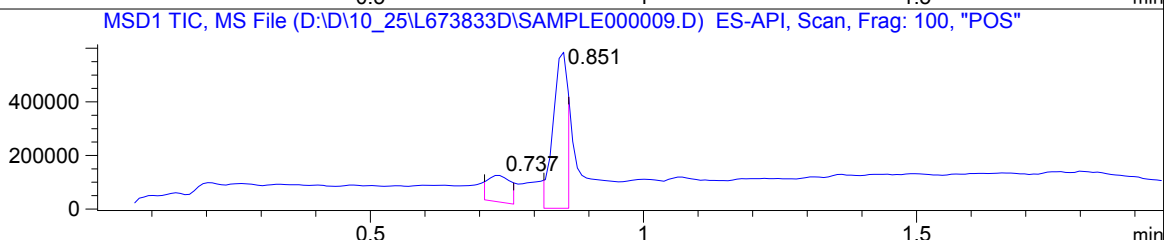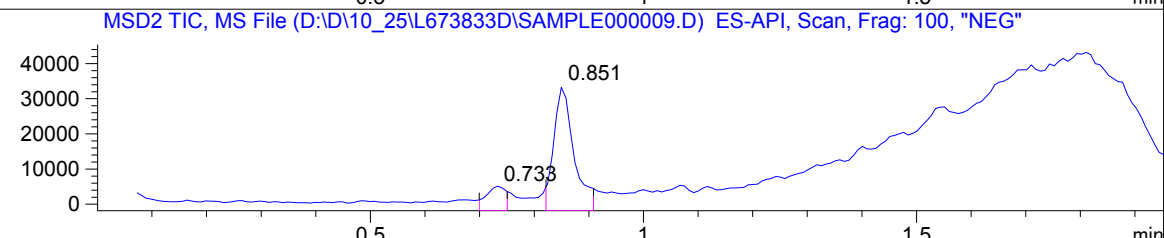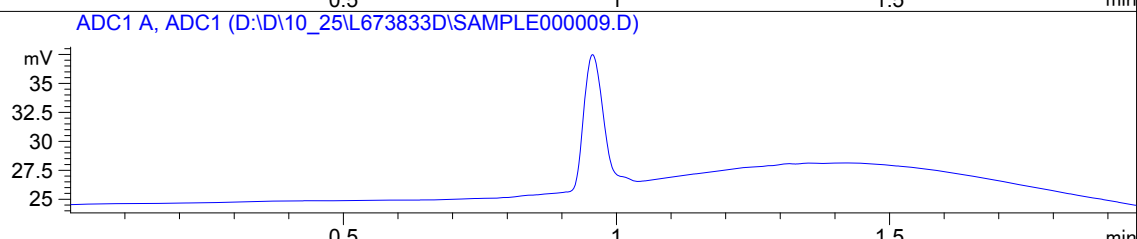

RT 0.737

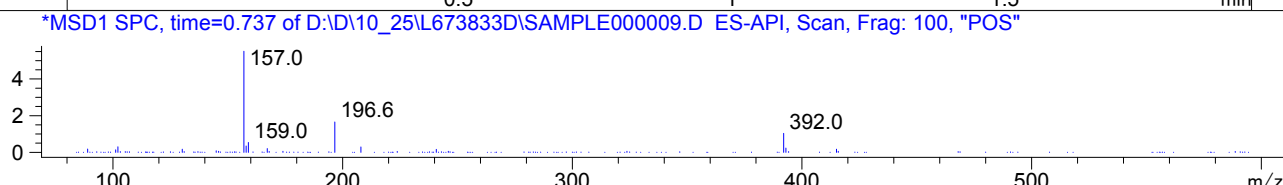

RT 0.851

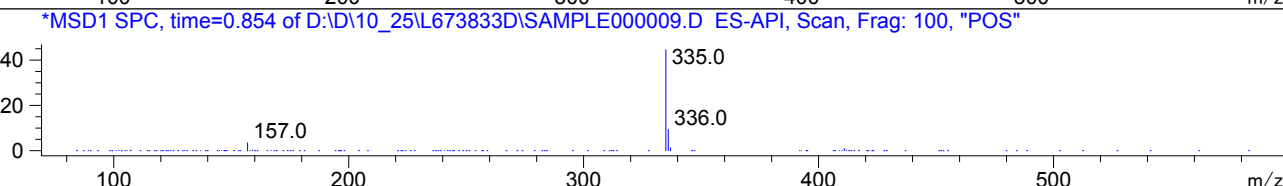

RT 0.733

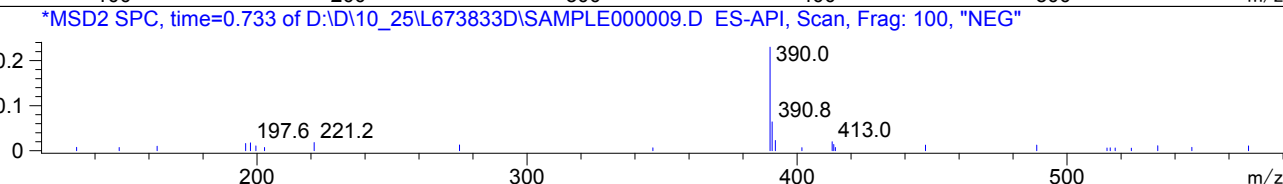

RT 0.851

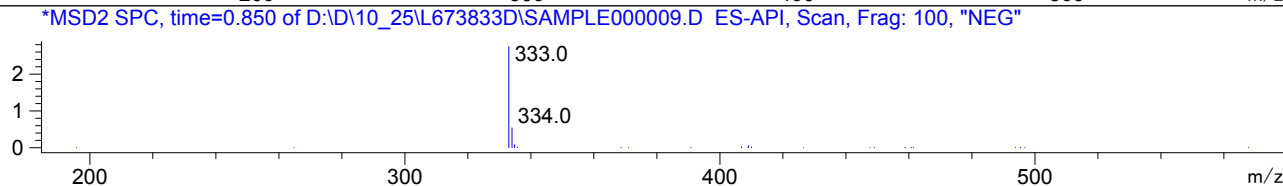

S158

MaxPeak: 91.95%  
Ret\_Time: 0.892 min

# IBOX13689

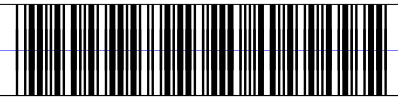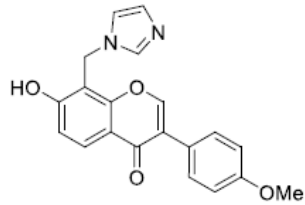

9e

Mol Wt  
Exact Mass

0

# Time Area%

| # | Time  | Area% |
|---|-------|-------|
| 1 | 0.892 | 91.95 |
| 2 | 1.185 | 8.05  |

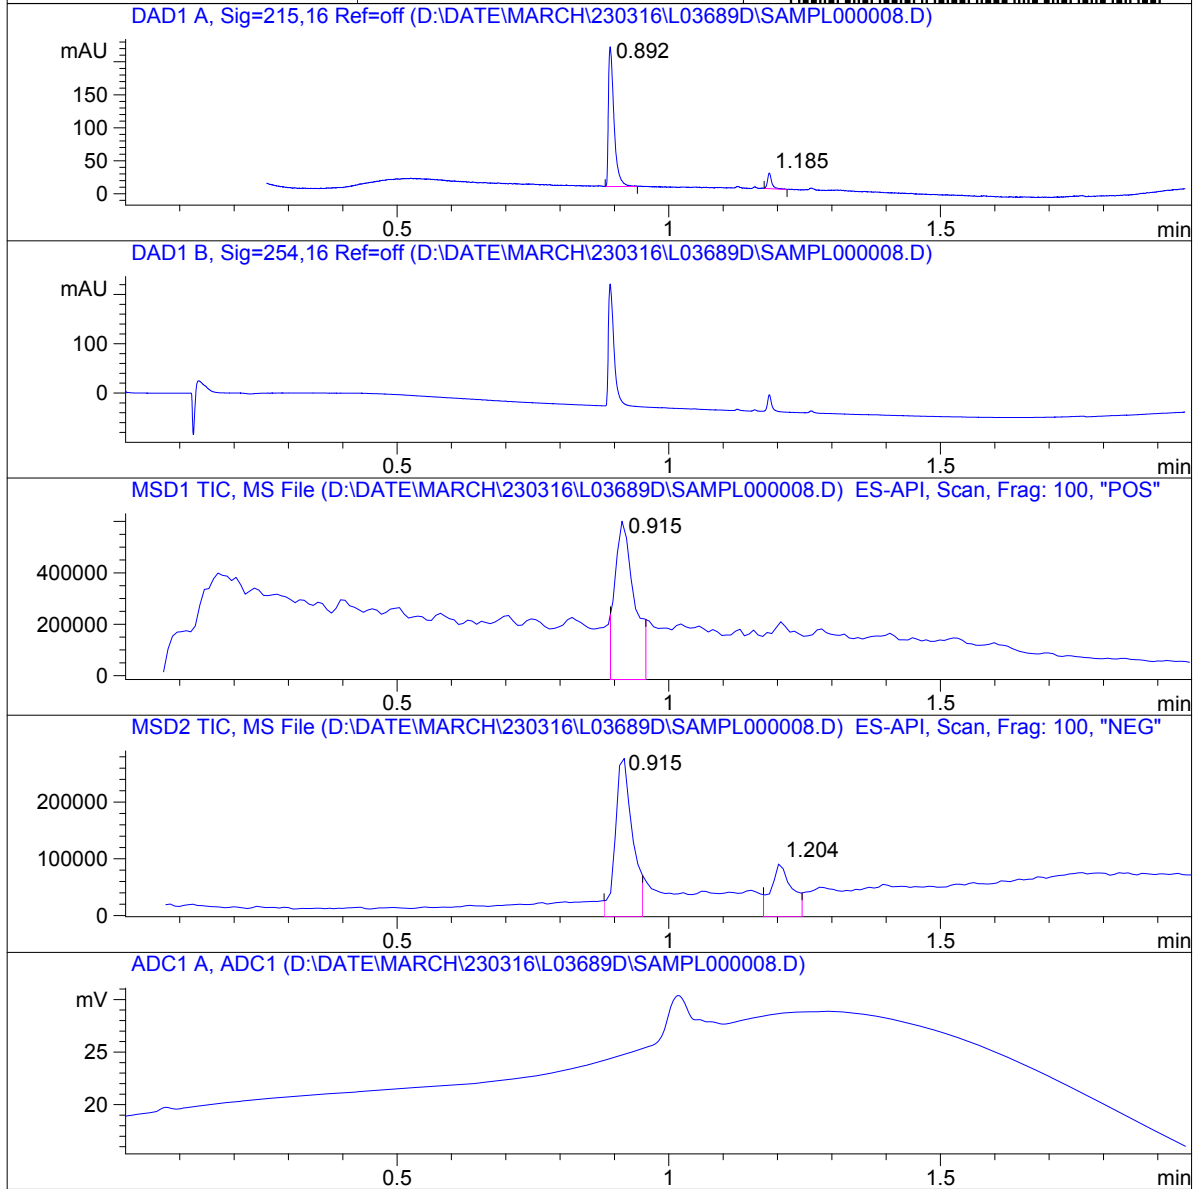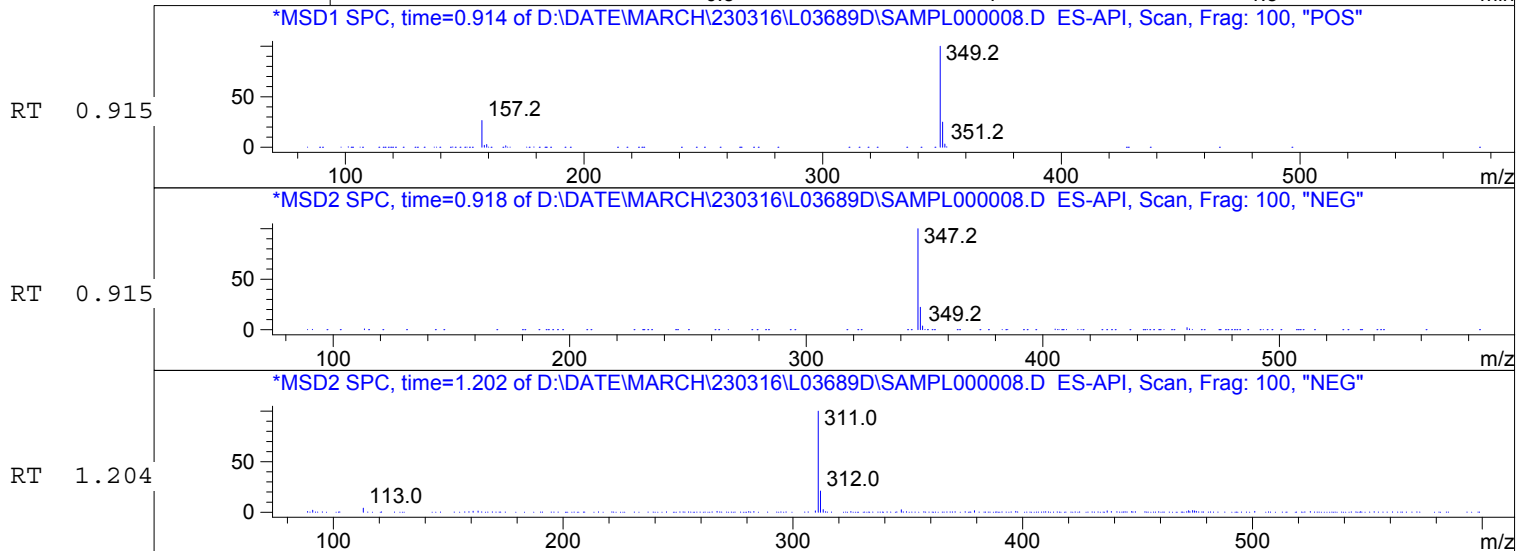

MaxPeak: 100.00%  
Ret\_Time: 0.857 min

# IBOX13688

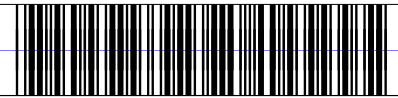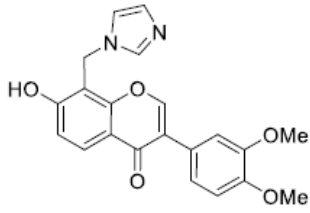

9f

Mol Wt  
Exact Mass

0

| # | Time  | Area%  |
|---|-------|--------|
| 1 | 0.857 | 100.00 |

DAD1 A, Sig=215,16 Ref=off (D:\DATE\MARCH\230316\L03689D\SAMPL000009.D)

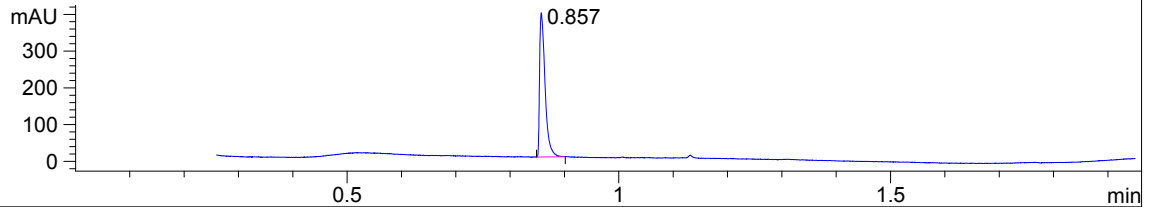

DAD1 B, Sig=254,16 Ref=off (D:\DATE\MARCH\230316\L03689D\SAMPL000009.D)

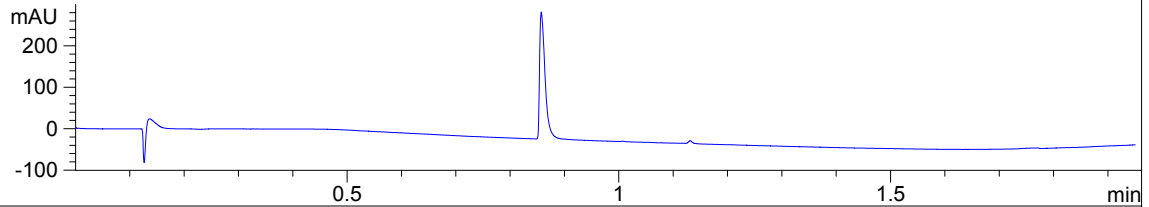

MSD1 TIC, MS File (D:\DATE\MARCH\230316\L03689D\SAMPL000009.D) ES-API, Scan, Frag: 100, "POS"

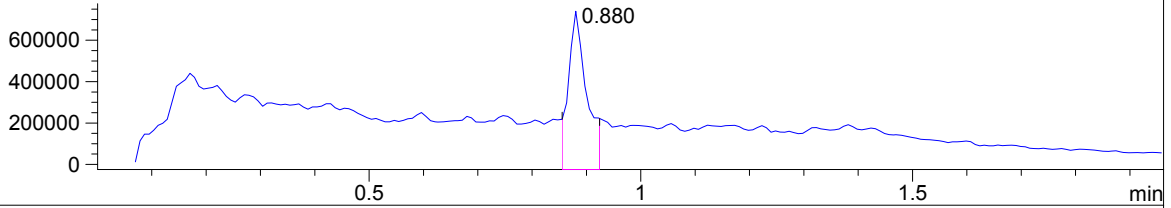

MSD2 TIC, MS File (D:\DATE\MARCH\230316\L03689D\SAMPL000009.D) ES-API, Scan, Frag: 100, "NEG"

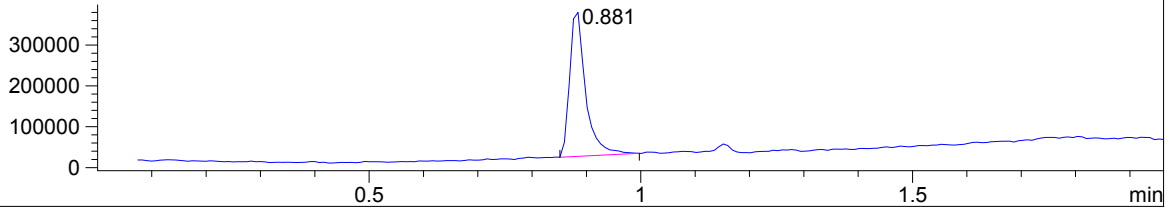

ADC1 A, ADC1 (D:\DATE\MARCH\230316\L03689D\SAMPL000009.D)

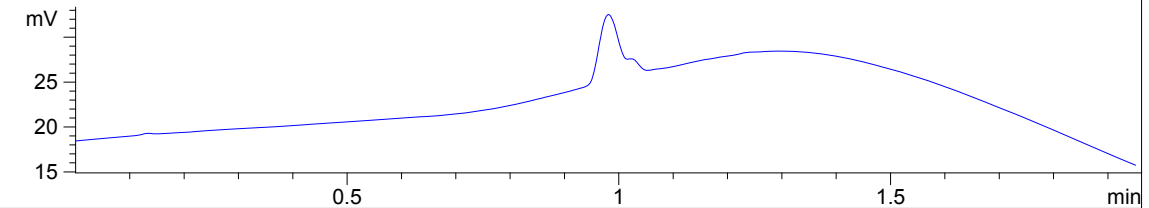

\*MSD1 SPC, time=0.880 of D:\DATE\MARCH\230316\L03689D\SAMPL000009.D ES-API, Scan, Frag: 100, "POS"

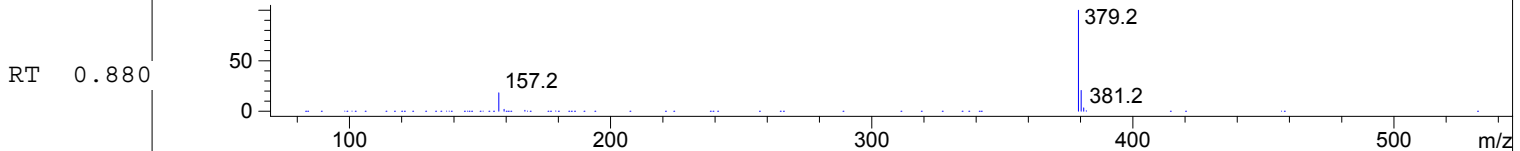

\*MSD2 SPC, time=0.885 of D:\DATE\MARCH\230316\L03689D\SAMPL000009.D ES-API, Scan, Frag: 100, "NEG"

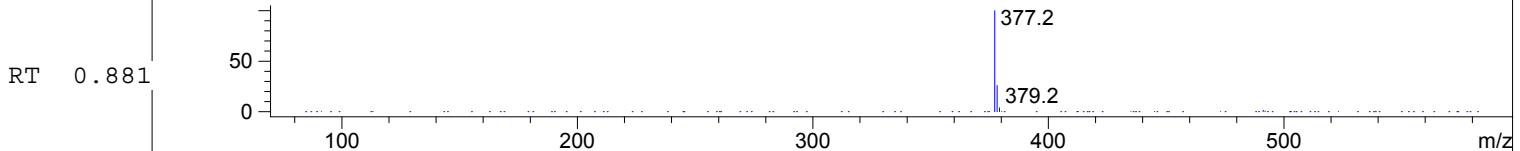



# CLQ377550

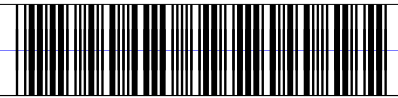

MaxPeak: 100.00%  
Ret\_Time: 0.731 min

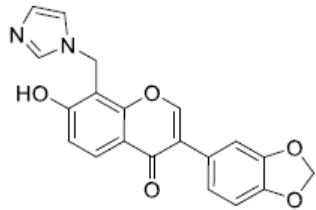

9g

Mol Wt 0  
Exact Mass

| # | Time  | Area%  |
|---|-------|--------|
| 1 | 0.731 | 100.00 |

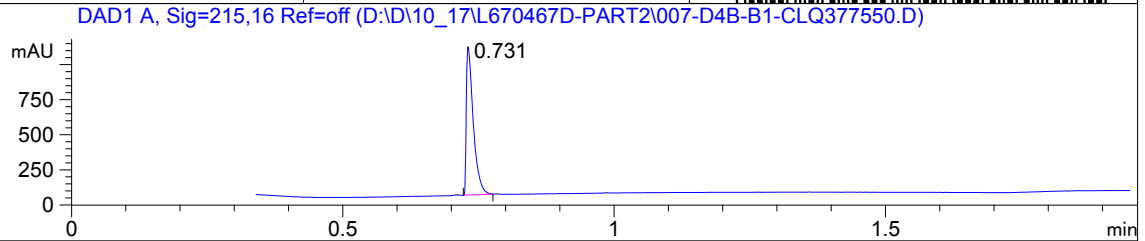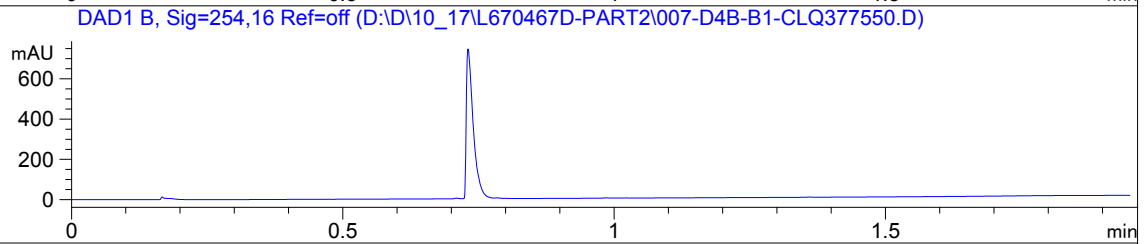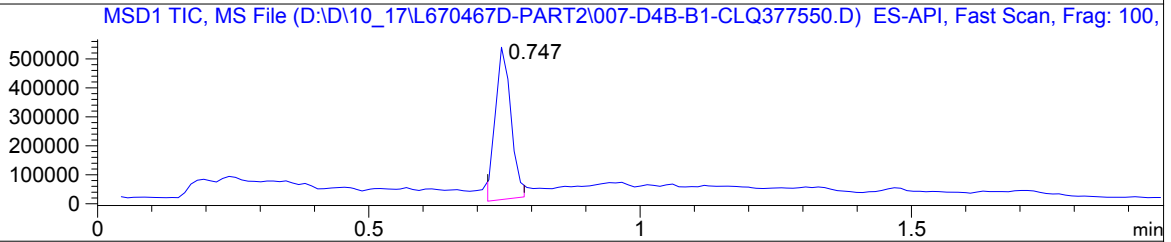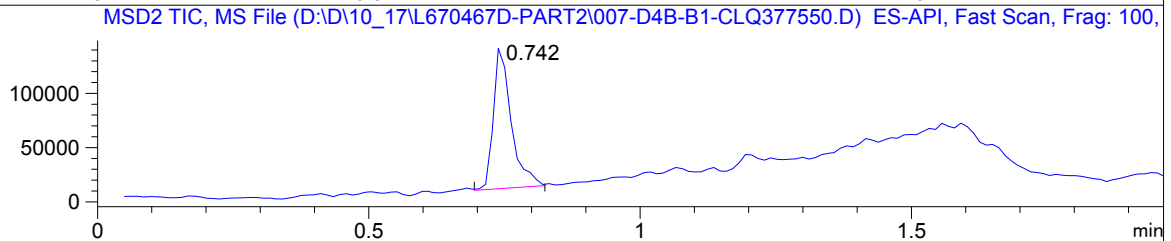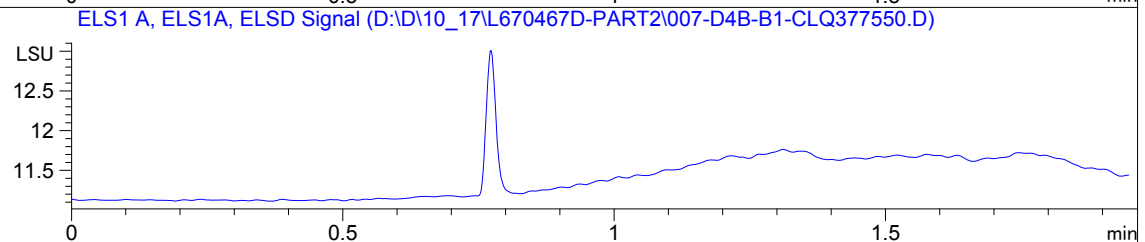

RT 0.747

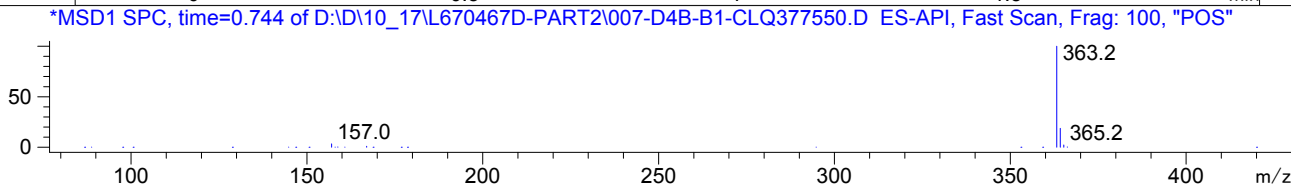

RT 0.742

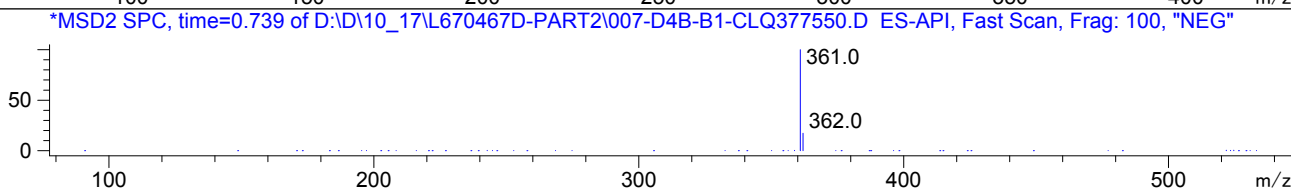

MaxPeak: 100.00%  
Ret\_Time: 0.969 min

# IBOX13644

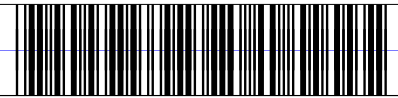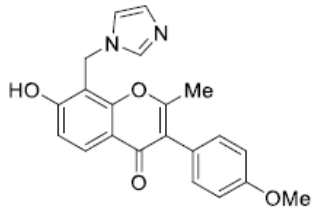

9h

Mol Wt  
Exact Mass

0

| # | Time  | Area%  |
|---|-------|--------|
| 1 | 0.969 | 100.00 |

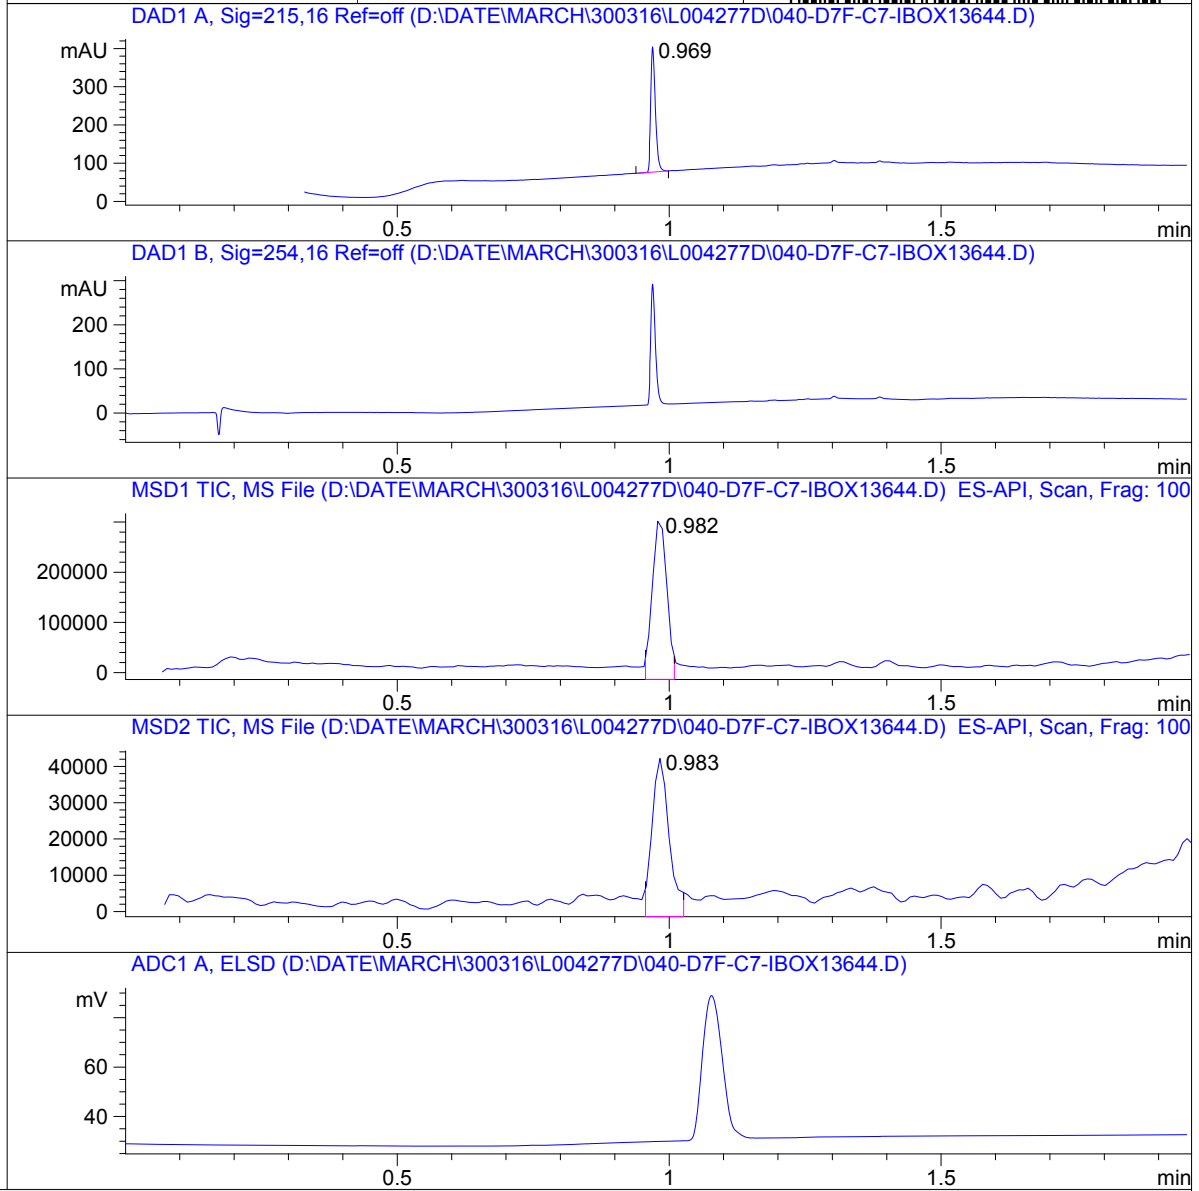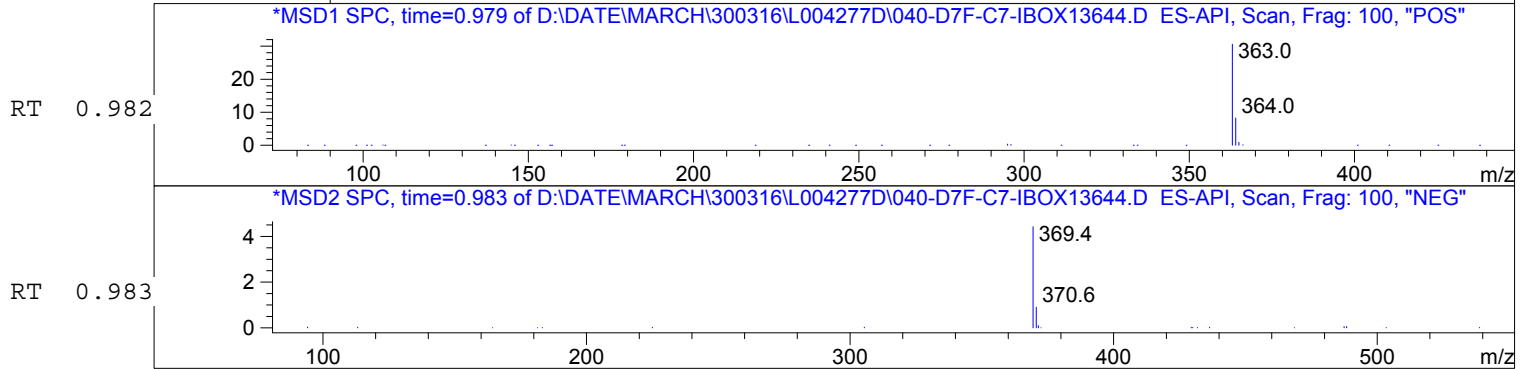

# CLQ362993

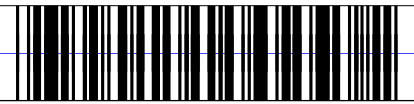

MaxPeak: 100.00%  
Ret\_Time: 0.898 min

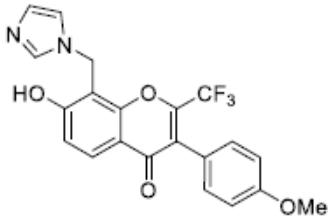

9i

Mol Wt

Exact Mass

| # | Time  | Area%  |
|---|-------|--------|
| 1 | 0.898 | 100.00 |

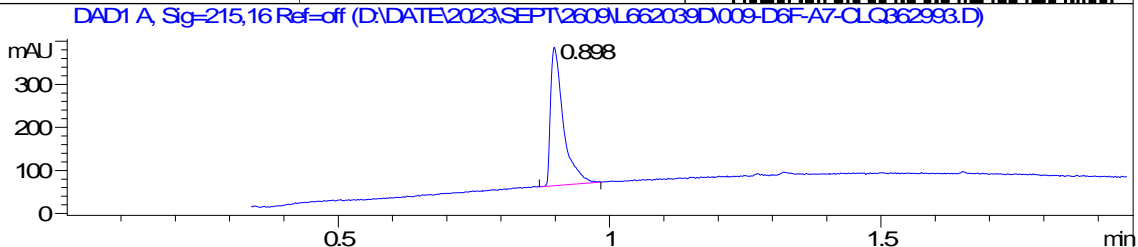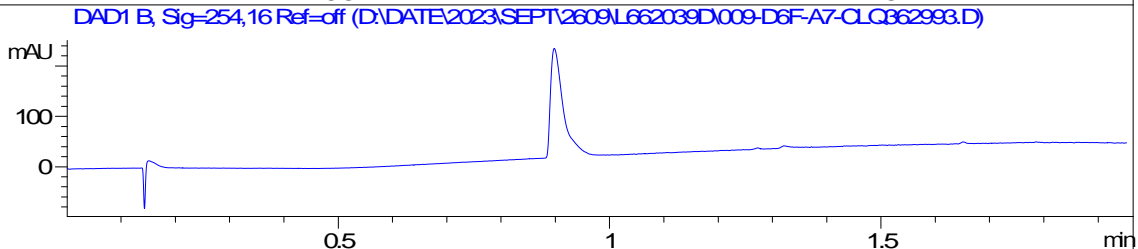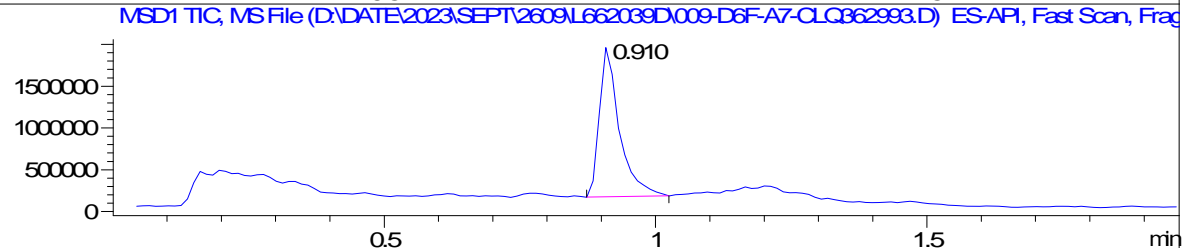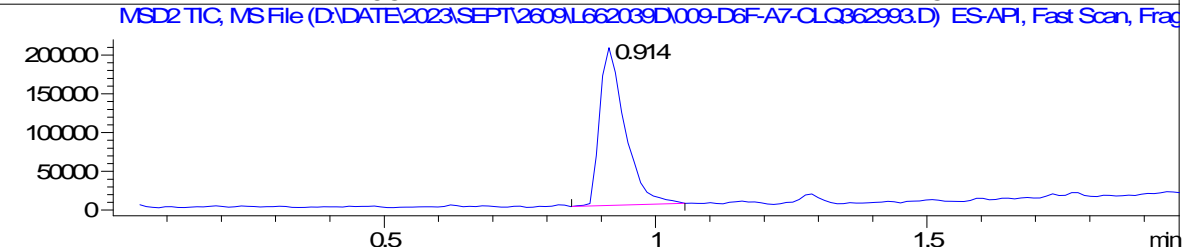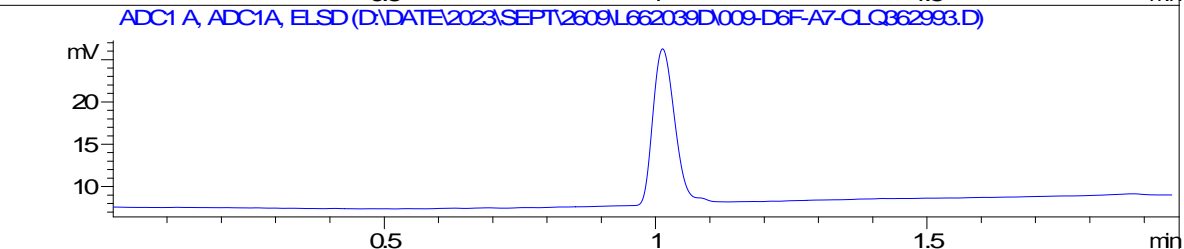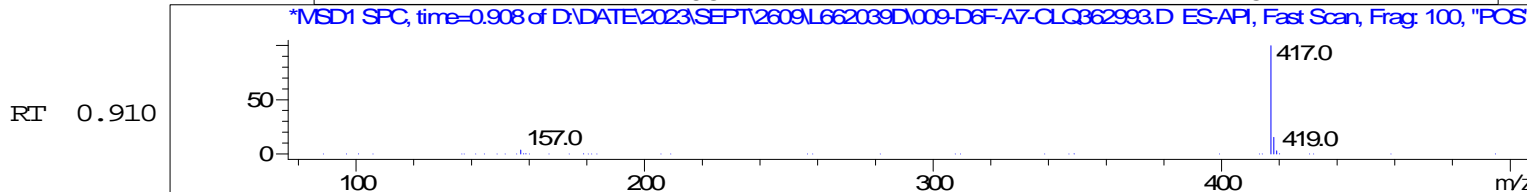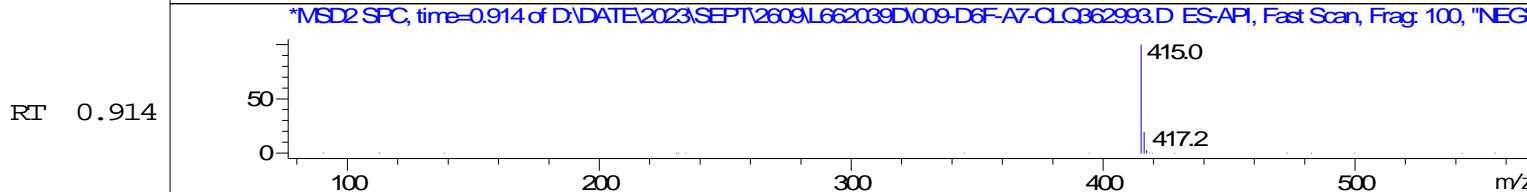

# CLQ362997

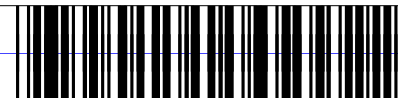

MaxPeak: 100.00%  
Ret\_Time: 0.934 min

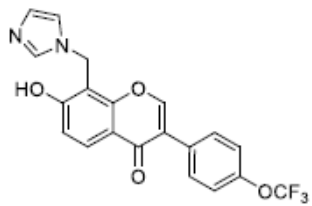

9j

Mol Wt

Exact Mass

| # | Time  | Area%  |
|---|-------|--------|
| 1 | 0.934 | 100.00 |

0

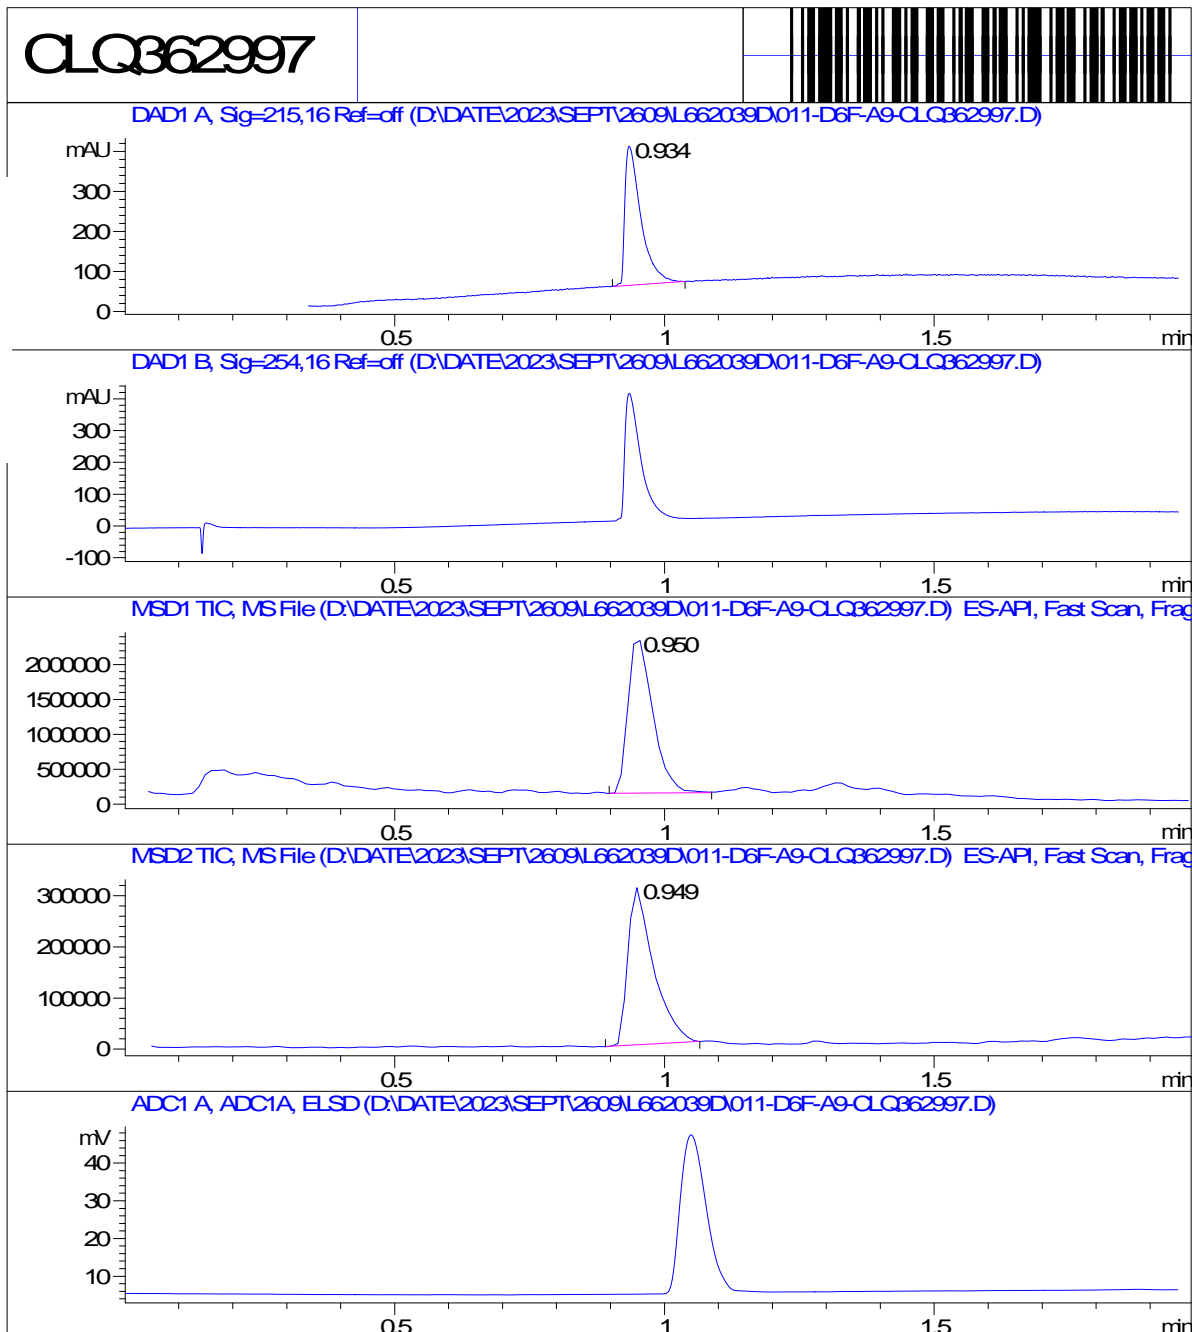

RT 0.950

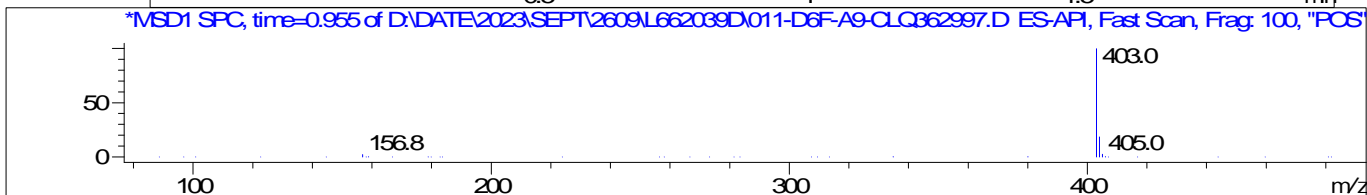

RT 0.949

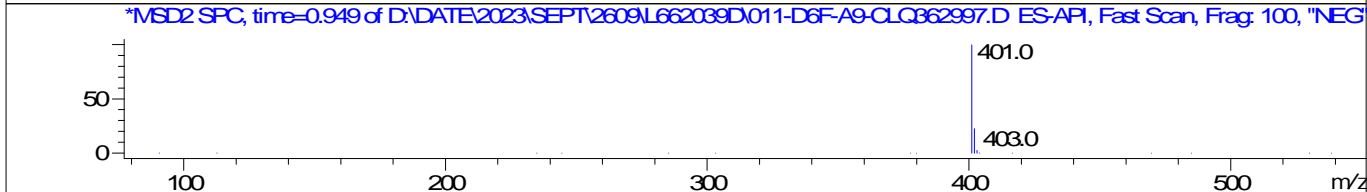

MaxPeak: 100.00%  
Ret\_Time: 0.847 min

# IBOX27391

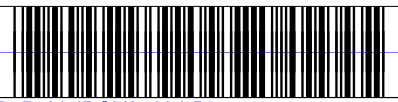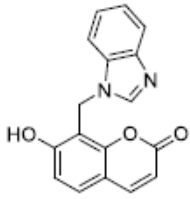

**10a**

**Mol Wt**  
**Exact Mass**

| # | Time  | Area%  |
|---|-------|--------|
| 1 | 0.847 | 100.00 |

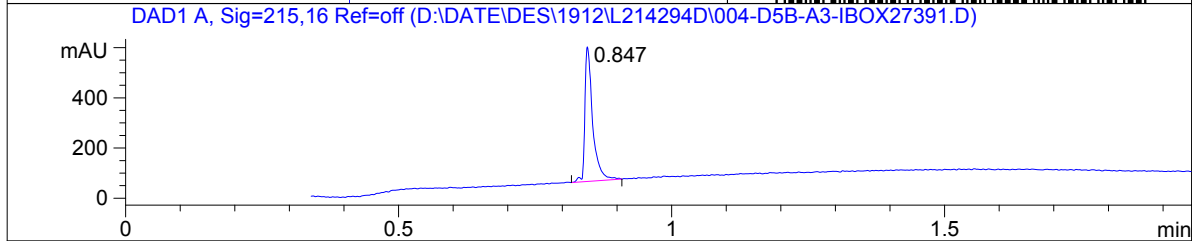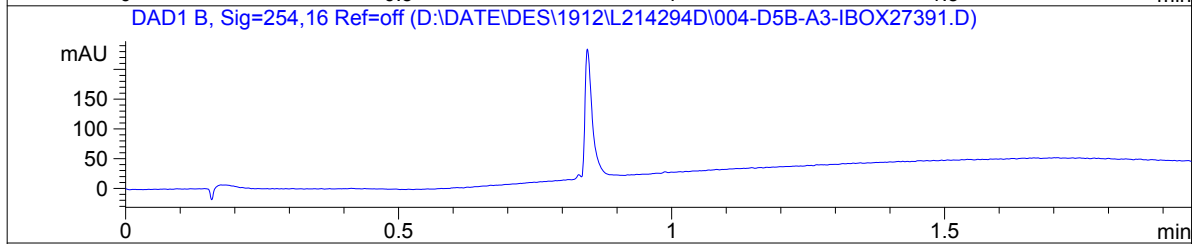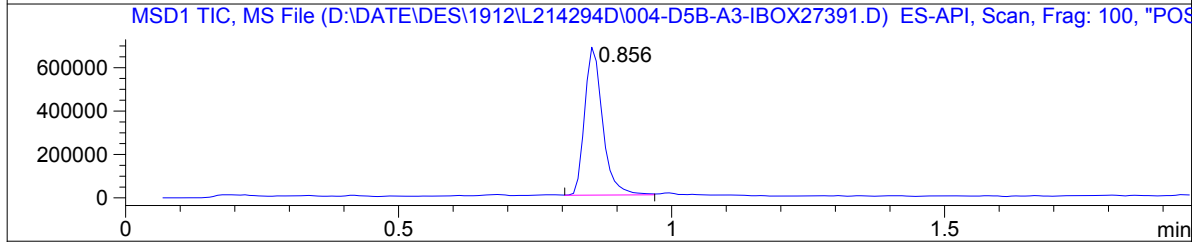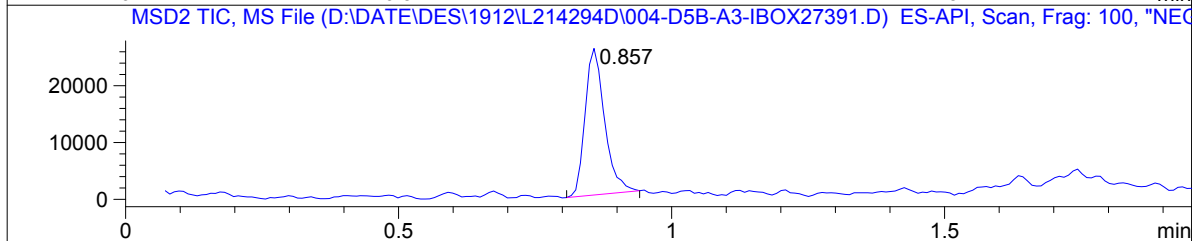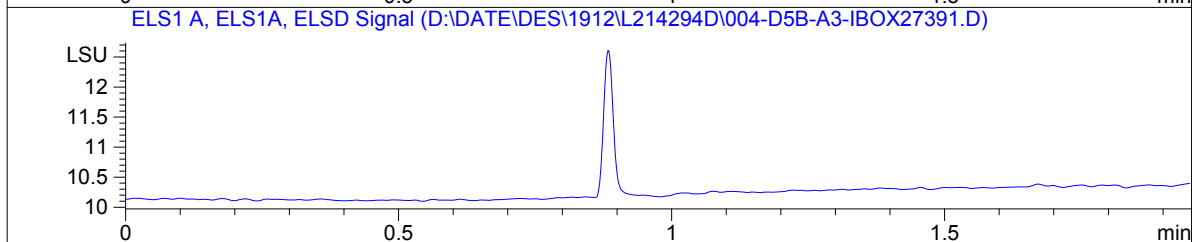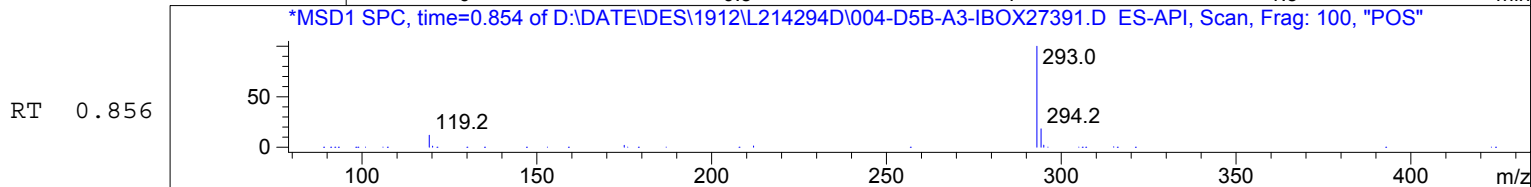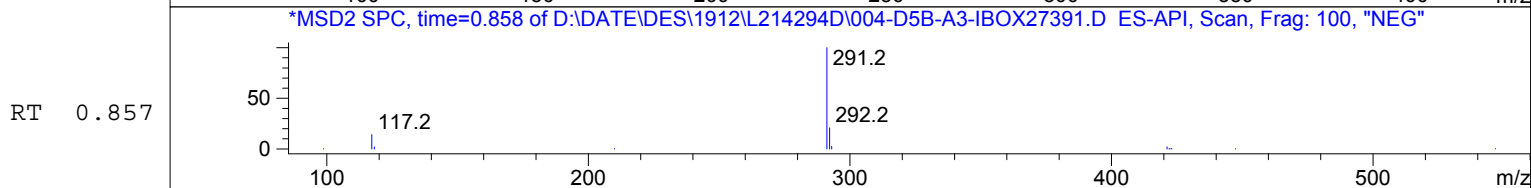

MaxPeak: 100.00%  
Ret\_Time: 1.002 min

# IBOX27197

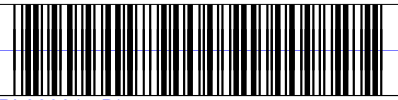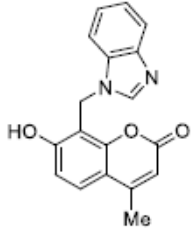

**10b**

**Mol Wt**  
**Exact Mass**

| # | Time  | Area%  |
|---|-------|--------|
| 1 | 1.002 | 100.00 |

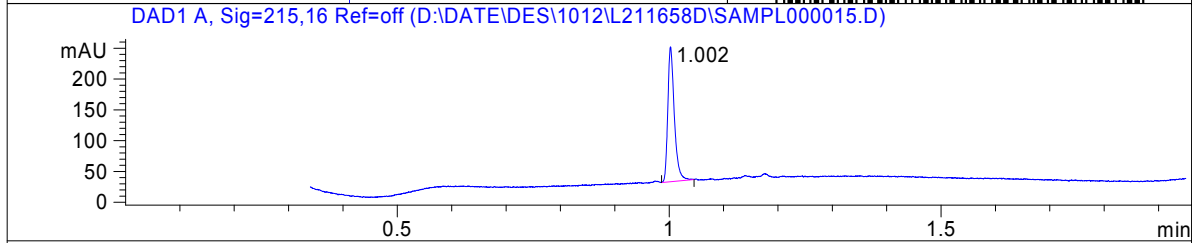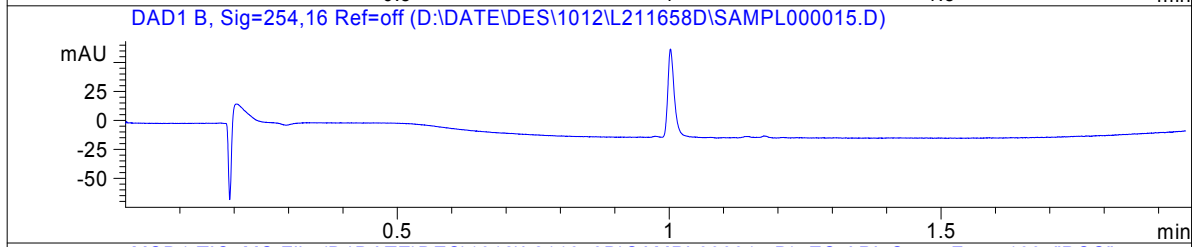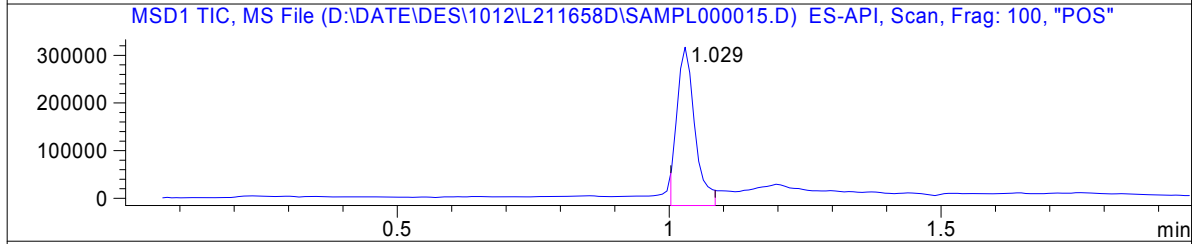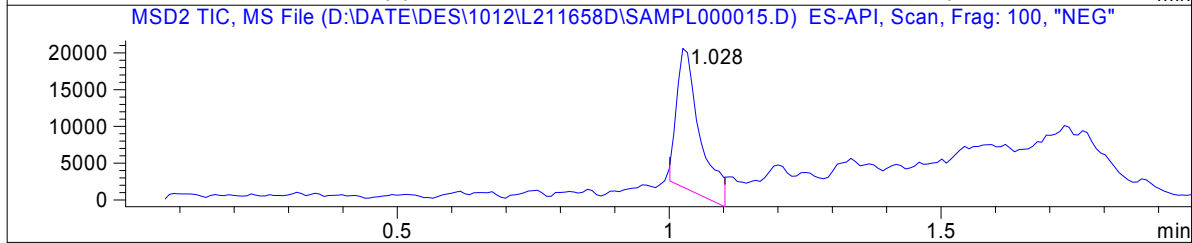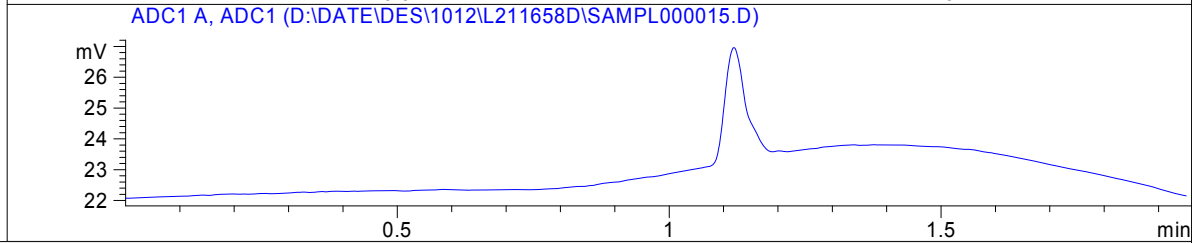

RT 1.029

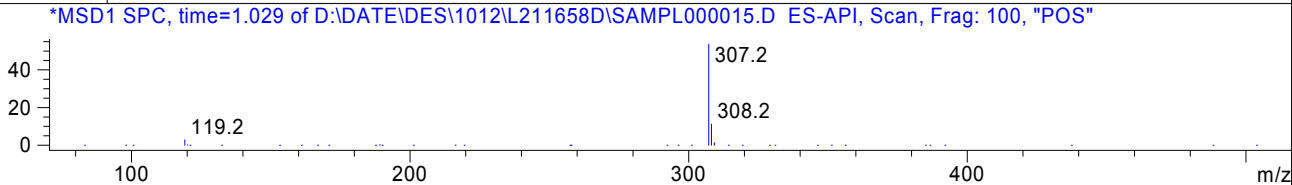

RT 1.028

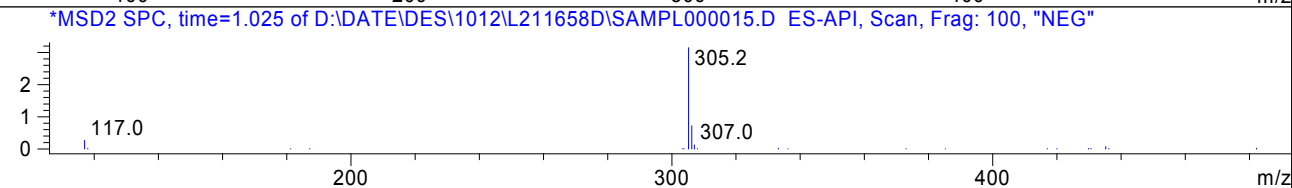

# CLQ362992

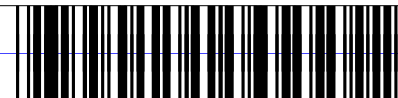

MaxPeak: 100.00%  
Ret\_Time: 0.787 min

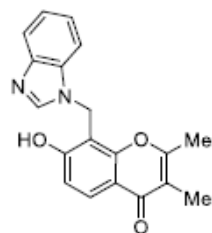

10c

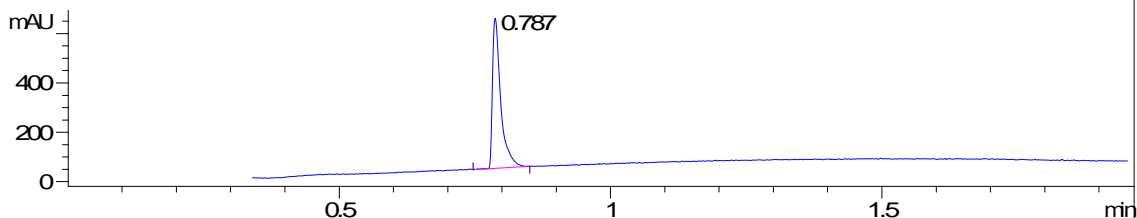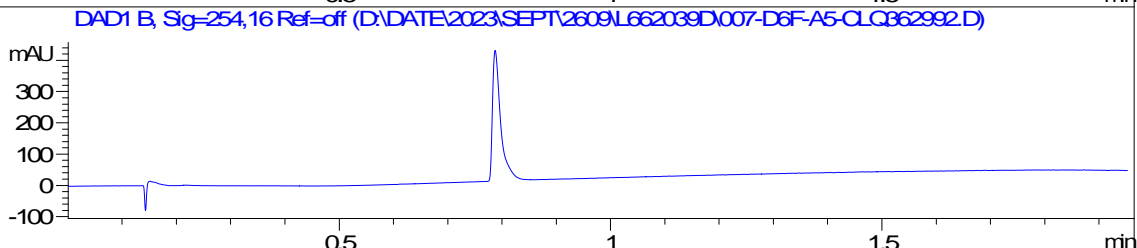

0

Mol Wt  
Exact Mass

| # | Time  | Area%  |
|---|-------|--------|
| 1 | 0.787 | 100.00 |

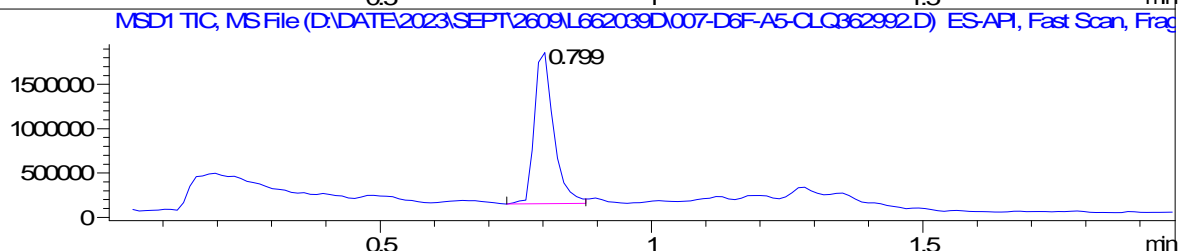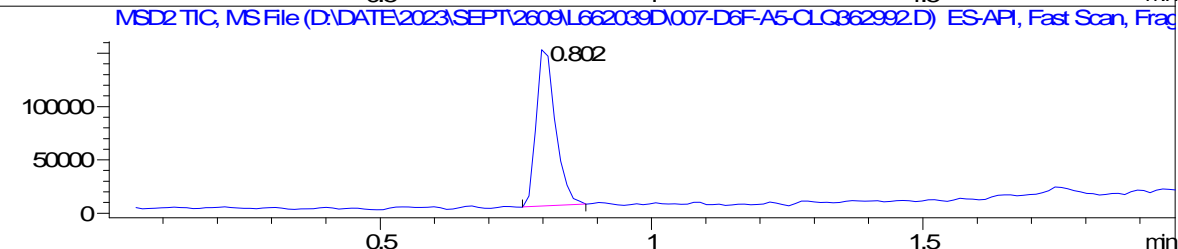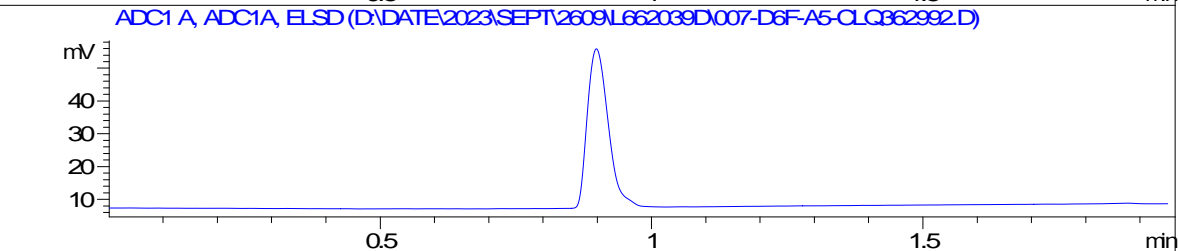

RT 0.799

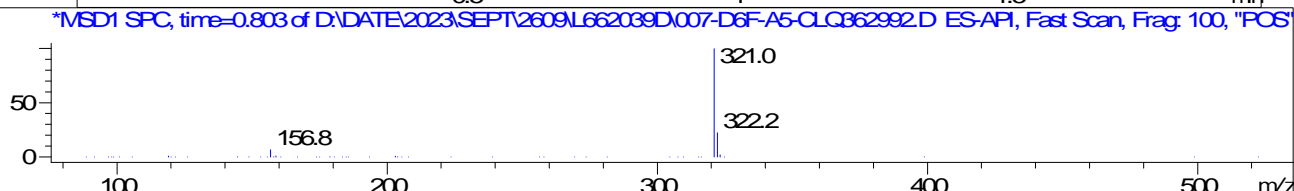

RT 0.802

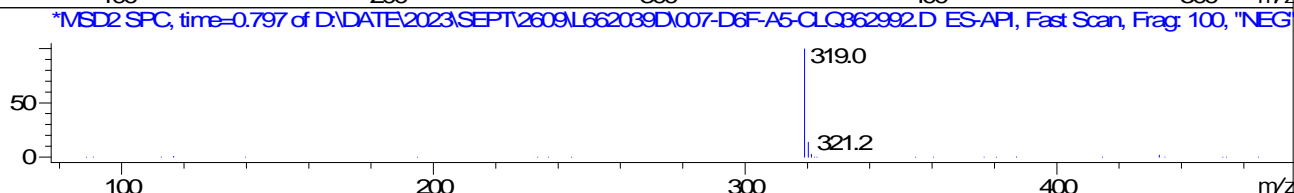

MaxPeak: 100.00%  
Ret\_Time: 1.019 min

# IBOX13686

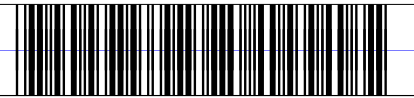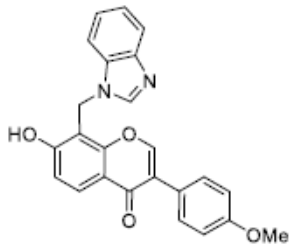

**10d**

**Mol Wt**  
**Exact Mass**

**0**

| # | Time  | Area%  |
|---|-------|--------|
| 1 | 1.019 | 100.00 |

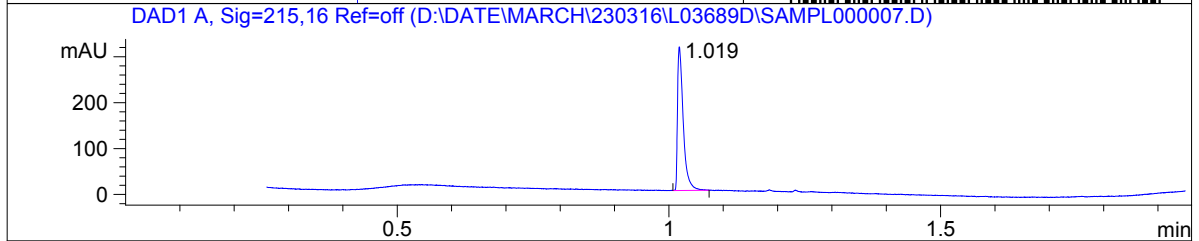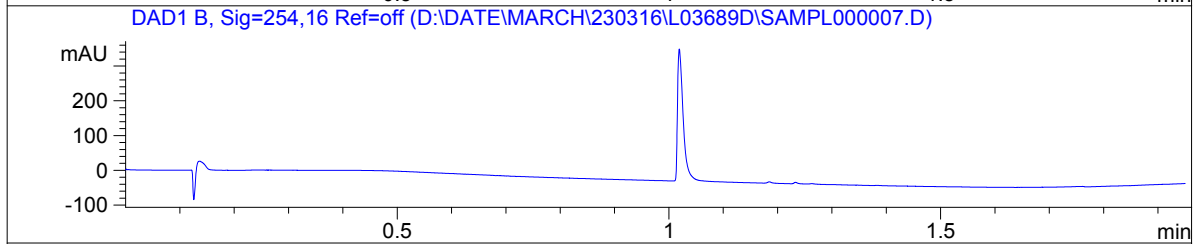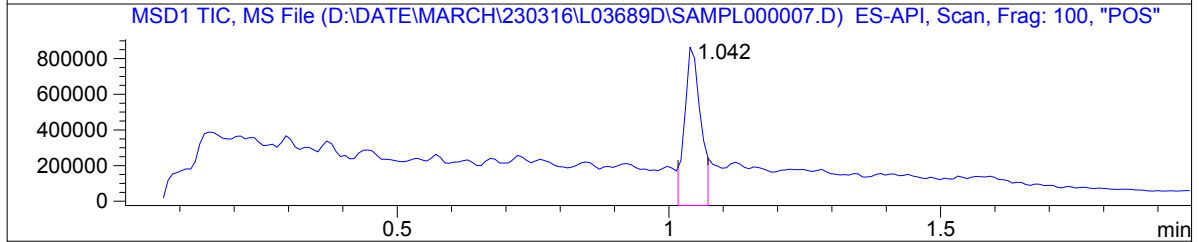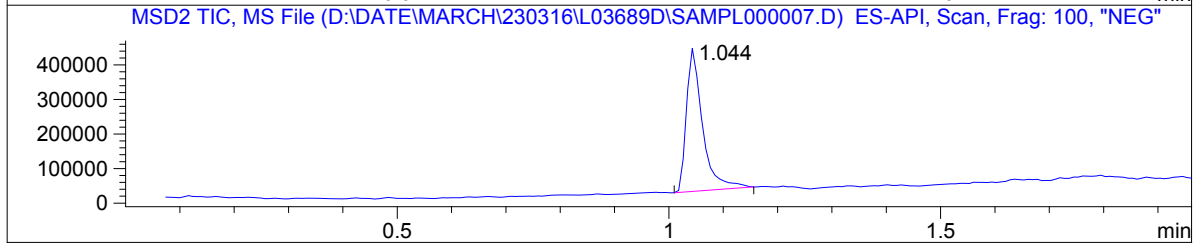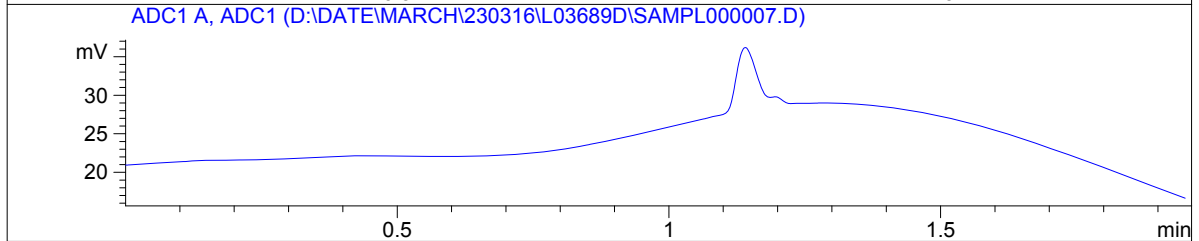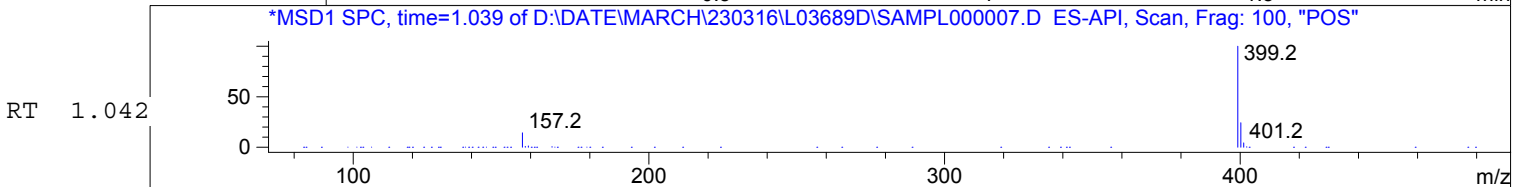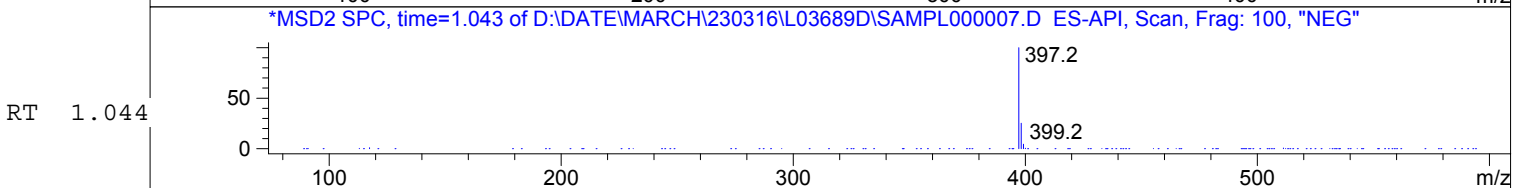



MaxPeak: 98.09%  
Ret\_Time: 0.978 min

# IBOX13684

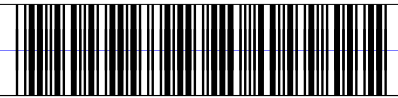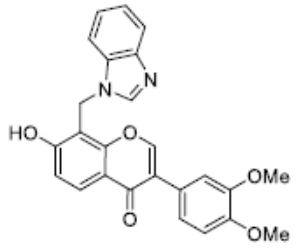

10e

Mol Wt  
Exact Mass

0

# Time Area%

| # | Time  | Area% |
|---|-------|-------|
| 1 | 0.978 | 98.09 |
| 2 | 1.129 | 1.91  |

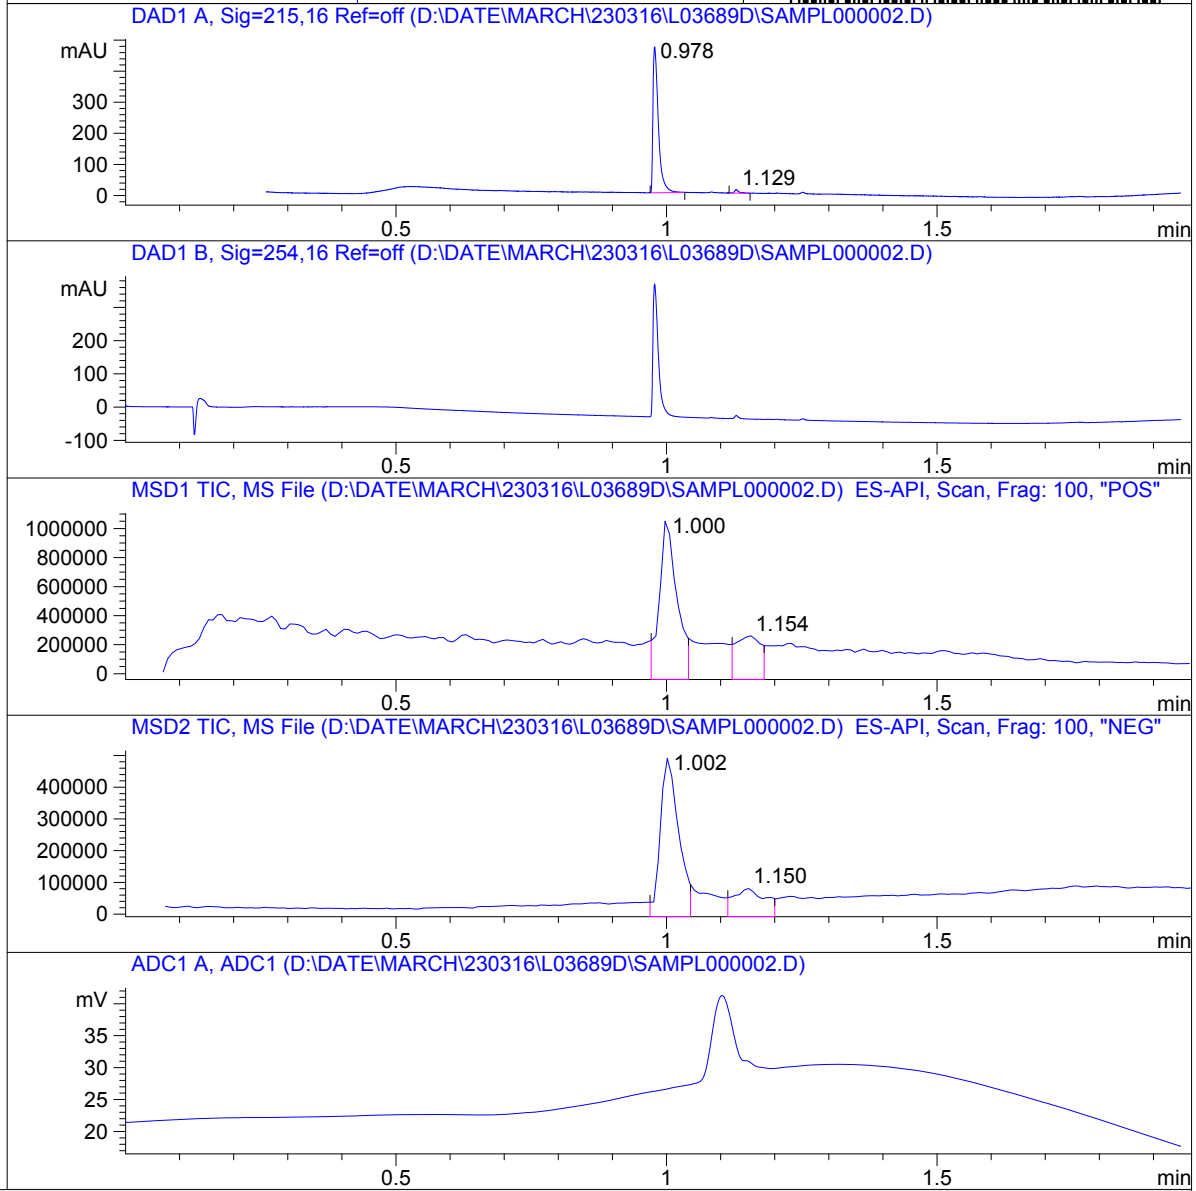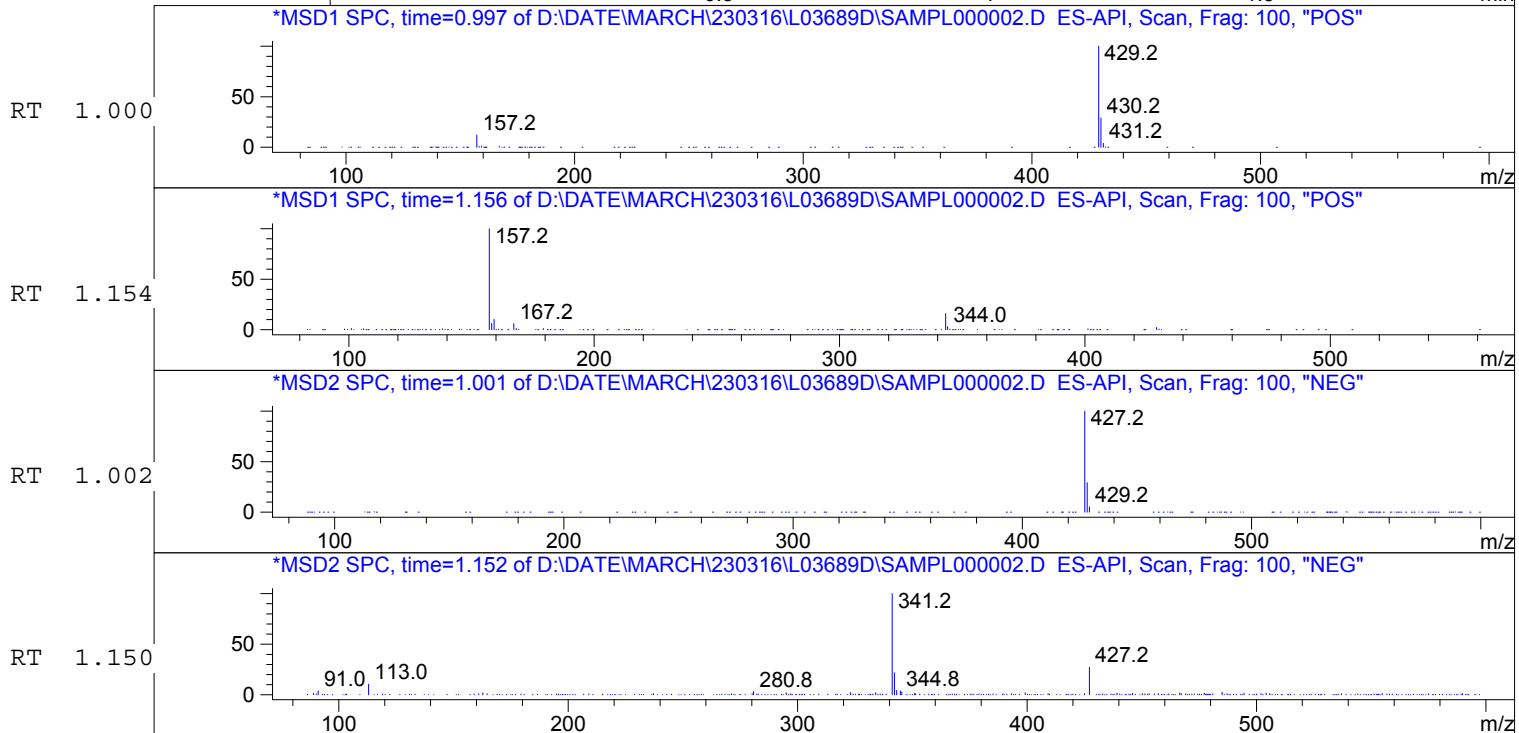

S169

MaxPeak: 96.54%  
Ret\_Time: 1.014 min

# IBOX13849

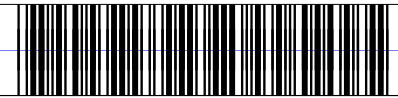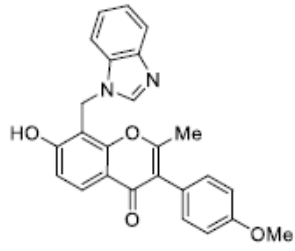

**10f**

**Mol Wt** 0  
**Exact Mass**

| # | Time  | Area% |
|---|-------|-------|
| 1 | 1.014 | 96.54 |
| 2 | 1.230 | 3.46  |

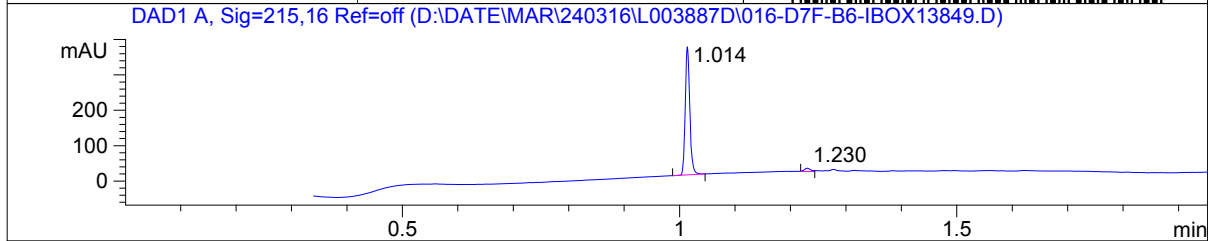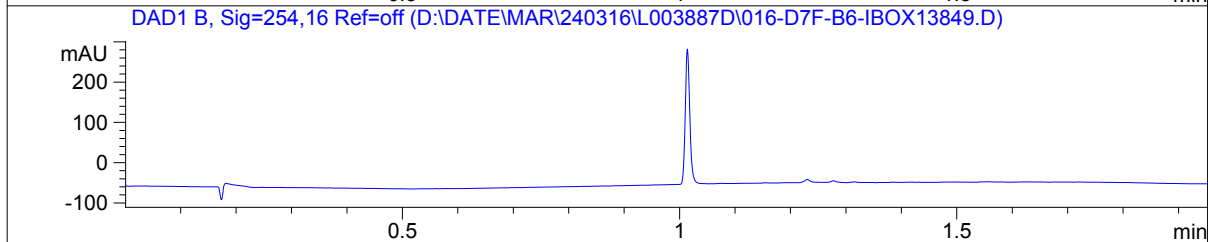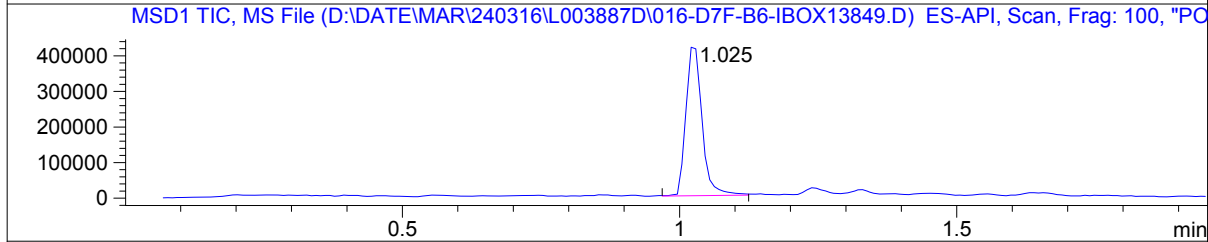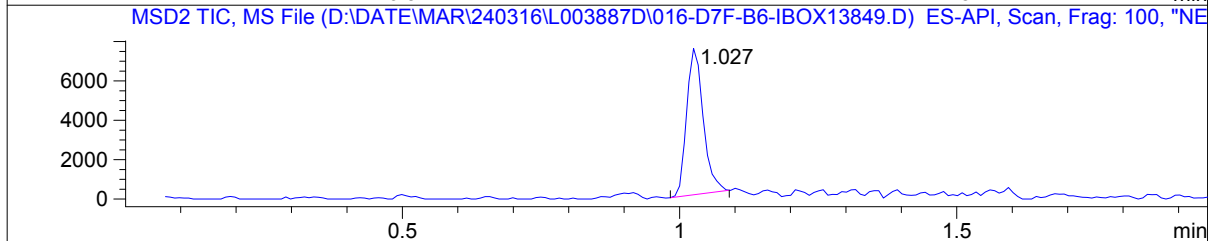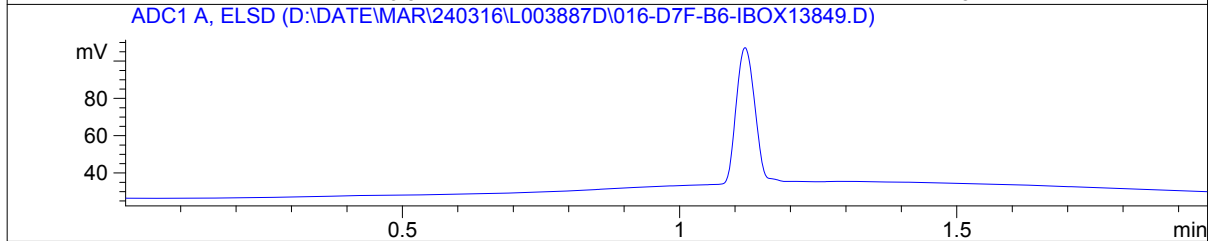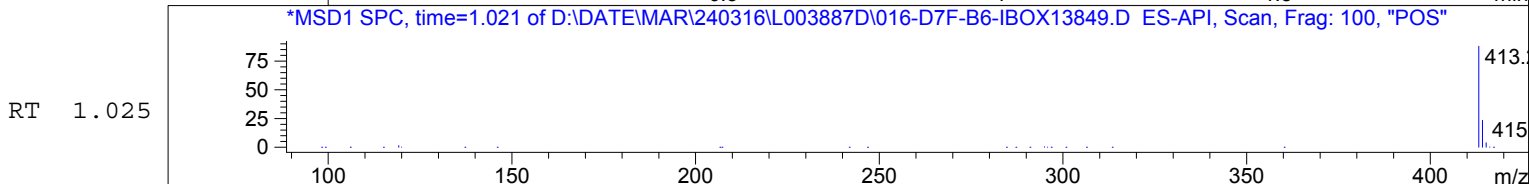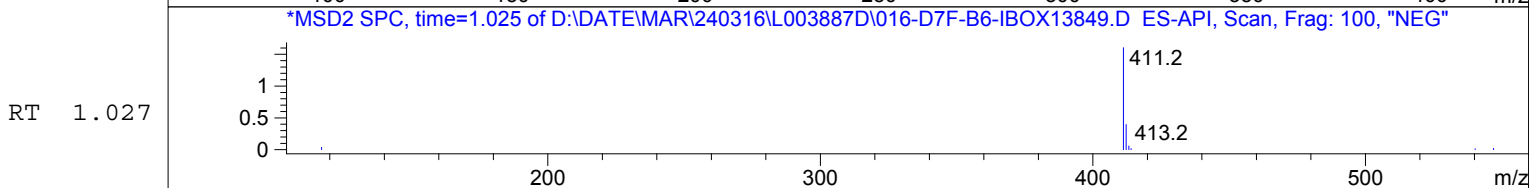

MaxPeak: 100.00%  
Ret\_Time: 1.186 min

# CLQ377163

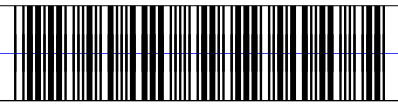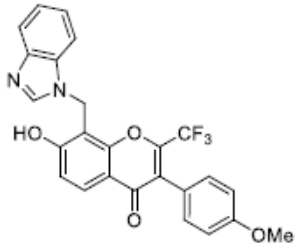

10g

Mol Wt 0  
Exact Mass

| # | Time  | Area%  |
|---|-------|--------|
| 1 | 1.186 | 100.00 |

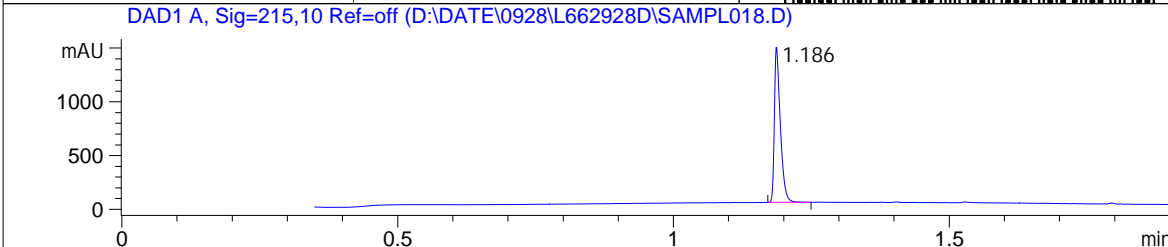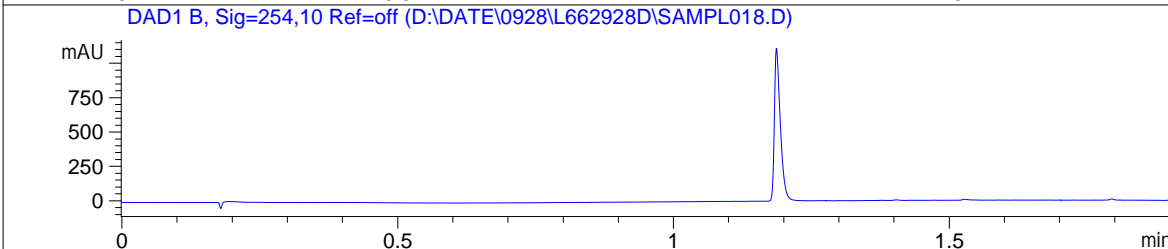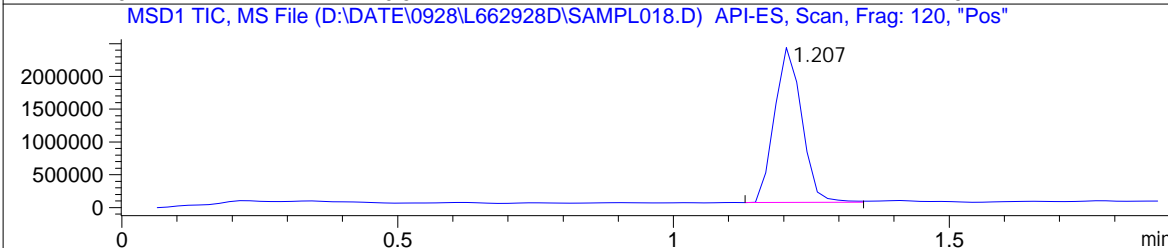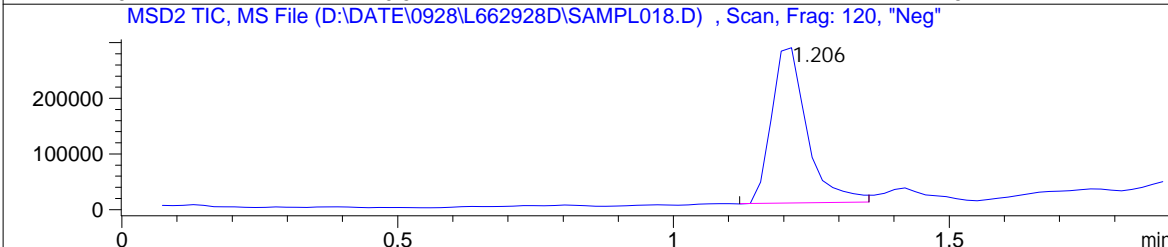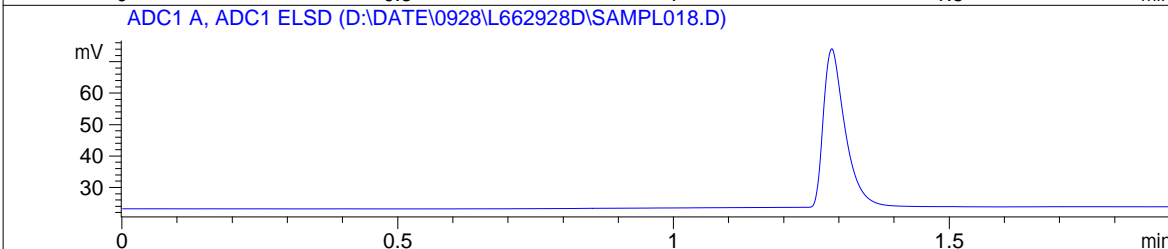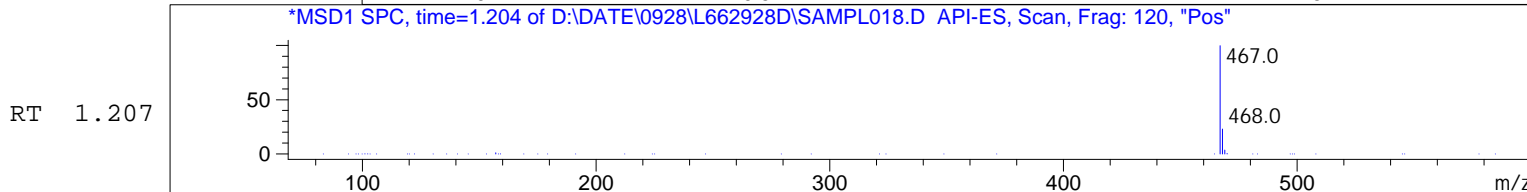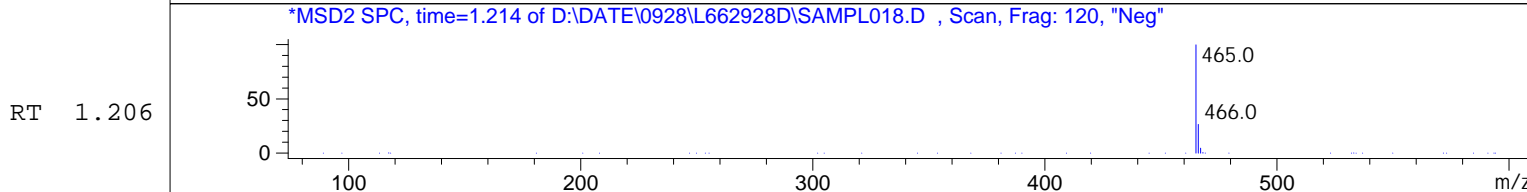

MaxPeak: 100.00%  
Ret\_Time: 1.153 min

CLQ377170

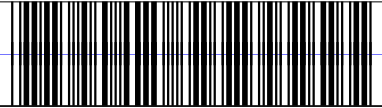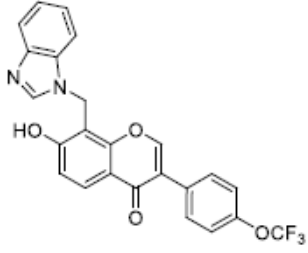

10h

Mol Wt  
Exact Mass

| # | Time  | Area%  |
|---|-------|--------|
| 1 | 1.153 | 100.00 |

0

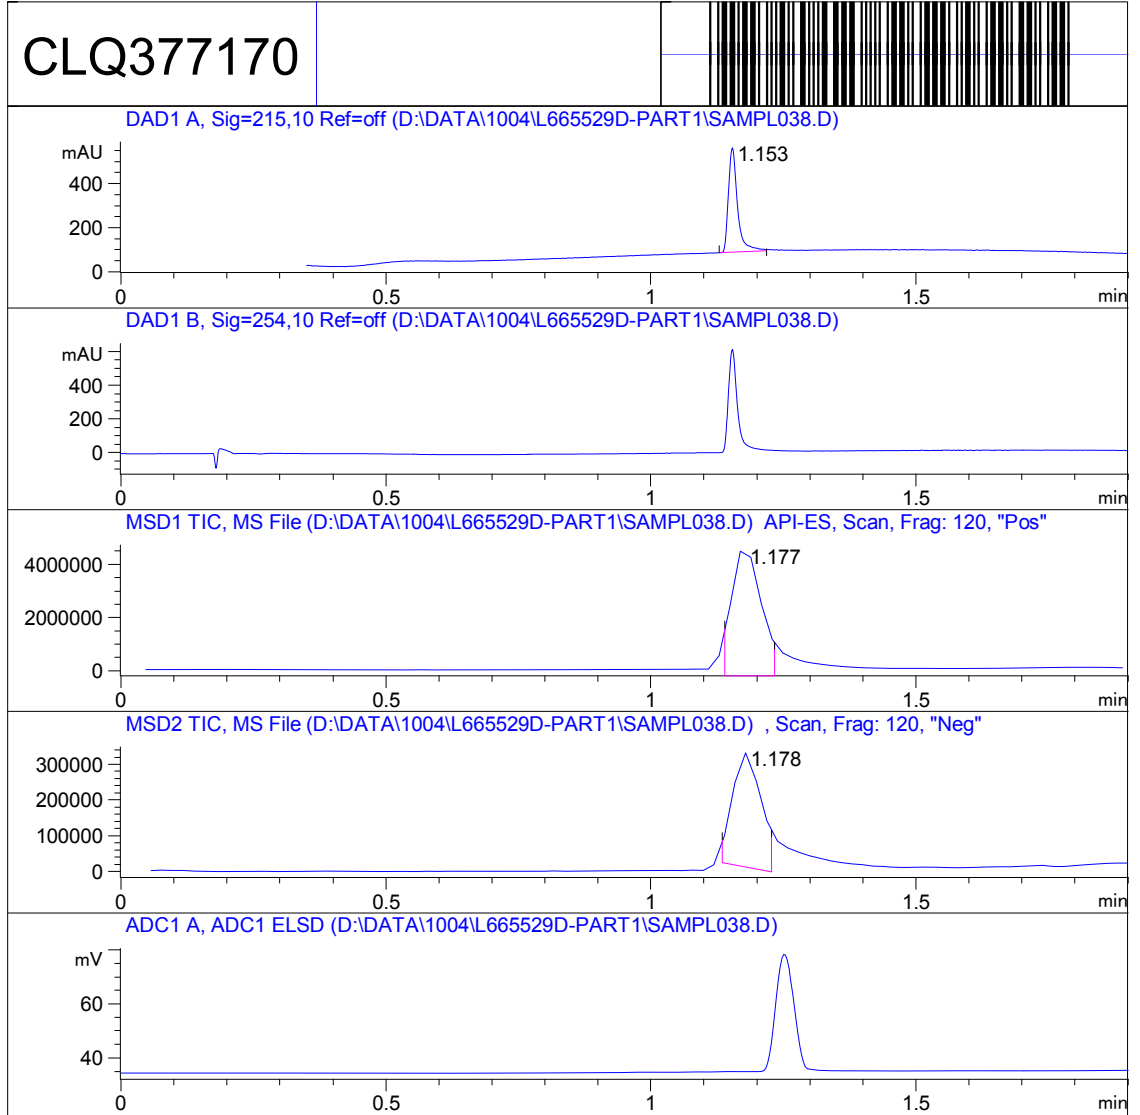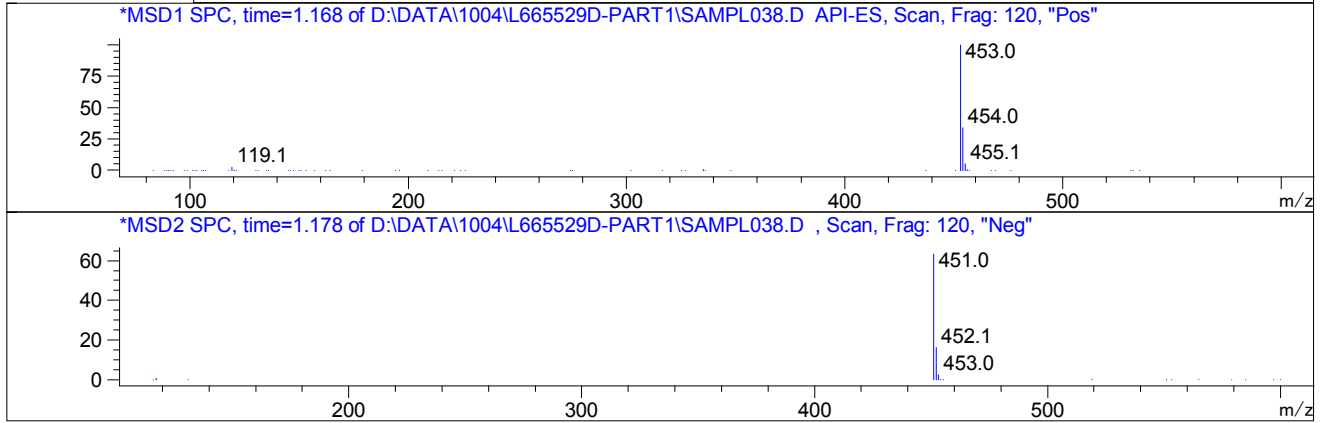

# IBOX27390

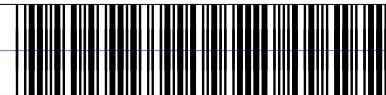

MaxPeak: 100.00%  
Ret\_Time: 0.721 min

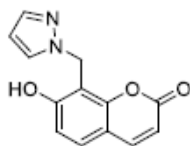

11a

Mol Wt  
Exact Mass

| # | Time  | Area%  |
|---|-------|--------|
| 1 | 0.721 | 100.00 |

0

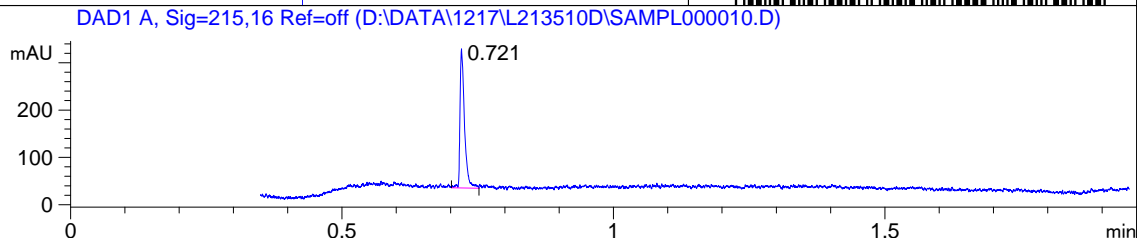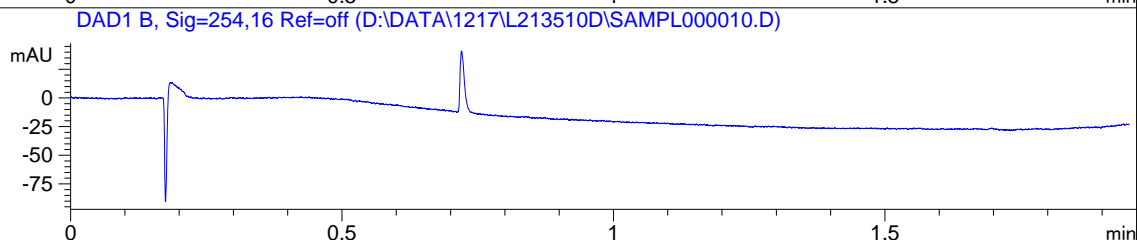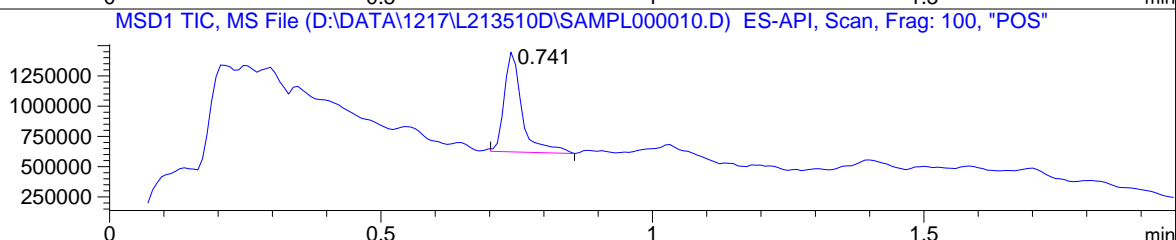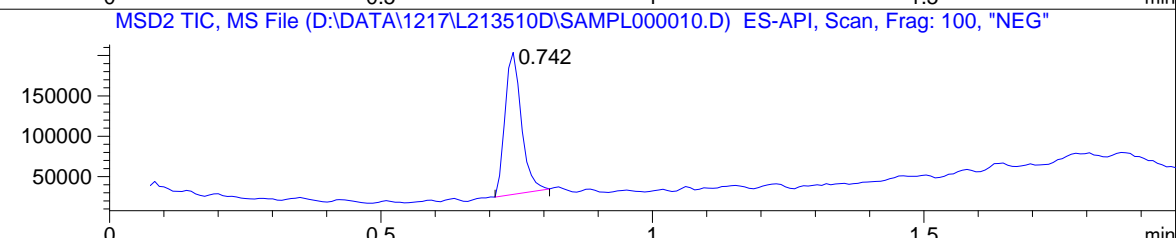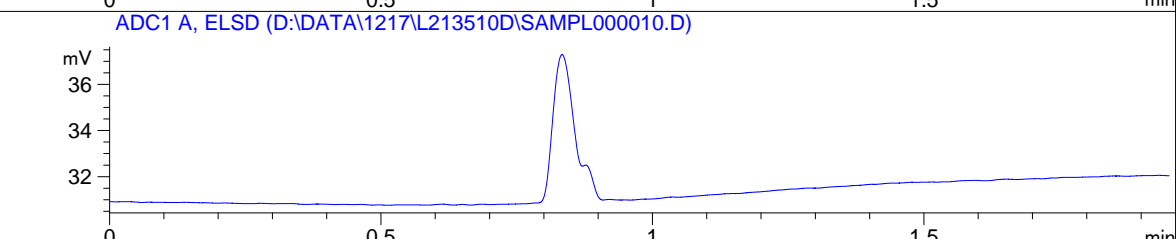

RT 0.741

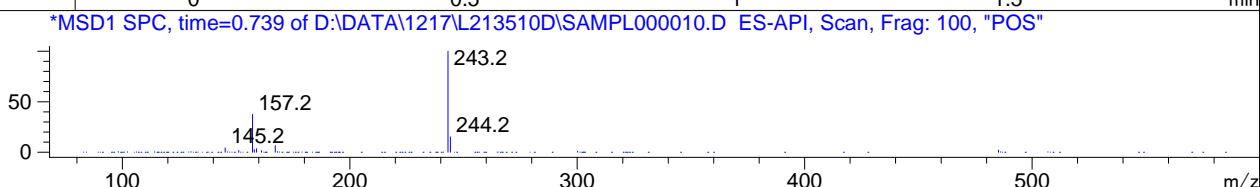

RT 0.742

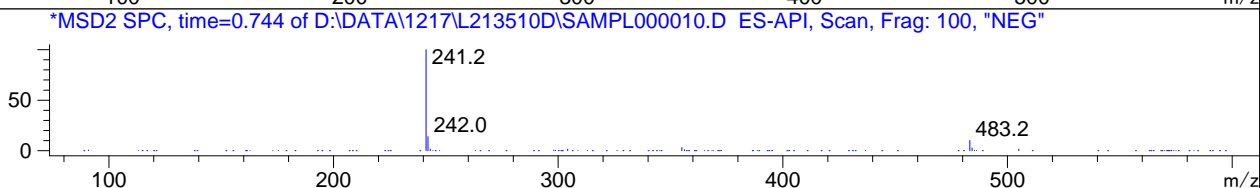

MaxPeak: 86.52%  
Ret\_Time: 1.090 min

# IBOX13615

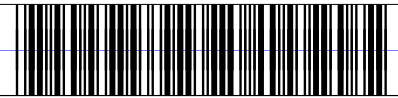

11b

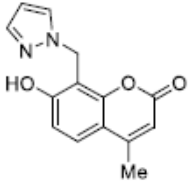

Mol Wt  
Exact Mass

0

# Time Area%

| # | Time  | Area% |
|---|-------|-------|
| 1 | 1.029 | 2.32  |
| 2 | 1.090 | 86.52 |
| 3 | 1.129 | 3.03  |
| 4 | 1.297 | 4.85  |
| 5 | 1.421 | 3.29  |

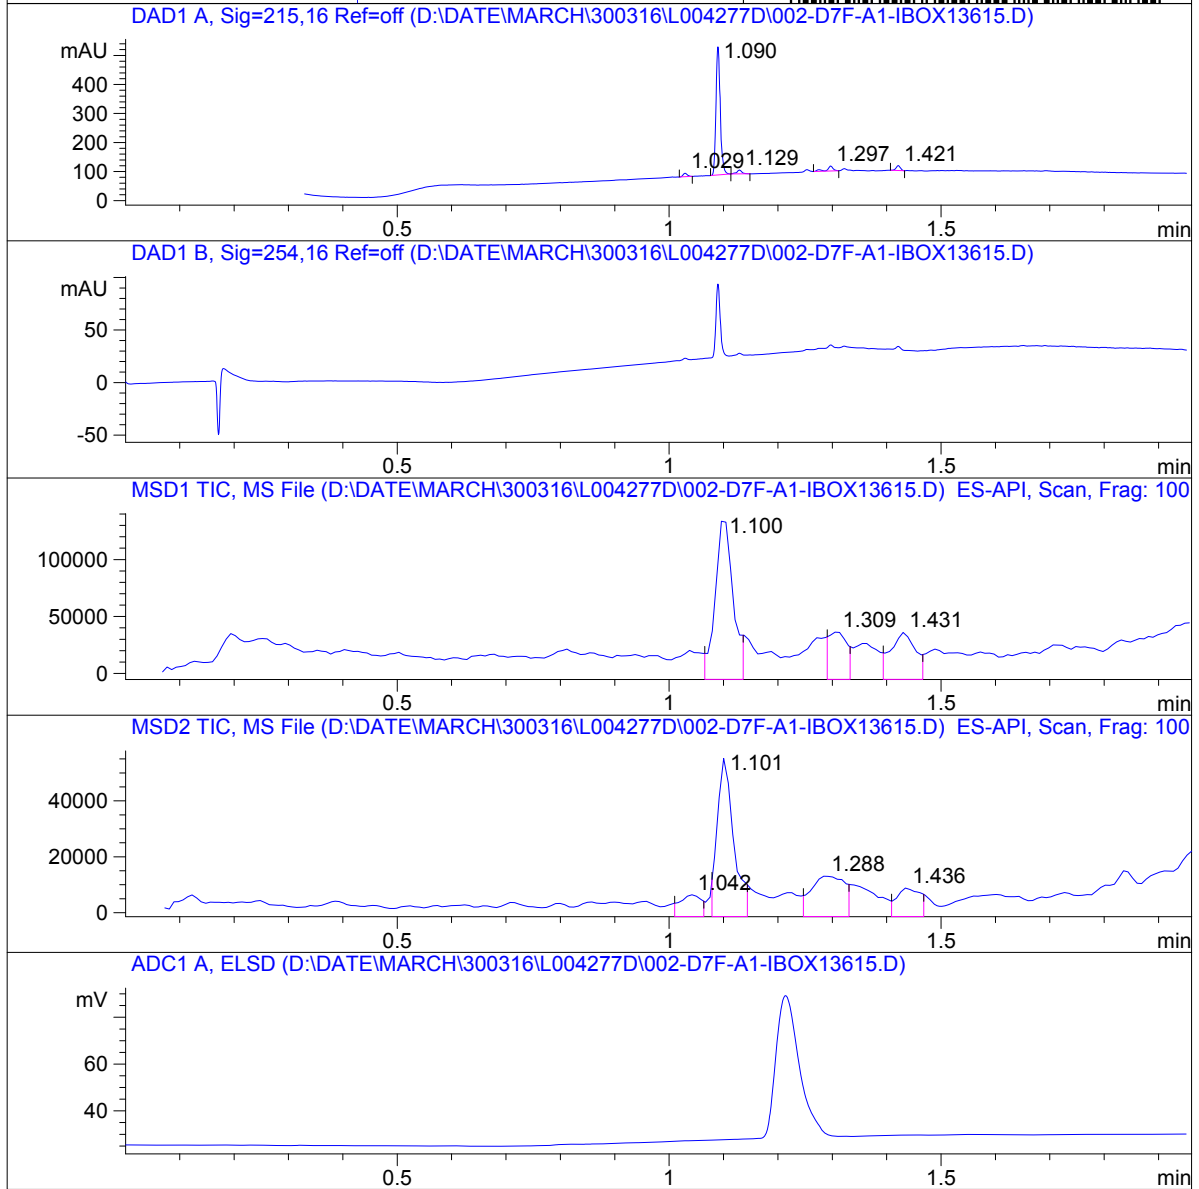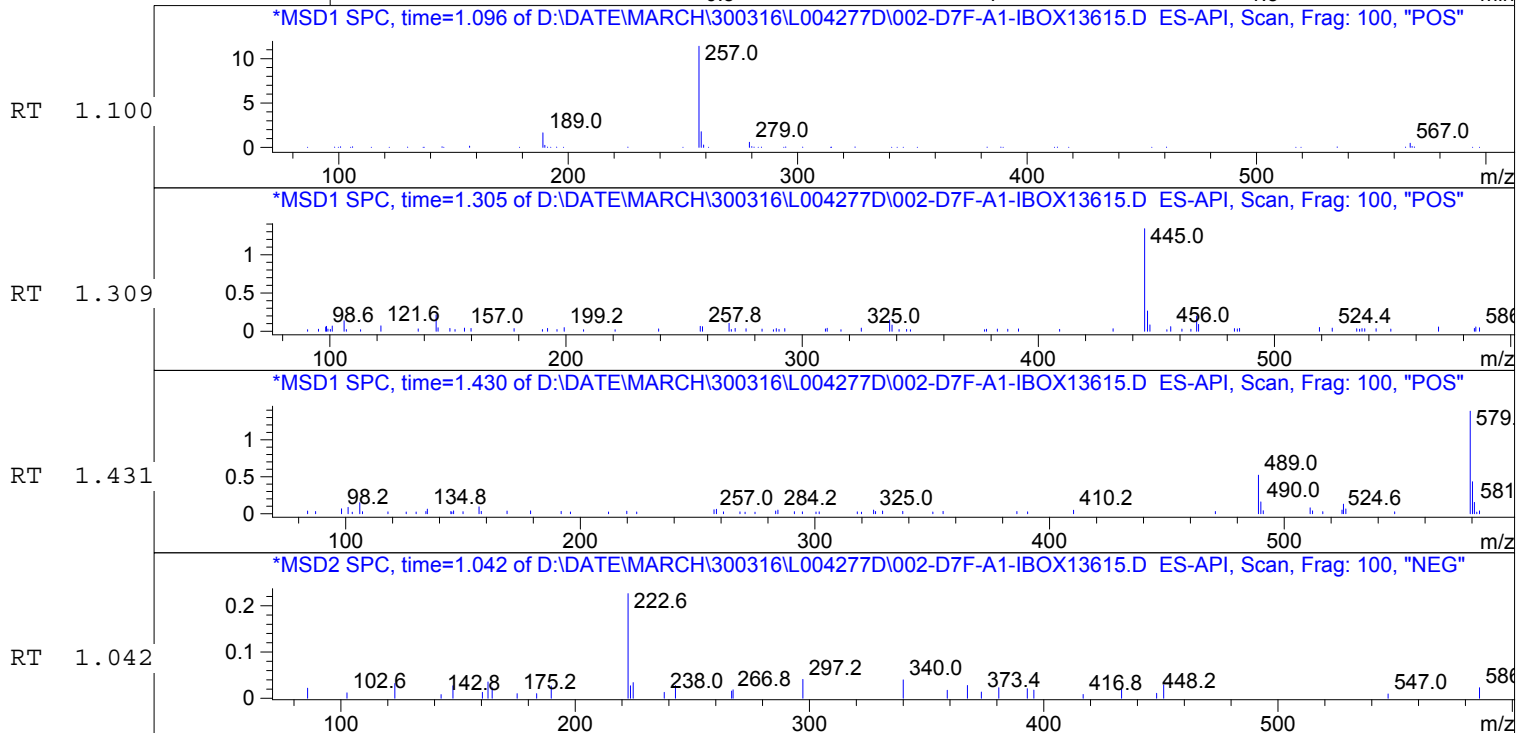

# CLQ362995

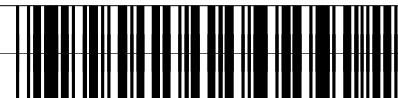

MaxPeak: 100.00%  
Ret\_Time: 0.968 min

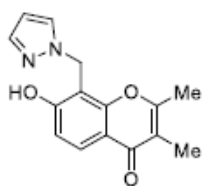

11c

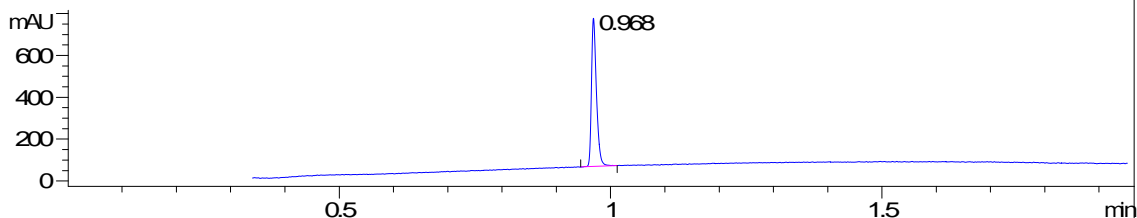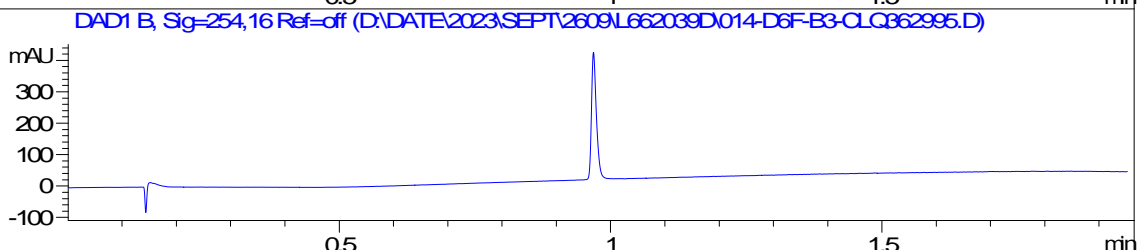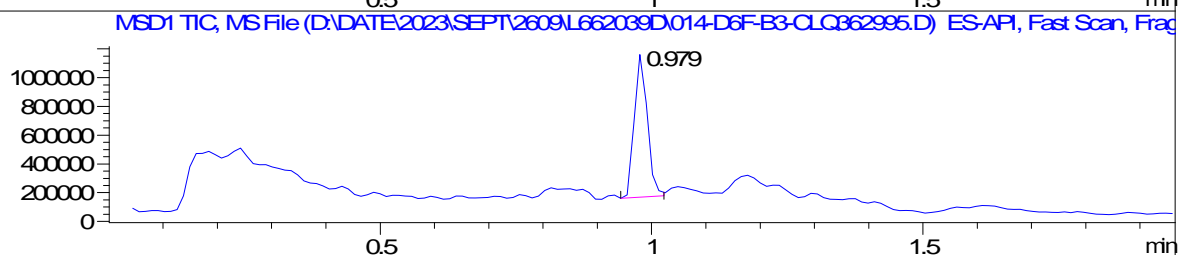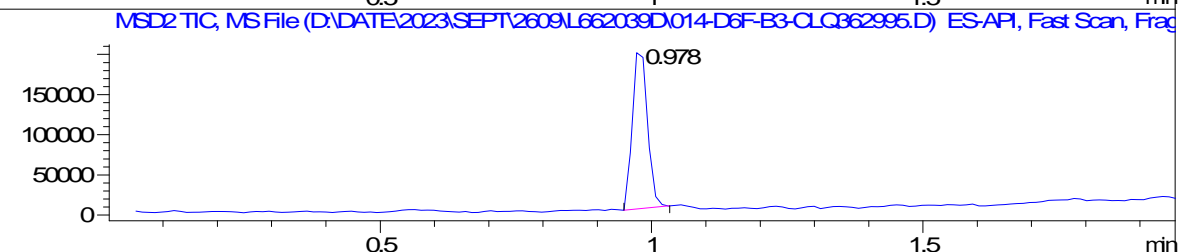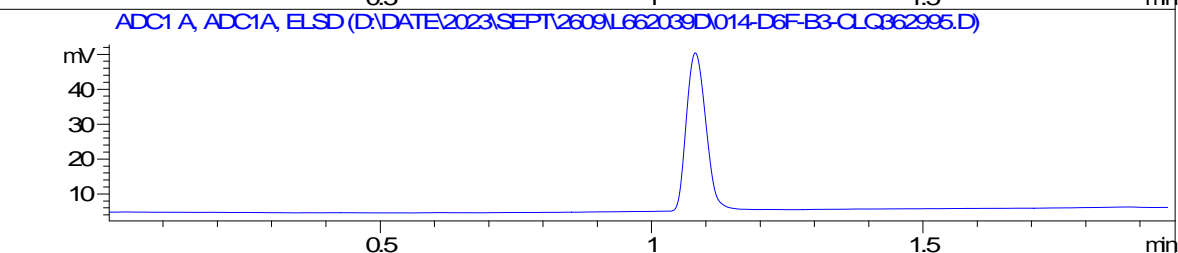

Mol Wt  
Exact Mass

0

| # | Time  | Area%  |
|---|-------|--------|
| 1 | 0.968 | 100.00 |

RT 0.979

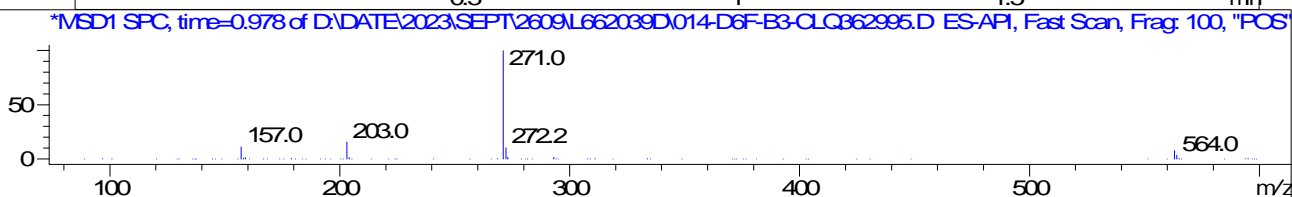

RT 0.978

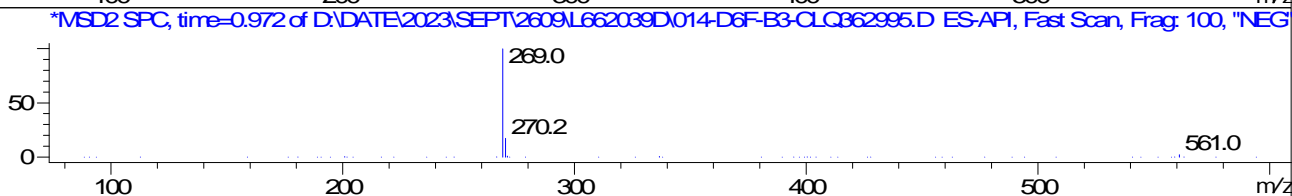

# IBOX14382

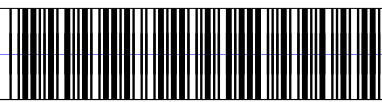

MaxPeak: 100.00%  
Ret\_Time: 1.106 min

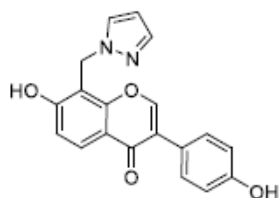

11d

Mol Wt 0  
Exact Mass

| # | Time  | Area%  |
|---|-------|--------|
| 1 | 1.106 | 100.00 |

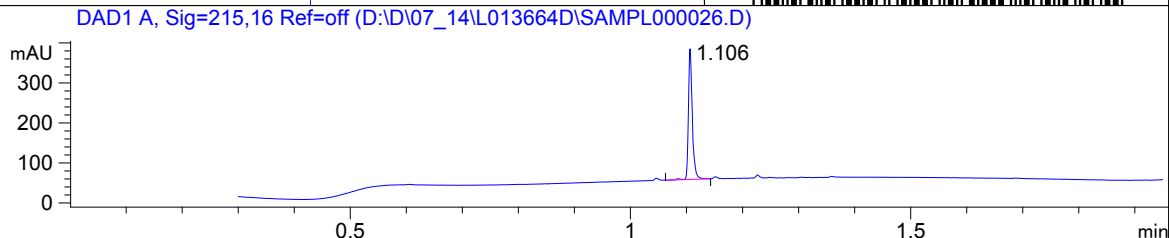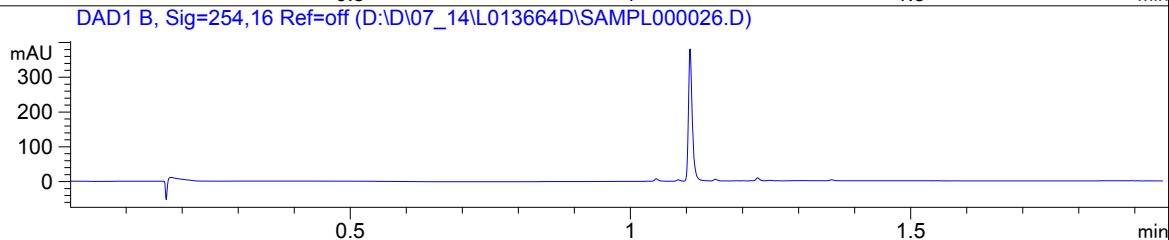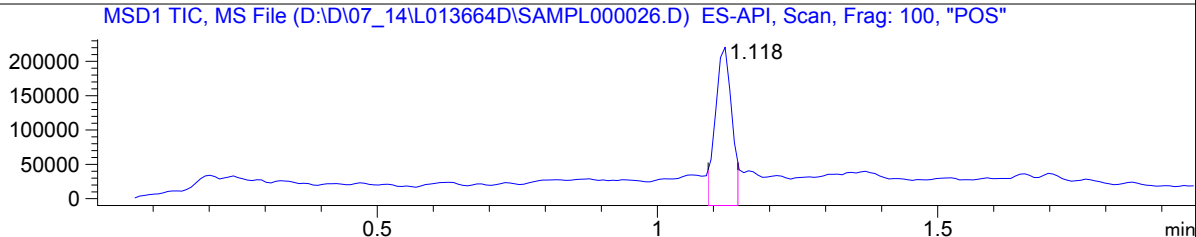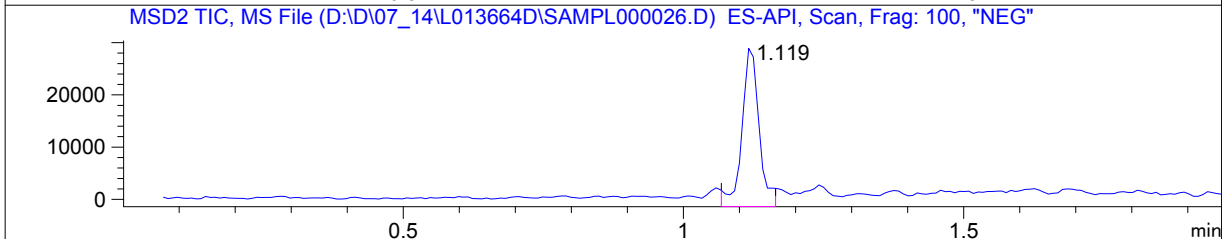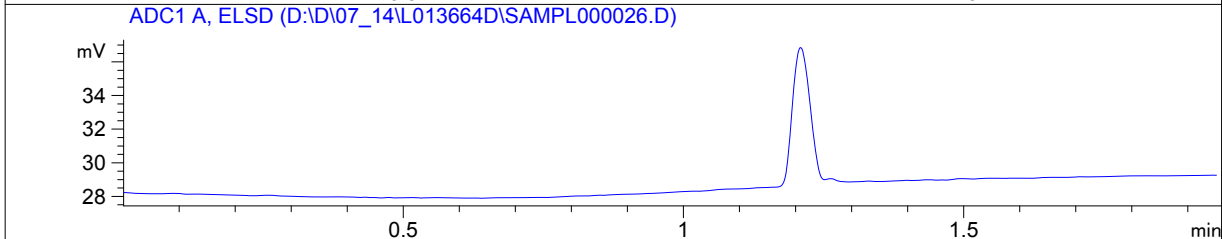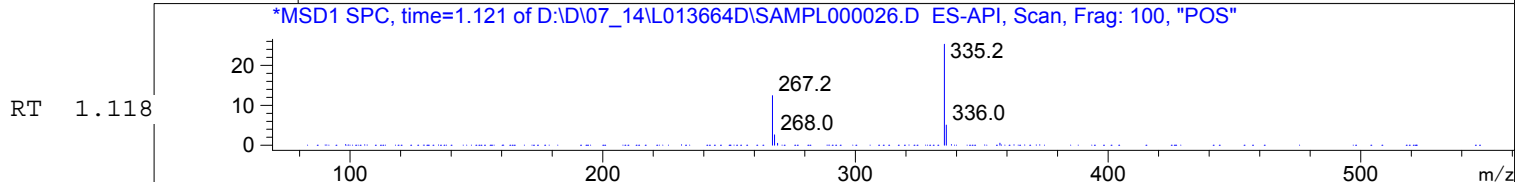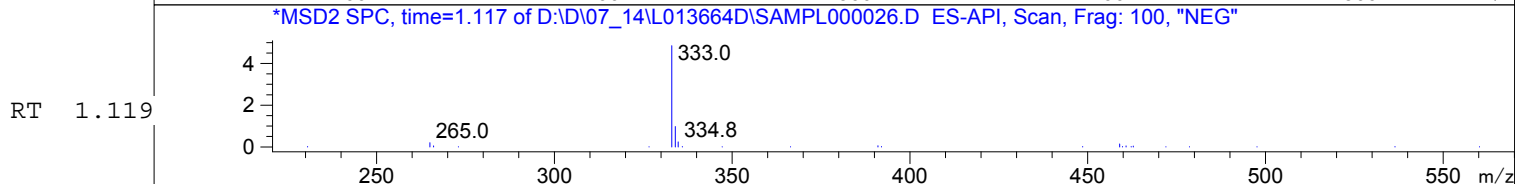



# CLQ377544

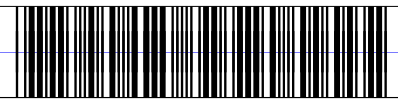

MaxPeak: 99.20%  
Ret\_Time: 1.039 min

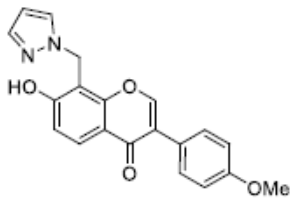

11e

Mol Wt

Exact Mass

| # | Time  | Area% |
|---|-------|-------|
| 1 | 1.039 | 99.20 |
| 2 | 1.110 | 0.80  |

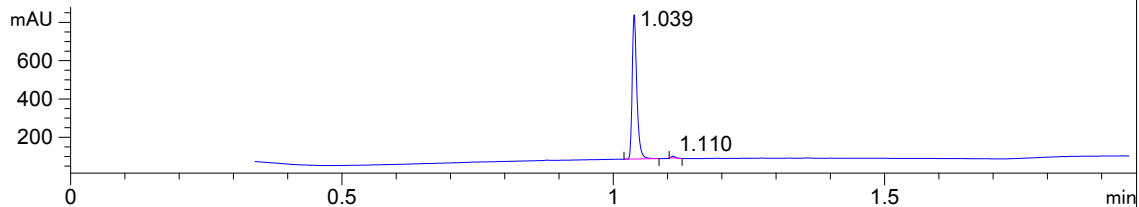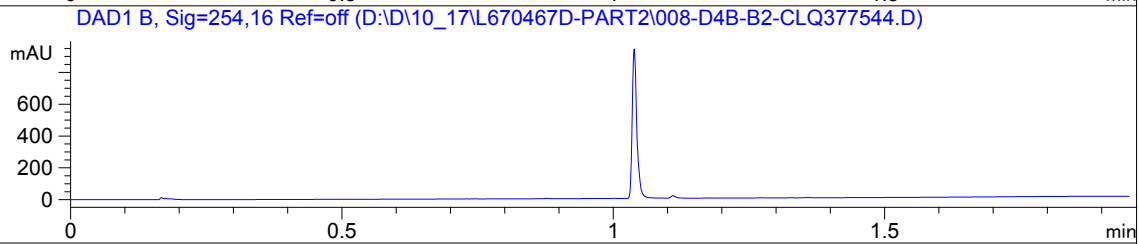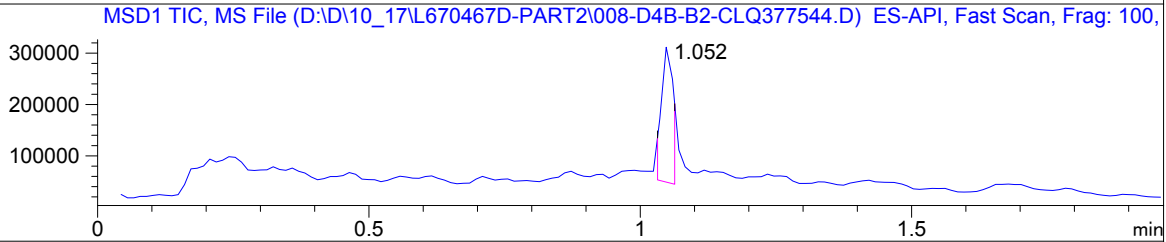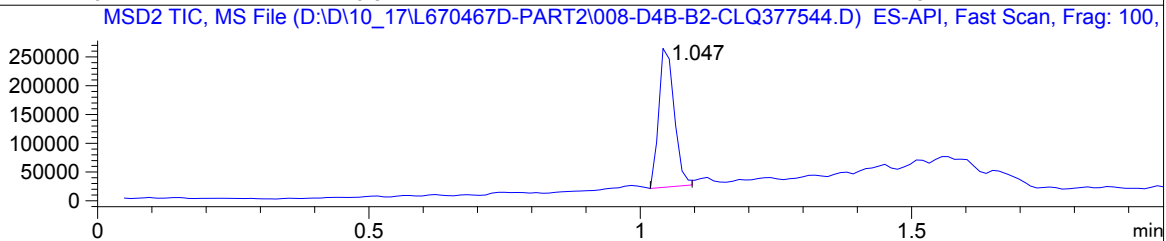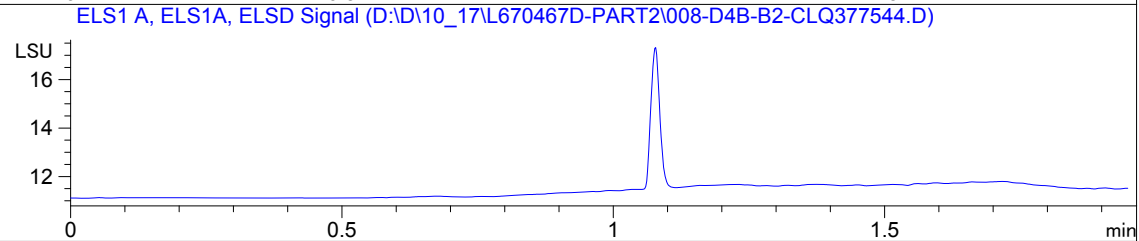

RT 1.052

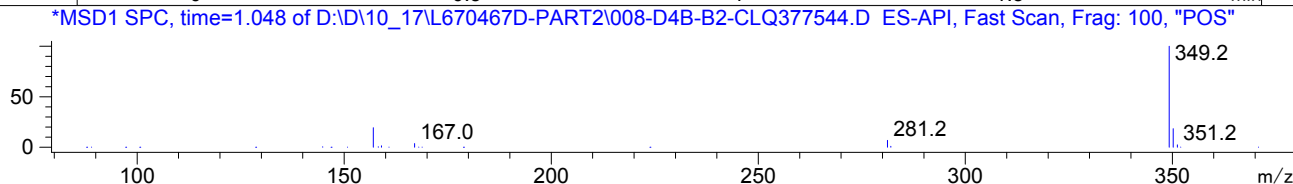

RT 1.047

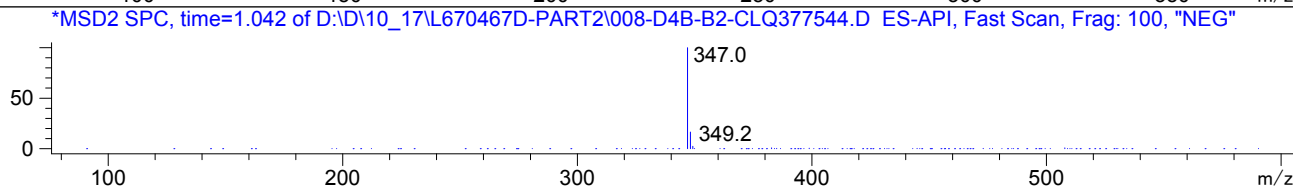

# CLQ377557

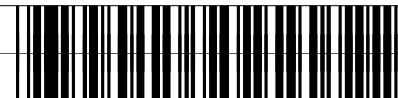

MaxPeak: 100.00%  
Ret\_Time: 1.014 min

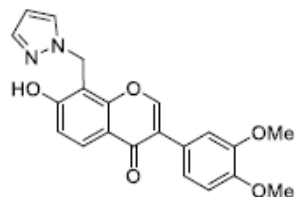

11f

Mol Wt

Exact Mass

| # | Time  | Area%  |
|---|-------|--------|
| 1 | 1.014 | 100.00 |

0

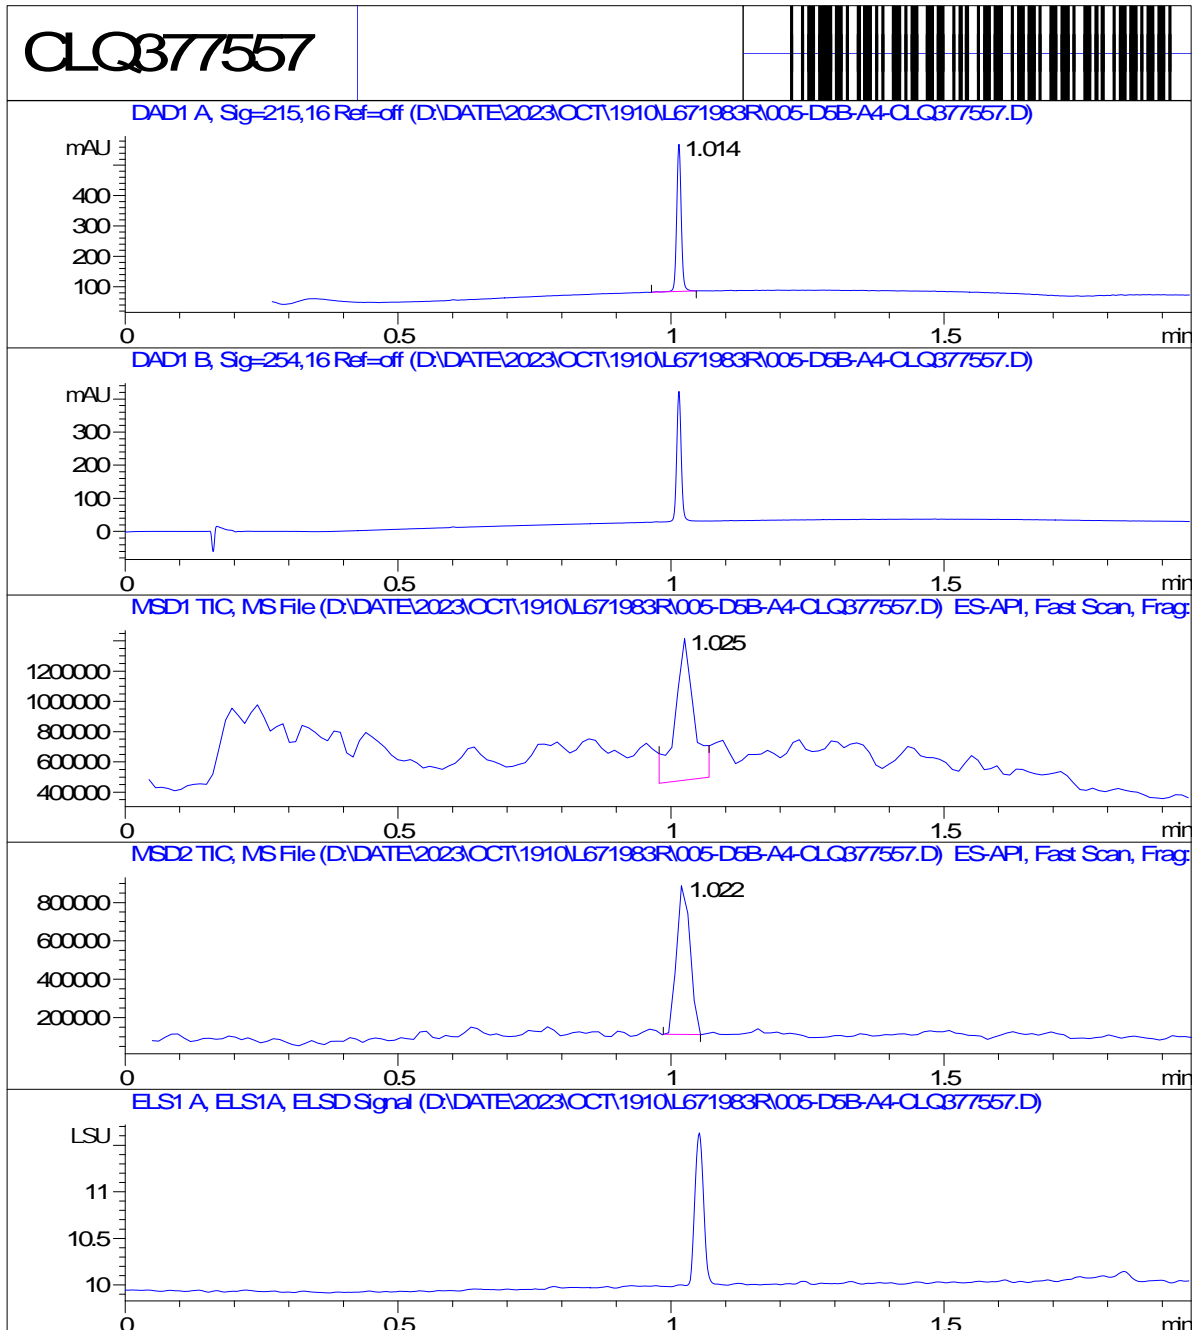

RT 1.025

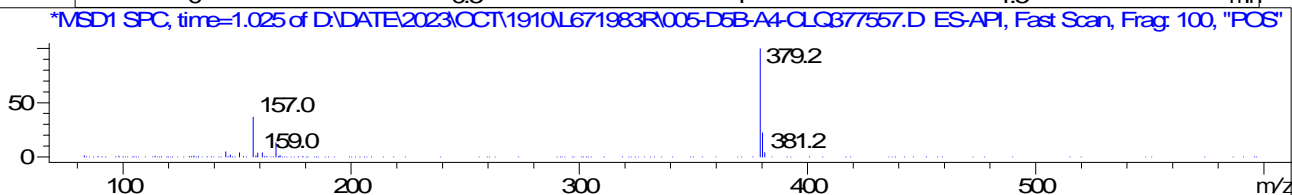

RT 1.022

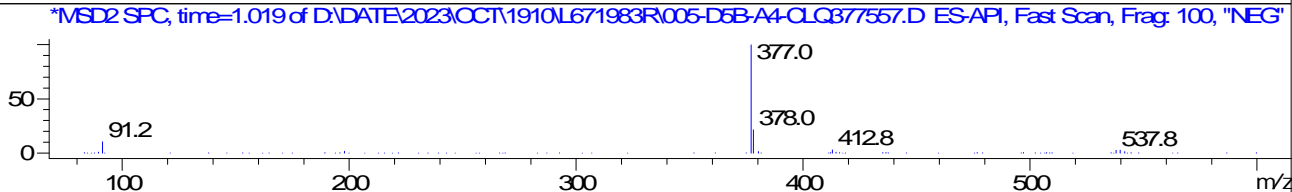

# CLQ377545

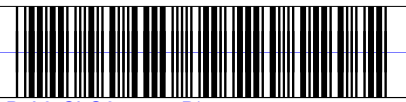

MaxPeak: 100.00%  
Ret\_Time: 1.022 min

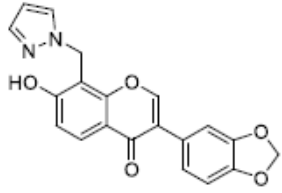

11g

Mol Wt 0  
Exact Mass

| # | Time  | Area%  |
|---|-------|--------|
| 1 | 1.022 | 100.00 |

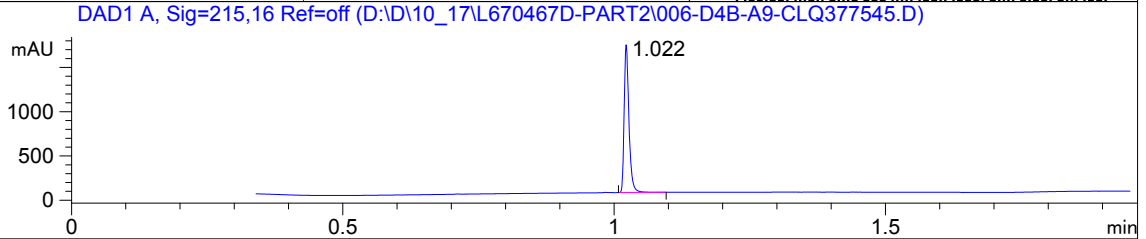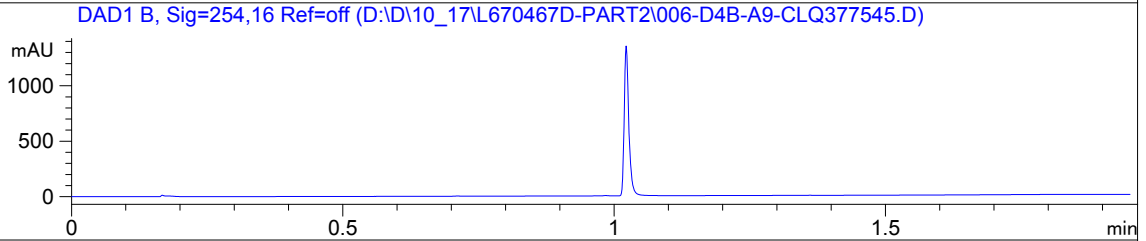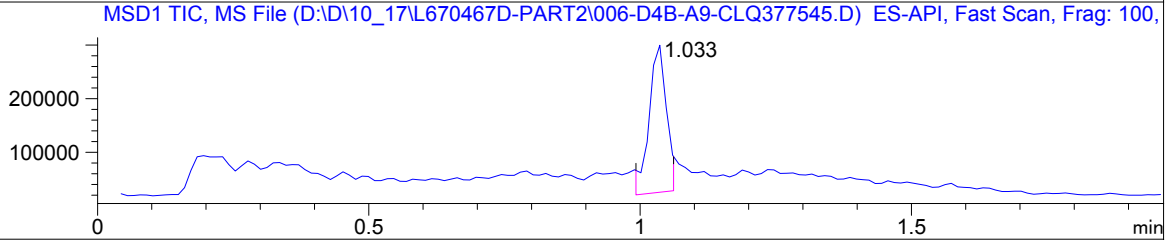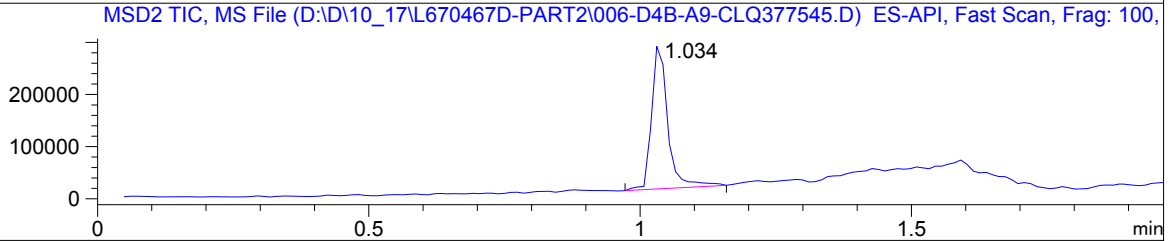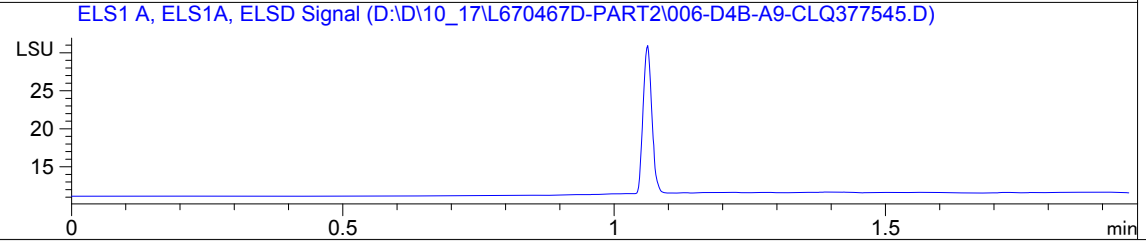

RT 1.033

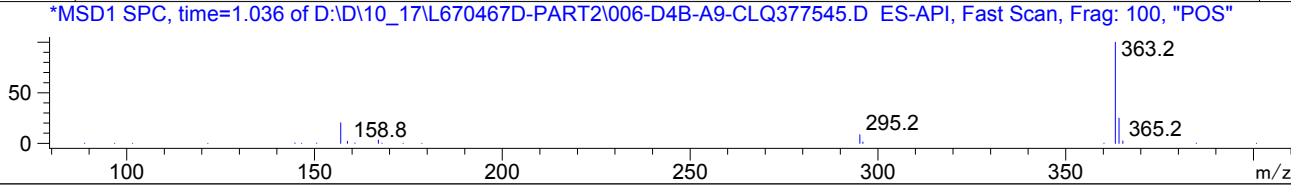

RT 1.034

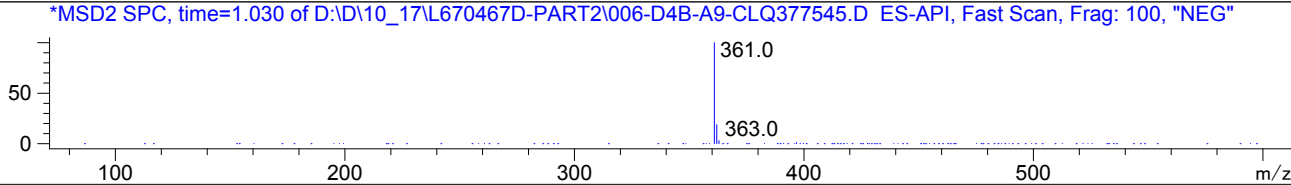

MaxPeak: 100.00%  
Ret\_Time: 1.235 min

# IBOX13834

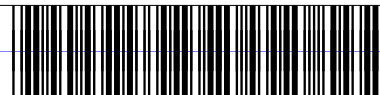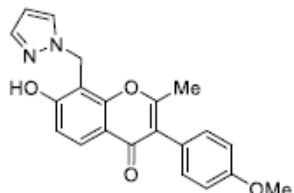

**11h**

**Mol Wt**  
**Exact Mass**

| # | Time  | Area%  |
|---|-------|--------|
| 1 | 1.235 | 100.00 |

DAD1 A, Sig=215,16 Ref=off (D:\DATE\MART\230316\L003762D\011-D7F-B1-IBOX13834.D)

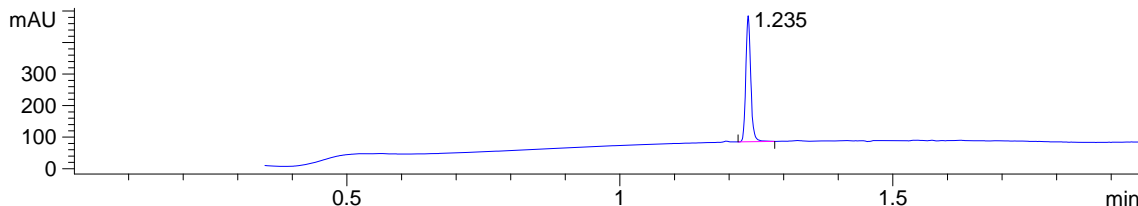

DAD1 B, Sig=254,16 Ref=off (D:\DATE\MART\230316\L003762D\011-D7F-B1-IBOX13834.D)

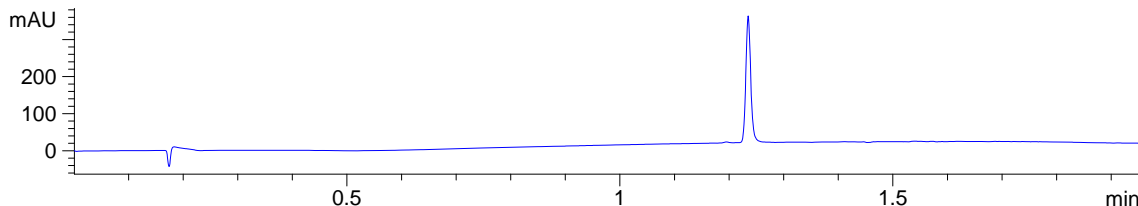

MSD1 TIC, MS File (D:\DATE\MART\230316\L003762D\011-D7F-B1-IBOX13834.D) ES-API, Scan, Frag: 100, "

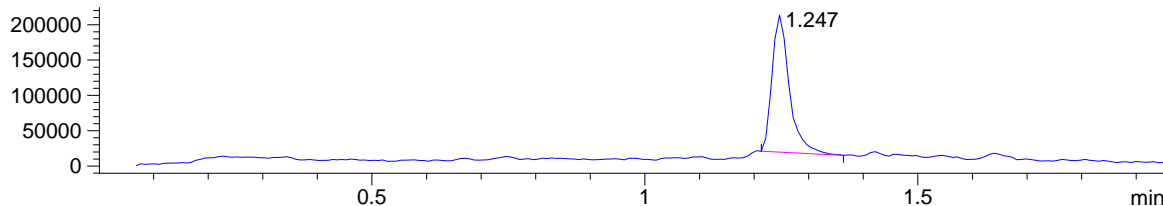

MSD2 TIC, MS File (D:\DATE\MART\230316\L003762D\011-D7F-B1-IBOX13834.D) ES-API, Scan, Frag: 100, "

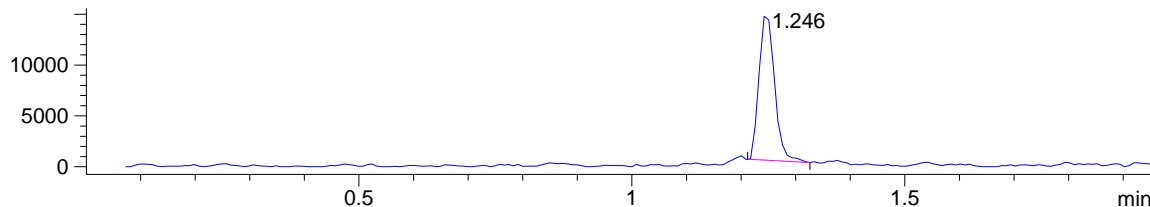

ADC1 A, ELSD (D:\DATE\MART\230316\L003762D\011-D7F-B1-IBOX13834.D)

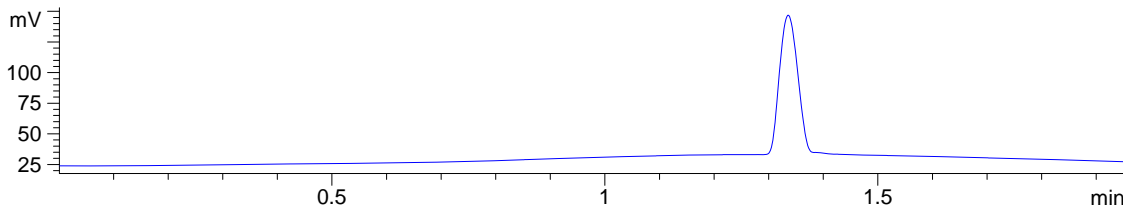

\*MSD1 SPC, time=1.247 of D:\DATE\MART\230316\L003762D\011-D7F-B1-IBOX13834.D ES-API, Scan, Frag: 100, "POS"

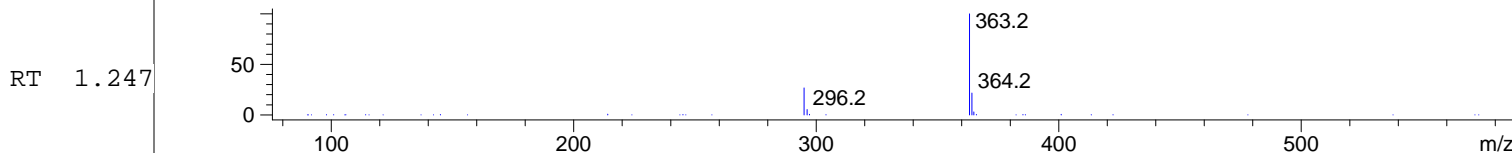

\*MSD2 SPC, time=1.246 of D:\DATE\MART\230316\L003762D\011-D7F-B1-IBOX13834.D ES-API, Scan, Frag: 100, "NEG"

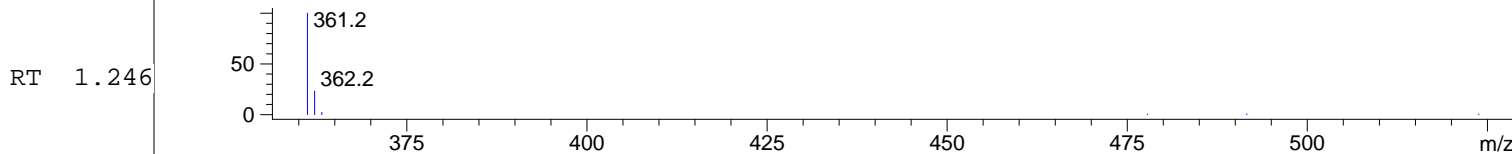

MaxPeak: 100.00%  
Ret\_Time: 1.398 min

# CLQ377164

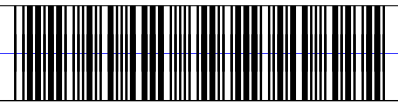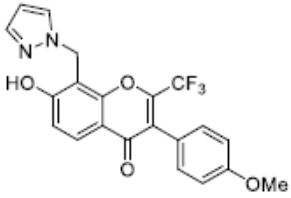

11i

Mol Wt 0  
Exact Mass

| # | Time  | Area%  |
|---|-------|--------|
| 1 | 1.398 | 100.00 |

DAD1 A, Sig=215,10 Ref=off (D:\DATE\0928\L662928D\SAMPL023.D)

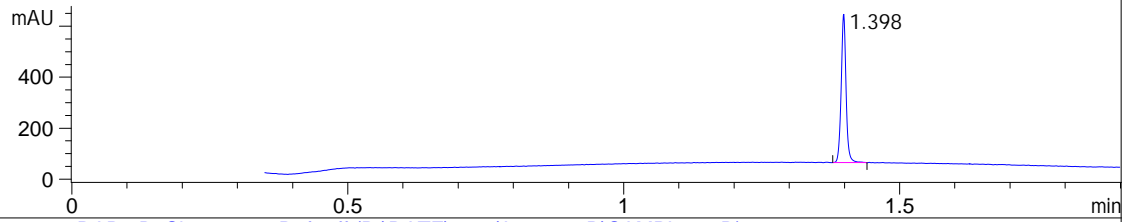

DAD1 B, Sig=254,10 Ref=off (D:\DATE\0928\L662928D\SAMPL023.D)

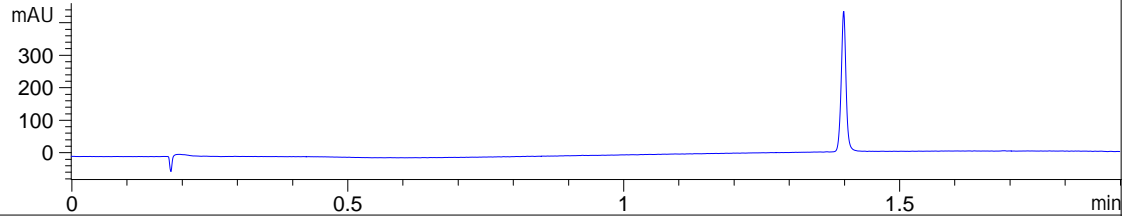

MSD1 TIC, MS File (D:\DATE\0928\L662928D\SAMPL023.D) API-ES, Scan, Frag: 120, "Pos"

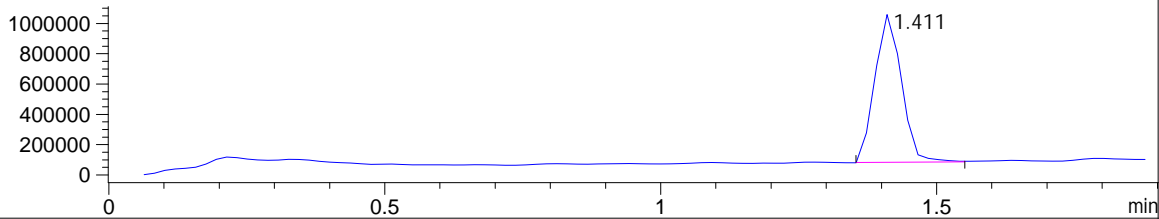

MSD2 TIC, MS File (D:\DATE\0928\L662928D\SAMPL023.D) , Scan, Frag: 120, "Neg"

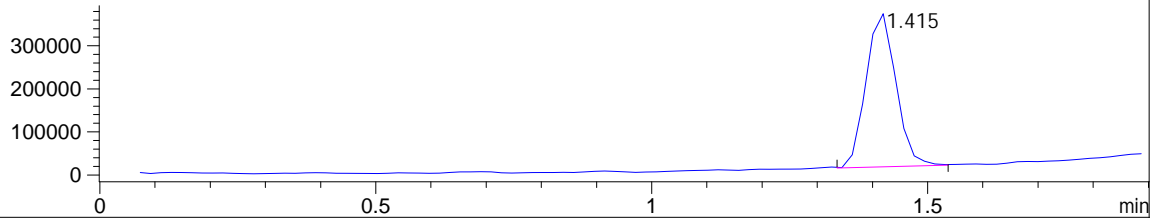

ADC1 A, ADC1 ELSD (D:\DATE\0928\L662928D\SAMPL023.D)

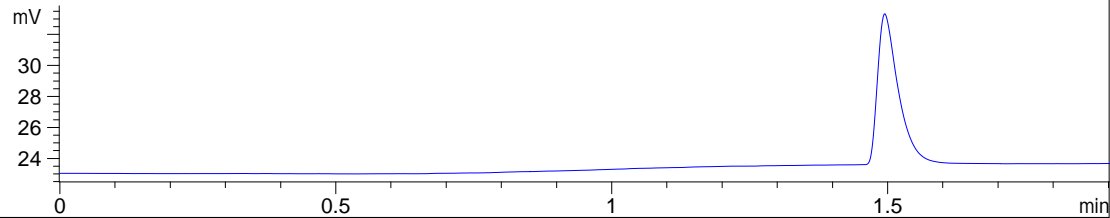

\*MSD1 SPC, time=1.410 of D:\DATE\0928\L662928D\SAMPL023.D API-ES, Scan, Frag: 120, "Pos"

RT 1.411

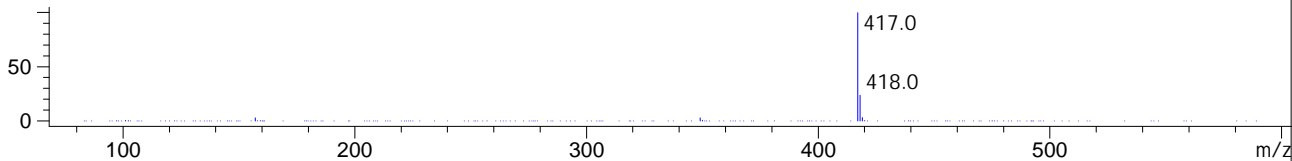

\*MSD2 SPC, time=1.419 of D:\DATE\0928\L662928D\SAMPL023.D , Scan, Frag: 120, "Neg"

RT 1.415

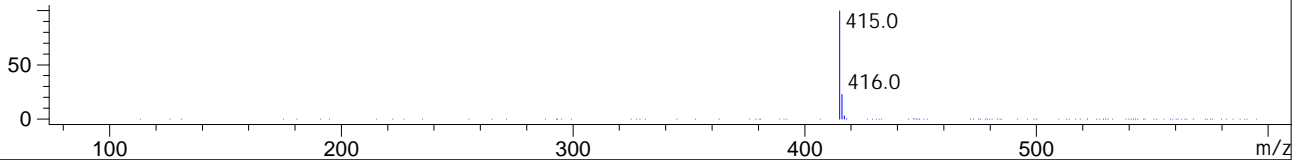

MaxPeak: 100.00%  
Ret\_Time: 1.417 min

CLQ377171

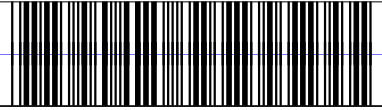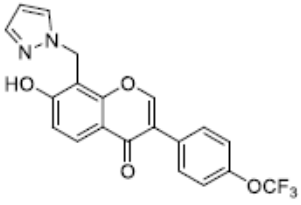

11j

Mol Wt  
Exact Mass

| # | Time  | Area%  |
|---|-------|--------|
| 1 | 1.417 | 100.00 |

0

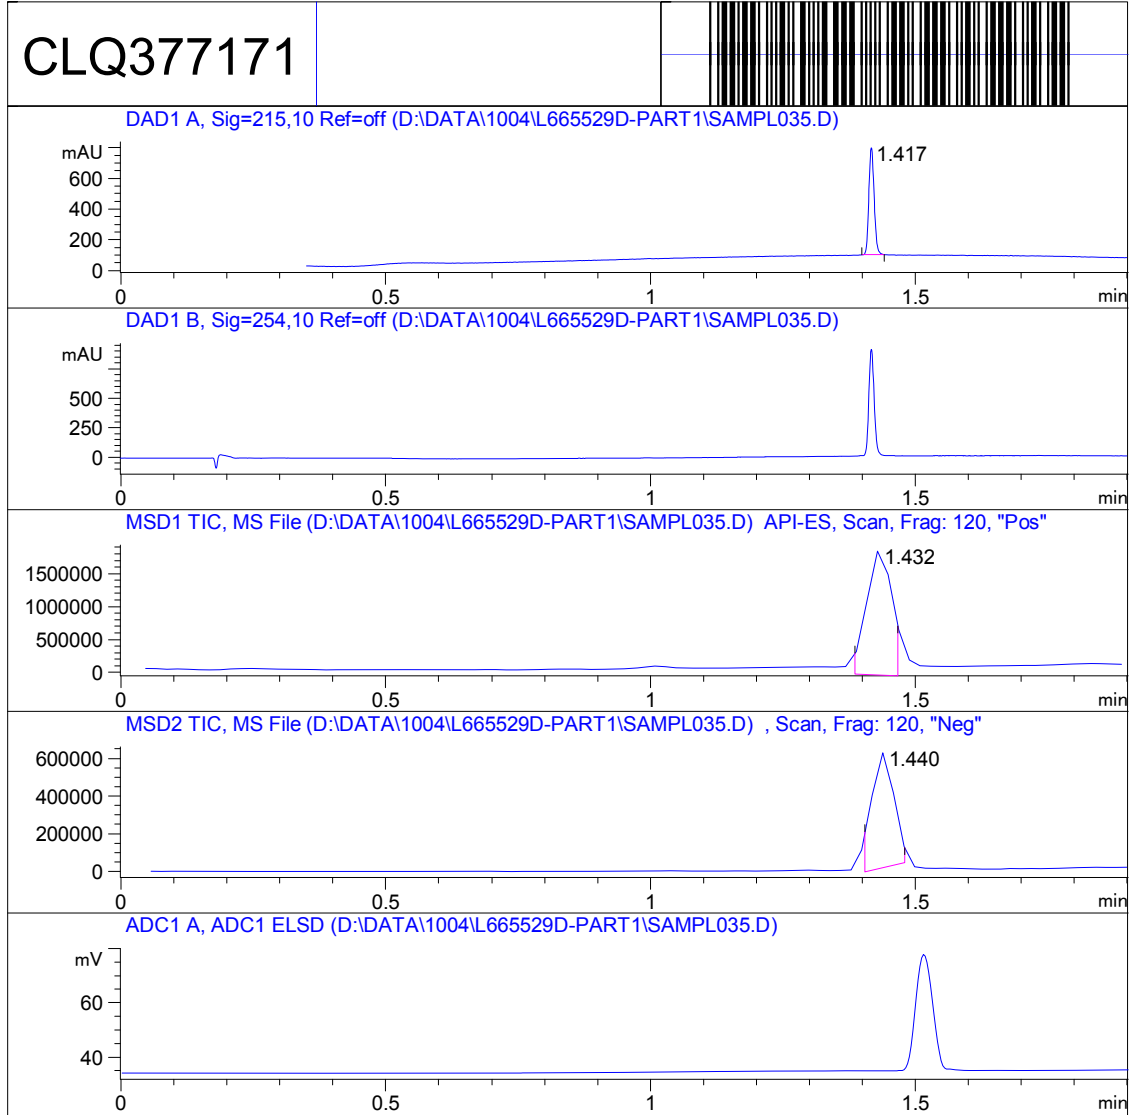

\*MSD1 SPC, time=1.428 of D:\DATA\1004\L665529D-PART1\SAMPL035.D API-ES, Scan, Frag: 120, "Pos"

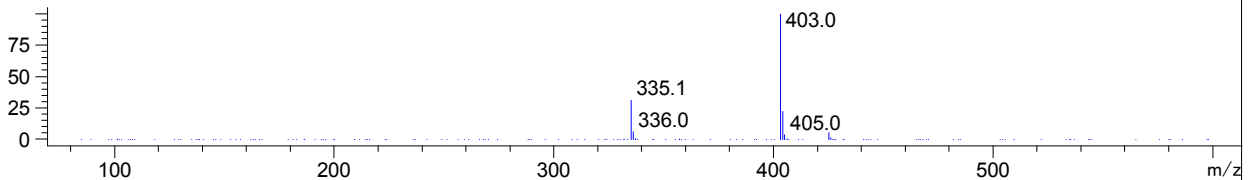

\*MSD2 SPC, time=1.438 of D:\DATA\1004\L665529D-PART1\SAMPL035.D , Scan, Frag: 120, "Neg"

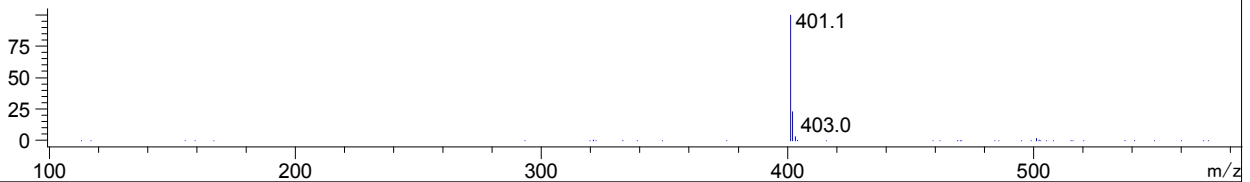

MaxPeak: 98.32%  
Ret\_Time: 1.131 min

# IBOX13639

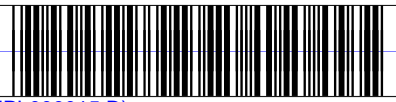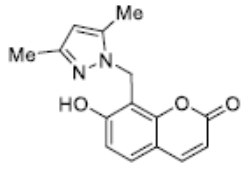

12a

0

Mol Wt  
Exact Mass

| # | Time  | Area% |
|---|-------|-------|
| 1 | 1.131 | 98.32 |
| 2 | 1.240 | 1.68  |

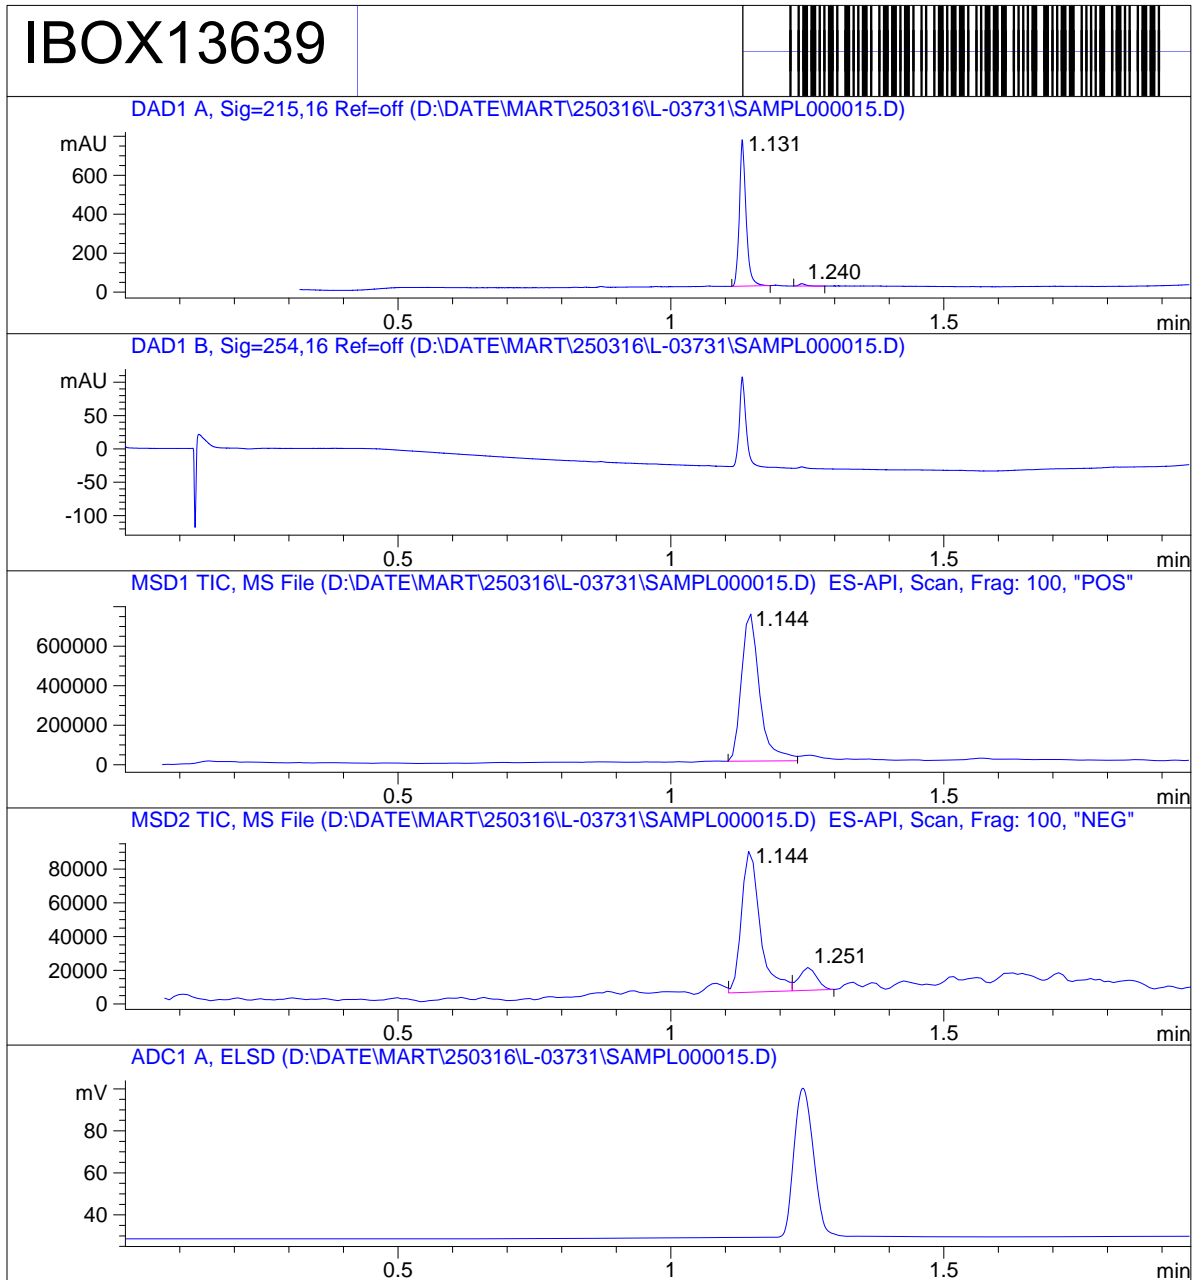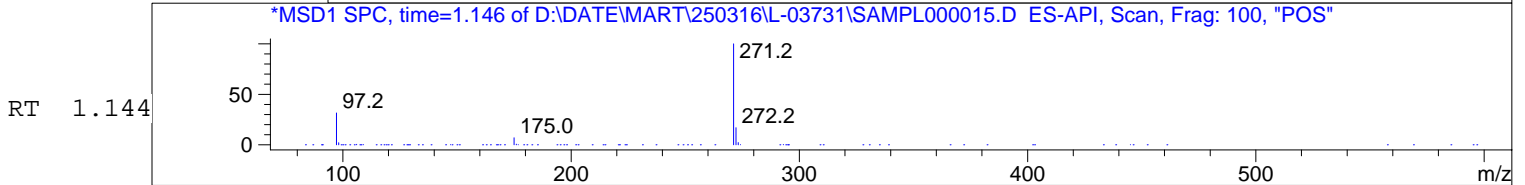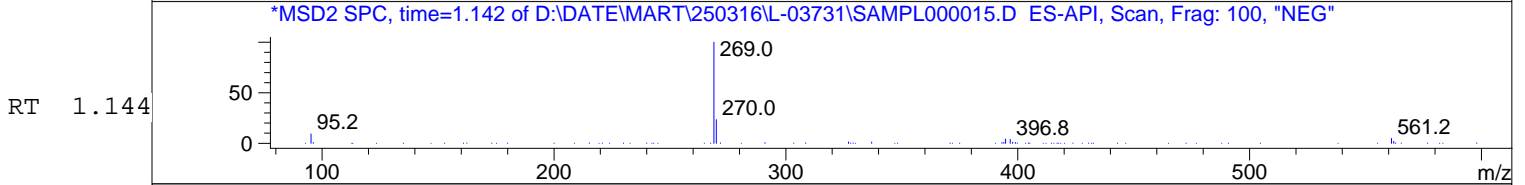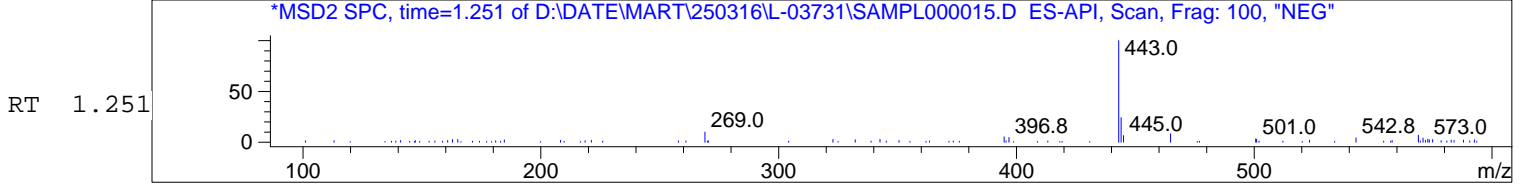

MaxPeak: 100.00%  
Ret\_Time: 1.287 min

# CLQ377168

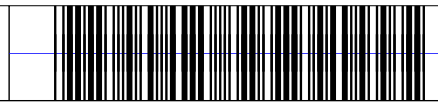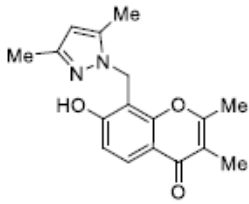

12b

Mol Wt 0  
Exact Mass

| # | Time  | Area%  |
|---|-------|--------|
| 1 | 1.287 | 100.00 |

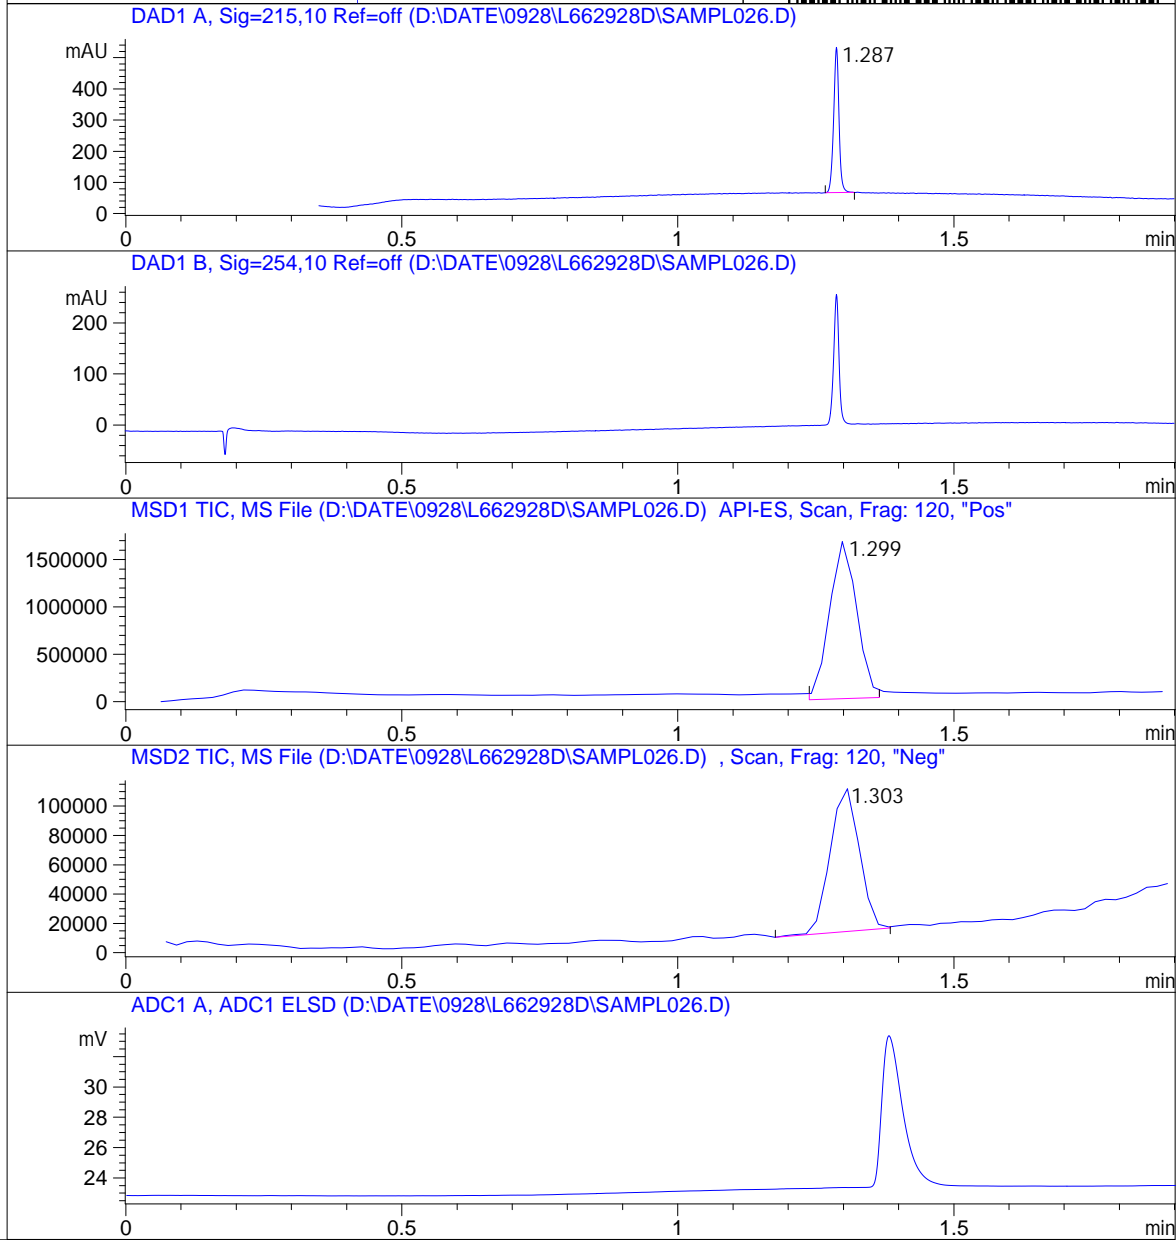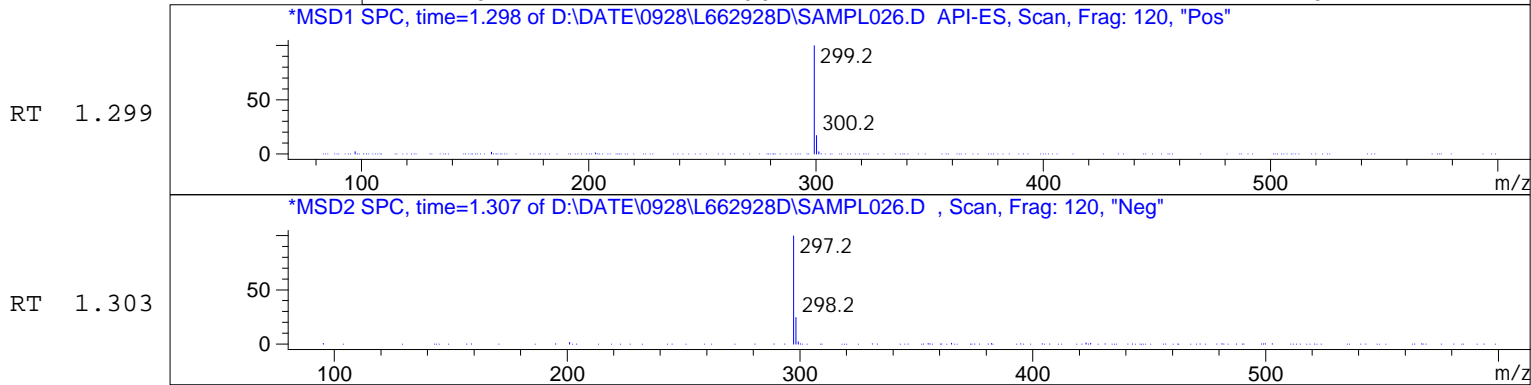



MaxPeak: 90.26%  
Ret\_Time: 1.253 min

# CLQ377167

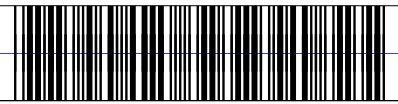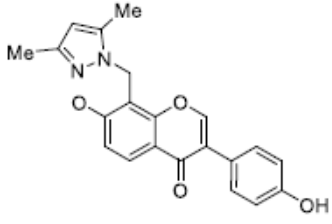

12c

Mol Wt 0  
Exact Mass

| # | Time  | Area% |
|---|-------|-------|
| 1 | 1.253 | 90.26 |
| 2 | 1.328 | 9.74  |

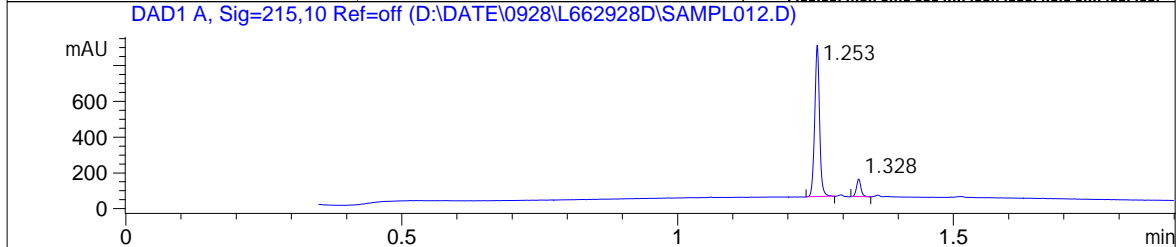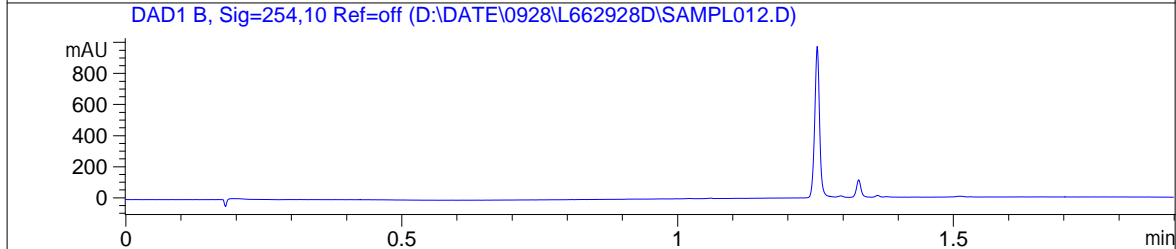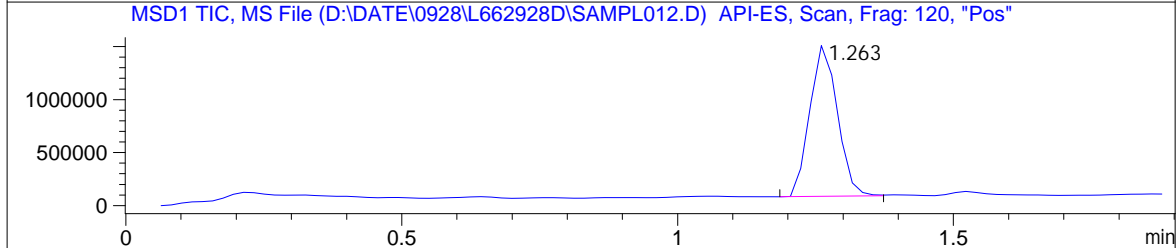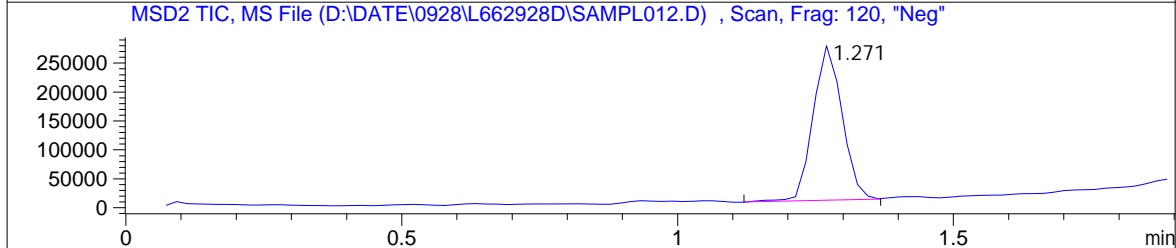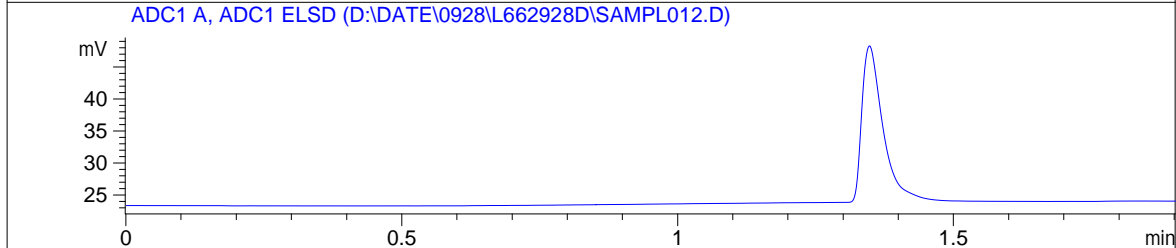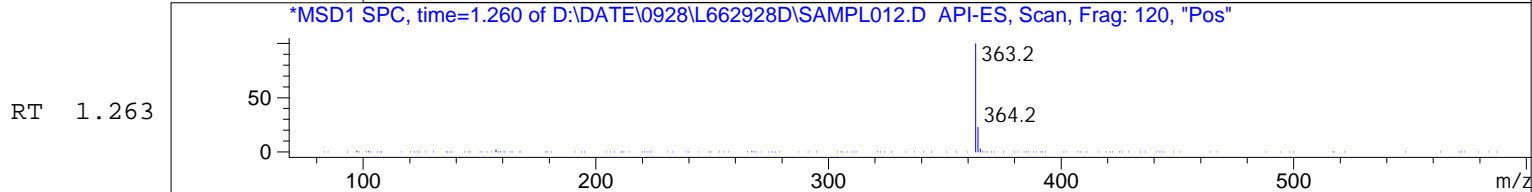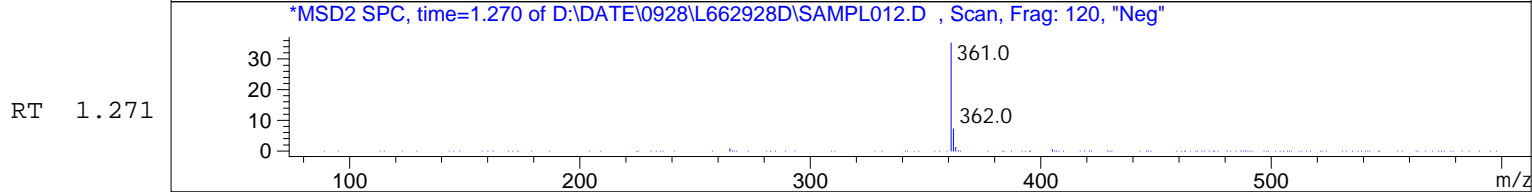

MaxPeak: 100.00%  
Ret\_Time: 1.482 min

# IBOX27740

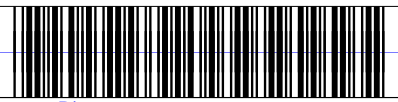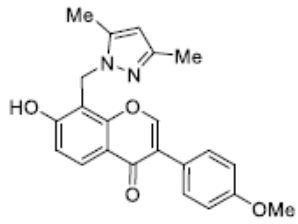

**12d**

**Mol Wt 0**

**Exact Mass**

| # | Time  | Area%  |
|---|-------|--------|
| 1 | 1.482 | 100.00 |

DAD1 A, Sig=215,16 Ref=off (D:\DATE\01 21\L220272D\SAMPL000011.D)

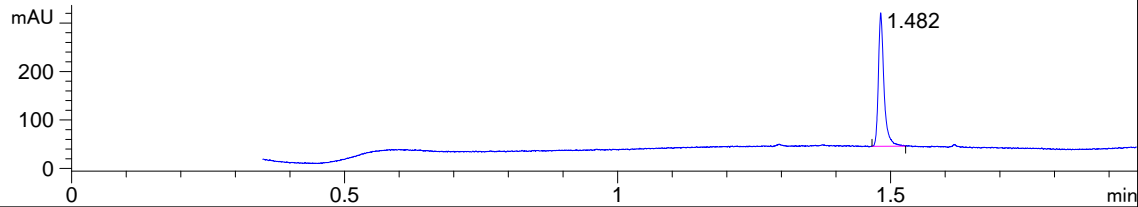

DAD1 B, Sig=254,16 Ref=off (D:\DATE\01 21\L220272D\SAMPL000011.D)

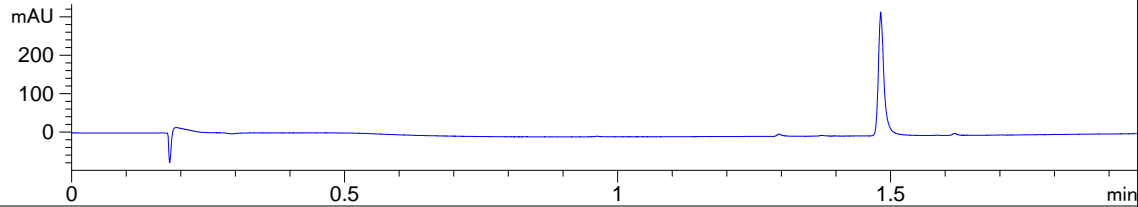

MSD1 TIC, MS File (D:\DATE\01 21\L220272D\SAMPL000011.D) ES-API, Scan, Frag: 100, "POS"

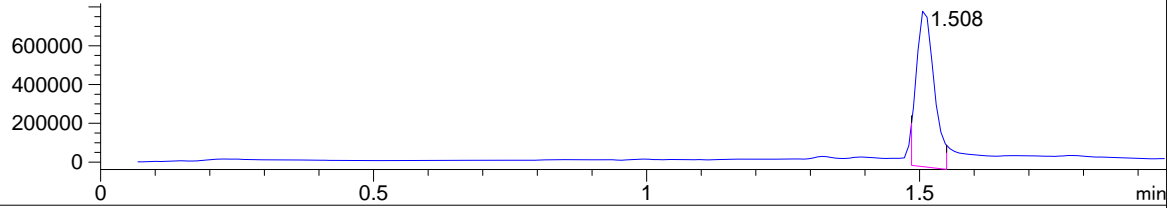

MSD2 TIC, MS File (D:\DATE\01 21\L220272D\SAMPL000011.D) ES-API, Scan, Frag: 100, "NEG"

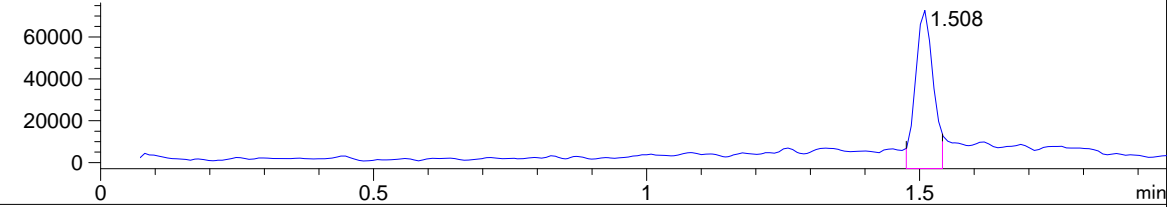

ADC1 A, ADC1 (D:\DATE\01 21\L220272D\SAMPL000011.D)

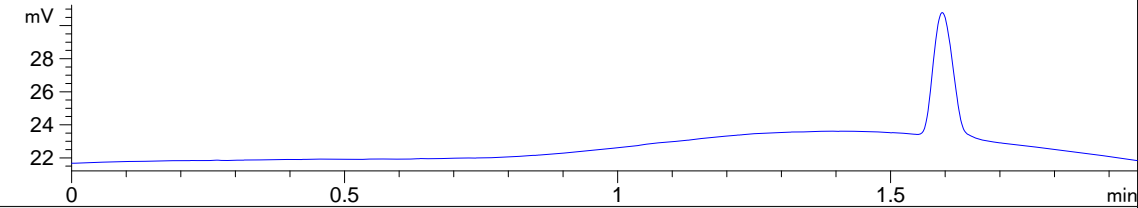

\*MSD1 SPC, time=1.505 of D:\DATE\01 21\L220272D\SAMPL000011.D ES-API, Scan, Frag: 100, "POS"

RT 1.508

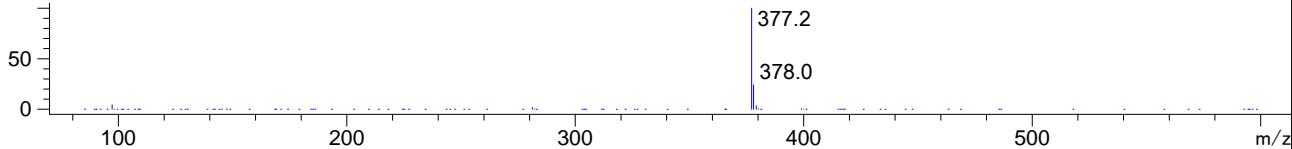

\*MSD2 SPC, time=1.510 of D:\DATE\01 21\L220272D\SAMPL000011.D ES-API, Scan, Frag: 100, "NEG"

RT 1.508

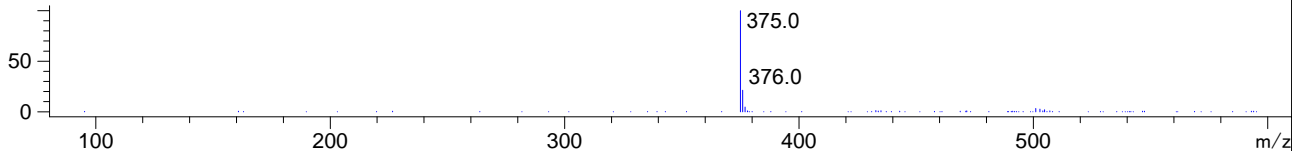

MaxPeak: 95.89%  
Ret\_Time: 1.310 min

# IBOX13687

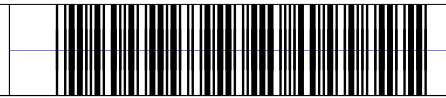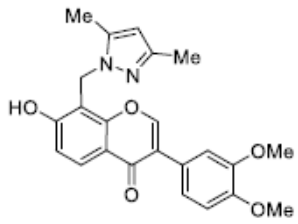

12e

Mol Wt  
Exact Mass

0

# Time Area%

| # | Time  | Area% |
|---|-------|-------|
| 1 | 1.310 | 95.89 |
| 2 | 1.377 | 4.11  |

DAD1 A, Sig=215,16 Ref=off (D:\DATE\MARCH\230316\L03689D\SAMPL000006.D)

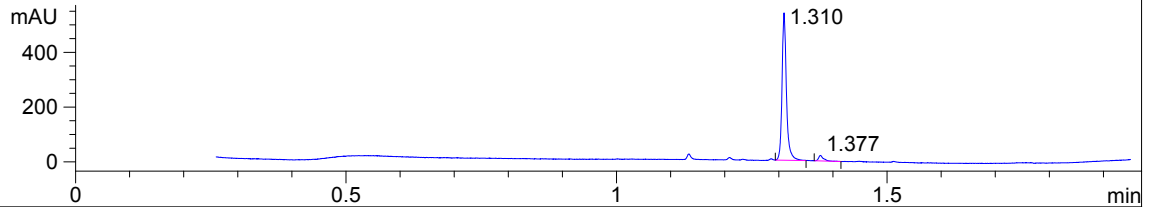

DAD1 B, Sig=254,16 Ref=off (D:\DATE\MARCH\230316\L03689D\SAMPL000006.D)

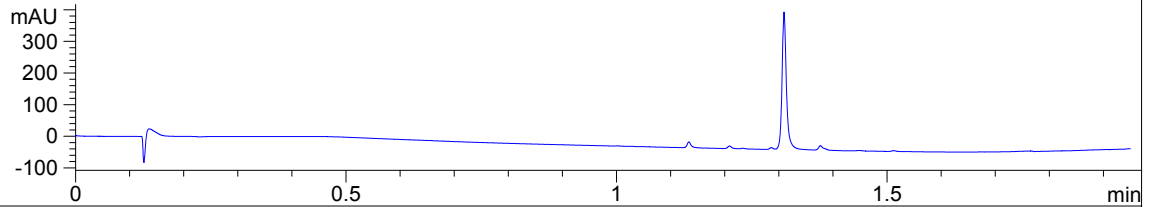

MSD1 TIC, MS File (D:\DATE\MARCH\230316\L03689D\SAMPL000006.D) ES-API, Scan, Frag: 100, "POS"

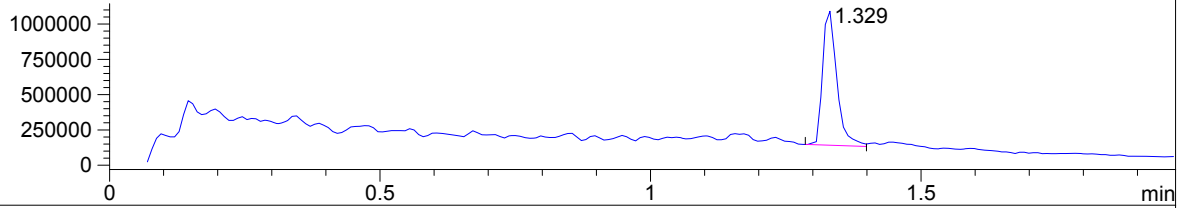

MSD2 TIC, MS File (D:\DATE\MARCH\230316\L03689D\SAMPL000006.D) ES-API, Scan, Frag: 100, "NEG"

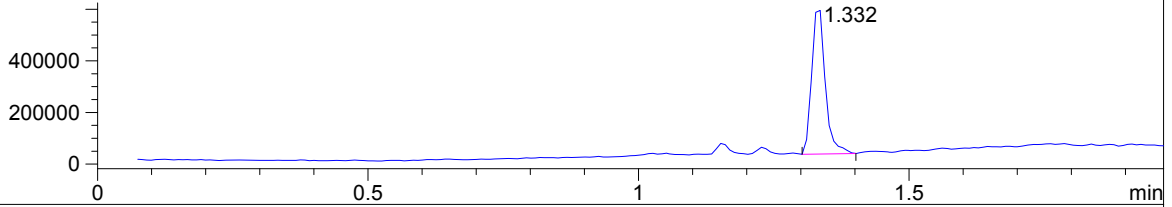

ADC1 A, ADC1 (D:\DATE\MARCH\230316\L03689D\SAMPL000006.D)

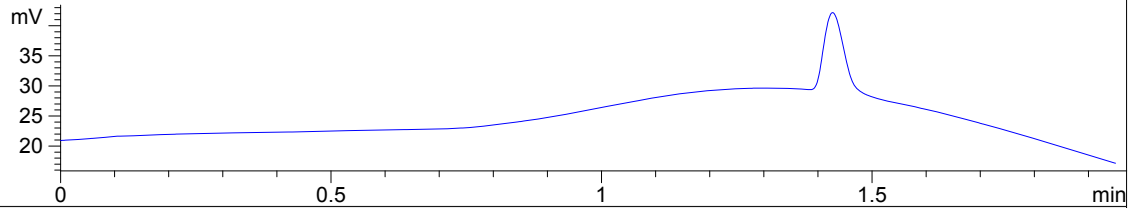

\*MSD1 SPC, time=1.332 of D:\DATE\MARCH\230316\L03689D\SAMPL000006.D ES-API, Scan, Frag: 100, "POS"

RT 1.329

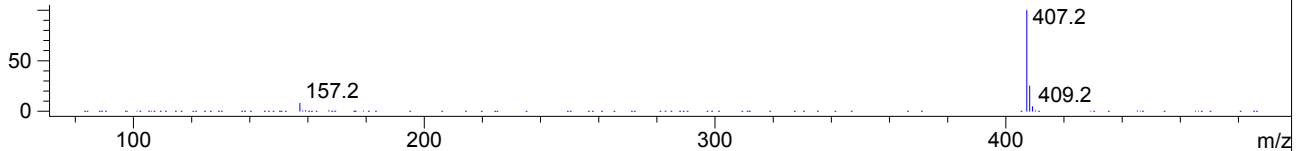

\*MSD2 SPC, time=1.336 of D:\DATE\MARCH\230316\L03689D\SAMPL000006.D ES-API, Scan, Frag: 100, "NEG"

RT 1.332

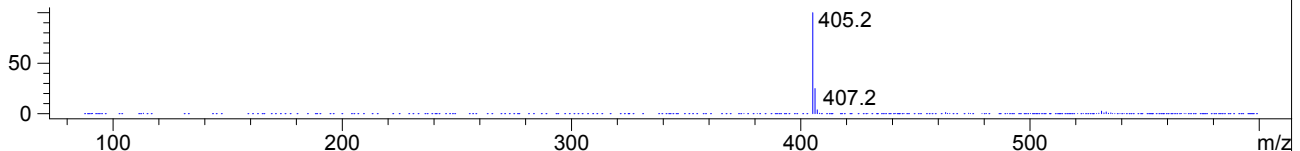

# CLQ377548

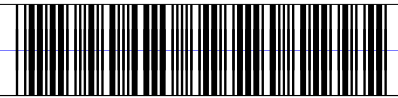

MaxPeak: 100.00%  
Ret\_Time: 1.186 min

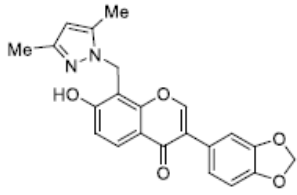

12f

Mol Wt  
Exact Mass

0

| # | Time  | Area%  |
|---|-------|--------|
| 1 | 1.186 | 100.00 |

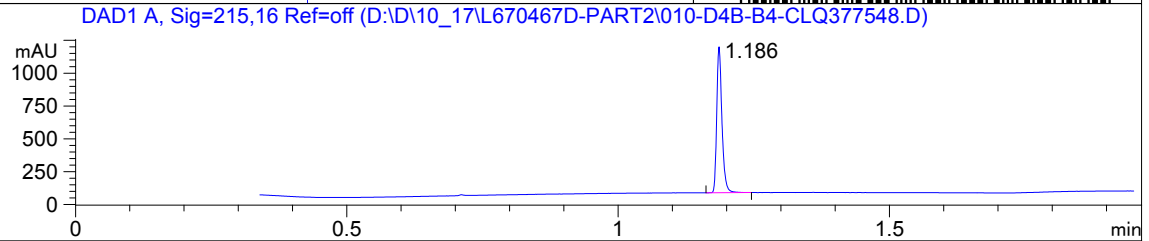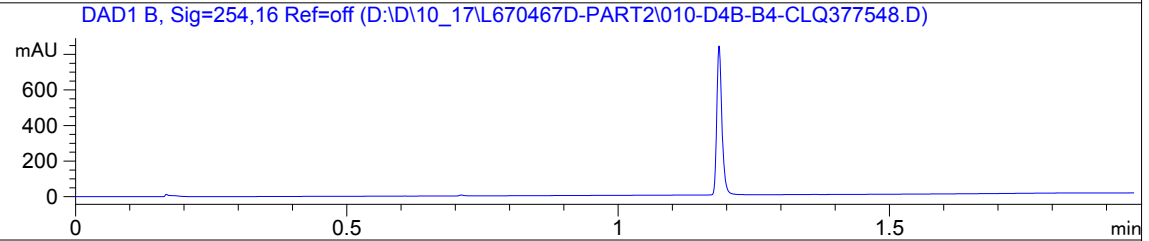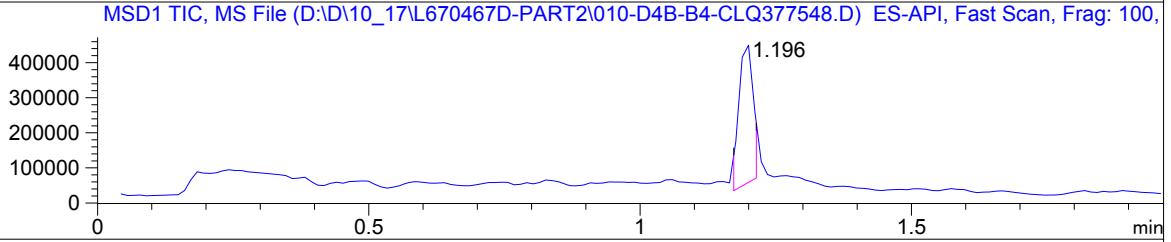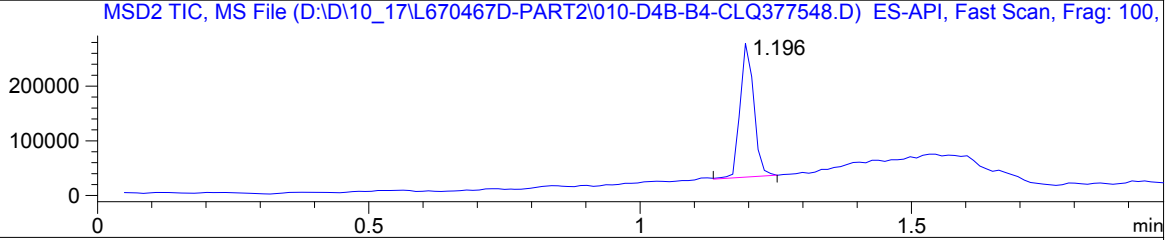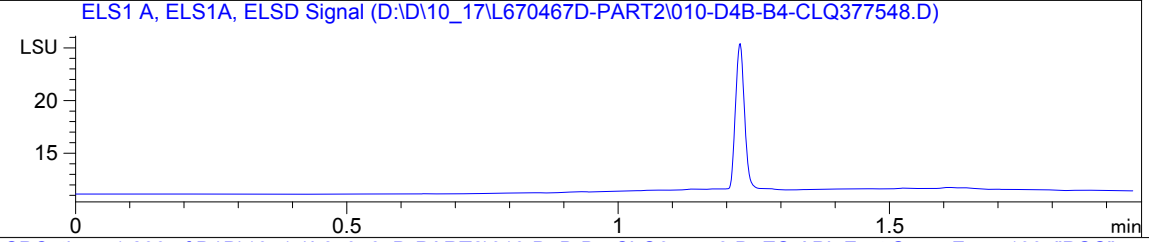

RT 1.196

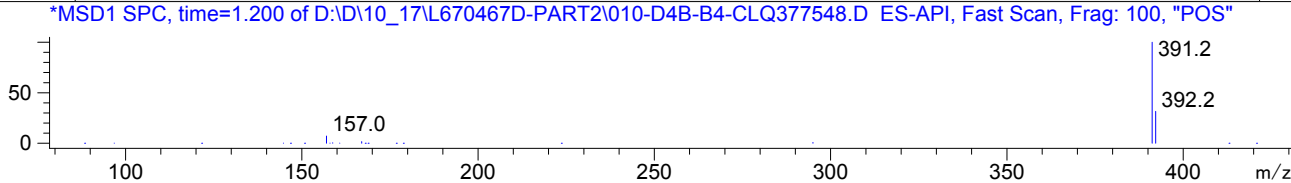

RT 1.196

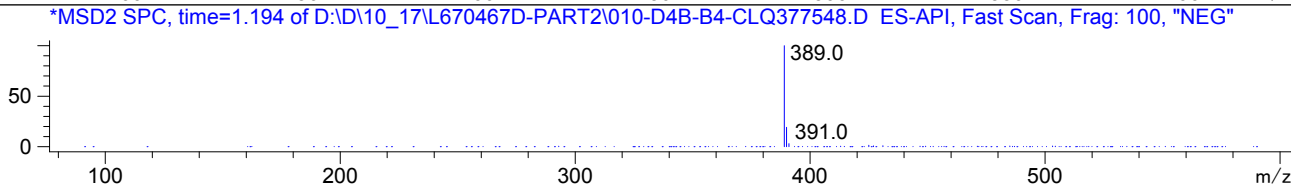

MaxPeak: 100.00%  
Ret\_Time: 1.434 min

# IBOX13847

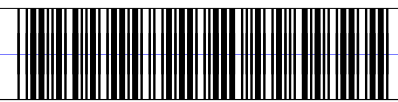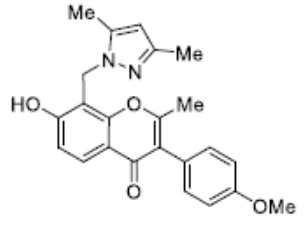

12g

Mol Wt

Exact Mass

| # | Time  | Area%  |
|---|-------|--------|
| 1 | 1.434 | 100.00 |

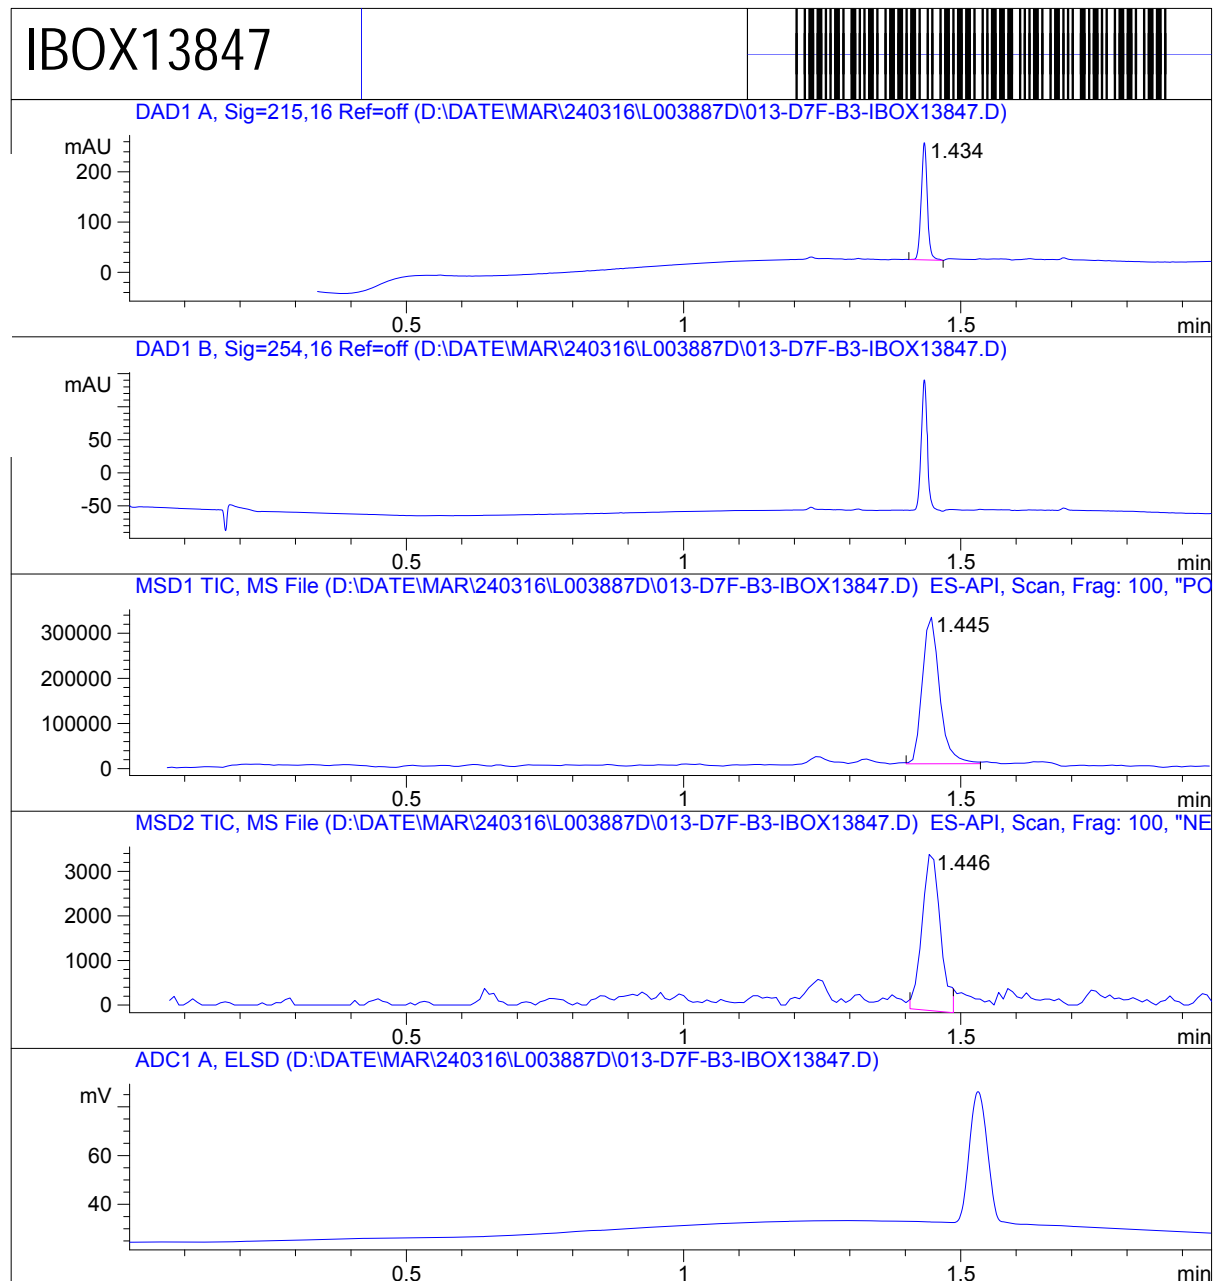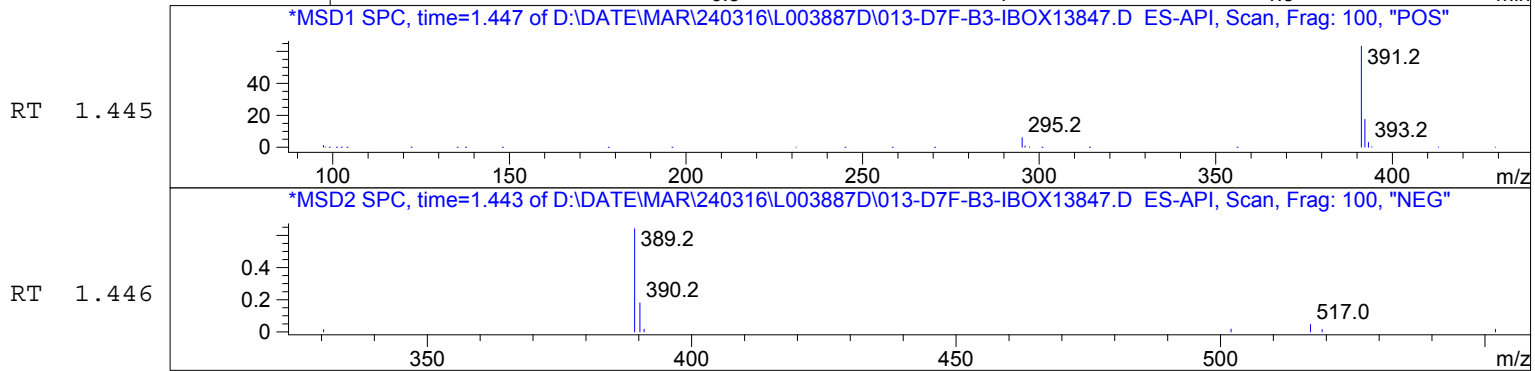

MaxPeak: 97.08%  
Ret\_Time: 1.616 min

# CLQ377165

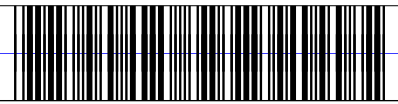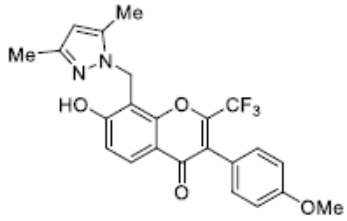

12h

Mol Wt 0  
Exact Mass

| # | Time  | Area% |
|---|-------|-------|
| 1 | 1.616 | 97.08 |
| 2 | 1.805 | 2.92  |

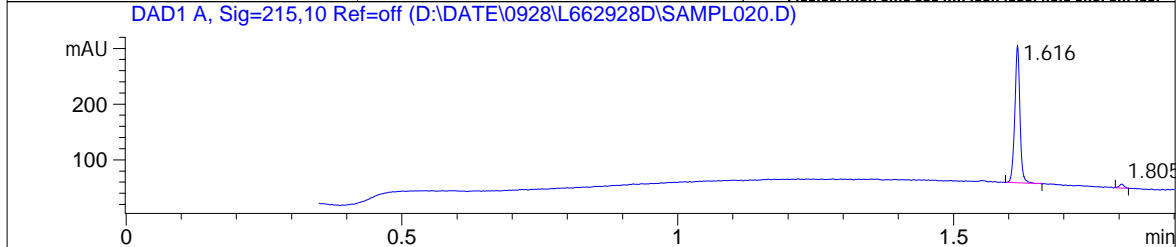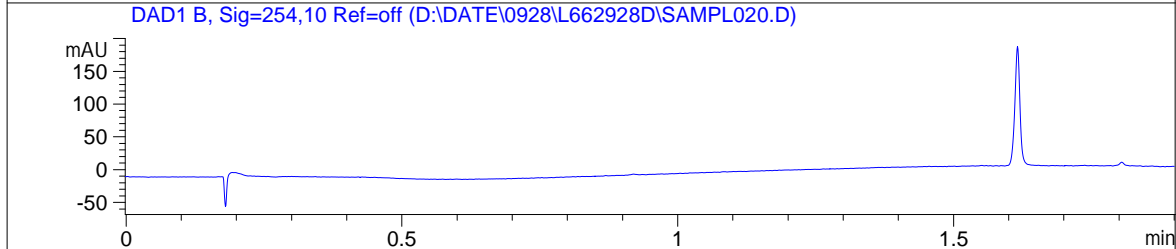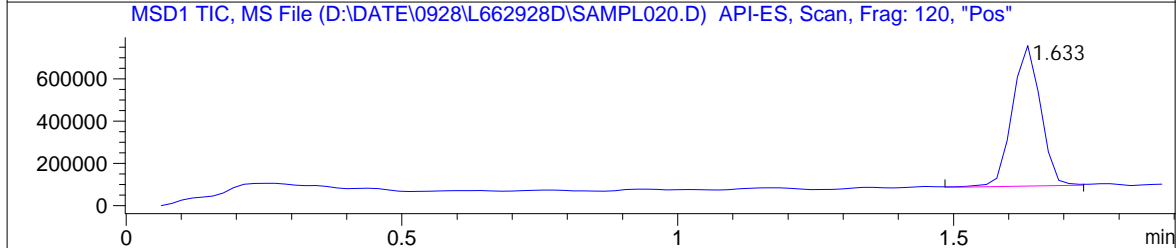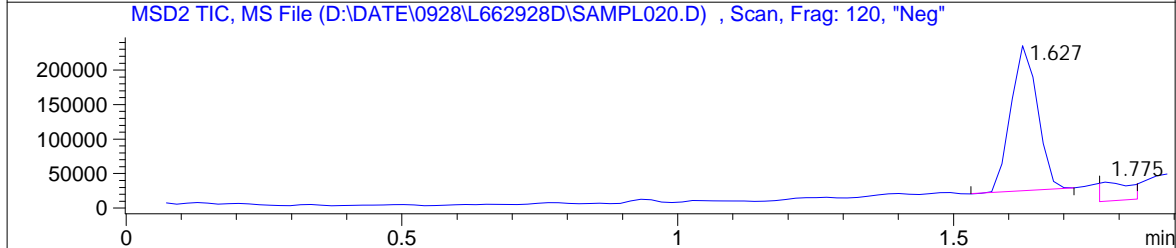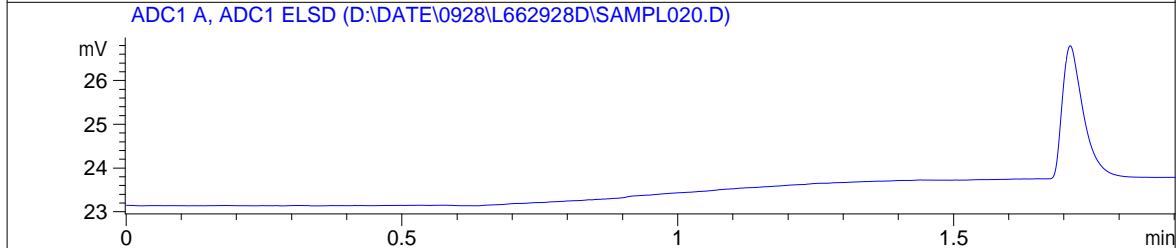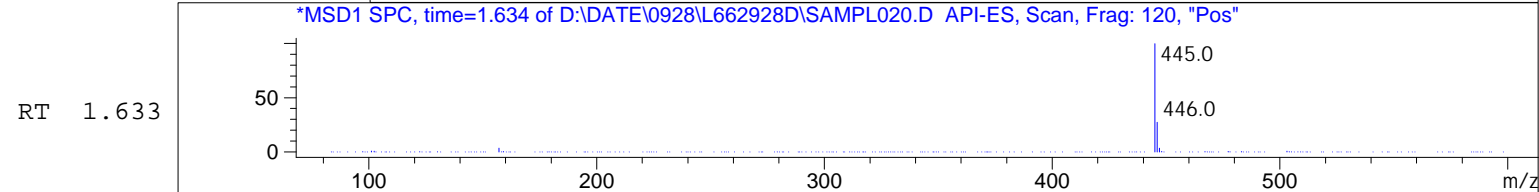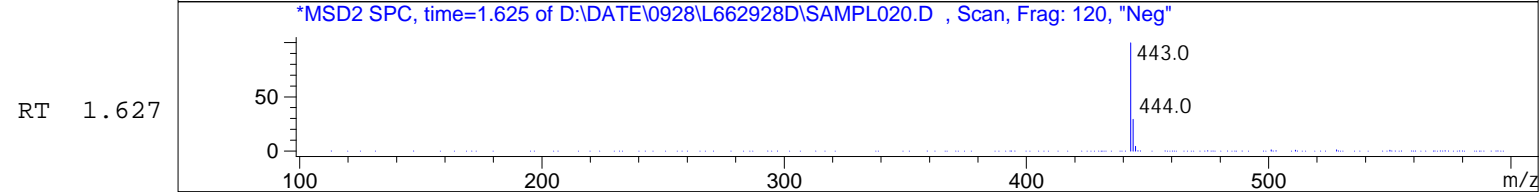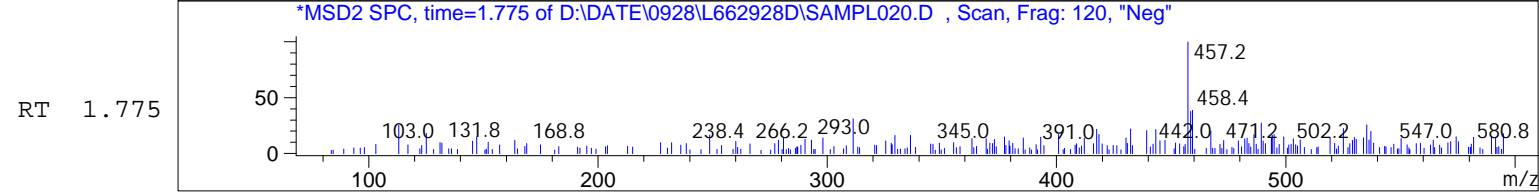

S190

# CLQ362996

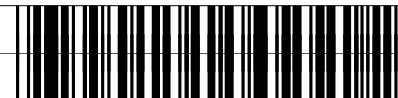

MaxPeak: 100.00%  
Ret\_Time: 1.446 min

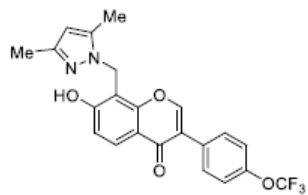

12i

Mol Wt

Exact Mass

| # | Time  | Area%  |
|---|-------|--------|
| 1 | 1.446 | 100.00 |

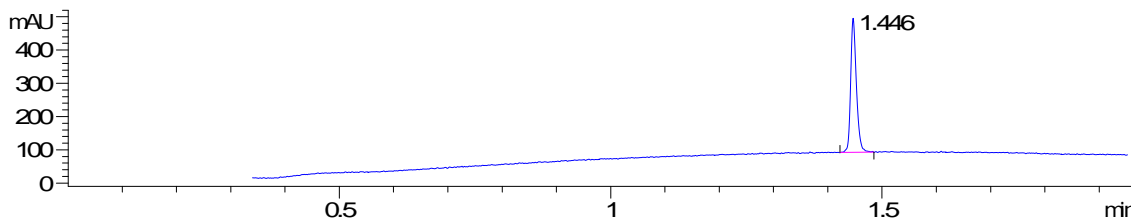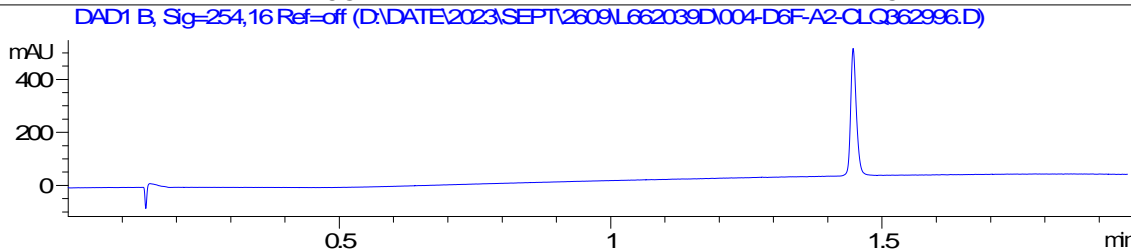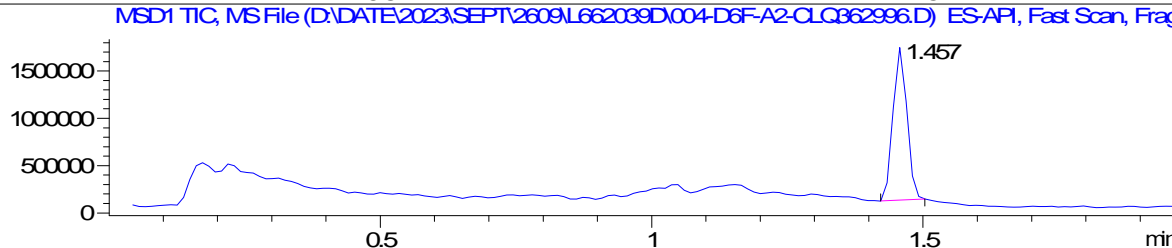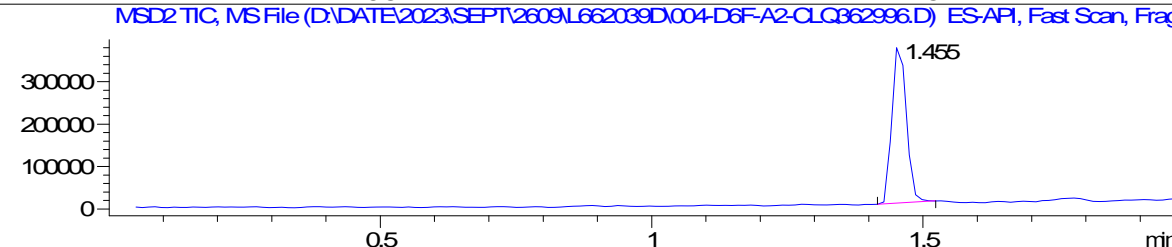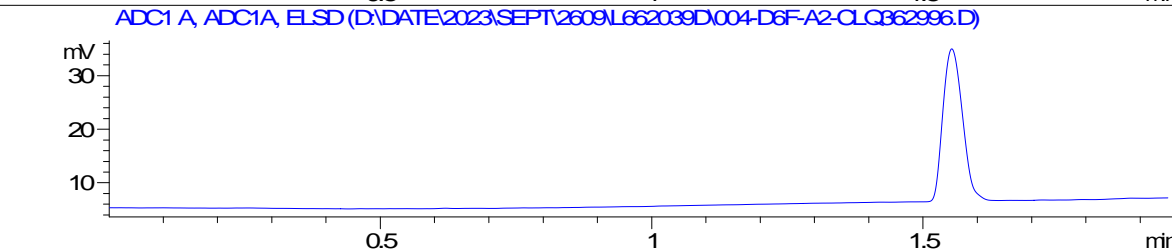

RT 1.457

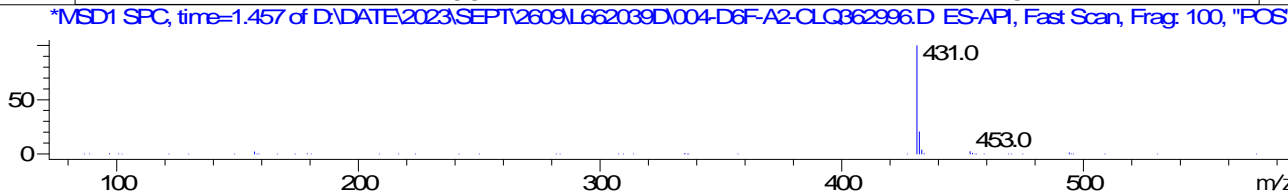

RT 1.455

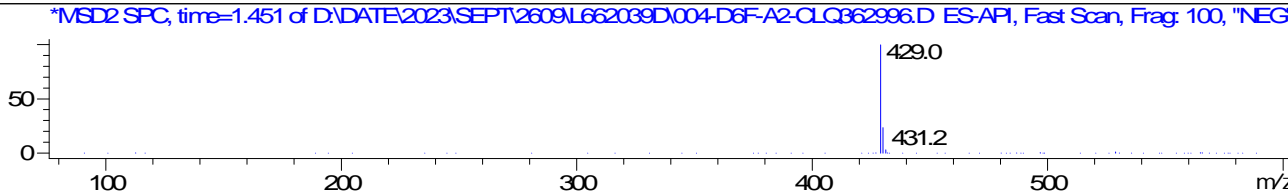

# CLQ379863

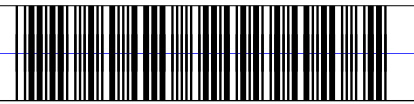

MaxPeak: 98.52%  
Ret\_Time: 0.914 min

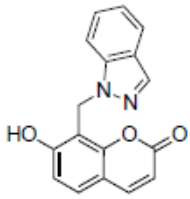

13a

Mol Wt

Exact Mass

| # | Time  | Area% |
|---|-------|-------|
| 1 | 0.874 | 1.48  |
| 2 | 0.914 | 98.52 |

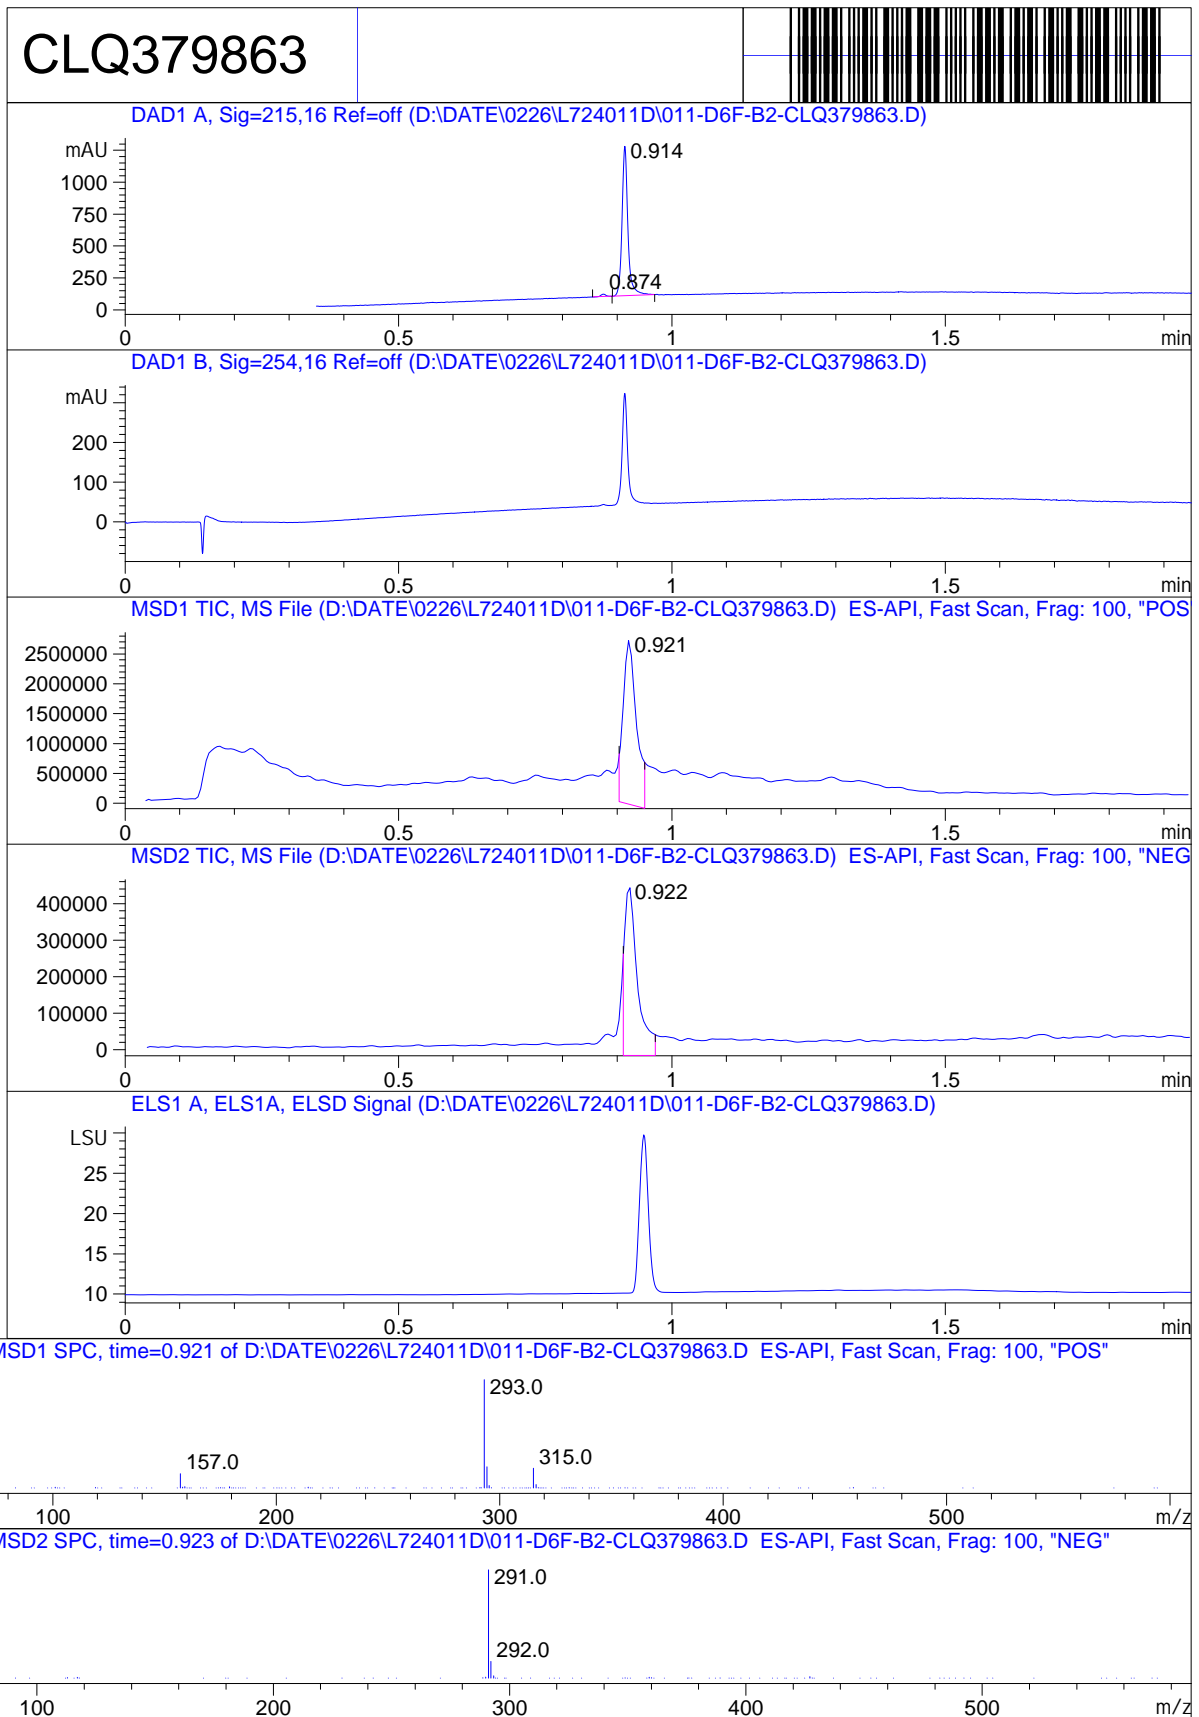

RT 0.921

RT 0.922



MaxPeak: 97.42%  
Ret\_Time: 1.389 min

# IBOX13843

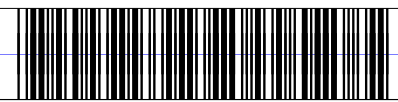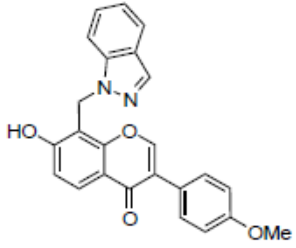

13b

Mol Wt 0

Exact Mass

| # | Time  | Area% |
|---|-------|-------|
| 1 | 1.341 | 2.58  |
| 2 | 1.389 | 97.42 |

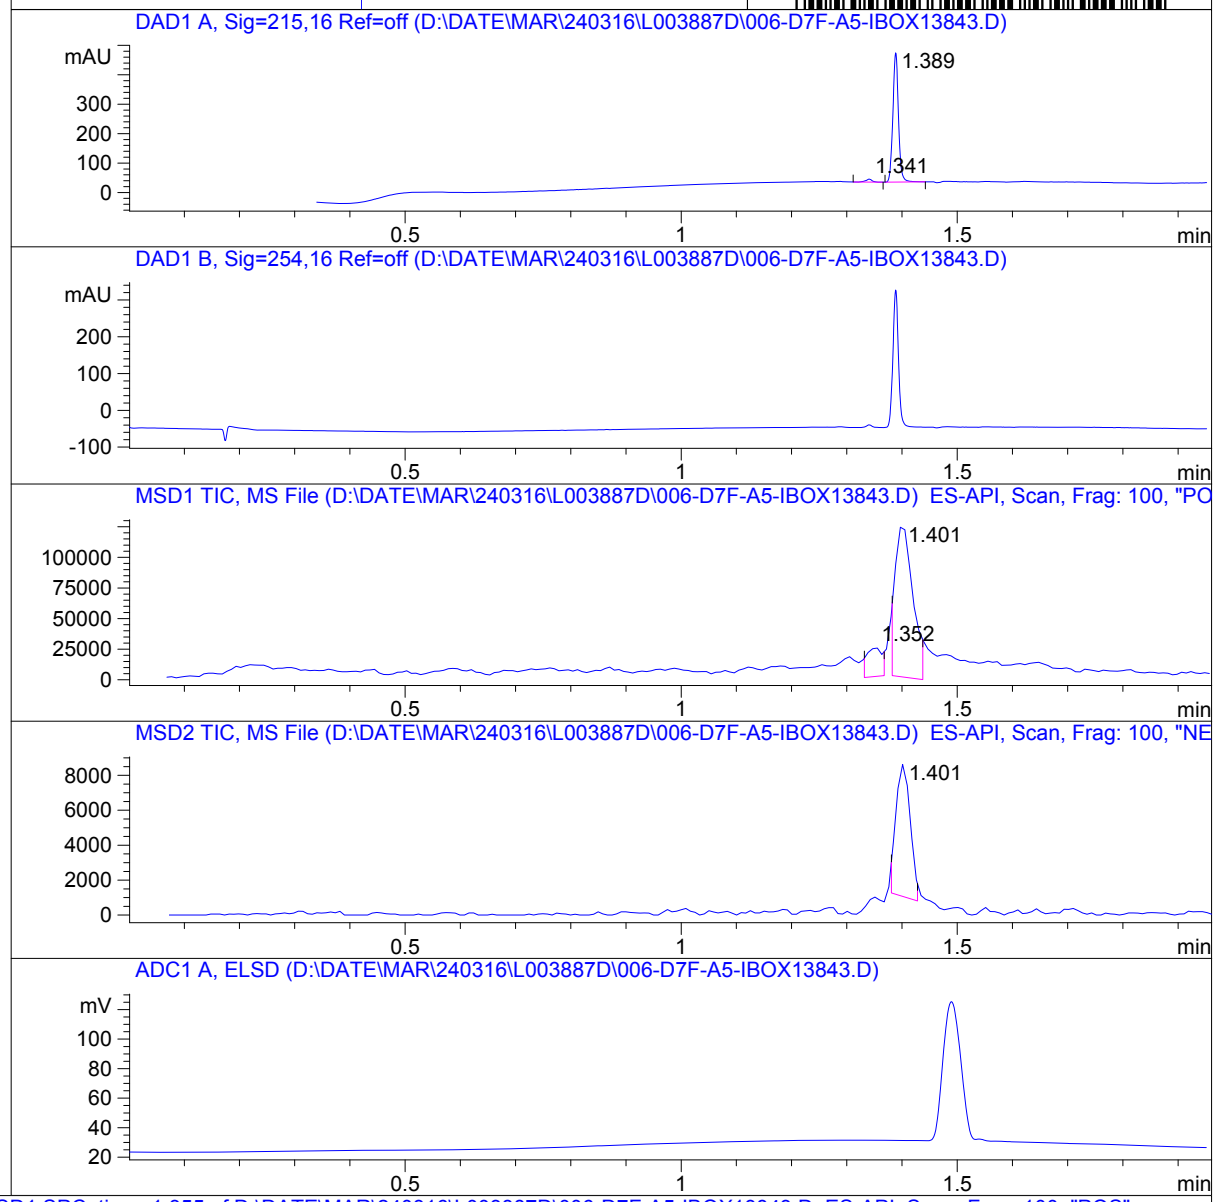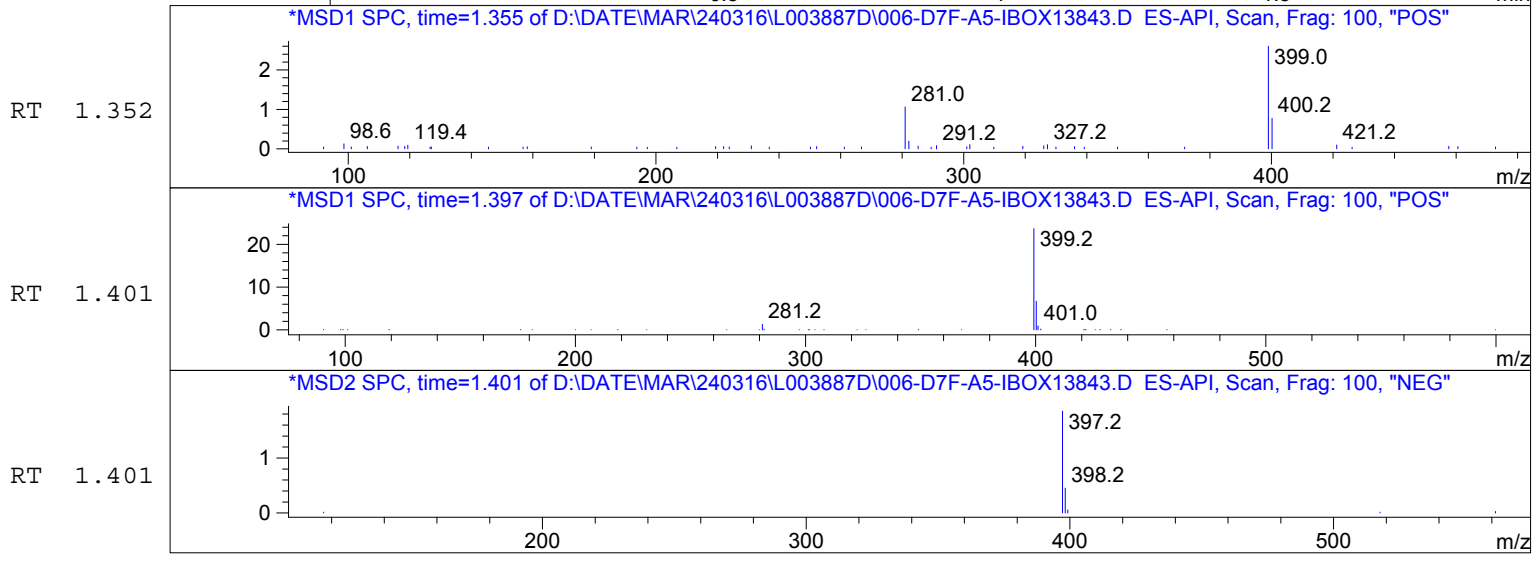

# CLQ379862

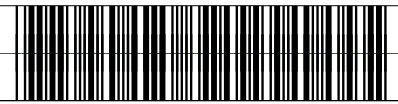

MaxPeak: 94.22%  
Ret\_Time: 0.874 min

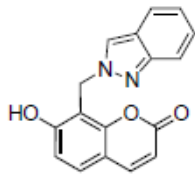

**Mol Wt**  
**Exact Mass**

| # | Time  | Area% |
|---|-------|-------|
| 1 | 0.874 | 94.22 |
| 2 | 0.913 | 5.78  |

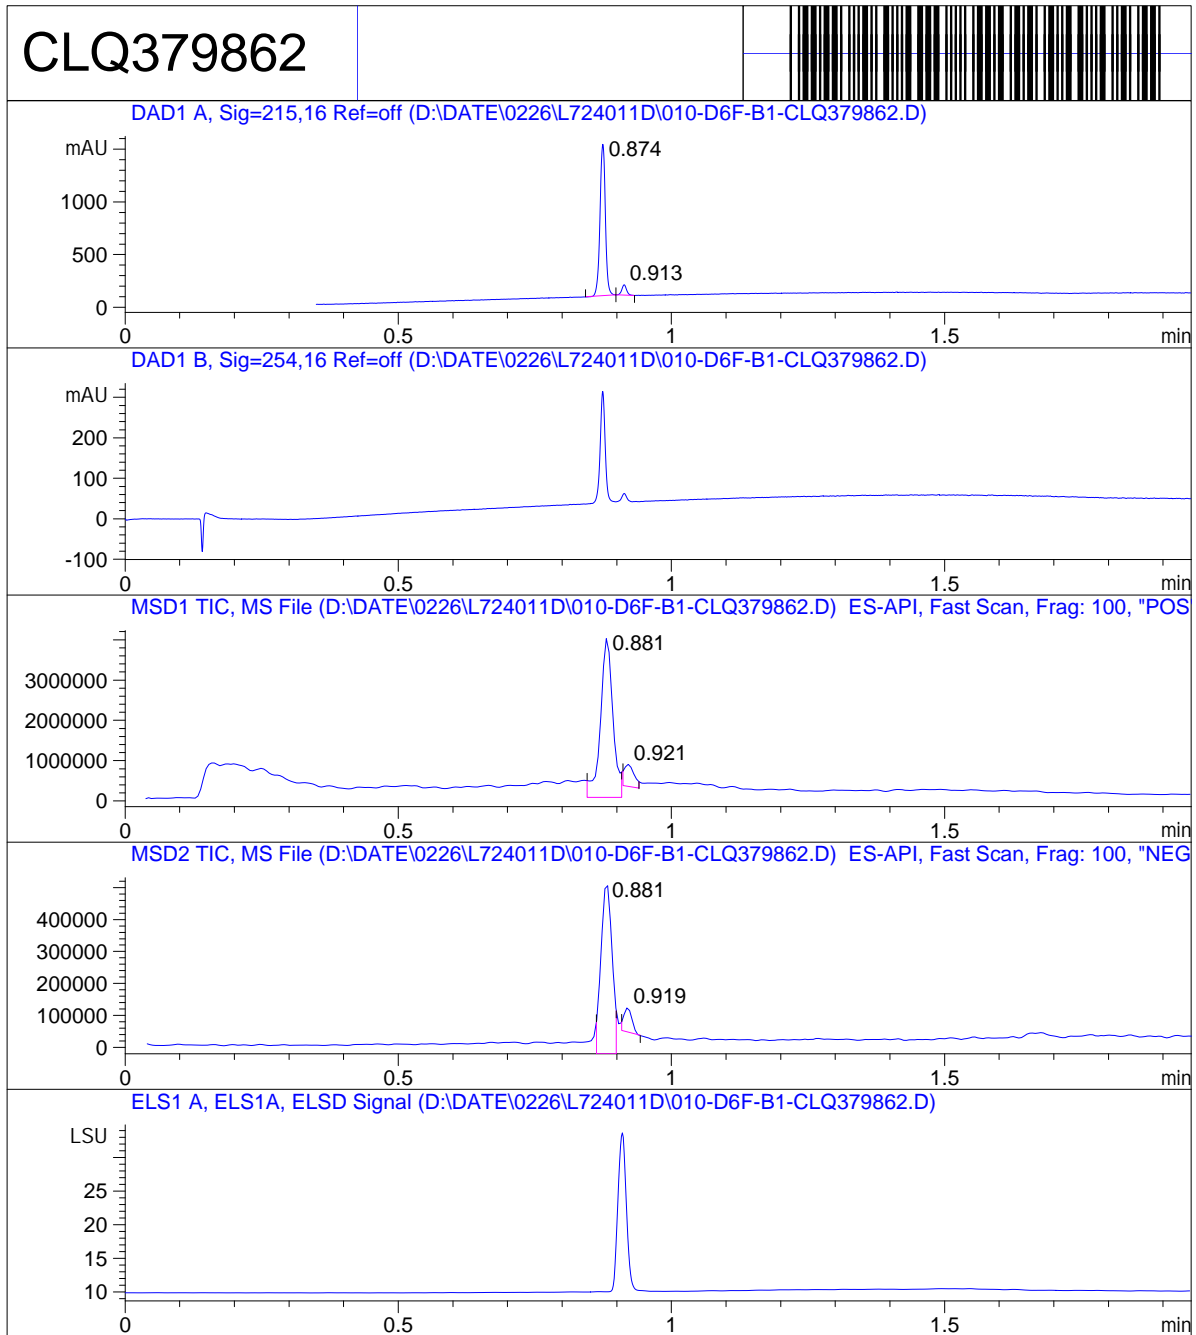

RT 0.881

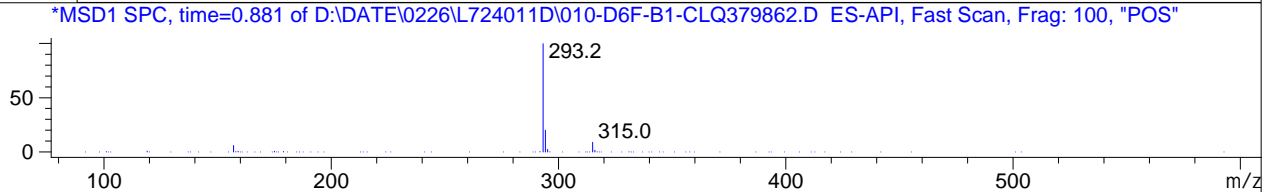

RT 0.921

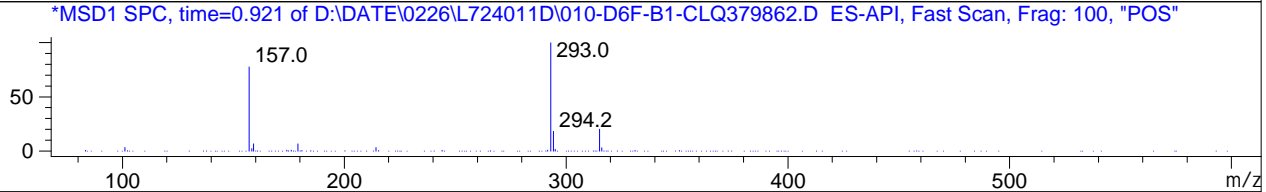

RT 0.881

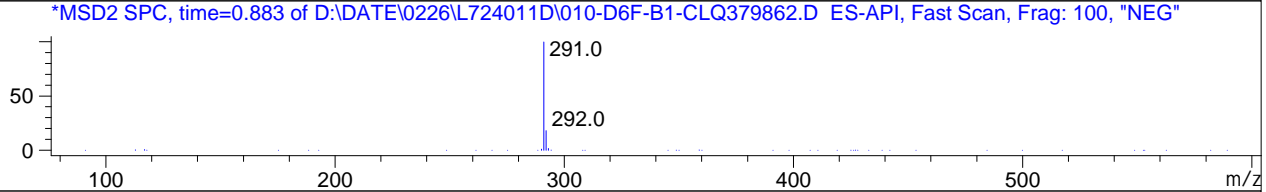

RT 0.919

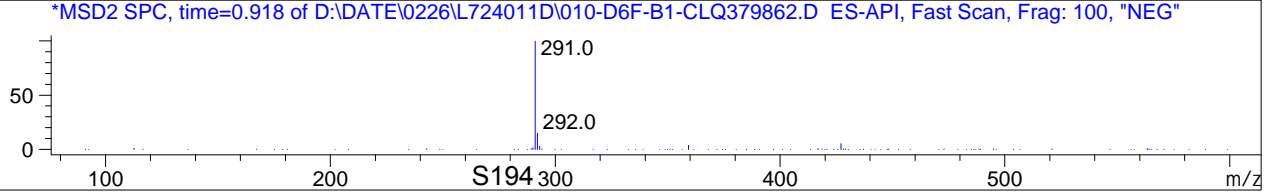

MaxPeak: 93.44%  
Ret\_Time: 1.341 min

# IBOX13844

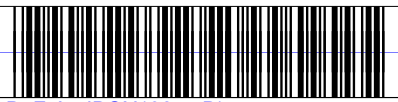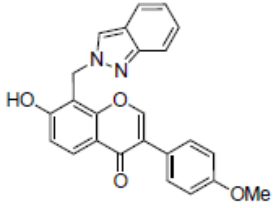

14b

Mol Wt

Exact Mass

| # | Time  | Area% |
|---|-------|-------|
| 1 | 1.341 | 93.44 |
| 2 | 1.389 | 6.56  |

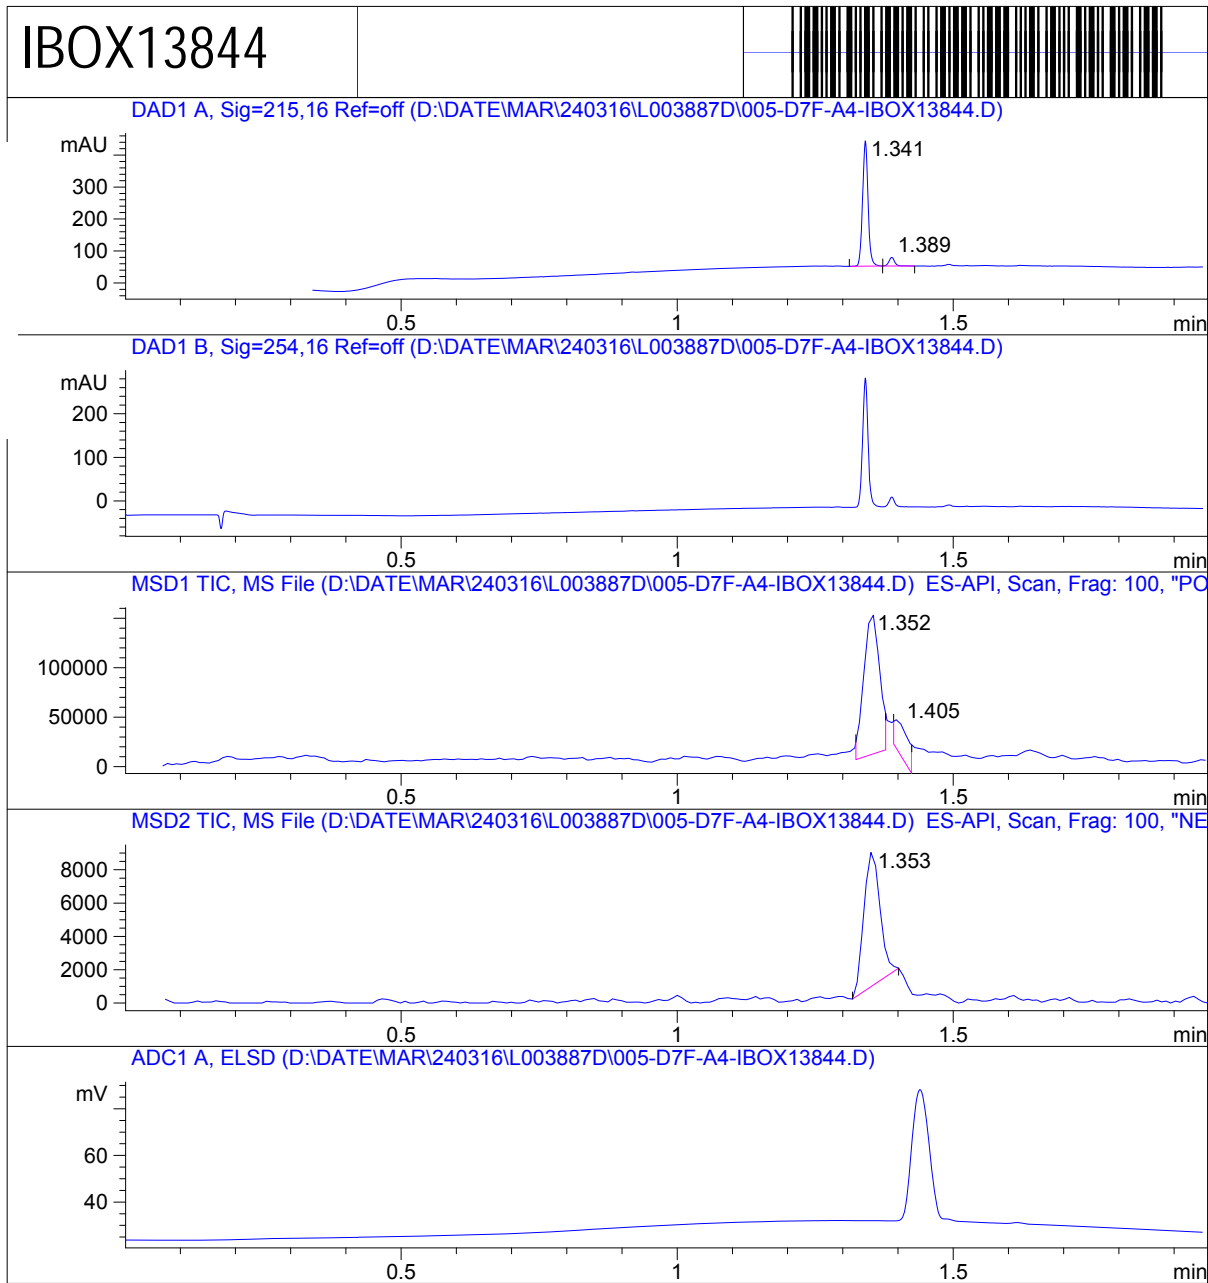

RT 1.352

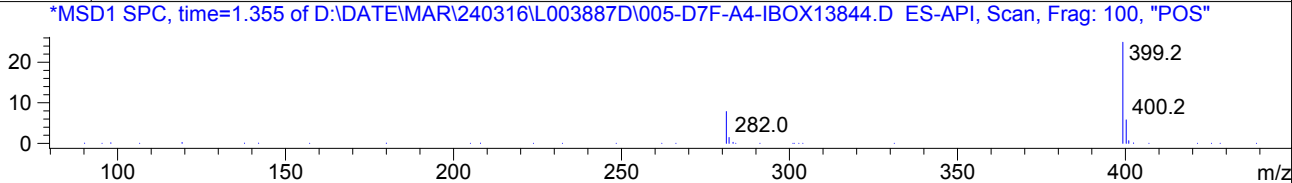

RT 1.405

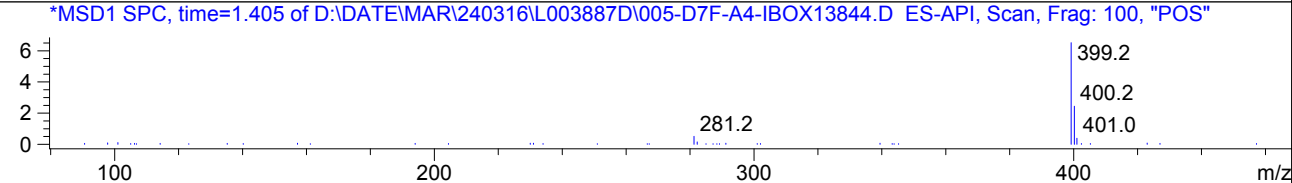

RT 1.353

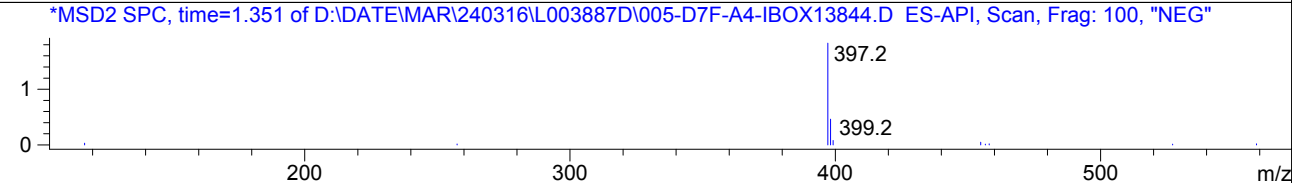

Supplement: d4ra05230g1.pdf [file d4ra05230g1.pdf]
